# Supplementary material for: Efficient enzyme-catalyzed production of diosgenin: inspired by the biotransformation mechanisms of steroid saponins in Talaromyces stollii CLY-6
Source: Royal Society of Chemistry journal article supplement (doi:10.1039/d0gc04152a), 2021-01-01
Supplement: d0gc04152a1.pdf [file d0gc04152a1.pdf]

## Electronic Supplementary Information 1

### **Efficient Enzyme-catalyzed Production of Diosgenin: Inspired by the Biotransformation Mechanisms of Steroid Saponins in *Talaromyces Stollii* CLY-6**

**Leiyu Cheng<sup>1,2,3#</sup>, Han Zhang<sup>1#</sup>, Haiyang Cui<sup>4, 5</sup>, Mehdi D. Davari<sup>4</sup>, Bin Wei<sup>2</sup>, Wenya Wang<sup>2,3\*</sup>, Qipeng Yuan<sup>1,2\*</sup>**

<sup>1</sup>Beijing Advanced Innovation Center for Soft Matter Science and Engineering, Beijing University of Chemical Technology, Beijing 100029, PR China; No.15 North Third Ring East Road, Chaoyang District, Beijing 100029, P. R. China.

<sup>2</sup>State Key Laboratory of Chemical Resource Engineering, College of Life Science and Technology, Beijing University of Chemical Technology, Beijing 100029, P. R. China; No.15 North Third Ring East Road, Chaoyang District, Beijing 100029, P. R. China.

<sup>3</sup>Amoy-BUCT Industrial Bio-technovation Institute, Beijing University of Chemical Technology, Amoy, 361022, China; No.126 Xinyuan Road, Haicang District, Amoy 361028, P. R. China.

<sup>4</sup>Institute of Biotechnology, RWTH Aachen University, Worringerweg 3, Aachen 52074, Germany.

<sup>5</sup>DWI-Leibniz Institute for Interactive Materials, Forckenbeckstraße 50, Aachen 52056, Germany.

**#These authors contributed to work equally.**

**\*Corresponding author.**

E-mail address:

Wangwy@mail.buct.edu.cn (Wenya Wang)

Yuanqp@mail.buct.edu.cn (Qipeng Yuan)

Fax: 010-64437610

Tel: 010-64421335

## 1. Strain isolation and screening

Strain isolation was performed with the medium containing 20 g/L agar and 20 g/L E-DZW (the crude extract of the tubers of *Dioscorea zingiberensis* C.H. Wright). Sample of strains mixture was prepared by mixing 10 mL sterile water with 1 g E-DZW and then diluted, evenly spread on the isolation medium. After being cultured under aerobic conditions at 30 °C for 6 days, colonies on the plate were then picked up based on the morphology, followed by cultivation in potato dextrose agar (PDA) medium. Finally, 6 unknown fungi were obtained and tentatively named as Fungus CLY-1, Fungus CLY-2, Fungus CLY-3, Fungus CLY-4, Fungus CLY-5, and Fungus CLY-6.

These isolated fungi and other 6 purchased filamentous fungi were used for diosgenin production from E-DZW by microbial biotransformation. The medium (pH 5.5) containing 3 g/L glucose, 8 g/L yeast extract, 3 g/L powder (100-mesh) of dried *Dioscorea zingiberensis* C.H. Wright tubers (P-DZW), 1 g/L (NH<sub>4</sub>)<sub>2</sub>SO<sub>4</sub>, 3 g/L KH<sub>2</sub>PO<sub>4</sub>, 2 g/L MgSO<sub>4</sub>•7H<sub>2</sub>O, and 0.8‰ (v/v) Tween 80 was prepared for the submerged culture of fungi at 160 rpm, 30 °C. After 5 days' fermentation, the culture supernatants were collected for bioconversions (20 mL supernatant) using E-DZW (10 mg) as the substrate at pH 5.0, 50 °C for 72 hours. After bioconversions, the supernatants were removed by centrifugation at 8000 rpm for 20 min; then, the obtained products were analyzed by High-Performance Liquid Chromatography (HPLC) (Shimadzu LC-20AT, Japan). The fungus with the highest diosgenin yield was selected for further experiments.

## 2. Microorganism identification

Molecular taxonomy has been applied to classify fungal species since the 1990s<sup>1</sup>, and it has been becoming a powerful method for microorganism identification. Internal Transcribed Spacer (ITS) region and 18S ribosomal DNA (18S rDNA) have been regarded as the potential barcodes for most fungi due to the high degree of interspecific variability. Additionally, several protein-coding areas, such as  $\beta$ -tubulin and

calmodulin genes, have become compelling molecular data that could be accepted as the secondary barcodes for the rapid identification of specimens <sup>2</sup>. Thus, the combination of different DNA markers was considered to be an efficient approach for species-level identification of specific fungi <sup>3</sup>.

Genomic DNA extraction of Fungus CLY-6 was conducted using a Rapid Fungi Genomic DNA Isolation Kit supplied by Sangon Biotech (Shanghai, China). Polymerase chain reactions (PCR) were carried out in a Pro-Flex PCR System (Thermo Scientific, USA) for DNA amplification by using the oligonucleotides as primer sequences (**Table S1**). The resultant PCR products, purified by using DNA Gel Extraction Kit (Omega Biotek, Germany), were sequenced by a POP-7™ Polymer for 3730XL DNA Analyzers (Applied Biosystems, USA). The sequenced barcodes were then analyzed by using the Basic Local Alignment Search Tool (BLAST) in the GenBank (<http://www.ncbi.nlm.nih.gov>), and the obtained data sets were aligned in the Clustal W (version 2.1) program. Maximum-likelihood (ML) trees <sup>4</sup> of the aligned data sets were further constructed using MEGA software (version 6.0.6) <sup>5</sup> with the Kimura 2-parameter model to calculate evolutionary distances. Bootstrap values were calculated from 1000 replicate runs using the routines in the MEGA software.

### **3. Genome sequencing and gene annotation**

Genomic DNA extraction of Fungus CLY-6 was conducted by using a Rapid Fungi Genomic DNA Isolation Kit supplied by Sangon Biotech (Shanghai, China). Then, the fragmentation of genome DNA was carried out by using an M220™ Focused-ultrasonicator (Covaris, USA) for DNA library construction. Afterwards, the end-filling and linker-adding of DNA fragments was performed using an NEB Next® Ultra™ II DNA Library Prep Kit for Illumina® (New England Biolabs GmbH, UK) to obtain a high-quality DNA library for genome sequencing. Subsequently, the genome DNA was sequenced using an Illumina MiSeq 4000 platform at the Institute of Microbial Epidemiology, Military Medical Research Institute (Beijing, China). Quality evaluation of the raw sequencing data was performed using FastQC <sup>6</sup>. The Trimmomatic <sup>7</sup> was

used to improve the accuracy of genome data, then stitched by SPAdes <sup>8</sup>. After supplementing the gap to the contigs obtained by splicing with GapFiller <sup>9</sup>, the correction of editing errors and the insertion and deletion of small fragments during sequence-splicing was performed using PrInSeS-G <sup>10</sup>, resulting in an assembled genome sequence. Next, the genetic elements, such as ORF, tRNA, rRNA, etc., were predicted by Prokka <sup>11</sup>. Comparison of protein sequences was performed by NCBI Blast+ <sup>12</sup> using the databases such as CDD (<https://www.ncbi.nlm.nih.gov/cdd/>), NCBI COG (<https://www.ncbi.nlm.nih.gov/COG/>), NCBI NR (<http://ncbi.nlm.nih.gov/>), PFAM (<http://pfam.xfam.org/>), Swiss-Prot (<https://www.uniprot.org/statistics/Swiss-Prot>) and TrEMBL (<https://www.uniprot.org/statistics/TrEMBL>), etc. to obtain functional annotation information.

#### **4. Native enzyme production**

The inoculum was obtained by inoculating *Talaromyces stollii* CLY-6 in the seed medium (potato dextrose) shaking at 160 rpm, 30 °C for 36 h. The substrate of solid-state fermentation in each Erlenmeyer flask (500 mL) consisted of 7 g bran and 3 g P-DZW, which was moistened with nutrient ion solution (2 g/L (NH<sub>4</sub>)<sub>2</sub>SO<sub>4</sub>, 2 g/L KH<sub>2</sub>PO<sub>4</sub>, 2 g/L MgSO<sub>4</sub>•7H<sub>2</sub>O, pH 5.5) to make the initial moisture level of the medium at 75% before autoclaving. The prepared inoculum was then transferred into mediums, and the fungus was cultivated at 30 °C for 7 days. The secreted proteins were extracted from the medium by adding distilled water and shaking at 160 rpm, 40 °C for 40 min. The supernatant (crude enzyme) was obtained by suction filtration, followed by centrifugation at 10000 rpm, 4 °C for 20 min.

#### **5. Enzyme purification**

The first enzyme purification step was performed by adding ammonium sulfate into the supernatant slowly to 75% of ammonium sulfate, then placing the solution in a refrigerator at 4 °C overnight. The precipitates were collected by centrifugation at 10000 rpm at 4 °C for 15 min, and then re-dissolved in 20 mM sodium phosphate buffer

(pH 6.0), followed by removal of insoluble particles with 0.22  $\mu\text{m}$  filter. An ultrafiltration centrifuge tube with 10 kDa interception (Millipore, USA) was used for protein desalination and enrichment at 4000 rpm, 4 °C. Hereafter, the enzyme purification was carried out using an ÄKTA Purifier HPLC system (GE Healthcare Life Sciences, USA) at 4 °C. The desalted crude protein (pH 6.0) was first applied to a Q-Sepharose Fast Flow column (5 mL, Bersee, China) and eluted by NaCl solution with the concentration of 0.05, 0.1, 0.15, 0.2, 0.25, 0.3 and 0.5 M for 2, 2, 4, 4, 5, 4, and 4 column volumes (CVs), respectively. The active fractions were pooled and desalted, and re-purified by a DEAE-Sepharose Fast Flow column (5 mL, Bersee, China), followed by protein elution by NaCl solution with the concentration of 0.05, 0.1, 0.15, 0.2, 0.25, 0.3, and 0.5 M for 2, 2, 4, 4, 3, 3, 3 and 3 CVs, respectively. The Superdex™ 200 Increase 10/300 GL (GE Healthcare, USA), pre-equilibrated with elution buffer (50 mM sodium phosphate, 150 mM NaCl, pH 7.0) was used for final purification, and the protein was eluted at a flow rate of 0.3 mL/min. Protein purity was evaluated by 10% sodium dodecyl sulfate-polyacrylamide gel electrophoresis (SDS-PAGE). Protein concentration was measured by bicinchoninic acid protein assay kit (Pierce Chemicals, USA) with bovine serum albumin (Sigma, Germany) as the standard.

## 6. Protein identification

The purified protein band was excised from the SDS-PAGE gel for sample preparation following reported procedure <sup>13</sup>. Samples were analyzed by ABI 5800 Matrix-Assisted Laser Desorption/Ionization Time of Flight (MALDI-TOF/TOF) Plus mass spectrometer (Applied Biosystems, USA) with the mass spectrum scanning range from 700 to 3500 Da of peptide mass fingerprinting (PMF). The top ten peaks with high intensities were selected for analysis by secondary ion mass spectrometry. Then, the mass spectrometry data from MALDI-TOF/TOF was analyzed by a GPS Explorer V3.6 software (Applied Biosystems, USA) and a Mascot V2.3 (Matrix Science Ltd., U.K.) with the following search parameters: using annotated carbohydrate-active enzymes (CAZy) (**ESI 2**) as database; trypsin as the digestion enzyme; one missed cleavage site;

fixed modifications of Carbamidomethyl (C); partial modifications of Acetyl (Protein N-term), Deamidated (NQ), Oxidation (M); 100 ppm for precursor ion tolerance and 0.5 Da for fragment ion tolerance. The proteins were successfully identified based on 95% or a higher confidence interval of their scores in the Mascot V2.3 search engine.

Protein analysis was also performed using Liquid Chromatograph Mass Spectrometer (LC-MS/MS, Eksigent nanoLC-Ultra™ 2D System, AB SCIEX, USA). The mass spectrometry data was acquired using a Triple TOF 5600 System (AB SCIEX, USA) fitted with a Nanospray III source (AB SCIEX, USA). The ion spray voltage is 2.5 kV, the curtain gas is 30 PSI, the nebulizer gas is 5PSI, and the interface heater temperature is 150°C. For information-dependent acquisition (IDA), survey scans were acquired in 250 ms, and as many as 35 product ion scans were collected if they exceeded a threshold of 150 counts per second (counts/s) with a 2<sup>+</sup> to 5<sup>+</sup> charge-state. Survey scans were acquired in 250 ms under the information-dependent acquisition mode (IDA, Information Dependent Analysis) with the total cycle time as 2.5 s. The proteins were identified based on 95% or a higher confidence interval of their scores in the Mascot V2.3 based on the acquired MS and MS/MS spectra. The search parameters were as follows: using predicted CAZY library as database (**ESI 2**); the trypsin was the enzyme for digestion; the maximum permissible leakage site is 2; the fixed modifications is Carbamidomethyl (C); the partial modifications were Deamidated (NQ) and Oxidation (M); the fragment ion tolerance is  $\pm 0.6$  Da.

## 7. Enzyme over-expression

The signal peptide sequences of Rhase-TS (first 22 residues) and Gluase-TS (first 19 residues), predicted by SignalP-5.0 Server (<http://www.cbs.dtu.dk/services/SignalP/>), were deleted. After a 6×His-tag was added in C terminal, the genes of Rhase-TS and Gluase-TS were optimized according to the codon preference of *P. pastoris*, followed by sequence synthesis by Sangon Biotech (Shanghai, China). The synthetic sequences have been submitted into the NCBI database (Rhas-TS: Genebank accession no. **MT779018**; Gluase-TS: Genebank accession no. **MT779019**). The



activities were measured in the presence of 1 mM or 10 mM Na<sup>+</sup>, K<sup>+</sup>, Ca<sup>2+</sup>, Fe<sup>2+</sup>, Fe<sup>3+</sup>, Cu<sup>2+</sup>, Mg<sup>2+</sup>, Mn<sup>2+</sup>, Zn<sup>2+</sup>, Co<sup>2+</sup>, dithiothreitol (DTT), sodium dodecyl sulfate (SDS), ethylene diamine tetraacetic acid (EDTA) and  $\beta$ -mercaptoethanol. To better understand the enzyme properties, tolerances of Rhase-TS or Gluase-TS against organic solvents were estimated by measuring the enzyme activity in the presence of 0.1, 0.2, 0.5, 1, 2, 3, 5, 8, 10, 15, 20, 25, 30 % (v/v) methanol, ethanol or DMSO. Substrate specificity was studied by incubating *p*-nitroglycosides or *o*-nitroglycosides with Rhase-TS or Gluase-TS at pH4.5, 60 °C.

## 9. Analytical methods

The thin-layer chromatography (TLC) analysis was performed on a silica gel plate (T225100F, Synthware, China). The CHCl<sub>3</sub>: CH<sub>3</sub>OH: H<sub>2</sub>O (60:27:5, v/v) was used as developing solvent, and spots of compounds were appeared by spraying with 20 % (v/v) H<sub>2</sub>SO<sub>4</sub>, followed by heating at 80 °C for 5 min. The HPLC system was used for the quantification of steroid saponins. The isocratic elution was performed with 10 % water (solvent A) and 90 % methanol (solvent B) by using a C<sub>18</sub> column (5  $\mu$ m, 250 $\times$ 4.6 mm, Shimadzu, Japan) at a flow rate of 1 mL/min for the analysis of steroidal saponins with the UV detector at 203 nm. The rhamnose and glucose were analyzed using a Suger-Pak1 Column (10  $\mu$ m, 300 mm $\times$ 6.5 mm, Waters, USA) at 80 °C, 0.5 mL/min by a differential refractive index detector. The  $M_w$  and molecular formula of compounds dissolved in methanol were identified by mass spectrometry (MS) (Agilent G6500 Series Q-TOF).



**Table S1.** Primer pairs for sequencing DNA barcodes of *Talaromyces stollii* CLY-6

| <b>Region</b>                     | <b>Primer</b> | <b>Primer Sequence 5'to 3'</b> | <b>Direction</b> | <b>Reference</b> |
|-----------------------------------|---------------|--------------------------------|------------------|------------------|
| Internal Transcribed Spacer (ITS) | ITS1          | TCCGTAGGTGAACCTGCGG            | Forward          | 3                |
|                                   | ITS4          | TCCTCCGCTTATTGATATGC           | Reverse          |                  |
| 18S ribosomal DNA (18S rDNA)      | NS1           | GTAGTCATATGCTTGTCTC            | Forward          | 15               |
|                                   | NS6           | GCATCACAGACCTGTTATTGCCTC       | Reverse          |                  |
| $\beta$ -tubulin                  | Bt2a          | GGTAACCAAATCGGTGCTGCTTTC       | Forward          | 3                |
|                                   | Bt2b          | ACCCTCAGTGTAGTGACCCTTGGC       | Reverse          |                  |
| Calmodulin                        | CMD5          | CCGAGTACAAGGAGGCCTTC           | Forward          | 16               |
|                                   | PoCMDR1       | CGCCAATCGAGGTCATGACATGG        | Reverse          |                  |

**Table S2.** Microbial biotransformation of E-DZW.

| Microorganism name              | Depository authority | Deposit number | Diosgenin yield* (%) |
|---------------------------------|----------------------|----------------|----------------------|
| <i>Aspergillus carbonarius</i>  | CICC <sup>a</sup>    | 41254          | 10.2±0.5             |
| <i>Trichoderma viride</i>       | CICC                 | 13038          | 7.8±0.4              |
| <i>Penicillium sclerotiorum</i> | CGMCC <sup>b</sup>   | 3.5676         | 3.4±0.3              |
| <i>Trichoderma reesei</i>       | CGMCC                | 3.3711         | ND <sup>c</sup>      |
| <i>Trichoderma harzianum</i>    | CGMCC                | 3.6604         | 1.1±0.2              |
| <i>Penicillium sp.</i>          | CGMCC                | 3.4426         | 2.1±0.3              |
| Fungus CLY-1                    | None                 | None           | ND                   |
| Fungus CLY-2                    | None                 | None           | ND                   |
| Fungus CLY-3                    | None                 | None           | ND                   |
| Fungus CLY-4                    | None                 | None           | ND                   |
| Fungus CLY-5                    | None                 | None           | ND                   |
| Fungus CLY-6                    | CGMCC                | 3.16013        | 72.5±1.2             |

<sup>a</sup> CICC, China Center of Industrial Culture Collection.

<sup>b</sup> CGMCC, China General Microbiological Culture Collection Center.

<sup>c</sup> ND, Not detected.

\* The diosgenin yield (%) was defined as the ratio of actual diosgenin output to theoretical diosgenin output.

**Table S3.** The features of raw sequencing data and improved one of *Talaromyces stollii* CLY-6\*

|                        | Raw sequencing data |           | Improved raw sequencing data |           |
|------------------------|---------------------|-----------|------------------------------|-----------|
|                        | Number (bp)         | Ratio (%) | Number                       | Ratio (%) |
| Total Reads Count      | 7872558             | -         | 7485848                      | -         |
| Total Bases            | 2248854514          | -         | 1905578505                   | -         |
| Average Read Length    | 285.66              | -         | 254.56                       | -         |
| Q10 Bases <sup>a</sup> | 2202551015          | 97.94%    | 1901461575                   | 99.78%    |
| Q20 Bases              | 2099855535          | 93.37%    | 1879588635                   | 98.64%    |
| Q30 Bases              | 1923236030          | 85.52%    | 1790340303                   | 93.95%    |
| N Bases <sup>b</sup>   | 38544               | 0.00%     | 8                            | 0.00%     |
| GC Bases               | 1067411216          | 47.46%    | 901776625                    | 47.32%    |

\* The raw data from sequencing contains low-quality sequences and sequences with connectors; thus, original data must be filtered to get clean data for ensuring the quality of information analysis. The result showed that the number of genome's total bases decreased from 2248854514 to 1905578505, the ratio of Q30 Bases (one out of 1,000 bases will be misidentified) increased from 85.52% to 93.95%, and the number of unknown bases (N Bases) decreased from 38544 to 8 by optimization, indicating the high quality of the data for subsequent genome assembling.

<sup>a</sup> Q(n) Bases, the bases with Phred quality score above n.

<sup>b</sup> N Bases, unknown bases.

**Table S4.** Information of assembled genome sequence of *Talaromyces stollii* CLY-6\*

| <b>Nuclear genome</b>     | <b>Number</b> |
|---------------------------|---------------|
| Total length (bp)         | 34462971      |
| N Bases <sup>a</sup> (bp) | 890           |
| Max length (bp)           | 1329510       |
| Average length (bp)       | 142409        |
| Contig number (bp)        | 242           |
| GC Ratio (%)              | 46            |

<sup>a</sup> N Bases, unknown bases.

\* The assembled genome consists of 34462971 bp containing 242 contigs with a GC ratio (%) of 0.46.

**Table S5.** Overview of predicted genes in *Talaromyces stollii* CLY-6\*

| <b>Predicted gene</b> | <b>Counts</b> |
|-----------------------|---------------|
| All genes number      | 12428         |
| Length >=500 bp       | 11303         |
| Length >=1000 bp      | 8091          |
| Max length (bp)       | 23691         |
| Min length (bp)       | 120           |
| All genes length (bp) | 18513138      |
| Mean length (bp)      | 1489.63       |

\* Results showed that a total of 12428 genes were predicted, and coding regions occupy almost 53.72% of the genome with a mean length of 1489.63 bp.

**Table S6.** Overview of annotated genes in *Talaromyces stollii* CLY-6

| <b>Database</b>                    | <b>Number of Unigenes</b> | <b>Percentage (%)<sup>a</sup></b> |
|------------------------------------|---------------------------|-----------------------------------|
| Annotated in CDD                   | 9242                      | 74.36                             |
| Annotated in KOG                   | 6511                      | 52.39                             |
| Annotated in NR                    | 12256                     | 98.62                             |
| Annotated in PFAM                  | 8687                      | 69.9                              |
| Annotated in Swissprot             | 8451                      | 68                                |
| Annotated in TrEMBL                | 12212                     | 98.26                             |
| Annotated in GO                    | 8715                      | 70.12                             |
| Annotated in KEGG                  | 3975                      | 31.98                             |
| Annotated in at least one database | 12259                     | 98.64                             |
| Annotated in all database          | 3156                      | 25.39                             |
| Total Unigenes                     | 12428                     | 100                               |

<sup>a</sup> The ratio of the number of genes annotated in the database to the total number of genes (12428)

**Table S7.** Purification of Rhase-TS from *Talaromyces stollii* CLY-6.

| <b>Purification steps</b>       | <b>Total protein<br/>(mg)</b> | <b>Total activity<br/>(U)<sup>a</sup></b> | <b>Specific activity<br/>(U/mg)<sup>b</sup></b> | <b>Yield<br/>(%)</b> | <b>Purification<br/>(fold)</b> |
|---------------------------------|-------------------------------|-------------------------------------------|-------------------------------------------------|----------------------|--------------------------------|
| Crude extract                   | 1545.2                        | 1882.8                                    | 1.2                                             | 100                  | 1                              |
| Ammonium sulfate precipitation  | 1056.5                        | 1249.4                                    | 1.2                                             | 66.4                 | 1                              |
| Q-sepharose FF                  | 10.3                          | 835.6                                     | 81.1                                            | 44.4                 | 67.6                           |
| DEAE-sepharose FF               | 5.8                           | 583.8                                     | 100.7                                           | 31                   | 83.9                           |
| Suerdex™ 200 Increase 10/300 GL | 1.2                           | 167.5                                     | 139.6                                           | 8.9                  | 116.3                          |

<sup>a</sup> One unit (U) of enzyme activity was defined as the amount of protein to convert 1  $\mu\text{mol S}_3$  per 1 hour.

<sup>b</sup> Specific activity was described as the activities per mg of protein.

**Table S8.** Purification of Gluase-TS from *Talaromyces stollii* CLY-6.

| <b>Purification steps</b>       | <b>Total protein<br/>(mg)</b> | <b>Total activity<br/>(U)<sup>a</sup></b> | <b>Specific activity<br/>(U/mg)<sup>b</sup></b> | <b>Yield<br/>(%)</b> | <b>Purification<br/>(fold)</b> |
|---------------------------------|-------------------------------|-------------------------------------------|-------------------------------------------------|----------------------|--------------------------------|
| Crude extract                   | 1545.2                        | 46.4                                      | 0.03                                            | 100                  | 1                              |
| Ammonium sulfate precipitation  | 1056.5                        | 32.5                                      | 0.03                                            | 70.04                | 1                              |
| Q-sepharose FF                  | 40.3                          | 13.2                                      | 0.33                                            | 28.45                | 11                             |
| DEAE-sepharose FF               | 10.5                          | 5.7                                       | 0.54                                            | 12.28                | 18                             |
| Suerdex™ 200 Increase 10/300 GL | 1.8                           | 2.2                                       | 1.22                                            | 4.74                 | 40.67                          |

<sup>a</sup> One unit (U) of enzyme activity was defined as the amount of protein to convert 1  $\mu\text{mol S}_6$  per 1 hour.

<sup>b</sup> Specific activity was described as the activities per mg of protein.

**Table S9.** Matched peptides of protein 10806 and 3425 from *Talaromyces stollii* CLY-6 by MALDI-TOF/TOF analysis.

| <b>Protein</b> | <b>Observed mass</b> | <b>Theoretical mass</b> | <b>Calculated mass</b> | <b>ppm</b> | <b>Score</b>                | <b>Peptide</b>          |
|----------------|----------------------|-------------------------|------------------------|------------|-----------------------------|-------------------------|
| <b>10086</b>   | 1866.0626            | 1865.0553               | 1864.9418              | 60.9       | 134                         | K. LSSDGTTPSILVLDYER. N |
|                | 1396.8051            | 1395.7978               | 1395.7147              | 59.6       | 74                          | R. NVEGYATFQVIR. S      |
|                | 1343.7961            | 1342.7888               | 1342.7033              | 63.7       | 56                          | K. FNLVYAYALNR. W       |
|                | 1235.7146            | 1234.7073               | 1234.6346              | 58.9       | 63                          | K. ISPYASGYHLK. A       |
|                | 911.5198             | 910.5126                | 910.4661               | 51         | 29                          | K. GGQVFTFR. Q          |
| <b>3425</b>    | 982.5625             | 981.5552                | 981.4880               | 68.5       | 67                          | K. TVYVGNSSR. N         |
|                | 999.5364             | 998.5292                | 998.4603               | 68.9       | 68                          | R. GVAMAEHR. G          |
|                | 1109.6451            | 1108.6378               | 1108.5625              | 67.9       | 76                          | K. EINQHVDVR. G         |
|                | 1328.7667            | 1327.7594               | 1327.6732              | 65.0       | 97                          | K. NVDGALPLTGSER. F     |
|                | 1434.8944            | 1433.8871               | 1433.7991              | 61.4       | 110                         | K. GVDVQLGPVAGPLGR. A   |
|                | 1478.7800            | 1477.7727               | 1477.6738              | 66.9       | 80                          | K. HYIGYEQEHFR. Q       |
|                | 1620.0240            | 1619.0167               | 1618.9155              | 62.5       | 73                          | R. GKGVDVQLGPVAGPLGR. A |
|                | 1834.0537            | 1833.0464               | 1832.9268              | 65.2       | 173                         | R. LSLGAGEEAQWTTTLTR. R |
| 2097.2554      | 2096.2481            | 2096.1154               | 63.3                   | 155        | K. VAGIEVPQLYVSLGGPSDAPK. V |                         |

**Table S10.** Matched peptides of protein 10806 from *Talaromyces stollii* CLY-6 by LC-MS/MS analysis.

| Start | End | Observed mass | Theoretical mass | Calculated mass | ppm | Score | Peptide                                 |
|-------|-----|---------------|------------------|-----------------|-----|-------|-----------------------------------------|
| 49    | 77  | 1081.8956     | 3242.665         | 3242.6459       | 6   | 64    | K. LSSDGTTPSILVLDYERNVEGYATFQVIR. S     |
| 94    | 115 | 1207.5785     | 2413.1424        | 2413.1293       | 5   | 85    | R. ALLDNYMADGPLPLAAAMDTYR. I            |
| 182   | 188 | 379.7196      | 757.4247         | 757.4235        | 2   | 56    | R. IWGVGAR. T                           |
| 355   | 387 | 903.4389      | 3609.7264        | 3609.7733       | -13 | 1     | K. MYSSPLTNSSALQDFLLGTNPLPVSVDGSRRDR. I |
| 434   | 439 | 362.7108      | 723.4069         | 723.4028        | 6   | 48    | K. VQQPPR. T                            |
| 523   | 533 | 672.3599      | 1342.705         | 1342.7033       | 1   | 63    | K. FNLVYAYALNR. W                       |
| 616   | 633 | 862.4261      | 1722.8376        | 1722.8325       | 3   | 38    | R. AGALAFSNASSASGWAQK. I                |
| 634   | 644 | 618.3251      | 1234.6356        | 1234.6346       | 1   | 46    | K. ISPYASGYHLK. A                       |
| 645   | 657 | 459.2249      | 1374.6529        | 1374.6528       | 0   | 24    | K. AAFHANDSTNAKK. L                     |
| 711   | 738 | 1079.2813     | 3234.8222        | 3234.807        | 5   | 29    | R. YVLGIQPLVPGFKQWQIVPQTLGLQWAR. G      |
| 739   | 745 | 375.2071      | 748.3997         | 748.398         | 2   | 24    | R. GSHPVPR. G                           |
| 786   | 814 | 806.4184      | 3221.6443        | 3221.6292       | 5   | 31    | K. GYQVSGCTVVNNSTFLVKGQVFTFRQTK.        |



**Table S11.** Effect of metal ions and reagents on Rhase-TS and Gluase-TS.

| Metal ions or reagents    | Relative activity <sup>±</sup> ±SD <sup>a</sup> (%) at: |             |             |             |
|---------------------------|---------------------------------------------------------|-------------|-------------|-------------|
|                           | 1 mM                                                    |             | 10 mM       |             |
|                           | Rhase-TS                                                | Gluase-TS   | Rhase-TS    | Gluase-TS   |
| Control                   | 100±3.24                                                | 100±4.52    | 100±2.17    | 100±4.29    |
| Na <sup>+</sup>           | 96.56±2.45                                              | 98.53±3.19  | 94.76±2.85  | 98.28±2.18  |
| K <sup>+</sup>            | 98.45±3.12                                              | 97.51±2.98  | 102.34±3.96 | 101.71±3.29 |
| Ca <sup>2+</sup>          | 103.27±2.98                                             | 101.51±4.21 | 100.18±3.21 | 102.57±4.15 |
| Fe <sup>2+</sup>          | 100.04±2.79                                             | 98.52±3.28  | 95.34±3.19  | 90.57±3.87  |
| Fe <sup>3+</sup>          | 100.58±3.20                                             | 101.23±3.49 | 103.92±3.42 | 96.28±3.63  |
| Mg <sup>2+</sup>          | 107.34±2.59                                             | 120.51±4.22 | 100.32±3.26 | 123.71±3.29 |
| Mn <sup>2+</sup>          | 101.56±3.78                                             | 149.25±3.29 | 94.65±4.18  | 144.85±4.12 |
| Zn <sup>2+</sup>          | 100.72±4.56                                             | 130.35±3.53 | 97.93±2.18  | 127.71±4.17 |
| Cu <sup>2+</sup>          | 97.54±5.23                                              | 86.57±4.21  | 98.82±5.42  | 65.71±3.21  |
| Co <sup>2+</sup>          | 96.56±4.26                                              | 101.34±3.98 | 94.76±4.87  | 102.28±3.93 |
| SDS                       | 98.54±3.45                                              | 96.56±4.18  | 42.56±4.72  | 68.28±2.97  |
| DTT                       | 94.92±3.16                                              | 96.82±3.29  | 98.25±3.21  | 101.85±4.27 |
| EDTA                      | 106.34±5.76                                             | 102.58±3.29 | 97.43±3.19  | 97.54±4.21  |
| <i>β</i> -Mercaptoethanol | 101.17±4.75                                             | 99.28±4.16  | 98.29±2.96  | 100.6±3.19  |

\* Relative activity was described as the percentage of control activity.

<sup>a</sup> SD, Standard deviation.

**Table S12.** Substrate specificity of Rhase-TS and Gluase-TS.

| Substrate                                            | Relative activity of Rhase-TS±SD <sup>a</sup> (%) | Relative activity <sup>c</sup> of Gluase-TS±SD (%) |
|------------------------------------------------------|---------------------------------------------------|----------------------------------------------------|
| <i>p</i> -Nitrophenyl- $\beta$ -D-galactopyranoside  | ND <sup>b</sup>                                   | ND                                                 |
| <i>o</i> -Nitrophenyl- $\beta$ -D-galactopyranoside  | ND                                                | ND                                                 |
| <i>p</i> -Nitrophenyl- $\alpha$ -D-galactopyranoside | ND                                                | ND                                                 |
| <i>o</i> -Nitrophenyl- $\beta$ -D-xylopyranoside     | ND                                                | 95.54±3.43                                         |
| <i>p</i> -Nitrophenyl- $\beta$ -D-xylopyranoside     | ND                                                | 74.32±4.12                                         |
| <i>p</i> -Nitrophenyl- $\alpha$ -L-arabinopyranoside | ND                                                | ND                                                 |
| <i>p</i> -Nitrophenyl- $\alpha$ -D-mannopyranoside   | ND                                                | ND                                                 |
| <i>p</i> -Nitrophenyl- $\beta$ -D-glucopyranoside    | ND                                                | ND                                                 |
| <i>p</i> -Nitrophenyl- $\alpha$ -D-glucopyranoside   | ND                                                | ND                                                 |
| <i>o</i> -Nitrophenyl- $\beta$ -D-glucopyranoside    | ND                                                | 100                                                |
| <i>p</i> -Nitrophenyl- $\alpha$ -L-rhamnopyranoside  | ND                                                | ND                                                 |

<sup>a</sup> SD, Standard Deviation.

<sup>b</sup> ND, Not detected.

<sup>c</sup> Activity of Gluase-TS against *o*-Nitrophenyl- $\beta$ -D-glucopyranoside was defined as 100%.

**Table S13.** The typical <sup>1</sup>H chemical shifts ( $\delta$  in ppm) of final product framework\*

| Chemical shifts | Peak type and H number |
|-----------------|------------------------|
| 0.81            | s, 6H                  |
| 0.81            | d, 3H                  |
| 0.99            | d, 3H                  |
| 1.05            | s, 3H                  |
| 1.98-2.04       | m, 2H                  |
| 2.22-2.35       | m, 4H                  |
| 3.40            | t, 1H                  |
| 3.48-3.60       | m, 2H                  |
| 4.43            | q, 1H                  |
| 5.37            | d, 1H                  |

\***Note:** <sup>1</sup>H NMR of the final product was carried out with the conditions of 600 MHz; s: single peak; d: double peaks; m: multiple peaks; t: triple peaks; q: quaternary peaks. The chemical structure of the final product was identified as diosgenin by comparison with those reported in literatures<sup>17-19</sup>.

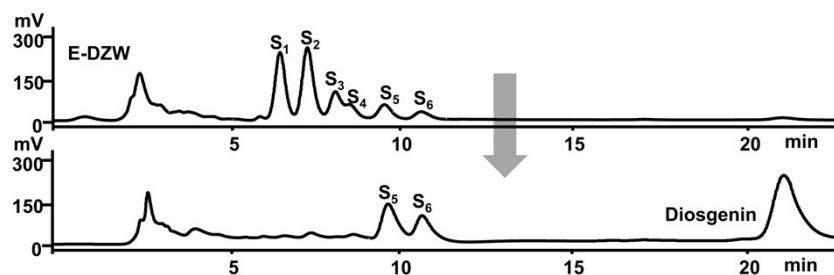

**Figure S1.** HPLC analysis of microbial transformation of E-DZW by *Talaromyces stollii* CLY-6; results showed that substrate S<sub>1</sub>, S<sub>2</sub>, S<sub>3</sub>, and S<sub>4</sub> in E-DZW were converted with final product as a mixture of S<sub>5</sub>, S<sub>6</sub>, and diosgenin (yield: 72.5%) within 72 h. Diosgenin yield was defined as the percentage of theoretical yield.

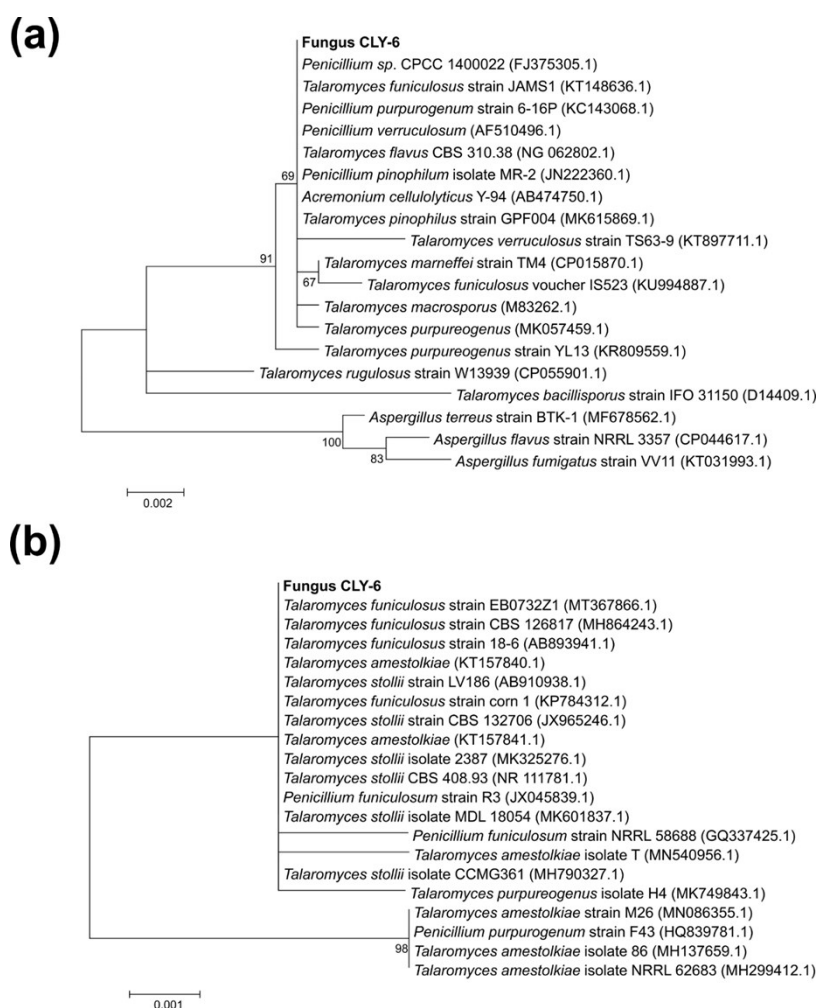

**Figure S2.** The Maximum-likelihood (ML) trees of (a) 18S ribosomal DNA and (b) Internal Transcribed Spacer constructed by using MEGA software (version 6.0.6) with Kimura 2-parameter model for the calculation of evolutionary distances. Bootstrap values (1000 replicate runs) greater than 50% are listed. Results showed that *Talaromyces* and *Penicillium* species were grouped in a single cluster, and Fungus CLY-6 was well-placed together with *Talaromyces funiculosus*, *Talaromyces pinophilus*, *Talaromyces amestolkiae*, *Talaromyces stollii*, and *Penicillium purpurogenum* etc.

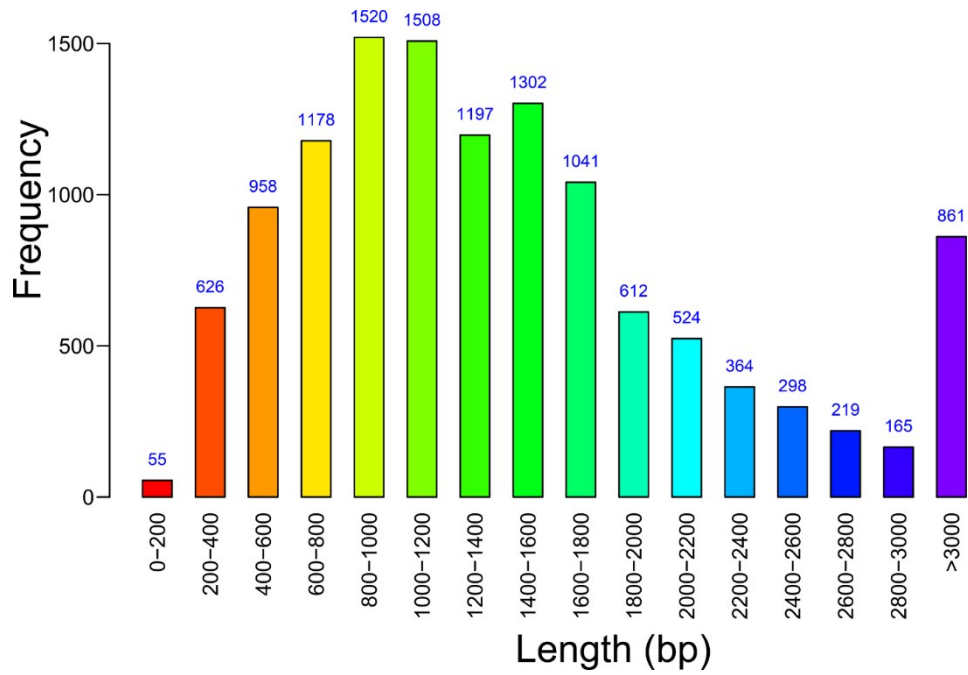

**Figure S3.** Gene length distribution. The horizontal axis is the gene length interval, and the vertical axis is the number of genes in the corresponding interval. Results showed that gene length distributed mainly in the range of 200~2200 bp.

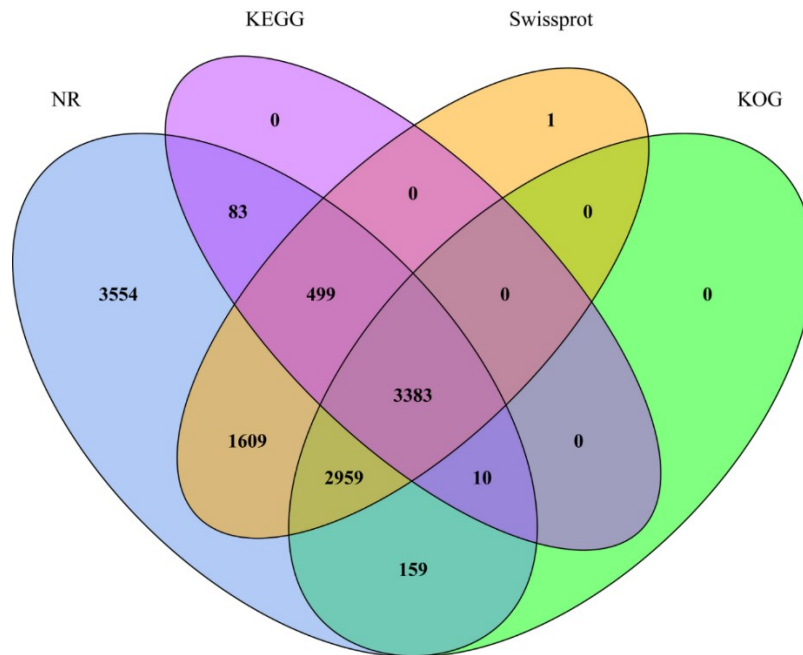

**Figure S4.** Venn diagram of annotated genes in databases. Green, yellow, violet and blue area represent the number of annotated genes from *Talaromyces stollii* CLY-6 in KOG, Swissprot, KEGG, and NR databases, respectively. Overlapping area represents the number of shared annotated-genes in different databases.

(a)

```

1 MRIGRQFALG GLLYASIGLA NI FPSYEPLT YTQSDGSSLP ADNGTVFKLS SDGTTPSILV
61 LDYERNVEGY ATFQVIRSSG NTSVFEMSYS ETRALLDNYM ADGPLPLAAA MDTYRIDRYN
121 ITNQYAYTNH LIQGALRYQK LNLSSAGELE LSFLGFIP TV DNLPLSDLPG SFNCSDPVLN
181 RIWGVGAR TV QLNEFPANSL PDFWVITDEG ALVDLAPQP FAADFATALT TYELDFSVKP
241 MSNGFGFTVL SDTLNGIYI FVDVAHSSIS AHSGSTELDT LPLVSAILPS TVSLNKWHTV
301 HSTVNNNDIT VDIDGLSLLN FSQSSSSFGS FGLGASLGHS AIFTNVSLTA FGTKMYSSPL
361 TNSSALQDFL LGTNPLPVSV DGSRRDR IAY AGDL DITGT AFASTYGH DY INGS MNLLGS
421 FQLLPGFV SVKVQQPPRT EDIQANITGL IGYSFSLASA MAQYEQTGD TGFLTYWAPK
481 AARLFDWAHS QTLGSGLLNI SNPAFGGDWN YYDPPLSGVV AKFNLVYAYA LNRWLPFMAD
541 GGLNTLYTS RLESLQNAI ANLWSDTLQA YYLSESYTDF FSQEANALAI LSN TASGNHT
601 ANTILDSLRS ELYVRAGALA FSNASSASGW AQKISPYASG YHLKAAFHAN DSTNAKLLH
661 SVWGPMSDPS HTNYTGCTWE TLDADGTPGL GAP TSLCHAW GAGPTADLSR YVLGIQPLVP
721 GFKWQIVPQ TLGLQWARGS HPVPRGTIDV SWSFNNSGLL EMTVIAPPGT DGTVYLP SPL
801 QTSLKGYQVS GCTVVNNSTF LVKGGQVTF RQTK

```

(b)

```

1 MRNSLLISLA AAALAE GKAY SPPAYPAPWA SGAGEWAQAH DRAVEFVSQ L TLAEKINLTT
61 GVGWEGGC V GNTGSI PRLG FRSLC MQDSP LGVRD TDYNT AFPAGVNVAA TWDLNLAYQR
121 GVAMAEHRG KGV DVQLGPV AGPLGRAPEG GRNWEGFAPD PVLTGQMMAS TIQGMQDTGV
181 IACAKHYIGY EQEHFRQGSQ ENYTVADAI SNIDDVTLHE LYLWPFADAV RAGVGSIMCS
241 YNQLNNSYSC SNSYSLNHIL KGELDFQGFV MTDWSAQHSG VGDALAGADM DMPGDVAFDS
301 GTAFWGTNLT IAVLNGTVPE WRIDDMAVRI MSAFYKVGRD RTQVPINFAS WTLDTYGNEY
361 YYAGEGYK EI NQHVDVRGDH AKVVREIGSA SIVLLKNVDG ALPLTGSERF VAVFGEDAGS
421 NPDGVNGCSD RGCDNGTLAM GWGSGTANFP YLVTPEQAIQ AEVLKNGGTF TAITDSGATN
481 TTATTVAGQA SACIVFANAD SGEGYITVDG NVGDRKNLTL WQNGEAMISA VAGNCNNTIV
541 VLHTVGPVLV EDWVNHPNIT AVLWAGLPGE QSGNSLV DVL YGSVNP GGKT PFTWKGQRSD
601 WGTDILYEPN NGDGAPQDF TEGIFIDYRH FDKYNITPTY EFGYGLSYST FFSNLQVTP
661 LAASPYK PAT GKSGPAPVLG KVLNATAYLF PSSIKRIEAF IYPWLNSTD L RTSSGDPNYG
721 WSTSKYVPDG AQDGSPQPVN PAGGAPGGNP ALYDPVAEIS VTVKN TGKVA GIEVPQLYVS
781 LGGPSDAPKV LRGFGR LSLG AGE EAQWTTT LTRRDVS NWD TVSQNWVVS N YTKTVYVGN S
841 SRNLPLQKTL ALKIGK

```

**Figure S5.** Amino acid sequence of (a) Rhase-TS (Genebank accession no. **MT779018**) and (b) Gluase-TS (Genebank accession no. **MT779019**). The gene of Rhase-TS consists of 2442 bp, encoding 814 amino acids with the pI value predicted as 4.91 by ProtParam<sup>20</sup>, while the gene of Gluase-TS consists of 2568 bp, encoding 856 amino acid with the pI value calculated as 4.79. The signal peptides of Rhase-TS (first 22 residues) and Gluase-TS (first 19 residues) were predicted by SignalP-5.0 Server (<http://www.cbs.dtu.dk/services/SignalP/>). The predicted N-glycosylation sites by NetNGlyc 1.0 Server (<http://www.cbs.dtu.dk/-services/NetNGlyc/>) were marked by asterisks. Matched peptides of Rhase-TS and Gluase-TS in protein identification were shown in red color.

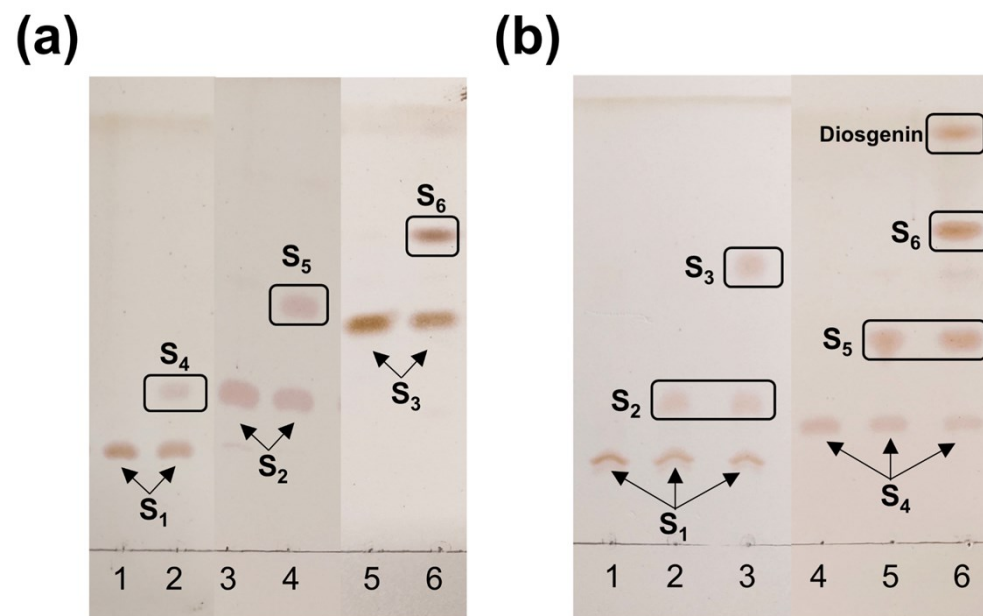

**Figure S6.** TLC chromatogram. **(a)**, lane 1: substrate  $S_1$ ; lane 2: hydrolysate ( $S_4$ ) from  $S_1$  by Rhase-TS; lane 3: substrate  $S_2$ ; lane 4: hydrolysate ( $S_5$ ) from  $S_2$  by Rhase-TS; lane 5: substrate  $S_3$ ; lane 6: hydrolysate ( $S_6$ ) from  $S_3$  by Rhase-TS; **(b)**, lane 1: substrate  $S_1$ ; lane 2: hydrolysate ( $S_2$ ) from  $S_1$  by Gluase-TS at 24 h; lane 3: hydrolysates ( $S_2$  and  $S_3$ ) from  $S_1$  by Gluase-TS at 24 h; lane 4: substrate  $S_4$ ; lane 5: hydrolysate ( $S_5$ ) from  $S_4$  by Gluase-TS at 24 h; lane 6: hydrolysates ( $S_5$ ,  $S_6$ , and Diosgenin) from  $S_4$  by Gluase-TS at 48 h.

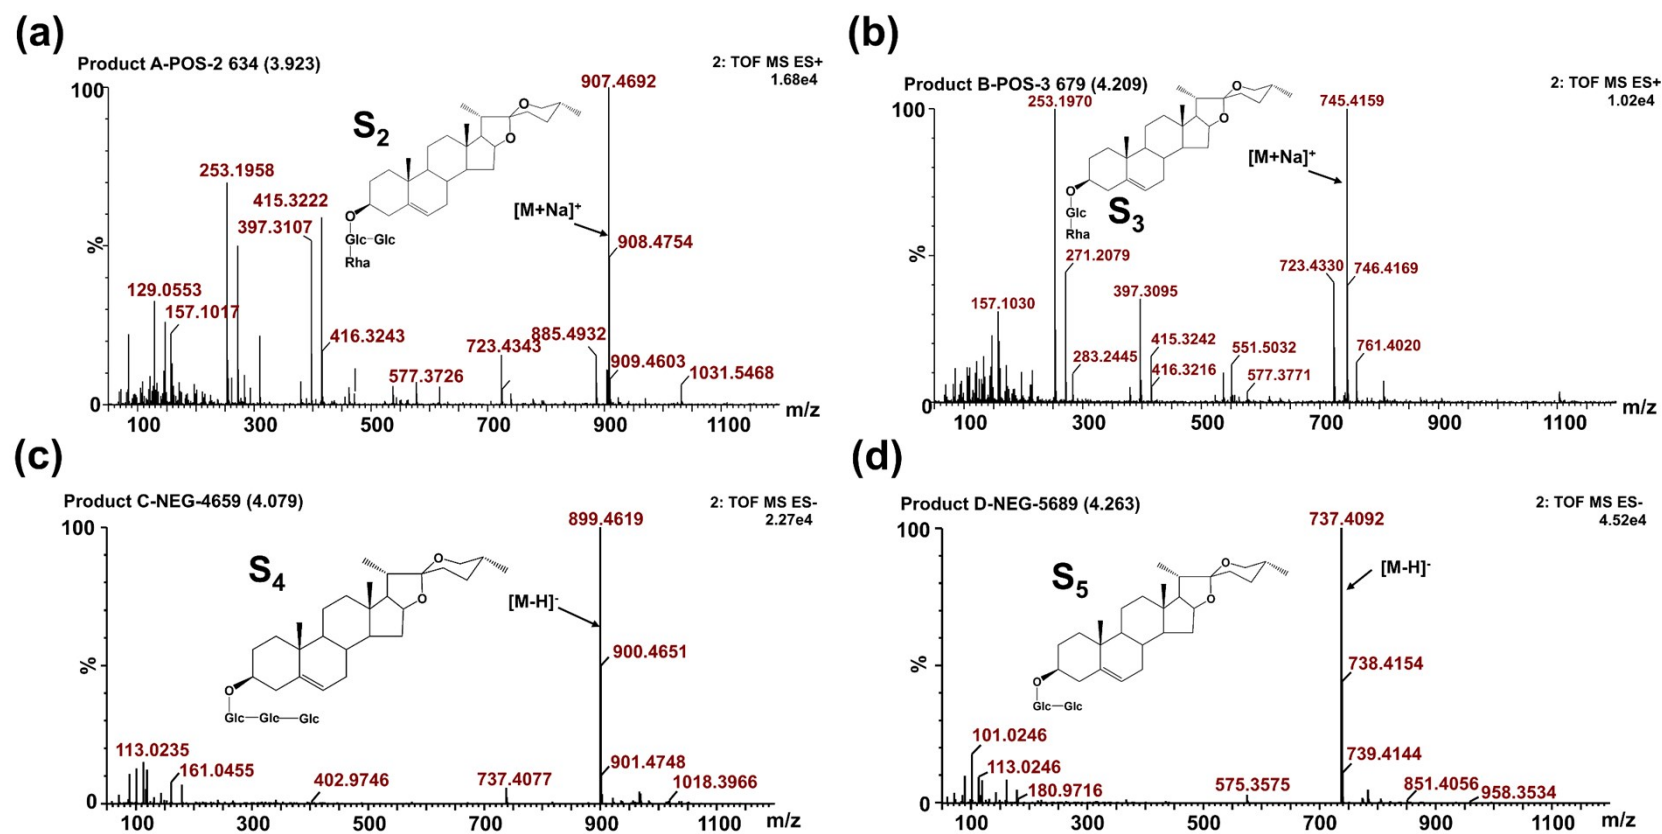

**Figure S7.** Secondary mass spectra of products from steroidal saponins. **(a)**, Product A from  $S_1$  by Gluase-TS,  $m/z$  907.47= $[M_w+Na]^+$ ,  $M_w=885.04$ . Product A was identified as deltonin ( $S_2$ ). **(b)**, Product B from  $S_1$  by Gluase-TS,  $m/z$  745.41= $[M_w+Na]^+$ ,  $M_w=722.90$ . Product B was identified as prosapogenin A ( $S_3$ ). **(c)**, Product C from  $S_1$  by Rhase-TS,  $m/z$  899.46= $[M_w-H]^-$ ,  $M_w=901.04$ . Product C was identified as diosgenin-triglucoside ( $S_4$ ). **(d)**, Product D from  $S_2$  by Rhase-TS,  $m/z$  737.41= $[M_w-H]^-$ ,  $M_w=738.88$ . The product D was identified as diosgenin-diglucoside ( $S_5$ ).

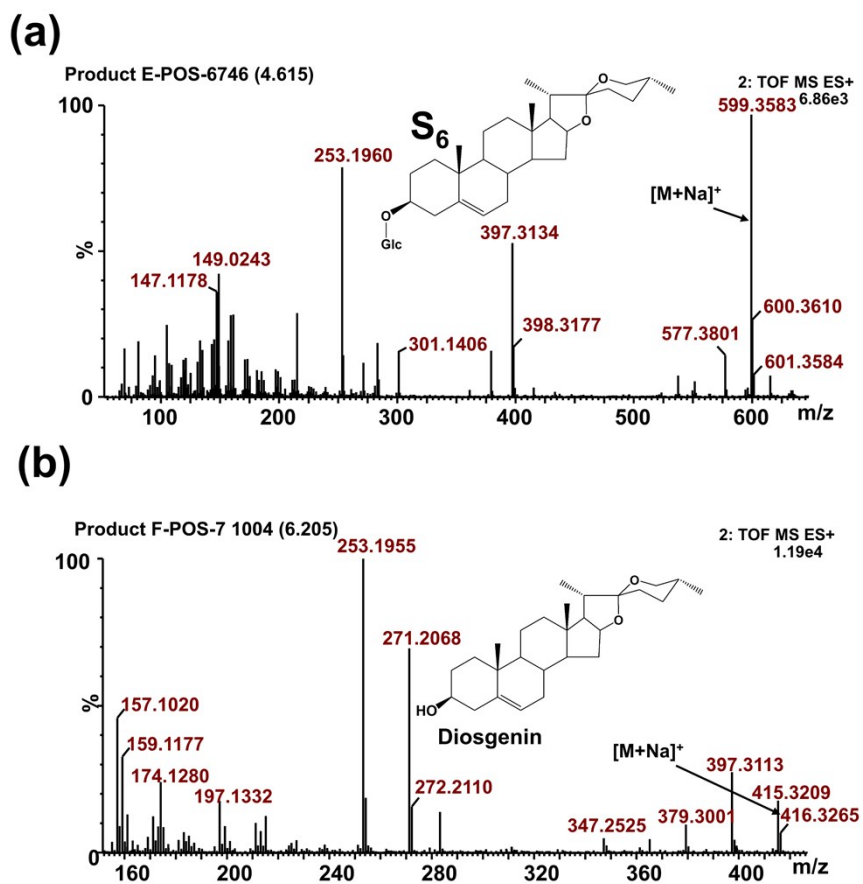

**Figure S8.** Secondary mass spectra of products from steroidal saponins. **(a)**, Product E from  $S_3$  by Rhase-TS,  $m/z$  599.36= $[M_w+Na]^+$ ,  $M_w$  576.76. Product E was identified as trillin ( $S_6$ ). **(b)**, Product F from E-DZW by Rhase-TS and Cel-TL4,  $m/z$  415.32= $[M_w+H]^+$ ,  $M_w$ =414.62. Product F was identified as diosgenin.



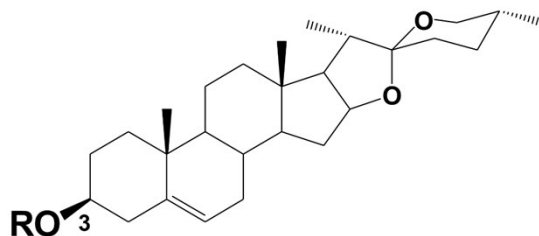

| R (C-3)                                                                                       | Name          |
|-----------------------------------------------------------------------------------------------|---------------|
| $\begin{array}{c} \text{—Glc}^{1,4} \text{—Rha} \\   \\ \text{1,2} \\ \text{Rha} \end{array}$ | Dioscin       |
| $\text{—Glc}^{1,4} \text{—Rha}$                                                               | Progenin II   |
| $\begin{array}{c} \text{—Glc}^{1,4} \text{—Ara} \\   \\ \text{1,2} \\ \text{Rha} \end{array}$ | Poliphyllin I |
| $\text{—Glc}^{1,4} \text{—Ara}$                                                               | Compound A    |
| $\text{—H}$                                                                                   | Diosgenin     |

**Figure S9.** Chemical structures of dioscin, progenin II, polyphyllin I, compound A (diosgenin-3-O- $\alpha$ -L-arabinofuranosyl-(1 $\rightarrow$ 4)- $\beta$ -D-glucopyranoside), and their aglycone (diosgenin).

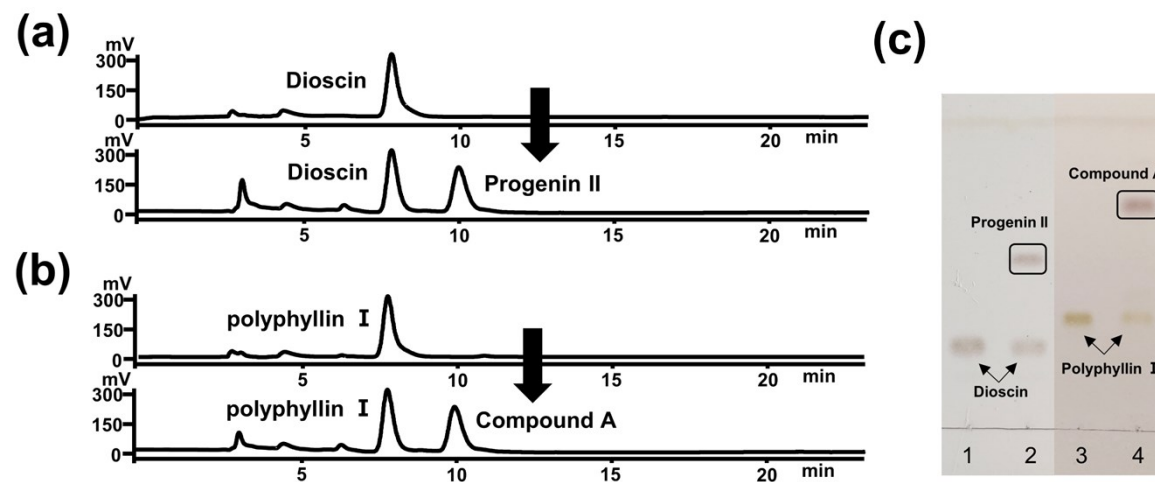

**Figure S10.** (a), HPLC chromatogram of dioscin hydrolyzation by Rhase-TS; (b), HPLC chromatogram of dioscin polyphyllin I hydrolyzation by Rhase-TS; reactions were carried out by incubating recombinant Rhase-TS (0.35 mg/mL, 10  $\mu$ L, specific activity: 141.3 U/mg against  $S_3$ ) with substrate (2 mM) in 2 mL 50 mM sodium phosphate buffer (pH 4.5) at 60  $^{\circ}$ C for 1 h. Compound A is diosgenin-3-O- $\alpha$ -L-arabinofuranosyl-(1 $\rightarrow$ 4)- $\beta$ -D-glucopyranoside. Rhase-TS could hydrolyze all substrates with the terminal 1,2-rhamnose released. (c), TLC chromatogram. lane 1: substrate dioscin; lane 2: hydrolysate (progenin II) from dioscin by Rhase-TS; lane 3: substrate polyphyllin I ; lane 4: hydrolysate (compound A, diosgenin-3-O- $\alpha$ -L-arabinofuranosyl-(1 $\rightarrow$ 4)- $\beta$ -D-glucopyranoside) from polyphyllin I by Rhase-TS.

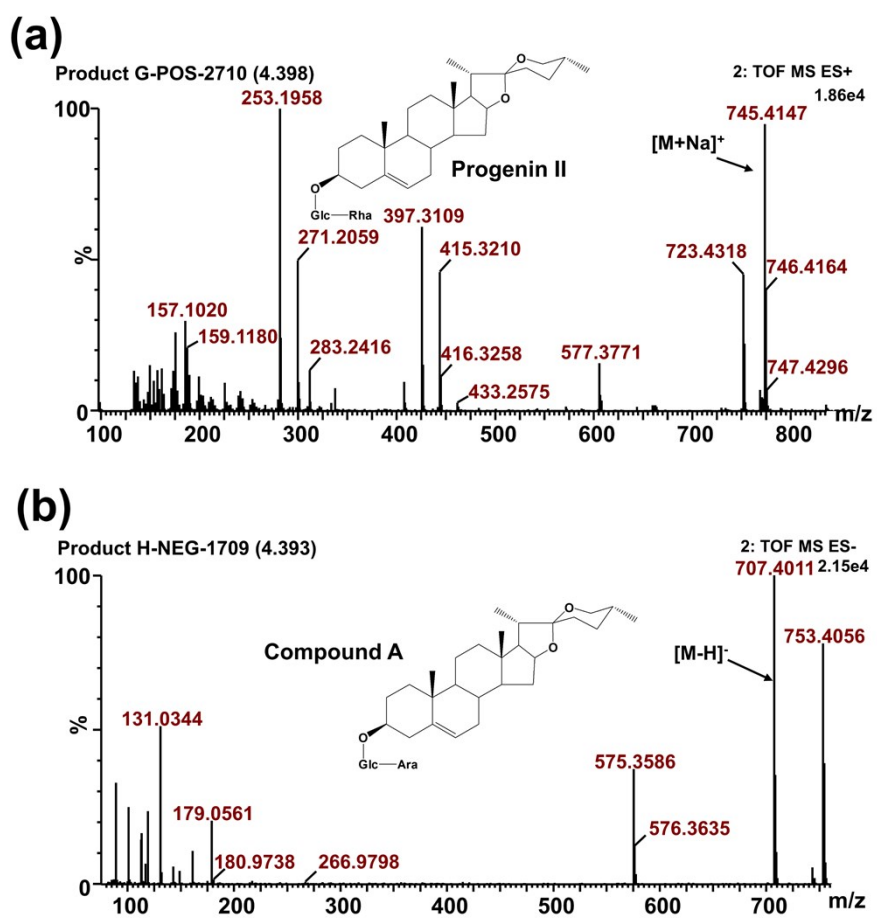

**Figure S11.** Secondary mass spectra of products from steroidal saponins. **(a)**, Product G from dioscin by Rhase-TS,  $m/z$  745.41= $[M_w+Na]^+$ ,  $M_w=722.9$ . Product G was identified as progenin II. **(b)**, Product H from polyphyllin I by Rhase-TS,  $m/z$  707.40= $[M_w-H]^-$ ,  $M_w=708.87$ . Product H was identified as diosgenin-3-O- $\alpha$ -L-arabinofuranosyl-(1 $\rightarrow$ 4)- $\beta$ -D-glucopyranoside (Compound A).

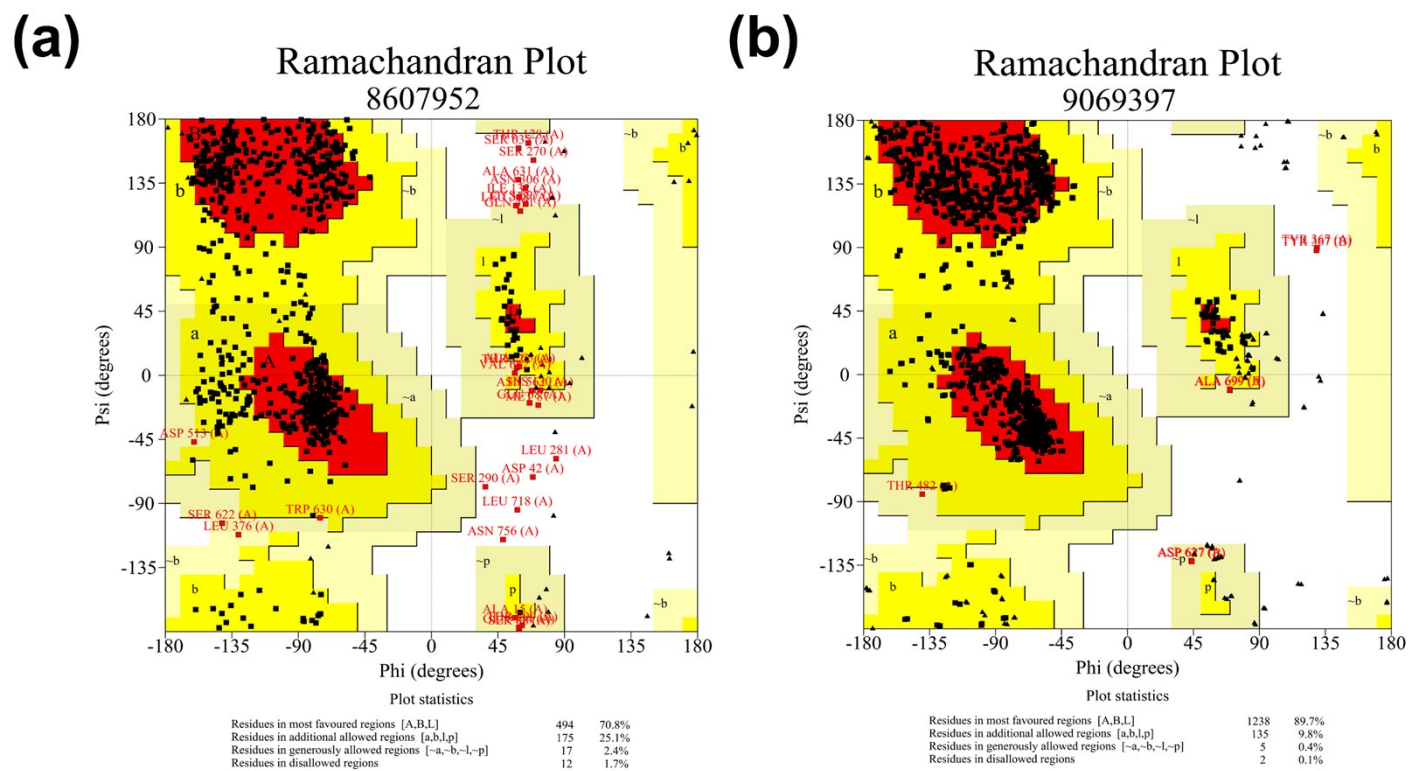

**Figure S12.** Ramachandran's plots of Rhase-TS and Gluase-TS models by PROCHECK<sup>21</sup>; the residue ratios in allowed regions of Rhase-TS and Gluase-TS models were 98.3% and 99.9%, respectively.

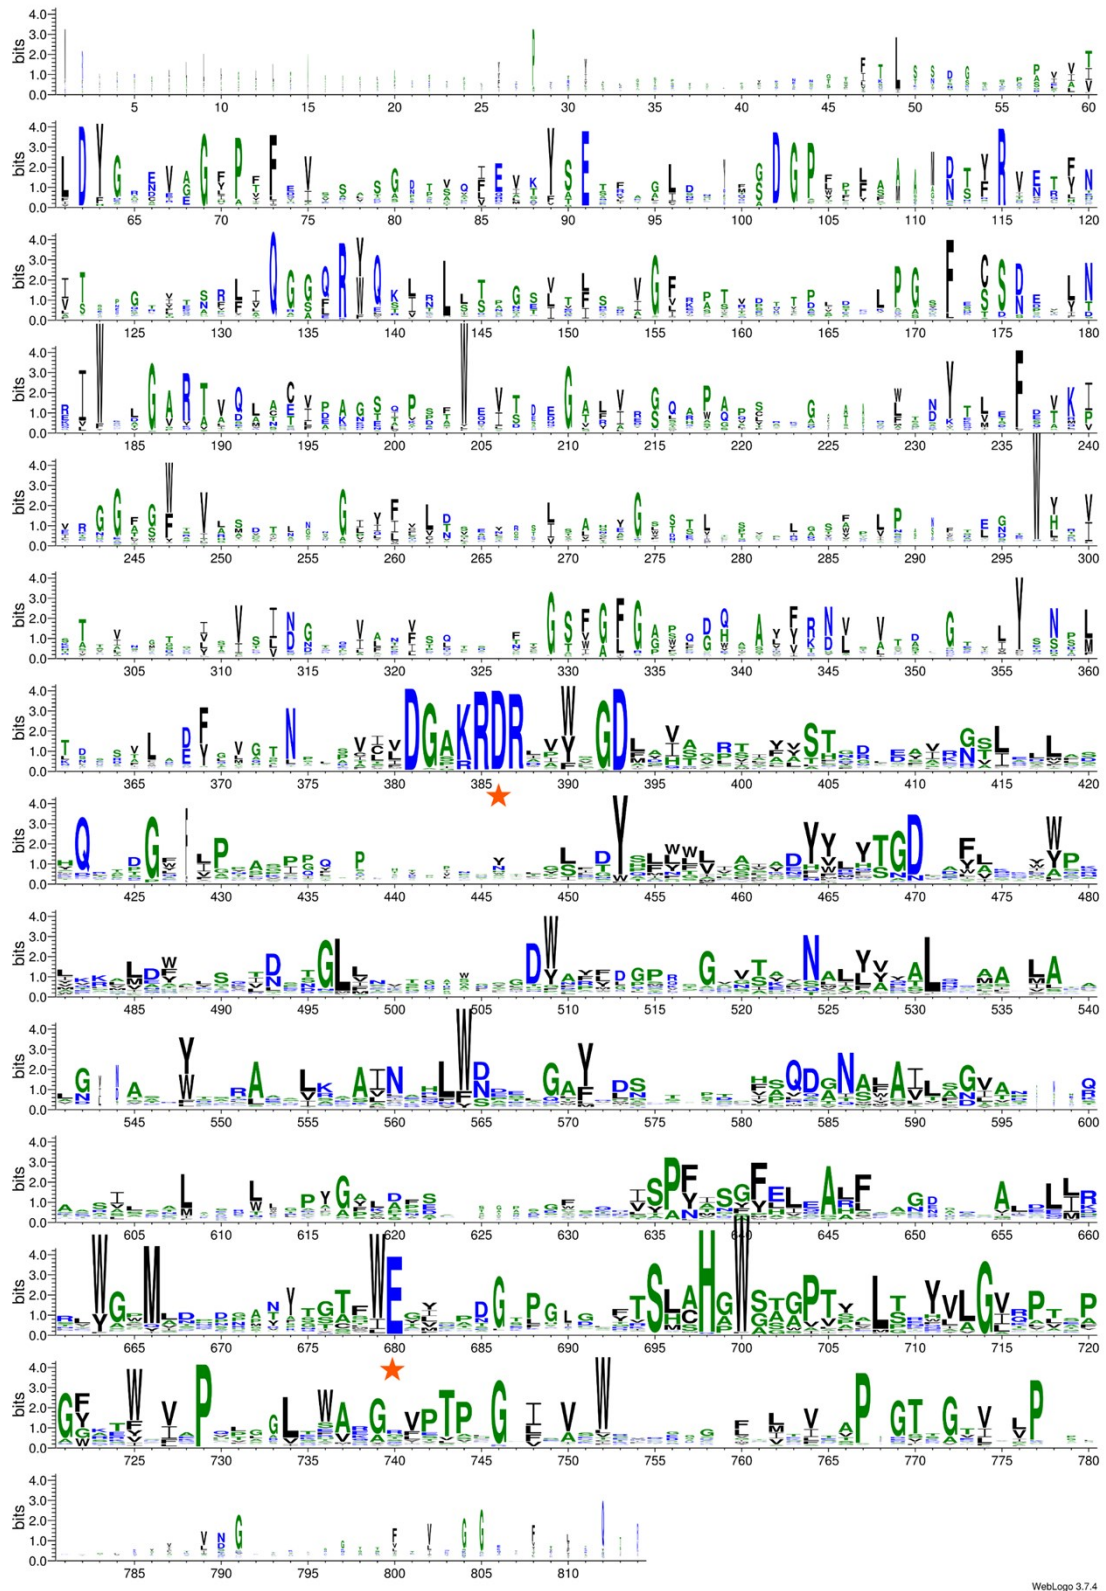

**Figure S13.** Sequence logo by WebLogo 3 using the homologous sequences of Rhase-TS obtained by Consensus Finder<sup>22</sup>. The putative catalytic residues, Asp 386 (nucleophile) and Glu 680 (acid/base), were marked as red asterisks.



**(a)**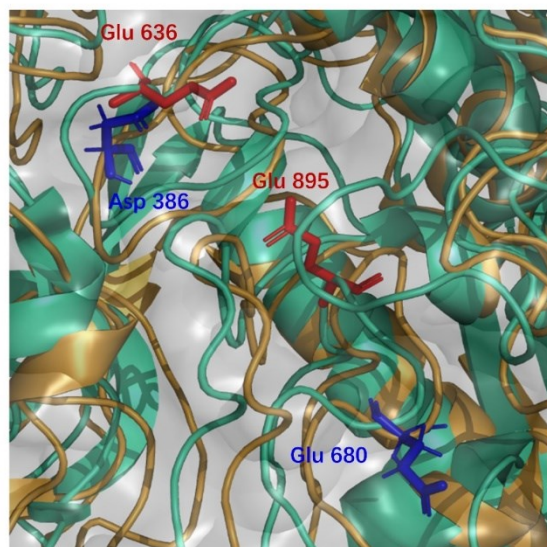**(b)**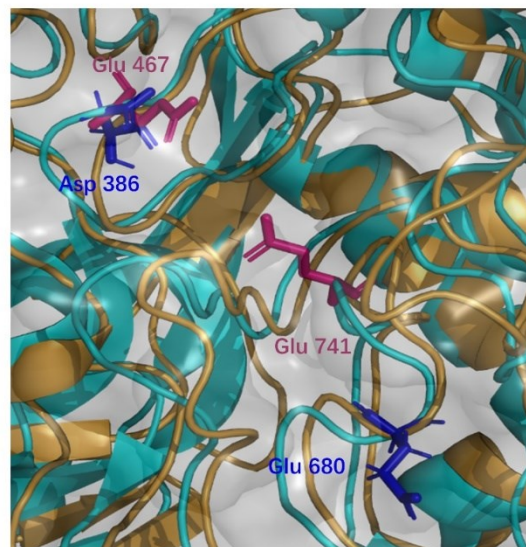**(c)**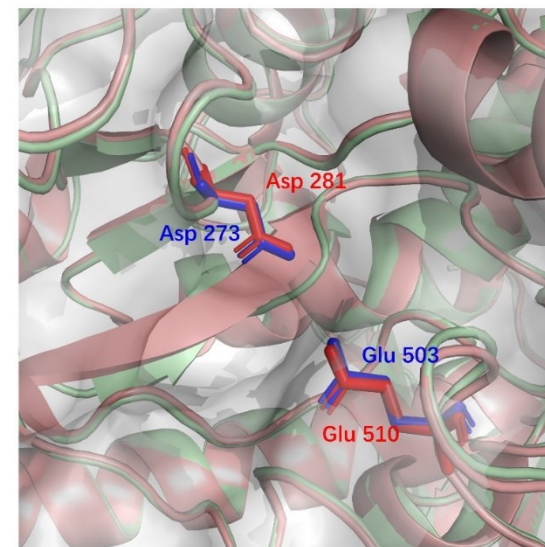

**Figure S15.** Structure superpositions of Rhase-TS and Gluase-TS models with templates in PyMol. **(a)**, Rhase-TS model and template (PDB ID:3w5m, 1.8 Å, Chain A)<sup>23</sup> showed a close structural similarity (TM-score: 0.893)<sup>24</sup> and were colored in yellow and green cyan, respectively. The catalytic residues of template (Glu636, Glu895) were displayed in red, and the putative catalytic residues of Rhase-TS (**Asp386**, **Glu680**) were displayed in blue. **(b)**, Rhase-TS model and template (PDB ID:6gsz, 1.38 Å, Chain A)<sup>25</sup> showed a close structural similarity (TM-score: 0.903) and were colored in yellow and cyan, respectively. The catalytic residues of template (Glu467, Glu741) were displayed in pink, and the putative catalytic residues of Rhase-TS (**Asp386**, **Glu680**) were displayed in blue. **(c)**, Gluase-TS model and template (PDB ID: 5FJI, 1.95 Å, Chain A)<sup>26</sup> were colored in green and salmon. The catalytic residues of template (Asp281, Glu510) were displayed in red, and the putative catalytic residues of Gluase-TS (**Asp273**, **Glu503**) were displayed in blue.

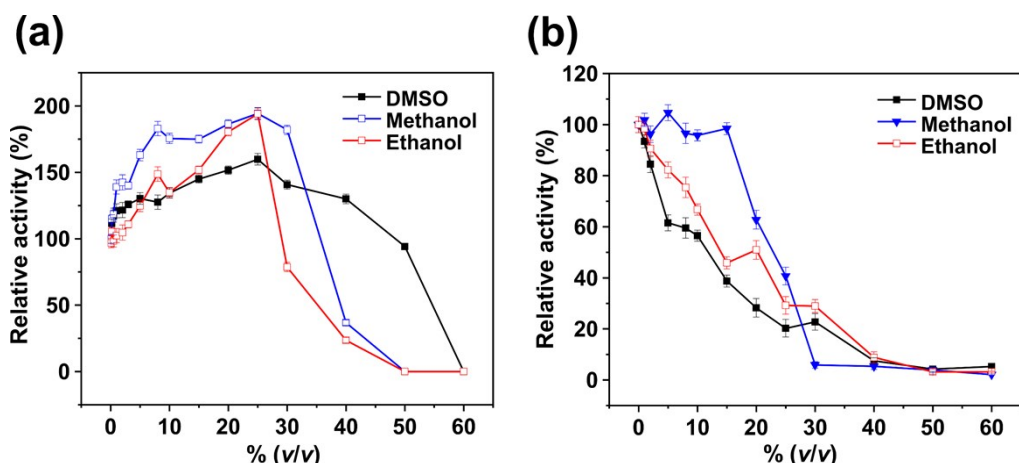

**Figure S16.** Effect of organic solvents (methanol, ethanol, and DMSO) on **(a)** Rhase-TS and **(b)** Gluase-TS. Relative activity was defined as the percentage of control. The improved activity of Rhase-TS at the concentration of organic solvents lower than 25% (v/v) (methanol, ethanol, and DMSO) might be attributed to the improvement of hydrophobic substrate's solubility, leading to the increase of matter-transferring frequency between substrate and enzyme. Gluase-TS could be more stable in methanol than in DMSO or ethanol at a concentration of lower than 25% (v/v).

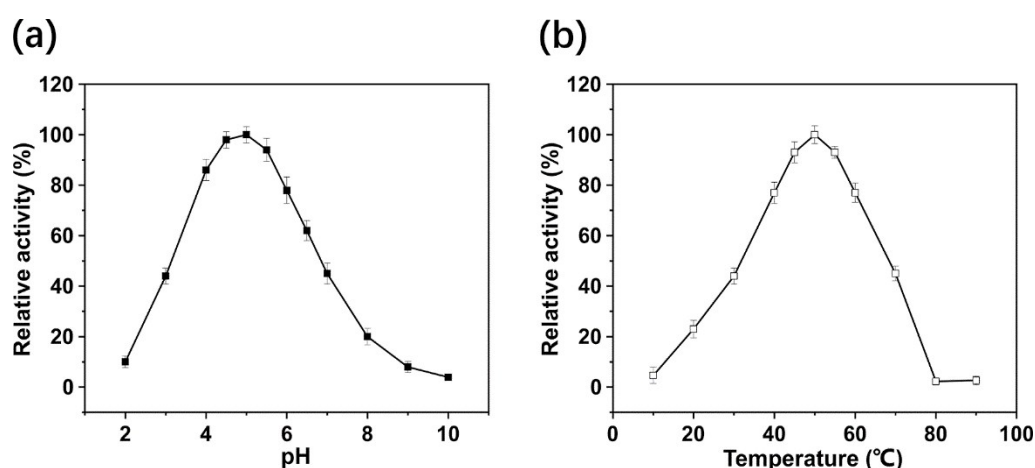

**Figure S17.** **(a)**, Effect of temperature on Cel-TL4 (optimum temperature: 50 °C). **(b)**, Effect of pH on Cel-TL4 (optimum pH: 5.0). Activity assay of Cel-TL4 was measured by using trillin ( $S_6$ ) as substrate. One unit (U) was defined as the amount of enzyme required to generate 1  $\mu\text{mol}$  diosgenin per hour. Relative activity was defined as the percentage of maximum activity of Cel-TL4. All assays were performed in triplicate.



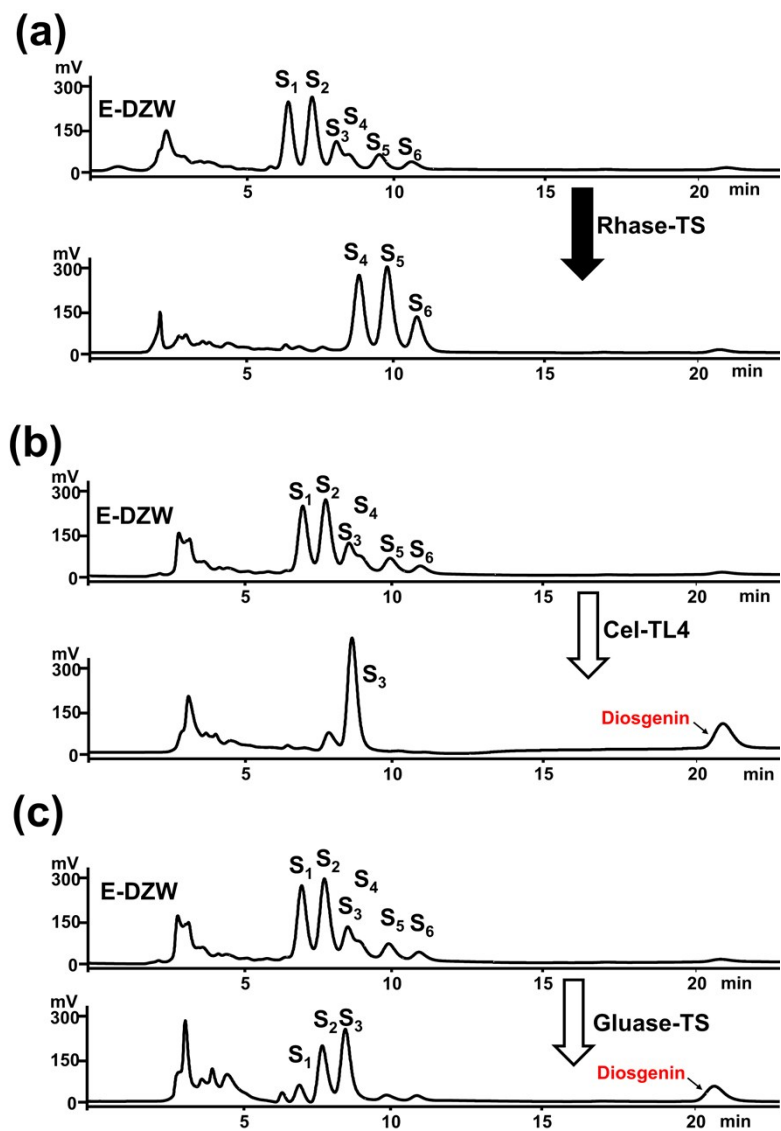

**Figure S18.** (a), HPLC chromatogram of E-DZW (10 mg) hydrolyzation by Rhase-TS (10  $\mu$ L, specific activity: 141.3 U/mg against S<sub>3</sub>) at pH 4.5, 60 °C. Substrate S<sub>1</sub>, S<sub>2</sub>, and S<sub>3</sub> in E-DZW were completely hydrolyzed into S<sub>4</sub>, S<sub>5</sub>, and S<sub>6</sub>, respectively, within 12 h. (b), HPLC chromatogram of E-DZW (10 mg) hydrolyzation by Cel-TL4 (0.2 mg, specific activity: 10.5 U/mg against S<sub>6</sub>) at pH 4.5, 50 °C for 24 h. Substrate S<sub>1</sub> and S<sub>2</sub> in E-DZW were almost hydrolyzed into S<sub>3</sub> (yield: 92.4%). Substrate S<sub>4</sub>, S<sub>5</sub>, and S<sub>6</sub> in E-DZW were completely hydrolyzed into diosgenin (yield: 15.8%). (c), HPLC chromatogram of E-DZW (10 mg) hydrolyzation by Gluase-TS (150  $\mu$ L, 1.35 mg/mL, specific activity: 1.4 U/mg against S<sub>6</sub>) at pH 4.5, 60 °C for 24 h with the yield of S<sub>3</sub> and diosgenin as 21.5% and 14.1%, respectively.

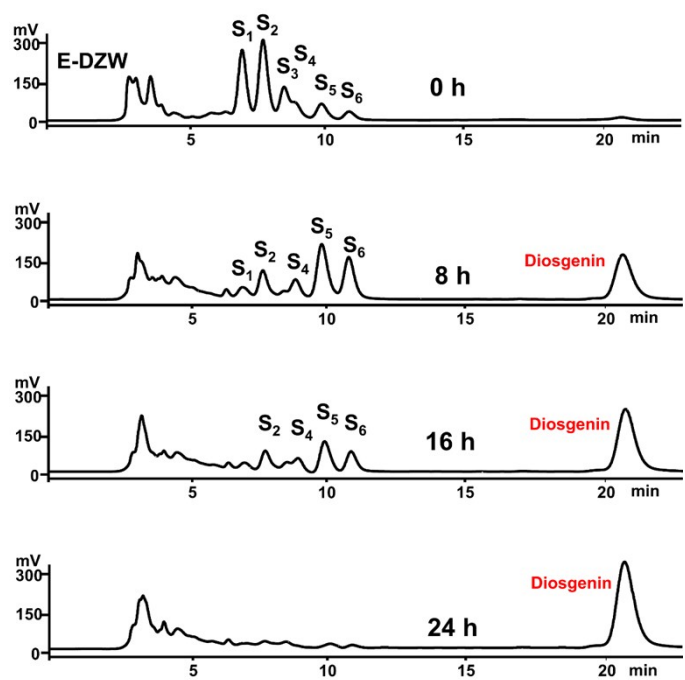

**Figure S19.** HPLC chromatogram of E-DZW (120 mg/mL) hydrolyzation by Rhase-TS and Cel-  
 TL4 at pH 5.0, 52 °C. Steroid saponins in E-DZW were almost hydrolyzed into diosgenin within 24  
 h with a yield of 96.5%.

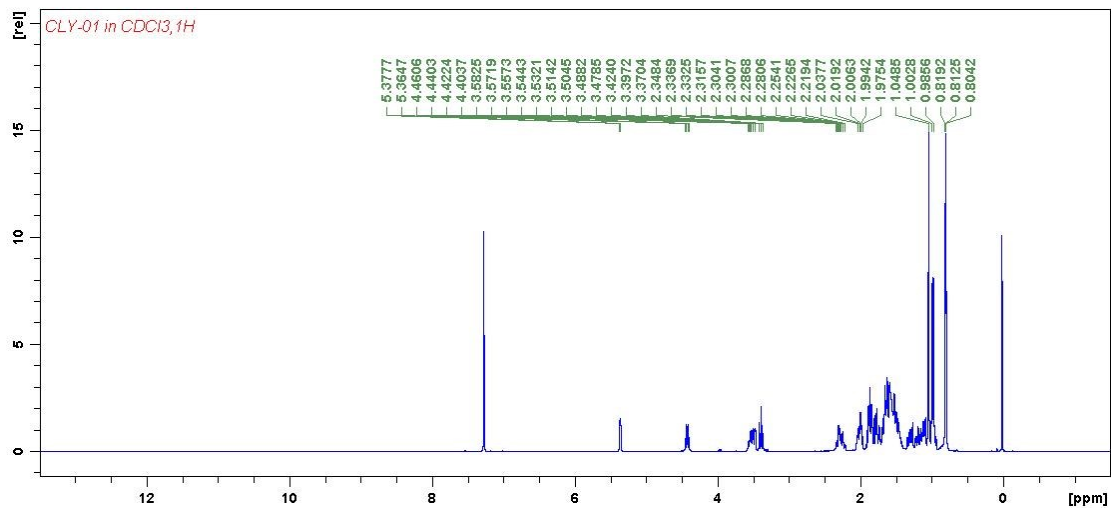

**Figure S20.** <sup>1</sup>H NMR spectrum of the final product (diosgenin).

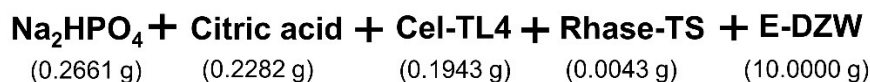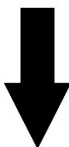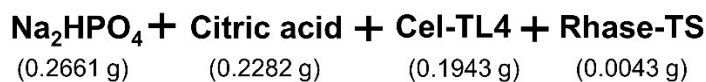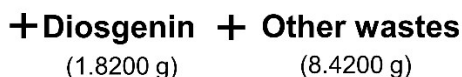

Total amount of reactants: 0.2661 g+0.2282 g+0.1943 g+0.0043 g+10.0000 g=10.6929 g

Amount of final product (diosgenin): 1.82 g

Amount of waste: 0.2661 g+0.2282 g+0.1943 g+0.0043 g+8.4200 g=9.1129 g

**E-Factor=Amount of waste/Amount of product=9.1129/1.8200=5.007**

**Figure S21.** E-factor calculation for the production of diosgenin by enzymatic catalysis.

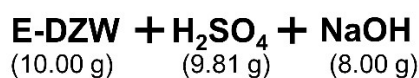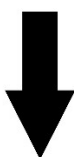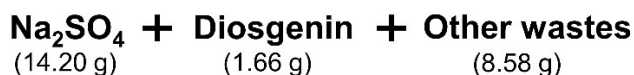

Total amount of reactants: 10.00 g+9.81 g+8.00 g=27.81 g

Amount of final product (diosgenin): 1.66 g

Amount of waste: 14.2 g+8.58 g=22.78 g

**E-Factor=Amount of waste/Amount of product=22.78/1.66=13.72**

**Figure S22.** E-factor calculation for the production of diosgenin by sulfuric acid hydrolysis.

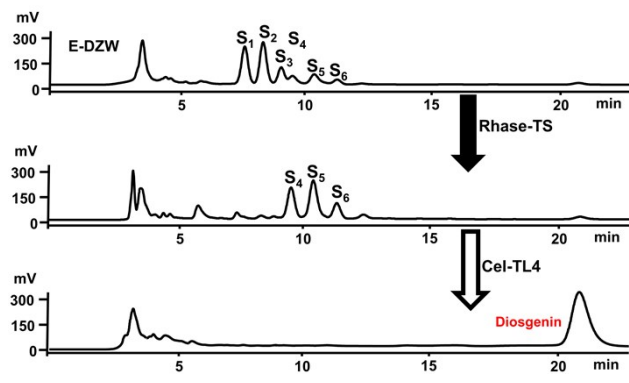

**Figure S23.** HPLC chromatogram of E-DZW hydrolyzation by two-step enzymatic hydrolysis. E-DZW was first hydrolyzed by Rhase-TS at pH 4.5, 60 °C for 10 h, and then hydrolyzed into diosgenin by Cel-TL4 at pH 5.0, 50 °C for 25 h with diosgenin yield of 98.5%.

## Reference

1. T. D. Bruns, T. J. White and J. W. Taylor, *Annu. Rev. Ecol. Syst.*, 1991, **22**, 525-564.
2. C. M. Visagie, Y. Hirooka, J. B. Tanney, E. Whitfield, K. Mwangi, M. Meijer, A. S. Amend, K. A. Seifert and R. A. Samson, *Stud. Mycol.*, 2014, **78**, 63-139.
3. A. D. Tekpinar and A. Kalmer, *Nova Hedwigia*, 2019, **109**, 187-224.
4. H. White, *Econometrica*, 1982, 1-25.
5. K. Tamura, G. Stecher, D. Peterson, A. Filipinski and S. Kumar, *Mol. Biol. Evol.*, 2013, **30**, 2725-2729.
6. R. M. Leggett, R. H. Ramirez-Gonzalez, B. J. Clavijo, D. Waite and R. P. Davey, *Front. Genet.*, 2013, **4**, 288.
7. A. M. Bolger, M. Lohse and B. Usadel, *Bioinformatics*, 2014, **30**, 2114-2120.
8. A. Bankevich, S. Nurk, D. Antipov, A. A. Gurevich, M. Dvorkin, A. S. Kulikov, V. M. Lesin, S. I. Nikolenko, S. Pham, A. D. Prjibelski, A. V. Pyshkin, A. V. Sirotkin, N. Vyahhi, G. Tesler, M. A. Alekseyev and P. A. Pevzner, *J. Comput. Biol.*, 2012, **19**, 455-477.
9. M. Boetzer and W. Pirovano, *Genome Biol.*, 2012, **13**, R56.
10. A. Massouras, K. Hens, C. Gubelmann, S. Uplekar, F. Decouttere, J. Rougemont, S. T. Cole and B. Deplancke, *Nat. Methods*, 2010, **7**, 485-486.
11. T. Seemann, *Bioinformatics*, 2014, **30**, 2068-2069.
12. S. F. Altschul, T. L. Madden, A. A. Schaffer, J. Zhang, Z. Zhang, W. Miller and D. J. Lipman, *Nucleic Acids Res.*, 1997, **25**, 3389-3402.
13. H. Katayama, T. Nagasu and Y. Oda, *Rapid Commun. Mass Spectrom.*, 2001, **15**, 1416-1421.
14. L. Cheng, H. Zhang, H. Liang, X. Sun, X. Shen, J. Wang, W. Wang, Q. Yuan, H.-I. Ri and T.-M. Kim, *Process Biochem.*, 2020, **90**, 81-88.
15. Y. Fu, C. Li, J. Zhu, L. Zhang, Y. Wang, Q. Chen, L. Xu, S. Zhang, Y. Fang and T. Liu, *Biochem. Syst. Ecol.*, 2020, **93**, 104186.

16. L. Xian, F. Wang, X. Luo, Y. Feng and J. Feng, *PLoS One*, 2015, **10**, e0121531.
17. H. Yang, H. Yin, Y. Shen, G. Xia, B. Zhang, X. Wu, B. Cai and J. Tam, *J. Clean. Prod.*, 2016, **131**, 10-19.
18. Y. Chen, Y. Dong, Y. Chi, Q. He, H. Wu and Y. Ren, *Steroids*, 2018, **136**, 40-46.
19. L. Lei, W. Zhang, Z. Gao, L. Liu and X. Yu, *Eur. Food Res. Technol.*, 2018, **244**, 1447-1452.
20. E. Gasteiger, C. Hoogland, A. Gattiker, M. R. Wilkins, R. D. Appel and A. Bairoch, in *The proteomics protocols handbook*, Springer, 2005, pp. 571-607.
21. R. A. Laskowski, M. W. Macarthur, D. S. Moss and J. M. Thornton, *J. Appl. Crystallogr.*, 1993, **26**, 283-291.
22. B. J. Jones, C. N. E. Kan, C. Luo and R. J. Kazlauskas, *Methods Enzymol.*, 2020, **643**, 129-148.
23. Z. Fujimoto, A. Jackson, M. Michikawa, T. Maehara, M. Momma, B. Henrissat, H. J. Gilbert and S. Kaneko, *J. Biol. Chem.*, 2013, **288**, 12376-12385.
24. Y. Zhang and J. Skolnick, *Nucleic Acids Res.*, 2005, **33**, 2302-2309.
25. P. Pachel, J. Škerlová, D. Šimčíková, M. Kotik, A. Křenková, P. Mader, J. Brynda, J. Kapešová, V. Křen and Z. Otwinowski, *Acta Crystallogr. D*, 2018, **74**, 1078-1084.
26. J. Agirre, A. Ariza, W. A. Offen, J. P. Turkenburg, S. M. Roberts, S. McNicholas, P. V. Harris, B. McBrayer, J. Dohnalek and K. D. Cowtan, *Acta Crystallogr. D*, 2016, **72**, 254-265.
