# Supplementary material for: Efficient enzyme-catalyzed production of diosgenin: inspired by the biotransformation mechanisms of steroid saponins in Talaromyces stollii CLY-6
Source: Royal Society of Chemistry journal article supplement (doi:10.1039/d0gc04152a), 2021-01-01
Supplement: d0gc04152a2.pdf [file d0gc04152a2.pdf]

## Electronic Supplementary Information 2

### **Efficient Enzyme-catalyzed Production of Diosgenin: Inspired by the Revelation of Biotransformation Mechanisms of Steroid Saponins by *Talaromyces Stollii* CLY-6**

**Leiyu Cheng<sup>1,2</sup>, Han Zhang<sup>1</sup>, Haiyang Cui<sup>3</sup>, Mehdi D. Davari<sup>3</sup>, Bin Wei<sup>1</sup>,  
Wenya Wang<sup>1,2\*</sup>, Qipeng Yuan<sup>1\*</sup>**

<sup>1</sup>State Key Laboratory of Chemical Resource Engineering, College of Life Science and Technology, Beijing University of Chemical Technology, Beijing 100029, PR China; No.15 North Third Ring East Road, Chao yang District, Beijing 100029, P. R. China.

<sup>2</sup>Amoy-BUCT Industrial Bio-technovation Institute, Beijing University of Chemical Technology, Amoy, 361022, China; No.126 Xinyuan Road, Haicang District, Amoy 361028, P. R. China.

<sup>3</sup>Institute of Biotechnology, RWTH Aachen University, Worringerweg 3, Aachen 52074, Germany.

**\*Corresponding author.**

E-mail address:

Wangwy@mail.buct.edu.cn (Wenya Wang)

Yuanqp@mail.buct.edu.cn (Qipeng Yuan)

Fax: 010-64437610

Tel: 010-64421335

A total of **867** genes in *Talaromyces Stollii* CLY-6 were classified as carbohydrate-active enzymes (CAZy), and the detailed amino acid sequences were shown as follows:

>2899\_t gene=2899\_g

MMVKSFLLAALSALSALVQGHPSQERSLSERQSTDRLVFAHFMIGITSDRTSSADYDAD  
MQRKASYGIDAFALNIGVDPYTDQQLGYAYASAANNGMKVFISFDNWWHTSQATAIG  
QKIAQYASLPAQLMVDNKVVFSSFAGDGVDAALRSAAGSEFFAPNFHPSYGTDLNSV  
DGLLNWMAWPNNGNNAKAPDATGNVTVEQGDQYISALAGKAYIAPASPWFSTHFGPE  
VSYSKNWFPSDLLWYNRWEELLTLGPRFIEIVTWNDYGESHYVGPLESPTDDGASK  
WVNDMPHDGWLDFAKPFIAAFKAGATAVDSYITSELIYWYRPTPKDVDCDATDTCM  
DPNASNSSGNYFIGRPNGYQTMEDSVFVVSFLTAAAEEITVTSNTQTFQASAGASAFQV  
PMGVGTQTFVTRNGATVFQGTSLKQIINGCVCGLYNFNAYVGSPLAGFSDPLGPAGLA  
SLVQGLHVSTCAATPSLGTAPPVTTTSSVPTTTSSSSSTTTTSTTRSTTTTSTTTSTTT  
KTTSTTTSTSTSTSGTVCIAGTGPNGYVGLCSFCCNYGYCPPGPCTCTAYGAPVPTPPVT  
GTVGVPLSNEDNSYLGLCSFACNHGYCPSTACMVA

>2921\_t gene=2921\_g

MHVTSLYVLLAISWLARLAQSAGRNRSTSGTSDVWDRGTFANPSSNARPKVRYWAPDA  
YIDEDRAKFDIEELASAGFGGFELISYQLYGDPTPGIYGQEVVDWGQYGFSAWKNMI  
GVFASAAAENGLNMDFALGPNQGAGVPVQDQTAPGLSTGLEYG YFNISGGQQYSGPLP  
DPDLSYSGRSPSYWVFPDTSASPATLVAAVAGHITRYSNNEIFLNQSTMIDLAMVKDG  
NVNFTVPGVFYDQWTLFSFWQRRTGQYESRQGLTNSYPLTNSGFIVDHFSAAGAQLSA  
QFMDQNAITAGDFETASMYAWEDSAELVAPLLWTDNFTQSFLSRRGYSPTTALPLFFTS  
YPARTFYDQPDQGGKYVNDYYQTLTECYLEYLQTFKLWAHSRGFQYSNPQYGFPIDF  
VAASSIADAPECESLEFNDNVDA YRQFAGGVNMAQARIMSSETGAHYGQSYSLTWPTL  
LLDVRSNHAGGVNLQVFHGPSYSGNYPNNTWPGYTAFIWEGYSGSHNVRQPSWPMYPS  
IIDQIARTNFVLQNGVPQIDLAIYRYSFSTGLGSLWSDQGLYDAGYTWNYISPANLELPTG  
TLTDGVLAAQGPSYKAILVDNESSMPPAAARHISSYANAGFPVIFIGTTPSSTPGNNITGD  
AYVNATIASILSNTNVKTVPSQSDVVSAL EELNVLFPVNTTFLTVHRWNATELTHYVYF  
YNQGAASTQIVTLQTGEGVPFLDSL TGRIERIAAYTQTSLTTSVEVSLTQNEIALIAIGPP  
DNFNIGSRLQTHAIPNPSLQANVTYGANSLVVKSFSGEMTINLSNSSTVNVAISNPPER  
QTLNIWNITIHGWEPTANIYDATNHTETIYQYDNFSGAAIGNWASIDPQLRNVSGIGYYR  
TTFEWDGSATDGAILATGPIFHTQAATLNGRALDPFELFDPWIDITENLEIGTNELEIQIAT  
TLQNRLLGLNYNIETSAAYANPPYPSRSGDYQTYGLGGPVVILPYAKAEIQVF

>2922\_t gene=2922\_g

MRGDQVLAAPVPAACCVRGPAATATTTSLDPTQTGITTCDEYYNVVTGDSCAAIENKY  
GITFAQLYEWNPAIGSNCQTLVVG YAVCVGVSS

>2938\_t gene=2938\_g

MKLSYSLLLPILALGNTVTASVIKREL CGYDQTSVGPYTFYTNLWGESSATSGWQCS  
GIDYHSGNEVSWHTVWDWAGGSSSVKSYSNIDYGF DWKQFSSISKIPTTWKWKYTGSN  
VVADVSYDIFTSPYGGPDSYEIMIWL GALGGAGPISSTGSPVATVNIAGAKWKLYKGNP  
TSWMVFSFVAETEQTNFNADLMDFFHYLIQHEGFPASQYVQHIASGTEPF DGTNAQLTT

TEYVISVN

>2939\_t gene=2939\_g

MYWKAILVGLAGLSTSVRADLAFGSCPSGYTITTYVQTIIVTPISQIASSAKAVVPATSTSV  
LPAPYSASTGIATPSATTLGSGETSSSVTSAQSSTYTSDSPVSQTLQDVQVPSIAPTASVISS  
STLVPPVSNPAPSVSSTSSSSQGSPSPSSSPAESPLGGIMHGQATSVDGGDVGTCMFST  
AGYTLPAAGVYGAALSVDNWDTSAYCGACVSVTGQDGKSVKLMIVNQCPGDCGLNHL  
LLPNGFTQLADLKVGRIDVDWEFVECDISSPLYLSTQSGSSKYWFSMQVNSNVPVKSL  
EVSTDGGNTWQATTRSEYNFFQNPSGFGVDYVDVRRITSATGGTIIVKNANSVGETRTDA  
TSNFS

>2972\_t gene=2972\_g

MTRLRIACAGLGRMGKRHALHFAEQTPRAHLVAVSSPDETELEWAHERLGPLGVTVYK  
NYDDMLKHEGLQAVVIASATTVHAEQAIKAMDADLHVLCEKPLSTSVEISQSVLDAAN  
RKPYLKVLCGFSRRFDASYRDAHTKMLAGTIGRPSVIRSQTCDKLDPSGFFVTYAQFSGG  
IFVDCSIHDIDLALWFYTEDGKSEPMVKSVSVAVGITAVEPDLRKYDDRDNVGLVEFND  
GRIAYFYASRMMAAGQEDSTEIIGTKGKLTVNTQPQINLVNIYEADGVRRELPHYFDRF  
RDAFVTEAREFTDCCLLDKPVPLKLEGAVQAVRIGYALQEALISGKKISFDEEGQRFERA  
AL

>3068\_t gene=3068\_g

MSFTFKEKGNLFDKGDYAGAEEMYSQAIQMNPKEPSFTNRAVTRLRLEKWAGAEQD  
ARIAIDLHGSKAAASLKSSLYLAQALLELQRPQEAYDVAIDAYRASLSAMNAQTENLS  
KIVLRAKQIWAAKETARLREMDGTLASVESLIEADLERELKELKKQLDSGEIGEIGYNE  
DQKALRDEAEKKIQHVRDAFKAASGGQIAERVVPDYLDNITFEVMHDPVLTISGHSYD  
RLGITKYLEQAHVDPVTRAPMTVKDLRPNYSLKAACEEFLDKNGWAVDY

>3074\_t gene=3074\_g

MSSQAETGLTLAGRYLVPFFLLSFLWRKLVNDNVQKPYLDEVFHVGGQAQTYWRHDW  
FNWDPKITTTPGLYLSYLDCTGRSLLKGSSEEVNVVDLRSTNSIAAAFILPWRLQTL  
VLRKEQNTRAAGAWLSHTVLNCLFPPLFFSGLYTDILALIVVIQAYIWDTERSANG  
QKKTAVEALRGHVSFKTLAFISIGIALVFRQTNIFWVSVFMGGLQAVRTIRQNTKSCGY  
TGPLEIMLKSFAELYDPLVEEASFADYFKTGLSLGCAALSELPLVVASIIPHLIVLGA  
AFVLWNGSVVLGHKEFHITAGIHLPMQMLYIWPYFVFFSPLISIGVLNAVPPRRFIPKYLDY  
NLSNAHRLPSILTALAVIPLMLAAVHFNTVHPFTLADNRHYVFYIFRLLTRVHPAVKYA  
VVPVYFLCAWAVLTAFGIFSPAAPKPPPIQIATPQEAFFSSSKIQNPSKKQEKEAKKQKK  
QTTKSNANKQSPSAAAASKQDQQTQVLTPEILAKIQAHVAIQQQRENQQVRVSFVLI  
WLIATASLITAPLVEPRYFIIPWVIWRIHLRQPTPEIFKRERQSTFRAQVFTALPEIMETI  
WFLIINAVTGYVFLYKGFEPQEPGKVQRFLW

>3105\_t gene=3105\_g

MMWATAGLLLTLCASTTRAWPYDSDLTHYNLNENQTANTPADYWGTPNHEYFSPD  
NWRVPIYSLFLDRFVNGDPTNDNINGTYEHDLDSTQMRHGGDVVGLVDTLDYLQGM  
GIKAIYLAGTALMNQPWGFYDGYSDTLLDQHYGDIATWRSATEIHNRMGYVIFDNT  
LATMGDLIGFEGYLNTPFKYEEHKVEYKSPRQYVDFHFGNDYNTTCDYPRFYNETGY  
PVDSYVYDDLKGCYNSDFDQYGDVEAFGVFPDYQRELAKFASVQDRLEWNPVSRERL  
IRHACIIASLDVDGFRYDKATQATVDALGDMSDGWRQCARAHGKENFFLSGEITGGNN  
FGSIYLGRGRQPDMPDNVQDAILMTNESSDKYFIRQDGGQAIDGAAFHYTVYRTLTRF  
LGLDGNLAAGYDLPPDWVTMWNLMLLSNMNVNANTGKFDPRHLYGTTNQDVFRWPA

IQNGTEKMLLGMFITTLHMPGAPLVLWGEEQGFYILDATADNYVYGRQSMSPATAWWS  
HGCRYVNVYQYYQFPLESALNGCEDISVYDHRDPAHPLRNILKHMFMQRQFPVLND  
GYLLQSLSKQTHNVYLPGSNGTPTETGMWSVLRGRFEGIQDLTNNQSVWLLYQNDNTTI  
NYKFDCSSQNTNLSLIAPFDANTTVKNLFYQYDEQTLKSSPVKLGLEGSTNYNGCLDNL  
MVPWDFRAYVPKSKWVGYPYMITFQPGHDARILSSVRPDQAESVPIQIYFSEQMDCNS  
VTNSILLNSTTETKQTATLNSSSVSCQNINDGTTNFIGEIASAWVWKATLDNVYNGIHRIT  
IANASSVDGTATNAIDHFLLRVGQHDNPMIFNSANYSTSLHKKDDNGTLYVQHHAAGA  
DMWRYSTNWGSSFSWLPYTGNDTITELPWSGTSLQGWGSHVRVEYFNKLSGSSDY  
VQEGSDWESSFRRFPHLFWNGPYNQYGFDAGLKNEMIQDSNDGLWKVKFLTEWPA  
QGQVSIWGINPDGQPDQGFVFGDADGDSVLDRLPSSLSAVTINITHPPSSYLWWEIRIH  
DGTQRFELLPVGSANIQIVLFCFMIVPILSASFGIWLFMKSFYRVKFNQVGVTEKTHILPL  
ALRRRLKRARLDGIEVRNPFLRLANRSGFLQTTSAFAGATSGERRRMVMATMEYDIED  
WAIKIKIGGLGVMAQLMGKNLSHQDLI WVPCVGDVEYPEDQPAEPMFVTVLGNSYEV  
KVQYHVLNRNITYVLLDAPVFRQQTKEPYPARMDDLDSAIYSAWNQICAEAMKRFPID  
LYHINDYHGSLAPLYLLPHTIPACLSLHNAEFQGLWPMRTQNERDEVCSVFNLDVNIATR  
YVQFGEVFNLLHAGASYLRVHQQGFAGVGVSKKYGKRSYARYPIFWGLKKVGNLNP  
DPSDTADWDKSVPNESDFTVDQDFEAGRVELKRQAQEWAGLDQNPEADLLVFVGRWS  
MQKGIDLIADIMPSVLEARNVQLICIGPVIDLYGKFAALKLDRMMKLYPGRVFSRPQFT  
ALPPFIFSGAEFALIPSRDEPFGLVAVEFGRKGALGIGARVGGLGQMPGWWYTVESTTTS  
HLLHQFKLAIDGALNSKVKVRAEMRARSQKRFVPAQWIEDLEILQSTSIRIHTRETIKSN  
GQISTPTGYTYPNEAISTPLYLPISGHHLGHTPPPIESGNMGYSSLRQSSLGPQRNTIVY  
SRDPSPDGDERRASNLFQSLGVRAGPGHTAVIERRNRLRRKIHVAASEDITDSEREGD  
ETEDENLHSYFTEDEFTMTPEHADMSRRMVDEHGPPSPVHLLNANQVNGHYYPYIPGSP  
GFSEGDDSLAPTRPFATAPNRLSNSSVLSFDSVVGDKKNFKLQKVDPFFTDATGEFYRIF  
EKKLEDLNGSNSDGLCIEEFLVKSEKKWYDRFRAARLGRDWSVPVSIKKGKILTPTNS  
ISNGDSNSDIHGGDEFFLGEDYEPPTGLKKWMQLRIGDWPLYSLFLGLGQIIAANSYQV  
TLLTGQIGQTPKLYAIATTYLITSIAWWCVFRSFKSVVALSTPWWFFYGLAFLGIAHFEH  
NSVNREWIQNFASGVYATASASGSIFSLNFGDESAAPVKDWVFRACLIQGTQQLYVVA  
LWYWGSSSLKQTQAGLTVNQPINSWKITAITVPIAVMLWAIGILLAFGLPDYYRQTPGK  
VASFYKSIFRRKIIMWFFVTVLIQNFFLSAPYGRNWSFLWSSQHASTWQIVLLVALFFVFW  
WGILLGIMFFLSKSHSWILPVFAIGLGAPRWAQIWWGTSNLGQYIPWAGSFVSGALVSR  
LWLWLGVLDSLQGVFGMILLQTLTRLHICFVLLGAQVLGSIATIVARAAAPNKIGPGDI  
SPDIGTEVSSLWTAWFVWGLSFQLLICAGFFMFRKEQLHKP

>3115\_t gene=3115\_g

MPRHWSETVDWIWASKWDESRDVARIVQFRRSFALESVPSECLIHVSADTRYRFYVNGR  
SVCFGPAKSHLGEWNYETVDIAPFCNVGSNTIAMRVLRYS AHFPGNMSLTRAIPGVIVH  
SDVVPEVGTNSSWRWKIDEAVRIGSTSAWDPNLGPVLLSINEDVDGSKQDLWVQPNF  
DDGTWLPVAVKATMKAPMLPILDQRR LAKRSIPLLPETQARFLKTVKCDADTPSFQDN  
QLIRHDQPLKIEAGRKVTAVF AAEMYTTGFICLQMRQGAGAKIRIRCAECFEQPSATPNP  
FARIKTDRTDVAGVLMGKDDYYTCRRETPSDVVVYEPFWFRFRYVELEIETQPSSPLE  
LLQLTFRETHYPLEKTTQITKFPSVEESNLWDISINTLRNCMHETYEDCPFYEQNQFGMD  
SRLQILFTYQLSNDRLARKCMQEFHSSRRSDGLVETHFPSPLPGVNIPYFSLYWIFMVY  
DHMMYFGDETLVRRYLGTIDGILDHFHQRIDDSNKL VGRMAWDAWLFVDWTQQWSD  
PGPDHDFRNLAVPPAYARTGFMTYSSLIYSLTLQRAAHLCDFVGRRTATEYRQRAIQL

NAAVMKHCFRGLIDGPDSPPEERSQHTQVFAVLCGALKGETARTVLRHALTNSSFVR  
CSYAMSFYVFEAVRKAGLYEELRSTLLEPWRDMVRQNLSTWAESAAMPDSDCHAWSS  
VPIHDFVTNVAGLAPAAPGFKSIRLEPRRELWKEMSGTFAVGKGSIAMSWSPGEPVELVP  
SFDTDVEVFDRSGSTLYNVKSGTTLRFDI

>3128\_t gene=3128\_g

MRLTSTLLTGFLATLWVAAPTAFFRMPCPGRLVDERADPIVSPGAISGHVHSIAGGNF  
GFNMTYEDARASSCSSPIKADLSNYWVPHLYYRAQNGTFVEVPVSGDGAGNLGGITV  
YYLQRPGANNDPLKAFPEGFRMLAGDPFRNYTGDFAAQGVSYACLDYNGPAKPETNG  
FPDYNCPDGLRAQVFFPSCWDGVNLDADHKSHMSYPISGAYNDGVCPTHVHLVSIF  
YEIIFQTNLFADQWWDTTQPFVWAMGDPTGYGFHGDVNGWDVDTLQYAVDNCLNDS  
GLISDCLAADGSEHFDLFTNEESQFCTLPAFVDETIGPVVEALPGCNPVTYGPEEATPSKC  
NSDKTVISDAVLANYTDVTQSLGWEYTGCAFDSSISTRITLDGSNESKDDMTVETCINFC  
AAGYSYAGLEYSTQCYCGNSIAAANAPIAGVVGCLFPCGGNSTQMCSSAALSIVYHK  
CAGSSCANANIGVIEGAASVAASAAAGSSATATATSAASAVSSGSSTGATATAVATTV  
AATSATATAVANVVSSKTTSVGATSVVPVAPATVVVTGGEEVVQVTSTITKGVTHWKT  
TVTVPGPTVTVTVTVT

>3135\_t gene=3135\_g

MSSQLLIEIPSVEQHSTGFGIGTATPRLSWRFLTTADSGLYDWKQNAEYEVHIVRSESQDEI  
YHVTSNESVLPWPSTPLQSRESAQIRVRAYGCNAANDKAEPTAWSPWRTIECGLLDRS  
DWIARPIASSSEPPDGLRPLRFRREFRISATTAVKKARLYITSLGIYRAFVNGHLVGDQ  
CLAPGWTSYRHLNYQVFDVASLLNAEGSNILAVEVAEGWYATRLGFRGGRRQLYGD  
RLAALAQLEIHVGHGGDKFTLCTDSTWCTPSAIVRSELYDGEIYDAREEDASWNWRS  
EPFVDASGWNVPQEIDFPTATLVASDAPPWRITEEITPISVQKTPSGATILDFGQNLVGR  
VSSLKQPSGSRVFSIHAEVLENGELGIRPLRHAKCTDEIILNGTEIVDWSPQYTFHGFYV  
QVNGWDEERDGSLLVNITALVMHTDMTRSGWFSCSHPMINKLHDNAWWSMRGNFLSI  
PTDCPQRDERLGTGDIQVFCPSANFLYNTAGMLGGWLQDVAAEQLKEKDGCVPFV  
PNVISEELWPHTPQAVWDDVVILTPWALYLSYGDRDILSRQHESMLAWIDRGIRRGSDG  
LWDPDLWQLGDWLDPAAPPVEPGDARTSGTLVADAYLVHVTYVMSEISKILDQEQDAI  
RFKADYDRLKAKFQAKYIAASGLLVGDTQTALSLAIMYDLHSTSEQAKAAASRLVQLV  
RQAKFRVATGFAGTPIITHALTKSGYPQIAYRMLQEKNRPSWMPITMGATTVWERWD  
SMLPDGSINPGEMTSFNHYALGSVINWLHSTVAGVSPLSAGWKQIKVAPIPGGTIDS  
AEAKYDTPYGRLECRWSIENEADIFNMALLIPPNTSALVMLPNTTEKMMKHTVSQE  
DEGQWV GSGHHSFSIPFKWGDYSSEWPPKPLIPIMRRPEPDNIA

>3147\_t gene=3147\_g

MGRHEEIVKEISRVVSQFHKLNPYRIFHGSTNSTRPRPGSTQNFVDISKLNVLVRDRST  
KTAAVEPNVPMDRLEATLKHGLVPPVMEFPGITAGGGYAGTSGESSFRHGFFDRTI  
NSVEMVLANGEVVKTSRDEKKDLFRGAAGAVGSLGITLIELNLVEAKKFKVVTYERKP  
TIKAAIEALEKDSANPDTAPFEYIDGIQFSPDHGVVKGELTDEL PANVKPQTFSNPWPDP  
FYLVHVEITKQELVTEYVPLAEYLFYDRGGFWVGASAFKYFRFVFNKFTRWFLDDF  
LHTRMLYKALHASGESNRYIVQDLALPYETAEEFVDYTTKTFDIWPLWYCPKQSPPT  
MHPHNTETKHAGRLNIGLWGFPAESTEFVAKNRDLEHKLNDLGGMKWLYAHTYYP  
EDEFWKRFRKWEGLREKYAATGLPSVWHKVRVATASSKSSKGLVSYWPIGGFWGI  
WKAIASKEYLKHNRNATWRTRK

>3188\_t gene=3188\_g

MESKKKNSSNAGSVLLISILIRRKVVKKQPAAPPKPHSLANIPPEQLPQYIQELLATVP  
HCILQSDVDAFQRAVDGSWAQQNREIIECVLRPRDHELKIVSILKKEHDRRSLAGSQ  
VESFFSVRNGGVNPGLGASTVQGGAVVDLDFNEITPAPDGVSTVTLGTGSKWINVYKFL  
DEKGLIVMGRNAPVGVGGLTLQGNILRVQFQSYMWADFDKSTKLTIRNEGRISFYSPK  
YGFVCSNCVSHEVLLADGKVVTASASENSDLWKVMKGGGNNFGIMTRFTLRFCFPSAPL  
WTSGIVTLAAFQYAKSLKAFNDYLAHTSSGKPGAFDEDAASPILSFIFIQKLGFIQITLSIL  
YTKVPEDKKWPAHW DATGFKSLRSIRKDRVETNTSVVERFGGFASAGTRHVQGTTRIRN  
DLETMKNAY AIFCETATDLRRVKGLIFPFVQAILPGWMNKGDPNIGLENCTEPLIINY  
SASWINAEDDDFVRSTIRSLERIEAATEARKTGHR YRFINYCM EWQRRYEGCGEENLK  
LMREASHRYDPTGLFQSGRAGGFKLDIQ

>3229\_t gene=3229\_g

MSQHRQLSTPRRQSRRLSSFDELEKIYDFGSNSSVQTVITIYGANNTPYIYMG TISGNPQR  
RDTQLMMPGSTDTPSYIVLEWEMNPNPVWPMHCHMSTHVSGGLIINILEQPSYIKQMNI  
PKTISQTCKDWAYFAGHDYVDQIDLGV

>3249\_t gene=3249\_g

MAPPHLQAESDVNVSSLPSSVDPRILQSMDFVVSFYEEVLAKLKP THEVPIEEVRANPSQ  
YAAVWAYDSKDEPRIRDY EIESKDGALVPIRCYYPDPATFGPGLYSVHINFHGGGFIFGS  
LQADSKFCLTLRDRLSLVIVDVNYRHCPETIMGKNVEDAWAALSWVRDESVKLNVNKS  
SISLGGISAGGYLSCILQHLARDNNIPLKLIIPAVAPVTDCCSYKKLEDSPYESFRQYSRAP  
LLNWARISYFQQYVFPDDRVDYIRSLWPEWWLSPIKAPNFANLCDTFLITAEIDPVRDEG  
EDYGKKLVAEELANVNMDLRYLGVPHPMHMTDYLQKARDYDEDIISALRVAHGL

>3251\_t gene=3251\_g

MRTSTQPFLTALALTGVALSQDVSGTTKFQSSNKRLIYVTS DHPSSDDQIWVEGNSDLT  
WYYDYTDTPAAAYSNRSQEEFEFVPM LWGSANSSGFASEVKSQITSGRKITHILTFNEPD  
GTTSTGGS AISPADAASIWIQDVEPLRNESIKIGAPAVTGSQSGLTWLSEFFSNCTSLKTNC  
TVDFIPLHWY GDFQGLASYLGQVVATYPNTSIWITEYALANADLKDTQAFFQTS AEYFD  
RLDYIERYSYFGSFRSSVSNVGPNAAML TQDGQLTDIGSWYLGGAATGNVPSSSSSSSPT  
DSGSTGVGYKPD SYNAVLRALAFSLAGLAFV

>3252\_t gene=3252\_g

MEKSTVVVTTEKYHSRSEENSTHEYPIDNPFSTPHDQRSIISGQQYSIFTGMALSTQLSLL  
ARKKQNHPI LSILVCYLRVDALFSSLESKPLRQRKFKSARLIG EYDKPWTVKRDP RMLW  
DKIFFVGLTIVGLGIGAYIISGWASVENPPYCLVFEDDFLNGINENDWNYEIQLGGYGV  
GSFDWTTNDPTNAYTDENGLHIVPTITNTVDITNAQLYNGYTLNLTQQGVCTADDSGD  
CVRVSNITNTNSIINPVRSARLTTKGKH NITYGKIEVRAKLPRGDWLWPAIWMMPEADVY  
GGWPLSGEIDIMESK GNDGRTYNGGRNVVGGTLHWAPNAALDAFYRTNGVKYMTRGD  
YSDDYHTFGMEWSEDIYTWVDTRLAQSMYIPFGQKYGTMYERGNFASMSVNGSIPLD  
PWSGTRKRYNTPFDQAFYLIMNVAVGSTNSYFEDGYGSKPWIDGSGDAMSQFY NASSAW  
ESTWGEGDTRGMSVKS VKIFQRGNC PSS

>3254\_t gene=3254\_g

MATTFDEKIPYEKNGLQLYGLFKRGDQARALPLVLLH GSGATVAYFDNSAVSVVKS F  
HSAGYDVLNISRPGYAGNAIPTSEKPM SDSIPVFIDFIEKVYNEKSSAKKANS GIVLFGHSL  
GGAYALSIAAEAQDRLPLLGV SALGCAPLQNSKSLLPNPDPEPSNPRFFVETNPQNIRRF  
MGEVEWLNIEALDPELVVQVFEPGIKSELREFMTDDFYDYL VNKVYPAIKIPVQYLCAEL  
EVAWDNEKEGRPIFDNLVSKFTNASEIDSEILLRGGHNYEFSLNHGLLWDKRRTFIEKLT

NKYASSSTNGIGKDDIITEGVFTSVPVLDYAESLSPSTRPAFLKALKAAIVNVGFFYLKNT  
GVPDKVQSNFTEQSIALFNLPLEKKLEIEMVNSKHFLGYARLGQEV TALKNDYREQDFD  
ATELPAPGPEEPLYRNLRGPNQWDPQALPHFRAAIESYMDHIDKLAGSFKSLVAEALDL  
PATAFDQFFDHPQQNKLKLIKYPEPVDSNPDEDTQGVGPHKDSCLFTFLMQGTPHTGLE  
VQNKAGAWLPVKPIPGTLVINIGRALEAITGGVCTATTHRVLNRRENYKDAQNSLGPR  
YSFAIFQGVSLDLGVEKINISPEHIKDLVKDEKVRSDAEATFNQMFNGNIGEGTLIARITS  
HQDVAQRWYPDLLAQALQAQKDKYQ

>3255\_t gene=3255\_g

MSHIRIRPLAGLFLVFLCTLYFLISNTLGFIRIFSSPHSGIALSQSGIRTAYYNHTIDKTHEPVI  
PRKIHQIYHDWVGQGGNVPHTAQWMRLRDSICINRNPGWEYKLVSSAESREFLQREYSW  
FLPIYDSYRHPVQRVDALKYFIMRHYGGIYVDMNDGCLESLEPLRYYPAFITDGGEGPL  
FINILGAAPHHPFYEYMTNNIWAYNLFYYPLPYLTISYNSGRWFFTSMWKEYHDSVNR  
NWNLVHSAGEGADQIHASGINNKDQLYRVMMENRRGAEPWVFWNEGAGLTWENWD  
YSIFQWIGQNAKTVIRIAVAVTASLSVIASLVVWRCCCRGRKAKSSATVGFKSV AALLTP  
VLSPVLTPAKEKRVEFFIKKGHDMV

>3270\_t gene=3270\_g

MKLSLATLGLCVTAAVALPSELAQRAAGDLSKRQSITTSQTGTNNGYYYYSFWTNGGGE  
VTYTNANGEYSVTWVDCGDFTSKGKGNPANAQTVTYSGEFNTSGNAYLAIYGWTTD  
PLVEYYILES YGTYNPASGLTSLGQVTS DGGTYDIYSTQRVDQPSIEGTSTFNQYWSVRT  
EKRVGGTVTTANHFAAWKALGLEMGTYNYMIVSTEGYESSGSSTITVS

>3295\_t gene=3295\_g

MLLQLLLSSWMTVSVLGAPHPAPPPPPNSGIFNNVTFIPPESWPSHSTSYARSLLLDQDC  
ETDNVLLASWTFSPDPGYLPIAKSTDLGYSWNEISR VYFTHRNYTGGIILQPFELPQQ  
VGKYPAGTILATGNAIPADFSSTNIEIYASKDHGLNWEFVSVVATGGAPNTDNGATPVW  
EFIGIYNNQILVYYSDQRDPLHGQKLSLQTS HDLSQWSTVINAVAYGNYTQRPGMATV  
AQINGNKWMISHEVGLAPQGD LAPYAVHYSIADSPLEFGSAPSHLLQARNTGTISSAGPY  
TVWTPAGGPGTIVVSDSTYSQVFINKNDGDPNMWEEIETGLGVSYTRGLRVM PDESVI  
LFLNGGYGLPAASVTAGWKVPGPSSSRDTISNCKNPHGP

>3315\_t gene=3315\_g

MADVQSIQRFFQEHLNVRVVAHNSPEFQDIRAAYIKNIPIVPLGIARPQTAEDVANVIRYI  
KKEGLKFSIRAGGHDLYGRSFIQDGIVIDMRDISYVQVNESNSVAQIGGGALASSVAKAL  
SDEGMATALGSFPSVGYAGWATHGGYGP FAPNYGLGVDQIVGARLVN WEGQIVDANE  
GMLKALRGGGGAIGVIVELTVKIYPLKQILAGIVLFESKDIESTIRKIINAFSHLRANGLPV  
ELGLQQSVVNTLHGKLF AIGFMWSSSEMELGKIYLQQVLNFGEVVDNSVIPTNLSDWLE  
ESGRLPPNAYGAIC SARVRVQTDQIADILAKFAKSM PEDRGTLYSVHEIRGPSAKPCSNS  
IFRTRERHFLIECIGTAATAEAAPQSWEWALQLRHAIMQTEPANIIPGSYLPLNPPDEFSSD  
EVYGEYWWEFKELKKNYDPQNVFKNALPRFGPSDHV

>50\_t gene=50\_g

MKPLHAEWSSFITQNPVNRHDDDGQRNRDFYESPAGRDLITEVSTRD TTIPARDDHEIPR  
IYSAKQGLCHGVVIFHSGGFTGG SLETEDVSCRYMALSGPLTVFSVEYRLSPAHFYPV  
PINDGWDAFQYIVTNLSSLLANLAPGMTNLV VSGTSSGGQIAAIVSRRAQTWMKGNVSC  
VNITMSGVLLRAPVTVRATEARFVPPAFRDLHKS WRAELETVRLTRQEMEEMHDTLGV  
PPDIRDSPEAYPLWGPFHGLPKTYIQICEVDILRDDAVCYA QGLQDAGVEVQKSLYTV

>52\_t gene=52\_g

MACYSVVRLSILLHWLCIFACSAVAAITAATDLANLRAQLSPNTSISWSTSDAPRWSYD  
APQPIAVINVAEAKDVQITIQCENSESIPYLVQNGAHGSSTTLGQLYYNGIINLAALNRVT  
FNSEKTLVSLEGGTLMSEMIQSAYSNSALVLSGTCNCIGYLGALLGGGIGYLMGQYGLM  
LDNVVSLNVVLASGQAITITPSADA EYDESLWWALRGAGPNFGAVTSAVVKSYVDST  
ALKAWLGPLIFEESQLGTLVQAMNDITLQPQMAMSLTFASSGNTSVSPLIILTVFYHGTE  
AQGKAAPAPIYEIGPVADNTSIIAYPDWNAQAQDTSCIKGGNKPSFGAGLAELEPESWEAV  
YDAYKEFLLNPEAQDSVILLDAYSTAQISSIPDSSAAYPFRSTVRFNAQASLAWNDSGFD  
ASALAFGSFCRDKWRLSSGLKNNSTYINNAFGDESLTTVYGQSLHRLQALKKIYDPYGR  
FNYWFALDGDKR

>58\_t gene=58\_g

MLQLPWIWYITLCVACTSSFAAALSGSPFSPDPSPFGIPGDDASYDYVVVGGGTAGLTIA  
ARLAESGTYSVAVVEAGGFYEEADGNLSVIPSDDIWYAGSSPTDFNPSVDWGFVTTTPQA  
GMNERQLHYARGKCLGGSSARNYFTYHHGTYDAYHMWATTVNDSSYEYYSFLPYFKK  
SVYFTPPDNEQRPRNASVGYNPAAFSPTGGPLQVSVPIWANSFSSFAKKGYERLGLQQV  
VDFVSGTLIGVQYNMNTIDPSRQTRSSSETS YLRMVESNNALRVYNQTMAQRILFNGTT  
ASAVAVRSGNLDYTLFAKREVIVSAGAFQSPQILMVSGVGAQTLRQFNIPVIADLSGVG  
QNMWDHVLFGTSYRVSTLTHSATSNATFLAEVLEEYMTNRNGSGMLGNPGDLIAFEKL  
PSSDRESLSPETLASLAEPADWPEIEYLALDAYSGNNSDYITGAPKTPYMYVSPSAALV  
APLSRGNVTITSASMNDPPLINPNWLTHPADQELAVAALKRVRQLMDTEIVSEVVVGEE  
LLPGRNVKSDSDILYAIRENGIQVFHAAATCKMGNSDDPSAVVDSKARVFGTRGLRVVD  
ISAFPFLPPGHPQATVYALAEKIADEILCADV

>92\_t gene=92\_g

MADKSHARSEEQHATTDALKLVNRLNESRSPYVRGHMNNPVAWQLWDSKSIELAKKH  
NRLIFVSIGYSACHWCHVMEKESFMSTEVA TILNESFIPIKVDREERPDIDVYMNYVQA  
TTGSGGWPLNVFLTPDLEPVFGGTYWPGPQASSHSHWAAESPIGFVEILEKLRDVWQTQ  
QARCLDSAKEITKQLREFAEEGTHAQQGA KGDGEDLEIEELIEEAFQHFASTRYDPVYGGFG  
GAPKFPTPANLSFLIRLGMYPASVSDIVGLDECVRATAMATNTLLNIARGGIRDHIGHGL  
ARYSVTSDWLLPHFEKMLYDQAQLLDVYVDAFRATHEPELLGAVYDLVSYLTSEPIQAP  
TGGYFSSSEDADSLPTPNDEKREGAFYVWTMKELKQVLGQRDAGVCARHWGALADGN  
IAPENDPHDEFMDQNILSIKVTPSKLAKEFGLSEEEVIKIIKTGKQKLREYREKTRVRPDL  
DKIIVAWNGLAIGALAKASILLEIDKVKAAQCRDSAHKAVEFIRKTLFEPSSGQLWRIYR  
AGSRGNTPGFADDYAYLTSGLVAMYEA TFDDSYLQFAEQLQKHLNQYFIAQGESGTTA  
GYTTSSKPIGEPGPLLRLKSGTDSATPSINGHARNL VRLGAILED DTYRQLARQTCGTF  
SVELMQHPFLYVNL LDALVGLELGVRNITGVLATDTVATTIQKDAEETQPHKNATDVV  
RERVRAEAGSAASTSVTTVSMVDIRGSNVSTTWLQSRNPLFKDLKPGTPLKNYLLVCET  
GSCRIVDI

>116\_t gene=116\_g

MTSTEASQDITDAIAAGFDGFALNTHTISSKDTWNTDAINYLLDAASGTSFKMFLSFDMS  
WGLDVSSLSGFLTQFSNHSQYYTTS DGRPWWSTYSGGSSVSNQWNSEFIQPLVAQGV  
PYFVPDSDDWPGYPTGFFDAFPVLDGAFSWESA WPGAGTVAANVSDSVDES LIEQAHG  
AGKIYMMPLSTFQFKYLGSGSDWYRIGETNLPERIAQILSLQPDFVEVITWNDAGESHYV  
GNFWPEQIAGTSEGDIANGYDHTGWQQVITPFITAYKNGATSVGQITTQSGSPEGAIWY  
RTLLKSASCANTITNYQQAEDAINFAVVL PASDAA YTIEVYSNDALIGTFSGVEGLNYES  
VPGLQAGSGQSIRVLDGSGNVVKTANGTKDVLNESSDSSMCNWNVEVVGLS



>134\_t gene=134\_g

MPTSTLLKGGTLLIHGEHDLVQSTISDLLIQDSIIVRINPDIDADGEKIDRVIDCTGKIISPGF  
IDTHHHVWQTCLKGTHADETLDDYFWSGNFINSLLSPEEIFWSELAGTMECIDSGLTTTVV  
DHATVNYTPEHSIEALRATIGSGIRSIFGYCPTPRVRSWKPEFKLDDDLPPWVMETFDQL  
AALNPLGPSGLVRLAFDFGVWLPKEQLQPLFSKVRQAGSQLITSHSVYSAAFGAPHAPS  
VVQTMHEKGLLGPVLLSHNNNPRPQDQDVLRLNNTKVSCTPSTELQMGQGNPVCFMD  
KLKTISSLGIDCHSLCSAFIPGQMNLAALQWARGRRNEEYESQGKWAKTLTSLVQEAYNL  
GTIQGARSIGMEAEIGSIAVGKKADLVIFECQTPGMIVAADRDPAAIIVLHSSVRDVETVII  
DGVIRKQRGVLLDADVPDKINPSTTDKWRVVSWKDICGKVLALSKEVDKRRKKSIDPKV  
AVDGIMRGFYMNLEARC

>142\_t gene=142\_g

MYINTKHLGIALLAPSLVAANSMTLLSKRDATTYEQNAVCTADQLLSYGTVNTGLFG  
QDLWWQSGNFISALATFFQLDPDYGSIHNNIFATLSEAPGYGNANFLNGWYDDEGW  
WGN AFLDVYDYTSDSTYLNQAITIYNDIVGGLGTPCGGIWWDKDHTYVAAISNGLYTEL  
AAGLANRAGGGSYLANAEANWNWFSSGIVGSDHIVRDGLNSDDSCSLNGNVFTYNQG  
VILGAAAELYKATGNQTYLTAAALADASTASGSDVTSSSGILTEGCDKSASCDTTAEM  
FKGAYIRGLRKLQLVDPESNWLNLYLTANAQSLWNHDLVQNVNGDSECIVGSAWAGPF  
NSNQANVVTQGAALDALNAALAATHDEEEEDDEEENEPRRLYGGESEQSENAESERSF  
NRSADADYYYELKEQGEDQKREVREGKSKAYVFDKSKEVEVQSAYDAVKLDKKSPPVDL  
RLFDPKISNNFRIYSTDWVKHCFSSSLHASPYVKFYEMDENHFQPSSEGRTRQIEGHLIYH  
GTLDCGFNPFPPKLSFEEIELQKQVRNNYSILQS

>147\_t gene=147\_g

MFPTTWRGLFFALLVVLTTAQAAKTDQAATTNVDTCACGFYDDTADLYFTDSTIVYFN  
ESGSIPSDFVVEEFHRYDRGWNNMYRMGAAVDNDVQVTKDVTAKNLTSLELSCLPSDQ  
DHLVVGSSVRTARQDIFFGSFRSTLRPARNSLGS AISMNLVHNQTESWQVDVMNADNS  
SQAWVDMLMQGFANTWLGTFNFTNLTEGELKPWYYLEYRVDWTRDSLNYIYIGDVL  
TSYNTSVNSSIPSTPAPLKFQHWSTGNKYTSQGPPIFTNLANVGYARLFFNSSTWNDTTR  
AAYDQRCISIQKACDMNDLSLRGSSNFDPPQSLDPWKQHQPYPYKIRWVPLIIDIIIFVVL  
TGKTLWRRFTWHKLMVFLGVHERDPPKPRSFDAPACSTPSLDRDSSHNSRDSADAASSSP  
ASHNDTQRDL SRNESFATLPPYRGSQTPLPQYQSPAASRRPSTLNMAGNSFAYPTSLNNT  
VQGESSRVTSRAASRAPSLHAVPMLDYLSTPSQEVYSSGAMQVDGSSEKNKEATKTEEA  
LPAKDGQTKPGEASKDGKPTAGAAAASAKPPRVYLAGFISISALLVTVNHFGITYFGA  
VIMPGNSPHYHSEVIARKSFATYFLDPLWIGPFLMISTRFLTSNYIRTGKLDNMAQKIVAR  
PFRLTPVASIAFLEYFLMDAGALNWLEYLPSVTWSDWPFTAIAASNPGTFISEILQLAFLIP  
NAAPMITNNYCTGVLWTIPVQLQGAWQTLGLMIRQIKTPWKRFSFYVFTVMHWYA  
LSWGSYYYVGILLADLDLTYKYKQKWLWHPWIYWPVLILMACTAIGGFSIDLVTQHT  
GVNYAQIEYGWHPDVKTGLTLAQAQSASYPDYFIPRLNAFLTTITMQGVVEISPTLQKIL  
SIKMLQWLFPHIFSIYLIHGFMWSVGSWAMISMFSHGYPYWLCTLITAIVCYGTFLFAVL  
PILTPPIEALGKGFTQRLWQFASMEPVERKPTTYPFGEFLTTRDQLQDPSKPGSLNGVPP  
SSASSSSGRVTGVNEKDVS GKGKEAEVTVTELKNGPGPTMDQKNEF

>148\_t gene=148\_g

MEKQVDVEVNALHTPVEPLRSSERRCNVRSGLKKVYQDVS WVFTTASDGVQDWTPIV  
LVLSYFVFTTIYMNATSGITEIFWFIYLMNTNYIATATVIESISALGNFQDAKRALEKVAK  
KNWVFTAENDLPKLDIIIVAYLPNEQDIVMDRVKYLLEEIVYPRDRYRVNLLYNTPIAI

QPLESELFALADEYAKNLRVIKVPGSKSKADNINYYCNVIQTDAEISAIIFDCDHYPHYAP  
KWAMEQFAKDKELEIVQGRCVVLNANDNFLTAMIGIEFDKIYAVSHPGRSAMFHFGLFC  
GSNGYWRTPLLKELKMDDSMLTEDIDSALRAFGHGAKAIHDINVTSFELAPITFSAFWK  
QRLRWSQGWIQASMRHVHLVWSRSREGKHRTMRQRFGIFSLLFVREISYYLITQYLCLV  
LSVVITEFPKNGHDLYKLVFFQYPVAWWLFIFSLLA FVGT LWVTFHFRSEFCRWYMIPIF  
AATYLPQLVLTAIIGLFGHARQVSKYVKWNPTPRN

>175\_t gene=175\_g

MDPSYPIPAGLHKVPDHLLDLRPDEEVDQDLLNPKAVTDEKNVWFFWHTGYKTMHPYT  
QRNVRAWHRRLSKHG WVVRLDRQPNSPLNVANFLDISDPGTFPRAFVDGTIGGDYAP  
QHTSDLVRWPLLLKYGGVYADVGLIQIGDLNRLWDETIGNPDSPFVVSYNAGGVSDRS  
LTNYFLASNRNNPLFERCHRLLELWAADGGKTSTEGMHSSPLLKEVPLMHIDSTIVDG  
DKVLNSDDVSRLLDYIIQGQVLTMMVGLIDEEDGWNGPQYVADHVYGIEFMESQLI  
NEFTNWDGQKAFDMLSLPLPKGEPESAQQKEAREIVEGCLQRSFGKLAHGLILRVFKS  
TLGSLWRANPGSDDVPGTYAHLWRHATYWNQDHIPPTLKFKVIPAFKNGPLLRAS

>193\_t gene=193\_g

MCDFSRYGIPSKEWLEVEGTLP SRQDKSIEELKTSNNTTREARAKEEMKELQDKVSLTD  
YSIPTRDGS HLEARIYRPKSRPTGEALPIYMHFHGGGFLFGTLNSED SICSRIATNVETIVC  
NINYRHTPEHKYPTAWNDAEDALIWLCNNYSVFNGDCQRLVIGGISAGAWLTASLVQT  
VLRGDITLAHKSTILGQVLMIPC VVSTPCYAPILEKLLDLSVSSYQAKDAPILNEKTKSL  
FNSLLQVQRDPDNRRLNPGLLTAQEAGRLPPTTLGIAGNDPLRDEGLLYGKFLAENGVP  
TNTNVFKGLPHGFRRFQDKLSACKNWDLV MEDGIRWAWSKPSASGKFTINEY

>222\_t gene=222\_g

MKLTQFLLVSGAFWPLAHGALLGSTVTLPSGAGTIQGLPRNNKTSILSFLGIPFAEPPVGS  
LRWAAPQPVNALSSNPYNATEFGPGCYQSEISAPAFGPISEDCLTVNVWTGAHDTADKR  
PVMVWIYGGGFQFGASNQPNYNGANLAQQGVVLSVFNYRLGVLGFLGLSELDPVPGVE  
NSGNFGLQDQLAALRWVKENIAAFGGDPDNTVVFGE SAGAHSVGLLLSSPLSGSLFNKA  
IMESGAYWDSEHGSIQNFTETRTKGS AFMQKLG VSTVSDLRALSAETVNNAALWNSSTD  
PAITAFAPNIDNYVPAVPAETFN RGN AQKVS VLAGFNAAEEYLF LPRAI PHNTTDQFRQ  
SAQVLFGPQTA EFLSFYDGATDAQATQSALDLDGDLIIREQTFEALDRQASVNHQTVYA  
YYFTYTS PYSVA AHTAEINFVFGNLGNPPIFGETPGPSATDVSLSR TMMEYWTNFAKFG  
NPNNISAGLPGWPQYTSNGGNFLEIGNNITAITNPYLARFEFIGSLRHNGSLPVTWRNDF  
DDN

>225\_t gene=225\_g

MFSRTNFLPFLLVGLSISQTKALPVIQTTSGLVQGVASGR TNQVEEYL GIPYAQPPV  
NELRWAPPERFHGTCFIDAT SFGYSPANATFASRGELETRSEQLGLTPQAIPILENLEQP  
GVQYSEDCLTLNVWTKRSVNNTLKPVLFWIYGGGFNTGTTNNTAYNGKYIVDLEDVHIV  
SANYRLNIFGFPDNP NRNLGLLDQRLAIEWVRDNIAAFGGDPNRITIFGQSAGGESVDY  
YTYAWTSDPIIAGFISESGTVYSPGAQTDVATSASRWYYVTATLGC GDASSDPDALLTC  
MRSKDWQDIQDVIPASTGIASVTGLFGPTIDNIVVFS DYAARSAAGNFIKRPLFLGSNNYE  
VGLFRPIFGAENVTFTAQWDYLN FVIYTCPTAFRAEASF SNGVPTWRYRFFDEFPNLRL  
TTSPDSGAWHGI E VPLIFNTDGD LQNI VPRTEETE IAGYLRKAWVAFVDPEDGLEA

>232\_t gene=232\_g

MSSRRVAKSYANPIITGFNPDP SIIRVGQDYFLVTSTFEYFPGAPIYHSTD LVSWK LIGHAL  
TRPSQLQIHTPEPGSGVWATTIRYNNGT FYVITASFERYRPQDDDRVWPRGFYVKTDNI

WDSTSWSDPVYFDEVGFDQDLFWDDDGTVYLSTTRRKLHRTPGVNLKDFAIHICTVDL  
ETGNSTSEPRLIRESPSGVSEGHIFKRGNYYYLFTAEGGTESGHSEWVCRSDKSPFGPWE  
AGPNNPLCHNSIEDDVQNIGHADFDVVDGNWWAVLLAVRPVKKSDGNWETSDFGRE  
TFLVTVDWVDDWPVFNAGQKVSLSQSQQAVVQKKSKTWIDDFSDTNLQLGWYRKNT  
KKRDYSLIKSPSCLRLHGGPYRLPDPACPTLFLRKQSERFCTWETRLSFTPSSLYTEAGTA  
VWMDYFTYSTIGIRLKDYNSSTNENLKENALRRIIRFTPPAGSGVDLTHELKSLSDSIIL  
QINCGDRYRFSFKEIIDSNTTTPDQFQYLGEVTNEIMTRSPPIGLQFTGVMLGLYAFGTYH  
PCSTPADFHVVRMTNAPQ

>234\_t gene=234\_g

MPASESETYSPSSPSSDGSNHYRIDEKSGNGYSTLEVPPSNLEHYRRVSEVRRSFYPN  
WLSSGHTTNNARHYPSTGSGSEVPIPRPGEINGSVTRITICGMPQRAFWVIFGVIA  
VIVGGTVGGIQKAAVPTVAVVTVTYTPKTTTSAASETFAAAVTTAVCVGGYGQGN  
YVGLCSFACSYGYCPAGPCTCTSSGTPVPTPATEGINGVPLSSEDDSYLGLCSFCNHY  
CPSSACTTSSS

>240\_t gene=240\_g

MPILISNVVNGPDSAVDASWTDVISRASASGKKVLGYVRTGYLGVSDQKFLTRLGSGNL  
ADWTAQIEEDVNMWYKLYGDHIGGIFDEGWPECGDSNQYADLYKYINDFTKRAHPG  
AYTILNPGSPMASCDEFDTMDTLLTFELDYAAYTGSYTPNNWVPKDPKRLWHIVYNVPE  
AITEVVNLSKERGAGFLQLTDDLNPYDTLPSDSYIQTLGAVAGGSLLNADASAWSA  
GGAAGTVSDLILFSDYSSAKLSWTTTALGYHIYQGETIVASVPSSMTTITIGGLQPGT  
SNAFSVRAVGGGGVTGSASNTVTVNTNSLNGKTIADYNVTAGATSTTYHADILVPYAF  
VRLYIWDVSECDFDNDPGWSVNFVDDYVCTHYMVEGTTLYKYSGTVPSTAPPWS  
WSEVGPITLSITGYTYSWTLPLGTSTVDTTKFVIQAQGYNSFINIFDPDPTAYDCKGSTFC  
TTPDLLKWCDAVNNLQRNDNLTYGTR

>246\_t gene=246\_g

MYPTRRDEFTIAMICALVEEANAWEAIFDEMYDSMQEKYGRTAGDRNSYLNIGRIGKHN  
VVVYMPGMGKSSAAMVASDLRFSYTKIEMDFVVGICAGVPETANGQKIFLGDTHIISNS  
VIEYDFGKQYPNGFQRKRGVLDLGRPSPEIRARLVALSGDRSIEFQRKMAMHAQKVQ  
PVGSKWRRPASDDILFNSTYAHKHYKNSKADSCLCLSDHISDAICEGAMRVDCTALGCD  
ESEVRRRRTQTDMGNAVIHIGPIASADTMKSGIHRDQLAHAEGHIALEMAGVWDFN  
PCIIKGVCDYADSHKDSKWQLYAAANAAATVKAFLEYLNNDTKIESSMAKTDKQVQW  
TVPFRRNPKFVGRRVQLEQLRALMSDPNGPRELITGLGGVGKTAVAIELAYQLRDADP  
DCSIFWIPCTSQASVEQAYSIDIARRLRPDQTDVKTVMKDYLSQTISEKWILIFDNADSEH  
MWMKDDNALRDFVPDNECGRTLFTSRNGQLAIDLADSNIVKVEFDLETAMEFLQRS  
LQDQDLNDHKTVLLLLSKLTFLPLAITQAVAFINRNQISLSTYIEILDKQEMEMIELLENF  
QDKWRYKDVQNPVASTWWISFQQIQSNPLAADYLSFMSCIDPRNIPQFILPPATSKNEK  
IKAIGLLKSYAFVTGSETAEDKLLNLHRLVYIATRNYMRKSLTLEDRMFRTFAQLESIVLS  
GGPGIPVHQKAKSLRGVYNHIITLLREECIRREQIKNHEFLGQFLHCLVYDFRLIEAEDLCI  
QFIQISSTQEGFDYGTLYILECLITLAIQQRQRKMKKVLDPFIKRLKVILDQFSATIGSWIP  
SPTTSDDEKVGFTSAILETREPDIFAILNYQRIIAMFFRVIDRLTVSEALFQFTIRISQLILGP  
DHPNTLLCQRCLATQYHELQONTRAEKIYLQINTTKSAIRPDQKELLEYEASLAEVYCD  
ESRYAEAEKCYLQAISSSEVIHGPNDLKTLNFQFCLAVMYQNQSRYEAEIDMLRVIQM  
AQLVHEAGSSLFVSGHMAGLVKLYHDWGDGDKAERASTQFIHYSRFTEKHPSTMSDTE  
LMSQLRAIVARMRDHAKRPPPINSPQINQ

>264\_t gene=264\_g

MDYFKLTTVGLRITSGQEENCPDFDINSWAITFVGSDDGFQDDCSCYVCPMLRWDGY  
PLDDLYYAFRHRGLGNISSPILKRDETTVVFLSQKTRGYSSDKNRIISIHNNHTGESEELF  
QSQDGKQWDLSPNAVTYGLDRSLLIQVEEKGRQVLYKLLDHWVDPKPTLASLELV  
GFSTYGSIIKVTPIFSELSKSRLLVSYDALNHSKEYSIFDPVPPGLQSLVHPYINLPRSQIEEI  
SPFGANRQVHTVWVRPSNFKPELKYPVILSIHDGPQNVWLDQWTMNCNLITLAEQGY  
VVVAPNPTGSRSYGQDFIDAVRGSWGGLPYNDLQKVFYVQNNLSYADTERAVAIGHG  
YGGYMVNWIQGHDFGRLFKALITDNGIFSLTTLASDIQALRYGLKGLPWENPSEWQK  
WDPAQYAGKWQTPHLIVHEKFNKQPIAQGLASYHTLRLREVETLLTLPDGSHRHQHP  
ENLLLWYHTVIGWMNRFVKS

>281\_t gene=281\_g

MMKSFILSLSFAISALAASRMTAPSGSLVVAKSGGKYSTISAAVAALSKTSTSTQIIFIEEG  
TYDEQVYIPSLAGELIYGQTEDTSSYSSNLVTLTYGLSATQAGSDDLATLRNYAAKSR  
VYNINIENSYGVGAQALALSAYATDQGYACQFIGYQDTVLAETGNQVYAKSYIEGAID  
FIFGQHATAWFDDCDIGVLTQSQTITANGRSSSSDSSYVINKSNIAAASGQSVASGSY  
YLGRPWSEYARVVFQYTTMSNVINSAGWEEWSSSEPNTEDVLFGEYDMSGAGSTGTRA  
SFATKLSSPIEITILGSNYADWVDTTYLS

>285\_t gene=285\_g

MRFIGTLAAVLSLSTLVISLNTSEALPVVDLGYELHRASGFIQELDYYNFSNVRYAAPPV  
GDLRFRAPRPPIANRSIIQDGKIGRICPQANPAWQIAAAGWALPYILDGTIPTNYSYSLTTP  
TDATISMVRDPRETEDCLFLDVMVPRKVERADKSTEAPLVYIYGGGYTEGEKGTVDP  
TGILARSQNHSADGVYVAMNYRTGAFGFLSGPTFQEDGTANAGLYDQRMALDWVQT  
NIHLFGGDKNRVTVFGGSAGAGSLIHQVAVFGGSQQAPFQQAIPQSPGWPNSTLFDQER  
TFNDFLGYANASSLAELRQMSSNDLIYANALHIGRAPYSSFIYGPVIDGKFVTQDPRVLL  
NHRQHSRNVVMVAHNTNEGLGFAPPSINNSDFDNLKVGFPSSDASILDLLTNTLYPPPS  
ENSSLYHNQIARAFFATESNFACKAFSLASTFNESYGYWFDVFPATHGLDSSYIFYNPY  
ERTSSSPNETLAFAIQDYVTTFAIRGTPSSSVDLGAEFPTYGKNGNVIKLDATGISIATDSV  
ANDRCRWWNLGLYM

>295\_t gene=295\_g

MSLNFQHAPVGPAILHDRLKFLDGYEAKLQDSLQWNQCESAEEYRRMRREGLNGFPKP  
VLNPRARTTSFTARDGHNIELRIISPSQQSKGVWLHFHAGGFVIGSNASYDPYLTTLSEK  
LGFTMVSVEYRLAPENPFKPLHDCVDAALYSLTPEGQEMLGAPLKILGGESAGGWLAV  
STGLSLKRDQGLDVRSLDAIVTGYGIYDMTYTPSLEHTREIILSKKGMMDFAEAGFGHI  
PMAERKNPLVSPLYADLKGMPALFLTGTIEPLVDDSSFFMATRWFNAGNQAELCVVEG  
ACHAFTIIGMGEVTDDGINRIVSFVEKCTGTATRQTM

>309\_t gene=309\_g

MLGSIVLALTAYLAVTQALPGHSVPDKGSSCGKLNDCSSDPWARLYPAPGAVVVDNSA  
NPHPGSFTTVQAGVNALNSTTTRPQDLFIFPGTYKEQVYIPKLKSNLTVQGYTHNSKGYH  
KNTVTITYDLALINTTSDDLTATLRLWNPNTKVYNLNVVNTFGHIPKNGQNLAWSAEAT  
GQGYGQCQLIGYQDTLLAETGVQLYAKSLIVGAVDFIFGQNALAWFENIDIRTIAGSVT  
ASGRGSATNPSWYVISRSSVSGINDTIPAGINYLGRPWGSFARVVFQETYLGNVIASAGW  
SQWSKSTPNIGNVTFAEYNNRGPVSVLQEGPRANFSEQLTQPISIRSILGEDFENEWWVD  
TAYLHKGDLKSTFTSTITSTASSTSTSTSSPVLTSSTTSITVSTTAALTSSVSFSSILTTTPT  
SSVSVPLTTTAPTSSQSASFSATTCTCTDYSQISPAVASCTNIVLSNIAAPNGSAIDLSGLQ

AGTTVTFDGLTTFGFTNSSTFNPLTISGAGITITANPGAVIDGNGQAYWDGQGSNGGVPK  
PDHFIVVKKVTANSVFKNLYIQNWPTHLSISGCSDLVFQDLVLNNTAGDAPNSASGGLP  
AAHNSDGFDLSSNNIIERSLVYNQDDCVAITSGDNVTVSNLECHGGHLSIGSVGGKS  
NNNVTNIKFTDSSVIDSQNGCRIKTNYNTTGYIANITYANIAISNVSIYGIDVQQDYLNNG  
PTGTPSNQVSIQNVQFLNVTGTAASSAQDYIILCGDGSCSDFTFSDVLISGGGVANSCNY  
PSSGCPP

>338\_t gene=338\_g

MASSSTEVPYPYKNGKLHIDQRVEDLLGRMTLEEKAGLMFHDIILIGPGRLLAERNTEFG  
VRPTDEQIGLLMSHFNLLGPITDVRETAEWYNRLQKRALQTRLGIPVTLSSDPRHHFAN  
NVGTGFQAGALSQWPETLGLAALRSPELVERFTTVAREEYIALGIRLALHPQIDLATEPR  
WSRIGKTFGEDADLTSQLVGPYIRGFQSGGLGPDSVSTMTKHFPGGGPQKDGEDPHFS  
YGKEQVYPRGNMEYHLRPFRAAIAAGASQMMPYYGVPIGTKFEEVGFSSKIGIVTNLLR  
EELGFNGIVCTDWGLVTDGMIAGQMPARAWGVEHSELERVRKIIDAGCDQLGGESRP  
ELVVQLVQGLVPESRIDESVRLLREKFLVGLFEKPFIDVETAVRTVGKSEYKQEGMEA  
QRRRAFTLLTNSGILPLRASNKQNIYLEGVPAVATSRGLQVVDLHEADIALLRKAPYE  
ARPGGFESRFHAGSLEFTEEKDRQNAIFKAVPTIVDIYLDLPAIFPEVVASAAVMVSY  
GSSANAFLDVVIGLASPEGKLPFDLPSSMKA VQESLSDTPYDITKPTFRFGDGLHYGNST  
AALQP

>9\_t gene=9\_g

MASKYIKNATVLSVDETIGNVHNCVVIEDGFIKAVGPNLEHSDHKVIDGTDIAIVSPGF  
VDTHRHTWQTQLRTICTDFVLSDYLLNVRHIYGCYSVEDTYLGNYCGALESVDNGITY  
LIDHSHIMNSPSHADA AIKGLRDAKIRGTFCYGFYPNPAWAGSNVDPEREKDVEWRLAD  
AHRVREQHFPSNAPDQLLRFVAPSEAEVIPFEELLHQIKTARSIGAAIITAHIALGKFDSDG  
HFITRRFGELDLLGSDFLWSHANSITDDEMDLVKKYDLGLSATPEIEMQMGVGYPVAY  
KAKEHGLRVGLGVDITSNCPGDMFQQMRLVLQAQRYDDQLKSPFPLPMARPCAEVLEM  
ATIGGARAVGLEDIISITPGKRADLIMTKCDSTRTPVHDPVAALVNYANGSDIDTVMV  
NGEILKSGGKLVNVDWPKIRADVRKSAARIMQMSKLAPQDQLEDARNAMITALTVAKK  
KVSAAA

>11\_t gene=11\_g

MTFTIGSVPIQVPLPPPETDAKYDNA YHSVTLLKKGHKKSVEAAPFQADTIFEKDIQLTL  
RDGVRIRADIFRPANDA EKVPALVAWSPYGKTGRGFFCLDLVPGRVGVPKSRLSGYEKF  
EAPDPAEWTARGYAIVNVDNRGSWDSEGLIWWGTAEGRDGYDVVEELAQLPWCNQ  
AVSVFGNSWLGHIIQWFVAAENPPHLKCIAPFEGASDIYREIICRGGIPCKAFLRFLAEQHF  
RGTQEHLVSMIEKYPLMNDYWADKRAQVSNINVPYALASYSTGLHTFGSFRGYTEASV  
TNKWLRVHATQEWHDLYQQKTNDELQQFLDHYTKGKDNGWEQIPKVRVSILRYNKEPI  
VNHIFPAWPISTKQEQLYLCPNAALSQDAPSRETYISYKSDVSFMQMDKDSEELSFHFSF  
KETAYLVGNAQATLYMSCPDHDDMDVCVQLRKVDQNGRILQQINIPSKDSGIEEPDVER  
INPLVYLGPSGYLRASHRLIDRDASIPSFPEHDYTEQHKVDPGTIVRLDIGFWQTAIAFDA  
GEGLLLKISGHSMTLAEFPALRGNESLENVGTHHVHIGGSHASYINIPLVTL

>383\_t gene=383\_g

MKAHFLCLVSLGHVCSLGSASSASGQLSSNPNGTATDPMYQLSTDPDFHFEILRVL  
GFAPFQGS DIGEVLIAANKIKHGD FESFHDAFYTIATQVHNQSTSIDVTKNPISARNAFFR  
ASTYFRWADFYLHGNWSDPRINALWDQQLAAFNSAIALLPFGQRVVLNESGLEIPTVFY  
GTGIPGPRPTIIMCNGYDGSQEEMYHYIGKAVLDRGWNVLT YEGPGQPTVRRDQDLGFI

PEWERILTPVVDYALTRPEVNPSAIGSLGLSFGGWLAPRAAAFEHRIAATMAIDGLYDYG  
PFTLSQFGPELEALFNAGNATAFNSIIDGVLDDPSTKTNLRWGIQQGLWSFNCKTPFEWL  
TAIQSYTLKGLTQNITTPVFGDSQNDLFFPGQAKQLADHLGDLATYHLFTNAEGAGEH  
CSTGAGVFQSQIVLDWFQDVIDSV

>388\_t gene=388\_g

MGSISPAPASLPRDFEWGFATASYQIEGAVNKDGRGKSIWDTFCHLNPTRTKGANGDVA  
CDHYHRYEEDFDLLSKYGAKAYRFSISWSRIIPDGGRGDVAVNEQGIAFYNRLIDSLLSRGI  
VPWVTLYHWDLPQTLHLDYGGWLDVDESQDLDFERYARICYQRFQDRVKNWITLNEPW  
IVSIFGYSTGGNAPGRSSVNPQSSEGNSSSTEPWIVGKALILSHARAVALYNKEFRSTQNGR  
IGISLNGDFFEPWDAQDERDREAERMEFHIGWFANPVCCLAQDYPKCMREQLGDRLPR  
FTDSEFALLREADMDFYGMNYYSQFARHRDDVPSKNDYLGNEELQENKEGVSVEP  
SGVHWLRSTPKLFRKHLTRVYRKYGKPIYVTENGCPGCPGEENMTVTEAVNDTYRVRYP  
EDHIEAVALARSEDGSDIKGYFAWSLMDNLEWSDGYGVRFGATFTDYDTLQRTPKQSA  
LLLKGMFEKFTPEPRICN

>399\_t gene=399\_g

MFSLMKYVYISVLLSQLTIAASPSKWKLNFKSLVTFGDSYTDSESRFGYFYSHNGSAPP  
VGWVDPVSNdTSSGGYIWARIVAFDTKVNLYDYAVSGAVCSNNITPRYISEINGDFPSV  
LEYEVPAYIGDSKFTTNGTSFLDIPPSETVYSMWIGTNDLGVDAFLTDSQVPGKTLPDYT  
ECVFSALDKIYANGARFFVLQNVIPQLVPLYATPENGGVYPNPNGTNTVTEVSYRMWE  
SVKTVNDIYKYQLPYELLIQNRYPGAQFALMDMYSIIADIYYPDQYLASPVNTGYIEQ  
CDANGVCSLAANQESYLWFNNLHPSWKTDSSIIAQRFEVVKGQSKYATYWGGR

>426\_t gene=426\_g

MALNSFPGSTPSHAQSSLPSLPSHLQSDTHLTAHLASRFHVSLPTARLSSQALICLNTYTSS  
TKGPDGGKEGSAMGEAEDLAKRAFTRLGARGENQAVVFLGETGSGKTTVRSHLLSSLL  
SFSATPLSTKLSLAAFVFDLTTTKSVTPTASKAGLFFELQYDSSSNPLLIGGKILDHRL  
ERNRITSVPTGERSLHVLYLLAGTSAAEKAHLGLESSGIHAVSSSNQKRWRYLGHPTQL  
KVGVNDAEGFQHFKTALRKLEFPRSEIAEICQVLAATILHIGQLEFVTGQSTTTGAEESGGY  
SHEGGESVTMVKNKEVLDCAAFGLSTEDLAVSLRHKTKTIHRERVTVMLDPRGARQ  
NADELARTLYSLLVAYVIESINQRVCAAEDSVGNTISVIDFPGFSQSANSSTLDQLLNAA  
VESLYSFALQSFFSNKADRLESEEVSVPATSYFDNSDAVRGLLKTGNLLAIIDDQTRRG  
KTDMLLESKRFENKNPAITVGESETKLPGSNFVTPSTQATFTVRHFAGEIDYPVNGLI  
EENGETISGDLINLISSTRSDFVRELFQDALQKVTHPKERSAVVQAQVSSKPMRMPSMA  
RRKISPSKLNPFNSRAGRDDDDSDGNNGSTKTGNTSRKKTNGPSAGQGAAGQFLASLE  
VIKQCLNAPNLNPYFVFLKPNDRRIANQFDSKCVRMQVQTFGIAEISQRLRNADFSVFL  
PFAEFLGLAEAESIVVGSREKAELVLDERKWPGNEARVGSTGVFLSERCWADIACLGE  
RVLPTYHADSLNDGDGMLHPGYSYDHRVRLSSGENSPSGAFIYGDESKQGGYFGSRDI  
DGRSDAGASAFNSGDMFKNLETRQMAEKSKERKMEEVDILPVSGSRKRWLFIVYLLTF  
WVPDFMIRFLGRMKRKRDIRMAWREKLAINLIWLSCLIAAFIVVAFPLLICPRQDVYSAAE  
LSSHNGKGGASSYVSIRGVVFDLDSFVPSHYPKNLIPSSAFDNYAGVDATAFPVQVSAL  
CQGVNGSVDPVLLDFTPNITGSATTISSADANSKYHDFRYFTNDYRDPWFAEQMMM  
LKGSYKKGYYGYSSQYLQTLAVKNGRSVASLNGKVYDFTDYVAGGRRTLGPNNITGPA  
GVSVDMDPVVVNLFERSGQDVTQRFNQLDMDSELRQRMQLCMDNLFFVGKVDTRN  
SVQCKFSEYFILAITALLASVIIARFLAALQFGKKNMPENLDKFIICQVPVYTEDEDSLRA  
IDSMARMKYDDKRKLLVVICDGMIIQGNDRPTPRIVLDILGVPDTPDPEPLSFESLGE

MRQHNMGKIYSGLYEVQGHIVPFMVVVKVGKPSEVSRPGNRGKRDSQMILMRFNLRIH  
YNLPMSPMELEMYHQIRNIIGVNPTFYEFILQVDADTVVAPDSATRMVSSFLADTRIIGLC  
GETALSNSRKSITMIQVYEEYISHNLIKAFESLFGSITCLPGCFMYRIRSADTGKPLFVSK  
EVVEAYAEIRVDTLHMKNLLHLGEDRYLTLLIKHHPNYKTKYSFRAHAWTIAPESWSV  
FLSQRWRWINSTVHNLVELVPMQQLCGFCCFSMRFVVLIDLMSTVIQPVTVAYIVYLIVW  
LILDTSQIPITAFILLGAIYGLQAIIFILRRKWEMVGMIIYILATPIFSLGLPLYSFWHMDD  
FSWGNTRVVTGEKGGKIVISDEGKFDPASIPKKRWEYQVELWEAQRSVDDARSEVSGY  
SYATKSYHPAATEYGPASRPMSQLDLTSRLGSRMSLAPSEMLGGAANYELTDLTGLPS  
DDAILAEIREILRTADLMTITKKAVKVELEKRFVGNLDAKRPYINSATEAVLSGQL

>427\_t gene=427\_g

MSNRFSIFSTSNPGLPKSTSQISTTTLLNSLHNSYSTGQPYPLEAGTSLVVNTWLTVSHL  
NPDGTPGGIVDPQLGQRAWEHARRRAEDGCIVLSALHRSCPTLLPSFLSVLPLSTPEILYA  
SLNAIRPFVTAVTPFNPSYSLYSSLAVSYFTLAGNVTGLTLALSKSGNLNTRGLLDVPAE  
PGYRAFDVFYYLINAESSQAEKEYLDLKEPSTYSILNKSGTYEPPSFLPTADDAEAEDFR  
SALKAIGIRGAAQRGLLSILAGILKLGNTLGFLVDEEELEQVCEEAELLGVNPEALLHG  
CSTDDRTVLVTGIYEALVDWVINKANEAIATQVKVDQENESSDGS GAPWHTEDASDTV  
TITVVDIPSPPLGKAAALQGVFNDEQGINAEMKEDDVEILTPGQSVITEMKNAVAEVEAD  
LGIIDSVAFREREHLNDRKQGVLEKVGVEVEIGGFLRDILFPDPNEGITLGRGRFDLAAT  
LGSSRVWYHLAVHPTDDTPETFAASPSTTPWSAGAVSRQLRDWRLPEWANRRHKHLDF  
TADFDVDEFVTRYAPLGCKEKGKDGVESWILERGWSNGDVVVGKERIWMREGAWWEA  
ESMLDLKPPGDMPINPFESGYSATPPNPNNGSGFFPAMPIADSSSFIASRDNLLNVNRQSTM  
SPGMARSIAPTNNQTLRSMGGGDYGLGSKGDDYKGD DAYYEAELSRLAGDAEFGQPK  
HIEKKKITMGRRLWTALVWALFWIPSFALRYIGRMKRPDIRMAWREKVVLVALILFFN  
GVMVFWIIEFGTLLCPNKNKVNNEQELSYNQGDNDFYVGVRGTVYDISKFWRTOHSDT  
TTTTASNMQWAAGQILDYFPVPLTQGCCAFVSNTAITLSHNNTDATPEVTAIHTSGPL  
QPVTDSALHNITWYADRFLPFMAQYYKGDIVWTRDTITNQANNDARYWVIINDGVYDL  
TDYFYTASLMNLDYDFLPSAVTTLIKQNVGSDITDKWQTSVQFQNALTCMKNVFYV  
GKVDFRQSARCTVNNWILLAFITVVCVILVKFLAALQFGSKPRPAPQDKFVICQVPAYT  
EGEDSLRKGDSLALQYDNKRKLCVCDGMIVGGGNDRPTPKIVLDILGVDPKVDPP  
ALPFRSVGGQSEQLNYGKVSGLYEFEGNVVPIVIVKVGKESEQSKSKPGRGKRDSQ  
VLLLNLNVRVHHRAPMSPLELEIFHQINNIGVDPELYEFLFMVDADTSVKEDSLNRLVA  
ACANDARIAGICGETSLQNEERSWWTMIQVYEEYISHHLSKAFESLFGSVTCLPGCFM  
YRLRTADKGRPLIISDKVIKEYSDGDLTLHKKNLLALGEDRFLTTLMAKHFPMTSYKFI  
ADAYASTAAPETWSVLLSQRWRWINSTIHNLVELAALKDLCGFCCFSMRFVVLIDLFGTII  
LPATCAYLIYLIYLVASHKGFIIISIVLLAAVYGLQAVLFILKRQWQHIGWMIYLCAPFI  
YSVVLPLYSFWKQDDFTWGNTRVIGEKGDQRVVAVEDEPFDPRIPLQRWDDYALAN  
NLPGRRGNTTEYGEEKQHMHYTDEAMEMDDFRSTYSSVKPASTILTGFPGRGPYMP  
QSPAPFGNNNRNSRMSSFTRYTDAPQLGGHTQRHMSMGNLSSYQDNPMNASRLSMP  
MMQSSDNLGVPGRQRSPLGGYGSRPVSTVMDFRTPGPHGPDHTIVEAIRQVLGEV  
DLDNVTKKQVRALVEQRLQTELTGDRRTFVDSQIDQELANM

>450\_t gene=450\_g

MASTATYHHQLNATFN GTTVDYAGFKINKFKGIKYAHIPARFEKAQPVAPEELSGKTID  
ATQYGPKCPQVDVDVRHLLRIPEDIEIEKEAEDEFELNLDVTVPANVPSGQKLPVLVWI  
YGGSAVTFCSAASGICDTRIVADSVKAGKPIIMVAMNYRLNLFGFGDGKGTAEVNLS

LKDQALAIWVRRYIEGFGGDESEITLCGESAGAVYVHAHLITGPPVKRAVLMMSGSLYLS  
PPMPHQLGKGVLEVCEVRAQDLEGKSLRDCSQRVFKQILTENNL SRCWMQEEDILANW  
ENRQEQVDELMIGETEFESVIWRRGIETLSPSDIISTFTASDPELGDKLRRAYHISADRPTS  
STLGALDLLHDSKFALPTELVAEKLIGNQKKVYRYLFDVNPWQASSRAHHAVDLLFIF  
GTMDYSHNPPAEVLGEDMRNRWINFVNGRKPWSEFSTTQKRFAFGPYGDCKEIDQRQF  
AGRRRAHVLGLLREVGPPQVYNGIANKLAAGKISLLN

>451\_t gene=451\_g

MSALLQTTYLGQIQGRNIDGVTHYRGIKYASLRNRLADAELITSRSSDEGVLDATKDGPT  
AASLVNGCDFEQSAIQQSLPKKELPQSDTECLNLNIAVPEGTTSASKLPVLLFIHGGGLNI  
GANSWPQFDWTRVIKLSVEKGVPI LAVGPNYRLGAFGFLTSEELRAAGYKANNFRDQ  
RTAIEWVHRHIRDFGGDPDNITLAGMSAGGGSATQHLHSTTPLCKRALSMSGQNILLTPL  
PYAVHEKGYETAIKA WGFDKLSPEERIKGIIESPAAELVAKLPPSVAPNFAIDGDLIPNPPT  
FAQISDKSTASYPAGKSWCKEILIGDAQHSSIFGIRLGFQAKNAAPRFISTLEKALSEYPS  
EIASSELLASYNISSTTPDKEAFEHILEFTNDVLFYAPVLAYASGWPEGDGNAVYVYFNEQN  
PWEGPFKGQSTHILDLAYFYQNFNDYLTPEQQGVARAFAEDLLKFVAGKAPWEPCKGT  
GEGFRARVFGPSAKQQVRRLVKDAYGGETQRRGVIPKLASEKGVKLDLDTGVFFAFLG  
TFSP

>454\_t gene=454\_g

MLFSKPMNRLNGVLT FILLIKSTLAGPCDIYSSGGTPCVA AHSTTRALYNAYTGALYQVS  
RGSDGATNDISPLSGGGVANAAAQDTFCAKTTCLITIIYDQSGNGNHLTQAPPGAATGP  
EANGYDYLASAIGAPVTLNGEKAYGVFISPKTYRNDATSGIATGDEPEGLYAVLDGTH  
YNTACCFDYGNAEVSNTDTGNGHMEAIYFGADTKTGSGGGTGPWIMADLENGLFSGY  
AAGNNDADLTMSRFVTATLKGE PDQWEMRGGDATSGTLTTL YSGIRPTGGYNPMSKE  
GALILGIGGDNSNAAQGT FYEGVVTSGYPSDATEDSVQANIVAAGYAITSLVSGPGLTVG  
SSISLRATTACCTTKYITHSGSTVELQV VNSSSTTALQQASWTVRTGLGNSGCYSFESV  
DTPGSYIRHSSNQLFLNANDGTKLFNEDATFCPMAGLNGQNSIRSWSYPARFWRHYGG  
ILYIAANGGPNTFDSTTLYNDDVSFVISTGFA

>464\_t gene=464\_g

MPSRILGQTI LVSCLMLALIYFLYQPSDAQPTAKSPRRSSRSDLASDARNSTLGF GAIFVIN  
LPPRTDRRDALALMSSMTDLKLDYIEGVVGSEVKDKALPPPASHTTQRSGNIGSWRSHL  
NAIRAIVENNLDSALILEDDADWDVRIHDQMYDFAEGVRALTMPLAGTTNSYADPSYY  
DPSKGGQPEELVFGQLPRTVKPQVSPYGDWDVWIGHCGTEAPNINLQDEEKAKKSQS  
IPRGRVVYYNDETVPQNHHLHVMEQERDPREIFPDHTRTTHVMGQICSLVYAVSQRGA  
RRILYEMGVKKFSDPYDIMLRDICEGVNDRPKGAVCLSVEPGIFNHRPVGPSAYHSDIS  
EHTAPPVEVAFTENIRYSARLALENYAIGSTELEDQWPKISSTSSYTS

>472\_t gene=472\_g

MQTQSLHRLHNSRSMWILVFAPILSLVLLYTWLRRPHSLLLDQFFVTDDAHIEPPLVISG  
DDKTNKNVKPEPIPGMDDILIVLKTGVTESLSKVPIHLETTLASVPHFVVFSDFEIEIAGV  
QTQDVLRRINETVKRNIPEFELYNRIRDHGREALTPADYGDDSNPFGFRQNNPGWRLDK  
WKFLPMIPAALEHNPDAKWYVFM EADS YFLWPNLVTWLSQLDHEQDWYLGYPMQIGD  
TVFAYGGSGFVISNPVMRKIVQYLDERPQTEIDDYTATQWAGDCVLGKVF GDAGVGLN  
WSWPMLQDNKPWEVDYFATVGDKRAWCFPVVSYHHMQPDDIQTLYEFDREWFSSNS  
TANPLLYSDVFHRLILPDILSPRGGWDNAADNAITKEDGSTVELTFDDCSKKCADDASCL  
SYRYKEDEKSCFISSAVKRGTA AEGVKS NW MIDRIHDKISEYGTCKTVDFIV



>492\_t gene=492\_g

MILIGCLFLLYASVSLQFHIPVASHRRDSVLSVRDTGDEIHSNRVAIVDDQPTDVHLGQH  
DAASKARLGERCGPGKCKCESYLCCSSAGFCGMTAAHCMSPDCQLGYGTCADRVPE  
GKSTKRIPRPHIGGVPYGEVIVTCKAPYTFAMTYDDGPSEFTRDLLDILDKYQAKATFFIT  
GVNNGKQGIDDFTCPWGALIQRMHYSGHQIASHTWSHQDLTDSRKQRKKQILHNEAAL  
RNIIGGFPTYMRPPYSKCEDCLRDMDQLGYHVISFNMDTADYLNDDPKIQLSKDIVD  
KELTGPNL DGRPYLAIGHDIHAQT VYNL TEHILQRINDAGYRAVTVGECMEDPRDNWY  
RWDYRSS

>505\_t gene=505\_g

MSLVPRSNVVIHPDLGIGGAERLIIDVALALQNRGHQVTIYTSHRDTSHCFEARDGTLD  
VRVRGNTMFPPLFLGRFHLLMAVLRQLHLTVSVLMEMGRTEKKDGVVEKYRDDIFIIDQL  
PACVPILKSLGERYSQFRGGRQRILFYCHFPDQLLARRDEGNLVLRLKKEAYRYPLDWE  
GWAMSASDRVVANSNFRTRGVVKR VFGSDRLGDVKIVYPCVDTKESSPAETEIVKGELW  
GGKKILLSINRFERKKGIDLAIRAYNGLSEEQRKGT RLVIAGGYDNRVQENVLYHQELND  
LAFELGLKTATSKTVISALSIPDSIDVLFLLSVPSAFRDTLLHNSKLLLYTPVNEHFGIVPV  
EAMHAGLPVLASNTGGPLESVLENKTGWLRD TTQVDEWTAIIRKV LLEMSEQEFAKMA  
ANGKKRVEDVFS LHAMEDKLEELQNMLKSNRRPFISLQYLMLAFLFSGIAGAAMVALI  
LRRMW

>516\_t gene=516\_g

MAVQRPRRRLRSFCLMLAALFFIFFSIYISSKPSTNNRFYNAHFTESPVD PFRGRQLAFWT  
SFREILDRHAPNCPSIVLEGSAPVTFNALEAGPRPDMVVL PDEHLEAMKLAHTEFVEEI  
HTSKIIKPIHTPGSRGLVSMAGGPYFPLFMAQLRMLRRNNSTMPVEVFLRDSSEYEDHLC  
EKVLPQYNAKCVVLSSELLGSTKHKGVEIEHYQFR TFAVLFSSFEVVMWDADCFPLYRV  
EDLLDSELFAS TGLVTPDFSASTTSQ LFYQISQEQEIPMTLRAATKTGVFLISKKTHFLTL  
LLAAYYNYHGSHYFALLLQGAAGQGDKEAFIQAASALKEPVYPVSERVSALGHTTESG  
DFVVSAVAQADPIADYQLTKEGTWRVKEPDAGNPPRVFFI HASYPKFDAADNIFGFRWD  
GAPDFIPGRIWTADTDAIQRFGYDAERAYWEEVKWVACNYENFFRAW GSKHGVCGNV  
QERWRYLFQSPSEDGLKFGETESERERSA

>527\_t gene=527\_g

MSHFTIIAGLATSLLVVSAAADPWPKRGLAANDDIPYEFGGSWNGYNSEVNWQYNWD  
STTSQKQSFAEFPVMLWGTSSDHTSQWFENAWYWLDN GGSGHLLAFNEPEQSGQSNLT  
PQQAADAYR TYMEPFAGHASLGAPAVSNDGYEWLSEFLQACSDCTIDFVPIHWYNDAS  
LESDLNWNVNSICSLTGRQVWLTEFQALGSIDDQSTFLRSAIPFLDDNDCVYRYAYFGTA  
DNSKV LLENGGPSLSPLGVQYTFSAYGNGNGPS

>539\_t gene=539\_g

MLLGFRFQLLIALIGAGASITASAETSSTCDALCLETVQNGNSWEIDQHASTDFSFYQTPS  
NFSSKLSPGSILTVEPVTELANYSIPSGLTMSRIIYTTNDQNGTTLPTSAYILWPYTPLEVPG  
KGYPMVAWAHGTSGVLRGCAPSNYRNLQYHFQAPFALALQGMVVVAPDYAGLGINTL  
PNGQKIGHPWLN GPAQANDLANAILAARKAFPSILTANGPFVAMGHSQGGGATWAF AE  
KQVKEPIAGYKGSVAIAPTTRTIDHLKDAFSNITEPWAQVIIAGQPKLISAVTAAFPAYNY  
TGLTPVSYDRWFNVLEPLDGCLPTDTLAFTNVTTDELA VPNWYESPTVQEYAKLSESGR  
KQFRGPLLIISGEADIVVPLFDAVEPAVDDTCTMLKQGHWSESELELV TYSAMDHFPSIQA  
SQMKWLPWIKDRLTGAPAPKAGCVKSAVNGFR TDDTFQTAYPNFLEGWASVEESWKY  
GL

>541\_t gene=541\_g

MRAFWLTALLSSSVLGAGQDNEAYSPSYPPSPWGDGKGEWADAYKKARDFVSQLTLA  
EKVNLTGTGWMQGSVCVGETGSIPRLGFRGLCLQDGPNGIRFSDYNSAFPAGVNVAAAT  
WDRSLAYLRGLAMGKEFNKGVDIQLGVPVSGPLGRTPEGGRNWEGFSPDPMNTGVMM  
AETIKGIQDAGVIACAKHYILNEQEHFRLVGEAKGYGYNITASASSNVDDRTMHELWY  
PFADAVRAGVGSIMCSYNQVNNSYACANSYTLNRLKRELDQGFVMSDWGAHSSGVS  
STLAGLDMSMPGDTSFDSGDSYWGTLNLTISVNGTVPAYRIDDMAVRIMAAAYYKVRD  
KFQLPINFNSWTRDEYGPYAAVGPYGVGKVNERRIDVRGNHASLRKIGAASIVLLKNT  
DGALPLSGKEKFTAIFGSDAGADPVGINGCADHGCDNGTLAIGWGSSTSNFPYIVTPEDA  
IKQEILSKGVGIVDSVTDDWAYDKIQALASQANVALVFNSDSGENFIVVDGNEGDRNN  
LTLWRDGDKLIETVASRNNNTVVVIHSGGPVVLVDWHDNSNVTAILWAGMPGQESGNS  
IADVLYGYVNPGGKSPFTWGKARQDYSADVLYTPNNGVNPAPQIDFTEGLFVDYRGFDR  
ANVTPIYEFGLSYTTFEYRNIKIRPLRNAAPYPTTGFTIPAPAASNFSTDWSDYLFPGF  
IRRVPLFLYPWLNTTNPAASSGDPDYGLQANEYLPENATSASPQPLGAGGAPGGNPGL  
YEEVAIVTVDITNTGSVLGDEVPQLYISYGGPDDPPIVLRGFDRLRPQETKEFSVVLTRR  
DISNWDVVSQDWVTRYPKTVHVGVSSSRELWLEAGLPGLF

>567\_t gene=567\_g

MVAPDAIKPWLRAAPSSYVLTNANVVDVLTNGTILKNCSVTIKSGIIESVIPNSPKVTQKS  
STQKIIDCKGKYLCPLFDAHVHLMVAVPGFTDLSKAFGNPNDVHLLRQPYVCAQMLHR  
GFTSVRDCGGAHLALKEAIEDGVWPGPRLFIAGYALSQAGGHADYRPHDHTQCCGLG  
TTGLGRVCNGEAECMTAVREGIRTGSDFIKIMASGGVSSPTDKLEHLQFTPREIRAMVEC  
ADQAGTFVTAHAYTPKAIRHAINNGARGIEHGNFIDPDTAKLMVEKGVYLTPTLITYAE  
MASPNWEGYLPISQTKNTEVLQAGLTALKIAAEAGVKMCYGTDLLGPLGAAQSKEFK  
LRASVLSPLRVLQSATINPAEMMGCADTLGQIQKGFADILLANPLEDVTILDDPERSI  
LAVMKEGRIYKSRWEGVEEDAEIPVRVKAAL

>596\_t gene=596\_g

MQSNLFLVLTALSTVSAARSVLNQTQTPISPDSTTTEKRGRSCDCYSVSGPDPGYFQHH  
KFWDFRQVPLNALAAKDFHFQPATQADVAATQQNIDFNAAPILLKDTFPAADWLIQDW  
QRSGSLLFPIPIANSNKNAFLTRSLAGGSSFLAMRTKRFEKYSSTAEIETGIRNFMHVSRV  
RLRILDNNEPILSPPLENTALGKRNDLTDMRIQEDPLVQRIVSRLPPSTGACVGFITFFS  
RTSESDIEILTSDPPNRAHYANQPDYDPIRNVVIPGSQVAVDAHVPWTTWSTYRLDWFPG  
MSRWYVENQLQASLAYGVPVDP SRLIVNIWSDGGLWSGNLTVGDSVHLGIEWIEIAYNL  
TGEAPRPCNTVCRIDNVVRPGVPEM

>623\_t gene=623\_g

MSSLLTVLLTLNLPQQGHCHVHQPRQVASSIASINQSTWNAFNATVSGHLHNGEPMMA  
CYTDYDGLLKIPEVAECSVLQSERSDTASVSDYFGGYINVNWGSCQATGQSCALSSLLN  
PDTITPVTTECYQGSVPSKYVNVQSVEDVQNIFAFVQEHNLRLVIKNTGHDYKGRSSAPD  
SIALWMHNYQPDIVLETSFTPDGCSAAVGDVITFGAGQEFEGIYEFASHNRYRVGGSSS  
SVGAAGGWITGGGHSMLSNELGLVDNVQQLRAVLPNGTYVTANRCQNQDIFFTLRGG  
GGGSFAVIMEMSTLAHPESTTQVAEVTFASLSANNATEFISLLVANANMWASQGWGGYI  
QPGLVGSQVSSFIMATSLLNHTEAVISMQPILTFVSRFGTLANASVTTFDYFDVLA  
TGLSAVPAGGVAISSRIVPRESFLGLKNQTELSTILNGIITNEVENLVSIVPLFICVTAPTL  
YSQNLPMTDLPGGSGAASVTPAWRTGLWHVIHLRVFDGTTTEPAIVNAIWQAHDMD  
PLRAFTPDSGAYQNEADPFETDPINTFWGADNYNRLLSIKREIDPNNVLTVHQVGVWDD

TDIRYSCYPDVIA

>633\_t gene=633\_g

MKLPSSLSDILLLSNIQITVALAYTPDQVGFNLNENKTAANPLDYWGQWQDHEYHPS  
SNWRMPFYTVFLDRFANGDPSNDDANGTQWEHDILSNQLRNGGDVRLIDSFDYLQGM  
GIQGLYIAGMPHINQPWAADGYSPLDLTLLDRHLGSIDDWRLMIAEAHRRGMVVMEN  
TMATMGDLIGFEGHLNNSAPFSSHGYDYLWKTSTRRYHDFQPGNEWLDECEWEYPRFW  
DDSGSGVIETNLTRGCLDSEFDQYGEVSSLGDYPEWERQVTKFGFVQDRLREWRPDVRR  
KLELFSCITIAMLDVDGFRIDKALQVTLDAQGDWSDSIRECARRFNKNFFIPGEIVSGNS  
FGALYVGRGQQTNTMDNMTEIITMANASVPGLHLRSSAKVALDAAVFHYTVYRALTR  
FLGMDGVFEAAGDPPTNFVELWNGLVQTNDMINTNTGEFDPRLHYGTSNQDVFRWPSI  
TYGVERQLLGLFIVSLLFPGMPALVWGEEQAFYILDSTNSNYVFGRSPMTSSLAWQLHG  
CYKVGSIKYNNFPTDSALHGCLDDGVSLDHRDPTHVVRGLVKTILEMRQNYPVLDNGFY  
LEQLSNMTHDIYLPGSNGTRTETGLWSILRSRFAPTQDFTGQQGNQSVWL VYHNDNVT  
VNYQFNCSDEQRALVSPFDSGTTIKNLLPPFEEYDLQTSVHKLGLDGSMEANGCLSNMSL  
PAYSFKAFVPKYAFVAPSSYITNFEPGHDARILSTVTTGERVPIRFTFSEEMDCDSIVSRLS  
VTSTAMNGEVARFDNRSISCHSLPESQPATYQGTFFGIFNFSIELENVFDGIHEIILSNATSR  
DQNHSTNSVDHFIIRIGSQENPMVWPKNANYSRSLLYSDDANIGTLRVSHKAPGADQWR  
YSLDFGSSYSSWINYTSSNVSIPPKNWTGTKLQAWQGEHIIVQYWNRTGSSNHYQHGD  
LDWDNKPSRRFPHLWIQGFNEFGYDSGYSSQMHLRNTTGRWEYNLMTEWPTQLSLN  
AWGMNEDGHPDITQVYGDIDGDMILDRIRPISLMINVINTEPPPWPFLSWKLSLDDGNL  
KMSMPHGSQKTQVVMFVLLGVFPPIAILAVWIYFKVFYQVKRIIFGVTRQSFCTHAQQ  
LTDHNTTEISSRIDNNVSTFVNMLRNYINRSPTQLTHNRALNANAGECRRTVLIATMEY  
DIEDWGKIKIGGLGVMAQLMGANLGHQNLIVVPCVGGVDYPVDEVAEPMKIKILDQ  
SFMVHVQYHRLWNITYVLLDAPIFRAQTKSEYPGRMDDLDSAIYSAWNSCIAETLQR  
FPVDLYHINDYHGAVAQLHLLPRTIPCCLSLHNAEFQGLWPLRTPPEYGEISRIFNLNPLI  
VKKYVQFGDVFNLLHAAATYLQIHQSGFGAVGVSKKYGKRWARYPFWGLREIGSLP  
NPDPSDCVESNQDALATEAEVDPAFETMRLDMKTEAQRWAGLEQIADAELFVFGVGRWS  
LQKGIDLIADVFPSSIMESSPITQLICVGPVIDLYGRFAAIKLSKMMEMYPGRIFSRPQFTAL  
PPCIFSGADFALIPSRDEPFLVAVEFGRKGTLVGSRVGGGLQMPGWYAIESMTSKH  
LNRQFKQAIYEALNSSASDRAIMRAWSRRQRFPVAHWIVNLEVLHLNSIAKHKRHSKQE  
DLCRPSSMPIEFLRQIGHYRKPASQRTEPHRTVISQAIISLFGVEHENSSTDENNSQLAEGIV  
SVDHQWPLQVPGSINYPSSSEISDIPSTSRQSGNESSRNSTAVSLEGNSKNISVFDQISALPA  
YAINSHLSLRDQSRNSSLSLSDVNIIRENRTLNLQKVNPFFTDSSGRYALRFEKRLARL  
NGKNSDQFCIEQFLSKSEKEWFKMYRDMKLGRTLTPSRAATSVLSPITHITSSDEIIGHGI  
STDPEKPLEGADMSKEELKLPEGYVPPSGLKFKMLCRVGDWPVYSILLSFGQIIAANSYQ  
ITLLNGEVGEPAEKLYLIATIYLVFSIVWWIVFRSLRSIFVLSIPFLLYGLAFIFIGISPFVTA  
SSLGRWWIQNVATGLYAAASSSGSLYFALNFGDEGNTSAGSWVYRACVIQGTQQVYVS  
FLWYWGSRLLAAQSQVGLTRTSLADSHPVLLTGVLGLGIAAIMWIVGIVLFLGLPEYYAQS  
PGKVPAFYKSLQRRKIVLWFYAVFIQNYWLSAPYGRNWL YLWSSKHAHSWMITVMV  
LIFFIGIWAIVLWVLGILSKRHTWFVPIFAIGLGAPRWCMWLWSTSNIGSYVPWAGSAVA  
SSLVGRGLWLWLVLDALQGVGFGMILLNTLTRFHIAFTLLAAQVIGSIGTILARATAPN  
NTGPGDIFPDFSAGVRDALSKADFWLCLMFLSVNALCFMFFRKEQLQKP

>651\_t gene=651\_g

MILLLIITGFFSLVCSALPVNEALPSVLDNQEYASSLALRDTEYFTLRIMPLGASITQGYL

SSDNNGYRKVLREQLRYSWVPMVGSLEDGTMLDNNHEGHVGYRIDQITAVVENNIS  
EMPNLILLNIGTNDALQKYDTSAGERFDSLLTFLYGAINSTTIIMSTLLPNTVEPDLVAEI  
NEQYHDVYDNREAAGDRIVLADMYTFLTTDDLQDGTHTPTDYGYEKMASVWWSAIQTA  
LNNNYLSAPIDTGVSDFPNNTCEQTYDSSSTDNYAQTQDETGTDDGNYVHTSQDMGRL  
LDIASVAEDIYQGVNLAQLVNVYGAYRENALDELVWTHDGDGTYMFLNENSGNFGPSV  
ELDVKIPCLAKGVHWGDVNDGLDDFICIGADGAMYVAINQGASNNVPTFEDIGQVMA  
APGGNMTQTNVRLGDIDGGRIDYCLIANNQDIQCWRNGGQGDAPTSTYGGYWQDLGI  
VFTGKMGDIAGVRFVDINGDFRSDWLWVDDTGKVTTYINNRGTGKGLVPEWISAGV  
THAGMGVAGARDRVKFGNVYAGNGADYLYVESVESASYASIYDNYAHVWKNTGHGG  
TTLKGDGDYCDMRGTGMDDYVWISPDGVGYLYGNTLKPNNWDPAGLEIFDTATERK  
ALHLADFNGDGKCDLWLVDRATGAAEVWINNWDSSMTNWDKRGVVTGEATCTQGW  
GVGLYDIGLRFDDINGDRRADYLCMEPDGRTTGALNLGENNFQDIGQIKHSEGYDRANH  
QWADVNGDGLVDFLWVDKFSGDTSVWQNAQMPNGTLIDGSSFQWTPLGARYEGED  
RGANIHFNPNGGLGRADYQQVIPRTNVAYTWYNVCPGGGISALDDESASIDPDLPAYSGS

>653\_t gene=653\_g

MGQSVFQIFGFPKSVNYSISHWLQSVQDDPLLQHRTPPELPRSADIVIIGSGMTGTTIAQNI  
VRTWPEKKVILEARLFCSGATGRNAGHCKPDQWRGFKNYEKDFGTEQAIKILQSEQQT  
WLQVVQYIKENNVDCHEWSDTLDPITPRAARIAKETFEQYKAAGGKVDHIKVIDPE  
EAAKISQVKDAQACYAWSASTLHPWKLAAHIMRDNIEKGINLQTNVVS AVIRSEQHQD  
KWVVKTDRGDIECSKVHASNAYSSAIEPSLRGLITPYPHMCNRVAFPKDSKNLSALKG  
SYGILLGQDNLITINPRLNGDGAILFGGSNPGQNEFWKWLEKNPYRYIDDGMTGFDSISK  
AIHEFAVEELKGWSTEEIMKQEETYKNAWSGILGLVSTLLSAAIPKLITLRFRAQTDFPS  
LGSYLDFRASGFVLGTMDCLEVEDPVTRTYRPRNYVEGLEKRVAFLENFLKQCHPDLTT  
SDLVEHHGSQPEYSPNSIPSAQQHIERPNHQVINQSGSSRAKDDNIQEDDNGVEKLASKV  
GLLSLSAAGAEPQYLGTSIFAFSRLINSTLRQVVAPDLATTSALDTTAKRSSLLPLPCLLP  
DYISAVQLSSVYFQNVNTHYPFLHEATFREWESMLREESAGLETCPPSSISLFFLNMVYA  
VGALLPNLGYSAESLYMSALMYIDDILVHDNLEAVQAILCCAIYSLRSPTGTSHWKLA  
GLALRQCIDLGYHRNTKHFSAPTDVLRaelRKR VFWCAYVVEIQAAVMLGRPLGIPYQE  
IDAEYPIDIDDSCITDTELMGTPRTSPSDAPNNMTRAIHTFRIRLLSRIHThLYSRPDPRCF  
GKHNQQIDVQNIRAEIEKWRAEIPPTPSHANEELVLFTEWYDLEYNYTILQLYRAQIID  
HRAETTDGAFLDVCVAAESICQSYRRQFVGKRQCTWTALHELFLAGLTYLHCLWTSSA  
AQEACGYGKANATCNDCIITLVVMAERWDAAPYREIFIALANRTMSMMSERIVESASR  
NMTSAGPENHDKEDVTEWMRIVADAGVLQGYNGLLTGLTRD

>661\_t gene=661\_g

MHNIGQASLCLVLLTLGTVWAKSTPPYKNPHLPVEQRVADLLGRMTIEDKMAQLMQGDI  
TNWMNQTTGAFNSSLVANMEEKAGSFYVGYPISEWMLTSNIQKGQDYLIHNTTLGIPA  
LVQSEGIHGFLIGNATIFNSPIGYGSSWNRDLVQKMGQIIGQEARALGVTQLFAPLADLA  
RELRYGRVEETNSEDPYLAGEIAYNYVKGLQSQNVSATVKHYLGFSNPEQGLNTGPVH  
GGQRELRTTWAPSFKKAIDAGAWSIMSAYHSYDGVPAVADYQTLTLLRGEWGYEYW  
VTSDAGATDRLCAAFLRCQDSPIDSEAVTLAVLPAGNDVEMGGGSFNFKTIPQLVASGK  
LNSSIVDTAVSRLLRKAFEMGLFETPYPGAPADKWSDLIHTPESLQVARELDRESIVLLEN  
HNSTLPLKKSgsIAVIGPMAHGymnyGDYVVYQSQYRGVTPLDGIKAAVGDKATINYA  
QGCERWSNDQSGFDEAIEAAKSDVAVVIVGTWSRDQEQWLEGLNATTGEHVDLSDLS  
LVGAQAPLVKAIADTGIPTVVVFSSGKPVTEWISNSTSALVQQFYPSEQGGYALADVLF

GDYNPSGKLSVSFPRSVGALPIYYDYLN SGRSIGDSGFVTENDTIVFGHQYVIGSPLPWYE  
FGYGKSYSTFN YGTVNLDKTNV TATDTVTVSVDVTNEDTSRNATEVIQVYVVDEYASV  
VIPNRQLKGFDKVVF GAGEKKT VQISLDVSDLGLWNVNMQYVVEPGAFNVLVGSSSLDI  
RGNATFYVS

>662\_t gene=662\_g

MKYL TSLTLASLTGLTLASSAGDISKRAEFCGQWDTATDGN YIVYN DLWGESSATSGS  
QCTEIVSLSGNTLTWFTSWSWEGISYDVKSFANA EYTITPKKLSAISSIPTWKWSYTG SN  
IVADVAYDLFTSSSSGSAQYEIMVWLAALGGAGPISSSGSTIATPTIGGISWKLYSGPNG  
ATTVYSFVASSEQTSYSGDLLAFFKYLEEYEG LSSSQYLLSVQAGTEPFTGSGAELYSTYS  
VTVN

>670\_t gene=670\_g

MVSKTWNVGIIGYGFSAKIFHIPFITAVPDFKLYAIVQRTPTPENDAEKDFAGIKSFRSTDE  
LFKDANVDVVITPPDGHYALAKAALEAGKHVVVEKPFVPTHKEAEELVGFAQKHNK  
LLAVYQNRRYDADYVTL SKLVKNGSLGRVVEYETHFDRHRPELATSTTAWKTKITEAG  
AIYDLGVHLLDQAVHLFGLPKRITAFVGSQRVNNPTGLEDSFTLLHYDSGLLVTKAA  
VVSPEEKQLRFWVRGDKGSFKKFHLDIQEDQLKAGVRPGDSGYGLEPSDRYGVLTIDQ  
NGQPSAEKVPTVEGPTWVEYYRKLARALAGESEL PASGAEASQVIRLIELARESSKLGKT  
MEV

>369\_t gene=369\_g

MSLRRTAAHSPALTSKNLLVPLIDSPLPSPVLPSIIPSHGKRPPGGGKRKA FRIFRLLAVC  
AIIILIRTPLSHLRVLGLVQRWVDDRNYQLPSTLPVTASPVIMTNEQGRRKWTVHIPA  
GMEFPLSPLQIADLSSQCFQMSQQVSDGKYQPFDYSRSDPNFIDITDRQVARQVTGLLST  
EKTVMQKRPNPYCDSSLTFVMQSEDA GLGTTLMNLWISYGLAQKQGRKFFIDDTNWAY  
GKFSKYFKSPPKPKCRQPPAYRLPCPLQTRHLVSSSNAPWIFGENFKEFFKSHFALSEP  
RQREIFEMARSGYEALFHLVGEDASYLQQR IQGLNRDVR SKGGIAIGIHVRHGD LHPLEP  
QYKDSYIPLDVYAKRTSTIFHAHLQQAHGDTALSQSMASHSKVMLASDDPDVYTSFELG  
GAERAQSYIALASKSALDAASN EGVSNEHVGWEGGFFQDMFWSLGVKASDYSELGGPF  
PSNRGPTEPKTLSVESVAEQRLRPSEESLQVREWIGRAYLLDVAVLGQSDRVIDCVSSA  
SCRLLAVMMGWKKAITHKSWQNIDGNWHWSFVIP

>724\_t gene=724\_g

MGLSSIFVAVSALLAGGAYALPKADPVTDIRDENITLARRSEAVNYNQDYIASGANVQ  
YSPNLGAGSFSINYNTQQDFVVGLGWQPGDTPITYSGSFSASGVGILAVYGWTTNPLVE  
YYIMETHDGYQTVGTHLGTVTS DGGTYDIWEHQVNQPSILGTSTFNQYISIRQSPRTSG  
TVTVENHFQAWANAGLQLGTFNYQVIAVESWSGSGSGQISVSKGASVSPTSTTTSPGGG  
TTSTTAPSSGGTGS AHWGQCGLGWTGPTTCQSPYTCTTLN PYYSQCL

>729\_t gene=729\_g

MQWRQSVFALLLTLSPALAIWPAPVNITGKNVLWLEDDVLVTYNGKPLTKEATSEPSS  
NEEVLYAGVQR TLDNIFHNSYVPWKFYPRNALESTEPSVEATKTHIRLLNITLGREDNTD  
ESYEITITNIGSASIEANSKFGVLHGLETFSQFFAKHSGGGIYTIQAPVRVSDKPMYEHGRV  
LLDVSRSYYSMDVIYRTL DAMSWNKLNRLHIHVTD AQSWPLEIPSIPSLSNEGSYSSETV  
YTTTDIENIQKYGSLRGIEVYFEIDTPGHTSSIAFSHPELIAAFEAPYILYCNEPPCGTLRL  
NDSAVDTFLDKLMGDLLPRLSPYSSYFHTGGDEVKYNAYTLDPTVGTNNSDIINELLQRF  
YNKQHARVRAAGMKPMVWEEVPLNYNV SIGSDVVVQTWLSAGSVKTVTSLGNRVIDS  
GYDYWYLD CGRGNFLNFNGEDYQMNYPFSPWCDPFKNWILVYSHDPSAGLTKNESSL

VLGGEVAVWSESIDDVTLDSLLWPRASAAGEVLWSGRIDPATGQNRSEVEASIRLSQFR  
ETMVARGVGASLVVMPFCTQGMNGTICEVSA

>732\_t gene=732\_g

MITTPLLLIGIFYFGTSTASAPTSAGIACTNLTTSLGSGKVSSNPLDLRYIASREDYWNAL  
QSVYQPSCIVYPTSAQDVSIALQAIRVSNRFAVKAGGHNTNFFSSVDNGVLIDLSSLD  
AKTYDPSSTLATYEPGRTYGELYDYAQAQFGRITLGPVGTGAALGGGLSYLSPQYG  
MACDDFRELEVVLPSGEIVVASPESYTDLFFGLRGGGGNAYGIVTKYTVQSRPVGQFFA  
GNLVYIFEQNDAVADAIQSFMQYNPDPKASIIATYKLPDVLNLDEAILMFLVYDGP  
DAGDLFSNFTSIPYVLTNISIKTYPEVINMPIPFLTELTRGDNTFRVGVHRVVNDDSYKTII  
DAWRNWAETNKGSYELLTFDYEPVPSKLTASNGQNGGNAMQMPDGPWYWIGYILET  
PPGMSQVDYDAVQTSFADMVDSVGNADLPLFVNDASFDQNPLATFSTYSDLQIQKAK  
YDPDGFFSQKTGGWSFA

>736\_t gene=736\_g

MSFPEHLPDWNLLKVIHKGTLPPRAHFYSYVCDEKALTLDRQQSEYLSLNGTWKFRHD  
ESPFEAPDWENADPLSWDDVKVPGMWQLQGYSHPTYTNVNYPFHVNPPHVPLLNETGS  
YWRQFVTSQTDWGQQIRIRFEGVDSAFHLWINGKQVGYSQGSRNPAEFDITTLHPAGS  
ANTI AVR VYEFCDGSYIERQDQWLLSGIFRDVGLLAFPKEIIDFFAVPTLSDDFSSGELTI  
SVKIQKKEGDLQAKLYRTDGTLLKDFSTTESHTIQVLGEDLKLWSAEHPVLYTLLLSF  
KGR TIPQRIGFRRIEQKDSNFLVNGKPIILYGMNRHEHHHLYGRAVPYECMRADLILMKK  
HNINALRCAHQPNPRLYEVCDELGLYVIAEADLETHGFDPVERNNIKQHLMTYEYEQ  
ETSYKMAKKWTSNPAWKDAYLDRAVELVERFKNFTCIIFWSLGNEAFYQGNHALMY  
KWIKETDPTRLVHYEGDRDAVTADLYSSMYWSLDTLKAHIKEKTDKPLIQCEYGHAMG  
NGPGLKEYIDAYRSEKLLQGGFIWEWCNHGLLKR DGDTSYYAYGGDYGDPE NDADFI  
LDGMVFSHSPNPGLEVEYKKVIEPVTVQLKGNQLELKNHDFSTLDHLTVSWHIVNETG  
KTEPISWELPEIKPGQSKLIDLPGVSLGPDASWLALNFCLRNSTVWAPAGHEIAWAQVP  
LFEKQVLSIPSPGSAKSTLSISEGPGRLYIASEAFASRFTYDLVRGNLSWSTDTGKIFNSG  
PQLGIYRALTQNDLGLGPHIEWERFRVSTRMLVQAVTWHCND DGT VNIQTNRVAP  
KVLEWALEATLIYTITDSSVNLHVKG GFGSTYPKYIPRVGLTVRLPRRYDASTWFGRGP  
ESYRDKKSAARFGKYTASLQDGLQTPYEWQENGR TDTHWARIHSSSPDVSYAASAE  
ALAPVPELEVRMDFPFNFSLRQYSIAELDRAKHPHELSELVDESELNIDFAHHGIGTASCG  
PGPFDGHRLEAGPF EFTVMFRLIDLK

>743\_t gene=743\_g

MIYGYNSKLSHGVDITLDYGRGLMEEIKRIRNTKELQQRPLFFIAHSFGGILAHCLIRAI  
STMEEDHPAIASLHQATRGMLLFAIPHKGLVMDDIQQMLAGDRPHLREPLLQQISRTL DL  
LVDLLADFKNLIRDRNVVIFYETEQRQLVFDPGSSQWERTGKVITGNTNSAILQLPDY  
VKDRVPLHADHSMIVKFDTRNAFGYQIALNKL RHFVQDTPQVLGARSSASLLQPCSTVP  
FERDPMFVGREAVISAIKEIHGAIGQHHQRAALVGLAGVGKTQIAIEYTYRVRESTPGTW  
VFWIYASNAARLEEGFQHIATVAEIPARDDPKINIAQLVYQWLC DPRNGR WLMILDNAD  
DDSIFFKGNASDERGPLVSFLPQAVHGSILITSRNGIAARNLVGSEGHVIAVQPMNKEESL  
ALLRARIPGPQSGEDEKALVQALEYIPLAITQAGFYIANRSPRVTVSRYLQLLHESESNQT  
YLLQHEEAKDLRRDPSIRHAIITWQLSFEQIRHDQPAAMDLLALMSMFDRQEIPESLIRA  
NGDWLQFEDAVGPLIGYFLVRVEIETTSFDMHRLVQLSVRRWLEIHLELARWRKKSRAI  
MALTFPNGQYENWTECQRLPHAKEVMKTISDDEEDRLHVATISFHCGWYLR LR GAYE  
EAEAMHRRALEEREKVLGREHPDTLASVDNLGLVLSRQGRYGEAEAMHQWALEAQEK

VLGYEHPSTLTSIDNLGLVLSSQGKYEEAEAMHRRALEAREKVLGLEHPDTLTSVNNLS  
LVLSRKGKYNEAEAMHRRALEAREKVLGLEHPDTLASVNNLSLVLSRKGKYNEAEAM  
HRQVLEAREKVLGLEHPDTLASVNNLGLVLSSQGKYNEAEAIHQRAKAREKVLGYEH  
PSTLASVNNLSLVLSSSQGKYREAEAMHRRALKAREKVLRCHEPSTLASVSNLGLVLSSQ  
GKYEEAEASSFSELPFQRAATITTTTSQYVSDRIFSAEQMSSLETQTSLPSELEDVQTVFSG  
TFTMKGALKEIYIDELVRELVRSISSFQTTPLVVRVVAEVMPCDKAFSLRLESFKSFQQG  
HLDVTA FIRKYRQDISDAFTKAALDDSSVNDAAAGDSSPNETIYNSTTSWETRANVPLH  
DIMTHWLRYEQDMNDNAWSPGDFNLHPIEDKDKDIDTNSGAKTDEALDPVMPPELKK  
YRECIFGNPAYEWFLRDLQKHCDLVPSSPDLSEIRKAILQALPSQTTFTTRQEPSNSYKMT  
YNMDWDLVTFLENEQEYSEESHQALPLVITVTGSREAAQALTCQYLHQWVSSAAGILD  
LLQTLFLLEKNKATGDLPGTKLAAWLYFSERLRVHRVAVEVVGSTYSVIEVGELLSW  
LGSALQLSPYPDQIAYCRPRVSQFQTIIRSHGKEESQYAAEGSAEIEFTIDKKGHSPSINGE  
CWHGLFRNCVVVEGYPVSRPEEGAINGLEIPLGMMASLAQAKYVNNFLGVPIFKGFSA  
MLVPTDVHNELVSWHLVYNKNGDRISYLDGVTTPAQGLMVGRLSQTRHVLGWCSDAR  
YLAGTKDAKYEVGRSRLPKPRENGIFGQTFISSGQMITGGAPFLVGYKDTPFHVSRAGYI  
RKLKWIKKSVVLWDEETKRGWLLNAASALLHLVRASIMHDSTGPLSSECLFQWEKLEE  
APADTANVPGSAIKVLLNHNRRALKIYEGKNDLVKFEDRVEHFLNMLEQIFDYEVYAV  
GPDGDGYNSKSIPRAHFEGWDFHDLATESDPLYPRLANMAPKGKAWIDFTRSIHAINLL  
GSDFGIILEPLNSSCPHWASLPKGQYLAAGIADLRMIVEYTGDLTANPIRLNENLVWH  
NPERIFHFRCRCV DATASYTDIVQYDLRQEHNNTSSVGSKSDYAPLSSSDVPSVEGTIQTSS  
VKNESTKPKSLRSYTRWNLETTRAEDYAVGIVCALPELLAVRALFNQTHPNVQFSAA  
DTNHYALDRWGRHRVVAACLDPSEYSTNSAADMASNLRRSFPSVKFYFMVGIGGGVPS  
STNDIRLSDVVVSKPIGITPSVIQYDMDKALKNGVFKQNGVLHAPPRLIMTALS NLKSNP  
YLSENPLKEYINEIRACRKEYQYPGSHRDLFSSQYLHNSRHVTCDRCSDAHVIVRPIRSN  
PYPRIHYGLVASRNSVIKDAILRDKWSTEKNILYFKMEAAGVMNILPCLVIRGICDYSNS  
HKNKSFQEYAAATATSYAKLLLSYIKDSSEMDGIALRSIRDDQSLFDAFRRALTLFPMHG  
T

>786\_t gene=786\_g

MRLFFCLLALLGSMLATAAPTQGFQFSQVTGNWGSNPTNTGFYIYVPKNLASKPGIIVAIH  
YCTGTAQAYYQSTPYAQLAEQYGFIVYPPSSPYSGTCWDVSSKAALTHNGGGDSNSIAN  
MVTWTTSQYNADTSKVFVTGSSSGAMMTNVMAATYPELFSAAVVYSGVAAGCFYSAS  
GQADAWNSTCAQGNVDASPQTWAGIVKNMYPGYSGSRPRMQIYHGSIDTTLYPENYNE  
TCKEWAGVFGYTYTAPQQVETNVPQSQYTTTTIWGSNLHGIFATGVGHTVPVNGARDMQ  
WFGFA

>787\_t gene=787\_g

MFNKAAVAALTTALFFRAYAIDAEITVDLQTRYQSVDGFGCSQAFQRAEDIFGKYGLSP  
KNQSYVLDLMYSEERGAGFTILRNGIGSSNSSLNFMNSIEPFSPGSPTSKPNYTDWHYNS  
GQFPLSQARARGLPYIYADAWSAPGYMKTNDENWGGFLCGIEGETCPSGDWRQAY  
ANYLVQYIKFYAESGVPVTHLGLNPEQEVVSYASMGSNGTQAAEFVKILGQTLEREGE  
DIELTCCDGVGWNEQEAMIPGLQVVGSDGKSAEDYLSVVTGHGYSSPPTPLSTKRRTW  
LTEWTDLSSGFTPYTFFADGGVGEGMTWANHIQTAFVDANVSAFIYWIGAENSTTNSG  
MINLINDEVIPSKRFWSMASFSKFVRPDAQRVKATSSEASVTVSAFENTNGVIAIQVINNG  
TSATSLTVDLGQTQKKVVRVVPWVTSNDYDLEKLAKIDVKQNSFLTSVPARSLTSFVTE  
CD

>788\_t gene=788\_g

MRHTKTLTAASLALLTCAAAQSADPGLGVNSNAQGATEQVTPGGGPNSEDWLNTGID  
GDGWNPPFIMALGDIIHVLDLNTFYSGFGSPCQQYDQYFQSAGSQYNVDPVILAIAMQESS  
CNADAGGPTPGLMQVSCDNYPNGVCTDSIQDNVNAGTNYLVSQISAFNGNAIEAFGSYN  
GWFTAGSGLNNNQGLTTSYPCSSEGGQSNQNGEPQNLDYLQQIFNGWMMGLDVYGDSDWI  
GEYQCAGQCNGNNLC

>799\_t gene=799\_g

MRWSSILSSALLVAGASAFPHHHTKPTSPSPSASSSVPVSTPSTVPIKAAAAATDPSYWL  
ADITHQGNAPFAGSGYTVFRNVKDYGAAGDGVTDATAAIQSAISDGGRTAPSSNTTTTK  
TPAIVYFPAGTYVISSPIIDYFTQLVGNPNPAILKATSSFTGIGLIDGDQYQSNQKEGWIS  
TNVFLRQIRNLVIDMTNIPGTTAATGIHWPTSQATSLQNVVNLNADQGTQHTGIFIEDG  
SAGFIGDVVVNGGLQGLNIGNQQFTMRNVTVNNAVITGITQLWDWGWTYVGLTLNNCQ  
IGISFSSKADTQLVGGVNIIDSTISNVETVNTSWTPTASPASAGNLILENVLDSVPTAVA  
GPGTVFLEGGSTTIASYGQHEYTPTGPSTLSGTYAAGSRPTGLLASGTSNYYTKAKPQY  
EAYTTDQVVSIRSAGAAGDGTDDTAAINSALTSAAASGSLVFFDYGVYLVSDTIYFPPG  
SKVVGESYPIIAGSGAKFSDASNYPYIVQVGKSGDTGTIEWSDMRVGTIGGTAGAILIEW  
NLGELGSGAWDVHSQIGGWQGSDDLQSQPTTAAVSTACEAAFLNVHITSASNVYF  
ENNWFWTADHDIEDPTNTQISVYTGKRVLVEGSNIEMWGTGAEHHGLYQFQFSGASNV  
VGGYFQETEPYYQPKPDATSGPYQSITSPWSDPDFSTCLSGNCDALGLHITDSTDITMY  
GLGLYSFFNDYSTTCS DAGNGENCQSEIFRVDGSVSGLVVYGYQTVGTTNMITINGTSTA  
LYSDNLSVYPPDSIALFSY

>806\_t gene=806\_g

MADMSSILLNGTILALNGQGTVVPLRHHSLLIEGNRIFKIGKDLTAPSPATKMIDCTDKI  
VSPGFIDTHHHLWQSQFKGRHADHTLIEYIPTGSMQAFNCTPTDVFVWGLGGCLEALDA  
GTTMVVDHAHMNYSQHNHTAAVAASKSSGIRSFAYSIASRVKCCVPNLIDPCIAPEWA  
IDQAVQLAETAPFNGRVQVGLAFDAFFLPKDVIVDFVRRRAGTKLITSHYVRGAVL  
GQTSVLETLDKYDLLGSDILISHATCMTDEDAERIIRGGVLSSTPETELQMGLGYVPCFQ  
EDIAEICSLGVDCHSNNSSIPSQMLALQAERGRQNQVLLQQGKAPKHQRTTAQDVFL  
LGTIGGARAVKMAADIGSLEEGKLADIVVFDATSPAMVCAADQDPIAAIVFHSSARDIEM  
VIVDGQIRKTKGQLIPVDLMSSTDILERTSRVVEWSDVVKELRASRERILVQDERHGP  
AIECAIDEVAAAALQVSKENLV

>861\_t gene=861\_g

MVDNWDPAKPLVARQPFLIYTYILGSAASVPAWAILYLIPRLRPVSSWPYKTALNS  
KISYYLLTFFSKIRIATPQIPSGKEADLFLVAKPANDLRKTYAGLLDNPQIQPTTIGGFVW  
PSLKQVATVSSATNENWVVLHFHGGAYVLMTPRDPTVQRGPKQLCEELPADAALCVDY  
RLSSNPKSSHPAQLQDAITAYNYLIRDLQISPSRILVSGDSAGAHLAILLLRHLTTHPEIGLP  
LPRALLLHSPWLDLTPKGTSDVSMPPGGRDYISDAFLQWGATTFPSGSSRDVDFVSPFYH  
PFASPIPIVWQAGGVEKLYSTIAEWVVGKMSNAGSTIELYTMEDMPHDVHFHSSDMDLEA  
QARDAIRAAKGFLERTR

>885\_t gene=885\_g

MANTEGQLRDNAFTLNGNAYEIEEHFKRLAVPHLLTAKNFNPQSWTAHGRSTDAASSRI  
INEGAVKKPPVTSLGPLAAAFSLGTAASKHGDGNSSSIYDFVIVGGGTSGLVVANRLSELN  
NITVAVVEAGDSALNNFNVS NVLGYSTAFGTQVDWAYQTVNQTQYAGGLKQTVRAGKA  
LGGTSTINGMSYTRAEDVQIDNWEAVGNKGWNWETLFQYYKKSEGFQVPTEEQIAQGA



DYNASYHGLNGPLKVGWPTSITNSSFFPVLQQTFEKLGVQYNPDANGGKMGVFTVHPD  
TIDREMNVREDASRAYYPYETRNLKIIISNTRANKIISNATQGEAVAVGVEVNNAYG  
TQRIYANKEVILSAGALRSPALLELSGVGNPVVLSKYGIPVKVNITTVGENLQDQTNGL  
SWEGVETLTGLATFSALPSVNQLYGNNVTALASYVESNLVEYAQAQVSAASNGAVKESN  
LLEAFNLQYDLIFKSQVPYAEVVFSPGKQSLAVEYWPLLPFSGSIHQADPSVLPTINPN  
YFMFNQDAEAQVTVAAQYIRKALGTAPLNSLVRNEASPLNILPANASSSAWDSWIKANY  
RTNYHPVGTNSMLPREKGGVVSPELKVYGTKNVRIVDASILPFQLCGHLTSTLYAVAER  
ASDIIKESHQI

>932\_t gene=932\_g

MAHLTTASDPAPLPLPPGITSRQIDFRAYGHLSYHVLEAGSPTDPLIILLHGFPDLAFSWR  
KVILPLANADGGGRGRRAYHVIAPDQRGFGRRTGWDSRPYEQVDLHNFATTLVVRDVI  
ALVNALGYSKVECVVGHADAGAVTAAACAVIRPDVFKSVALLTHPFNGVPRLPFNTIDTQ  
GSSSFPAKAEIAKPSINDKLVHNRKHYKWYYSTHDAIGDMAGPTTAGGLRGFLRGYF  
HVKSGSWKGNPNPYPLVKKGESSRQLEWPIDEVVKMPEYYIMPLDATMPQAIKLMKEE  
SQDASKDWLPDEDLAVYVNEYARTTFQGGNLYRVQTDGDKKPELKHDLDFAGKR  
ISIPCAFIGGDKDWGTYQPGAIEKMTGEGKEVCDDFRMLRMVQGAGHWIPQEKPDVEV  
VRAILEFIDF

>936\_t gene=936\_g

MSRQPGSSYPRGDVSPHSDVQSTSSQISPVSDLPASRSFRNHPSGRQEVRLNRAAPSQPG  
NINTDVPPEPPQHRIMGSPDMDTNNRPQIDRSTSLRTNTTATPGADNMSAAAAGGGISG  
IAYDVASRNQRESGLEAVRTIRGQGGYGYDGPDRNYSDVPYEATNNRHSQVDPSG  
VHYSAGLPLGGTALAAGTPPQVGTPLSASNSSHLSVGELYPRYPSGGLYDGPYHSYNS  
HDPTVINPNDIADDGDDIMNAPPEQRRSFWGKKSNOGLAAGAAGGAAAGGVFSAV  
NSLRGGPTTYESVPTGAGGVGQTSYEKDAFLTRQADIAAAKKRKRWLLTILVGLAIVAH  
VGAIVGGILGSQKHSSAASDSNKGSGSSSDPGTNTNTAAGDLATNGDLNKDSPEIVKLM  
NNTDLHRVFHGM DYTSWGVQYPLCLKYPPSQNNVTRDMAVLSQLTDTVRVYGTDCNQ  
TQMVLHAIDNLGLTDMKLMWGVVWNSNETTTERQIETLYDVIDSMNDTSHIEGVIVGNE  
VLYSGGFSQTTAQTALITYMENVRSNLTAKGLKVPVATSDLGDNWTADLLAASDIVM  
ANVHPFFGGVPVDQAASWTVDFFNTHDVSLTSGTNKDAIIEVWPSAGGNDCGSVNC  
TDSTSGSVAGIDEMNQFLSDWVCQALSNGTKYFWFEAFDEPWKVIYDTPGKEWEDKW  
GLMDSARVLKSGLKIPDCGGKTV

>948\_t gene=948\_g

MPSEEQLOGEESRLLLVSRLPITIKRSDDGKYDFSMSSGGLVSGLSGLTKSTTFRWYGW  
PGLEVPEEEIPVVQKRLKDEYGAIPVMIDDELADRHYNGFSNSILWPLFHYHPGEITFDEY  
AWDAYKKANRLFAQAVAKDVQDGLVWVHDYHLMMLPEMLREEIGDTKKNVKIGFF  
LHTPFPSSEIYRILPVRNELLGVLHCDLIGFHTYDYTRHFLSSCSRLNLQTTPNGIEFQG  
KIVATGAFPIGIDPKFKEGLLKEKVQKRIEMLEQKFQGVKLMVGVDRLDYIKGVPQKL  
HALEVFLSDHPEWVGKVVLVQAVPSRQDVEEYQNLRAVVNELVGRINGKFGTVEFMP  
IHFLHKS VNFDELIALYAVSDACIVSSTRDGMNLVAYEYIATQHKRHGVLVLEFAGAA  
QSLNGSIIVNPWNTEELAGAYQEAVTMSEEQKALNFSKLEKYVSKYTSAFWGQSFVSEL  
KRISAQSKQKVSVRKASLLVPGVSTPVMNGDSEQTAPDEVVVVSSEGEAEEEGKS

>973\_t gene=973\_g

MPRVFPLGRLAWTEYLALFASLSLVFCEGFLRLVTLCLPDPIIRFFYQSKALFNALASTQ  
TRGLRAKTKSVAESIAQTVDFADLCSIYGYETEEHIVQTKDGYLLGLHRLPYRRGEEADY

VNVGENGTRKKVVYLHHGLLMNSEVWVCLTDEQRCLPFQLVERGYDVWLGNNRGNK  
YSKKSTRNSPASTDFWNFSIDEFAFHDIPDSIEHILEVTKQPSLSYIGFSQGTAAQAFVSV  
HPTLNQKVDVVALAPAMSPAGLYNGIVDALMKASPQVVFLAFGRRSILSSTAMWQAIL  
YPIIFVRIIDIALRMLFNWTGENISQHQKLAAYPHLYSFTSTKSVVHWFQIIRNQAFQMYD  
DEVGGPLAVGSNSRYYPVRYPTRNIRSPIVLIYGGSDSLVDIGVMLHELPRRTTVREIPK  
YEHLDFLWALDVKLVFRHVYDALERYACGQSTVEVPLQITGPETDSNGNQLSLSTPKG  
EAEPNVPLRRHLRRTDSLNSLSGRFSPNNLTYGDQDWRIDPSKAPEDVDLDTLT

>1033\_t gene=1033\_g

MISAGPAPDLKRFLQAGPPVYVFGFGSIVVGDPERLFDMIVSTVQAGIRAIVSKGWSNLN  
GPPNEHIYFIDDCPYEWLFKHVAAVIHHVAGAGTTDCGLLNGRPTVIVPFFGEMVFCACD  
GPEVPHASLTVESLTAAVKFCHAPGAEAAAQNIIVIMKGESGVIAAVESFHRNLPVER  
MRCHAMPNQAAVWTFKRKREIKLSKPAVQTLIDNNINPKDLRECEVTKIVIVNRRW  
DPLTGILSATTKTGSAMLKSTGDGRPAPPSVLSLGGQSDHKGKSPVVAGNMAGATLKG  
FGNSPAYLSMG

>1049\_t gene=1049\_g

MPRAELLQRIRERLRTSLGHPPSASLFWGQRRTRFLIAAVVLSFIFFSHTDGDYRIQAS  
FRSETRIAKSVRLQRRAEVKEAFIHAWEQYKKAWLHDELLPISGGHKDPFVWGAATL  
VDNLDLWIMGLKDEFEDALGAIEQIDFSRPAERVPVFEVIIRYLGGLLGAWDISGHKY  
PILLRKAQQLGEFLYGAFNTESGIPTPYWENAGTKIEGENGVIVAQIGSLSLEFIRLSQ  
VTGEPKYADAIQRITNQLAQTQNSNALPGLWPSFANCMGESLSFSNRDFTLDSLYEYLPK  
THLMLPSSSPAQQYLEMYRIALDSFSKHLVFRPSLPGDPDVLLSGNANANDGFANLDT  
AIQHLGCFVGGMVGLGAKINKSPTLETAIKLTNGCVWAYENTPSGIMPEIFHVNQCADP  
TSCTWNGQGDGFRVDDSSYQLRPEAIESVVMYRLTGDLVSWQEKGWRMFESVEKHSR  
TSIAHARLENVMDPHPSKTDSMESFWLAETLKYFYLLFSEPDVSLDQYVLNTEAHPFR  
GG

>1052\_t gene=1052\_g

MAKQNKYSVILPTYNERKNLPIICWLIKTFREQNLDWEVIIVDDGSPDGTQEVAKQLQK  
VWGTDHILKPRAGKGLGTAYVHGLQFATGNFVIIMDADFSSHHPKYIPKMIQKESNA  
DIVTGTRYAKRGDLKGGVYVWDLIRKFTSRGANLIADVMLMPGVSDLTGSFRLYKKS  
LEKVVITSTESKGYSFQMEMMVRKALGYKVEECPITFVDRLYGDSKLGDEIVGYLKG  
FMLWLKV

>1092\_t gene=1092\_g

MGLDITVRNGLIVTESGVLPSGQEIGISNGKISLIGYDLPEGPETNIIDAQAYITPGGVDS  
HVHLAQRNAPTGDWTWETGTRSAVAGGTTTFLAFASQTKEMASLFPALDEYHGKARGQS  
YCDYGFHFILTNPSTILEQELPRIAKDEGITSVKLYMTYELYKLSRQLLDTMLACRSLG  
LTTMIHAENSDMINFLIQGLERNENTAPFFHAISAPKIAEDEASYRAIRLAELVDAPVLLV  
HVSSDGAMKHIREAQTRLLPIHAETCPHYLFLLSDKLANHEHDAFHGAKGVCSPPLRHN  
PEDLEALWRGISNDTFTIFSSDHAPSKYDHPQGGKAGIIDGIPKFSSIPKGIPGIETRLSLLFS  
ESEGCLPKERARLSLARFVQLTSGNPARLYGLTQKGSIMPGFDADLVIWHPHSQGEKIIT  
QEKLHHGVYDTPFEGMHVRNWPRLTMLRGEIVWDADKDRVTGVKGFNGFLKRENGR  
VLVGKLGQLPAGMIEGERDLWRLKSVT

>1102\_t gene=1102\_g

MVDGYPNNAVAVIGMACKFPGADSLDEYWQLLDEGKSMCEPAPEGRFATTENRRHQE  
KSIYNGNWVSDIDAFDHFRRKSSREAASMDPQQRLLQVAYQALESSGYFGPVEPRTD

VGCYVGVCASDYNDNVA AHPPNAFSTLGLTRAFLT GKISHYFGWTGPSVSVDTACSSS  
MVAIDAACNAVQLDNCYSAIAGGVSLFTSPYFFQNL SGASFLSPTGPTKSFADADADGYC  
RREGIGLVVLKKSALADNDNILGVILSNAVAQSSNLVPITVPYSPSQTSLYRRVLKQA  
NVSPEEVTYLEAHGTGTRIGDPQEYDGIREFVGCQGQREQPFHFASVKG NIGHTEGASGV  
AGLIKTLMMERRVIPRQGSFKQLNPKIKLEPNLMIPTSSVPWTAKTLIACINNYGAGGSI  
AAVIVKEAPKLSTQKSSPLALQARYPIFLSAHSPQSLSELASRLR TYINHLPSSSTRNTLA  
DLAFNLGDRQNRSLSNIVATTVSSMSELDDQLRILSSVPDSAPAQIAVTNPKPIVLA FGGQ  
TNRSVGLNPAVTEASGLFRSYLDECDRILKSLGNSIYPGIFESNPRDDIVGLQTMQFAVQ  
YASAKTWMDSGLRVDYIVGHSFGQLVGMTVAGILSLEDGLKL VHGRAALMQQGWGPE  
RGEMVALDADLKTQELIATSPPNDKLEIACFNGPKSHVVVGSNVAIDGLIDKLRVSSAV  
KYKKLVNTHGFHSRFTDAILPAETLAGTLTYCSPQIPFESCSDGSSWSAPTPQLIAQHTRI  
PVYLGQAISRIVSRLGSCIWLEAGSNSSITSMARRAVGDDVQSHSFIPLNLSSPGAIGSLAD  
ATVQLWRNGHHRIQFWPFHRVERGYTQLSLPPPFKTRHWLEWVEDKPVAAAPAIT  
QGADKDNHNNQLFSPTWLDANRKTARIRVNPRTDEWHRVVEGHAVLNNPLCPAPLYI  
ELVARAIKILGLGEVSAFQSLEIIAPLGLSQDVDLALQLDQQTNNNWSFSFVSQQPNAPQ  
QDPAVHATGAVTIASDNNSVKA EFDRTARLLPYSRVKELLSQEDGEAMHGALVYKVFN  
RVVQYDDYYKGVSHVVAKSGQVAANVVLRNPPLSWATEQVCNPLALDNFLQVSGLVH  
NSLRDCADTDVYVCTKIDRLSISPSFSTSSSQPGHGRWGVFNLNVINDKQVENDVYVFD  
ATTGELVLMVGAQFSRVLITSLSRVLSRANNSSTSTIAAAATTTTTTAPALPIPVTA PAFS  
ETPFASTQSPTTSSATTKAKVVRKKKTPGIERELRQLLSRITDVPEEEFSGQATLEDL GID  
SLMITEIVSEINTAFSISIPQEDLQDLVTFESLSTYLARRGAGGNSVDEEEIIVEKDDL PNPV  
VLPKIAPAIPDTRADSKRDESLRLQLAQLVASHLEVPANNFVRTTNLADQGLDSL LCM  
ELASDIERSFGVRIDVTLTTESNFGDLVDMVFGKNGSEKPLISSISSISGTESLGPSTPG  
GTDTDYEQISLPDSCNSIQAFEKIQFDYDQYANELGFIGFWKNVYPTQARLVLAYV VET  
FRDLGCPDALQPGQTIPLLPVLPKHDRLRGVFYEVL RDGQIADYTGKDIRSEKPLDSE  
TSAEYSEIIRAHQHAKEHELLHLCGSIMAKLVSGERDPLQLLFGTKKNKELLEEVYSNG  
PMYRAMSQLLAKFLKQALSNR SAPVRILELGAGTGSTTKWVVDTLVRSGIPFHYTFTDIS  
TSLVAAGRKFYSKYDDCMEFQVLDIEKDVPQKFLRSFDTILSTNCIHATSNL PNLGHIYQ  
MLRPGGFVSLVEFTKNMFWFDLVFGLLEGWWLFNDGRQHVLADEAFWERC MRNVGF  
QHVAMTEGPSLESNTVRIITGFTNKATEPPRTASWIERKRNETDMETVAFNTTPDG VILR  
ADIYYPSSSSIIIGTSGLSSQKEWPVALLIHGGGHVMLSRKDIRTKQIQHLIRHGILPVSDY  
RLCPEVNIVDGPiHDVREAFVWARTQLSSLKLSASPYLKIDDSRVAVVGVSTGGTLAL TL  
GWTSDVKAPDAILSFYCPTDYEDPCWKAPNFPNKTEAEAQIEDYDLLEGVYDKPITSYN  
VPPSKRATGGWMCPSDPRSRILHMNWRGQMLPVLSNGLPSKEAFRKL SAEQKQITRL  
PQPSPEQIARFSPLAHIVKNEVHSPTYLVHGTEDDLIPWQQSQRTYEALVAAGVDAGISV  
LEGQPHLFDLFSGDGK KWERILEAFDFIFQHLGITSQQ

>1103\_t1 gene=1103\_g

MISFMRFVSILGLIAQLAAAAGSYNISSLVTKLSPGAEVFPSSANWSEVTPRWSTNDAPT  
FYAAIKPATPGDVQKIVRYASRNQIPFLGVGGGHGFTTTLGELKEGLEIDLSQFNKVSVD  
ARNNRLTIGGSVRFEELDPVYAAGKEIQIGSCPCVGMVGGSLGAGVGKYQGVHGLIIDA  
LESVKLVGTGELITVSKHQEPDLFWGLRGAGFNFGVITEATYQVYDLTNNGSVLNADF  
EFAGNLNQTFEFLASFNGKLPKALFGVLANDATNGPTILLNAVYIGPQDEGLAYLQP  
LLELPYLRNITQLTWNTVFD AHMFGSIAATCIKGNPQNNWSQGLAGIDVPTFVAYYNA  
LADLWTQHAAAANAILSIEVFSPQKVLTPVDGETAYPWRDTAVQIILNFPVND DDTVTNFA

EKWVPEFTETGGFNESRVYVSYAHGDESLETKYGKRKLPRLTALKTKWDPHGLFSFNN  
ALPIH

>1106\_t gene=1106\_g

MRAKTVSVVALTSVFASLTSGSTTGPSQNGPACCHDLKGILPADTFVSNSTEYNAEYHD  
FWSSTEDLTPSCVFLPDTTEKVAQAVQLFTHLKCQWAIRGGGHSPPGAANINGGILLGT  
DHLNTEINHQEGYVRVGAGNRLGAVYNATDPQNLVPIIGRYEDVGLGLAVGAGFSFLC  
NREGLTIDNVLNVEVVIANGTVVNANSTSNPDLFWALKGGNNNFGVVTHFSRLTFPTNG  
TVYGGNIVHPESFDGVAELFYDYFTYQAIEDTLTHVMPSYIYIGSTDVTTAVSLVVYNE  
AVDELPPILQPWIQVPSTSNFSSRTYGS LAQEEGSGIFDGF AVDQRLFSVFPDRAFLKEA  
WDIQLKWLDRDKDVPGLVGVQVPMPTPNQVAQGVAKGGNALGLDKTNEGKSIVVIL  
MLLNFSNLSLPRLRVEHNALMEELVDLAKKRGVYHPYIMLTYSGAGQQAIASYGREN  
VAKLRKIAKAYDPSGVFQHLVPGGQKLPSD

>1112\_t gene=1112\_g

MHRHNSATSIRKKVSDFLADLTDDSDLEEYRDDYKSDWSPRSAITAITPRRLRKYVIAS  
LVFFVILYITFHRSHPPRGLSPYLNDAIDWTQYAYTQYATDETYLCNSVMVFEALDRLG  
SRADRILFYPKDWDLVNSASDRLSLLNLAHDYKQVLEPVTMDSLHQFESEDRATW  
DESINKLWAFRETTYRRLQIDSDTLILQNLDELFFLPSSTVAMPRAYWDSSENKLTSL  
VLEPSYKEYKALMDKVQGVQVEAGQLGTGREALYDMELLNERYGGSALVPHRQYGLV  
TGEFRTKDHQKFLGNDYETWNPDKVLSEAKLVHFSDWPLPKPWILWPLGQLAKMQPV  
CDHNPGTPQESGCRDREVWVKQLYEDFRLKRKDVCKLLSYPAPEWPPRPKMSNLPNQP  
PPQDLPPQAPSVDYKVDTNANIDATAESNSQVETIAKVEVDG

>1122\_t gene=1122\_g

MHKFQRRGSIFQIELNKNVADRCAWQGAPFDNLYAGISVQFNDSAAA VVAIAIRDITYL  
VDFYEHFHDARPEVKLTGREIIDFIISRLREYSEEHLERFTGLGMPEEADRCPQLCSRLW  
HELDIVPIAFAEGVPLFATSPKDQTKWNARCIDELTEAMSRRCVRFFGPSNPNILDVGYQ  
GRVEVDCASRIRISTLDDYKPTVGPPTWEAVNHYASELKKRKKIKIAFFSATPQGGGVAL  
MRHALVRYARELGVDLQWYVPKPRPGVFRITKTNHNLQGVSAPEERFTEDKQETIEEW  
LHDNARRYWLSSGGPLQKPSEGADLVIIDDPQMPSLIPIAKSAAPERPVIFRSHIQIRSDL  
VGTPDTPQHEAWTWMWNRIKHADLFISHPVEAFVPATVPGKVGYPATTDWLDGLN  
KTLRDWDVASYGRIFNTLCHQTQTPLINYPDDEYIVQIARFDPKGPDPVLESYARHELL  
KENGIEKPPKLLICGHGSVDDPDGNLIYDATALQHIEFRPHLKDLCVMRLGPSDQMLN  
ALLSKAKIALQLSTREGFEVKVSEAIHKGKPIASRAGGIPLQVQHEKNGFLVEVGDREA  
VAKYLFDLWTDQDLYDRMSKTALETVSDEVTTVGNALCWLYLASHLTAGKPVKPNR  
WINDLAREAAGIPYQKGENKLRKRAVRVENMG

>1126\_t gene=1126\_g

MKQTISREWILGLALTAVMVPNVSADLT TTTISSTNWGTWEGFGVSLAWWAKAFGTRT  
DLADIFFSTKSTTYNGQSIPGMGLNIARYNAGACSWNTFNGSAMVVSPDIASRQMDSY  
WIDWSSASPSSSSWSVSDANQRNMLSLAQARGANIFELFSNSPPWWMCLNHNPSGSN  
DGSSNNLQSWNYDQHAVYLATIAEYAAKNWGISFQSVEAFNEPASDWWNGETGTQEG  
CHFVSTQATVIGYLRTELNNRGLSSTLVSASDENTYDLAVSTWNSLGGSTATSNVNRIN  
HGYQYTGRRDLYSLASSAGKRLWNSEYGESDATGEQLVTNLLDFRWLHPTAWVY  
WQAIDGSGWGLIDGDNVSLGAVSQYFALSQFTRHIRPGMRILDGGSNYTVAAAYDS  
TAQKLVIVAANWGAAQYLNFDLSEFSTPGVSGALVPRWITQTGSGAQYESYNDTYISGT  
KFWSYFPTGAVQSFEVSHVVL

>1129\_t gene=1129\_g

MSSVQASSDEALETHINDYENPRIFQRNRLPARFYYPETSLCLNGTWDFNYAPSPLHAP  
EPNASLGSDDKSVIESAIEPTSSDDEAQSLSMLDLKSSSAEWTSITVPGHWQLQGHGHPH  
YTNVVFPPACPPHVPSNPPTGTYRRSFQVPPRWEKSSQLRLRFDGVD SAYHVWLNNGVE  
VGYSQGSRNPAEFDVSKIVKRDGINDLFVRVYQWSDGSYIEDQDQWWLSGIFRDVHLV  
AFSSQARIEDVFIKTELDSTYTDATLEVSLSLHAESPSLVRAKLYKPGDSDEVLKSTELKIE  
IGQESAEIFMPVATPQKWTAEPTLYKLEISLFRITDGLPLQTIVQKVGFRKVEIQNGNL  
TVNGQPILLRGVNRHDHHLFGRAVPLSFIREDLLQMKRYNINSLRCSHYPSHPRLLELC  
DELGLWVMDEADLECHGFYDAVARPMDIPESMDYEERKKLAFGKAAEFTTNNPEWRD  
AYVDRMAQLIHRDKNHASVIIWSLGNEAFYQGNHKAMYEYAKKVDPSRPVHYEGDAH  
ALTADMYSYMPSLERLIDFATAEGDNFSKPIVLCYAHAMGNAPGGLVEYMDAFRKY  
RRLQGGFIWEWANHGLWVESKEPGKKGYAYGGDFDDFPNDGDFVMDGLCYSDHSPT  
PGLIELRKAYEPVRAWVENDLIVIKNEYDFVSLDDILAVFKVEVFSEKSAKILSSGTLNLP  
HIPAGQQGTIPIPTGINIPSSGEIWL SVSFLSKTAHSWADSHSEVSWFQHCLRSNKSLSLPIR  
TMTNTTSLEIHTTGTSQTITGQSFSLTFSRVTGNLSTWL VNGHALLES DPLTNAALSAGF  
WRPPTSNDIPFDLPEWRRFGIDTLTNHQLRSFHIARRSDGSIQISTKTFICTPILAWGFRATS  
SYTITVDGTLTVSIIHLVPEGPAPKTLPRIGLDLYLGDSL DNATWFGRGPGESYADKKSSQ  
KMGYIRAGTAQLHTPYEVPQENGRDLTRWLRMADGRGWGLKAIRTDASAGTSSPFQ  
WAASRYSAQAIEQAKHPRDLVAKNAVRLRLDVASAGVGTGACGPRILEEYQVPCERV  
VSFCLQPSFDDFDI

>1138\_t gene=1138\_g

MRLSALLSAAAIWHATTAQLIGPVGPTTDLSEKNIQCNILNYGAKADNSTDISTALENTF  
TECVLKNPGSRLIVPEGDYLLTKSVVLSNATNWALQLDGLITAA YGGNWTVDRELILQG  
FAGVQVLNSTINGEGDNKFLLDVLVIVNAVDFEFYSSNGLGAIQGGYIYRNLNNTDRP  
RLVRLVSPTNASVHDLILVDSPKFHIVLDFAVNVEAYHITVRGANLGSYDGIDAIGTNYW  
IHDNEVTNRDECVSVKSPSHHALVENLVCNQAGSGISIGSLNVSAEISNIEARNISIIQGNNI  
AFIKTYPGGSGYVTNVTFENFRSLGSLYGLDINQYWQNTFTPDTGSVALSNLLFKNFSGS  
VANGALRPLYLIANDLTFKAVTVEDFSITWETGTNVVNHISNVFGKGDNSYGTNDGIP  
SLSAGQAPYTYTSAYTITASPTSWKAPSTPTWAVASTGYGTASPIPVYTPAPLWRPGGVD  
YDLHYWGSF

>1164\_t gene=1164\_g

MTFDVAVLAKLKQNDKIALLSGTDWFHTHPIPEHNIPSIRVTDGPNNGIRGKFFAGIPAA  
CIPCGLTALGATWDKSLLRQAGNLIGQECLA KGAHCWLGPTVNMQRSPLGGRGFESFAE  
DPHLSGKLAAMIVGCEQDGSVISTVKHFVGN DQEHERRAVDCLITPRAFREVLYLRF  
QIVARDAKPGALMTSYNKINGKHVADSLELLEGIVRKEWQWRPLIMSDWYGYTTIDA  
MVAGLDLEMPGVSRYRGKYIDSAVQARLIQSVIDARSNVLNFVKRASQAQVSHVEK  
GRDYPEDRKLNRTLCSNSIVLLKNEENILPLPKTIRKIALIGSHMKHPQICGGGSAALLPY  
YSVSLYDAITEVLPKDAEITYEVGAYAHNMLPVIDRMLSGAVMHFYNDPPTKTDRKLLG  
TESVTSTAFQLMDYNQIPELNRSLFWTSLVGYFTPDVSGTWDFGLSVFGTANLYIDDEL V  
IDNTSKQTRGTAFFGKGTVQETGSKELFKDRKYKLRIEFGSANTTTMETIGMVNFGGGA  
AHLGACLRMDAKRMIENAVQTAATS DYTICTGLSGEWESEGFDRPHMDLPPGVDEMIK  
RVIVATQGRAIIVNQSGLTPTMPWANEASCIVQAWYGGNETGHGIADVLFQDVNPCA KL  
PLSWPVHVSHNPAYLSFASVGGRLVYSEDVYVGYK FYEATGREVLFPFGHGLSYTTFEL  
TSQPIKITPETFDPEHPSVVELCLKNTGQRAGA QILQLYISAPNSPTPRPIKELHGFEKVFLE

PGQQKTVSITVDRYATSFWDEIESMWKSEEGDYEVLVGTSSVDILGKAVLTPETRYWL  
GL

>1213\_t gene=1213\_g

MSSHTKLSGFTVFQKHXYKTVGTHKIRADVIIPTSQLTGKRPVIIRFHGGGFITGDSLIMEW  
FPQWLLDLAKASNAIILSANYRLLPEATGLDIINDVEDLWKWLSTSLPDILERQLDPPIMA  
DFDRILVSGESAGGLLSIILALKYPPKIRAAIACYPIIDMAAFGRGIDKPILGNTFSRDAIDR  
LVAEATTESIISTDFNQTRLLAMLSCAQHGALDSLYSRGIWQAEQRIQLYPLEKLNQDV  
EYPSGGITIIHGTKDSVVSPPKGSQDFLEIVQKMTEIRNNGPAVSLSLQDGEHYFDTDVRL  
ESWLQRSLARCREHWLQ

>1227\_t gene=1227\_g

MALSRSLRRTSPITLVLAAILAIGFIFLFDPTLSSAPITARQRQEDAASHPLSPPTKPFKPN  
HAQGRNGQRAPPPVVHYKMNELTTSASAAGGERVLILTPMMNFYQQYWDNLVKLQY  
PHELISLGFILPKTNDGNAATLALQEA VAKTQSGPIDDRFASVTILRQDFEPPLQSQDEKE  
RHKMENQKKRREAMSRARNSLLFTTLGPSTSWVLWLDSDIETPPTLIEDLTSHNKPVIVP  
NCYQRYFNSEK GEMDVRA YDYNWIDSDMALQLAAEMGPDDVLFEGYAEIPTYSRLM  
VVMASQNPEDADPHSEVELDGVGGTALMVKADVHRDGMFPFPFHYHMLETEGFAK  
MAKRLGYTCWGLPDYF

>1236\_t gene=1236\_g

MSSVEIFQGA VIFSKDSENLEILDNATHIVKDGRIDTFYKVPQIPANAIPADAKISRLPWG  
EFLIPGFVDTHNHAPQWTMRGLGQSLHILDWLSEITFPVEARFNDPDYASQIYGQTVDDF  
LRQGITTASYSSRHADATKILANLCHEKGQRAVFGKCNMDRHAPAYIQEKSASLSLQE  
TEECIQHIRSLPGCSSPDVALINPVVTPRFAISCTSELLQGLGDIVKRDSTLAIQTHFNEAQ  
QEIDATTELPQFGGSEADLYESFGLLSRRSILAHCTIMTDYEKDRVHTLECGIAHCPIAN  
MTVGGGFMAAPVRDFLRGKIKVGLGTDSSGGWASGMLSVIRQAMIASNAREVMSEGK  
DKALNINEVFYLATLGGAKVLCCLADKIGSFVKGKFDVWVRTTTGLESAMTPREADD  
TLRTVFEKYIMTGDDRNVANVYVRGRRVAGTDDP

>1259\_t gene=1259\_g

MRLNGCLKFRRYGPARRLFRVTLILIIWVFAEIVSVHQSLTTGNPQTQFNDIHAGRIFIAS  
LHWNNEAILRADWNDVAVQLVSHLGAENVFVSVEYSGSWDDSKGALRDLARLDALG  
APRNLTSDVTHEDEINAQPAEEGWIETSRGRKELRRIPYLARLRNWSLSILEDLAREGVT  
FDTILFLNDVFTTQDVLTLHTNGGSYAAACSLDFSKPPRYDFTALRDSHGNEPLMQ  
TWPYFRSSESLNALLSMSPPVPTSCWNGMVAMPPTPFLSQSNPLRFRGIPDSLALHHLEG  
SECCLIHADNPLSATHGVFLNPRVRVGYNRAAVPTLGEVVASLDFNAGVLEEEYSAEN

>1267\_t gene=1267\_g

MKGTLASLAVVPLVAAIPQNLHIRDGMTPTVTKGNAFFQGDTRFYVRGVQYQPGSSK  
LVDPLADAATCKRDIKFTDLGLNTRVYVSDNSVDHDECMNALADAGIYVVLVDVNT  
KYSINRADPEVSYNDVYLQNVFATVEMFAKYDNTLAFFSGNEVINDGPSSKAAPYVKA  
VTRDIRQFIRSRNLRQVPVGYSAADIDTNRLQMAQFMNCGTDDERSDFFAFNDYSWCDP  
SSYQISGWDQKVKNFYGLPLFLSEYGCNTNKRQFQEVSSLYSTQMTAVYSGGLVYE  
YSEEGSNYGLVEINGNDVTEKDDYTELKNALKQTPNPGGDGNYNSTGGANGCPASDPP  
NWDVSN DALPAIPSPAKKYMTAGAGKPGFSGSGSQDQGTKSTGSATSGSGTAADSDS  
VSTSKGAAANLRAPEITFTPIICSAVVALFTLFGASLVIL

>1004\_t gene=1004\_g

MFDREWYRHVLRGLGRIFSQPESTNTPMIVCEECHHQSPQTTNEAVLASMLTNAYLL

AIFNDLEKQYWTIRSRGVNVVVTLLMLGSLVGLVGATVWTTLLVLPYLLGLWNLWCCF  
WVTLERIVNSFDESEGFIVHQAEGEETETNEYMGESKDHFD

>1316\_t gene=1316\_g

MASSLDKNDNFNLQLGDFQLESGEILPQAFLAYKTFGDIKNPAIIHPTSYTAFIHETASVIS  
DTRQSLNPSKYFIIVPALFGNGQSTSPSNSPHLREAFPVVTFADNVRAQYLLVTEKLGLTK  
AKAVVGFSGMGAQAYQWAVQYPDFMDVVVPICASAKNALHNNVFLEGVKSALIAARG  
GLSLGVGLGQRYSPNEPWTPQQREVGLKAFGRVYAGWGFSAWYRHKLFKFFGAKD  
EEEFLQTFWEPWGLKNDPDDLMLVLRWTWQLGDISRAPEFGGDLTKALQSIKCRVVVAP  
VETDMYFPPEDSQFEVENMVAGRGTAVVPSVWGHWGGGCTDSKDDLQFLDEAMVQ  
VFRETG

>1363\_t gene=1363\_g

MRLSDVLAASLGLIAAAGVSKPRSEETCVDAEFTGEVVQYSLSIIEYPIIVDVELQDDT  
TVTIDNTITIAVTNAPTHLHTTVYAATTSTITKTISTATITTSATAVVEATDGSNFQAAPT  
STITTKVTPKADTSTFGSGALPVSQSVSTRSLAPVAGGSAVGSVNTGLYTASTSNTAV  
HTLTATFTNAHYTSTKTYTTTASATATLAAGTWDWKKYKANGVNLGGWLELEEVF  
DQYWWNQYAPNATDEWTFCETLGSRCPILEQHYATYITDDIDKVAAVGVNTRLRIPTT  
YAAWIKVPGSALYHGNQKEYLKTITTYAIQKYNMRVIVGLHSLPGGVNSLDIGEKAGND  
GWFFNTNLDYSYEAVEEVLDFVETGHPWAFTIAPINEASDNPSAFASPETLTTNGSNW  
IVEYTEGVLSRIAQVDKRIPLMLQDCFLGEEHWSPLFANDTNLVIDTHVYYFAASGVYSQ  
WANGAICGQASVLGGDGKFPVYVGEWALQTLYSNTFANRKSLENTQRYAWSYVVQGG  
SFWNIKHNSAVVDGEGTQKDYWSYELLIDAGVITRPIGNATYC

>1406\_t gene=1406\_g

MTTFTKINDSIPTISVNAEAQLSKINPNYAGFTEHMGRCIYGGIYDPGNLSDENGFRK  
DVLEALKELNIPTVRYPPGGNFVATYHWLDGVPKEQRPARELAWLGTETNHFGTDEF  
LKWCEVIGTEPYFCLNFGTGLDEAMAWVEYCNGTGNTHYANLRRKNGREEPYNVRY  
WALGNEVYGPWQVEQTTKEAYAHKAFQWAKALKLLDPNLILCGETGTTSWDYYTL  
KQCLKPTKVTLTSNPTPLIDMHSIHMYTASKDHLQNATAPLAAERAIEIASSLIDLARIEN  
GVGPDEPRPTLCFDEWNVWDPMRAEGRFGAEETYTLSDALAVGVFLNVFVRKSRDLG  
MACIAQSVNVISPLMTSPTGITKQTTWWPLLLFSKYMRGWTIAAHVACGSYNGDTSPA  
WLRSVKDTPWLDVSAVLGDDGFVNLVTINVHEQKDFEVKVEGVKGPVEIFTVTGANVT  
VTNMNGKEEVGVKQTNWDGQGHYVFPKHSLTLMRWKA

>1411\_t gene=1411\_g

MAQPETFSGPHELQKIHVWKAEDSPKDTDLLWVIYIHGGAWRDNTVLAGSFLTTYSL  
TQNPFIKTKVAGFASIDYRLSPHPNAPQDPSSTPSTQLRAAKHPEHIHDVQAALTFLHDK  
YAIDDRYILVGHSCGATLSFQVVMNKVQGADTTTFFPKPRAVVGVCGIYDLVLLRDDRFRH  
IKIYEDFIKGAFGVDERLWEGVSPAKANGVDGIAAGWENGVVAVLASSTGDSLINQPQT  
DAMLQVVVKQWQGLEQGRNVIEMYDLKEEHDDVWAEGEELARVIITTVQTLTEKSAV

>1421\_t gene=1421\_g

MAPSESKKRLALAIVDFLGSSLKDGTLTAEDADSIEIAQNCIAETFGVDPTDSAAVQDAL  
GGQSLFSIYNVYEKLGKKTAGGAASAAAGEAKPAAQPTSNA TPESDKLKSEGNAAMGR  
KEYDAIDLYTKALALAPSNPIYLSNRAAAYSASGQHTKAAADAELAVNVDPKYARAW  
SRLGLARYELGDAKGAVEAYENGIEAEGNGGSDAMKRGLETSRKKVEEMKRADSAPPA  
EEVDSAPGASRGGPGMPDLSSLASMLGGGAGGAGGAGGMPDLGSLMSNPMFASVAQ  
NLMSNPDMLNMLMSNPRLRQMAESFGSGGGGMPDMSSIMSDPSLAEMARNMMGGGA

GRGAGGQ

>1457\_t gene=1457\_g

MAITSRSHDDYTVGWICALPLRMVVAKAMLDEVHDDLPSVSSSDHNTYVLGNIKEHNIVI  
ACLPSGDNGLVSANTVAMHLLSSFPSIRFGLLVGIGGGVPSSFTDIRLGDVVVSKPTDIYG  
GVVQYDYGKALSAGFRRTGMLNRPQALLTALSKLQTYHLTDGSRMLDFIAEAEQKIPR  
YASKFARPPQEYRLYFSDYQHIESGSTSCKACDPTQVVPRPSRDHNEPVVHYGLIASANK  
IVKDSKLRDQLSRDLGVYCVDMESAGLLNHFPCIVVRGICDYADSHRNNDWQGYASIV  
AAAFAKELLFYTTVRYSNQVQNFGRGSPSNAPDFHVPFDLPGALAVEDFIGRRDELERLW  
QHLQPEIKGYRKVAILHGLGGIGKTQLAIRFAREHKEHFTSILWLSGNNQETLLRSLAL  
SRIPGQSSKSAKNDQEQNAKQVLRWLSSAGNSRWLVLDNIDQYSPGINDGYDIGN  
FLPTADHGSILITSRLQSITELGRSFPLGGLDFEDAIALWQSRHLPIDTSTKQDPVLTSAN  
VVNLLNRLGGLPLAITIAGSFMRETGTDISEYLEYYQTSWHDLQSDARPGRHYQQGNILQ  
TWSVSYDAVRKRSDMAELLLL AHFDNRDIWYELLRSKGKSPNQPTWFSVDVLSDLTF  
KKRIAILIEFSLNNEQTGSYMMHPVVQDWCLDVSKIEDKERNRRWEILALIGVGHKTP  
DIDQPAYWELQRLLVQADYVCRSWMSDHMVRDVEIPFALHGIGGLYLNQGWKEAE  
LIYREAVRHRFQVLGEGHTSTLSVFNDLGVLYRHQGLNDASFMLHKALDGFHKCLGR  
DHLSSLDTVNNLGVLYRELGDLNRAEALHQEAITGYEKILGQNHLSLTDTVNNLGVVYR  
DQGRFDEADAMHRRALAGFEMALGADHTTTLNVI GEIGTLYKNQGNITNARVMYWRA  
LAGYEAILGLNDYRTRKVAEILKEIDQEASVSDCSV

>1479\_t gene=1479\_g

MAFYQQLSTGWTFDRDSEQSDLDWMSVPTIPSTVQQDLIANNKLENPYIGFNELKA  
RWNNEKSWVYRHEFQRPEIPTGAKVALVFDGLDTFASVTLDGQTILESDNMFLGHRVD  
VTEALLKSTEGKKHVIEIRFDCAQSRAREIREKYPEHKWVGFNGDMARLAVRKAQYHW  
GWDWGPIMTAGIWRDVRLEVYAARVADLWPKTTSIDFDGKTASVTAIAKIDASNSTSK  
DLKASFRLSLRGQEIARQEDISVETDQTAKVKFEISNPELWWPHGYGSQILYEVTVLSL  
HNGTELHNTTKKFGIRSAETVQQPKHGKSFRRINGVDVFCGGSCWIPADSLPSIDAE  
RYRKWIELMVAGGQVMIRVWGGGIYEDEKFYEACDELGVLVWQDFMFGCGNYPAWP  
EMLESIRQEA VYNVQRLRHHP SIVYVGN NEDYQVQEAKLTYDYDDKNPNNWLKTD  
F PARYIYEKVLPEVVAEYSPATFYHPGSPWGDGKTTSDPTV GDMHQWNVWHGTQEKYQI  
FASLGGRFNSEFGMEAFPHLSTIDYFVENDADKFPQSHVLD FHNKADGHERRLATYLV  
E NLRTATDLETIYILTQVVQAETMMFGYRGWRKQWGDSRHCGGALLWQLNDCWPTIS  
WAIVDYFLRPKPAYYTVKRALRQLTVGVQREHHDWSVTHAQPPTKSRYELWVASSYK  
HEVQNATVELRFLSVVSGKDLRSPVYENV TISPNGTTDVL TSGVIDHVAEPEPHVLSAR  
LWVNGQVVARVDWVQPFKYLDLSDRGLEVRPETTL SAAGERQQILRVSARKPVKCLV  
FEERDGV RVSDSAMDIVPGDEQVVTITGLAEGNAPLKYRYLGQ

>1481\_t gene=1481\_g

MKSSILAI PFLSHLAASQTANWGQCGGNWSGDVTCNPGWYCSYQNQWYSQCLPSSSS  
SSSSTATTLSTVASSATTTTSTTSAGGSTATGSFPSASGTSFVIDGKQGYFAGTNSYWL  
PFLTNDADVDLVMGHLQQSGLKILRVWGFNDVNTVPSSGT VYFQLLANGQQTINTGADGL  
QRLDYVVKSAEAHDIKLIINFVNNWNDYGGMNAYVQNYGGNQTEWYTNSAAQTAYK  
TYIKAVISRYTGSSAIFAWELANEP RCNGCSTDVIYNWAESTSQYIKSLEPGRMVCIGDE  
G MGLSVSDSGSYPFYSEGNDFEKTLTIPTIDFGTIHLYPSQWGEADSWGSSWITAHGQAC  
KNAGKPCLEEYGSLSLCSSEASWQT TAIGSVAADLFWQWGD TLSSGQSPNDGYTIYYG  
SSNYTCLVENHVNAI



>1493\_t gene=1493\_g

MMRASLFLSLSLLVLLQPESAVASPSVNVVALRASFGAGPYLVELLETA AQENATAYFP  
LLDRIASGIFEDAANDKDLYESFLQVLIQDNHLASKESLDSFKFALAIRS AAPRIQAHYQY  
YNTSVTSTLGT AQDAACPVWVHMDGKQYCSSTLERAQQDVSGSDPRELPFDRTLGD A  
SATPAVLYADIASPIFADYHRTLKGLADEGQIAYRVRYP AHDGVSQPLFVSGYGV ETLT  
KRTDYIVIDDRQA EERETTKSNTKVPSAQDLETEEDET PPDLPKPLSSSEVAKLGMSAASF  
VLDSSDPFTTLVKLSQDFPKHSSSVAAYNASKEFLEEYKKNRQAGLPAGRNALWINGLQ  
IDSRQVDAYSLLDYLRRERQLIAEFHQIGLSASEAIDLLSYPALAEVQGSSEAQR YDWRD  
EIEGGGVVVWLN DLEKDKRYATFSTTLQTLQPTYPGQFP AVARDIQNVVVPVDLANV  
DDVQFVVKYLYAFIKRLIPVRFGLVLTANTEDSKAQAKIAHYLHQSYGLASLLQYFEASL  
SSEISR AHKPSFAAAIAERSLRPDQEALSFEVLESEALDLIVARTEKYLKRLDLKGTSPPT  
LVNGVPMRSE TYMQELPMQLSRDLQIIQQGLIQGVVSEDDHVPDYFLSQA AQRNEWI  
VPERDSGILIADIRSA AEAHNDFADILRFPADAKHPTANVQLIVTGDFNTDHGFALLISAL  
KFRQTHPEVEIIP LHPDAENKVGDNSSKLYDLLRHPEPVLDLHVLAQIQSGNSPQAIQK  
EEEQTYWINVQQLIKDIGLSAGATSLIVNGRVVGPLSSVEFTEADFELLFSYETSQRLGP  
LSAALKDLDIETKVEGPLNFAKLTSLVMLSDDPPEGVFEQR SKYRVNVWKRWNSTHSAI  
DASTNTKDASINIAAAVDPTSEMSQKWLPIKTL SKLAGVSVRIYLAPNSQLSELPIKRFY  
RHVLESEPKFDES RALERPEASFTGLPQDALLTLGMDVPSSWL VAPKYSIHDLDNIKLSAI  
KDGSDVD AIYELEHILIEGHSSDTTLRSPPRGVQLLLETEKGSFFADTLIMANLGYFQFKA  
QPGFWKIELKEGRSQDIFQLDTIGGGQQSTGTNEVALLSFQGKTLFPRLSRKPGQE QEEV  
LETGPKPGSAMDYVSKGLNFAQGVLSVGVKNTGKSESEKHA EINFVSASGHLYERM  
LNIMMV SVMKNTNHSVKFWFIEQFLSPSFKSLLPHLAE EYGFTYEMVTYKWP HWLRGQ  
REKQREIWGYKILFLDVLFP LSLDKVIFVDADQIVRTDMYDLVTL DLEGAPYGFTPMCD S  
REEMEGFRFWKQGYWKS YLRDLKYHISALYVVDLQRFRELAAGDRLRGQYHTLSADPE  
SLANLDQDLPNNMQTVIPIKSLPQDWLWCETWCSDEALKTAKTIDL CNNPLTKPKLDR  
ARRQVPEWTEYDDEIAALARRVASTSTDDKHEDEDDVEAEDAYERKDEL

>1503\_t gene=1503\_g

MTTVVASSRAV VSGRLTPATIVICQSTGKITQVHDSIRPASDFPDCESYKDYSPLVLLPGL  
VDAHVHLNEPGRTEWEGFYTG TQAAAFGGVTTVVDMPLNAIPPTTTVAGFKEKIRAAQ  
NKCWVDVGFYGGVIPGNAD ELPVEMGVRGFKGFLIDSGVQEFPAVSAPDIELAMKA  
LADQPTTLMFHA EMLPPITDSVGDDVQTSMPPLAPAGPLQSYSTFLASRPASFETYAIAEI  
IQLASTAPNLPLHIVHLSAIEAIPLLREARANGVQITAETCFHYLSLAAEEIAEGDTRHKCC  
PIRSRLNQDGLWAE LERYADDGVIKTVVSDHSPCTPDLKLLPAHIMQPQQVDSAGSSDS  
SAVATPHNSSSSVSDYFEEETKEHEIADGNFFSAWGGISSVGLGLPILWTEISR RKKLG  
AAGGTKTVTQDLQDIARWCSTNTAAQVGLSSQKGD LAVGFDADICVFD DSAEWVVEPS  
TMLFRNKCSPYQGR TLKGMVRETWLRGQKVYSHSEGFNRVPAGKLLLEKRSH

>1527\_t gene=1527\_g

MTSHDDPEKKRVSHRIRSLSKSLHRLSSNNVPDRLKNN DDEQEDFTAPPKILTARDIPYM  
HQSVFSLIAAAGSR SDFHSRFDSSSDSGDDSEEKRRHDPLHRRLVGRLSNK TGKEVSSS  
QVIPEETGQEPRPSKIPSTSSVSSHRTGSGNRLLRSIPSIVTKRTDKEGKPDQAAEATQSP  
RNEVKPTQETTTTPRTAPVLSRMIEAQRFPAAALSTEEHAQAVTETDDKQSAEQSKSVL  
LPIRLKEIFGFENPEPVIGEYPCWLMQNVALQGYMYITEGHICFYAYLPQKSNVTVKSGQ  
LSKRGRKNPRYKRYWFS LKGDVFSYYADPSKLYFPSGHIDLRYGISASLADKEKGDTR  
DFTVTTDQRSYYFRADSASSANEWVKALQKVIFRSQNEGGRVKISLPLEDIIDIEESPM

DLAQTFKIRVVDIHETYAIDEHFFSFFNFGQDAFEVLKGLINDSTARRIAQDPNATQVLNA  
VVSESHRQRADSSASEKPKDAKLGTFSAQKSETSDQNQESDSFVQSMGQTESSLQSHPD  
TIVTASQILTRDDVFNSTPIHSLRPNTSLDGVSFESPSGKVLAEESTKKTGKEVSREPVDAS  
VERKSYVTAAPAIHELKAGTYPLQRAAGFAEYLKSRSRQMSSLLATESMGYIEKVSGM  
WIGGGKHYAEGEDPALEQCFDGEDAETSGTYGDRFRAHFALPPTEKLQATYYGYLHRV  
LPLYGKIYIGNSKFCFRSLLPGTRTKMILPIKDIENVEKEKGFRFGYQGLVLIIRGHEELFFE  
FNAADSRDDCAVTLHHRLESVRFLAQSSILLQKDKDEADA AKA EQQLLQEAMQGPVFE  
DSQEVHPIFDDPRASIVNFKPTESLRITCLTIGSRGDVQPYISLCKGLIAEGHRPKIATHAEF  
GPWILQHGIDFAPVGGDPAELMRICVENGMFTYSFLREASSKFRGWMDLLTSAWNAC  
QDSVLIESPAMAGIHIAEALRIPYFRAFTMPWSRTRAYPHAFVPEHKMGGAYNYITY  
VMFDNVFWRAMSGQVNRWRKTELGLRGTLDKMQANKVPFLYNYSVPPPLDYPD  
WIRVTGYWFLNEASTWTPPELTNFIKKAREDGKKIVYIGFGSIVSDPAALTRTVVESV  
QKADIRCILSKGWSDR LGDPKSTRSEVPLPSEIHQIQSAPHDWLFQTIDA AVHHGGAGTT  
GASLRAGVPTIIPFFGDQFFSGSRVEDLGVGICMKKLVGVFSRALWEATHSERMILKA  
KLLGEQIRKENGVATAIQAIYRDLEYATTLTRQRASLSTPLTATEENKPADEGEEADDIE  
GEESWTFVDDYTDPELLKNENLFYQKNFTSSPTSSPTLTK

>1567\_t gene=1567\_g

MGLFHKSTVLVYTALLLSSTFVA AIQYCHTGPEFCFAATTQRNISTESH DVYL TISATPS  
KKGGWTGVGLGHEMKDAVMFIYEDQESKSLITSIRSASGHVMPQVVEDADKQVKVLQ  
TTVSDHKYLAQFVCYSCWSPEVEIDGLSPYIFAGNKEQAFHGADKYSSLMYHDFKGNV  
WGDISVGAQDTTETSAPVIQGEDSIGITEKPPKDPKTEGFFTA VRVHGTIMTISFMGLY  
FAGSVAIRSPLIRAFKYHWMVQAGASVFALGNGLYMFLRSKHFGPHKIIGLIILCSLIQA  
AAGYKHHIDFVKIRRTIFTLVHRWLGRGILLFGTMNVGLGMYRHWSSAGLLTW FVI  
WCVELASYSYVLLRHQRQSQRGHAIPKEDLEADIADA E VFDIGDDFDEDEDGVEGVPL  
MERQNKHDKRR

>1596\_t gene=1596\_g

MLPIPLHVKPSPHSVDEMIRLTQQIALSKRQSYLRFVHLSRIRRRRDNLIGDLVELDRQQ  
RRSRKLQQC GAKLGCDSVEFYWSIKFQLETRRRRSK SILRRIHRLQLDHS LHL YEVM IWL  
AQNGDAEPLEHSDGPIETDVKIEDISWDLYKDTNKDSTVYGYVVGSSQNDFEGDVNEFL  
TCLNVYS

>1597\_t gene=1597\_g

MSDMEEKIGSYRVHNVYADLSEEERANYPEFALYDKQLEYQKQGGDTRELQGGWALG  
KYMNLAMKRKIWNMHQESRGGHDPSTKWFVFIDTDTFIEWENIL TLLNHLNHAKKMYI  
GSPVWLPKLQFAHGGSAYVLSYGAMKALNTPETDEKEQLLYSQFGFNTALCCGDEAL  
AWVLKSKGVSLKGYWPMFNGEVPTAVSFGGDLWCEPVISLHHLSGEGMRDLWQWIEE  
WKRKTSSMQPFLFKDLFQYIAPQLMSNRDDWDNIHESMRILPKSTASHTSFENCKAAACE  
LEKSCFQFVYD GATCALSDHIRLATSHVDQSTPTAINIRKDISIRFGSHSHEKGSDSNGTM  
GLRDFFKGVRKKDEGQNRPTTSNAPPTTITTKTSSSTLTTQQSVSQPATQNTSTTTLPGN  
PPYVKRDLWDEAYEALRAENEDLIQYEEIILEHDKQNTGPAVQQLAPPKSSRREEQLR  
QIVSHKIDEIDLAKWQIKAGSHSILRDQFDKAVKAVIAMKEFISSAVSSEPHAALAWAG  
VCVFLPLENPTKQSKDVQDCMETIPFVRRRLRVMERLIRPDSTQAQNTYHVDSIALIHD  
FEESTIKLYRTILEFQIRVGRQYSESWATRYGRDVFKADDWAGLKSQINTLESKCTVFAR  
DLSLERIEAELHLSDLHIHQHFQEQMQLAKTATSIDNQTTLQSTWRQTDEEREVVQLFR  
KGNPYENQKNRIPKR VSETCNWVLENKKFLEWEQSQVPDLLWLSAKPGSGKS VVAKTL

VDERLGKTQPGYAVCYFFFKDISTYQRSPTSAMAAILHQLFSAIPSLVRHALFPYELNGK  
ELPHLLDVMFDILVDAANDTAVTQIVCVMDALDECDEHERLFLIEKITNFYRESKSFTPV  
EKPKLKFLLTSRPYDDIQFQHQLVQEVP TIHL SGDEESAGISSEIDRVTVANVQKLAGEK  
GFDQDTTKFLQDKLLEVENRTYLWLSLIMEEIRTSHRRGNRREIERLVSDIPRSVMDAYD  
SILNKS RDKQLARELLHIILA AKTPLSLEEMSVATALAGDLSYQSYEDIGLESPVAFGRRI  
QNICGLFVTIDDGHVFLIHQTAKEYLMEKENEVSGDWKHTFRSNDSETLITSVCISLLSFK  
CFANDPLPDES VNVEEDES DGGSVSFDIGKNKYVSDLYLESHPLDYAARNWIEHCQ  
ECGLESQETWQPRITTLCDTRSLKYQRWYSIYRHADNRHLPEVMTSLNMAAEFGFYNIL  
RRFLEQGADPNPDAQGATPLQRAASTSREAIEILLKAGADANATGWNTPWVVEVDAN  
GSEREVKKFSGTPLYMAIRNKVDIVECLIQGGASVDLPSAGIVPLSLALIMAHWNDESLE  
IFQILLDHGADVTVKTSQPMMNIDMGWTPHLYAAHFDNIEAIEMLLKHGNVNINERAAT  
ESEIAAEIAEDENDIVESSKVEEQSVEEEDKEYKDDHTSSQNSEGNSDDESIDKKQAGN  
NDYDVRVFTVPSKDKDTSVYTEVSDSGSDDRIYTDSPNESTNDNESDEDNVTSSLAD  
SSTFSPGSTALLHAI DRQNVKTVKVLLQNGADMHIK DTHGTSALHFALSLRGYSEANKII  
GLLREFNTMEEVDWEWKPPSSRREYRHRG

>1606\_t gene=1606\_g

MHFFLTALLAVLPLVSGSPVPEKRTGCALPSTYKWTSTGPLASPKSGLVALRDYSHVIYN  
GKHLVYGTANTAGNYGSLNFGFLSDWSSMSASQNTMTTGAVAPTIFYFAPKSVWILA  
YQWGPYAFSYRTSSDPSNANGWSSPEPLFTGTISGSSTGVIDQTVIGDSTNMYLFFAGDD  
GHIYRASMPIGNFPGSFGSASTIVLSDSTNNLFEAVEVYTVEGQNQYLMIVEAIGANGRY  
FRSFTATSLGGTWTWPQASTESKPFAGKANS GATWTNDISSGDLIRTNPDQTQTIDACNLQ  
FLYQGRSTSSSGNYNLLPYQPGLLTLA

>1607\_t gene=1607\_g

MVYFSQLVVVLA AVHSVIAAPTEQTEASVQKRGP HNFVMGPDHPLMMARRNESLARRS  
TNYVQDYTTGGSVYFAPESGEYYVSWDTTDDFVVGWVGNPGSTEPITHAGSFDVESGL  
ASLSVYGWTTDPLVEYYIIDEFVGLTQSGTKKGTVYSDGATYTIWENERVNEPSIEGTST  
FNQYISIRESNRASGTITVENHFKA WANAGLNLGTLKFQVI AVESWNGKGTAYQTVTQ

>1618\_t gene=1618\_g

MFKYLAIVAACYPLGLSALKTPHISGWNPDPAVIRVGSEYFIATSSFEYFPGIPIYKSSNLA  
DWELYSHALTKTSQVQLWGVPTGAGSWAPSISYINGR FYLATMTRWYDPVARVWPR  
VMWISSPDLKEWSDPTW GDPWGIDPSLFDPTTNKTYLNLMSPNNNVDRLWGIYQCEV  
NLHSGRCIGPYLSLWNGTLP HNSSARPEGPKMFRNDY YLLIAEGGTDDLHRSTIARSA  
SPSGPFTPAPNNPLIFNGAWGYDNLTVQSTGHATMFTTESGDWYATFLARRKINGTSVL  
GRETFLT TTVTWDSDWPVFNDGKPILLSENIGKLPDAK KKKSSIEKFNRLSLDPSWYQLRD  
KYTQNYHIDDDGLVFHPNVFGLSDRDS PAALLRKQTS LNMTFSARLRDFKQSLGPLQSV  
GVSVYLSEFEHQDLVIRGCFNTTGNCLFTTIITNATFTTTALPLNSTLPGDITMHIWASPLV  
YHLGYSTVSNPEPTWLASVASSWLGFAP TNYFVFSGPSFALFASGNGNPWPFNAPDVGF  
SEVREEFYEENIPDYDVW

>1623\_t gene=1623\_g

MPSHSRTRDRNNTRDRAERDYYSRHRRYNKDDRTRGGEEIDYEEDEQ QEEYRRRRNE  
FAAARRGQSRGYETIEVEEEEDDDDEEVIDQSRSRHRSVPRQAPDYDEPPRTPRRSRP  
DREERYRDEYSSRRRTRDKTPKAKESPVTSPKKRLDREGYRRNTSRTRGGSPVRERRQR  
LRDDD GIRVVGDRERTRDEDQDRELRRQRRKERRDREIAAQKHTSTDSTNSASQLLSA  
DALAKLNDY YERERTKPNKQRDDDDNDRRERRRQRTRDIATEDENDRIRIEKRRDRG

RPPSQPERRASHRKEKKAFFYDDDDNDAEPLSRHKQGRRLVSGAVMEEGRSNKLEFFWKR  
FGRRSDPITEKDIADYPVDDGDDGHGGRGGGAFYSRDLKDPDGDDYDHVPFWRRKRNL  
IIAGIVLLLLAIHPVAIVESRKKTSSTSSGGSGSSSSYGPYNSSLSTISEDSIPASAKGTI  
LDPFTWYDTRDFNLTYTNETVGGLSLMLNSTWDDSAQPNSNPALNKNFTYGTTPIRG  
VNIGGWLSIEPFITPSFFSKYSTIDGVIDEYTLTKKLGSAAAATIEPHYATFIQEEDFAEIAA  
AGLDHVRIPYSYWAFTTYDDDPYIKQISWRYLRAIEYCRKYGLRVNLDLHGLPGSQNG  
YNHSGRQGLIRWLNGLDGTNAQRSLDIHNQLSQFFAQPRYQNIITYGLANEPPLSLD  
VSTVLNWTIEATEIVQKNGITAKISMGDGFLNLDKWEYMMKTDVPSNLLLDTHQYTIFN  
INEIDLNHTAKIDLICNSWLPMEKVNSTNGFGQTICGEFSQADTDCTQYLNNVNTGTR  
WEGTSGSSTPDCYTKNSDCSCASANADVSSYSSDYKLWLQTYAEAQFAAFETAMGW  
YWTWQTESAPQWSYKQARAGGFLPQLAYKPNFTCGDTPVPSFGSLPEYY

>1634\_t gene=1634\_g

MLQTPCASLVKAASAWLALDLITTSATYLNSSNPGYNCHAGQSCWPTIKEWESFNSSL  
GGNLHRTIPYAASCYDPSYDPSACIIAAENYSVNQARTEVYGAATGLNWEVCQTQTC  
TLDPYDPTVVYSDQCSLGRSLSYVDARNASHVATAVKFAQQHNLRVSIKNTGHDYFG  
RSTSPNTLAIWTHNMNITYHEKFTASKCPASNGQNIGEMGAGAQAQAGDVYSSFADLNFD  
VTGGNEGSVGLAGGFGQGGGHGVFGPSYGLMVDNAVEYDVVTADGEFRTINQCNDPE  
LFWAMRGGGGGFAILTSYRFQLYPSVKINVHSFRANFTLPNETSNYAVLEDILAQHVT  
HQPVWSQNNVSGHAYYWADKAEIYLVPSNNTALKSLTSEFSSSLTNQTGIHVSESTYT  
TYPNYTGFLDLTSNIATRLTPGGIFDVLTSLVPSLFTNTVGLVDATIEGLRSLNKYIPD  
EGIAMTQVIMTTPINTQNGNDTSINPAWRTALWHLIMTGGWFDVLPPTKENAMVESWL  
ETIEPLKELTPGGGCYVNEGHYLEPEWKETFWGSNYPELLRIKNKYDPHFDCWKC  
WCVG  
WEGPSE

>1647\_t gene=1647\_g

MAILKKWLSVLGLCAALGTSSAIPSSSHLASTTIVYHNLGDWTQHGVNPSVILFNEPATY  
QDAVKTCASYNETLLNCRELYNYEAEELGYQAWLGTQSEELWTSCDSSHPSDFQKIS  
SEAQNDRGEHKYPFLCTNSAPFVGQVDTDYSTFPVTRTPAIDGIAFEGLRDHMA  
YRFLGI  
PFAKPPIDDLRFQYAQPPDYQSGSVNATRYRQACMQVGSFEGNAAGLNPWGNS  
EDCL  
HLQVFTPTLPTTLPKTSSQGAPLKPVMLWIHGGAMINGAGSDSTFDGASLVSRG  
DVVVV  
SINYRLNIFGLLTLNDGVVNGNYALSDKIAALEWVQKYIRAFGGDPDNTIFGQS  
AGGA  
SVMDLIVSPKARGLFKNAIPQSLAGNVVNQSVIEAVMAPYIEPLCPGSAGQEGR  
LECLRQ  
LPAESLLNISTTYWSWSTVVVDGVYIDQPLSLVAERKINDVNVLMGWMPEEAQ  
SLLSTS  
IAPNMTNLTVGLDNLVSSGIITSSQASTLFSSGLWDVPQDYTDAYNATVNIGT  
DGEIICHV  
LEFVDASTASTSSNAFKSLWLYTHQRAYALSFYSFYDLCTFPINPDTPYRCHS  
GDLYE  
VFGTYLFSQPVRVYGDMAYNVQDMWTSFAKTGNPNPDPKYL SVRQYGS  
SIDFFHG  
FEFKEYAASKKVMELQWPKPWASGLPDREHCELLNTTFGR

>1734\_t gene=1734\_g

MKFTEGMWLLREGVQIDWMNHVERATTTDNTVDLLMAKTQRHRGDTLNSGTISAH  
ISS  
PQQGIIGVRLVHWDGGVDRGPHYEIKSESPAQEVQIDNKNTEQIRYSSGPLTLV  
VTTAKNE  
LGFRFTGPEGKLTGHSFRSVGYVRDQSTSKSRYEDGMFMEREGYMLAALDLG  
VGEKIY  
GLGERFGPFVKNQSVDIWNEDAGTSSNMAKYNIPFYLTSAGYGVFINHPGRV  
SLEVQS  
ERTTRVNVSVAGEEIEYFIIYGSTPKEVLKRYTQLTGQPALVPAWSYNLWLT  
TSFTTYD  
EQTVTGFLDGRQRDIPLGVFHFDCFWMKSFQWCDFFDSSMFPDPAGYLQRLK  
DRGL  
KISVWINPYIGQASPLFKEGKKGHFFIKRLDGA VVQWDLWQAGMAIVDFTN  
PEAVRWY

SKHLERLMDLGVDSFKTDFGERIPFKNVRYHNDADPTLMHNYAFLYNKIVYDVMTRK  
TGKSQSLLFARSAAPGGQFPVHWGGDCESTFEAMAESLRGGLSLMLSGYIFWASDIGG  
FEGTPSPALYKRWVQFGLSSHSRLHGSSSYRVPWIYGEDCSEVLRDCTKRKIKLTPYLL  
EEALEGHRTGTPLMRAMFLEFPKDLNTYSIDTQYMFGSNLLVAPVFNEEGRVTFYVPHC  
GDENDNTQGKWRSWFDYSKTYECGRWYTEKHEFDLTPILIRPGSITPVNSKIEKPEDDPL  
NGLELLVNGTIVGQKEIIVNPGKTHEVLKTIQVTSAPETSEKVKLSDDSIKITQLE

>1735\_t gene=1735\_g

MVKLTCLVTLGLALSTAAKDAGSKRPKYKDPSVPVEERVSDLLSRMTIEEKTAQLIQGDI  
SNWMDPDTGAFNQSGLVENMKLKAGSFYVGYPSPASWIAENIKKAQDYLVNETRLGIP  
AIVQSEGIHGFLLLNATIFNSPIAYASAWNPDLVNKMAQVIAREGAAIGVNQLFAPVSDV  
ARELRYGRVEECFSEDPYLAGEMSYSLVTLGLQALNVSATVKHFLGYAQPEQGLNTGPV  
HGGERELRTTWMPAFKRAIVDAGAWGIMGAYHSYDGLPAVTDQSMLTDILRGEWGKY  
YWWISDAGATDRVCNAFKMCQSDPIDSDAVTLAVLPAGTDVEMGGGSFNFKQIPTLVSQ  
NRLDVATVDTAVSRILRAKFEMGLFENPYSSSVAEENWSSLIHTSDAVELARTLDRESIV  
LLENHNNSLPLKKSISIAVIGPMAHGFMNYGDYVVKGSQYHGVTPLDGIRAAIGDSVTI  
NYAQGCERWSNDQSGFTEAIAAAKSDVAVVVGTWSRDQYELWAGYNATTGEHVD  
VNNLNLVGAQSALVKAIAAGTGIPTVVVFSSGKPITESWIANSTAALVQQFYPSEQGGNAL  
ADILFGDYSPSRLSISFPYDVGSLPIYYDHLNSGRSIGDSGHIDDNGTIVFGHQYVIGTPE  
PWYPFGYGKSYSTFSYSNISLTKVNATFSDTVTAEVNVTNTSPVTGTEVVQLYVVDNIAS  
VDIPNKRKLGKFKKVKIQAGETA AVKIDLSVQDLGLWNRKMQYKVEPGQFTILIGRNAED  
IITNATLWVS

>1784\_t gene=1784\_g

MKSQTLAVGLILATGLQKASAGHQHGGQHAHFNKNPVSQEYATTTTTTTSIVEVTTITST  
ITVTPRVESTTTPVAEVSPTSSEPPVYSAASSAFSDSEAGSAVPVTIADVQGSSTTSTS  
RSHTSTSKPHTKSRITSSHTSTTIRAVSSTSSLTPNGIKAGSAGGDAYPFWSSHIGWWYD  
WTPAPLKNYPDNTGSPVAMLVGDGTVSSGDALRYHEFLSLSTAPQYILGYEEPDCAPP  
DSADISSEKGAELWNEVVPWKGKGSLLGSPSMCKQSDDEDWLTPEADITTSWDFTAIH  
INTISMDVVNKDLDYWNTYNNKPIWVTEFACVDTSNGFTPSENQTQINQFIADIVDLLQ  
NDDRVAAYAYSSGAGLGDTWPPVRDGLKTESGQAYLDAIRRYA

>1809\_t gene=1809\_g

MSYGRKDFLSQPAPENYVAGLGRGATGFTTRSDLGPAREGPTPEQIQEALAKRAQQLGA  
PTPTAYNTSREKGGKKEQEAQEEDDERFQDPDNEVGLFAYGAYDREDDEADLIYQE  
VDEKMDRRRKARRLVPSHFSLSQVFGVSFSRRRLHHLPIYLLWTESRLDSFDA YREAR  
EQKEREYERNPKISQQFADLKRSLATVSDDEDWANIPVGDLTGRNRRARQNLQRFY  
AVPDSVIAGARDAAQFDTTIAEDGTQTEISSATGGDGSLTNFADIGAARDKVLQVRLDQ  
AALGSSTEAASGATSIDPKGYLTSLTKSELKAGEMEVGDIKRVRLMESVTRTNPKHAP  
GWIAIARLEELAGKIVAARNYIAKGCELCPKSEDAWLENIRLNENHNAKIIAANAIAKHND  
RSTRWLIEAMKLETDVRAKKNVLRQALLHIPQSVAIWKEAVNLEEDPADARLLLAKATE  
MIPLSVELWLALARLETPENAQKVLNAARKAVPTSHEIWIAAARLQEQMGTANKVNVM  
KRAIQALVRENAMPKREEWITEAETCEEAGVLTGCAIIRETLGYGLDEDDDRRDIWME  
DAKANIARGKYETARAIYAYALRVFVTSKTLWLAADLERNHGTKEALWQVLEKAVE  
ACPQSEVLWMQLAKEKWQAGEIDNARLVLKRAFARNPNNEDIWLA AVKLETDKETE  
HARELLSTARREAGTDRVWIKSVAFERQLGNMDEALDLVNQGLQIYPKADKLWMMKG  
QIYESQKKYPQAREAYGTGTRACPKSVPLWLLASRLEEKAGVVVKARSILDRARLAVPK

NAELWTESVRVERRANNISQAKVLMAKALQEVNSGLLWAESIWHLEPRTHRKPRSLE  
AIKKVENDPILFVTVARIFWDERRLEKAMTWFEKAILADSDQGDSWAWYYKFLMQHGT  
DEKRQDVISKCVISEPKHGEIWQSVAKDPINFHKSTEEILKLVVEQLPR

>1836\_t gene=1836\_g

MVQILSSIFALSTLLASTLALPAGYSERSGNVSVTWDKYSWMLNGERLLVHSGEVKLPN  
PALWLDIFQKVKALGFNAISTYINWSLVEATKGTIRMDGIFAYDEFFKAAQAAGIFVIVR  
PGPYINAEASAGGFPGWRMHAPEGVNWVRVSNQSYDEIELYIKTVGEMLAPHQITEGGP  
IIMLQLENELSSPAVPGTAFPPTGYMDYLSNSFAAAGMVVPTFHNDVSHGGVWAHVDP  
NVYAYDNYPLSCNSIPDSMNQNDWSLYQQYSNTPHMAEYTDGFYDSPGGPGYSNCP  
VMLDAGVTRLFYKDLHAMSVTSLNLYMIYGGTNWGHIAWHNVYTSYDYRAAIAEDRS  
ITREKYSEIKLQSQFLKVSPAFLTSRLTTRATSFAFTNSNVVVTQTKDDESDTTFWTSRHA  
APQDTSTVTFSLKIPTSQGDLTIPQLGGSLTLQGFDSRMHVSDYAIGERTILYSTAEILT  
KWDSKYVVILYGVAGETHETAFIGSTGNDTCVTISGSINHCQSKSGTVVVNYETSGLSV  
IGSEILLYILDRNTAYTVWDPEVSSNDAIFVKGPYLVRSAVQEGNKLSLTGDLNSTTEVEI  
IAPGAINTEWNGNLIQTSITPYGSLTGTLTFTQPTISLPDLTQLTWKSHNSIHEIMDTY  
GWTANKTTSVNGARGLTTPVSLYAGDYGHAHLFRGHFVAAGTESGISLELSSGG  
AFGYSVWLNDFLGLASGGSPWLDSAQFTLQFPSSLSQGNVYVLTVLSSENTGYNENES  
GGITYPRGILNYNLAGSSATIQWEIAGNLGGENYTDLVRGPLNEGGFYAERMGWHPNPPT  
QGWATKSPQGVATPGVEIFTTSFDDLPAGYDTPLAVSLQGTSSIRVHLYINGYKFGIY  
AQNIGPQTVFPVPEGIINHQSNTIALIHNWISPNNGKLTTLSTTGTYSQSGYGTIAPV  
PQPSYTPRPNSF

>1837\_t gene=1837\_g

MLISLFLAATVVGSTQDPSYILNFHAPGPVGYTATEFVNALPIGNRGLGAALYGPANE  
VITINEDSIWSPQEQNRLNPNNGASSLAALRAALLSDDVTEANAIYANFTSNPTTSRYAF  
LADLVLTSSHSTYSNYERTLDIQNALLNVSYESGGTTYTRQWIASYPAKAIIGSLTSSTPG  
GLSFAARWNRTGLTDGTRIGNTTSVGRDTSVILAGLPDGAPNYAAIFSVVPVGGSSITDN  
IVTVNNADSAIIVISAETDYWNGGFSAPQLNLFVESHISNAISTGFPTLYSQHTADFRQFFD  
RTALNVEPATDYSLDITGRYKAYLSGTADHALEILLFSFGRYLMISSSRAGSLPPNLVGI  
WNPQNDPGWGGKFTTDLNVEMNHWTETTGLSEMSLQLFNFTQSRIIPNGEITAKTLYN  
CRGWVSHHNDLWGDTPHNRGTSYTFWPMGGAWPMTHLYEHWRFTGDMDFLANT  
ALPILTGLVEFYNDFLIERDGYLVTAPSASTENSYITGGVNEAIAIGPTADNYILYEIYTN  
FINASTYSGSTYLLQEAESVRSQIRTPFIPNYYGGIQQWEDWTEAYNSQPMMDPILGLF  
PFSSMATWQPNGNVTAMAETNLNHYLSETIGNSWSVVWPIAFWARLYNGANAYAAIQ  
RTLNTMISYSGATWTMNSGSYQIDGNLGYAGIAEMLLQSHGPSDSWPIMLLPALPSTW  
ANGAVTGLHARGGFTVDITWSNASFQSANIYSGLGWNLNVSFNLPAAGYSKFAIQELDL  
TSENGWIFIHSTQGTNYTIIPVSD

>1845\_t gene=1845\_g

MDYEKPLNPNENGELIQNALRSIIIPNVDDVRGSITLPTTIEDLPEMQITWTSSNPAIVSDK  
PNGKAAPGVVRRPPVGAAPAQVTLTASVAIKSEPKITDFSRDFQLTVQPSVKLAPYSGY  
GMVNFARSNSHRGQQVYMAYSVGNDRWKAANSQPILTSTKGVHAVRDPPLIRSRE  
GDRFFLVATDLNVDGVEYGRGWDAQSGSSRYIEVWESRDLRNWSNQRHILVAPPE  
AGMTFAPEAIWDPEIEAYVFWTSSMYPADTYFTEDPNDPKRRYPLTRNQTLYATTRDF  
ITFSPAKVMSGRPNHGTLDACMIYEEETGYHFRICDRISTGVGVTRYAADCPDIDIYQE  
RSQRVLAPEEDWQLVACCITHKAMNTTYAEAPLVFQANPGDQRGKGYFYFSDQIWADS

PAGQPMEEQLHPYWTSCSSGQWTPIEWTKPEYEGSHGVIRHGTVINLTSADHAAVRG  
ADLVSLSVQLSAKITCFTEEPLDSSALVVTAKYSDAVTETLGEGYGGYILTGSGPWRTPG  
EYTVEVSYSVLEVTQTASFNVEVIERPTVF

>1853\_t gene=1853\_g

MAVIHIASLTFEHHPTGFGIGHERPRISWNFSCNDDNFKNWVQSSYEIQIRRQNDTEKYH  
VESSSSVLVPWPGQALCSRERAWVKVMAHGKARNAAGEVITASTAWSEPSIIEAALLDK  
GDWTANLVTSTHMDIKNTPMRPLIFRKVFQLRPGSILKARLYITAHGVYHAYINGHRIGN  
EEMAPGWTSYNHRLLYQTFDVTSLIEGTRNVLGIEVGEGWFAAGRLGMDQKRNFYGDQ  
LAFLAQLEVTFELGENVLVNSDSTWKSNTSATTRSEIYDGEDYDSCEEHWGWNDPNL  
DEHDWLPVTPQLPFPRAKLLASDSPVRIVEVIAPVRIFKSKSGKALLDFGQNLVGLKLRVR  
LPATTETTKISISHAEVLESDDELGRRPLRGAKPVDNVVLSRQPSSWSPKFTFHGFRYVQI  
DGWPVDEGFPHREDIAALVMHSDMVRTGWFSCSESLNQLHHNVVWSMKGNFLSIPTD  
CPQRDERLGTGDIQVFSPTANFLNTRGFIGSWLEDVAAEQLESSKNGVPLVVPDVF  
DNPPNPPGPQSVWHDVTVLPWDLYNSSGDIDILRRQYESMKAWVDKGIKRGPNGLWD  
QNIWQFGDWLDPASPPSEPLGRTDSLFAVADAYLVRVLGIISKISHLLGETEDATRFKAD  
ESNARKAFQYEVTPSGLLVGDTQTAHSLAISFRLFDNHDHLVKSASRLCHLVHLAKYR  
IATGFAGTPLIAHALSDTGNHQLAYRMLLEKECPSWLYPITMGATTIWERWDSMLPDGSI  
NPGEMTSFNHYALGSVANWLHTNVGGISPLDPGWRTIQVRPVPGGVLRNANVAHESPY  
GRIECSWSINESDDTFALTIVVPPNSEARVILPSAWKENQQEVEEESIRVSGSKYNFSCP  
YKPAQWPPKAELARSTFRLEV

>1854\_t gene=1854\_g

MASKRMALVWLTALLGIMPTAGAVTLNVATEGGNATSPIMYGLLYEDVYHSGDGGLY  
SELIQNRAFQGTSDVNNQGPYQTLQYWHQTQSDTLTLDNDAPLLTSALPWHMRVDVAS  
DATGPTGFWNEGYWGMNVTTASTYNASFYVRGSYTGESIAAFWSNNTGSMLGSTSFV  
NQTEADGWVSYSTQTFVPTQSGPDEKNTFHITFEKSNVAGGSIRFQMISVLSQSFNGSPNG  
LRMDLAEAVNELNGKYLRLPGGNNLEGIASPYRWKWNETIGPIITRPGRPGTWGYVNTD  
GLGLLEMMQWCLDMNLEPILAVWDGLYLDGEIVDEADLQPYIDDVLNELEFLTGPSTSE  
WGSKRASLGYSDPFTINYLEIGNEDFLNGGIPSYLAYRFSNFYNAVKNIEPNMKVISSIW  
AGYFTDSSLPVNVIQDLHDYLSADDMAAKFNGYDNAPRTYPVLVGEYAAIYDAQHTSP  
NQLDNPTLQSATSEAVYFLGLERNADLIVGISHGALIKSLHDEPDNVAMIKHSPTSIVRSM  
SYAAAKLFAATNFGSETVAVTGDVAYGPLYWAATKNDSGTFEIKIVNYGGYSSTPVTVLV  
SGKTNVATLKTLSAPDMYSTNTLGDQTQSIWTETQISVSEGGYSFTLSGAYIMAVLVV

>1875\_t gene=1875\_g

MGGEAHPRAPPSSYPKLVERPVGQHRSIYLDRLRQFTDEGLYREDGLVSKYYDAVVSD  
QEHVKLFVYSPPNLSRPTFEGATSHEFKPTSTGNAFGPSWSTHWFKIHLTIPRDLGKERL  
EFHWDAGNEGLIWTEHGHPLQGLTGDGERIEWIIPESFRDGKEHVFIEMACNGMFGNG  
NGNSIAPPDENRYFTLSKAQIVAVNLDARALYYDFWIIIGDAAREFPQDSWEQHEALMVA  
NSIMDTFIAGGGSKQAIKDARKIAQQYLGDVRVSHKVDYTDTEAVVYAIGHCHIDTCWL  
WPFATKRKVARSWSNQCCLMDRYPEHRFTVSQAQQYKWLKTYYPVDFRVKSYVKK  
GRFQPIGGSWVEHDTNLPSTGSLVLRQFLYGRQLFESYFGERCRTFWLPDFTGYSSQLPQL  
CQLAGMKRFFTTQKLSWNNINFPHTTFNWWALDGSQVLCHMTAETYTASAHFGDVR  
SITQHKSLLDQDKTSLLVFGKGDGGGGPTFEHLEKLRRRCRGLSDKVGLLPRVKMNTSVDE  
FFDQLQEKAAGVNFNFTTWYGYELYFELHRGTYTSQSNKRNRNRTAEFLLREIEYFATLAT  
VGKTKSSYKYPKEDLDNMWESVLLCQFHDCLPGSSIGMCYEDTKEIYAEVFATGHRLLK

KEALAAALGFSEPKSGENVQYINTLPWQRSEIVKLPEAVCQSNEPSYAQISGRTGTIDVSL  
NNSQTPRVSIEVKPGVFRLTNEKLVKDIQDGVIVSLYDVEAEREVISRGGKAGQLVIFD  
DKPLYWQAWDVEVFHLESRKELKSSSTTSIAENSPHCVSVTETQISEHSWIKTTISLKAT  
VDNEPSYVEFDSEVEWREDDKFLKVEFPVDVHNTASYETQYGIVRRPTHYNTSWDMA  
KFEVCSHKWADLSEFGYGVLSILNDCKYGFATVGNVMRLSLMRAPKAPDAHADMGRHH  
IRYAILPHSGPLDHRTVRAGYNFNQPLTAVSATSKSTGAFDAIHMTGSKALILDAVKRGE  
DDEDVSRGELAKRPGQSILRLYESLGGKARGAIHTTLPVKKVWKTNLLDNEVEFPVQ  
NHKDATLEGQKSVDIELRPFEVATFRLQL

>1896\_t gene=1896\_g

MAVTQETISKLSGDALRQISKPYFYREAYLRPATIQCHASNLLRLSNGDLLCAWFGGNM  
EGKPDISIYLSRLEFGKSQWSEAIRVTHDNTRSEQNPVLFRTDDTIWLLYTSQHRGNQD  
SAIVKRVASHDNGYTWNNENPEVIFSEPGTFIRQPVVLDNGNLVVPTFKCRVDAGEKW  
GNDDISAVRVSQDQGNWSETPVPESTGCVHMEIQQLKDGSYLSLYRSRWADFIYSSTS  
PDGIAWSPPKPTSLPNPAGICFDVLSGRVVVVVYNHSSRQATGRRTGLYDEIGDDEGD  
NRQDQTAKEGKEAFWGAPRAPLCAVWSDDNGKSFQHKVLEDGDGFCMTNNSENKL  
NRELSYPSMVGDDGTIHIAFTFWRQTIKYVQIRNDDFFD

>1925\_t gene=1925\_g

MARKDKSSSEFVPLTNRSHSSASFSSTDSLSSDGSFLGDDDDVDALPSLKTTKTQLQEE  
APYRDVDEDVEVERGDDIFLHPIQSKRNRGSRLIWWVGLLCLGGWILAFVLFWGRRN  
NSELSSSIAAVHDAESATGATSYGKPLTLDVNLGAWSRRRHSISWIAGPNGEDGLLLER  
GEEGKKGYLRVESILSRQNESNAGEGWVLMESGTIDANGKYLQPSETWPSPDFKSVLVA  
VDSVSNWRYSFTATYWIFDVTQTAQPLDPAEPKGRIQLASWSPQSDAVVFTRDNNLYL  
RKLDSDKVTQLTKDGGKDVFNQVDPWVYEEVFGTNSATWWSNDGKYVAFLRTNEST  
VPEFPIEYYMSRPSGKKPPAGLDKYPDVRKIKYKAGSPNPVVTLQFYDVESAGVFSVDV  
SGGFSDDDRITEVWASNGKAIKVEFNRESDIVRTVLIDVASRAGELIRVDNFVQDDGG  
WAEVTQSTTFIPADPANGRPDDGYIDIVVHEGYDHWGYFTPVNNVPIILLTSGPWEVVD  
TEPAIDLNNIVYLVAATKESPTQRHVYSVKLDGSDFQPLTDVSKTGFYDVSFSGGGYAL  
LSYEGPHVPWQKLISTPSNQRFEVIEQNEELSNMIEKYALPAEYQNTIDEVTLQVVE  
RRPPHFNPIKYPVLFWLYGGPGSQSVDRRFSVDFQSYVASTLGYIVVTVDGRGTGHIGR  
AARTIVRGNLGFWEAHDQIETAKVWAQKSYVDKDLAIWGWWSYGGFMTLKTLEQDAG  
QTFQYGMVSPVTDWRFYDSIYTERYMHTPEHNPTGYEHSAINMTALQQNVRFLVMH  
GTADDNVHFQNTLSLIDKLDVAGVENYDVHVYPDSHHSIFFHNAHKMVYDRLSSWLVN  
AFTDEWHHVNSALPVS

>1943\_t gene=1943\_g

MAIPFVFTLAWLLPVVLAASLTQVSNFGDNPGLQMYIYVPNTLASKPAVIVAMHPCGG  
SAPSYGYDYHTPADQYGYILIYPGATRDYNCFDAYSSASLTHNGGSDLSIVNMVKY  
VISTYNADSSKVYMTGSSSGAIMTNVLAGAYPDVFAAGSAFSGMPYACLYGAGGADPE  
MSNQTCSSQGISHTGQQWAAVYVHNGYPGYTGKYPRLQVWHGTADNVIYADFGQEIS  
QWTTVNGLSFTSNQTNTPLSGYTKMIYGDGSQFQAFSAAGVGHVWPTDVSVVLDWFGI  
TGSSTTTTTTSTKFTTTTTTTTTPTTTTTSSPTSTSTGCTAAHWGQCGGIGWTGCTTCVSPYTC  
QNLNDYYSQCL

>1996\_t gene=1996\_g

MRYTPFLSALAAAFESAAAISVTGAAEGFAKGVTTGGGSATPVYPSTTAQLVSYLGDSS  
ARVIVLDKTFDFTGTEGTTTSTGCAPWGTASACQVAINQNNWCTNYEPNAPSVSVKYD



NAGILGITVASHKTLIGEGTSGIIKKGKGLRIVSGASNIIIQNIAITDINSKYVWGGDAITLDG  
ADLVWIDHVTTARIGRQHLVLGTSADNRVTVSNSYFDGLTPYSATCDGYTYWGIYLDG  
SSDLVTFKGNYYHFSGRSPKIQGNTLLHAVNNYWYDSTGHAFEIGSGGMVLAEGNVFQ  
NINTIVQSPMDGQLFTSPDTATNAACSTYLGRACVVNGFGNSGTFNEADTAFLVDFQGK  
NIASAAAYSSIKSTVPSSAGQGTI

>1997\_t gene=1997\_g

MLSVVLAASLLAVPALADLESLSGRGRTYWVHEPDDLEDGQIYPAIIAFHASSGIGF  
NIDGFAMEADVRLSLPAIPTAYSSDRYFIYPDGVDGYWAGPTYANVSVAEDLQFVSDLIE  
DIKSKYSIDSNRIYATGLSNGGGFVGTIACSEVGGQFAALAPVAGSFYTDVSGTGCTPAR  
SPLPILEIHGGSDQTVFYAGGEGEGGPLPAIPTWLGWYQQRNGCTSNTVSDSGNVHH  
TSWICGGQNGTLQHWKVDANGHDWPSKTINFDMLAAGMGPQPIEANDIVTEFFDQFSL  
SD

>2011\_t gene=2011\_g

MPPLRLHIEGHKFRDPYYREITLRGINVAGDAKYPKNPDIPSHVAEGFLDGDNVSFVGRP  
FSLEEAPFHFRLRKWGYNTIRYIFTWEAIEHSGPGKYDDEWVAYTIEVLRIAKQYNYFYV  
FMDPHQDVWSRFSGGSGAPLWTLYAAGFNPNFNKTQAALVHNTWPNPSEFPKMIWST  
NYTRLVCQTIFTLFWAGRDFAPKAIIDGRNIQDYLQEHYIAACRYLALKIHEAGDLEDEV  
VIGWESLNEPNRGLVGYQDINVVPPEQQLQLGTSPTAFQAILNGSGRACEMSTWAFGSF  
GPYETGKELVDPEGESAWLPANYDDTKYGWKRDPNWRLGTCIWAQHGVDWPSTDELL  
QNDYFSKVPKTGEPLNYDVFNTYFMDHYRAFRDAIRSVHSNCILLNQPVMVPPKPK  
GTEDDDPNMVHAAHYDGLTLLTKHWNRMYNVDVIGVLRGKYWTPAFVAVKVGETA  
RNCLRSQKFLRDESFECMGDHPMIFSEIGIPYDMDDKSAYKTGDYSSQISAMDANHFAL  
EGSGSNGYTLWVYATQNDHEWGDQWNGEDLSIYSRDDLELPSSLSDSTLTVDRNPSFS  
QSSSSNDNGKITHHNIKNIETPSISRQSSKASSEPEGKPGFRAGEAYIRPSAVYTNGDLLA  
QGFDLKSCKFTLSLYADKPTTQEAPTEIYLPEFHFPATEIGVTVSGGKWAIENREESSYSF  
QVLKWWHGEQDQVTIQGIKRVSGLIISPEDES YLDQCQKNC SVM

>2012\_t gene=2012\_g

MSGKAALKA VKSALDSKDFELAASKAKDLDRDSTNYHAHVFLGLAQDKLGKTEEAES  
SYLAASRIKDTDKTAWQGLITLYEKQGSNKLDAYRDVTVKLGQILAENDERDRCVDVV  
DKFVKFTRKNGNRAQQKQALHIQLPTCPLYPSLEGRVPHPSDTYSRLIELTETEEKEFINR  
EIGERRTRLGARIDQVTAEVKREALTNPELEQYRGLIDWTGNDEIRHQTEERLLQRAYD  
LLLVL PQEQKSVKREEVIRLARDMVIKHPFLAWKIELEWKDVEDFSGWDPILLRDFTE  
FFPENGLSKVLQGF LKGDLSPPVETELQESAQAESSDEKAEVAELAVEDRLILMSSGLE  
QSSDSIISHRIMAQLYLNLEEYASAVEVARKGILIKDITKNTGLGLAHTTDNVNTTLATA  
LISYQSPRNHPEAKGIFESILKRKPKNTKCLLIGLILEEDHDYEEAYNFLQRARERDPSN  
VKIRSELAWCTALNGDLESGLEMLQDVLAEVGDDETQNREFKAEILYRIGHCQWELDPS  
AASRKDRSGAYASFLASI QANLNYAPAYTRLGIYYADYKDKSRAKRCFHKA FELSSSEI  
EAAERLAKAFANKQEWDLVEAVAQRVVD SGKAKPAPGSKRKGHSWPYAALGVVQLN  
KQYTKSIVSYQAALRISPGDYHSWVGLGESYHNSGRYIAATKAFEHAEALEATLSKSES  
NNIWF SKYMLANVKRELGEYDEAITRYEDVLTIRLNEFGVMIALLQTLTESSWKNLDTG  
LFNDAAKSAHRALEIAMAMAKTPNVFNLWKAAGDACAVFSYIKAKSGHLHLSELRS  
LSIDAPDGVYNILADTDDVGSNHVIFNASEEGLSSSSDL CMYASILAYKRAVYVSANDRH  
GQAVSWYNL GWA EYRAYRCIEGDTNTKREKRHTKFLKG AIRCFKQAELEAGNSEFW  
NSLGVVTASLSPKVAQHAFVRS LHLNDRSAQNWTNLGAFY LINNDLQLANEAFTRGQS

ADPDYAPAWLGQGIVALLYGDPSEARALFRHGFEISTSSSTLTKKQYTLFLDRLLEDASI  
SNELSQLIQPYFALQQLHFQEPSALSFEHLSALFAERIGEYAQAESALSVVCTGVEAEYEV  
SESSSLVRFALANADIARVHLANHEYEQAVEKAELALTLSGDDSLATPDPSMVTSLRLS  
AHLTAGLSYYYLKSMDQAIDMFRDALHEAENDPEVVCLLAQVLWAKGGEEERNVARD  
QLFESVEKNPEHIGAVTLLGAVALLDGEDAIEAVHADLENMRTRDDIEIHDRARVVKL  
LSAISAMGFSADSDIPEAERLVIEASRAVMLAPGLPQGWMEHTAATGELHPATIAVKTAL  
RNVPPHGGDLDAVDLCKAYVQTGTIGDSLRLGIMLAPWKADGWASL NESLSDAV

>2022\_t gene=2022\_g

MQIARLLAHVVTLSQQTVRLNLPFLAKAQIRLLSIFALAYLTILLLLRWRVSHDPGSLFFT  
VQGYAPKYSRLRLQQAQAFLLQSIQSDTESVKQTEQTEIGTVAPRLCIGMPTARRSQEQ  
YVDITIASLFDHLTPQERAQIQFNLLIAHTNPREHPFYDESSSTVNASRVADKVVFPDIA  
GSSKSMNTNRIHQLEKQSKFNEKSYDYSLLIHQCVGSLAPYILILEDDVLAQEGWYART  
MDSLQKLDTEPENFRGEWLYLRLFFTEKFQGWHEHWPLYLLWSCATVSLVAVILLSL  
RLRLSSLLASPSLPYPRFSQRRSSKDHQLLSLPIFVVSCLFVPALIIYFAAGPQTVQPLRP  
GIHVMNNYGCCSQAFVFRNMSLALMDWFDERATDMKFADPTSNDNDRKYLGRSID  
SAMEIFADERYLQRYALVPSAFQHIGARTYKESGDSGARDLYKVSARGIWSFGFEQLV  
PPS

>2046\_t gene=2046\_g

MKTTLFASALLGHYVSAQTVGAWGQCNGINYSSTTCVSGYVCTYENPYYSQCIPGTA  
TTTTSTLITTSRTSSTTSSTSKTTSSKTTTSSPTSTGFSKVNGLNFTIDGKTNYVGTNT  
YWLAFLSNNSDVLVLSDIASSGMKILRVWGFNDVNTVPSAGTVYFQLLANGTATINTG  
AYGLEKLDYVSSAEAHGIKLIIPFVNNWSDYGGMAAYVTAFGGSQTTWYNTAAQAA  
YQAYIKAVVSRYSPPAIFAWELGNEPRCNGCNTSVITDWAETTSAYIKSLDSNHMVTG  
IEGFGLDAGSDGSYPYTYAEGTNFTALLSVPDIDFGTIHLYPDSWGEALSWGSSWVSTHG  
AACASIGKPCILEEFGTTSNQCANEAPWQATSLDTKMGADMFWQYGDTLSTGQSPND  
GNTIYYGTSTFTCIVTDHIAAS

>2047\_t gene=2047\_g

MLLPVLTKNLGPTPRSSLLTTTLTLFLLISTPAAQNTTFPLTLTNNHNCRDPSIILYNDYYY  
LFSTSSQLSYWRASNLSGPWHPAGSVLPRSTGSDVKGDPRQPWAPTILLVNDTFYCFYC  
VSTINTRDSSIGVATSTSLDDGGAGTWDH GALINTVSGANADVFPYNDNSNAIDPSIIVDP  
VGN SGQAWLTFGSYWTDIWQVPLSADLLSVENADDPNATQLAFNASFPAAEASFMSYK  
APWYYLWYSKGYCCGLDIDNLPAAGTEYSIQVGRSLDVSGPYLDKDNVSLAEGGGSIV  
YGSNHGQVYAPGSSGVISSDTRQDVLYYHYLNL SIGVSDGDAILGYNLYDYDDGWV  
VSSIRPDTTNVQDRKSAASNFLSMKIFLFLCMALCTLWLL

>2061\_t gene=2061\_g

MRRGVIIFILVNVLILGFLVRSVFTLLTLLVEDASADAIHRSDIPSPNSSLIETRPQLIPKIIHQ  
TYINESIPERWIEPQRSCIDLHPDYEYKLTWNAKSRAFIAEYWPFLDFTDGYKYPIQRAD  
AIRYFVLAHYGGIYLDLDDGCQRRLDPLLAYPAWVRRTKPTGISNDAMGSIPQHNFFLK  
TMESLQAYDRHWFLPYITVMYSTGPLFSLVIWKEYMPQSFMDRVRVLMPEYNGYP  
WSFFTHNIGNSWHGADAQLIFWMCRYWVLLTVAGFTIAGCVGFCMVVYGRLLLLGH  
RYRYTRVASSLSMPKIRRRPFTIVPSFFRRISASSISSDEELGRKEGAYSE

>2080\_t gene=2080\_g

MSEPTYDYIIIGGGIAGCTLASRLHERNDSIKILLIEAGPDVANHPLTQSPLACFGAHFSPL  
DWAFTVPQAHLNRECYNSAARALGGGSAINYGTWTRGSAADYNRWGELLKDQQW

SYEGLLPYFRKTETHFKTTDADLTVHGVVEGPIHNVSVSQSSPDRKYPLREPLRVAWNRL  
GVEVTEDANAGVPLGLGELTENWRDGRRQIASEVFGIKQLPRLTVLTETLVQRVLIEDDE  
SGTKRAVGVVEVIGGHVYRANKEVIVSAGTYRTPQVLMMSGIGAREDLSKHGITQTVDVP  
EVGRNFHDHFAFVQWWKLRHPERGLSIGTPLWNSPAYAVGLPCDWVATLRAPRENLR  
ALEEDKVTDIDGHPYLAPDACHLETLIVYAPAGAAVSKVDVPMGTYIASAVLGMATTS  
RGHITLASANASAPPLIDPNYYSTEFDRVLRAIRQVTGLLLDTPEGQELVESQLSSHG  
FGPLNSWSTDEEIDAQVRAGGNTFYHPAGSAAMGKVVDNSNLRVYGVANLRVVDASVL  
LPITAHYQALTYALAEKAADIYS

>2085\_t gene=2085\_g

MASFLKLAAAGLLIASASAVPTKQVRSTSVQKRSSSKAGAAYNDAASLVTTLCGDSSGIS  
WAYNWGSSSDGDLPSGVEYVPMLWGTSSLFVDGWTSNVEAALAGGSSYIMGFNEPDL  
ASQANLAASDAATYYKQYLTPYSGKAKLVSPAVTSSASTTAGLAWFESFISECTDCGVS  
VLAVHWYGDVSELQSFITEAISTASNHGISEVWLTEWALSADEGGITDLATAASFVQEA  
GAWLDEQAALTRYSYFYVANGYLLTDGAVNSVGAAYASAASSSTSSSSSSSSSSSSSS  
TTSTTSTSIYVAPTTTSSSTSTSIYVPPTTTTAAAVPTVDTNNNVAGTTPEAGAAQAVT  
TTAAATSTTPVVLTTTTVTIKSTVTVTTGCVPTPPPCCESSYVTPSSGFVTQTAVPSAV

>2112\_t gene=2112\_g

MVAFSSLVTVFTAIVGSLAAPADLFKNDNILDIVGRGPSNFIVDTNNTSLTRRSAINYDQ  
DYKTGGTVNYYSSSTGFEVTWDTEDDFVVGWVWNPSTTPINFGGEFSVSSGTGLLSVY  
GWSTSPLVEYYIIEDYASPPSFGTEKGLTSDGGTYVIWENTRVNEPSIQGTSTFNQYISV  
RQSPRTEGTVTVQNHFNANLGLKLGTLNFQVIAVEGWGSGSASAYVNS

>2143\_t gene=2143\_g

MFSTKKHLLLSAFLAASTVQGHMIMTSPQPFQDNLNNSPLAGDGSDFPCKLRSDTYSY  
TADVLSANTYHVGDSPLLSFKGGATHGGGSCQISLTTDLTPTKDSTWVFIHSIEGGCPTN  
AAGNIGDDANAPDPTTFNFTVPDIAAGRYTLAWTWFNRIGNREMYMNCAPVEILSKAGS  
KKREEETSVSKRADFPPEMFVANINGCTTTEDDFDIRFPNPGDSVVYLGEATNLLPSGQAAC  
TGGAGATATGVIAAPTPTGTGAASGTSGGTSGGSSGASTGSSTTAAAAATLTTTTATST  
VPENTVQVPAPTSTEPATSVATSTSTSTPSTGSSSGSTSGALSGPCSTEGMWNCIDGTF  
QRCASGAWSAAPVAAGTKCNAGQSSNLNLVAAKREYAGHIHRRRLLIDKAQS

>2166\_t gene=2166\_g

MRFSQFFAGITLSTSIAAATTNNYSTWMADSIIRGQGIAPETPTASTYLQIGIVQNALLQL  
IQSPKVSRAKEKYRAYVQGGTESILDRLNASQDTLYPLDRFSLGRGLLAEYLDDQDK  
QNVKEGLDALNESIALQPRNQYGGWYFYPNWSYLDGMYSYASFASLYTTHFDLRST  
LEASHDVVYQLDLLWSHCLDNTTGLLFHGYDSSKTAVWANPITGASPIVWGRAMGWY  
FMALVNWLEANSSLQLNSSQWRHVQSRFVSLADALVKAADPVSGAWWQVLNYPGRE  
GNYIESSGSAMFVYGLYKGVRLDFLPQNQVYRKVADKAYAYLADTFVVNNYNGTLGW  
NGTVSVC SLNSTANYEA

>2180\_t gene=2180\_g

MSAPRSVATALRRTRLSSRCRFAPQTLIAPISVNAARSFSITANNRADASRKIKLTAASYP  
QLKRPNPFAEVTKEHVQYFKELLGTDSALIDGVNSDATDDLAAFNSDWMRKYGGQTRL  
VLKQPTEEVSKILKYCNENRLAVVPQGGNTGLVGGSPVFDEIVINTARLNKIRSFDEES  
GVLVADAGVILEVADAHVGEKGYLFPLDLGAKGSCHIGGNVATNAGGLRLLRYGSLHG  
NVLGLEAVLPDGTIIDSLSLTKNNTGYDFKQLFIGAEGTIGIVTGVSI LCPTRAKAVNVA  
YFGLESFDQVRKAFREAKGQLSEILSAFELMDGRSQALVKESTGNKPPLEGEYPPFYCLIE

TSGSNAEHD TAKLET FLEHVLGEGIVADGVLAQDETQIQSLWRWREGITESLSHLGGTY  
KYDVSIPPELYQLVEDTNTRLTEKGLVGDDDSFPVRAVVGYGHMGDSNLHLNVAVRQ  
YTKEVEQAIEPWVYEWIAKRNGSISAEHGLGVAKKEFIGYSQNETNIKLMKQLKNLYDP  
NGIMNPYKYI

>2198\_t gene=2198\_g

MAYQQSQYPKSDAPPYADNIVLNSGINNYPARSSQYSRFDPRGWRTRTQLIAAGGVV  
VILIAIIVGAYEGVKANRYPDYSALSYSCLKDTYPEGENFFDNFWYWSADPTGGFVVYLQ  
RANAVWSNLTYATNESAVIKVDTSYSDTTGGRNSIRIQSNNTYNDGLFIFDILHTPYGCG  
TWPALWLSDSNWPNTNGEIDVMEATNNGTWGNSMTLHTTDSCSMGVKRKETGTVTSK  
NCYNGTNSNEGCGVSSTTASYGPEFNSNGGGVYATELRDAGIRIWWWPRASIPSDITNG  
SPDPSTWGEAAADFPSTDCSISSHFRNQSIANIDLCSLAAADKYYIEEAHCPSNCTAYV  
AANPSAFTEAYWEFKSFKVYQSS

>2212\_t gene=2212\_g

MSSRFTAAALLLALRSANALVLPDENVGRPALGWNSWNAYGCDVNETKILTAATQLNT  
SGLQALGYKYVNIDDCWSVKSGRDNVTNRIIPNPDTPNGINGTAQQVHDLGLKIGIYSS  
AGYETCAGYPASLGHETTDAQTFAEWGIDYLYKYNPCNYPQWDDEYNACIPDSYDYPGV  
NPNGTCPGLADPAPAGYDWSTSNNTTKRFNIMRDALVAVQDQRVILYSLCEWGYADVPS  
WNGTGNWRVTGDINATWDRITAIANMNAHELSSVDFWGHNDPDMLEVGNGLTIE  
ENRAHFALWAIMKSPLIIGTDLSTLPDTHLSILKNADLIAFNQDPVIGKPALPYKQGYNNG  
TYNPHYPPEYWSGATSYGWNLVLLFNSEDVAASRTAVWSEIPQLGKHTNRYRVEDAWT  
GKDLGCVHKEYTAQLEAHDVAVLKVTGTC

>2216\_t gene=2216\_g

MAMTFTEDSIKELRLREDAVVKCSERCLYQSAKWAAEMLNSLVTTDGNDDAESPME  
TDPQPNVNPFPSPQSDPTEATLELQEAHKYLLAKSYFDTREYDRCAA VFLPPTIPPVPLSTV  
SPNVKSRTSLTPQKGRKSFVRPGSKAGQALPRNPYPNLSQKSLFLALYAKYLAGEKRR  
DEETEMVLGPADGGMTANRELPDLARGLEGWFAERRERGLQDCGQGWLEYLYAVILM  
KKGNEEEAKKWLVRSVHLFPFHGWAWQELSDLLPSVDDLKQIAETLPQNIMSIFQVHC  
SQELYQATDETHQTLNGLESIFPTSFLKTERALLYHRSRDFEDASAIFADILIDSPHRLDS  
LDHYSNLYVMGARPQLAFVAQLATATDKFRPETCCVVGNYYSLKSEHEKAVMYFRRA  
LTLDRNFLSAWTLMGHEYIEMKNTHAAIESYRRAVDVNRKDYRAWYGLGQAYEVLDM  
CFYALYYYQRTAALKPYDPKMWQAVGTGYAKMKNIPQSIKAMKRALVAGAYYEQSA  
DASSADHPTAGRKILDPDLLHQIALLYERSGNEDEAAAYMELTLQQESGEIERTETDSED  
DDGDENSDDDDTTTQPRSRRRRRRQKSSRDDDNEVEAIGGTGVTATTSKARLWLARWAL  
KHGDLKRADQLAGELCQDGIEVEEAKALMRDVRARREGGG

>2218\_t gene=2218\_g

MTLSKTYAILASVSLWLGANAQGRGLCYGNVTWANYFAGNSKVTWGYNWGVQSGG  
LDSSLEYVPMLWSVPSGADPDFENAAAVAKNVLYGNEPDLGSQANTIPSVAAAGYQTY  
MQPLAGKTRIGAPAVTNAGNGVLAYMGLGWLEYFFDDCQGCHVDFIPLHWYANDTAA  
NFEAYLTQAHDRFQKPIWVTEFQLQSDANQVAFLQEVLPWMDQQSWIERYAYFGPFE  
TFLINGAGNGLSDVGKAYVSI

>2224\_t gene=2224\_g

MASTNGSGTPRRDTRNHLLFEIATEVANRVGGIYSVLKSKAPVTTAEYGERYTLIGPWN  
RASAAVEVEAMEPTNQAMIDTMASMKERGIEMIYGRWLIEGAPRVLLIDTGTGYGLN  
EWKGDWLNTSGIPSEGDHETNEAIVFGYLVAVFLGEYIAHESKRAVIAHFHEWLAGVA

LPLTKKRHMDLTTIFTHATLLGRYLCAGSVDFYNNLQYFDVDAEAGKRGYHRYCIER  
AAAHSADVFTTVSHITAFESEHLLKRKPDGVLNGLNVKFKFSAMHEFQNLHSQAKEKIH  
DFVRGHFYGHMDFDLNLTLYLFTAGRYEYRNKGVDMFVESLARLNHRLKTSKSTTV  
VAFIIMPAQTSSLTVEALKGQAVVKSRLDRLTLEMVEKGIGRRLFERCLSWKEGDSLDEK  
DLITSQDRVLLRRRLFALKRHTLPPIVTHNMVNDESDPVLNQLRRVQLFNHPSDRVKVV  
FHPEFLNSANPVLPLDYDDFVRGTHMGIFPSYEPWGYTPAECTVMGVPSITNLSGFGC  
YMEELIENSSDYGIHIVDRRAKGIDESVNQLCDFMFEFASKSRRQRINQRNTERLSDLLD  
WKRMGLEVVKARQLALRRAYPTSFDTEEDFSYIGSTAQKISRPLSVPGPSRDRSGMMT  
PGDFASLQEGREGLSTEDYIAWKLPEEDEFPPYPLTLRTKKPGDRPQSPLDSISLNGK

>2235\_t gene=2235\_g

MEKFLRGWRQDALNRGQNSAIYIGDKVLALTNSDADAFWLAQVHFNNNNFTRALAL  
LSRKDLISRSTSCXYLAHCYIKQNKFEAALNILGDQNPHTLITTAGHSRRKIQLNGHSH  
VTLRNGKTAASRSDRADRSEERDREDANNIRFEAAMCYLRGLCYAKQNAFDRARDICYK  
DAVRIDIQCFAFDQLMKNSLMSPAEELFLESDFDSVTVPSDPSKSQEAHFVKMLYT  
TRLISKYTPATLSDATETLSTHYNLATNPDILLSRAEALYTQCRFLEALELTSSILTSPETA  
GAMTESSVVPQNLGHSPA VYPLHLACL YETGAVNALFLLSHTLADNAPEEPYTYLAIG  
VYYLSVAKIAEARRFFSKASLLDPHSAPAWIGFAHTFAAEGEHDQAI AAYSTAARLFQGS  
HLPQLFLGMQHLALNNMSLAHEYLCAAYSMSGSPSGSLTTIPKGPASGLPALGGDPLV  
LNELGVVLYHQGNFKPAAELFHQALALANSLQCDPGAWVATRANLGHAYRRMGELND  
ALAQFDECIRVGAGGGATGYSAAIGGTSATSAGVAGYEDRGLIGSLHTSRGLVYLQLGR  
TLDAVTVLHEAVRVLGVSGGDAAGGAGTAGTILARALELWSMENRVKAIKTANSRQ  
RRDAASRSRDDAYGSNLTEELVHAEDDLETELDAHAEGLLGTALNKVRPRRPGKRPQR  
SGTASASVDPPEEMEVEEPIGRSSRGNEASLPSRRSPTRRVQTRRPDGS

>2239\_t gene=2239\_g

MFSSTTAFVAATLAVGVLANPAAAPAALTKRNTPNSSGTNNGFFYQFWDGSSGTTTY  
TNGPAGEYSVNWQNVGDFTSKGKQWQAEARNISFSGSVNCGNFYLA VYTWSTQGEN  
YILEDYGTYNPCSSGTNMGSLSYSDGSEYQVCLVDRGNLYLQNW SIRQNKRSSGTVTTA  
NHYNYYEAHGMTHNPLSSAAYQIVSTEGYGSSGSADITVSEASPTSSSTGITSSTSLTTG  
TTSSASPTSSSTSGTGAHWGQCGGIGWSGPTTCVSPYTCQQINPYYYQCL

>2241\_t gene=2241\_g

MAIARPIRLGAVGILGVLLVLYRLSQTSQLPSITGTTGTVDTKITDGMKRDPLLDPTGE  
PEGILWRAEDHDYAPDSENSARINATLLSLVRNEELSELVTTMKQLERTWNHKNYPWT  
FLNDKPFTEEFKRKTQEVTKARCYEQIPADHWEAPEWIDDDL VRESNKLLEEQGLQYA  
GKASYHKMCRWNSGMFYKHPALANTRYWRVEPKVEFYCDVDYDVFHYMQDHNT  
YGFTINLFDAPESLPSLWPETERFLAEHPEYIADNNMEWLVDKLRPEHNKANGYST  
CHFWSNFEIGDMNFRSEAYEAYFNHLDRAGGFFYERWGDAPVHSVALGLFEDASKIH  
WFRDIGYRHIPYFNCPNSPKCSGCTPGKFYEGASFLAKEDCRPNYFKYVGTG

>2248\_t gene=2248\_g

MSGFSRTRQKRYKAAKNLEIMILASILLFATSVAAL TLDVASSGGNKSSSLLYGLLYEDI  
YHSGDGGLYGEMLRNRAFQSSSNGAASLARNTDYWHPVGNVSLNIDTSSPTLSSSLPY  
QMRMDVPAGTTGTGVGFYNEGFWGFNV DATKRYIASFYMRGNNGTVDCYFHSNTTGQ  
VLGSSMSIDQISSEGWVQTFSTTFQPTTGSDANNTFYFTFDGSKLAGQSIYFNILSLFKK  
TFDDRYNGVREDLAKAVENMNVKYIRLPGGNMMEGNGSPYEWKWN ETIGSLVDRPGR  
PGTWGDINTDGFGLLEMMQMSQDLGLEVILGIWAGLYLDGEIISEANLQPYVNSVMNEL

EFLLGDKSTTYGAQRAALGFSPFTINWIEIGNEDYLNNGTSSYYSYRFMAFYNAIHAVY  
PSINLVSTINPNPVTSNGSSLDLHIYGNEDYFVSLFNTFDQASREYPVFSGAQTLGMSCAE  
AIFLLGCERNSDVIVGSAYGALIKSYNEAPDTVAVIKHTANEILYSISYYVQKLFADNMG  
TKTLPVTATNGGFGPVYWSATANSSSTILKLVNYDGMTGSSNAVVRVKIEGSSKKTATLIT  
LTAPNSTSVNNLPTLGGESSTITTTLSGSSGSFSVSFSNPNYEIAILVV

>2249\_t gene=2249\_g

MAEITALRFEQHHSGLGLQCSSPRISWTFSAADDSICDWQQLQYEICVRHETGIPTYFVIQ  
SPGSSLVPWPSTPLQSREQAQRVVRVCGSWMDRKTRRVHSDWSAWSSWATVECGLSS  
QDWTAVPISRPIVPLSHKDEPLRPLLFRKTFELPATFDSVQRARLYITAFGVYRAYLNGCR  
VGDHEMSPGWTSYRYRIAYQVFDVKSLITTKGNNVLSFEVAEGWYAGRLGFDGGKRYI  
YGDQIAVMAQLEIDGPAGGRFKVASDISWKCHPSPIVNSEIYNGETYDARVEGEYWNQH  
DPSNVDTDWETVSVLDFPRAQLYAPNAPPARITEILAPQKIFTTPSGRIILDGQNLVGKL  
LVRSITLPVDATEVFSIHAEVIEDDGELGTRPLRGAKCVDTVISSGQTLIDWSPKFTFHGFRF  
VEIDGWDPRIEKKSWSNIQALVIHTDFRKTGQFECSNMAINQLHQACWSMRGNFLSI  
PTDCPQRDERLGGWTGDIQIFGPSATFLYDVTGMLSEWMEDVACEQSDHNGVPPLVVPN  
VLDHVWPSIPQALWGDVVIILPWVLYLSSGDCEILRRQYPSMNSWLDQGVCRGKDGLW  
DPELWQLGDWLDPQAPPDEPGDCRTNSTLVADAYLVYVTSLMAKIAFVLEKESESAHY  
SYKAQCLRALFQEKYITSSGLMVGDSQTAYSLAIVFGLFSTQLQLDTARRQLAARVRMA  
KFRVSTGFAFTPVILKALTETNNLSLAYRMLLEDRCPSWLYPISMGATTIWERWDSMLP  
NGSINPGQMTSFNHYALGSVVNWLHETVGGRLALEAGWKTALVSPQPGGSLTYASVSY  
ESVYGRWSCFWKLRFDGDRNETVTLCLDLVPPNCRAVVRVQADEGGFSKLNENVGS  
GKHHWEIPFFPWPPQATAPFITNPGKHID

>2251\_t gene=2251\_g

MRSHALAPFAFELLPLGSVQPRGWIRDQLKCAAGLGGNLYNFHRFVKDTSWLGGDVE  
YSPLRESAPYWYNYIVPLAYILDDDDLKQANEFLHRTLKNQHADGWIGPEHTKHGRGI  
WARCLVMMGMVNHALADPSQYDRIVDSLRFTRLINSMLKDNYQGLIPHPGDEFDEFICI  
TRAHELSTSLQWLVEQVNNRRDKEMIWETMDLAWEATRVDGDRDWSKFFTEEEFPKPP  
AAPGSTLIKHVVNVSEALRYMPQLYRMTHDELIAKTRRSVDMSFKYHGTTFGALAGD  
EFLAGVHPKRGAEELCGTAELIFSLSYMYRFLFGDNSYADRAELATFNGLPAGMTPDWWA  
HNYLTQSNPWARLENWPFYNCGGRALVYGLEVNYPCCLVNHSQAMPKFAMNAFV  
ASADLRSISHQFLVPAEVIVPVKGEKPIHIVSETHYPFDERITYKIETSRPFNFYIRVPEWAT  
KGTTVNTLDSDEVREEAVEVDTNSLYKIAISPGKTAFRITLNAEIRVVPRANNAVAIYR  
GALLYAMEIPHKAKVGPPTHFAEWKPLPDADYSSKLRDVEYIPTADWQVAIDPSQTHFH  
RSEVKGDLNPNIFESGAPPVSISVAGTKISNWKLEGDCAGLPPADPSPTGKPFTVKLVVFA  
SAKLHISEFPVVHLKKVTLESQRSGHCILM

>2274\_t gene=2274\_g

MTTPRKVCFTIGATAPFDALLSNVLAQPFLDTLKHGYTALLIQYGKEGQAIFDAFTKI  
NPPGSPGRCDLDIKGFGKNEGLVQEMRSTKANPSQNVVEGMILSHAGSGSIMEALRIGV  
PLVVVNPALQDNHQEELARQIAKNGWAVAGKLDRLVESVQKAETLRNALRSWPPKNS  
GAFKDSRGLAGVVEDELGFLD

>2292\_t gene=2292\_g

MTSQRERLERAISASDPFSEPEVYYGEPNALDGPDGHRHRRFTFSADLRSVNRDDIKEFLG  
KLPARRGSHDESTLASRKFLIDVDKTIASLLEREDTDQNMEITIEDVGPKVLPVGTAAASQ  
GYNKFDVRGTYMLSNLLQELTIAREYGRKRIVLDEQRLENPVSRLSRFIKKTFWNALTR

RIDGSNIAVAGLDPKDWTDGPRPRIYVPPGAPEQLEYTRIAKENPEMGLDVQKLEGPIT  
PEYVKSLNAKPGLLALAMEKFIKEDLRGVVFPVPGGRFNELYGWDSYMESLGLL  
VSDRIDLAKGMVINFCFSIKHYGKILNANRSYYLTRSQPPFLTDMALRVYDKIKQEPDAL  
EFLRMATLAAIKEYYSVWTAEPYDPATGLSRYRPEGLGVPPETEASHFLHLLTPYAEK  
HGLSFTEFVAAYNDGVITEPDLDEYFLHRAVRESGHDTSYRLERICANLATVDLNSLLY  
KYEVDISRIVRTYFKDKLAIPSEFRTPQTAHVEFETSSVWDRRARKRKVTMDKLMWNEE  
KGMFFDYDVTVKKHCIQYESATTFWTMWAGLATPEQASKLVRQALPRLEEAGGLASGTE  
ESRGEISLDRPNRQWDYPFGWAPQQLAWTGLLRYGYQDDAERLAYKWLYMITKAFV  
DFNGIVVEKYDVTTRPIDPHRVEAEYGNQGSSTGFGWVNASYVYGLDILNAHQRRALG  
AVTPYETFSKAVDQQFPY

>2306\_t gene=2306\_g

MIFAVSNALFAASSLLLLAPSPVNAITYNASTHVDCYSSLPSNFIDNGTWTYQSSGYCQE  
RCVPMGY SVMAMTNGDCWCGNELPANSTKTDCTDTCDGWQADACGGKNAYDVY  
LTGLKSDVPIADSSSSTTTSSATTSTTAGVTVITQAGQTI VVTASSDASATAKSSGGTST  
AGIAAGVVGVIALAAIVGAAVFFLRRRQKQRV EEEYRRNAEISAFTQKKPSSMSSDAR  
WSDSFMAQRRQSNQSIADAGDFSRRILQVTNPDR

>2335\_t gene=2335\_g

MPRSRRYRSFVIFTVIFGLALLHFVRSREWSSEWTQPAANPKVAPATSPHDSTPHEPILPH  
DRDAAAEIKFDSTPRIEVPPVPKEQPLDTKKPWTQETAKQIPNGEKS KSGTIKPPTRPASD  
DTISIDTASVVDSRESSGDKTTKPGSPAKVQPDVFAETKPTKHWEKLEPHPILESDLIP  
LPSGEPKLPKFQSVTKTETTAQSILREQLAAIKEEFEHAWSGYTEYALGHDEV RPVSG  
SFRDPFAGWGATLVDALDTLWIMGMKDEFSDAVEEVSKIDFTTSFRSDIPLFETVIRYLG  
GLIGAYDVSGQKHTVLLDKAVELAEILMGAFDTPNRMPVTYYQWDPEHVAQPHRASAR  
VVLAELGSLSLEFTRLAQLTQEHKYYDAIARITNELEIMQNSTR LPGMWPLQVDASGCK  
KATPSVPSLTTLGQKSGVKANEDRGLGTPSPTPKSTHKDSAIPKDLEKREGGLELDAE  
PADHESETKTTTTAKFTPPKKEECEEQGLTSSNAKYDRFGLGGQSDSTYEYLPKEYMLLG  
GLSEQYRTMYEISMPEVRETLFRPMLPEQRDIRFVATVQVSDPGPKDDADEFHQYTYE  
GTHLTCFAGGMFAVGAKLFGIDEDMDIAAKLTDGCVWAYESTNTGIMPEGFELLACDD  
PLVCPWNETRYLDVMDPNEKSRIQQAEAWYERELQNAKQAQEV SLEKKPKIVSPVRVL  
ESESGASSEKTYAGIARREASNSGVDDYDEHAHLSTSKPSVEKASVGTQDTPKSRLDSK  
VSPDTKYQADGLPIKPTVLSHKDYVANRLEQDHIPLGYTKIQSRKYILRPEAIESVFIMYR  
LTGDDTWREKGWKMFSIARYCRTELADSAISDVTSTSPELLDEMESFWLAETLKYFYL  
LFSDPSSVSLDDYVLNTEAHPFKRPVS

>2337\_t gene=2337\_g

MKYGVLGIAALALLHFTNGHDHHRQLSKRALRQPAADQPCPKETLTKTVVVQLDQA  
GHTVDVQVQSTQPSTTARFSDAASGHREVPTSSTTSATTTATPKSAQSDRYVIPKPSALN  
NLPDPLSSNFLSDTSSSTFLGQRSNYGISYSPYKADSTCKTQDEVNDDIRQLRQFSFVRFYG  
IDCNQAETVTHAARQNDMQVFAGLYNIDDIETDLQKIIDAADGDWSTFHTV SIGNALVN  
RGSKTPEVVGTVISARRILRQAGYEGPVVTVDTFNQIIAHP ELCDESDYCAANCHAFD  
SNQTPENAGPYVLEQARHVYQATGGNKQVIITETGWPSAGEANGH AVPSRQNQLKALK  
SLRQSPDGGGIVFFSAFDDKWKQDTPWTFGTERHWGLYGLTETASGFPDLIGPLNDEV

>2339\_t gene=2339\_g

MSAGHYDDGYGHQGHGDAYYQDDQHGYDQNEYSNYGDGYDQSGYYGDNHGEH  
HGEQHGEQHAGSGYYEGGQDNYYNEQYYDQGQGGHPDYAQNGRGRRRRDSEEDSES

FSDFTMRSETARAADMYYGRGDERYNSYNESQMGGQGYGYRPPSSQISYGGNRSSGA  
STPVYGM DYSNALPAGQRSREPYPAWTSDAQIPLSKEEIEDIFLDLVNKFQGRDSMRN  
MYDHFMTLLDSRASRMTPNQALLSLHADYIGGDNANYRRWYFAAHLDDAVGFAN  
MQLGKASRRTRKARKAAKKA AVENPENEQATLDALEGDNSLEAAEFRWKTRMNRMS  
QHERCRQIALYLLCWGEANQVRFTPECLCFIFKCADDYLN SPACQNRVEPVEEGTYLNNI  
ITPLYSYLRDQGYEYIDGKYVRRERDHAQIIGYDDVNQLFWYPEGIERIILEDKTRLVDIA  
PAERWEKLDVNWKKVFFKTYRETRSWFHMITNFNRIWVIHLGAFWFFTAYNAKSLYT  
KDYQQQLNNQPPGSYSWSAVGLAGALVTLINIFATLAEWAYVPRRWAGAHLTRRLLF  
LLL VFAVNIGPAIYVFGVSKDGTDTIAYVLGVVQFFIALASFFFAVMPLGGFLGFSYMKK  
NTRQYVASQFTTASFALSGNGMWMSYGMWVCVFAAKLVESYFFLTL SFKDP RILRPM  
KIQNCLGDKIIGDILCHAQPQILLGLMFFTDLTLFFLDSYLWYIILNTVFSVARSFHLG VSI  
WSPWRNIFSRLPKRIYSKVLATTDMEIKYKPKVLISQVWNAIVISMYREHLLAIDHVQKL  
LYHQVPSEQEGKRTL RAPTFFVSQEDHSFRTEFFPSQSEAERRISFFAQSLSTPIPEPLPVDN  
MPTFTVLIPHYSEKILLSREIIREDEPYSRVTLLEYLQKLPHEWDCFVKDKILADETSQ  
FNGEYEKSEKDAARSKIDDLPFYCIGFKSAAPEYTLRTRI WASLRTQTL YRTISGFMNYSR  
AIKLLYRVENPEVVQMFGGNSDKLERELERMARRKFKICVSMQRYAKFNKEERENTEFL  
LRAYPDLQIAYLDEPPANEGEEPRLYSALIDGHSEILENGLRKP KFRIQLSGNPILGDGKS  
DNQNH SIIFYRGEYIQLIDANQDNYLEECKIRSVLAEFEELTTDNVSPYTPGVSTPKTDP  
VAILGAREYIFSENIGILDVAAGKEQTFGTLFARTLAEIGGK LHYGHPDFLNGIFMTTRG  
GVSKAQKGLHLNEDIYIGMNAVL RGGRIKHCEYFQCGKGRDQGF GSILNFTTKIGTGMG  
EQMLSREYYLGTQLPLDRFLSFYYAHPGFHINNMFIMLSVNMFMITMINLGALRHETIL  
CRYNSNLPTDPLMPTGCANLVPITNWNRCIVSIFIVFFISFVPLVVQELTERGVWRAAT  
RLAKQFGSL SFMFEVFCQIYANAIQQDLSYGGARYIGTGRGFATARIPFGVLYSRFAGP  
SIYLGARCLLMLLFATATMWTAALIWFVWSLMALCISPFLFNPHQFSWNDF FIDYRDYL  
RWLSRGNRSRSHNSSWIAFCRLSRTRITGYKRKVLGVPSEKLSGDVPRARITNIFSEILGPL  
VLVAVTLVPYLINARTGVTQNNPQATNALIRIGIVALAPIGVNAGVAGAMFGMACCM  
GPLFSMCKKFGSVLAAIAHGIAVIMLLAIFEVMFFLENWSFPRCVLGMISMAAIQRVY  
KLIIALAL TREFKHDQSNIAWWTGK WYNMGWHSLSQPGREFLCKITELGYFAGDFVLG  
HLLL FAMPLSLCVPYIDRFHSVILFWLRPSRQIRPPYSLKQSKLRRRR VIRYAILYFVMLV  
LFIVLVVAPLVVRRNLNIKLP TIPDSLMQPLDAGSAHNDHTHTYTG SGLPAGFIAHSGSDSS  
SSTSTAGAKMFMF

>2355\_t gene=2355\_g

MYFSKSILLPLLLAVGSLAGEDVCPAGADEVVVVETITETYSIPAHPSSTVVSSVAPVAAV  
ESTTSRTPAASSTQATWTTVGLLTSTTPVSTVQPISSTTTTSASTVPTSETFVGLTRYGD  
DCTEEDCWQGGACSFVDYTL PAGIDGSTCVSQDIWNNGANCGGCISV TYKGTITVMV  
TNETGGNATHLDMTPATWSKL TNGYSGGGVDGIEWEWITCPIATTTPLEIRMHG GASKY  
WFAATVENARLRTAKLEVSSDSGATWKA AVLENYNMWILDGTL PNDTAWVKVTSIDG  
DQVVVENVALQSGVITQATENY

>2361\_t gene=2361\_g

MSLRGAVRTASSYL RKT FAPQKNIIRIQALS LTQWPTADFRSRRWTQSAAAARQQPD  
SSNPAMSFCLDAQEAKTVSLSTRSMNTGPEPSYTTGHHEKFHCEKPLLLDWGGVLHEF  
DVAYETWGT LNADKSNAILLHTGLSASSHAHSTPSNPKNGWWEKFIGPGAPLDTNKYY  
VICTNVIGGCYGSTGPSSIDPSDSKRYATRFPILTIEDMVRAQFQLLDFLGIQKLHASVGSS  
MGGMLSLAAGVLFPERMGRLVSISGCARSHPHYSIAMRHTQRQVLMMDPNWQRGFYYD



SIPPHHGKMLAREIATVTYRSGPEWEQRFGRKRADPSKQPALCPDFLIETYLDHAGEKFC  
LEYDANSLLYVSKAMDLFDLGHAHQVATRERREQNQKSMALGNIERNNDASCSLTLDPK  
PYEEQPAALSSLTSMNEPATVESTDGPPQDLVRGMSSSLKDHPVLMGVASDILFPAWQQ  
REIADTLRAAGNQKVEHFELGEDVSLFGHDTFLLDLENIGGRVVGKFLG

>2362\_t gene=2362\_g

MAPIRRAIVAFVLLVGFILLFRSFSASDAVYREDSPOGQKPLRIPPQARGRVVVTWQSQT  
VGDAAYPSLLEKLRYQYPYDLDSKFPAYIWQTKHVSVDGSGFPNHLRSLEASWTSQNPE  
FVHEVISDESADHLIQYLYGAVPEVVEAYNSLPAPVLKADLFRYLILLARGGIYSIDIDEA  
LKPAIDWLPDDMDPSSVGLVIGIEADPDRPDWHQWYSRRIQFCQWTIQAKPGHPVLRDV  
VATIVEDTLRMKKKGVLTMSKMDKSIVEFTGPAVWTDVFRYFNNPDYFLSEGTRNVT  
YEDFTRLTRQKKIGDVAVLPITSFSPGVGMGAQGPDDPLAFVSHQFEGSWKPENERIY

>2382\_t gene=2382\_g

MGGAKQVYLLPLTDGGAPDIPGGYIYLPPPTTPAYVLRVIEGTSSICREGSLWTNIPEEG  
AEFDRSKFRQFSLQPDFNFKDIHIDVPINQAGAFAYTTYSPLPEFTASSLPSQKQEKSEVH  
YVDVSPALSQGADLPLDALSIFSVISKFMGKYPTDWDShLRGISQRNYNMIHFTPLMQR  
GSSNSPYSIYDQMDFSNVFPNGEKDVAELVDKMSKEYGLLALTDVWVWHTANNKW  
LEEHPAAGYNVETAPWLEAALELDTALLNYGNDLEKGLPTEFHTVDDLLKVTGMRK  
HVIDAIKLWEFVVDVKENVARILKEWTTSPSTEPIEGAQSWTLKQKADFIRQSALPNAS  
RILGRFDRQVDEKEASRLLTALYGSKDTADSSAVESEIGHILDEVNQPFYEEYDADV KVI  
LDQLLNRIKYVRIDDHGPKLGPVTKSSALIETYFTRLPANETTKRHNPKSLALVNNGWIW  
NADAMKDNAGPDSRAYLRREVIVWGDCVKLRYGSSPDDNPFLWEYMAKYTRLMAYK  
FSGFRVDNCHSTPLPVAEYLLDEARKVRPNLTVFAELFTGSEETDYVFKRLGLSALIRE  
AMQAWSTAELSRLVHRHGGRPIGSFELDPTGSSPASNEQEIIASIRQSPVHALFMDCTHD  
NEVPAQKRDARDTLNAAALVAMCASATGSVMGYDEIYPKLIDLVSETRLYTSKSESAT  
LEVGPGEKGIGIKLLNELHTKMGKEGYDETYIHHDGEYITVHRVHPKTRKGIFLIAHT  
AFPGYGNNGILAPHTFTGTHAKPLGSKLEVDVSDSRKSVLEDQKFLRGLPSKVIKIE  
GATVSINGEDADVTVTEHLVPGSIALFETWTPSAEHADGFDHYITSGADEAFKLDLIDL  
NFLLYKCEAEERDSSNGQDGVYSIPNHGPLVYAGLQGWWSVLENIIRYNELGHPLCDHL  
RQGQWALDYIVGRLERASKQELYTRLEPAAWLRTRFDVVRTLPSFLLPRYFAIIVQSAF  
TAAWRRGIQLFSKNVQHGQQFIHQLAMVSVQQVGYVKSASLWPNKSVPSLAAGLPHFA  
VDWARCWGRDVFISLRGLLLCTGRFEEAKEHIIGFASVLKHGMIPNLLSSGKLPRYNSRD  
SVWFFLQAIQDYTKMAPDGKILDAKVP RRFLPYDDTWFPHDDPRAYSQSSTIREVIQEV  
FQRHASGLSFREYNAGPALDVQMKPEGFQIDVNVWDWDTGIIFGGSQFNCGTWMDKMGE  
SEKAGSKGFPGTPRDGA AIEITGLCYSALKWVEELRTNGQYEHEGVSAADKKFITFAEW  
ASKIRSNFERCYYIPVNSTDDSKYDVDSSSLVNRRIYKDLKSGKPYEDYQLRANFPIAM  
TVAPELFNPEHALQCISLADSVLLGPTGVATLDPSDLNYPNYNNSDSTDFATSKGRNY  
HQGPEWLWPRGFFLRALLHFDLLRRKTAHERTETFQQVTRRLK GCKVAIKESPWKGLTE  
LTNKDGAYCADSSPTQAWSAGCLLDVYYDAAKVAS

>2415\_t gene=2415\_g

MSQEGGLLDGRFSSSSMKAMTNKSNMDEVSRRRVIIIEYLRDQLATHRWYSNPAEP  
WCGVLLRISRGVYVSEPDVNP SLLAAVQKINPEVAYTMSTRMTKLIASQLQPQSELVL  
SNGSILQVIDSLADIVTLSSAVKKYQYGALLRQEQMLLVWHDSVDKLFSSHMDLEARL  
MARVWGSSLPSSLSLHQSALPSVVTPTASLYHLPMDTKAETSETIAAVYPVDEEAAK  
HVDSLDRPLAVASSIYTALGVFTVIVLLIGFNVSSLVFESLVDGKWIRMALIVATPFLCLL

SLFFFFVIWGDIFQVVGPIKSLQVNSRFYSPHRPDLAAAYAQGFSPPRVTIQMPVYTESLE  
GVIPTVTSKLETISHYESHGGTATILVNDDGLAYLSEEEAQRRIIDFYHDNNIAWVARPKN  
NDERFNYSVRKGGKFKKASNMFALNVS NKVEDELLILMGEKLGQADMIDPIEEEIQYRRA  
LETVLASDPRIAGGDIRMGEIILIVSDTRVPKDCLLMGAAEMFLSPEVAIIQHSTGVMQ  
VTGDYFENGITYFTNLVYSSIRFAVGNGEVAPFVGHNAFLRWQAVQSVGNDDPDGYVA  
YWSESHVSEDFDMALRLQIHGNVRLASYHGADFKEGVSLTIYDELARWEKYAYGCNE  
LVFNPMYTPWPWKGPFSKLFRTFLFSNLQLSSKLTILGYISSYYALAVGFPLTVLNYFLVG  
WFLDDLDQFYMQSWKVYLSLLVIFTGAGNVALAILRYRLGEKTLGALVENFKWAPLF  
CIFFGLSFHNLALLAHMFSINMTWGTTAKEKDDSNFFKEIPKIAKSKWYAVVIPAI  
GAMIYLGCFAPHGWRINSVA VVPLASTLISHTLLPFVLNPALMVFN

>2416\_t gene=2416\_g

MVYTVQNPFTSDSNAPSIRSSYGSDRNGDSTPAKRKFVSYRLKKGFEQPWLEDKRVKKTQ  
VGNWIIRGAVIAALLAVYINYAYTRVPKTNCLILDDSFQEINPDVWNHEVQIGGFGN  
GEFEWTTTDSGNFVDESEGLHILPTLTNNTSITPAEITNGYTLNLQAGGDTCTGSTIS  
DCAVQSNSTLRVIPSVRSARLNTKGGKSIKYGKVEIVAKMPEGDWLWPAIWMMPESD  
VYGAWPASGEIDIAESRGNNDINYQQGGRNWFAS TLHWGPTVDTDAYWRSTTAKTLQRG  
DLSQGYHTYGMQWTEYIFTYLDTPLKQILYYKFPKGKTMWQIGDFASYTANKSILADP  
WIQSADSNAPFDQPFYLILNVA VGGTNGWFPDGEKNKPWTNQNSAWDFYQSLNTWFP  
TWGAGNAKGMTIKSVKMWQQGEC

>2418\_t gene=2418\_g

MSDSKTFPPVALEHDLSDPPPAYSPLIRPSHASVSEISITSRLDNESQFERDESLAKRLTLEP  
TPYALAFVERFRPNQVQVITQTTQTRVAEVTNYPPLRDRNVSLDIMVMVVGEAIDTFI  
NLSKRLVNDSHRVRVAAYARYGPLITKNGLDFWQIDQSRMNSGTFESCLANLTRQQR  
ADLQQRSTLFGTYVRCWEACISPTGNDPRPFVADAHASPLAHAHIHCADRLSIPLHIMS  
SIPCSPTEEYAHPASLAMVEASEEKLSNLLSYAMVEEATWATIIDPINHFRQHTLGLNRIH  
PDVAGRLMQEQAIPHTFFCSNELIKRPKDWSDTLQISGYPFAEHEFRNYEPSKALKNILQS  
SAHLVYFMDPHSLSDPSHFARLLSEATDDQGLCILLPSVWGDLDVDTAGHTKIFLTDGAP  
DDWIIPQVNVVVHTASIQSTALALRYGKPSVTITFNREQTGRAQKIARAGAGVMPFSPT  
LTPLSLVKAVYACLNSDIQCTLKIRKKAESKKGKGLDLAAQSFYRWIALCISPCSITEHE  
LATYQIEKPDISLSAAVASVLLQEKLKRSEIELIRQVVYDIAGEGVKAGFKNTKVYFD  
AFANAAHDIASSNLVGMIRKTPDRGGKRSVANEIGIGTAKFFGNIALLPFTSTALVV  
NTVTYGIKTA KSLSSNRPQNDDDYGSDRTYKSSSSAYSSTRLSRNVYSDEGDHNQNN  
DNTENGDNSSQVSKLANMKN DINSKQQRVSVATLQSERGFRDSRMQDTEFRRWVVEQF  
KKVQSHETVGANTFPLS

>2423\_t gene=2423\_g

MSSYYPVSHETNIHITQSGNPAGTLVLLLHGLGGSTATFVTLLPYLNIEKNRIVSVDLEGF  
GKTGLSSSDIKLSIPRYVDQLESVAFLQKPAEEDDTAATQKTLERRIIIIHSHLSGSIAMH  
YAAKHPEKIRGLALLGPGRSISHIPAARERMLSLASKARVEGISAVADVAAMSNFQSSEI  
AVPDSIRDIVRSAVATCDAEAYAKACEAVAGLDHLDPDYSRISAPTLLLAGSGDVISPPE  
RSVELKGLIGDNSWVTILQDVGHQMILQDLDRSGKAIKSLFEAVLM

>2432\_t gene=2432\_g

MIGLATLLALIGAASANTLLAELNYGSFQGYDAGYNLSYWKIPFAAPPVGENRFRGP  
QPPSQINGTYDTNSTFAACPQKLSTGSEDCLYLGVFARPWSQGEKLRPVFVEFYGGAFVE  
GSASTGLPGIVYPLLNSSDESDFIVVGPNYRTNAFGFLPGQEVHDDPKSDLNAGLLDQQY

ALEWVHKYIHHFGGDPQSQVTIIGQSAGGGSTVAQALANGGRTEPPLFQRSLSPFWPKT  
YRYNAPEAQAIYDQFTRVSNCSYKDTLGLCKTASLETLMTAAYNVTYSDEYGPSSYT  
WAPVIDGHFLRRTLTEAIKNGDINGDVHWGMYNTYEGENFIPPSLNNSDSDSSDAAFKL  
WLSDFLPGLSQHELQHLETVYPPSGSSENIESYNSTYVRAELVYRDLVLACPAYWTASIA  
ETGYLGEYTISPATHGSDTSWWDKPNVLQTEYPTIYHGFAGAYASLVQTNPNKLTN  
SSEAAVPNIRTGKEWVSMGGFSNTKIEQLKERCGFWMDVAANVPI

>2443\_t gene=2443\_g

MDKLIFYFKLRILRWLTRLALWDRKRSPALALTPSSQVSIPSTLSTSPGNFDFLYHPPG  
YDSENAKEGQYPIVLVLHGGGWCVGARHDERFIATLIARGSVVAVNYRLAPEHPYP  
APVADCLDAILYVWKSAAAMGLDKHRTYITGFSVGGQMAFASLFMLCKALQDKDPRV  
DPEIVGVRGITAFYPPMDLTKSRAERAASNPAFVALRKKPASSSKLIGDIFDRAFWNL  
QQMPDKGGPYVSPGLASLDLMQTALPNRIFLELAALDPLLVEGEAAAARLKAAGKQVD  
CTTVANVPHYWDHLAKTEHEKGLREKVYNKAVSEIEDSMEIKD

>2450\_t gene=2450\_g

MSALLKALVAAAFASSAWGSEFRVFDNTAYTNTSIGFQSTNINWIPAYVCNPLTAGGVL  
PSAAEWKSIVLEWNIYPGYPLVLDCEDLYFTSASTADLYLQILSTLQTWAAEVIPTGQIG  
WYGLSGNTIPSLYGHYQSLIANYSHAFFPSAYTFSSSLTTWNTSLNSVISNIIAINDTLPIW  
PYTWPQYHNNYSFIPVDLWESELEILSANTYLDGFVIWGGKNHAVCNDTCQQTAGQQP  
WLNATRSFLSNLYGIYNGEPQRNGAQVFSF

>2494\_t gene=2494\_g

MEPPFVPKPTTPYFSKTELQIGGLKTYIYGLDQARQEGWTDLAVLYIAHGRTRSYRDSEA  
LAHEILHQVQSDPTPKDAGLIVVTIDARNHGERKLNMDKNMGWTEGNESHAQDILSIISG  
SAHDYELLIEYLPTYLPEFNKFYNFMSGISLGGHTSWRVATSSVAQKGLHGCVIIIIGCPK  
LTSLLSRLGVDLEAAAREFSVPLDLVHTISYDKLSKILTDEQRQRWPRVAELTSLDR  
VVEQSYPKDIPTFILNGKLDPLVPDKFTAQWVKQRSIERYDNIEYFVQENTGHTCTNEMV  
DKVSKWLVKLLSTRK

>2515\_t gene=2515\_g

MSQYFINSSANVGISSRSNATAAKVLPGANFGGKFTNFNILQAVYKVVDGHEIRANLIFP  
RSISTGKAPVIVHFHGGGLITGDSLIEDWFPLWLLDLAEANGAVIISANYRFLPESTGLDI  
LDDIDDFWTWIHSENLTLLSVHEDFPIQLDLDRILTAGESAGLLSIYLTLSQPDKILAG  
TAAYPALGYDNPPLLTAGKSSLLPDLPEYIEEYLANQKPGYVVSSDPTLQRLKLTSAISG  
NKRTMEFYIRNSEKSPHRDRLYQLSRLDKPDAKLPRGGLVILHGLEDVVLVEATTQPG  
VHGFDKDVHLKEPWLSEALKTAIGTWLQ

>2523\_t gene=2523\_g

MFSFLLFLFITLLHVHVQAVLTSNTTSLLTWWHSSNSQTPTGTIADDTVRKSDLYYVQV  
SANTDPTYFYDSFVYLSVPANGMSAYVQYAANTASTQAWSSFLTSEDVVVRVTRPSAT  
VANGSVVIRPTLLNQGFSVSYDSSDDISVYITIPYSENGWRFSVEFSDDLYTPVEGVANT  
EPQHSLIFASPMEDPSIVPVATDDESTFIATPGRVYDTNVTASVIFYPGVYWFSGTDHI  
LLESVTVIYFAPGAYVKGAVEFQSTAAIVKATGHGVLSGEQYVWYADPENGYQTSTS  
ADNNGLRIRWGKNTDTQTFVLQGVITIANQPFNSMDWSGNLEDITVLVSDYKQVGAIFYQ  
QTDGLEMYPGSVVQDVFYHSNDDTIKAYYSNVAQAQRIVVWKLNVAPVIQFGWTSRNTK  
NVTVDTVDVIIHQSYSNAEENPGLIGSNNNYVYAPGGLSNDHNTADTNLTSTGLTFSNIRS  
EGFSGCLFRIYALENLDSIYIRNVWIEKFQDPSLNTTDSLLPAFYDATSGALVSITNFVVEK  
FQVGDYIIWNSDSAVSVGLINVDSYSEAVTYSSA

>2528\_t gene=2528\_g

MVSFSSLIVASAMVTAFAAPT KPLTKRSNAKKGAA YNDASLVSLVTDASWAYNWASS  
SGGTLPSGVEFVPMLWGS DTTGWTDNVEAALASGSTHILGFNEPDLDTQSNIDAATAAA  
LYKEWITPYQDQAE LVTPAVTNGAAPLGLTWME SYLEACNGEGCGQTAMAIHWYADAA  
DTDFESYIAEAYNLAASHGIYKIWITEFQKTGVDDASQASFIDNTIPWLDETSYVERYAYF  
YVANDYLTSGDLSDIGSA YNSDE

>2536\_t gene=2536\_g

MRSTVLAALVAALASTVSAQT TTSQCPLNETCPADLAFGTTHTWNISSSSQLDDTWNIT  
NGVLNYTDDAVGFTINKKLD SPTIRSTFYLFFGRFEYHVRAAPGHGVISSVVLQSDDLDEI  
DWEWVGSEPNQVQTNFFGKGKTIAGTAEYFNISSTHDEYHNYTTWWDKDKLEWWVD  
GQLLRTVTPSNASNSTFDWYPQTPMNIRIGSWPGGDPKEPLGTIEWAGGEINYTAGPYT  
MYVSQVTAQDFTSGKEYNYTDHSGTWESINVIAGNSTVEQELNAVHLSLSQRWNNLSS  
GARIGIIVAAGSVVGLSALAFLFCCRQRRLGKREWNTQNNQWTQERTDMMNMQAEW  
RQKGYVEMK

>2543\_t gene=2543\_g

MASSPTSYPKQKKLPTTFSGTNNNDLILDAGSPHAAPAFPLVSFMWFARGATSQWIIL  
PLILMVVGLFRWAVSLWGYS GFNVPLHGD FEAQRHWMELTIHLPLTKWYFYDLQYW  
GLDYPLTAYHSWLLGKIGSLVDPAFFALDASRGIEDPLLKLYMRATVIVSEYLVYIPAV  
VLFARRYGRLLGVP MWSTSIALIAILMQPGNILVDHGHFQYNTVMLGLMVASVESILTG  
RLPLACAFFVAALSFKQMALYYAPIMFSLLGSCIFPRIRIGRFLAIALSTVAAF AAILAPLI  
VASLNDWAHG TALPGPLPALIADLPIELDAKAWYYTPFLQLGQLIHRVFPFARGLFEDKV  
ANAWCAIHTFYKLHRFPALLQRASLAATL ASISVPCLIFRYPRPQLLLLALSSSAWGFF  
LFSFQVHEKSVLLPLPMTLLFASDGLNKVNRAWIGWANILGAWTIYPLLKREELRIPY  
FVVTFLWAYLLGLFPTSIEIFRARNITTTTKEASVSGLTVLIHTVSYLGMIVWHVLD AFVQ  
PPADKPDLVVVLNVLIGASGFLAYLWTTSNLIAQAYRLSGKPAGDVKKTQ

>2548\_t gene=2548\_g

MKFLNTNKVLQTLA AFSALLPAALSAPANKIDSRIPCQAGVLSACPHKTIIVSKDNSSYSS  
KHASKHAHFTSIQSAILSLPHDNSSATILIRAGSYTEQLNITRPGPV TLLGETSHATNASEN  
QVTVYWSAANNATYLDNAFTSVLTVAPTQNASLTGAGPTGWPVPV DTPYGSTDFRVYN  
IDFRNVFSEYSAGPSLAVSVSYANAGFYSGFYSDTVYIGKLGNAFYD SIIAGQTD  
LYGFGTAWFQSCALQRSCGGGITA WKGNTNTTYTNKFGVYIVDSTINAANASIAATIAG  
KCALGRPWNALHRSIFARTYEDASIRSSGYIDWVNKGVENYTPGVTLQAEFKTYGPGW  
NETGRIAGGWD TILNETVWREYDKPSKV FQFGYVGGGFGYVDWIDKTPWS

>2559\_t gene=2559\_g

MVEAQSQPSTAQTTSIRSDSAIISLVRNEELNGIISMRQLETTWNSKYNYPWIFFNVPFS  
EEFKARTQAETEAECHYELIPEEHWAVPDWIDPELLSEATKRMKKQGIKYAGLLSYHQM  
CRWNSGFFYRHPALEKYKYYWRVEPDVKFFCDITYDPFQFMADHNKTYGFTINIFDDPS  
SVASLWPETQSFLKSHPDYLAADNSLMWLTDRTLRPDHTDAANGYSTCHFWSNFEIGD  
LDFWRSTKYQQYFEHL DQSGGFFYERWGDAPVHSVALGLFEDNSRIHWV

>2561\_t gene=2561\_g

MRGLCYLSVIAAAGHASAAA VFAHFMVGNANNYTLSDWQTDIQLASKASLDAFALNIA  
YGDDTVSESLILAFQAAEDYNFSLFFSFDYAGGSGPWPQADVIGYLTQYSATSAYRYN  
GQPFVSTFEGPNAEDWIEIKAQTGCF FIPDWSSLGAEAAALKAGGGGIVDGLFNWAAWP  
WGTRSM DTYTDGSYNYMGKNISGPDPGSGMPYMMAVSPWFYTNLPGYHKNWLWKS

DNLWYDRWMEAIYNEPEFIEIISWNDYGESHYIGPLYEYAYEAPMTIGEAPINYVENMPH  
DGWRKFLPYVTELYKTGISVVNEEGLVGWYRTSPGQACGTGDTTGNTASQLQIEFEPYS  
VRLPSRIFACNYGFCPMHACECTAQQALVDSNSIYDGKVGTPIPGLEDWGLCAWSCAR  
GYCPPGACNNGTSTGTGSGIVYVEPDVWVDPTPTVGCEPPCTLIFPIPLATPLTFTWPPY  
ATGLYSSSGSVTMTITTIISLAPFTVSEIDFWPVTINSDDPDTGVIFPVQSITPPSTSISLPSDQ  
AAISVGSETILGSDGQVTLGYTGGPATWGGGYVPIQPQPTISIPIPTSDYQTTQGATTTQG  
VTTTTHSVTYTRSSTAVSSTCTSPPCGHRTCLFGCGHGCGLFGCWGGCGLFGCGGGGCG  
LGGCGGGDWNHGC GPAGCGCTFGCDSSGDDGEGGSQGCSPDCDKGCQGDCCGCD  
ESKTVTSCGVLCTQTVAFSTSYLGDCSTTTCATTSCGTDTTSTETTTTTL VNDITITAMAT  
DPIWTPDTTDAFVGA VWS DYLSWSAAK DAAAASASTTTTTTSSLPYPTNTAVNVGSAL  
CFADYNSNGQYVQFTEDDAKAVVAAACDNDSHVLTPSNTYGFVEEYSANGYMVYASF  
SWAADQSGCGTMANLDL TSDGCLDAFD TDFECNGETDNP DYGGAYVYNTGKGCVLIS  
LYAINS

>2570\_t gene=2570\_g

MTSTKQTEKPTHDELNGLGLQNGNAEKTKPVYRQRSSMTLSEILDPLALLSVPFVAFFA  
ILTGPF RARKQKLNPKQTIARSMLLHVGSIFRRVVARFSPLQVQAILPSTSTVYKIYTWK  
KRIKGQSVELGDGATGHVWGNPNAKNVLIIWHGGGF AVPANRGYFAFFDKFLKEMRA  
ANKDIAV FVVAYTLVPKAVYPMQLRQCTTALRYILDKTERKSENVYFGGDSAGGNLVL  
AVLSHIAHPHPDIEPLKLSAGEEFGGATLLSPWTSLETTFPAQDTEPLGDLIHPDCAKPWA  
GSYLAGSERDNYTDARLAPIDWWHNLPIKHVLTAGGYELLFPFIEDFASRLKQGLDGD  
KSDGGKVEFFVGEKEAHVAPM FNMLGDTVETE QGKKVKAFYREVIESN

>2575\_t gene=2575\_g

MANSINH VYDLDMGAYFNEKWQAAHEACLEKLNDSDRRYINNIKTCEAFKDRIPQLQE  
GFAQAATGSILHRLTPFINSLSFLALIAVSTGSTAFETAMIWDVMSLVVQVTS GMPPIFT  
ETMDMLS NIAHDLEMLELEYEKA FEKNPNMGKVLVDIFVEVIDFWTTAIHFFRRNSSQLIA  
LQFWPSVKNDFERVSKRIKQSCAHAKEKANAMTAADLPASTARLLHDMHLDEFYISTH  
GIQTPQSTNTTVLSTPCYEIPFSRNRNFRYRETELTMVDSYLRLDTQSPTIKSLALWGTGG  
VGKTQIALEYAYQRVDAGLESVLWVNCETGLSVARSFTQIAKSLKLEGMDDENTDKN  
RHLVLTWFRNTDGPWLLVLDNVEDDTLARECWPIALRSSGAILVTSRRSMAVDPAAEG  
IHIREFSVQAGADMMLHLVGQSPYSDDDISASFSLSERLGGVLALAVMAAQIRRRWN  
FTRFLAYYERNASKLHSDRRGIQSQYQRSLRSCWYSAFVNLSEQASVFLGVLSFTGPDNI  
PQELFEASVCGPPKDLAFCATDEDSIEDALEELIDFSLINREPETQALSIHRLIQFEYRDI  
GAHERLSRSLTVSEQLYYKFPKQINGVSLRNDWVECKKYAQHILMLCAHWQRYRFETIP  
PGGLGLFIKSLTNCAWYLLESGAWSEEIELMKTA FEVCKDKNGLDYAHL CNTHACVQV  
ER GKAYEAISLIDKAIARTKILGPTHVETAHSYNNYANSVQQA YKTPDSINEALAYYLK  
TIEIDNLQPPDERIKLSYIRHLNISR VYRLLGQYDVGLSHVELAEESVLHMFKTLDTFFGA  
TLIVHRANILFDQGVSEAEQQWHKAFKIFDKEYNTHPATISVRLKLACL RMRRGEVSS  
LKDLQKLLILCELREKAKGDKGEIARVTRRLAEAHLLNGLNLD EASRLKEKAESMRKEIQ  
KHREWQLPDSEMAYNILVWNEYW

>2591\_t gene=2591\_g

MLVYLLGFLCLLSSLVLGQRDNNIQNDPISVFTSPGSGSGNYVFALNIPKNSEDIYFHL  
SGPDAYS WIAVGTGLEMRDSL MFIAYLNSTGNGVTLSPRISTDETEPSYSSSIN VETLSST  
VANGHISVKGRCTKCTTWN RGS L DLNSTNQAFIYALGPSSGSLVKLQSN SITANLERHSIY  
GNFEMNMTKATGGTDGTTLLSTSLSSITSSGASQDGDQTS DSNWPVIIHAVVLSVAFIII

MPGGAIFLRLIPASVRWHWVNQTIATILVCIGGVIGLWLSTMYNRSSSYNSAHQILGIICVI  
AVLAQWVFGFWHHYQYKKHRMPTKFGAIHLHMGRILIFAIVVGAIGLSWSYVKTSHIA  
YVVIAGVIVAIVLVLSVLKRHTSASFSLQTKGSDRSLNAEESYDNIEDPFSNRHEYPYE  
SNTPLASYPHRDDSR

>2606\_t gene=2606\_g

MPHTQVSTHIFKAVGGLSLSIDVSKPANAPENAVVLLHFHGGFLVLGEKTTFPPhWLINA  
CHARGWIYATPSYRLLPESSGLEILSDTLDAVQWVHQNISSRLIAGSSAGGYLALSTTAH  
PSCPPLAVLSVYGMCDPASERYIRPGQALVTPVEDINMSLQEIDAATKDGHLDIAYFPF  
ATPATDKRYRWIRALHEGAQYPDVLRVPGLANQIANQGVSVVPDEFRPLFPMFGLKE  
EFPPTVLVHGDADVLIGFEQSASAAEKMASIGIDVHLERVPAHGHGFEAKTFIDL DAGDA  
QGDDVDMKESLRRVIKKLEKACH

>2676\_t gene=2676\_g

MVHIEEKYQVPRDFEGFEGFDPKWPNGARIAVSFVLNYEEGGERSILDGDNMSEPYL  
WEKGASGGYKENARYLNAEQDFEYGSRSASWRLIRLFKEFGWNFTTYAVAVALKKNPT  
FAKALVRDGHEIAAHGYRWLDVWDYSLDEDKEYIKKTLKLLKEVTGEMPVGAYFGRG  
TPQTHMLFPEVWKELGAEFLWSSEVYNDVVPYWLDPWEKSLKDEERTGMLLIPYNYD  
CNDGKFHMAPGFGSSVGESYENYLKNTFDMLYREGGKMMNIPLHTRIIGKPRCEALR  
KFMKYISEKPGVWVTTRRDIAKHYNEKFPYQPDGKWIETAKKAE

>2678\_t gene=2678\_g

MTLNIFAFASMIGAGLASSHSIQARIQNGLAHTPQM GWNTYNHYGCSPNEAIVHSNAQA  
LVLDGLASLGYRYVTTDCGWTVANRLANGSLTWDATLFPSPGFPALGQHLHDLGLLFGV  
YQDAGILLCGSPPNQTGSLYHELQDAQTFASWQVDSLKYDNCYSDAATNYPNVNYAPS  
TSPESTRYANMSNALLQQDREILFQICDWGVDFPAAWAPSLGNSWRIGNDISSWSSIYRL  
VNQIAPQTNFAGPGQWPDLDMLEVGNNVYTTAEEQTHFSLWAILKSPLVIGAALKD TTT  
SINSVSLAILKQEDVISYNQDALGVSANLSRRYTEDQYDVWSGPLSGKRTVAALVNWAD  
ETRNLTIDL PDIGIQYAGTIKDIWGNVTVDVKTSYTTTEVKAHGTMLLELQDTPSGQYS  
ASIFGTSSGNSTTFEAIYGLTDSSNYTSLITFSSTSSVSEVITVKSSASTQTSTVTLASKKAS  
VSLPITLAAGTTNSLTIHQHISISSITIPPESTYYPNTDFTTTGYATSATCGTGYCLPVGTKI  
GYIGPGGTAVTTISADSAGTKFVEIDYINNEVAFSSGSNARNITVTVNGGTPTRLEVPLSG  
RHSELFPGPLGWWDATLGLILTEGWVQGNHIVIGNDGGAGYSVYAADFVGLRVY

>2679\_t gene=2679\_g

MYWSLLTLPLLAALPISYAQLTGSVGPLTTVAKKAAIKTCNVLDYGA VADLSTDLGAPL  
LAAFNECIHGGLVYVPEGKYAMSTWATLDKGTGWALQLDGHYRNSTDGGMILIEHAS  
DFELFSSNSAGAMQGLGYQFHADGTSTTRLLRLQKVTFSVHDIILVDAPAFHLVLDTV  
EDGEVYNVAIRGGDKGGLDGIDVTGSNIWVHDVEVTNKDECVTVKSPSSNILVESVYCN  
WSGGCAMSGLGADTNISDITYRNIYTSSNQMYMIKSNGGSGTVENVLLENFIGHGNA  
YALNIDTSWAEMSTASGRGVGYSNISITNWKGTQSNGLQRGPIKVLCPDGNPCYDLTIED  
FALWTESGSSQTYTCSNAYGEGFCLASGDDHIA YTTTTTTVKAAPSGYSAATMAADLKT  
AFGISSSIPIPTISFFPGVTPYSALAKASTAAAASPLSAAGNVLIVSSSVVTPATAAVTS  
LAASSVSSAILTTTTAPSPVAISDSASTIPVLVAAASSVTSSAASSASTLISSSSAKSSASAT  
VGVIASLTIPFASNAPIASNSVVSYSVSTSVVYSTQSVPEASSTGVPEPEEEEGCPSGSEH  
EPHAHDHGHGHLHRRRVTRD

>2687\_t gene=2687\_g

MASNTSLDDCTIVWLCLEVELRAAITMLDKVLDECPPRARGQNVVYTIGEIGLHKVAV

VGYYQEQLAASGSIAAEVMRDLRNQLGLLVGIAGGIPSSSTHDMQLGDVAVAVPEGD  
RPGVVGYDFGKTGDDDQYQLKHWQNSIHPLLRSVISKVRAHDELFRRHQLVLDRLPEF  
RRPESCFPHVTSVHPKVHYGTILSGNTVIKSKVKREELRQLYGGIAVEMEAAGMMTRLP  
VAVIRGISDFADSSKDNKWQPYAAITAAAYAKEVLLRPLSEHQEDWKYVREKDMHETR  
STPFADKDLRLAQLVPEKSAFVGRAEEMAFLEELGFRDQAPIQKSVVCLWGLTGAGKS  
QLATKFVSQQRLTHPKREIFWINGEDESFEERSITSMKSRDNSVASESNHLTGLSDEKRE  
RLINLFFAELNNLEDARWLLVIDGVNETPPRSALKDLSSLDIHRYIGRLNRRGYVLLTSRRR  
DVVERYPSRELKGLKDRDAISLLQLKTHPQLMEGAQDLVGLLKGLPLALCLATSVISR  
YRCSVREYLKMWNCSQASEIMGTDETLYRSLELSLEELEKADPVAAKILTLFSLHHG  
DLWYDLCYNATDDTYPTWLQNLGNEKKSFRHYPLLADLSFIELRITTKGSRFWETHPA  
IQVVARQRAKASEQEYIRCAVSLVASEVPRSFEANSWETIRRLGPHARLCWDYVKQGA  
WGPDTNLTDES LGHVFRHIGHYSEASLSYRMIEHGLGFLPSTRDNNEFLANVLTNLGLV  
YTRQRKFNLAGAFDRSQRLMIELDILTPIVSMSIMYNKAVVFMTERLNEAESLLQNA  
VVLVSENTINGHTWKRSEWNVLHLRILNDMGEVSLRKGAGEAALEFFRDVYNSQRAW  
HDELHPNLYSIKLNMGALTKLGRFSEARALLFEVIAIYTEWWGRHHPETMRAIDELAW  
TFMEESKEKQATNETGGAEIQKAEELWTEALNFYQSTDGDESDMVTRIEANLRYLYS

>2698\_t gene=2698\_g

MELSPYTLTTSATIQRQIWSWNATVPEAGDTCIHVLITNKARQQPDALAIHAWDGKW  
TYGELEELSTKLALLLLDSGVGPGANVAICFEKSKYTPVAMLAVMKVGGASVALDPSQP  
EERLSITTQVNPVILCSASKSHLAKSITTKSVLALTVDGTTLSEMTEKSDAESRLPVVSL  
DSKLYLVFTSGSTGTPKGVIVTHRNYASAILHQQKAHGFKSTSRVYDFASYAFDVSWSN  
LIHTLTVGACL CIPSDQDRKDDLVESIRSLRATHVDVTPSIARLLPDSLLCEIETLVLGGEK  
LSVELARHWSSLVTLKNPYGPSECTPTATIA TIRPDDDDSKLSSIGRGLGVNTWVVDSEN  
EASLMPIGQVGELLEGLV GAGYLNDQTKTAAGFIEDPPFLLMRGDGSGEPGRRGRLY  
KTGDLVRYNKDGSLTFVGRKDTQVKVNGQRVELGDVEHHRHYVTQSAVVVRQIVAE  
MILPKNGSNTVLA AFLEVDLGGQDTGMVQDSTHEEIIISNLRNLTQDVPSYMIPAVFIPV  
GNFPLSATGKVDRRQLRAIGESMDLA AFAKFNA AQNETHIPLTLREKQLRRLWCSVLKI  
DESLIAVDDNFLQKAGDSNAAMKLVTVARGEGLSLSIANVLKYPRLQDMAQVVTLEN  
SQIHEIMPFEELS NHVDLNQALREAAALCNVQVDRIQDMFPCTPLQ EGLISLSAKREGDYI  
MQYMLELRLECDIERLDEAWAAVVAKTPI LRTRIVNITGQGLVQVVLDEQWTTLP TQGI  
SLSQAKNQKHEFGLGMPLARFEIVTDDMSDFKH YFVWTMHHALYDGWSIQLLFDKLEN  
EYNRKKDAPAQSPDFKHFIKHISARDGEQT TAFWTEQFRDFEAQIFPSMPSADYQPRSDK  
MYTHSVERIQWPRNGITASSTIRAAYSILVASLTDTPDVVFGSITTGRQAPVADIEDLIAPT  
IATVPVRISIDPKEELGQFLQRIQSQAADMIEFEQTGLHQIRRISADAERACQFQTLLVVQP  
EESTTAPSNIFIDIADDIKQGDGNSAAELGTYAL TMECLLKKNGLDLHMSFCSAVLSEHQ  
VRRLSQQFEHVLCQICHLAEKLRQSTALGSLRMPATEVELQMQR IWAQVLNHD PATIG  
LDYNNFFHLGGDSIAAMKVVEARKLGLKLA VSDIFRHPNLQDVANKASESALQPHVED  
KSVNGVEIQINGDIEHTQLSNNAKTVGGRE AQVMLWEEMYDKEVYVTLDDVQLEKIG  
REFTGWTSMYDGNQMDTGELNEWLDDTIATIRGSGSTANILELGVGSGNLFNLVKGLH  
RYIGLDPSEKIVDFVRSTVKTIPQLADRVR IIKGTADKINDLDVPISANLVIINSVAQYFPSQ  
DYLYKVVVDLVQLKTARTLFFGDMRSYALFREFQITRALHMTGNAATEDEIRQMMAN  
MEQAELELLVDPAFFTSLVDRFPELVEHVEILPKRMKSTNELSAYRYAAVVHLKDASQL  
AQPVVHDIQEDTWIDYTERQLNRESLLQLLQDSSLQDPSPSSIVAVCNIPYGMTIYERHV  
VDWLD RGLTAGPGPENWLS SIRQKSQGCSSLSALDLAQLAEEAGWQVELSWSRQYSQR

GGLDAVFHQIHLPERRGGRVLFKFPDTHQGRQSRAFSNSPLQRKQQQEVNEKITLADIST  
VSKEDLYDIWAWNGTVPDVVEVCIHDMISETAQKQPQFPAIRAWDGEWNYGELDDMS  
TRLARALVPFRVANTIVPVCFEKSKWTPVAMLAVMKAGAASVTLDTSQLDRLRSIISQ  
ASPRVILSSATKQDLAVQLTRVNVVVEDSISTFQTAGEPLPTVDPSSALYIIFTSGTTGV  
PKGVIITHSNFSSAIYHQEAHGFKKESRIYDFASYAFDVSWSNFIHALTIGACLIPSDAE  
RRDDLAGSLERFGATHVDLTPSAASLLPEASFRRLLETVVLGGKLSVEYAQRWSSWTL  
KNPYGPSECTPTATIATVPTDEYQSSIGKIGLNTWIVDTLRGCSLVPVGGV GELLLEGP  
LVGGGYLGDDAKAAASFVQDPDFMSQVCPQGQVRPARMYKTGDLVRYNPDGSLSFVG  
RKDAQVKINGQRVELTEIENHIRRNSQTAQAAVLYSKSGLCANQIVAFVCIQGTGKTQT  
ADQIRLVDSKHSSLVAAAIKSTESLLGEALPAYMVPSIWIPLEHIPLSTSGKLYYKALKSW  
LDGMDANMFAKISPAAADGDVELRKAETVVEQAIVDACVQILNVSASKINLDRSFIANG  
GDSISAMRLVAHCRAANINFSVAKLLKSKTLAAFASSSDIKSALNVLASYEEKSDPFALSP  
IQQWFFEQGSYRKSNDTFCNQGFYLIKIRPLL TNDLDAISKIVRHHSMLRARFQRNGEE  
WTQKTLKADTKGSFHFTRYMCLMTDIERLAQLRHQSLDIEEGPVFSADVCHTVFGDQ  
YLVLIAHHLVVDLVS WRVILEDMETLLGGNDLQPSLPFQVWNHMQUIERSKDSSQLDPEH  
VLSTSGINNLDFWQATAGIKNTVEDHLMYSVKVDSRVTELALKDANRPFNSEPVDFL  
AAVWHAFFETFPQREDLTIFIEGHGREPWSSDIDL SRTVGVFTTISPNNVSKIDVQQSVGN  
LVRFVKDARLLPANGWAYFTSRYLNESGKA AFKAHDSIMEITFNHGHGQFQLESEDT  
MFENVTL SGVCEQGPALPASSLLAVEVSLDRGQANFEISANRHIKHQDRVPIWVNAISNS  
LEIICNELTSRTTTSRTLCDYEFSLGYTELNELHENVIPEIERLNHSTVENIYRCLPTVDGI  
LISQYKDPESYKTVQHFEITSQGHEPICINRLSQA WQTVVSHQPALRTVFIPSLDKAAAFN  
QVVL SQYHSQVILLAVSGDDAEALEMFKTLSPVDYQNLIPPHRVAICQISPSRVLQVEM  
SHAITDGASTSILADDLLKAYSGNLRPMNMDTADSFARAQLVASTESKMSYWKDKLS  
GMGTCHFPKISDSSAQGIGTSICHISGSSFS DIKKYCNSAEITTATLFQTVWALILAA YTN  
DSTSGYLASGRDLPINGLDK SIGAYTNMLVCRVDIRRDTGARQFIRGIHQVMQDLEH  
QHCSLASIQHEL GIESGNALFN SIYSYKQDDEEVGAETLAIKALDGEDPTEYDIVVNISHA  
IDRIEIVFDYTHACTSSQAERVL SLMQTTTATLIHHASVDSETLTSLNMVSSSEDVFDIWQ  
WNSEVPD TVEDCVHHLITRTCQKYPQAQAICAWDGDWTYAEIDYLSSQLARHLVSYGV  
GPEVVVPLCMEKSKWTPVAMMAVMKAGGASVAMDSTQPEERLKKIVTQV NAPVILSSF  
ANQQLASRLISQLPKSTKVITINDVTLATLSPTRGNQLPEVKPNNTLYVVFTSGSTGVPKG  
VAVTHSNIASAIKHQRHSLGITAESRVDFSSYMF DVVWCNLLHCLSAGGCVCIPSDNDR  
KTNFMAAIIRLRANLAILTPSATRGLNVDALNSLRNLHFIGESLHVDTFRAVEPSVTVSNL  
YGPTECTTFSTIQIISGRNPQSVAIGK GAGPNTWVADMATGTSLVPVGSAGELLLEGPLV  
AAGYLDDVVK TAAAFVSDPPFLLRGSVGHPRRRGLYK TGDIVRYNSHGTLTFLGRKDS  
QVKINGQRVELGEIEYHVREALLPDFIEAQGIVEFVSLQSSRSMLVAFVCFGPAITARM  
DENNLLSLTKRTAALLEERLAARVPAYMIPSAIYIPLERIPITATGKTDRRRLREMAKALT  
WEQLTATNLSSAERCPPSTAMEIQLQALWATV LGVDSSLLGAHDHFLRVGGDSVGAIRL  
VSRARELGFTLNVADV LKSPKLSDMAKLMGRADPSHNSQVEAFSLLKPGSNVTATIMET  
AAICDIDVNQIEDVYPCTPLQEGLLALTTKRP GDYTIRCILELKQSTDVEKFR TAWETVLE  
STPILRTRIVDVVDQGLVQAVTKQPAQWTSADASNLVDFVNADNEKTTGLGMPLVRFA  
MIHDMNKHFFVLT LHHAVYDYGWALNLVFERLEHAYAGTLTQKLPDFRHF IQHISSIQSE  
AAATFWNNQLRASEAPT FPSLPAATYEPKPDKNLSHTVAGLQWSNTDVTAF TVVRAAL  
SILTAVYTDSQDVCFGLTSNGRQVGVSGVDQMVGP TIATVPVRVGIAREQSLKEFLSIQ  
QQAIDMIAFEQFGLQRIRKLS PDAERACDFQTL L LIVQPADETAQWHSDIAGDLSEEEQVP



ELGTYALTLECHLGPDRLHIKANFDSNVIEETQVQRFTQQLEHVLRQICCSDSDAVVSDIE  
TISKEDMEYIWARNGVVPESVNTPVHDLISAVARRLPHLQAVCAWDGNWPTYRELDNLS  
SDLAHHLVGLGVTSQHVVPLLEKSKWMPIAMLGVMKAGAASVAVDTSQPEERLRMII  
DQANPIVAISSNKRSLIQNLTAQTVVVDDHSLRTPSRPSADATLPIVDPSSRYLVFTS  
GSTGVPKGVIIHRCNFASAIKHQKRVQGILPTRVDFASYAFDVAWANALLTFEAGACL  
CIPSDTDRKDDLNGSIARLRPTHADLTPSAALVLSEESLLQLDSLTLGGERLLAEHATKW  
SRFTTVKNSYGPSECTPTATFTEAIFPGCHLGASIGRPAGLNAWVADPATGQSLVPIGSVG  
ELFLEGPLVGAGYLGNAEKTNAFPIQDPAFLLRNGSGRPGRRGTLYKTGDIVRYNSDG  
SLAFVSRKDAQVKINGQRVELGDINSHLARYAATRQVATLLSRIGPCANKLVAIISFKDV  
QDEIENSITLVSSKHAKVVSEHIEALQSFLHESLPQYMVPSLWAVVNSLPMTASGKQDDK  
ALHTWLQNMDETLFASITNTNGSVVREPSTEAEKILSKACSIVLNIPVGNVNLDRSFIAN  
GGDSISAMRLASHCRAAGIAFSVALLQSKTLANFAASSGITTARAVKQKEEFDVPLGLS  
PIQRWFFDQSPFNKDRHEQFYNQGFYVRIRRNALHDLESALSALVNHHSMLRARFQH  
SEGQWKQVVLRPSKQAHHFDTSQHQSMGEIARLAQERHRQVEIENGPVFSADLCTLNH  
QQYLIMIAHHLVVDLVSWRVILDDLENLLNGGSLEDALPFQVWNKLQAERGESLQKLP  
HKLLSTDGVHNNLEYWKYTS DIPNSLSDHGLRVIDIDEETTAMVLGDANRAMNTEPVEI  
FLSAVWDAFLRVFPQRDGLTIFNEGHGREAWSDEIDLRTVGVFTTLPINVSRTDATS  
TNLVRVFKDARRRLAANGWSYFTSRYLNPDGQKAFESHNNISEVVFNYHGQFQLESQ  
DALFEDLDLVDVREQRSIPAGSLFNIEVSIEAGQAHFEFFFNRRIAHQGLIDQWIDQIQPS  
LQTICLSLLGASPTRTLCDFEFINIGYQHLDDLTRRVLPEIESINQSYVEEYPCSPADGML  
LSQIKQPESYKTLQHQVFSPEGHPISIDTLASA WQKVISRQPALRTVFTTGLDGSAAFYQ  
LLLQEHSQSVVIVEAKNKEDVLRAFSQLPIVDYQQQKPPHRLSLCQTPEGEVFCQIEMSH  
AITDGVSSSVLIKDLIDAYAGNLSSTDLVKTTTRDFAGHLLAKKHSEKISYWKTKLEGLES  
CRFPYMSGLPREEQGSTSEIGVIIEGKTFARIQDYCSTHQVTPASLLKSVWAVTLSAYVES  
ESVCFGYMASGRDLPIAGIDESIGAYTNIMVCRAEVDRQQPGVTFVRNIQEQLMQDLSFQ  
HTSLARIQHELGLLSDQQLFNSIVSFQRSEDLNEQYRQDSKLYDIVLGINHGAKTIEIDLD  
YAHHCLTDKQAGRILGHLQSNIVAILNSEIPTLISPQDEQDVWAWNSTVPDTANICVHDLI  
SETVLRQPDAPAVCSWDGDFTYAKLDHLATRLANGLVKLVGVRGDIVPICFEKSKWTP  
VVMLAVMKTGAASVTMDTSQPEERLQSIVAQVHTKLIICSTAKRELAKLTTADVFAVD  
QTIMEMMLDETPLAAVDPASDLYIIFTSGSTGTPKGVVITHSNYSSAIKHQQSEHGFKHSS  
RVDFDASYAFDVSWSNLLHTLTIGACL CIPSDEERKNDPAGAIERLRCTHADMTPSAASV  
LPASTLARLETLVLGGEKLSPEYAQRWSALTSVRNPYGPCECTPTATIEIISADMNKGVS  
SIGKGVGLNTWVVDPATAQSLMPIGIPGELLLEGPLVGAGYLGDHVKTASAFIENPEFLV  
KGAGPGFPGRGRLYRTGDLVTYNSDGSLTFVGRRDAQVKINGQRVELGDIESHVSSCL  
VGNRAQIVVEVTPQESPNSMLVAFVCFDDPTFVSLGDAELLARTERATRGLGEKLLT  
QIPSYMIPSAIYIPVSAFPTTATGKTDRRRLREMGSSLTLEQLTAMTAAQEYQPPTPME  
LALLELWTSVLRGTRKISTTDSFLQVGGDSIGAMRLVGAARNGLSLSVVDILKHPKFS  
DMVGLLRPLDSQQFEQPHIYQFSLLSKDYSKEQVLSRLLDLGIDSNNVEDILPVTDYQA  
RCIAMTHSASRDLLL YHTLEGSMPNPKMRAVFSELVDRFDLMRTL FVAHKDNFLQV  
VLKTLSDIPVLR TENASLEQCTEELRLRDMDELRYGSLT SITIVYHIRDNQYRVVRL  
SHAQHDGMSLVNMWNAFETMYSNNRDDSQHMHSDTSIQDRSRARFTNYMHAVAGIN  
HEEAKTYWRLLQGSSMTLKP HASHTLSYGDGPCVTRHVPRIIAKSTGFTFSTILKAAW  
AYVFLAMHVSNSDVVFCNLTHGRNLPQTQDVFACVNIIPTRVSFTDGWTVGDVSTINA  
QQIASLQHENIGTREIVRDC TSWPKW TYAGSIVYHHDFFDDGTYVDHERGIHVEQELNLS

HGRVDMTDVHITSKPNENMFQIELSFAAGVVSERDAKLLAAKL TETISMFKSMDLALL  
SPHEIRHMRQQTTLPLSEKPASAIPTKEQLMVASISPTAMESALDSAWRDAFKRHLSPEIK  
ASETIFDLGGDLITASLISAHMERQGHILSIEDVLEYPTWFSQLTLLTKRSRGDQVDV

>2700\_t gene=2700\_g

MTVSRLASVLCALVLGQSALAAPHL SRRATTS LD AWLASETTVSLNGILNNIGASGAYA  
QSASAGIVIASPSTSSPDY YTWTRDSAL TLKVLIDLFRNGDLALQTHIEEYVNAQAHLQT  
VSNPSGDL SNGAGLAEPKFNVDTTAFTGSWGRPQRDGPALRAIALIDFGNWLLDNGYSS  
YAVSNIWPVIRNDLSYVAQYWSQSGFDLWEEVNSMSFFT VANQHRALVEGSTFAGRVG  
ASCSWCDSQAPQILCYLQTFWTGSYINANTGGGRSGKDANTVLASINTFDPQATCDDVT  
FQPCSSRALANHKVY TDSFRSVYSLDSGIAEGVAVAVGRYPEDSYNGNPWFLTLAAA  
EQLYDAIQWNKIGSITITSTSLAFFRDVYSSAAVGTYASGSIAFQAIISAVKTYADGYVSI  
VQTHALTNGSLSEQFDKSAGTELSARDLTWSYAALLTANNRRNGIVPPSWGAAANSVP  
SSCSTGSATGTYSTPTGT SWPSTLTSGSAGTTTTSATTTTTSVSKTTTTTTSATSCTPTSVA  
VTFDEIATTTYGENVFISGSISQLGSWDTSKAIALSASEYTSSDNLWFVTINLPAGTTFQY  
KYIRKESSGIVWESDPNRSYTVPSGCGVSTATESDWR

>2704\_t gene=2704\_g

MSLSRLALVPQYDFIIVGGGTAGLAVANRLSEIPDITVAVIEKGDSVFNNRNVTQTTGYG  
LSFGTEIDWAYETDNQTYAGGSKQIRAGKAIGGTSTINGKGMTYTRAQSVQIDAWESV  
GNGGWNWNLLPYYKKS EDFQVPTLDQIDHGADYFIRYHGENG PVKVGWPKLMTNSS  
MLPVLDELSEVGV PYDRDVNDGTMVGLTSHPN TIDRDANIRHDAARAYYWPYEDRSN  
LKII SNTQANKIIWAEQSQSEAIAIGVEITGDN GTEVIHASKEVILSAGSLKSP LLELSGIG  
NPNILKKFDIPVKVNISTVGENLQDQTNGLSYD GREFWLGSP TFSVLPSVEHIYGDNVSS  
VASAVNSSLSDYAKAVSNF SNGAVLEANVQAAFQIQYDLVFKHRVPYAEIVLLPIAHSFT  
SEYWALLPFSRGSVHMASSDP SHPPSINPNYFMFEQDLNSQADVARYIRKIFNTSPLKSLV  
GDELAPGLDLLPEDAPESNYTSWVKSTYRSNFHPVGTASMLPREKGGVVDADLKVYGT  
ENVRVIDASIIPFQVCGHLTSTVYAVA EKAADIKKKYT

>2711\_t gene=2711\_g

MKSFLTLLPALFLTALGSPTS EDFS KRDDRGSKTVSGIGAHKTAILNAGGNTLDLAIAML  
EIKTMNTADYPYGDGKTYDAANFGLFKQNWGMLRECA YRYGFKGQS QNDWNNGARL  
NSDVYDDVASRWDCQEYYGYDKWFGGHRDGATGLANPYTQDITNYKNAVEWIQQQI  
DSNDQYKWDDTRFWVYIPPI

>2722\_t gene=2722\_g

MSIAKDALFVGP TTRQRKRVR LILVATIAAAFFFSYNFSRNRVLYSPIS SHDHGHAGSVA  
TPPSSFTTGAGTCNVDTGVVERYGLSGDVKYTRREIYVVLTDKEETPITTMQMDTNLFDV  
APTTLSGDVETT VNCSDPITVRVPPSLPFRDASHIDFAISTNMERLMDSMDAFSVWAGYT  
NTRFLVFIEPGADQRKAQRKAKSLGLNIELFESD VDYENRYSLLVKLLADNARPETKWF  
CIMDDDTFFLSMSRLLQMLDKYDVSKPHYIGTVTESDSQLSMFGIFAYGGAGMFFSRPL  
MDELGRIWDECDAGTDHGDGKIAHC VYQYTRTKLEMETGLNQLDLMTDASGWFEAAR  
SVPISLHHWKS WFEADVVKMTAVRDVCGTNCILRQWRFADGWLLTNGYSVIHHGAGV  
TDDYGAFAMEKTWDDLNGSTDES FVRTLGPLRSKEEDKISLRLEDVIVEGGQVRQFYIR  
RVQGGDEVLELVWRVN

>2725\_t gene=2725\_g

MVVTTALAALNLLTLVQGA VVEFVPRASGSLDSWLATETPIALQGVLDNIGSSGAFTEG  
ADEGIVLASPSKADPDY YTWTRDSAL TLKTLIDNFIAGTSDLESTIKEYINVETVIQGISN

PSGSLADGTGLGEPKFNVRNRTAFTGWSWRPQRDGPALRATAMIAYANYLIDNSQTSTAK  
DIIWPIVQNDLAYVAQYWNQTTFDLWEETQGSSFFTTAAQHRALVEGNTLATS LGESCA  
NCV SQAPQILCFLQSYWTGSYILSNFASNGRTGLDANSILGVIETFDPEASSCDDATFQPC  
SAKALANHKAVTDSFRSVYSLNSGIAAGSAVAVGRYAEDVYQGGNPWYLATTA AA EQ  
LYDAIQWKKIGSITITSVSLGFFQAIYSSAATGTYASGSSTFNALISAVQTYADGYMSIV  
EKYTPADGTLAEQFQRDTGAPLSASALTWSYAALLTAAARRAGTVPASWGSSNGNTVP  
TTCSASSATGSYTSATNTAWPTAPTSSTRPSCTAPTKVAVTFQEIVTTS LGQEIYLTGNISA  
LGSWSTSASEAILLSAQDYRSADNLWYVTLNLP SGTAFEYKFFKNESGTITWENDPNRV  
YVVASDCGVSTACINDSWQ

>2726\_t1 gene=2726\_g

MKLSLITSVAVAGLLAQAAEAATPDEWRSRSIYFLLTDRFARTDNSTTAECDAQLGQYC  
GGSWQGIINQLDYIQNMGFTAIWITPVTEQLPQSTSDGEAYHGYWQQDIYSINSNYGTAE  
DLQALATALHDRGMYLMVDV VANHMGYAGAGTDVDYSVFNPFNSQDYFHTYCEITD  
YSNLTMVEECWEGDNIVSLPDLDETESTDVQNIWYSWIPELVSNYSIDGLRLDSALEVQQ  
DFWPSWVNASGVYCVGEVDNGDTTIACPYQKYLDGILNYPTYFPLVRAFESTSGSISDL  
YNMVENTVKSDCSNLLGSFSENHDNPRFASYTDFSLAKNVLAFTILSDGPIIYAGQE Q  
HYSGSSVPTNREATWLSGFDTSAE LYTWIAKLNQIRNYALQWDNGYTTYKSYPIYQDSN  
NLAIKGSNESQIVTVLSNSGADASSYSLTISGTDFTAGEIITELITCTNITVS DTGDITVPM  
AGGLPSVLYPASKLLESGHPC

>2730\_t1 gene=2730\_g

MPFVRKRLVIPAFILTFLIYIIISIDYDDYPPERPPPPQDFHNDDFLDEPVHWHKISEHYP  
VKQFIQLPTGSASSIPKIQHEFTKEKTSDRRTRLERQSAVKEAFLHAWTGYKTHAWLKDE  
VSPISGGYVNSFSGWAATLVDTLDTLLIMGLDDEFKLALDAVDQIDFTTTT DKSINVFET  
TIRYMGGF LAAYDLSDGKYPLLLKKATEVGFVYGAFDTPNRMHVS RWDWKVSLAGT  
PLRASP KTL LAEVGSL SLEFTRLTQLTGDPKY YDAIQRVSDNLETGQSKTTIPGLWPMVV  
DLQNLNWGGNQYTLGGMADSTYEYLPKEHMLGGTTDQYRRMYEKSVDPIKTNLLFR  
PMIKDKVDILFSGTLDGNNLDYEGQHLTCFIGGMFGIGAKIFDRPEDLKTAEQLV DGCIW  
AYDAMATGLMPEIFKMPCEGLDKCPWDEKKWLA AVAKTSHVNAV DDEVIYKFITEA  
GLPPGMTRVVD SKYILRPEAIESVYILYRITGDKKYQDAAWRMFSSIEKMTRTDIAHASI  
KDVRFTDSMQVDKMESFWLAETLKYFYLIFAEPGVVSLDDYVLNTEAHPFKRPA

>2819\_t1 gene=2819\_g

MSALNSFNMYKSALV LGSLLATASAAQIGTYTAETHPSLSWSTCKSGGSCTTNAGSITLD  
ANRWRVHGVNTSTNCYTGN TWNTAICDSDAACAQDCALDGADYSGTYGITTSGNSLR  
LNFVTGSNVGSRTYLMADNTHYQIFDLLNQEFTFTVDVSNLPCGLNGALYFVNMDADG  
GVSKYPNNKAGA QYGVGYCDSQCPRDLKFIGGQANIDGWTPSTNNSNTGIGNHGSCCA  
ELDIWEANSISEALTPHPCDTPSQTICTTDACGGTYSSNRYAGTCDPDGCDFNPYRLGNT  
NFY GAGLTVDTTKPFTVVTQFVTS DGTSTGSLSEIRRYVQNGVVIPQPSSKISGISGNVI  
NSDFCAAELAAFNETSFTKHGGLANMGTAIGEGMVLVMSLWDDYSVNMLWLDSTYP  
ANETGTPGAARGSCATTSGNPKTVESQSGSAYVIYSDIRVGPLNSTFSGTPGGSTTGSSST  
TTASKTSSSTTSASSTSSATSTGTGVA AHYGCQCGGINWTGPTVCASGYTCTVLNPPYYSQ  
CL

>2821\_t1 gene=2821\_g

MRSFIGLAGLAF LSSTVLAAPAPAVTAPATLENRATSCTFSGSNGAASASKSKTSCSTIVL  
SNVAVPSGTTLDLTGLNSGTKVIFEGTTTTFGYKEWSGPLVSVSGTDITVEGASGAVLNGD

GSRWWDGKGSNGGKTKPKFFYAHNLKSSSISNLKVLNSPVQVFSIDGAETLTLDSITIDN  
SAGDSAGAHNTDAFDVGDNSGVTISNAIVQNQDDCLAVNSGTNIIFTGGTCSGGHGLSIG  
SVGGRSDNTVETVHIENSTIKNSQNGVRIKTVYGAKGSVSGVTYKDITLSGITKYGIVIEQ  
DYENGSPGTPTTGPVITGLTIDGITGSVSSSATDVYILCGSGSCSGWTWEGVTFTGGKKS  
SSCKNVPSGASC

>5313\_t gene=5313\_g

MASGKIIADFFKSACISIAAATGLYAILLALLTISIFQSHVVYLHAIQMTWFKDLNVPENFG  
FLRNQVTPFSIKTPDGEHLYSWHILPIELYRKHEESLIAEPVGFVSNITSRLAFQLLRDDLD  
ARLILMHGAGGTVGSYRVPNYRALSAGQPCKIHVLTFDYRGFGRSTGSPSENGLILD  
ALTVVDWAVKACIPPSRILIFGQSLGTAVSIAVSE

>5324\_t gene=5324\_g

MSSSSGRYIRYVLFVAVFGLAILGFISRSSLPLPSDYASSLLPQTQKDDTHNNQAGVIDPNN  
QTPANTGPPPLTPSGDRVNATFVTLARNNDLWEIAKSIREVEDRFNRNYHYDWWFLNDK  
EFDDEFKRLTSALVSGKTHYGLIPKEHWSYPEWIDQDKAAKVREDMKERKIIYGDSESY  
RHMCRYESGFFFRHEMLNYYEYWRVEPSIQLYCDVSFDPFRYMVDHKKKYSFVLSLY  
EYYETIPTLWDSTKKFMKANPQHIAEGNSMGFLSDDGGETYNKCHFWSNFEIGSLEWLR  
SDAYIDYFTSLDHDGGFFYERWGDAPVHSIAAGLLKKEEIHFFNEIAYYHVPFTHCPTG  
EQTRLDLKCHCNPSDNFDWKGYSCTSRYFHINNIPKPEGYEKESN

>5345\_t gene=5345\_g

MKQTTSLLSAIAATSSFTGLTAAQKLAFAHVVVGDAAHTQSTWENDITLAHDAGLD  
AFALNGGYPDSNVPTQIANAFACEALANGFKLFISFDYLGQQPWPASEVVSVLQEYA  
SSDCYLTYENKPFVSTFEGTANIGDWAQGGTIRSAVDVYFVPDWTSLGPNGITQYLDNID  
GFFSWNMWPAGAADMTEPDLEWVSAIGSKTYMMGVSPWFFHSASGGTDWVWRGD  
DLWADRWNQVMSVDPQFVEVVTWNDWGEASYIGPFVTDSEVPNGSSVYVDNMPHESF  
RDFLPYIATFKGNTFDISRDQMZYWYRLAPAAAGSECGVYGNPDQGGQTAVDVNSV  
QDKVFFSALLMSAATVTVQIGSNAAVSYDGVAGINHWNQDFNGQTGAVTFSVVRDGA  
TVKSGTGAEITASTSLSNGCTNYNTWVGSF

>5355\_t gene=5355\_g

MRYPAPLRSLSAICLSLLALDVASAHSPKPNYPKGSPLDPSKPLEVDLGYAGYVGVNN  
ATSGLSWYGIYAQAPIGDLRWQVSVPPRTQFSGTFFNASTHGPTCPQAPDHLTSPEPA  
WTASTSISEDCLFLNIWAPENAADLPVFWIHGGGYGAGNADTDMSWVETPVTKFVA  
VAIQYRLGAFGFLAGKEVQEHTANAGLYDQYLALQVWQRYISLFGGDPDRVTIGGES  
AGGGSVMLQAMAYGGTVGDELYDGTFFASPIYQQYNHDDSVPTKYYEQFAAEAGCS  
HGKTESVFDCLVAADTDVLQNASYTVTINAKYGQWAFVPTDGGKFKVQRPSEQLSTGA  
VNGNRGLIGNNANEGMAFTPNVTTEEDFVEFVKYLMPLNDNQFQVLAEYALPASI  
PTVGFATNGLTENATANFVSPYAVGQQQRANNLYSEITFVCSAYWIADAYGLKTRQSY  
KYEFSLNSCHGDDLPAFYGNAPATMGPTFQDSFLSFFDSFITHGTPSNTSSYAADVPA  
AGVLSAWPSWTPHDRAQINLNQTGGTLTISMGDYDPYRHVINTYVNPGMVPSFSLVDG  
YGWEGGRGRRCDFWKSIGASVPEKK

>5364\_t gene=5364\_g

MLRTFVFTLLGIVSGENGSAGWLRYSRLPNSVVRNFDPPSQIITLNASSSSPIYTAGKEL  
ENGLKGLFGRDVTHLSSGCGSKSSIIVGTVDSTFACGSLNKEVVLEDDGFWLSTEGHSV  
QIIGQNQRGALYGTFEYLSMLARGNFSKVSYSNPSAPVRWTNEWDNMDGSIERYGG  
LSFFFANASVLSDLTRATEYARLLASIKINGVILTNVNADPVTLKPENIKGLGRIGDVMRP

YGIQIGIALYFASPQTLGGLPTFDPLDKSVISWWQNVTAEIYSAVPDFCGYLVKANSEGQ  
PGPLTYNRTLAQGANMFADALKPHGGIVMFRAFVYSLNISDWKADRAAAAYEAFQGL  
DGAFRDNVIVQIKARPLDFQVREPASPLFGYL RNTNVAIELPVSQEYLGQQSHTVYLPPL  
WKFVLDTDLRVDNESSRVSDIVGGRRFKRQLGGFAGVANAGSNATWMGSHMAMSNL  
YAFGRIAWNPDEDPETIVRDWSHLTFGLNPDVTDVITHIHMSWPAAYLNYSSGNIGLPTL  
TDVTNNHFGPNVRSQDNNGYGIWTRSDSF SIGMDRTVKNGTGFAGQYPSEVAVEYENID  
TTPMELMLWFHHVNYTHLPNGQTVIQYMYDTHYNGAEVAQTFPIMWEGLKREIDQQ  
RFQEVHLQLTFQAGHAIAWRDSIVDYHNL TQIPDEKG

>5376\_t gene=5376\_g

MLDRVS VLLPTWTQPSITQTVLGLGVINGIEEFRGIPYGRVPERWQHAILLDRLPDDIFD  
ATHNGPRCPQPQEPNNSDFYQSYLEFPSDVTESEFDCLNLFITRPSRLTYGEENKLPVYVY  
IHGGGYAFGAGTDP MWDPARLVAKSIEIGTPIIVVTINYRLNLFGFAASSEIIDSQSPEQRR  
GCNFGLDQNIALRWVQRNIGAFGGDTSKVTVGGQSAGGSSAHAILDAILGSKAPLVQ  
RAIIQSGAVGVLGPLTMTDADRRWAVLCDTLGAPAEDAAERMKFMRNIPPYKILEACRD  
LAWNVCPLVQDDLTISRADNRWNVHFTISDDPVADAGACGKLEYAVLIGDTELEGTM  
HRSEVTQIKSLEDLKSRLASGSLREETFMNAFCDIYRLEANVSAASLHEQIFRFLSDVQFG  
YPVQQAREDLITREVSVKELSQQKSASSFHPIQVHSYRVEVGNPFPGNHGVAAHHCVDLI  
YIYDAFHDAALCAVDVASPTEGTSNAELVNQVQTNWITFIAAPSIEETKDLATLYTFDRKV  
KVVNMSLDKDWDRKR RRFDFISQYTNAARQVAKIITRVDDIS

>5385\_t gene=5385\_g

MASSSSDLEGLHAFITGAAGVVGSHIIQEFLDLGCYVTS HDSKPYELPPHKYTDHLNSFY  
GETTERGLNRSMQEAMNKFGPINILILNAGSTEESHKHTIWNLPLDTWEETYQKDSRRIF  
VTIKQFLRSKSSQDAQSGREIKNLAIVVVGSSEPEGHAVHDGVPYDLIQRLKKEITQLN  
RKARINAVIPGGLIEARTQSEKHPKPSQNTSLQLKALVRATTFLASHREAGQLS GECLSV  
GNENEGRLVWRGNETISLSPNLTSQALTIRTVP RSLSSSTGNKIRVAVTIDLDAVSGWLGT  
GYSTENVLADYSAGFFAAQVGVPRLLEMLKRTGIANKVTWFIPGHS AESFPEEVQQVVN  
SGCEIGLHG YAHEGAYSLTVQQERDILERCIDIMTKLTGKRVPGYRAPLYQVRETTDLL  
EEYGFEYDSSLTDHDCQPPFAPRRPPLQPIDYRKPASSWMHPIPDSVSDTSSSGREIVEI  
PCNYYMEDMTPMQFLPHVHNSHG YVDVRSIEQMWKDRFLWVREHENDPIFTIIMHPDT  
SGMAHVIGMVERMIRWLQSWGDEVEFMQAGEMARWWVAANDGDL

>5386\_t gene=5386\_g

MKVSLYTGLAIAAFTGSALAYDIPENVQAFYDKVKNGGSCTGSDLLKGGFYAEEGGSK  
NFGYCQKYFTGKGLYLKGPKTQLADM DIDCDGNQHGLDSRCGSSDDTQSETAFKDQVS  
KFGISDLRADIHPYVVLGNYGSYSPTFDPEHYNIKPLSVVA VVCNNKLIYGIWGD TNGDD  
GPPLVGESSLAVGTACFGDSINGNNGHDGTDVLYIAFAGDHAVPGSSADWKASSYDDFE  
NSIKDLGDQLVASL

>5436\_t gene=5436\_g

MATDPAVARELSRLDPAIPFRASKHLHFTWAKTFYSRPELYIQPQSIEEIQKAVTVARRC  
RRRLVTVSGHSPSDLTCTSAWLINLDFN RVLSVSRDTGLITVEAGIRLCDLGRELHKN  
GLSLPNLGSIDSQSIAGVIATGTHGSSSRHGLLSECIRGLSVTLANGQTVRCSATTNPELFR  
AALVSLGALGIVTEVTLQAVPAFRIEWEQSLHPLSELLDRWDGDLWTSHEFVRAWWLP  
YMDRAIWRATKTNSPVRPPPKSWYGGWLG YHVYHNLLALS NWVPRILPWVEWVFG  
MQYGFKPGTVVTKAVEPGREGLLMDCLYSQFVNEWALPLEKGPEAITRLSAWIHG DQE  
TARIPFSPKGVVWHCPVEVRVSDTTLSSTPRPYLDPTSREGPTLYLNATLYR PYLRDPCCR

ERYYEAFEWLMRDLGGRPHWAKNFTTLASAQDIHEMYGDDMDQWLKVRQELDPDGL  
FVGEWHRRNLLLTSYESKTTDSENALLSLGERREIVRKFGRRGAGDGLEWIGDRRWER  
EPPVSLKETLVADSPSPMTTTTSEESFDLLAHGEASILISDKH

>5445\_t gene=5445\_g

MGSVTSTNGETPQSKLPADFVWGYATASYQIEGAYDEDGRGPSIWDTFSTKTPGKVEDGT  
NGDVACDSYHRTHEDIAILKQYGAKLYRFSLSWPRIIPLGGRNDPINQKGIDFYSKFIDDL  
HAAGIEPFVTLYHWDLPDELFKRYGGPLNKDEFVADYANFARIAFQSFHGKVKHWVTF  
NEPWCTSVLGFNIGKHAPGRTSDRKKNPVGDGAHEPWIAGHSLVAHGTAVDIYRKEF  
KPTQGGEIGITLNGDWAEPWDPEDPEDIEACTRKLEFAISWFADPIYLGRYPDSVVKQIG  
DRLPPLTPDEVALIKGSNDFYGMNHYCANYIRHREGEADPDDTAGNLDHLFEDKFGNSI  
GPETNCEWLRPHPLGFRKLLKWLSDRYDYPKIYVTENGTSIKGENDLALEDLLNDEFRV  
QYYRDYVGAMADAAALDGVNVKKYMAWSLMDNFEWSEGYQSRFGVTYVDYKDNQ  
KRIPKKSALVIGELFNKYISKE

>5462\_t gene=5462\_g

MRFSTVSLAALTVASQALASPVSRRDTEAERANAVKQAFQIAWDGYYAYAFPHDQLHP  
VDNGYDDNYDGGWASAVDAISTAAIMGNQKVVDQILNYIPTIDFKYSNETTISLFETTIR  
YLGGLLAGYDLLSGPAANLVSDKSKVHALLSQAQVLADTLSYAFETPSGVPYNNLLINS  
RSNDGSTTNGLATGSLIIEWTHLADLTGNETYAQLAQKAESYLIHPQPSWAEPFPLVG  
STIDIATGEFTDNYVTWNGGDDSFYEYLIKFFVYDQSRFSEYRDVWLAANSTLKHLLS  
HPAPKPELTFVNIWDNGTFISTSEHLTGFIGGNFLLAGSVLGRQDLIDAGLAFTDSWHAT  
YNSTATKIGPEVFAWDEAGVPADQEAIFYKEAGFYITSADYVLRPEVIESYYYAYRITGDT  
KYQDWAFLAINSTCHVGSYSGIENVNIAGGDGFDNVQESFLFAEVLKYSYMIHA  
EDADWQTKADGLNKVFVFNTEAHPFKIAGPA

>5495\_t gene=5495\_g

MKVLEITAVACLQVVGRAVSHRGSFNVFEYSSGGVEQRALLQDIVTWDNQSLYIH  
GERLMIFSGEVHPFRLPVSSLYIDIFQKIKALGFNTISFYVDWALLEGKPGTYRAQGIFDL  
QPFDAKQAGIYLLARPGPYINAEVSSGGFPGWLQRINGTLRTRDPGYWDATENYAN  
HIGATIAANQITKGGPIILYQPENEYSWGTNGYSDDGQYMQDIMDTARNAGVIIPFISNDA  
GAEGHNAPGSGVGAVDIYGHDSYPLGFDCANPSSWPSGDLPTYFREVHLEQSPSTPYSL  
VEFQGGSFDPWQGGSFENCAALLGPEFENVFYKNNIAAGVAFFNLYMTFGGTNWGNLG  
YPDGYTSYDYGAAISESRSITREKYSQLKLIGNFLKASPSYLDVVPGSASNSTYTSTALT  
VTPLIGRSTKSSFYVVRHSDYTSLDSTSYTLKVPTSAGTLTLPQLGGSLTLNGRDSKIHVT  
DYDVAGTNILYSTAEVFTWKNFSDYKALVVYGGAGEHHELAISSSNAKISVVDGSKSG  
LTTKIQNDQAIHAWDVSSRRIVKVDNLLVFLLDNRNSAYDYWVPQVGNSSSIGFTNEEA  
VASSIIVNAGYLVRYAWLQGSELHLSADFNATTTVEVIGVPTAASSLYINGVLYSHTKTS  
NGFWTASVKYTTPKISLPDFSKLTWKYVDSLPEIKSTYDDSAWVKADHDWTNNTVNPIV  
TPVSLYASDYGFNTGHLLYRGHFVANGNEKTFYVETIGGSGFGSSVWLNGLLGSWAG  
SAANDSAASTYNLPTLTSGSSYTLTILTSNTGLEEDWVVGSETMKTPRGILDFNLSGHNQ  
TDITWKITGNLGGENYVDLTRGPLNEGGLYAERQGWHPSPSSNWQTSSPLDGISQAG  
VGFYSTSFTLGLPEGYDIPLYFTFGDNSGSSYRVQLYVNGYQFGTYVPQLGPQTKFPVPQ  
GILNYQGENWVAITLWAQESSGAKVDSLELTYPVLTALTGIKSSQPAYSKRAGAY

>5514\_t gene=5514\_g

MTNSILLQNGTVLSDGDKVVVLKNHDILIVGNTIHHIGQGIELPEESRVIDCTGKIISPGFI  
DTHHHLWQTQLKGRHGDESFMDYMVSGNIQSYNYSPEIDIFWGQLAGCLQSIDAGVTTV

VDHAHMTYSPDHATEALRATTSSGLRSVFCYSSIWRIKSWSSAVEYDDTLLPDWYDT  
LASLAKSAPYSDGRVTLGVGFDQFQLPKEQVIRLWEKARELGVKIMTTHFAALSMKNSV  
NLLSDYGLLDASILFSHANGISESDAALLTSKGAHVSTTPETEMQMILGDRVAFRNDLKS  
HASIGVDCHANNSSDLLTQLRLGMQSARAAENSQAMAEGKYPGVKIKVEEAFNLGTIQ  
GAKAINMQDQIGSIEVGKRADIVVFDASSPGMVCAAEEDAVGAVVMHASVGDIIHTVIV  
DGVVVRKEEGKLVDIRMLDSLSSTEKGAETTWEKVRSLLESREKIRKRGQGDRQAAM  
NFLYKTFG

>5524\_t gene=5524\_g

MLTSVAALVGLLAFADAAHNHGHHLHRSHNNSDDLLEKRGGSCQFPSDAGLVAVTP  
GSSNAGWAMSPDQSCCKPGNWCPYACPPGQVSMQWNPEATSYTYPLSMDGGLYCDENG  
QISKPFNPKPYCVDGTGTVAVNKAGKPLSFCQTVLPGEESMLIPTLVEDTATLAVPDT  
YWCSTAAHYINPPGTGVEGCIWGTSANPIGNWAYFVAGANTDSSGNTFVKIGYNPVV  
QEPATPFRNTPATFGVEITCDDGAGCNGLPCKIDPSVNALNEVTSSSESADGAGGAGFCV  
TVPKGKTANIVVFEAGSSGSASSSSSSSSSSSTSTSTPTSTAAPTTTSHSSTSSASPT  
SSTPGSTSTPTSSSDSSSDSSSDASSTPSSTPKSASASYAPHVVFETAASGDGGATATS  
AGGSSSSPSASPSSAASPMSTGSMTGLALCLMAGIMMQF

>5529\_t gene=5529\_g

MASRNINFHPDGYHPASLTKTSFDVIIIIGGGPVTSFAEYRLAKAGLSVAVIENELYGGECH  
FFGCIPSKALLRPVEAFEAAKAIDGAREAIGDRKLDVASVFKRRDRFVDLWDDKTWISIS  
NGASGATLVRGFGRIAGLKKVSVQPHGETQKYHLNANVAIIIATGSTHNVAIPGIESLEE  
GTELWSNRDATAANSAPEHLIILGAGPVGSEMATFYSAIGSKVTLISSTAEILPTVEEAAA  
KIVRKSLEASGVSIRLSSRVSKIEKHAPNSITVVLSSGERISGSVLLNATGRRPRTFDLGLD  
SIGLTGEGQPLKTDERLAVPTSQGTEPWLFVAVGDVNLGPTTHMGVYQARIACNVILSSL  
QDKQPSVKISPPIGVAITEAKRSQSTFAQVIFTEPNIGAVGHTLASAQSAGLKVRAVDSDF  
SLAGAWLYGDGQPGWARWVIEEGTDKLVGATFCCVEGSEFVNASQVAVLQGLTLKEM  
VHVVPFPTRGEIWTLLNAAGF

>5545\_t gene=5545\_g

MLDIDDDRAAAALYRPQFLILRRSRWRRYICRLLLLLVALISTTFLFFPSYTNYPHYRSL  
EHTIKRSQESGRGNPRHEKVFIANNLYDGSSELARGKWGSNLELIDLLGESNTFLSIYEN  
DAGDEAGRALAELDQVNCNKSI VEPHYDFSHAENVTLPDASVRLRRVPYLADLRNL  
ALRPLEEQNRKGIQYDKVFLNDVYHDPVDIVHLLFSTNADQNGVSRYRAACAIDFGNL  
IKFYDSFAVRDAHGYPIGVFPFYPWFVSAGAATSRQDVLQKDAVRVRSCWGGIVAFDA  
KYFQTTTTTQEVS KLLRETLADRRKEQPKNITSSPVRFRAISDVFWEAASESLIHADL  
QDSYTNIDQVIDTGIYVNPYIRVSYEYRAFTWLG FVRRFERLFSWPNWIANVFSHHPAHN  
SRRTNIAGETVVQRVWQPDASYDEGGYWKDEARVASRGGFCARRSLFVLKTKRQEDN  
CGWEPIRVPPDPDSLDTL

>5624\_t gene=5624\_g

MAATAGYTPLDAPLFP THEDPVFTDLQWESFLSLCDVVIPALTTEKNPKLSQKRITTEE  
YDSAISITETLKT PDAAQKARQFLEENVSSNPLFKEALRRAFSVYVPQESKNGLSLITL  
LNTRAGSLLL TGSSTPIQNSFEAREKVLNNWLTSRLPQLRQVARSVLLL SKRQWLIFSPT  
SNEIIGFPRVPIYGKPAETFDYQFLQFP PGDGVETIEADVIVGSGCGGVAACKNLAEAG  
HRVVVVEKAYHYPPSSYFPMTQGN AFGHMF EQGGNTITDDGYMAVLAGATWGGGGTV  
NWGASLRTQNYVRQEWADTGLPFFTSSEFSNSLDRVCHRMGVHTEYEQSFQNKVTLEG  
SKKLGYN AQIIPTNSGNTPHYCGHCTLGCHAVGKKGPVASWLVDAAEAGAI FIEGFKAE

KVLFDTVKGKKVITAGVEGEWTSRDTHLGTSGKEATRRKVQIKAKKVIVSCGTLQSPLLL  
MRSGIKNNHLGRNLYLHPVMLAAAVFEEQTQPWEGDCLTTLVTDNFENLDGQGHGVKIE  
NVAMIPSMFLTTMPWSDGLQYKFFVAKMSRMAGFIALTRDKDTGRIFPDITGNPRIDY  
TTSAFDRKHILEGLIVA AKIAYVCGAKEFHSTYRDMRPFIRSNDKNTADADISATDGGIN  
DPEFQEWIREFRKKSPLVAEYGTAAASAHQMGTCTRMSNSPKKGVVDPDGQVWGTEGLY  
VADASVFPSASGVNPMVTNMAITDWTSRKLAKAMNRDKLSQTGGARL

>5629\_t gene=5629\_g

MLPLAKIAVITACASAWPLLHAESKGLSSSSKPLPQFINIFTFGDSYTTTHFDYTGLPNAS  
NPLGNPAFPGITTTNGDNWVGFLISQFNRSLVFDYDFAVAGATIDNSLVPAYESTVPSYD  
QQVSHFLTLNNETEWKSGNTLFTVWFGINDISRGYNASTWSEFSHVLIDRYFNISQTLYD  
NGARNFLFMNVPIQRTPELLAENTTAQATTAYAVSSFNQLLTQGADRFNCKCNKDINAIL  
FNTTSPFDEALDNPTVYGAPDATCYSGDGVSCLWWNDFHPGQAIHKL VAGAVASVTGI

>5638\_t gene=5638\_g

MPYNIAMVSDFFFPQGMPLNENTIEGCGVESHIYQLSTKLIDRGHKVIIITHAYKGRGTGV  
RYLTNGLKVYHVPFLVIYREATMPTLFSFFPIFRNIIVREIQIVHGHASLSSFCCEAILHAR  
TMGLRTVFTDHSFLGFADAGSILTNKLLKFILSDVDHVICVSHSHTCKENTVLRASLDPLMV  
SVIPNAVVAENFRPLSYSTIDGVAGQAPQLTPRIIGPNDTITIVVISRLFYNKGIDLLIAAIR  
ILKSHPNVRFIIGSGPKAIDLEQMLERNMLQDKVAMLGPRHEEVRDVMVQGDYIYLP  
SLTEAFGTVLVEAASCGLYVVCSTRVGGIPEVLPQHMTTFAKPEEDDLVQATGKAIAALR  
SNKVRTERFHDQVKMMYSWTDVARRTERVYNGISGAISELEFYGHYPDAGWDAVRGR  
TRSFALIDRLKRYYGCGIWAGKLFMCVVIDYLLFVLEMLWPRANIDIARSWPKKQVP  
HPDAAAATKGNLTRSTRDLRASA

>5646\_t gene=5646\_g

MHRYSFPRAPVAHPEATVGGAGKHRYFTVLT DGLLRYEWADDGCFEDRASVLALNRR  
LPVPEFRVVESDTSLQIITSRFHLYDKESFAPSGLSAAIKGFYGPHSSTWRYGNPHHTLG  
GTARTLDEIDGRIEFEPGIVARQGFTTLDDSKSMLFDEDGWLA VRQAGNNRVDGYLFAY  
GHDYREAVRAFYALSGPQPLLPRWALGNWWSRYYA YSADEYLELMDTFQEKGIPLSVA  
VLDMDWHIVDEECVAKSGVTGWTGYTWNKKLFPDPPQFLSELHRRGLKTSLNDHPAD  
GVQSYEELYEKMATALGHDS LKDPISFDITNRAFCDAYFDILHRHFDDQGIDLWWVDW  
QQGAHSRIAGIDPLWVLNHFHFLDSARKGKRPLTFSRYAGPGSHRYPVGFSGDVTITWES  
LNFQPEFTATASNIGYGWWSHDIGGHMHGVRDEELLIRWVQYGVFSPILRLHSSNNQW  
NLKEPWMLDVGYERIMTDFLRLRHRLIPYLYTMNVRAAKEGLPLVQPMYWEYPEREEA  
YQFANQFFFSELLVAPITAPQDTKARRSQVRAWFPFGRYVDVFTGIA YDGDRELYLNR  
PLASYPVFACEGAIPLDEASEPANGGNDPSEVLIVVGADGDFELVEDDDQSDQDQGQIS  
LRTAISFRQEAGEIRIGPSTTASRQWSIRLLGCSSLPEQVQVLVNDIENASQTLKVDNGT  
LIRLGLGSEKDIVVKLGRPQLDVHSPTKPIIKFLRDAQIELNLKEEIWKIVSKESPVTVR  
VGQLQALDLDRSVLYPILESLLADSRSAYP

>5648\_t gene=5648\_g

MTVLFKSMLLGLYAPLLVSASAIRHERRSVQQGWSLQSSSCPSGTNSCGGGACCPSSLY  
CFAAQNDEVASCCASDSVCVGA VEGGSKCADSSWSLWKGFGNGFCQVGLVGVYSS  
SGNVAGTCVASASVGSSTAVLVSTGTGSSVTSTTTKSSTTTTSTTTTSTTTTSTTTT  
TTKSTTTSTSSASSTGRAVFAHYMVGTM TAAEAVTDVNDAIAAGFDGFALNTHTISSD  
TWN TDALNYLFTA AAGTSFKLFISFDMSWGLDVSNLAAFLAPFVAQEAYYFVDGKAFIS  
TYTGGTISNSEWSDSFIVPLEQTYGITPYFVPNFGDYSGYPTGVFSAYPILSGVFTWESAW



PAAGTTPANVSDSVDAQALAEAHAAGAVYMMPLSSFQFKYLGSGQDWYRIGEDNLPQ  
RMGQILALQPDFVEVITWNDAGEGHYVGDFWAEQINGSSIGTYADGFDHKGWLQIITPFI  
SAYKAGATEISQITPPNGAPV GALWYRLLTASCSSTISNYQSALDAVNFAVILPSAGYT  
INIYNSQLIGSYPGVAGLNYNSVPGLQVGSQYIQVLDSSSIVVASATGTKSVAAESTSS  
VCNWNYEYVVGLS

>5655\_t gene=5655\_g

MLDMFRRIYESLISPPEVPKAENPLRFLLGASDIAPMALILPARTHPEVVIASVAARDRA  
RAEKYAKKHGIEGIHDTYQDVLNDPSIDCVYIPLPNSHHYEWAIRAIKAGKHVLEKPT  
SNGAEARKLFEHPAVTAPNAPVLEAFHYTFHPAWQNFMLIHHDPLAGPVKSADSYFY  
LPRGYFGKDDIRFRFALSGGCTMDFATYCVSHVRAMLGDSHPVVESVEFRKLSESEHRG  
KTAEDLEQIDEAVTATFRSKTGAVGRLFADFSLTGSILGFKVPGLGWPKVAAELEEKEVS  
EEEVKLGDGEKHFVQRTVTLYNHIAPVVYHSIVVEDQHSIRLDGTTTVKSWENKNTIKA  
YDWPDKSDGRPGGTSWSTYRYQLEEFVNRVRGRKGTGVWVEHQSSVDQMDVLDDMY  
KKGGLKIRPSRNIDLED

>5666\_t gene=5666\_g

MIIDAFPLFLGLATLANAQFDGSRYA WYTSPATDFNSALPIGNRGLGGLMYCTPTERISL  
NENSIWSGPFLNRLNPNSHGVINEVRSLLQSGNITGAGQVALPNMAGNPTSPQQYNPLG  
QLNLDFGHSSQGSRLERWLDTYQGNAGCSYLYNGVNYTREIGNYPTGVLAMRLQSSQS  
GKLVNINISLARQQFVTSNTASSNGINSVTMKANSNTNPISFTAQAQIVTSGGTVSAGG  
STVTVSGATTVDIYFDAETSYRYSSESAWEAELARKLASASSQGYPALRTAAIADNTALT  
GRVSLNLGNSAGSASSLPTDQRLSNYKNNPGNDVQLVTLMYNFRHVLVASSRDTGAL  
SLPANLQGIWNEDFSPWGSKYTININLEMNYWHAETTNLAEETKPFWDLLAVAQGRG  
QLAASNMYGCGGFVLHHTDVGDPAPVDYGTPTIWPMMGAWLSTHLMHYRFTG  
NKTFLQETA WPILQSAAEFYFCYTFMWDGYTYTGPSLSPENPFIVPSNESTAGSAEGIDIS  
PTMDSNLLYQIFTDVIEACKVLQISSADCSQAQSYLAKIKPPQIGSYGQILEWRQEYVEEQ  
PGMRHLSPLFGLYPGSQMTPTVSQSLANAAGVLLNHRMQNGSGDTGWSRAWVIACYA  
RLLNGNSAWSSVQAFLQTFPLTNLFNSNDGPPMQIDGNFGFTAGVTELFQSHGNIVHIL  
PALSSVPTGSVTGLVARGGFVVDIQWANGALVSATITSKLGNTLALS VGNQTFVNG  
VTYSAPFGTSVGGTYKITLGTGSTTTTPTSSITTSSTSFQTSTSTSTSSGPGTGV AQHW  
GQCGGQGWGTPTSCVAPYTCQVENPYYSQCL

>5672\_t gene=5672\_g

MAPIQYLLCFLLLGYAAAQLSGTVGPLTSISAKKSVALCNVLDYGA VADNSTDLGPALT  
DAFEACIGGGLVYVPSGNYLDDTWVTLSSGSAWALQLDGHYRGGIDGGNMIYIEHATD  
FELFSSTSKGAVQGSGLFHKDGDISGPRILRLYEVTDFSVHDIALDSPSFHFSMDTCTN  
GEVYNMAIRGGNEGGLDGIDVWSDNIWVHDVEVTNKDECVTVKSPAHNILVEDIYCNW  
SGGCAFGSLALDTDISDVIYRNIYTWSSNQMMMIKSNEGSGTVENVVFENFIGHGNAYS  
LDIDSYWSSQTAAGGEGVTLTNITFTDWHGTEANGALRGPVRVVCPTDNPCTDITIENFA  
MWTETGDTQWYLCESAYGSGFCLKSDSDSLTSYTTTTTTVSTAPTGYSAATMAADLTTA  
FGTTASIPITPTSFPPGATPISSLA AVIYG

>5690\_t gene=5690\_g

MSEAVNMHRGVSQGIRIILALCLLLFCARGILAQGC SKENPCATGCCSKDGYCGTTEEHC  
GAGNTFGFCGLGPDFCGAEVCVAGCDKSECDPGWGS DWSKSSKCLNVCCSKYGFCG  
VTKDFCGDKTVNRGNCPEDGSLKRVVGYFEGWASRRSCNRFWPEKIPSRVYSHINFAFA  
TVDPDSFEIRPAHARDVSLYTRVTTWKQMDPNLKV FIAIGGWTFNPNPGPTQTLFSNLAAS

EDKQKAFFKSLISFMSTYDFDGIDLDWKYPEAEDRSRSEDFAFNPFLANLKSTLDKTP  
GRNGISITLPASYWRLQHFDLQALAKSVSYFNIMSVDLHGTWDKGNKWTGEYLNHTN  
LTEIDLALDLLWRNDIEKDKVVMGMFAFYGRSYTVPDSCVEPGCTYLSGGTKGRCSREIG  
ILLNNEIDQIRNSKGVSPILYKDAAVQVLHWDDQWVSYDDADTFLKTNFARKRCLGG  
VMIWAMSHDTSNYYSKALGKVTGYVGPVQFDYDDGTITDKTNHSQCYWANCGEACP  
SGWALVPRTDQWKSTEDDYMFDSTCMGTGSRAFCCPPGNTPTCGWYSFKGGRCCEGG  
CPNGMQEIGSTKTGCRYDSYQSACCSLFDKDGRLVDGMMLYGTCTRWGPTPQCEAGVC  
NSAVSTVLGKSGTESGETYCHDTTHRENVFPALQLGEQHYCCNTNAPELRWQNCERVS  
HVGITTQDMDCVGFPCAGKVKVAMKTYNHGCYNRGYESYCCPEPSYYTETRLSDDVA  
AFQDALESYGANSTCSTTNLTSRD

>5691\_t gene=5691\_g

MRSVLFFLSIAVQTLTAVASGGHHQHKHVINHRQALDTPESVVGVPVPTATTSSTAQPS  
PTNADISDAVDKVDRALAVLAVINKERYSQPRYNNYEFADAQAVVGEKVTAPPLDYNA  
DAADRISTRSSWKRNSGHNSQLAYWIPPELAEAARVIAEASPTPTSTGDESELARQA  
RAKYFAPSNDTNVPLQTYRRPDGLYKYANVSNDQILLGIAPAAGLTKRDTSSQYWLS  
MQQQGSSPYAPTGYQVFRNVKDFGAKGDGVTDDTAANKAISDGNRCGADCGSSTVYP  
AVVFFPPGTYLVSSPIIYYNTQFLGDPGGYPTILAAASFIGLVITSDVYVGDQEEWYIN  
TNNFLRNVRNFKMDITRTPDAYVCAIHWQVARGTTLENIEFYMSQAEGNTQQGIYME  
NGSGGFMSNLTFVGGNFGAYLGNQQFTTSQLVFVQCKTAMQVRLDWAWTMQDIIIESC  
GTGVIVIGGAGGPLSTGQGVGSLTLVDAIIANTPTGIITSLYQDNSTFLLQNVGFFNVQQ  
AIVAETITAPILAGGDEVLVDSWGLGMYANSSGTFFAQQSNLATMNRNAELVGSKAYV  
KPNFFTRRRRPQYYDLQGSQVFDVRSYGAKGDGNTDDTVVLNSILDVAANLSAIVYFPYG  
IYVIHDTLNPKNRIIGQAWPQIMAKGSKFQDINAPHVAVRVGSPPGDVIAEIQNLLFTV  
SGPTAGTILMEWNIHESVQGSVGLWDSHFRVGGAKGSQLOSSECPKQASAINHNCAAS  
LVLHITPSASAYMENVVWWTADHDLDIASQDQIDVYSGRGILIESQGPTWLYGTASEHN  
VLYQYQVSNAKNLVMGMMQTESPYFQPAPKAPVPPVGLFPNDPTFSECSSSLNCAVS  
WAVRVIESSTIYMLGSGMYSWFSAYSQYCLTTDDCQDRGFYIEESNDVWIFNLVTKAIR  
ESISQGETPLYAKDTKNGYTSSLLGWFRPTEVIGERNFTGYLYSSPNSDDLKVSST  
CKTAMTRLIECADETYSFLQPAWPQAYANDTLADICDSRCELSIKTWYDDVTTYCSQFD  
TKEDVMNYRGGILWAGWNQTLKDPDSGSYCGDVMQKFTA VDFGRDMPESSEMCSYC  
YMTTLQLAQASPYSFYDEYYQGVLETVHSRCGVVGSTDIPPAVEDHTEEPTEFCASKTY  
TTVEGDTCDISALAKSVSSVALFIGSDTIRKCTNIIAGLSICLPFECESVYSFSSSETCTSIEQ  
VLGMEPGKLRQLNPWINGGCTNLQDWSVTYGHVLCVSPQGGTYTETVPPRGVTSIPSS  
NGYAFSITLPPENAAVANGTTTSCGRWHVPVDGDTCASICVQENINFLFLAVNPSLSAN  
NCTAELLAETAYCCGPVQGWGLTPPSPPMTTIPDLISSSTISSTGV

>5705\_t gene=5705\_g

MTYELTFTYNYTNFFDQFSFFTASDPHTGFVQYVNANTAQALGLAQIVNNTQTYIGVDN  
LTTLNYPGGDPPTDRIANGRKSIRLESRQTFDQGVLIADFAHLPSSVCGTWPAYWYTDH  
AEDPYGEVDIIEGANNQIGDIMSLHTSAACTLNVDPQSQTGTDVRTDCSLATNYVDGCG  
VSGQSNSYGDPFNAQGGGVWALWLDNDDLAVWMPRLSIPDDIAHGKELTLKTWGKP  
LLHFKSQTGCRVMDQWKNQTIIFNIDFCGENAGGSNWNWSPASPSASQSCADITGVSSCEA  
YAAANPQAYSNSYFLINEVKVYRSWSQVAINEGYSAGVASTRPSLGHVVVVLVVGWAL  
VARWFSCLV

>5717\_t gene=5717\_g

MKARIFSSLAALPLAVAAIVPSLPKTFNSVTIFDPPSDYNIPRTLYARTVQLPNGDLLATW  
ENYSPEPPIVYFPIYRSSDLGKTWSSLKVVQDTANGVGLRYQPFLYYLDERIGSFGPGTLL  
LAGNSIPTNLSTTQIDLYASRDSGKTWQFLSHIASGGEAIPDNGLTPVWEPFLLAHNGRLI  
CYYSDQRENATYQKLVHQVSTDLKSWGPVNDVTDYDTPDRPGMPVITKLPNGQFL  
MTYEHGSFFGTSSYSFPVTKLSTDPENFATASGIQMVVSNGATPDGSPYVWSSYGSS  
NGTIIVSSGGSSSVVNQALGAGNWTEIPTPESTS YTRSLRILQENENYLLLNGGGVLSGT  
SNRVTVSLIDLENTVI

>5730\_t gene=5730\_g

MSLFVLGFLYALQLIEAKRCIVYLTGQHDVIPNIDL VQGITHVIMAFMHSSAFNVPGATE  
WPLFSTVEEVRSKFPVSTAVMIAIGGWGDTEGFSKAAATHSSRELFAQNVREMIKDTGA  
DGDVIDWEYPGGNGDDYKRICNSEKAWEIDAYPKLLAEIRNELGPKKLISAAVPLQRD  
MLAFTEANLHQLAEYLDLFLNIMTYDLMNRRDNVTRHHTGVQLSREGLESYLHYGIAPL  
KANLGFAYVKWFKTDPEDDSRCLSQEGVGCKTMLLEDPTGADLGRSGSFSWHDVPV  
PELAASFSKAMKLSYDSHGGGHFFWDQENIFWTWDTSDAIHRKFPLLVNELGLGGVF  
AWGLGEDAPEFKHLRALTEAVDSSSKVVHSSATPNKQSKAPVQWRDEL

>5741\_t gene=5741\_g

MTRLIFGSVLLAALTACAIKPAEPAITPAPNLLDKRATSCTFSGSSGASSASVSQKSCS  
TIILSNVAVPSGKTLDLSSLPDDTTVIFEGETTWGYEEWSGPLLQISGTGITVKGASGAYL  
NPDGARWWDGEGSNGGKTKPKFFYAHSLTDSITNL YIENTPVQAVSISGCDGLTITDM  
TINNSAGDEGGHNTDGFDIGSSTNVVITGANVYNQDDCVAVNSGTEITFSGGVCSGGH  
GLSIGSVGGRSDNTVDTVTFENCEVKNSVNGIRIKATEGDTGTITGVTYNEITLSDISAYGI  
IIEQNYDGGDL DGGTASSGIPITDLTIENISGSGAVESSGYNIVITCGSGACSSWTWKDVV  
VTGGKDYGSCTNVPSVATCST

>5750\_t gene=5750\_g

MFSKQGQRLVYTYDAEQLWIEPWGTNALRVRATKQAEMPLEN WALQMEVEAQSEATI  
TIDEKQASIVNGGIRAMISAAGKLT IYNHLTNKLLLEEYARNRNDLLDPKCSSLAIEAREF  
APILGGDYKLTQRFESLDRNEKIFGMGQYQPNLDL KGLDLELAHRNSQASVPFAISSLG  
YGFLWNNPAVGRATFGKHIMSFEAYYTKALDYWVVASDSGPAAIVEAYATVTGKVP  
MPEYGLGFWQCKLRYQTQEELLE VAREYRRRDLPIDLIVIDFFHWPLQGEWKFDPTYWP  
DPDAMVRELKELNIELMVS IWPTVDKRSENEEMVAEGLLVRTDRGIRTTMNLEGETV  
HYDATNPRARDYVWNKSKLNYYDKGIHVFWLDEAEPEYNVYDFDNRYHLGPNVAIG  
NIYPLCYARTFYDGMTAAGQSKV VNLRCAWAGSQRYGALVWSGDIASSWISYRNQLA  
AGLNMGLAGIPWWTDDIGGFHGGNPNDSEFREL FVRWFQWGTFCPVMRLHGDREPRQP  
QVGTGATLCSGAANEVWSYGETVYD ICVKYMRIREKLRDYTRSLMEAAHERGTPIM  
RPCFYDFSQDALSWELEDQYMYGPKYL VAPVLNPGQTSRTVYLP PGTWTLFESSETFEG  
GKNVEVSCNLDIIPV FVRE

>5754\_t gene=5754\_g

MGSGSHSPGDIVIQLWPPGLSLQISLDDQCAPCIDHVL PAGDKLPINVS PHFASSKIPLNGV  
RVAGQGHTTSKTARAMVGGV LSSRLRYQH HVERKDGF TFLDIVSRDNILGIEATHTLQ  
VFAGIPVLRSWTTLRNRSSGSMTIMQASSLSIGGLTNGTRSWSENYSVWIAHNTWFREA  
QWQKNSLADV GIDVGLFELNDGHRATMAHYSVSNQGS LSTETHLPIGAVTREDGLDT  
WLWQIEHNGSWRWEIGDWQDGLYMAASGPTQVDHAW EALLRPDET FVSVVALCHV  
VDSLNTAFATLTDYRRCLLRPH TDYERLPIIFNDYMNCLMGDPTEEKIQALLEPVRGCGA  
EYFVIDAGWYADDKNWDDVGA WEPSQKRFP SGFKVLLDGIRAKGMIPGLWLEPEVV

GTRSVVAKQLPSSAFFQQRGQRVEERGRYQLNFSQCVVREHLDRIVDHLVRDFGVGYF  
KFDYNIDVTTGTDADVTRGVSTGAAHLAHHRAYLQWVRDVLNRHDGLVIENCSSGAQ  
RIDYAMLSVHTLQSTSDQQNPLLYAAIAAACPTAVVPEQGASWAYPQRRWSDETNAV  
MINSLLGRVHLSGRLDDLEPTQFELVRQAIQVYRDVIRAKLRTARPFWPLGLPRWHDEW  
IALGLAAGDGTVLLSIWRRSGPIKCFLPLSTQHRNLRTVSLLPKAFKFEARVEVVEGGLSIE  
LPAVPCARLLQLLP

>5756\_t gene=5756\_g

MEKEENRPQEGNGHGRIVSPYSTGSRARNTROYGLFWGRFTLASTPPRVQWPDAEFQY  
MSIRSGGFQLTKERKYKVNNTYKNITVSGISVYGIDVQQDYLNNGPTGKPTNGVTISDV  
QFVEVTGTANSSAQDYILCGDGCSDFTFSGVSITGGGVANSCNYPSAGCP

>3371\_t gene=3371\_g

MNKLVDVIIVGGGPVGLFLACELGLARASVLVLEQDTKLENPFKDAPLGFGRMNTPSVE  
SLYRRGLLGEFIDLKRALGPENTAGFQFGGHFGGIGLNANKLELDRWKYRPLPGPLMP  
TPTTLQQVEMVLNKQAEKLGVTVLRGHGVQNITAQDDKSVTVEAGESPRLFTGKWLVG  
CDGGRSAIRRVAGFDKGTAAKFTGYAFQCELDHPEKLPGFNPTENGMYSIRQNSMH  
LDFDGDGAYDRQTITREHLQEVFNRTGITDLKIKKVHHASSYTDRCMQVTTYRKGR  
LLAGDAAHHSPLGAQGLNLGLDALNLGWKLAATIRQEASNDNAPVNLDLLDTYETE  
RHPIAAWALDWTRAQVSILQPGPFGRANRNLISEIIDTTDGTNMFLDRFWGLTGRYNLD  
ANDGKTVHPLVGSSVPDFEFEDGSRLGSKMAAGRGLIIDFGDHVALKELGEGQFGSRVD  
YLNLSAKDRRGLGAVIVRDPGFAAWAIEDDEKPDIDAAKAALEKWFAF

>3375\_t gene=3375\_g

MPYIEVNQKRLNYSDSHPNGPPAGGLTYIFIHGLGSSQNYGGVIPHLTPHHRCIAIDTYG  
SGRSAFTGLSQSIDTIADDVVKVMDGLKVSCTVLVGHSMGGTTVLQCAAQYSDRVDAV  
VAIGPVHPTASTGQVFEKRIQIVSEDMPEMANTIPNAATGSKATALQKAFIRELIFSOPP  
EGYISLCHVISEATAPDYAAIKAPLLIAGAEDKAAPLEGCKHIIANVSSSMKTLDILPGVG  
HWHCIEASDEVGNLIMKFTR

>3386\_t gene=3386\_g

MDSNPAPPTATDIFRYRYQHGTNLGSIFVLEKWLHPKMFDKDSKGSSELEATKQSLKKN  
GLLVTRQKWEHHWQSALTEADLIWLTDTAKCNSIRLPIGYFTLGPFCCKGTPFEGEPSQV  
YINAWSAVKKIKDCQDHGIGVLIDLHALPGGANINAHSGTNTGKAELWTSEYYLKVSK  
DCIKFVLQEILSDRLPNVIGVELCNEPSRAASSAVFKWYDDVLATVRTVDSSIPIYIGDCW  
DLPTAIKYALKKNNLEDASNPVIVDTHKYYTFAAHDHAQAPQQIIEVKNSLDDIVKNQ  
GHIASRKALAVYIGEYSCTMDGKTWSKVDAHRPALTQQFGRTQTKKWQDVTSGSAF  
WTLKMSWMDGGDWGFKKQVKTGAVTPPSSLTFSFDEIRSKCREAKACEQQLRAAALT  
QHANYWDQSSSTKYEHWRFERGWCLGFDDAMAFLCSHLDGNLPITRQVEGGDKIGA  
LELWIGKRMVEAGQLNSLMGWEWEHGYRQGVKDFEKVIYT

>3392\_t gene=3392\_g

MRSVRTIYLLCFITIAALTLFFLRNPDTDTGPKAPFDKSLPADFETLLQPTTEDSHPIARLIN  
DANTKFDEKIARQSKTLAEAVEEYRRRYGMPPPHFDKWFSFAKKRGVQLIDEYDTIYH  
SLLPFWALSPPVIRSRVHEALGYDNALIGLLIRDGRVTKVEGGGDGYQWQREATVGMLE  
RFLKYLPMDFLAFNIHDEPRVVPHDDLQRLISYAKDTPVATFEKTSLNKWSRPADL  
NKGDRIEEVRTTRFNRFHQPTWTHSRLSCPVDSPARSLDENVADNMEPYATSDLGFIY  
NTTAFSDICLSPSLRKTFFGFFDRPNFNIHDLFPFISQSKISSFQDILYPSWPYWGKVTYN  
ASRDYVWEDKIDQMYWRGSTTGGFSRDGGWRRQHRQLFVKNINSAGDASIFTQMEDG

RWITSNVSQRQDVKSLFNVTFTYVGCQDPGDCRAQEEYFDISPSVDQQDAWAYKYLLDID  
GNAFSGRYHAFLRSNSLIYKMAVFREWQDEWIDAWVHYVPLGMKGTDTVESVRYFAH  
EEEGKIQAPRLAKQGKEWAQKVLNRNEDLEVWFFRLLLEYGRLIDDDRENIGYIP

>3394\_t gene=3394\_g

MATPGEA VYCTLLTSDQYLP GAVVLAHSLRDNGTRARIVALFTPETLKESTVRELRTVY  
DEIIPVQLHSNGTPANLLMDRLDLISTFTKIELWRQTQYSRIVYMDADVLALRAPDELLS  
LEEDFAAAPDIGNWPDIFNSGVMVLRPNLQDYIALRALAERGTSTFDGGDQGLLNTYFKR  
WHRLSFTYNCTPSGNYQYMPAYRHFESTISLIHFIPQKPKWQSRHAFTSGTPYYQLLGR  
WWAQYDRHYRPLPTSLPPAPARVSFQSQPSYDASYTPRSTSSYTSSWKESSFPAQGVHTT  
HQHEYHHHAPSTYHERPAQTAGDLHLRRSPISDGFVDTTAFAPAPAPALAHQPPIHPPS  
ITRDLRGHQAPVEAAAEIRSVVPLYVHGEEQSSVYVTVPSGGTDNFTELKAQYITQKAFE  
PYHQHHTSVETAPKAQPKAPSPPPPPKPEERPFSPRAEWDASREPPRHSRPEASSLE  
TQTYTMSEDTHLFRPPSYPEAPKNMWYEVPSAKREPQLAPIFPWETRASKPTRVFAEE  
ETFGPSISDVIEHERHPEQTLSTQTETSHFEHIERTEHTEQTQTKQPEQPEQLPKGTATSF  
EYTPNFTP AESWETFSRGNAWDEVSEINKYVDAIQQRSKKANRGGNASGAKRPGSLK  
ITDFPTEIDRPSLPVTPAPMRRTFWGDQDQGESSEFPAAEGVNPQGDWNPLDRLEELRQ  
RQLNLFMTTSPQGPTESSEDETEQPSEADK

>3425\_t gene=3425\_g

MRNSLLISLAAAALAEKGAYSPPAYPAPWASGAGEWAQAHDRAVEFVSQTLAEKINL  
TTGVGWEGGQC VGNTGSIPRLGFRSLCMQDSPLGVRD TDYNTAFPAGVNVAATWDLN  
LAYQRGVAMAEHRGKGV DVQLGPVAGPLGRAPEGGRNWEGFAPDPVLTGQMMASTI  
QGMQDTGVIACAKHYIGYEQE HFRQGSQENYTVADAISSNIDDVTLHEL YLWPFADAV  
RAGVGSIMCSYNQLNNSYSCNSYSLNHILKGELDFQGFVMTDWSAQHSGVGDALAGA  
DMDMPGDVAFDSGTAFWGTNL TIAVLNGTVPEWRIDDMAVRIMSAFYK VGRDRTQVPI  
NFASWTLDTY GNEYYYAGEGYKEINQHVDVRGDHAKVVREIGSASIVLLKNVDGALPL  
TGSERFVA VFGEDAGSNPDGVNGCSDRGC DNGLTAMGWGSGTANFPYLV TPEQAIQAE  
VLKNGGTFTAITDSGATNTTATTVAGQASACIVFANADSGEGYITVDGNV GDRKNLTL  
WQNGEAMISAVAGNCNNTIVVLHTVGPV LVEDWVNHPNITAVLWAGLPGEQSGNSLV  
DVL YGSVNP GGKTPFTWGKQRSDWGT DILYEPNNGDGAPQQDFTEGIFIDYRHFDK YNI  
TPTYEFGYGLSYSTFSFNLQVTPLAASPYK PATGKSGPAPVLGKVLNATAYLFPSSIKRI  
EAFIYPWLNSTDLRTSSGDPNYGWSTSKYVPDGAQD GSPQVNPAGGAPGGNPALYDP  
VAEISVTVKNTGKVAGIEVPQLYVSLGGPSDAPKVL RGFGRSLSLGAGEEAQWTTTLTRR  
DVSNWDTVSNQNWVVSNYTKTVYVGNSSRNLPLQKTLALKIGK

>3438\_t gene=3438\_g

MVLHQLFSK SASPKDKKDKERKAKPREDSSPRKDTKSRGRPQSSDLSLDLDGITI  
PAPDSPPTFSPSSLSSSPQKSASSSPRKSSPTKTTLPFQNL RPPHSRSSSTTTSKPAFFSSNR  
NSRSEDSHPLNLPPDELRRHLSAMAAARD DGMRSSMDIDRDTTASPQPEATPMSTNGTQ  
NGDTRD RSPTPPHRSPPNSDGGESHKLAGNKFYKQGDYERAIQEY NKALEVNPNSSIFL  
SNRAAAFLSANRFIEALDDAQRALDLPENSKIMHRLARIL TSLGRPAEALDVL SKVQPP  
ASAKDRANAETMLRHITQAEDSLNNGKGGSLVVF AIEQARQMLGPGVKTPRKWQLMA  
GEAQLKIGSDNGFGKAHDVAISLLRENNQDPDALLLRAKAYYGQGDNEQAVKYTRMSL  
QLDPDNKKAFTLLRLVQKLVRTKEEGNAAFKAKDYKRAVELYTQGLEIDPTNKDTNSK  
LLQNRAQAHIALKDYEKAIEDCTEALRLDPGYTKAQKIRAKAHGAAGNWQEAIKDYKN  
VAEVPNSEKGIQEDIRHAEFELKKSQRKDYYKILGVEKDASDGEIKKAYKMAILHHPD

KNPNSSDEKFKELGEAYETLIDPQKRASYDNGDDLIDPSEMFRGGSPFGGMGGMGGM  
GGMGGMGGMHGVNIDPNILFNMMNGGGGGGGGFAHAGGNPFAGAQRGGGFQGFQF  
>3473\_t gene=3473\_g

MHWRNLVPLTICSTAIAAAASKGGVSQKDNVCTVTALGGKRDDVPNILEAFSRCGKD  
GTIVFPKDQNYWIATRLNPVVSNNVIDWRGVWTFSDDLNYWRNHSYPITFQNHAGFV  
LTGDHITIKGHGTGQIYGNGNAWYNVEQAVTQPGRPMPFVFWNVSEVLVEDFTVKDPP  
LWSL NIMNGTNMVFNNITCNATAVNAPYGSNWVQNTDGFDTMDANNIELNGFTYQGG  
DDCVAIKPRSYNVRVSNVLCHGGNGIAIGSLGQYLEDASVKNVVIDNVNIVSYNKDMH  
NSAYIKTYMGGRLVQSSYESAGLPNGGGWGTVENILFSNFVQASAGPAITQDSGDNG  
TFKGTSLMAISNIAFVNFTGYLNGASHAASVSCSNVHPCYNIDFQNVPELLPSQNTTVYGN  
GTCSYTESGGVHGLAGC

>3474\_t gene=3474\_g

MVLLRKISLVHVWTLALSAAAEASSCWRNTTCTGPTDASFGAWEKNIYAPPSRLVRPQ  
SILETSDSRTDFKVGSGHNVLRGNGSQIVDFGIEVGGIISVNYTATAAGSALNLAFAEAK  
NWIGKFSDDSSNGAFKQGDGYLTYNITEAGKGVY TIPDNKLRGGFRYLTVFVTGNATLDV  
NDITLEIGFLPTWSNLRAYQGYFHSNDELLNRIWYSGAYTIQTNMVPVNTGRQIPAVAY  
GWDNNATLPGDTHVDGAKRDRAVWPGDMGIAVPATFVSIGDLESVKNGLQVMYNTQ  
ASTGAFAESGPPLSQKGSPTYHMWSMIGTYNYVLFTNDTDFLQLNWAKYQLAMDYIY  
GKVGSSGLLNVGTTRDWARWQQGFNNSEAMILYHTLNTGAQLAEWAGD TTGLSSN  
WTERAKNLAVAVNADCFDDAYGAFKDNATATTLHPQDANSMSILFGLVDEDRVQGISQ  
RLTENWTPIGAVAPELPENISPFISSFEIQAHFVAGRPDRALDLIRRSWGWYINNPNGTEST  
VIEGYLQNA TFEYRSSRGYYYDASYISHAHGWSAGPTSALINYVLGLSLTGRAGSTWQL  
APQFGDLTSVQGGFTSSLGQFQASWSRGSTKSSSSYELSFKVPTDTQGTVVLPVNGKKS  
KVTLNGKKIQWGS EDTSTISITKGGSYKITVRS

>3532\_t gene=3532\_g

MSGLRSVVYFVNWAIYGRNHNPDLPADKLTHVLYSFANVRPESGEVYLTDSWADTD  
KHYP TDSWNDQGTNAYGCIKQLYLLKRQNRKLV LISIGGW TYSANFAQ PASTEAGRE  
TFAKTATKLVLDLGLDGDIDWEYPQDDAQNFVALLRKRETLDQAAGPNRRFLTI  
ACPAGASNYQKLRLPEMTPYVDFYNLMGYDYAGSWDQVAGHQANLFP SNQNASATPF  
STVGALDYIYKISAGVPPSKMVLGMPLYGRAFNQTQGP GTSYNGVGEGSWEQGVWDYK  
ALPRPGGSDQVDTEIGASWCYDGN TMVSYDNVQVGEIKANFIRN NGLGGGMW WESSG  
DKGGSAAAKADGSLIGTFVDTVGGV GALDQSPNNLDFPESKFDNIRTGMQGA

>3542\_t gene=3542\_g

MVQSRVTALGAFPNEHPEIKCTLPSSSEYAKDREIFLLSRKANPLAIAHPESA EQVKALVK  
FVRDNGIKFTVRGGGHN LQGLCIEGTLTIDMRAFTSVKIAADRKTATVGAGILQGGQLG  
KILCKEGLATPTGAIPSVGYLGWAMYGGYGPSSNWGLGVDQIVAATVLDASGAIAEA  
DTLLKSIRGAGGAFGIILDVTIKVYHLKALFAGAIYDSQDMEKAFIEYNAGYRKLREG  
IPKELTIQPMVFNSPQGR LFCVAFTWSS EDEGRWSEKVASLTA VLMNTVA VTTISDW  
FDGNAALIPTNAYGQFRTHNLHEITPEAAECLGRHLAKMPSDLCTMFSIHQSRMTTSVPI  
SDSVFAVREPHFMLEIIGCATTEEKSAESEQWALDLWNDVGEIEKKNVLDGAYISLHYA  
EEPQLSTLSRYFGPHVDDILATKKRYDPENVFDFTVPRLG SYI

>3554\_t gene=3554\_g

MASNSAFASGRDQKPDIRRRNVGEATKSDNVPTISISDTKGVAKNHSFLDVLDEWEFVIA  
PIIFTALSFFTRMYRIGLSNIVTWDEAHFGKFGSHYLRKREFYFDVHPPLGKILVGLSGYLA

GYNGSFEEKSGERYPEDVNYTFMRVFNAFFGAVCVPLAYYTARELNFRRPTVWLVTLM  
VLFENSYATISRFILLDSMLLCFTFTTVLCWARFHRLRNQSFSVEWFAWLFLTGVSIGCV  
CSIKLVGLFCTALVGLHTAEDLWNKFGDVKMPVTTLARHVIVVCLIIVPLLVMFSF  
YLHFLILENTGPGDAQMSSLFQANLKGTEVGRDSPLEVAIGSKVTLKNMGYGGLLHSH  
VQTYPEGSTQQQVTCYHHKDANNDWFMYPNRYQQEYDPESPLRFLGDGDVIRLIHAQT  
GRNLHSHSVAAPITKSDWEVSCYGNTTIGDEKDHWKIEVVSDAASRDKSKIRTLTTAFRL  
RHEALGCYL RAGTVNLPQWGFKQIETTCVKENKPRDVYTHWNVETHVNERLPPGDPGS  
YKSPFFKDFIHLNVAMMSTSNALVPDPDKQDDLASKFWQWPLLHVGLRMCSDWNIV  
KYFLLGNPLVYWGSTASLLGFLIFAWYLIRWQRGYVDLSPSEIDQIHYAGIYPVIGWVL  
HYLPFVVMARVTYVHHYYPALYFAILTAGFCVDWVTRKLSTKVQWAIYIPLYVAIALFI  
VFKDIVFGMEGSNRQWQYLKWLSTWRISD

>3600\_t gene=3600\_g

MLSRSTRLQAVARLYTAQSKRQFSSSTLLKVELAYQLIEPSAQDKKRNQPIVFMHGFM  
GNKLNRSISKYELHFRALLWKQEVLLTVDRALARDLNRDIYVDLRNHGDSPHAPEH  
TYTHLAEDVSDFIKQHHLGKTVLIGHSMGAKAAMVLALQSPDTVAALIPVDNAPVSAM  
LGSPFNDYVKGMDIFEAHVTKQSEADKILAKYEPSVGIRQFLLTNLIRDPSTDNKTLKF  
RVPLDTLGSNLGEMADFPWKFDRENAANNADLPTYTGPTLVVRGLQSKYVSEKRLPAV  
KHFFPNAQVAGIDAGHWVISEKPEEFRQAVIKFFRENDIE

>3655\_t gene=3655\_g

MPAVIDAQSASWSAAYSKATAAAMSKLSQNDKIGMVTGVGWGKGPCVGNTAAPSGISYP  
SLCVQDSPLGVRYANPVTAFAPAGTNAAGLTWDRITLMNQRGAAIGAESKGLGVNVQLGPV  
AGPLGKIAQGGRGWEGFGTDPYLSGVAMIEITITGMQSSGTQACAKHFIGNEQELNRESM  
SANIDDRTLHELILYWPFAVAVRANVASVMCSYNQINGSFSCENEASMTGILKQELGFPG  
YIMSDWDAQHHTVTSANGLDMTMPGSDYSDTPSSVLWGQNLANAISGQVAQSRLDD  
MVTRILAAWYLVGQDQGYPAVAFDSWTGGQASVNVTSNHNVARAVARDSIVLLKNT  
NGTLPLKKPSSIAIIGTDAQTNPSGPNACTDRGCDTGTLAMGWGSGTCQFPYLTDPLTAI  
KTQAASDGTITTSISDDGSAGASVAQSAEY AIVFINSDSGEGYITVEGVAGDRNNLDPW  
HSGNALVQAVAAVNKNTIVVIHSGVPVILETILAQPNVAVVWAGIPGQESGALTDILY  
GSTAPSGKLTYYTIKQASDYGTAVVSGNDNYPEGLFIDYRHFNDANIQPRYEFYGLSYT  
TFGYTNLAIDITVSTGPTTGQTVPGGSDLFESVGTVTVQVNTNGSVAGSEVAQLYIGLPS  
SAPSSPPKQLRGFDKLSLAAGASGTATFELTRRDLSYWNVSQQKVVVPSGAFTIYVGAS  
SRDIRLQGTFTPGGSSTTSTITSSKTSTTTSTSVTTSTSVTTSSSTTIKTTTTSTTSSAGPTQ  
TPYGQCGGQGWAGPTVCPGWTY

>3657\_t gene=3657\_g

MVFLKVASSLLLAAYVSGAPTTTESPGSLVGDGLLVNTSSGPIQGFFNQAPDVRQFLGI  
PFAEPPVGDLRFEKPKKSPNGTVNAFTLPNSCMQQFNSSSTIYTEYETGFLISGGNSED  
CLYLSIWAPRVENIREQQRPLPVLLYIPGGGFTSGGEASLYKVPDKWIQRTQDHIVIMN  
YRVNVFGFPNAKGLTDQNAQLLDQRLAVEWVQENIGQFGGDPARITLWQSAGAASVS  
IYPYGYRDDPIVSGLIADSGGPTIITNKDVAQTNFTSLAALVGCNSSNVTELLKCVKQVPA  
QTLENALSYYTGNSTKPTIAFTPSIDNKTVFANWTQRAQDGKIAKTPLIIGSNTNEGAGFV  
SFTPNGPGAATLNLTESIIACPVAAEVKNRNLANLTTYRYQYAGNFSNISPLPWFAGYH  
SSELPMIFGTHYERDASTQFQWDVSYAMQALWLSFAEDPSRGPRLALDGVAANPNN  
SSYFAWPTFQQGSSNMLLFAENQTVMQLTTSARIDDDHCPTL

>3664\_t gene=3664\_g

MPQGFTRRAIGALLTATALLLIWRVSNYNVSSLAPSSDHVAKSGGNPRRIAKVSMLYGN  
PNPLYERALQSHERHAQRWGYPMYVLEEDISEGFWNKPSYVLSLVIQELAKPPAKRSEW  
LMWVDADSIINPAIPADIFLPPDLSEIHVASKDQNGLNTGIVFFHVHPWTVSMLVETL  
GHPLYLPEIDLGRSADQEAMARIMKKTGGPEGQGYAAGMAYLPRPWINTYEWHHAY  
EGEKGNMLVHFPGLEDDRWPHMANWLDIVEKTPLEWEVPLKESGYDEL TREYWAKFR  
AARDLANSVQEDILLPTGASTSLRQAANNVRLALQQHADEPELLQQQVDELKAAVRE  
ESSGR

>3672\_t gene=3672\_g

MAL TREERLKLANIDPELAETLKKITIPAPSPDAEPARIAGIRAYMKSQHKPAGPDSGVIE  
HDIFYPVRDGHQLRARVFRPAAAVQGDAAALPLV VYYHGGGWTIGSPEDAAPSCRNLVQ  
TLGVVCIAPSYRQGPEDPFPAGINDAWDGLKWIALHAESELATTGTPVSLSTGFVVGSS  
AGGSMAAILAHLARDEKESLAVPITGCFLLSMILPPETFETLPADWKYRDSYLSRTQEA  
CQHDPILTPQMEKIFHDSAAGDFASPLFVPIWPTGHASLPRTYFQVCGMDIVRDEALIYE  
QVLREENG VETRLDVYPGMPHTFWMFMGMLTQGGKANKDLEDGMKWLLGRSE

>3691\_t gene=3691\_g

MVELQPIFKRAYWALVAGSFAYASWLYAMTYPSVQRAALYMNLANPALWQDLNDVE  
NYGFLKTQVQPFYLRTADNETIYGWHILPLHLCREHEELLNDNWSYGAEDYTSTKAYK  
LLNEDPNARAVVSFHGNA AHLG SVIRPEMYRMALGVSTPENPLHVFALDYRGYGMSTG  
TPTEEGVITDGV TLLNFLTSNPLNISPSRIVITGLSLGTA VTSAVAERFAFGAPVTATVQPA  
LKNPEPFAGIILLASFSNLP SLIESYSLKGLTPMLSPLNSFPQAKTWIKSRIVDTWETNAR  
LARLTGMRTSENNEADKRHTQKEVDITVIHARND AEIPWKEGFTNWMWATTGGDSLDS  
HQPQKGSIVYERIEDGGRTEIRVWEKDVSSPSSTKKQVKRVRWEKVG YGGHNQVGAYS  
VAALAILRSFEE

>3730\_t gene=3730\_g

MPSSEVLDDTILLSLGHGCIQGRLIHDTDESAEAAAPLAQYFGGVRYALPPSRRWAMA  
RRLPAEYSYGTGTNPGKCDGMAVTCPPFVGDQGEDCFECNVWMPVGRCPVGGWPV  
IFYIHGGFLQMSPNDINPARLIGETDLKCVIAPVYRLAILGFLSSVELSQEAAAQGEPSG  
NQGFWDQRIALEWAYEYAQYFGGNRSNITIAGYSAGSFSVFNQLAHDLYLPREKSIIRQA  
IMLSNGPGVQPKAGPEVQRQFNELLTALNIPLRLSAAEKLAQLRKIPPSQLIAAS IETQYH  
QYRPWHDGQFVPITLFPDIDNGTFARKMVERNIRLINGECRDEHFLYGTWYTPENSLESL  
RQRLEADYPSEACDALVNLYYPSGQLPAGVDNWQDAFGRLYADVQVHMLERGFVNAL  
AQGGAGHLVYRYRIEYRVEC VTLPEWGVTHSSDMAMWLWGNGARLNPTEKELVNEA  
LIGPLVEFVNGRPLDRWVDYGN AEGVQRVRRLRSDGRVDVWVDDDEMWLGRGVQVWSA  
LRRARNTPAKL

>3766\_t gene=3766\_g

MRTSFITLGLAAAVSAAPVALESRTTCYSGVYVIGVRGTDEAAGYGSVASVSSVLA AIP  
GSAGVALDYPASYLDPLYPTSVTDGINTLISLVQSYADSCSGDIVLVGFSQGGNVITDAL  
AGGVDKPTPLSASYIDHISAITVFGDPTFTHGQSF DAGTDTSSDGIFSRGGDSLALLNTYA  
SKIKSYCDTGDVYCASGDNTSAHSQEVPTWGTD AVSFIVSQST

>3770\_t gene=3770\_g

MADTLLLKLHLFLEGHPSIKCTLPSSPEYPSASHVWN AIHSEVPLAIVHPQTPNDVSALVK  
FAKSEGINFTVRTGGHNAEGRSIRQDTLTIDMRALSGVEIAADCQSATIGGGCLLKEIVTK  
LKEKGLVTPSGTISSIGYVGWATYGGYGPFSQLWGLGVDQIIDATV V NADGEIVEADSSL  
LKGIRGAGGFFGIIVALKIKVYPSREILAGVILYDSQRIGDSFKQFNAA YEKLQANGLPSA



LSIQQLLFNGPSGPTFGVMLAWISDAKEGLRWTQIIASLGSVVINTVPTNIVDWMTGNE  
AMTSATVYGSNYTHNVYRVTEVADTILKHIERLPSDPSTVISIHQLRGVSACAKSNSVFA  
SREPHYMLEIVGCATAPERAKESQKWAYAVWKDLQENNSQIILPTAYINTGTNDRKLST  
LSLYFGDHFVQEIVALKRRLDPDNVFNLTIPKLG

>3778\_t gene=3778\_g

MSLPQRPTNAPSSRREDSQPGFRESSRRRRRDIESGTFTEVPPSPYTPTSPRRSHGRHVSHS  
SSRGGPPTRGSPSTDLGRKRSLVRPERNQIGPDHPNYHYAQYAQSHNMATYPSTTGHDPI  
LDNPEDAETTGSTESSLKTGKHAHAYALEGNLKNPMERVEHAPSSRHKKKKLYRKGSK  
KHIESEEKRQKQVREHVPAPSPWYAYCVLVTFWAPDMVMACMGMRKAEQRRAWREK  
MGLISLILLVCTFVGFVTFVGFTEVCGTTKTRIAAGHVDSGYMIFHGEAYDLSNSEHPAA  
YGIPQGSNVLYDLPVKYSGKDGSLFQNVNGACKDIITLAEGSDIPTNSKGELAWYFPCQ  
TYNQDGSYKTNETTPYLYGMCHLSSEARNDFYSLTSSGDVYFTWDDLGNKSRNLIV  
YSGDVLDDLTYLNSSQVSFPLFTEMQSNTEIRGTDVYAFQTSSEKRVAKCLSQIIRV  
GSIDTKTIGCIASQVVLVYSLVFILSIVAARFSMALFFHWFLSKKYAANRSSMTLDRRAR  
AQQIEDWTEDIYRPAPRLADPPVPEKMARKRASFLPTTSRFSSPYAVGGGRVKAQPTTM  
ASQNSSSRLVPTANGSNSMYKLSGNSSNGSLSDVAISRHNAAAADSRTSLMISQYDQRH  
STVVGSSSEGPAGFIHENVVPPPEWQPFQFPLAHTLCLVTCYSEGEEGIRSTLDSIALTD  
YPNSHKTILVICDGIKKGGEEMSTPDYVLGMMRDHVIPPDEVQPYSYVAVASGSKRHN  
MAKIYAGFYDYGQTSIIPPEKQQRVPMLVVVKCGTPAEAKASKPGNRGKRDSQIILMSFL  
QKVMFDERMTELEFEMFNGFWNITGISPDYIEIILMVDADTKVFPDSLTHMVSAMVKDP  
DIMGLCGETKIANKTQSWVTMIQVFEYYISHHQAKAFESVFGGVTCLPGCFSMYRIKAP  
KGGQNYWVPILANPDIVEHYSENVVDLHKKNLLLLGEDRYLTTMLKTFPKRKQVVFV  
PQAVCKTTVPDSFMVLLSQRRRWINSTVHNLFCFVRDLCGTFCFSMQFVVFIDMIGSL  
VLPAAISFTFYVVVKSIVSKPVQVIPLVLLALILGLPGVLIIVTANRWVYVWMLIYLLSLP  
VWNFVLPVYAFWKFDDFSWDTRKTAGDTGKGGHGEAEGEFDSSKITMKRWRDFEKE  
RRLNMSAAQGLPPPNSMPAAAYTPGAYDAYSDY

>3797\_t gene=3797\_g

MMSAYNLSIGFCLSLSNVLAQLQTFSPGQTDITYSVNVPDQTATTGSGPLFIQIKSTT  
VKLEWLAFGEGTQMQGSNIFVIYGNNGNNTLSPRLGGPHVEPLFNPQAQVSLLDGSGI  
SNGTITANIRCDSCISWSSGKEDVTSSASWVWAIKYGSLINSDSVSATITQHDVSLASI  
NLQAAATGGNSTNPFLTSTSTSTSSNPNPNPQPIVTTTSTESSDRKRIAHATIMIIAMV  
VLFPSFALSIHLLPSTRAVALHGYFQLFTLALTIIGFGLGISLVNLYPITGSSYHQIIGIIVVS  
FLTLFQPAMGLLQHRYWRKSGKKSVMFAYAHRWLGRMTMIVLGIVNAGLGRFTGIGTTL  
APKGAVIAYGVVAGIVGIGYILTVVFLSYRQRASST

>3814\_t gene=3814\_g

MWSFLQETSTMGLFYNSLLLLQSFLGPKGCTHSPGDRACWKDEFSDIDTYEYEVPTGKL  
VEYDFTISEHTIAPDGYLTNVTIINGQFPPTVEADWGDITRVTVHNNLTNLNGTSFHHW  
GIRQFQTNFLDGVPGVTQCPAKPGDSQVYEFAMQYGTGWYHSHYSLQYSNGAYGPV  
VIHGPTSANYDHELEPLLVSVDWYHADAFSMFHEEITDHAHIPTGTLMNGKGVFDCDPKE  
DGRCTGKEERHEIFFEPGKHKHLRLVNSGLATYKFWMDGHNFIIVVANDFVPIEPYVTD  
VLILGIAQRYDVIVEANGSLEHGSNFMHATHCDEMPVPWDTRIGIIRYDANDRSDPY  
TPSPSTHHPGYGCRDPDPSNLRPIVKRQVGKEVNDMSPSEYLKIGLQSWPNISDPDSVIRK  
WVLANRSQYVDWRDPSLMQVISHDKVNLTEESAPIYLDYETGEWVYFVIEGNFTMDPNI  
NNPPRPIPRSVHPIHLHGHDVFILAQGDGFTSDVVPNLNNPARRDVTNCPIGGYVWIAF

QINNPRAWLMHCHIAWHASAGLSLQFIEQPNKIKQMVLASGILPSHEKQCARWTDHYN  
NVNVPQGVVTQEDSGI

>3815\_t gene=3815\_g

MGRFFSRAQLLVA AVAAVVAARGDRGNSYISRHHGSGTTADYVIIGAGPAGVVLAE  
QLSRDETKSVVLEIAGPDSIHNVTVDIPAMYPLITEQYWNYTAQPDNNLGGNAPTLLQQG  
RTIGGGSGVNGMAYCRGSASLFDAWATLSGNDGLAWGSILQDFLETSHYTENPNADYD  
QVLNTSAFGDGPLEVSRVGALTGFENPFNALQAELGLDEVLDLTDGSGIGLDRGLSSITA  
VKRTRSYGRITFTGLIEKRSNVRILTYAWVSKINFYGTAVSVTYHVDGVARTIEGKEIIV  
SGGAINTPKLLLLSGVGPKEPLEPLGIEVIADIPDVGANLRDHAFIIIELEVPEILTLYQW  
FENATVNAEAEADYAVNRTGILGSNDGFTYGTYRLPDSIWDGINGTYTSLPEDRPHILF  
EFSSLPFLITDGSALTTWASLVQPEGSYVSINTTDYADPLIYTNYYATQADRAAIIAGY  
KLLIKITENEQIKAVTVNKVFPTELTTDDEIWAIIQSQTYTFHHPMGTVIAGKALDSNW  
RLNGLSGIRVVDSSFTPLPVTCHPQATVYALANRAAKDIIAADFEDC

>3840\_t gene=3840\_g

MGGPEELKIPSSRNENLQIALSVYSPEEDKSPLPVIVMGHGIGAIQAAGLEPFALAFASG  
YCAITFDYLHFHGKSDGEPNFLSVPGELQDFRDVISWARQQTKRFDSQRIVWGTSFSGM  
HTTALLASDHNLAGGIAQCPCVDSFAAMKMQPLLKNLRLMLNAVCDRIGAFFGKEPLY  
VGLAGDGLPGSPISLMEGPEVVEGWQRITPSNIPFPNKITARSLLGGSSRPVLDVKKIQKP  
YLIVLPTWDNEAPLGAETA VRETPLGEALRVPGGHFDVYAGGIAFDENLSGQLAFLRRI  
LG

>3853\_t gene=3853\_g

MKIQRAFSLLVAFAMSSKTNAALASSHNSTYTNPILPGWHS DPSCVFAEENNTFFCTTS  
SFLTFFGPIPIYASQDLLHWKLVSNVFRPEQVPEIANSTSQTQQDGLWASTIRYRNGKFYL  
VTSYASTYPSFKVVSGFLFTSTNIYSENSWTDVRF AIRDIDPDFWDDGTTYISRAGIV  
QQTIDLETGVLGPETKIWGGTGGATPEGPHIYKKGWY YLMISEGGTGLNHRVTIARSS  
NVSGPYEGYSGNPILTNSNTTEYFQTVGHADLFQDGDGNWWGSSLATRSGPAWTIYPM  
GRETVLYAVTWKEGEWPILEPVQGMGTGWKLPQPSKGEEIPNGAYVDAPDHITFGPG  
TSIPHTLLYWRFPKEGSFTVSPPEPYSRLRLPSSHNITVTGVPGVNVNETAILITRRQSHT  
YFTFSVDITYAPTVAEEEEAGVTIFLTQDQHIDLGIVLLSIEGSLVPHIRFQTTLLNDLTPAT  
QNVTVPGTVVEPLPSSSSKDIRARLRIQAKDDTHYILSATLHEDSEFEFSQTVEAVLVSSG  
TGRFTGTLTGTYATSNNGSGFTPAYISQWKYKGGQKIF

>3857\_t gene=3857\_g

MSHALETTQLHPSDKRSDNEIFADLQTYKPVDRASERNI WAFWDQGIAASKPWCQRNII  
GWVRRHSPRWSVRVLDMVEGSPNHYSKYFSDPETLFPTAFLQRNMIGKYVGPAAADLI  
RLPLLYLYGGVWLDVGFLLFRDLDDLCWQTLTDPLSPFELAGFKMTINPSLAMFWNGFI  
AARKGSQAIKHWHDIFFRIWDGRTSCKGMHSHPLL RHLPRYEVPSKGPAPITYENFVD  
YLAQMFCLERLRHFCDPKDWGDPQFFEAKVLLFECVSEVYWAQHLTHWDGRKQFNM  
LSCIREETEPGFLEAEKQVQELSTSTMKLSHGLVTEQREYLARIWSEPGNEDADHRAGT  
FAAYLRWASVYFQQTSLTRVQLPVYEKAILTGRLQLTVGEPHLS

>3879\_t gene=3879\_g

MAKHQSKPAWSTSPRVLNILRPRLLVPLGCALALLSACLALQFENQSYALRLQLFRP  
SRYFEKECYAPSESATNRLQH VATETSDGEWQYNPSRDANNYALNSDQCLAAPKMFT  
EIDKSVAQRKEANNPITFKEIDSRKKGQGMARAMIYK GELYIIQYGDMIYTASRAKSTL  
HSIHRALVAMPDRDSLPSIEFHFSADDFVWDDLKQAGGPVWSYSKRDTTIDEEDVDDS

NIWLMPDFGYWAWPEVDIAPYAETRRIIAVDADFEFQSKKKQLLWRGSLNTAIDLR  
NGLIDATKNKFWASVRVVDWGNKKSVEENVMPIEDHCRYMFLAHTEGRSFSGRGKYL  
LNCRSVFITHPLIWREAHHAAFVSSGPDANYIEVARDFSNLESKVEYLLDNPQIAERIANN  
SVATFRDRYLTPAAEACYWRYLIRKYGEVSDFEPKLYDDRTGKMRAQAYEQWVLEL

>3887\_t gene=3887\_g

MFFRPSISTAILGGLSLLPSAHCSPLLESERSLHKRISFDGSSSITLALNTDFPDPAFVQHT  
DGSWYAFGTNGNGKRIQVAYSTNFESWTLLEDVEALPTLSGWETEPDHWAPDVFQSDG  
KYVMYYSIAIVSSNPNRHCIQVAIADSDNPAGPYIPASTNPLACPLEQGGAIDASGFQSD  
GTRYIVYKIDGNSVGHGGDCNNSVEPLAATPIMLQRVAEDGITPLGDAVQLIDRDASDG  
PLVEAPSLVRADDGTYLLFYSTHCFTDVKYDVRVATASSIAGPYSKNGVSVLAANDELY  
GPGGATVSNLGNMLFHGWCONGNSVRCMYAA YMDVSGGSPFVE

>3901\_t gene=3901\_g

MSAENKDDNFDIIIIGGGTAGSVLAARLSTIPTLNILVLEAGENRNLEPRVSTPGLFGTLLG  
DPNYDWGFRTVSEQLNQRVILQPRGKLWGGSSAINSHALVYPSRGYHDAWGTLVGA  
GNSWDWNGISKYYRRFQNLQAPSEEVKRELGLGDFAVDGGNSACELDEYEERVQASYP  
VTVHPMQQAWAEAIQDLGYGSSKNPVDGDVGGSTTTNVIDSSKGERSHAGVAFLEPST  
ERSNLVVRGNVLVNKIIFEEERKRDGNLVAKGVLYSQEDGKTMIAYAKREIVLCAGTFGS  
PKVLELSIGQREKLAAAGVKCLRELEGVGGNLQDHLNFGPSVEVLESIGTSDVAARDPI  
VAEADKKLYEAKHEGRLSQGAAYSFSYMPKVFNSEDEERELTSLVNMTLEKTSLTISK  
GLKAQYDIIQRLILNPEQASATWVMIRKQRYTPSITPAPGNMTVLAMLSYPFSGSSHIT  
SADPSAYPEIKFNLYKHPLDAEILSRHVIKIGQMLEQPKVSALLKPDGNTLPRGFPRRANS  
VEEVTRFIRQFGATNYHPVGTCAMLREDLDGVVNEDLVVYGTANLRICDASVIPIVPHG  
NILSTVYATAEKGADIIKRQLGLQ

>3902\_t gene=3902\_g

MRVLLLLLVGILAPAALSSTDGIYNLVKRRLPQHAESFEFSLVNETEKNANVNDTYVVS  
WTSDGKVLVEGNLSALSSGLYHYLSDVAHVGIYWFIGSRLETVSTLPLIEPLMGSSVV  
PWRYHFNTVTFSYTAAFWSWDDWELQLDWMALHGINLPLAWVGAEKILVDIFRELGLT  
NSEIQSFLSGPAFPWNRLGNIQGSWGGGEIPFDWIDRQFEMQLQIVSRMAELGMTVPVLP  
AFSGYVPQAITRVLPNATVVNGSQWDGFPIKYTNDTFLEPSDPNFAAIQKSYIGRQQAAY  
GSNVTHIYTLDQYNENAPYSGDLNLYLQNVTRNTWRSLKAADPEAVWMMQGWLFYAN  
SAFWTDDRIEAFLSGVETDSMILDLVSDAAPLWQDTKSYYGKPIWCQMHDFFGGNM  
GFMGRILNVTQNLATLALAESGSLVGFNTMEGQEGNEVIYDLLLLSQAWSDSPIETENYF  
HRWVTARYGPSTPPADTYAAWEILRTSVYDVTDPNSVVVPWPVVVYTPGIGIANVTGV  
TSLPYDPSFVVEAWSLLYNSAIDEPSLWNNPSYQHDIVDLTRQVLENAFIPRYETLTDLY  
TGTNASTEALSAAGKVLIDLLETLDTVLATNKNFLLSTWLT DARSWAGDNSSVEDFFEY  
DARNIITLWGPNGEIKDYASKSWAGLVSSYYAPRWEIFVEYLISTPASAYNSTVINAELLD  
FAQQWQNEKTVPNTAVSTNGKLEVLLQAVKQWPDIFDILSS

>3915\_t gene=3915\_g

MMDLLSLEISSGRKHALDIAHLSWPWTLLAAVLILKILHILRVVHQPLRTLPGHWLASF  
SRLYKIFLVYDGLCPEKERAMHKKYGPVVRTGPHHVSFSDPAAISSIYGISANLMKVFL  
LIVLLDPALTFLTQSDFYTPFGARHEGKAFTDIFSTRDVFHKLKVVHVSQIFSLGSIRTLE  
PMVDECSDFLRTMHELAGEKVDLGEWLHWYAFDVGISITFNKRFGFMEQRKDIGHMIA  
VIDKVLMYGTVIGQVPYLHRYLLGNDYLPALIAKLAPDVPNPVSIIEFAKTELIRYDRSK  
NVSDRGDFLAWIRREMOKGKDISEDDMVNHLANNLLAGGDTTISLRAIYFLIKNPPAY

RKVIAEIDAADAAGQLSKFITYSESLELKYLQAAIREAMRLHPGVSMPLERVVPSTGATIC  
GINLPAGTVVGVNPAVVHYDTDAYGDDAAEFRPERWLESSEEQLKAMKRCFFAFGHGS  
RACIGRNISIMELSKLVPQLLREFEIEWASEEPAWKRIILSFIKPYNNLTKPPTLDPPPPSIVT  
TSHHRRRSSTSVPLRLVKESQPSQHPSWGQGSTSGLPAGPNSVRPTTLPIPGTPSNPLPS  
PMTLSRSPSPLPGGGWSSPGLGPGSGATSPRFPTTGHGSLSPGAISWASAKAKSDEVRSYP  
SFSTRNSGFFSRQKRKISASLPRFSLSRDYREQEKLGRGRSSGSSTAGWRARDNSLKGRV  
VSFVGNAMRRRRFRLLFSLLLGLVLYLNFWSTLVEAYRGSAFGNRGRKIVIVTASNVEGG  
VMEWKGAREWAIERVSLWNRKYAKKWGYEIEVNMVAKKRYAHEWRESWEKVDL  
IRDAMKKYPNAEWFWWLDLNTYIMEYSYSLENHIFKHLDEYTYRDINYNPLNITHPLT  
DIYLDPISQSATGDQDPSSINLVLPQDCGGFNLSFFIRRSWDTRLLDIWWDVPLYEQK  
HMDWEHKEQDSLEYLYTNQPWIRPSTAFLPQRRVNSFPPGACGDGTDLGIHYQEEHRDF  
LVNMAGCNWGRDCWAEIYGYRELSNWLNRWWEKFKDSITDVWRRWRGEKTLYEEH  
HEWVQ

>3931\_t gene=3931\_g

MKAFITALTLASSYALAAPAEPLVKRASVSDAATGYASLNGGTTGGSGGTTTTVSSYAA  
LATAVTDGNKKVIFVSGTITQTADQIRPGNNTSIIKSDSNKLVNFGILVKKASNVVIRNL  
GISKVLAANGDAIGVQYSNNVWIDHVDVSSDRDHDKDFYDGLLDLTHAADFITVNSYI  
HDHWKASLIGHSDNNGAEDTGHLRVTQNNNYWYNVNSRTPSIRFGTGHIYNSYFDEVN  
DGINTRDGAQVLVQSNVFDSSNPLYSTDDGYAVATDNDFFGGGSNEAEAGTLTSVPYK  
YSLGSGNVKAAVVGTAQTLSF

>3941\_t gene=3941\_g

MAQYAKFSYINPQWERFVQAQPVMRNFRGSDDHIIQRRAAFQKLA AEGPQIRKIPGNDE  
VDVKDFHIPARDGYEILVRSYTPRRPAESGSAAYPVFVYHGGGYTFGDIETGDDNCR  
LLSARNGLAVLNVDYRLAPKYVFPKGFEDAHDALRWVTKNAPSFGGDL SKGFLVGGVS  
AGGNFAGALAYVARDEGLQPPITGLLLSIPCCMLPQAFHLLPQYKDELLSIEQNKSDML  
DVRSYKQLIEDICAPPDDPRISFLLNPDHSGLPTRAYFQIAGLDPIDEALLFAKLLREQS  
NAETKIDLYDGLPHGFWRQELPAAQRWHIDL YEGTKFLEGGKGGFHVKGTEENGLNE  
YLSGVI

>3986\_t gene=3986\_g

MAPQDRSSITFVTSKGLVDPQWYSHGVIVEGSTRITRTSGQIGQRADGSWPLTLAEVQVQ  
QALTNLDLILKAAGASSRDITHLRFYVANWDLEQDNDLVGPVVGLLSENYGVVHRPLTT  
LVPVPKLSYPEAKFEIEAIASTGGASRPWSIENDMIHKPMNLTTISGPASPIETDVVIGGG  
FSGLTAAVELHQAGFSVIVLEAKHRVGGRSRTQRLATNADAVIELGATWINKKTQPAIY  
ALVQKFGLETAEQYTEGDQIYQDFEGKIYRCDNSNQEHEKNAEHVQNFLTLVDEAAASV  
DIRAFGFPEDEDVTMARWVASKGLWDNPSVKATCHLMCSALVGREPQEVGAHYLLDYI  
NSCGGYMSFASEGEDGAQSLKIKTGTSSITDALASSLPVGSVMLNSPVEYIRQAGDNEVH  
VKTGSGATYKAKKTIVAIPTNTYTNIQFTPLPAAKRALVTRTKPGIYAKLILTYASPWW  
REAGLVGKFESVIGPVCFSWDISDESKKQYSLAIFIAGTPAAEWHKLGELEREEAVVEHL  
ATLVGDPTLAAKARDVKEINTVEWTKEEYLGGAPTSALGPGLLKKYGVTMREAFGSIHF  
GGGEMAYEWKGYMEGAIRAGQQRVAHEVVEILVDKATV

>3995\_t gene=3995\_g

MAISTLQTTNSTKQLKFLVIGAGSRGHRYAEAVTESTSALIHAVAEPRPWRQEFGERFI  
WGVNNKPSGQEFQTDWRDWLKWEQERRQALANGQQNVPLGIDGVFVCALDEMHEI  
MCAIAPLNHLVLCCKPLATSLADCLSIYRAFVPEHKKDVGPSKVFSIGHVLRYSPhnMRL

RQLLHEERVIGDVVSVEHVEPVGYWHFAHSYVRGNWRRETPAGVGSLLTKSCHDIDFL  
VWLLSSPPPGSPKDMPPHEPRTISSTGRLTQFIGKRKPKEAGNATNCLSCPIERKCNYS  
RLYKERQLDKSITDWPVHIVCPDIEDTFKVAGADAAEKLLMTALAEDYDKSSTPDEEIKS  
RSWYGRCVWESDNNVCDDQFVTITWDDEQPPSTSEGKYTPRTSKTASLHMIAPTEKQCE  
RRGRIYGTEGEIEYDSRTIKYFSFATNEFTTVEIPKAKNPKEEQAHGGGDWGLTRMFIGA  
VQAVEERGWDVRDAQREFIGCTLEEAVRSHAVVFAAEEARREEK VIRWQDWWDQHLLK  
SLV

>3996\_t gene=3996\_g

MTTHAEVYDIIIIGAGPCGLAVAARLREETPSAMFTDEEHQRYHWIKKHQGMSLARAR  
TRRLHGTPLAASTYTKPNNCCCGENDRGGQYSTLVLDNSGSQWMARWNRAFKALKID  
HLRSPMFFHVDPADRDGMLAYTRETGREKELYELSGCVGQELSKHKRKKIRNLSRFPRE  
AEINERDRKDYFTPSTELFADYCESIARYGLDDDSARIEQSEVCDIKFDEVEGSKDTNKL  
FTIVTTRGQLFHSRAVVLAVGPGLTRLMPWNLSPKKEIGACHSSEVGVKFPPTLARKIE  
NRETTHTVVVGGGLSSAQLADMAIRRGVTKVWHLIRGDMKIKHFDVSLNWWGKFKNY  
DKAVFWSADDDQERFEMIQTARNGGSITPHYQKILKQYTAKGRLSIHTQTVITSKSFDE  
THTWKITTDPIENFPERIDYICFATGMKVDVNEMNLLQSMNRDYPESINGLPCLTDDL  
MWRSDVPLFVTGRLASRLGPAAPNLEGARLGAERIAWALQDVLGEQSDVDFCSREGK  
RLQKAFCLGNRYESLTQY

>3997\_t gene=3997\_g

MLSLSQYAVILATALSIAKPTIARPTLHPGGASDLIINAQDTVNGTISASASKSQSVTATN  
GTSLLTITNNIAGSVNICYINGQDPSQNNAPVILTPDFSWYYPASPTTDGIPAPISETITPL  
GAQGESTTITIPSYVISARVWFVAVGELQFFTVDGNADGTFIVQPSQSNPADPSAGVNWGFI  
EFTYTADGGIYANISYVDFVGLPLGMSLTDTSGGVQTALGLTSDAVTSVCNDLKTQAA  
DGLPWDALCQTINGTVMRVLSPNDYMAANASSGFETYFDDYVNEVWSNYTSSTLTINT  
QNDAGNVSCTVSGDTLECDGDGINYSKSTADIFGCNSGPFVTNPSDTAVHQAAPVRLC  
AAFNRGTTTTGGDVQPSLGADSYTTAPSNNYSAIVHKEYELDGKGYAFAYDDVNP  
SGD  
DDENASGTVSSANPSVLSVTVGGAST

>4007\_t gene=4007\_g

METFSIDLTSQTRITGRHCLPQVDQPTSEKFRPLLIHGHAGYDSKYFDANADYSWSILA  
NAFDIPIVSDRPGYGGSTEVPQNVLGGTDAPTPTQRQAEYINNSVIPRIWDFGSKSGA  
SSVVILGHSVGGMVAIQTAACHATQKNTTYPLSGLVVSGIGCVPHQDPESQSHDHTSNS  
HKDEKEQKPAQLLERTQYITFERTKKDFLMLDYTADKDPADLLISPDILQLTEQLNHPAP  
LAELIDVGQLWRLYWRRESGKVIVPVFYALNEVDPWFNSASDSVTAFAGFTSSPKVVH  
ARVARAPHCMELSLQAKGWMLQCGGFALESVTFNLRNR

>4014\_t gene=4014\_g

MQLFTRILLAFSGLLVVNAAPNNVEKRDGNYSVAYYVDWAVYGRNFHVQDLHDMVP  
SLTHILYSFASLDESTGEVLLGDNYADIQKTYPGDPAYDNGHNVYGCVKQLYLLKKNR  
NLKVLVSVGGYSWSSRFAGATSTEANRANFVRTAVGFVQDLGFDGIDIDWEYPCNYTE  
AVNYVTLLQELRAGLDNYAAHTPGYHYLLSVSPAGPSHYEILHISAMNQYLDMWNL  
MAYDYSGSWDTITGMDANVYQKTAYTNSTPFNTDQAITYYNGNGASASKINLGLPLYG  
RAFQNTDGPGTAYSGVGPWSWQDGIWDYKALPRPGGTLYHEDSSVSAWTYDHAQRYM  
VSYDTPPTIVQTKANYIKSEGLGGGAFWESSGDKTGSDSLVHTLVNALGGNGVLQRADN  
ELNYPASQYDNLRNGMQ

>4018\_t gene=4018\_g

MAPSIGVPSKRPLEETLVKPTINGSAHQDNAQQHSKTRQRRSKTKPLSQALIHALFSESV  
AAKLWNVAQKALGSVEPPTLYPEYTDKKDFQYIYRTLDFWTSGFFPGSLYLLLERQVRF  
SSSAKSGAKPHPLQLQHLCQWWTVNLHQNAILKNTHDLGFMIAPWAMKAWSLHQDSQ  
AYSSLVLAAYSLASRFDARVQSLRSWDVCYTKRYSYDDPSKEFLVIIDNMLNLDILFWA  
AKHTGDTSLREIAIAHAKTSQKHHIRPDNTTYHVVNFEVETGLPKSKFTNQGFSDESCWA  
RGQSWGILGFMQTYGWTQDPSFLATARKLADLFISKLPEDNVPYWDFDAPINEESPRDT  
SAAIVTCCGLVLLYKALRDTEEQIAAHHYLDAALRIVNGVVANYMTPSTPQFNVDTSAS  
TVPTYPEDLSKEQQPGILTVTSENSQRGFANGHSTSKLPETILIGATINNYEFAPRRWSD  
HGLVYADYYFMLLGNMMLLEMGLVDVNDLSL

>4039\_t gene=4039\_g

MRCIPSIAVIVPAILAVGHATSPPPAIVSLPGQTSKIPGWSLQSVLHASNDYTGLSRPGANV  
ADWYRVGPRTTVMAGLIESGVYSDSNLWFSNLDNEIVDRSVFNAPWIYREEFTVEPSAG  
QHYFLVTHGITSKADIWLNKQLADKDFQEGSYGGHKYEVTPLYQSGVNAILQAYETN  
YLLDSAMGFVDWNPYSPDNGTGVWRDVEISQTGPVSLAPIRFIHDWTPGKTSTKVTIKV  
NATNLESRTVDGTLTGRIVLGSQQLALTEAFTLAAHEERTIAMTGQLQDPEIWWPWLW  
GDQPLYNVTVTALVNNEISDIAEPRRVGIRYVESGLNEYGDRAFSINGLRFIPLGGGYSPD  
MFMRDTEYVRKKFELMIDMGMNTVRLEGKQEHPELFELADEMGLMIMPGWECCDW  
WEGWYNTDVPEYVRFTNHDYWVANYSMLHEASMMQTHPSVLAFLVGS DYWPNDRA  
ASIYLDALKSWDWPNIASAGELGFPDALGSSGMKMDGPYDYVPPNYWYGGQVGAAF  
GFGSEEGPGVGTPEIRSLKKFLSEGDLNDLWTQPKGLFHMSNVSSFYNRSIYNDALW  
NRYGLPKSLEDYLLKVQMMDYEAATRAEFEGFTSLQDASRPSTGVIIYWMMSAWPNLH  
WQLFDYLLNPAGSYFGSKVGARPEHISFSYDNGTVYLNRLKFLGKGESASRWVTIDLID  
TAGKNLHHQRLQLNTPNHSQEIANIAQAISKIKDVGFLRLILSSDSNNEVVQSRNVYWL  
SSQNDVLDWNSDNWFYTPITYADYSSLQNLPEANIVTTVKQNSSSVSTTTLQVHLENKS  
TDTPAFFIRLVLVDSNTNDSIDPPFWSDNYVTLFPKESLDLTVRFNSSLSASPAIEVSGGNV  
KQHVITV

>4048\_t gene=4048\_g

MPSLFSSPAVIFSLAALMRVGLLFYGLYQDNHSAMKYTDIDYMVFTDASYFMAEGKSPY  
LRDITYRYTPLLAWFLIPTTWEPNWLWFSFGKVLFAIADLVGTWLLLLVLRTEFPSEMSEK  
ARLRYASIWLLNPMVATISTRGSSEGLLGVMIALLWAVLNRHIVFASVLLGLGVHFKIY  
PFYIAPSIIWFLSATTPSTSLVNKILNFITVDRVKVTVISLLTFIGLNVWMYSFYGHSFLQH  
TYFHHLTRIDHRHNFSPYNTLLYLSAATDDLDAASRGIKFESVAFLPQLFLSAFAIPLALA  
KKSLPGAMLAQTFAFVTFNKVCTSQYFLWYLVFLPLYLPSSEFMSNPILGIGALIMWILSQ  
AFWLHQGFQLEFMGLSTFLPGLWLASLGGFIVNCWVLGIIVSDVGKWPAAKALQTRREDP  
RTVTQKNK

>4051\_t gene=4051\_g

MSRAEESLLNSKDDLLEAEGAYKRRIAAQRCWQAASRVLILTPLVLSIVLFVVYFRDV  
AKPLDLVASNTTTPQITADKELERDFGILLHPKDHVLRQPNVLHSSWNITKAIAPDGV  
KNVFLINGQFPPTIEARSGDVLEVDVNLVEERVSIHWHGLHMRGANQMDGPVGTQC  
GIKPGDKFTYRVPIGEQAQTFWYHAHSEVQRGDGLYGALIVHKVSAEADSYAHDKELL  
LLVGDWYHRPADWLLARFQDRTSTGNEPNPDSLLINGQGRFDCSKATHGNPNVCTSVE  
PPQLSLNKELRYKVRINIGSLAGISITIPDSDMNVTHVDGGIPVTSRTANSIGVLYPGERV  
DFSLSWPEPAFNTNTQIIIIDKEMFILSNPALTRKQSFLLEADSHLHQSIGRQADTELRL  
NLDELEGLPLETSLPEPETKFMITYTTVQILNALDDDIRALINRTYWETPSVPLIASQRDWT

SSHQLVPWTGDKPVWVELTINNIDINGHPFHLHGFDYVVGLEYEGHSGWNAYNPFDPW  
SSPRGGPFNLVNPKRKDTVLVPKSGYAVIRFLADNEGIWALHCHVLWHQASGMTMALQ  
VLGDETKGFSEYTSIDALEQCRT

>4094\_t gene=4094\_g

MSEHFTTPAVSAMSVDNDTLPEKVVDTVDSYDYVVVVGSGAGGGPLAANLARNGHKVL  
LLEAGDDQGSNIHQVPGFHLSTEDEKFRWDYVVKHYADEVARQDSKMTWETPAG  
TLYVGLNPPSGSKPKGILYPRAGTLGGCSAHNALITIYPHESDWSNIANLTGDISWDPKN  
MRQYFRRLEHCEYLPSSGSSGHGFTGWLHTSRADLELTLRDSKFLSILSAATAMGNTILG  
LIPEKVSQVLGLLQRDVNSSDPDRDATEGLYHIPLSKNQAKRSGPRDFLVNTAKEYPLHI  
RTRCLATRVLFEENTVIPKAIGVEFLEGSSLYKADPRSSLSAGGTKHRVLSREVILAAGA  
FNTPQLLKLSGVGPTEDELERFGIPVVKELQGVGTNLQDRYEVVISKVQDDFQTIAECTF  
GKPGDPAPKEWTHECGPYLSNGLDLGMTKKSRYADGDPDLFIFGGPTLFKGYYPGHSER  
ATFDKKHFTWAVLKAHTRNREGTVRLKSTDPDMPDINFNYFGMSAAATEASERDIDA  
VAEGVSFARRIMDKTPLFDNKPPEEQIPGYEVSSVEQVKQFIRNESWGHHASCSCPIGPD  
DDPNAVLDSRFRVRGVKNLRIVDASVFPRIPIVLPYIMISEKATDVILEDISETRHG

>4131\_t gene=4131\_g

MIETAISIAFWLSSCLTVLILALPSQYIPRAAQEGKGDEGKEKVTVQILVLGDIGRSPRMQ  
YHALSIARHGGQVEIIGYQESDPHEITSNANISIVPLPPHPNILQTSNKLLFLAFGPLKVL  
QVLSLWICLAYRTKPAKYLLVQNPPSIPTLALASVVCFFRQTRLIIDWHNFGYSILALKLG  
DQHPLVRISKWYEKLFCEGWATAHFCVTNAMARVLKEEFGITKARILTLHDRPASHFVPIL  
DEEERVQFLASLAEVTATQAELASGNVRVLSSTSWTADEDFSVLIDALCRYSTVATTE  
NTALPRVLAHTGKGPQKEMYLNEISTREKAGKLGKVTIKTAWLSTLDYAKLLGCASLG  
VSLHTSSSGVDLPMKVVDMMFAGLPPVVGWSRFEAWPELVTEGVNNGRFGSSEELAIHL  
TDLFGNPQKLENLRAGAQNESLHRWDQEWDPAGRLLELVK

>4142\_t gene=4142\_g

MATPKYSIPEEFKDLRFVEAADTRSDDEILGSLRKAAPLTSSEKNIWAFWDSGIDKVPS  
WTRRNVINWARLCGPSWTIRVLDMPDPSNNALNFVPPAMPLPQTFTKGTMKGPYIGPH  
SADFLRGALTYLYGGVFMVDVGHILVRSCLKICWDILSDPTKQQISVPWMYGTIMANHFV  
AARQHDPFIKRWHDLFVYLVNGKDIYEGLSNPLLAFTAKLDFSASQRRGFAWDFQVEP  
MVVFDYITQVTAWLRLCMLDAGDGFSCADYAQNNILWFDALDWDAAEKVIGYQGE  
QLFEVLTTRLDEDPESEYKAYKTIWRILTNSMQKVTGKGLTKTAALGVLLDKPEN  
RNKDVEPGTFADLLRYGSVHFEQTRSQITIIQTEKPAETMKGKGVFEP

>4144\_t gene=4144\_g

MKGLVAMGLIASASAAALATRDATTCPGYKASNVKTTAGGIISADLTLAGAACNVYG  
TDLDNLVLQVEYETETRLHVKIYDAAEQVYQVPTSVLPRPVSSNIKPAKSDLKVTIVNSP  
FSFKVTRKSNGEVLFDTAGQPLIFESQYLGLRTSLPENPYLYGLGESTDPFPLPINNYSRTL  
WSRDAYLTPQYTNYGNHPIYFDHRGSKGTHGVLLNSNGMDIKINQDKNGQYLEYNT  
LGGVLDYFLAGPTPKDVAIQYSETVGKAVMMPYWGFGFHNCRYGYQDCFEVAEIIAN  
YSAANIPLTQWTDIDYMDLRKVFTLDPLRYPVDLVRQIVSYLHEHDQHYIVMVDPAVA  
YQDYAPFNDGVDTGAFLLTVSNGSVYQGVVWPGVAAPDFWASNTQSYWNNQFSTFFS  
PDNGVDIDALWIDMNEASNFCTYPCSDPAFAQASAGDPPAPPVRISSPRIAGFGPDFQP  
KCVANVNFTVYAETYYGENIYVLGNSPTLGDGLVSGAVAMSANDYPEWQLTVQMPAN  
STFSYEVVRKEGDGSWIYEKSNRTITTTGDCNTGLQSVSDTITTTSSGAQKRGISPVPLVRSP  
VAAALHKRDGSMGLPGRDLINPKYNINDTAGSISNLTIRTDLIHENGLAEYDTHNMYG

TMMSATSRNAMLNRRRPTVRPLVITRSTFAGAGRQVGHWLGDNHADWDHYRWTIAELQ  
EFAAIYQVPMVGSIDICGYDGTTTDEL CARWVFLGAFSPFFRDHSDNTSPHELRYRTEAIA  
QAARAAIDIRYRLLDYTYTALWTQTQTGSPMINPMFFEYPSDLNTATLPYQFFWGD  
SILVAPVTDENSTSVSVYFPKDTFYDFYTGKPVINGAAVTL SNIAFDSIPLYKGG  
SII PQRIASANTTALLRQQNFEIVIAPNNFGQASGTYLDDGDSIEQPKTSVINFEYLDGLFSMTGTFGY  
NAGNVIVSQITVLGQNVQKHTVNLKLTGAHVGVYL

>4167\_t gene=4167\_g

MASVLRIGSALLLGAALVNGQTTTATTTSIAPAQQT VSSSDSDSGVPLNTAETVQLTTEVL  
QNLTTQLNDTTVS YDFGNDT VTTTKRSSTGCKVFPGDQAWPIDLLWDIFD LLLGGRLIK  
TVPSASSCYSGWGDQNAAECA YVNSEWTD SHFHMEDPTSIMWPLFQGR TCLPTS  
YNITG TCTLGGYPSYAVNASNVAQIQLAVNFARNLNLRLVVKNTGHDFNGKSSGAGALS  
IWITHHLKSLSYIPEYSDSTYSGPAVKMGAGIQAYEVYEFANAYGISVVGEGKTVGV  
VAGGYFLGGGHSPLGSVYGLAADQVVAMEVVL PNVFTT VTA STNPDLFWALRGGG  
STFGIVTSVVAKAHPKIGVTVAEFTFGTSDVISADTFEALKTYYS CFDAFTAAGTYV  
YFVWFPLGNDQYLFEFNPF FAVNHTLDQFN TLIQPFVDDL SLLGISVTPNGTY  
YDNFYDAWMSAFPLETVGSVTLQTGSR LFPREN FVNATLLNQTVA AHRYTLEQGY  
PVLAFQMKADAPADTVANAANPAFRTMLMHAITSVSWAANATNSEILSDMEFMTN  
TILGSWRET CPESGAYMSESDILEPNFQQAFYGSNYARLYSLKQKYDPYGVLYA  
PTAVGSEDWTVASADGLPDQNGRLCHV

>4169\_t gene=4169\_g

MDTSKMTVKVASAHNISFLATGGGGHGV SQGFANIQNEIDIDLSKFKTVDLDFKRNQVTV  
GAGTTYGQFYDPLYDAGKEIPTGNAPCVGVIGATV GAGVGLLQGLHGYTSVALISARIV  
TASAVLFEASATNNTELFWAIRGASANFGIITSATYRVYDATNVGQAQNAD FVDPETAN  
RSVWGTLQTFDKLPAELSVTISSTYNQTSVK TTHQAAIIVNLVYFGSYDDF

>4178\_t gene=4178\_g

MAIRLGLLAALWSASIWKTTMAQTSCAAQWAQCGSGSGPSCCQSGSSCVSLNSYYY  
QCTPTTQVSSGSSTGTGGSSATSTTIPGSSYTSSTSLSTATATQVPYPAANSSDCGTSWAL  
VDNVCCPYCTSNNESETCGTSCSGGCSSPDSSMCKSGTMWGEQTTVGSDETWHYSRS  
THFGLTSGGACGFGLYGLCTKGSTTASWTD PMLGDTCDAFCTAYPLLCRDP SNVTLRG  
NFAAPNGDYTTQFWPTLAAEGNPDNYLSCGECFELIRTKPDGTDYAVGEAGYTPVYL  
EIVDSCPCDANPKWCCGSGADHCGEIDFTYGCPIPKDSHHMDLSDIAMGRLQGNGLAE  
GVIPIRYKRVPCKPGNVYLWIRDGAAPYYFSLAVNTNGVGSVNVNIEVQSGSQSSWTA  
LKRDPNYSRRPQERYGAWVVPQSGPFPVPLSVRITSPDGQQIVSTNLINSFTPPASAPS  
GFWYVDTGVQFT

>4179\_t gene=4179\_g

MFSLNTAFIAATLAVGVLAPVAVPAAVTKRNTPNSSGINNGYFYQFWDGSSGTTTYT  
NGPAGEYSVNWQNVGDFTAGKGWQAEPRNIFSGSINSGGNFYLA VYTWSTQGENYI  
LEDYGTYNPCSGGTSKGSLSYSDGSEYQVCLVDRGN NYLQNW SVRQNKRSSGTVTTANH  
YNYYSQSGMTHNPLSSAAYQIVSTEGYGSTGSAVITVS

>4215\_t gene=4215\_g

MKIQQLLIYSFTGLSWALQPVP RDSLPTVVLDVGTIIGTRTTVPSSIATVNKFLGVPYAQP  
PLGSLRFQPPVAISEFGGPIETTQWKDA CLQQFNYP IAERDYVMQVYGAPFGLGPPGESE  
DCLYLVNYYVPETASTSKAVMFWIHGGQIAFGTASLPYD GSGIAANQDVIVVTINYRTNV  
FGFSNSPQVNVTSNVGYLDQRLALDWVQRN IASFGGDPKKTIFGESSGASSVDRLLTTII  
KNPPFRGAIEQSGQATVTTPTVLTGPSAWSQLVDG VGC SKATDELACVQSAEATVIQNYI



EVNSLGFTTVNDGGITQLATPLISARLTGQAANIPLLLIGSNGQEMRGPLGFLVNGTDFDD  
HSFLTYVHGLFPASAILDGLITAAYSIAEDATVALFDVLTGILTDVSFTCPARIVSITNNA  
KVPTWRYYYNATFQNLQPDIPGVPDLGSYHSSEIAMVFGTYPRKNATVQEATLSQFMQ  
KAWADFAKDPTAGPGWEEIDSAGNNIACLGCGNDAGAQLIESSAIDENCLLLNALYP

>4216\_t gene=4216\_g

MTLQPLVSPPTFEHRRDGLGIGTPTPRISWTFSYPPNSNELGRNWTQRAHEIEIKRSWSSA  
TAIAFNETSQSVLVPWFPDPLESGASAEIRVRCYQGQKEDITDWSPWEMVESGLFENQD  
WVAVPISSATKFQEDGLPLRPLRFRKQFTLSFENDEIKRARLYVTAHGVEVHLNGSRV  
GNHVLAPGWTSYHHRLLYQTFDVIDKLLSGENTLTVEVAEGWFAGKLGIRGGKPFNYG  
CEVAVLAQLEIITMNDKVVVKSDSTWKCSSSAIISSEIYNGEVYDCNLEHRGWQSTMFN  
DSQWAEVKEVPWPASKLLVASDAPPVVRTQEIRPVAIITSASDKTILDFGQNLVGVVRIN  
KVPAQSSITLTHAEVLDNGELGMRPLRGAKCRDVVITSDYEILNWSPKFTYHGFRFVQID  
GWPAGQQVALDNFTGLVIHTDMRRRGWFECSSNMINKLHENIVWSMRGNFVSLPTDCP  
QRDERLGWTGDIQIFSPTSNFLYDCTGILSNWLDDVSVEQLARHDKIPGLVVPNVMEDF  
WTPTPQAVWHDAVVLVPWSLYQSTGDPSSLKSHYSGMKAWLSQAIQRNPDKLWSADI  
WQLGDWVDPAAANEPGNSRTDGTLVADAYLVYVTSIMSSISEILGFQEERKRYASDFL  
ALKKAFHAKYVTPGLNASFTQTAYSLAIQFGIIDDIDQLAGAGNSLARLVHLAKFHVST  
GFVGTPLILPALTAGFSSLAYRMLLEKHCPSWIYPITAGATTIWERWDALLPDGKLNPG  
QMLSFNHYAFGAVGAWLHRTVGGINSINGWKTIQVRPVPGGGLDYCAVHFEGPYGLVE  
CRWEITRDIFKLRLSIPPNTMAEIQLPQVIEVETPRFSIGSGSYSFDYKYKALDWPPRVP  
GGPPAL

>4219\_t gene=4219\_g

MILTSIVGALLQSAMIVMGEQSSPSTSSSGCGKALTLHSGTYTTTVNGKQRQYTLTLPQ  
GYNPSEPYKLMFGYHWLGGTMQNVVSGSYGIEPLAGNSAVFVAPQGLNNGWANSGG  
EDITFTDQMLSTLENALCIDKTQVYSMGWSYGGAMSYALACARPDPVFRAVAVMSGAN  
LSGCSPGSQPVAYYAQHGVSDSVLPFTLGEQIRDTFVKDNGCTATNPPAPAAGSGTHIKT  
EYSGCSSGHPVWVWAFDGPHEPLATDAGASSSWTPGQIWSFFSQFF

>4220\_t gene=4220\_g

MVLPARRLFGLGVKSVLAVLTSVQASSMCNGNNVSAPATNYNASYNYIGCYLDPNVSIL  
TAAKLSTIIMTPEYCTSWCGQKGFAYGGIEFGTQCFCGNTPDFSSSTKTNDNSNCSKCVT  
EPSSSCGGTYVMSLYQILNPQGSTANTGFVPVCQTSPLCSHKVCNTLSISGRIKSLVDSL  
TLEEKILNIVDASAGSARLGLPPHEWNEATHGVGSAPGVQFTEKPANFSYATSFPAPISI  
AASFDDDLVRQIAGVIGKEGRAFANNGFSGFDFWAPNINPFRDPRWGRGQETPGEDSFV  
VQSYIRNFIPGLQGNPPEEKQVIATCKHYAVYDLETGRYGNNDYNPSQQDLADYFLAPFK  
TCVRDTGVGSMCAYNVAVDGIPSCASEYLLEQVLRKQWNFTAEYNYVVSDDCAVTDI  
WRYHNFTDTEEAASVAINAGTDLECGSSYLKLNESLAASQITARSLDRSLTRLYSALFT  
VGFFDGGKYSGLDFSDVSTPEAQALAYQAAVEGMTLLKNDKNILPIHSSNDYKSIALIGP  
FANATTQMGGDYSGIPPYLISPLQAFENHSEWEINYVGTGINNQAAGFASALAAAKKS  
DLTIYLGIDNSIEAETLDRSLDWPGNQLDMVTQLSNLHKPLIVVQFGGGQLDDSSLLR  
NEGVQALVWAGYPSQSGGAALLDVLGTGKKSIAGRPLPITQYPANYTDQVSIFDINLRPAL  
NGTYPGRTYKWYRGNPVPFVGYGLHYTHFDWEQTLGHGYNIQDLVASCQSDGPIND  
STPFASIKARLKNVGSEASDYVGLLFI SEDAGAPRPNRSLVSYTRIHDISPGSKATLEFS  
LTLGSLARADDKGNLQIYPGKYKIALDISESLTFEFLRGSPVVIDTLPMPDSHYDFTVPV  
HIEPPSTEAHS

>4223\_t gene=4223\_g

MIENSIAQDPAYANVLPADFVQGFSSASYQIEGGTNLGGRGPSIWDKYLHEAGKDTGDV  
ACDSYNLWKQDVALLKQYKAKGYRFSVAWSRIIPDGGGRNDPINEEGIKYNNLIDALLA  
EGIEPTITLLHFDVPLKLHERYGSFLAEDPTNLIADDFVSFSKLCFERFGDRVKKWLTFNEP  
WIFPSLLSMGMIKDFSKKNFFRVGHNTLLCHGHIVRLYRTEFQKKQEGKISIALNSEWCE  
PVNDSTEAVRDAKIAIERTFGWFARPIFLGTQTDSDWDHYGEEFLLSEDELDLLRGSADF  
MSLNHYGTTWATGLDVQSDGDPRFNMEIDK TWIKDGQVIGKRGEEGHPHIVPWGFRK  
LLNFVWNTYCKDSNLPISIAECGYAVEFEQTMSLERIVDDKDRQDYLNQYIKALCDATK  
EDGVWISAFYTWSSLLDNLEWLSGYGPRFGVTHVDRDNGCKRTPKDSTNLLAAIWEHTI  
KK

>4226\_t gene=4226\_g

MVYHQESYQLDAGPLGQLEGLTSLGSEPAVHYFGGIPYALPPTGEYRFRVPRKLPKGY  
SYGTRANPGRFAGGTGICPQPGSRNPPDKTLFNENCLQLNIWIPAKAGPDGGWPVCIYFH  
GGFLQVGTANWGATSLVPFLHESSFRAMVLPFRLNALGFLTGKELAAEAENGEVPG  
NMGLWDQRAALEWTHANISFFGGDPANITVAGYSAGGFSAFQQLGHELYRVPSTKGFJK  
RIVMFSNGPGITPKTLEEQQSQFDEYITRLGIPLGLPSETKLDMLRSLPYQKLEIVQTMKI  
HEFRLLSNGEFLPKDLMKSVNDGDFAKNMSERNIKLLSGECRDEHTIYRTWRTPDNSFD  
AVYARLCAEYPETTAKKLMTHYCGPNKELPSACDNWKVLFHGIYANIQVHALQRGFHD  
ALFRGGLPGKDIFRYRFDKRLECVDETIPVEWGVTHSSDVPIWFWGANFSGGLTNQEK  
KWLKDWNEGFAFVKGQDQVEWGPSSPKEMRRWRSDGETDVWEDDQWEKGLKVDL  
LTKP

>4252\_t gene=4252\_g

MVGRRRPTRLTAVAGLAGVVIAYVYAATRIVAFELFGIFKDHAGVRHAQAEIAARYNS  
SGSDSRSPVVPKIIHQIFHNWHDENNDTIPAKWQPSRQSCVDSNPEWEHMFWSAKRSEK  
FIEKEYPWFLSTYKSYRYPVQRVDVIKYFVLRHYGGIYIDLNGCSASLEPLTYPAFTT  
DGGLGALSNNIMGGKPGHPFFVIITENLMRWKLDYLLPYVTVMMLCSGQWFLTAMWEK  
YHSDLSPDGTVRGFANAGTGWKPLDRILMDMRPGADPWVFFTVAGESWADWDYRIL  
KVVGDYIVLILVMVVFICALVRFCMKYRARSPTTCIEYQKLDLDR

>4288\_t gene=4288\_g

MIGLANLVATLVVTASLVTTVVAQSTADILSQLQANGVNITLLNSTGTLATRSQNGCSL  
LSYALVTLFPSKTLISSESGFANWTESFWSQQQEEVTPQSIFKPANAIDVSSAVLLAELFSC  
PFAVKSGGHAAFGASNIQGGLSIDLGALDSITLSKDQTIASAGAGNVWVDVYNYLEPY  
GLSVIGGRVSTIGVGGTTGGGSIFFSQEYGWACDNVVNYEVVLASGLIIEVNQLSYPDL  
YWALRGGGNNFGIVTRFDLSTHVQGSLSWSGLIYLSYSDQAIDAFYNYGINAASDPKS  
AVIMNWAYAEGQFLAVADLEYANATVNPPIFHNFTAISTYENTMAVRTLPEVTAMFQA  
ANPDGLRESYWTATFAFTKEMITFCVETFETEALRAANATGYLPALVLQVISTDMTTQM  
QKNGGNALGLSPSDGNLLLLNLSFMWGDIADDNLILNILGTITSKTIAYAKANGLYNEYL  
YMNYSQYQAVIPSYGTANFNKLSVSAKYDPFQVFQKLQPGYFKLSTAAPNTTYP

>4297\_t gene=4297\_g

MVRSTILATVALGAQLVHGQYIDEQVYVSPNTTGAGDWHAAFLRANSAVAQLNITEKA  
FLVTGVTGPCVGNIAAIPRIGFNGLCQDGPLAIREVSYASVFPAGVSVAATWDRDLLYQ  
RGVDMGAEFRGKGAHVALGPVAGPLGRSVLGGRNWEGFSPDPYLTGISFAETIKGIQSQ  
KVQACGKHYIGYEQETQRNPSTYPNGTTEQESVSSNIDDRTIHELWLWPFYEGVKAGMA  
SIMCSYNRINETYACQNSKTLNGLLKEELGFQGYVVSVDWGGTHSGLDSALSGLDMMP

GAIDWVDSAVTSYFGNNLTTMINNGSLSESRLDDMVKRILTPYYYYLNQDSEDYPTIDLD  
TAQISYGLFGDDLPSFSYSFNVGNSLNINRDVVRGNHRDLIREIGGASAVLLKNTNNILPLS  
KKIKRISVFGNDAADLSGGPYDPSNTNGVLA VGGGSGAGRFTNLVAPLEAIKHRNPQAL  
VQYVTDNTLLTQDPSSTLDTVYPAADACL VFLKSYATEGYDRTTLIADDNSTALVEAVIS  
YGGCPNTIVILHSVGANLLPWADNANVTGIIAAHLPGEQAGNSIVDVLFGDVNPSGKLPY  
TIAYNASDYNAPIVNFTDVDNSDANLWQSNFTEGLLIDYRHFQYQNTPRYEFYGLSYT  
NFSISNLLVSTNASHVSATPRALNGTVAPPGNSDLYTVLSSVQVTVQNIKLAGRAVPQ  
LYLSFPSSQTNTSDDGLPTPVKVLRGFDRTNVLYSGQSVTLTFNLRRIDVSSWDVVRQE  
WVPSGTFGVLAGWSSRDPLSGSLTLL

>4317\_t gene=4317\_g

MKLLFLLSNLAAFTSLASASLKYRGADISSLIVEEDDGISYKNTNGASAKLETILANNGV  
NTVRQRLWVNPSDGIYGLDYNLKLAAARMVDAGMKIYLDMHLSDTWADPSHQTPSGW  
STTDIGTLAWQLYNYTMDVSNFSAQNIPIEIVSIGNEIRAGLLWPLGSTSNIYHNAQLLH  
SAAWGIKDSNLATPKILIHLDNGWSWSEQSYFYDTVLAEGPLLTTDFDLMGVSYYPFY  
SSSATLASLKSTLAEMASTWGKGLIVAETNWPYACPNPAYSFPSDLKSIPFSAAGQTTFL  
KDVASVVAGTANGLGLFYWEPAWIGNAALGSSCSNLLVDSSTDVFRTSVEVFSSI

>4336\_t gene=4336\_g

MGEHHVKDVAVLGELTLQEKINLLSGTDNWHLYGIERLGIPAVRVSDGPNVVRGTMM  
FNSTPAACLPCGTALAATWDVDLIRRSSELQAEALAKGVSVILGPTTNMQRSPGGRG  
FESFSEDPVLAGCMSAAVISGIQSKGVAATLKHFCNDQEHHERMSQDSLVSERALREIYT  
LPFQIAQLQAAPWAYMASYNRVNGTHISESYDLLQGIIRDEWGFGLIMSDWRGTYSTA  
KALKAGLDLEMPGPTLMRGSLINHALVCGKLTDDIDISVRRILAFINKVQPLRIPSNASE  
MTIDTTETSQRLEIVAASIVLLKNENSVLPRFKDKSIAIIGPNAKIAAYSAGGSASLHPYY  
AVTPFDGISAQAQEEVLHAIGCTAFKKLPQITEIHKDMKMFVYATSSSAGTSRQSIDEISIA  
NADMYLFDYVPKLLPHDHRGAWYADFIGTLTPDADGEYMFSISVAGTAKLFVNDKLVV  
DAMTEQVAGGSFFGYGTTEIYGSILNKGSSYIVRVEFGSIATSLPFGADSVTGGGIRIG  
CQFQMNAEEELAKAVEIAKQVEQVVIVAGLNADWESEGYDRDTMDLPGHTNKLKAV  
LAANHNTAIVIQSGTPVTMPVNSAPAILQAWYGGNETGNAIADILYGDVNPSGKLP  
FPVQIEDNPAYLNFSGSEKGRITLYGEDVYIGYRWYESVKRDVCFPGHGLSYTHFTIDNLA  
IKVSQGDRLAITVVVENTGNYSGAHTVQVYVSQHNSIRRPVKELKGFVSKVSLAPAER  
KEVRISMSLKYATSFWDERKHAWTMEKDTFDVYVGSSSADKSFLKRSFEISKTAWWKG  
L

>4363\_t gene=4363\_g

MAYGPFRRSGSSEICLLFESQCDNLDESVLHIRRAIKEDETLAFLIDILAEPLSLWSLYTEAD  
PELSQISGDRQLAALNEVVQQLPSSAVKATNLLLTPVTVIRQLVDFMMLAGSTIHPAFG  
SSSVKPGTNTDVGFCVGLSAIAVATSRNEGEFQNIASKVIRLAVYVAVVDLDERLS  
GSHSLAIRWRSPIQYVKLQQLNENSAAYVSCITDSNNVTITPTVTVGSVIENLRNFGLT  
VQAIGLKGRFHHVSYCDKVRILSALCDRDDRFLPRGDTLALPLRSTANGKVIKQDLLN  
KVALESILTSQCHWWQTVTAALGDSQKEVRVSVGNKSCVPRSVRGQMLESTSELVKQ  
AISCTQSENKHIAITGMAGRYPGADSLEELWELLELGKCCVREMPDERFKFSQLKREP  
GPFNGNLLARPDAFDHRFFGISNREAENMDPQQRLLLQVAYEAMESAGYCGLDAADLP  
KDVGCYVGVGTDDYTGNVGSKHANAFSATGTLQAFNTGRISHHFGWSGSPVVVDTACS  
SAAVAIHLACKALNTKDCSIAVAGGVNVMTPQVSQNLGASFLSPTGASKAFDASAD  
GYCRGEGAGLVVLRPLEDAIRNHPILAVITGSAVNQGSNCSPITVPDSNSQRALYSKVL

DRSGISPDEVTYVEAHGTGTQVGDPIEFESIQKMFSPRRTEKLCVGSIKDNIGHTETSSG  
VASLLKTIQMIQNQRIPKQANFVRLNPKIPSPQHSGIIPTKSMTWASSERVAMVTNYGAA  
GSNAAIVLKQHTPPSTRTNIKLSHVPVIITAKSAESLQDYCTALYQWLIRAQPAQDVAY  
NLAVKQREMDFFVVSMPIMADTDLLTSQLKSISSPTSRTIQKRVSKVEMPVVLFCGGQS  
GNRVHISQELFNESSLLQMHLMACENTGQLLGLPSLFPTIFKSEPITNIVHHHFIQYA  
CAKSWIESGLRVDRMIGHFSFGQLTALCVCGTISLSDCIRLISHRARLIQTHWGLETGVML  
AIEATEQEVRELLLRIVNAPDVACVNSNRNVVIAGDESSIRAVEELDCNYRMRRLENTHA  
FHSRLVDSIIPALTTVAESLKYHNPSVILEACTLTPEDWSSVTPKQIVQHSRNAVYFRNAV  
ERVAAHTKRPSIWLEAGSGSPVIPLVRRVLEIQSSSSSQGHYQATDLSGTFALRNLANVT  
STLWLNQSKVQFVFPFHSSQSCAYNWLSPYQFLKTTHWIDYDPRAFVEAPILNQSLNG  
RTELQVVLGKGNDFKFKVNRHALYQKCTKGHAVVDQSLCPASMYMDIVVTAATAAV  
LPSELSRGMTQFEDICISSPLVLEPQEQVFLSLSRVTONKEQWAFVLFSGKQKNQDNSITH  
STGRISFHAFDKPSKVLTRFDHFGRLVTKDREKTIADSSVNGLVGKMVYQAMNRVTYV  
ADYYQGVQVQLANGHEAVGRVNLVNSLTKDRACDPILLDNFLQVAGIHVNCISEHIDD  
QVYVCSGLSEILLGQAFIQRDEHPSSSWLVYSNYSRQSQTVACDIFVMDDQTGKLALAI  
FGAAFTRLSIRSLTRTLARLNTEKLSIPKSTSIELPKPTVPLNLYQIGPLTPLSESVASDN  
DILRRVQEMLCCEMLGVTIDEVASSASLNDIGVDSLMSSTEVIKRFNVSISNGDFAQIV  
DVQALVRFILPPDMSLQTTDVESQPEFGPKPVYMNHTSPQEEGLSNGVVTGVAFLAQ  
NIFVTSRFDISFGAETNWNFGCRDVYPQQMALVTAAYVVEAFESLDFSLEAFSSGQVPLI  
PVISRHEKLRKQLYRILEYSDLLNQSEMGDYRTQTPIPTISSTLHEEILRDFPQHESEHR  
LLHKTGPHLAACLTDADGLSLIFKNAEALRLVEDTYTLAPNFKSATMHLTQYLCEIAE  
KFGNQREIKILEIGAGTGGTKYLLEQLTAVPGVRLQYTFDISSSLVKLARKKFQSYDF  
MHYTTLDISKAPPADLQGGQFDVVLSSNCIHATRNLTESCTNIRKLLRPDGILSLIELTGNL  
YWYDLVFGLEGWLWLFEDGRQHALASAQHWQILRQSGYKWDWTRNDLAESNILR  
VIVASPSVGQPPIDEEAPLLTQETVIFDEKDGQLSADIYYPESIDHDGESRPIALMIHGGG  
HVMLSRKDIRPAQTKMLLEAGFLPVSIDYRLCPETSLEIGPMRDVLDALCWTRKLPHIA  
LRRPDIRPDGERVVAVGWSTGGHLAMSLAWTAEGRGVPPQAVLAFYSPCDYEDTFWS  
QPNFPQNDAIYPVGGYDLWEGVFEPKITSYNPPQALGGWMAPNDPRSRIALHMNWKG  
QALPILLQASKHRKQLQACNGYNSDELLPQPSQEEIKAISPLAQARVGLYKTPTFIIHGTL  
DDLIPYQQAQRTHEAIVASGVDAEIRILDGTLHLFDIYPDYENNLNAIKAVADGYEFLRR  
HVQ

>4371\_t gene=4371\_g

MSPQQPPRWRPLVINPHTLPHRQTFIILHDRGSQATDFGPALLFRPFHRSRNASNTQYFS  
AQSITSLHSAPFYAKFVFPASLLRAANFTESVINQWFDTHWPLTGDNEYNSRNSLDEET  
RKWRSELPIGLRDATRYIHELKAEIEILDGDAGSVVVGGSQGAASLISALMWEGDPL  
GGWFGLSGWLPAEEITNAAQHEGEDVEKPSLEKGIATLRGKLGIPASSQTDDGAEQSAL  
NIPLFVAHGTEKTVPIALGRQMVDLSKTLGWSSHNLQWKEYHGLAHTYSENILSDMV  
KFLTERLV

>4372\_t gene=4372\_g

MATTPATQNVVIDTASLSPSTSSSIWDRVSNWVSENKAVVYTVAGIAVVVTGGTVYYLS  
TSSSKPQEPAPKSKNQRRKEKKAEIEKKAQESKAAVEEVKTAKVEDVDELPEVDE  
STVDSLSEETRKAYAAKLKAAGNKAYGSKDYNRAIELYGKAILCKPDPVFYSNRAACW  
NVLSEWEKVVEDTSAALAMDNEYLKALNRRRAIAYEHLEQYDNALLDFTASCIIDQFTNR  
QSRESLERLLKKVAEKKAKVIMEAKGKRLPGATFVGNYLQSFPRKSIAPALDSEDLEET

GKGQLRKGYLAMEKKTGEGYDEAAQAFEKALELGDLEFEGDALNQRATFTYLRGDA  
QSALEDLNKSIEIQPSLTQSYIKRASLHLELGNKDGAVDDFELAIAHNKDDPDIYYHRAQ  
LHFI LGEFAEAAKDYQKSIDLDPSFIYSHIQLGVTQYKLGSVASAMATFKRSVKKFETVP  
DVYNYYGELLLDQQDYQGAIEKFDKAVEMESKTKPTAINVLPLINKALGIFQWKQDFKE  
AESLCQKALIIDPECDIavgTMAQLLLQGGKVAEALKYFTRAEELARTEGEVINAI SYAE  
ATRTQLEVQEKYPLAARLQTMGAGFGGPPGM

>4386\_t gene=4386\_g

MAPSKPAIDDSQKAMFHFFKSEWDFELVRLGFAFYEGAEIAEVLQAVGSIRD SHPESW  
HAAWLRAGTKTEALAE EAERTGDRVTARRAYLRSSNYIRAAQYMLSSRPGHIDRRVLP  
LERAISNFQRATSLMEGDVRIVHIPYEKKVKLPGYLPLANKRVTEKVPVLINIGGGDS  
TQEELYFINPVAGVEMGYAVLTYEGPGQIVLRREELTMRPDWEVVNGKVLDFLHTYS  
NEHPELQLDLDRVAVCGASMGGYYALRAAADPRVKACVSIDPFYCMWDIMKGRMPEF  
LIHMFETDGGFAPDGGFNGLVGFLQWSNFQARWEFNHLKTIFGVEQPADVFRMTMTYT  
LSRPDDHEYLEQVRCPVFVSGAAAALYAKPEFSTERIYRALGHLHEDQKCLKWLANDAA  
QGG LQAKVGAFLSAHRTFTWLDQQFGIDRKIVLSDLGSLSSIDQ

>4399\_t gene=4399\_g

MVSKKEKKIINALQANWIWIPNWVDSSSQNTV GKIVHFVRQITLASPPTRANLYVSADTR  
YKLFVNGERVA VGPTRSSPLIWYYDSL DIAPYLKPGKNDIRFSVLRYFACSRGAMAFERT  
ALPGLTIVGYVEEAGECTIDLGSHQGWKATPDES VQFPSGLADDVFLHINERIAPTDPGIE  
VTPILYGIKTLNGDIAPWALNPRPIPLPEATPAIVNTVRACESSFTPDDWTAFLLDGHPLV  
LPQGSSHVIEMQANCHSTAFIRWNLKASSK PSEIKFKVTYSEGYELEPRSPFFRSKADRL  
DAENGHII GPYDEVVLKVSETESFYEPFWFR TFRVFRLEIAVGKEPVELKSFQATQVNYP  
MAIKASWKETGNVHSEIWDVSIRTMRNCMFDGYS DCPFYEQLYSGDTRSVGLFHYL  
LSGDDRLMRQAITNFAASVTPSGLPQSRFP SHSKQIAGFSLYWVLQICDHFLYFGDRSFA  
RK FVPRIDGVFEFFDSHIDELGLVSGIPEE IWQYVDWVTTWGATDEHPDKGVPTSGRKS  
N RHTYFSMLYAYVLRKAADLLRHIGRAGNAEEY EYRAAKVLESIRRHCFDGEFFTDSTAD  
IADELSYSQHCFQIFAILSGAATPEQHEHILSESFTNPRFSKCSYMMRFYAFRALAEAGGQL  
YNDFWTSMWAPWRQMLSNLSTWEEDDVRQRSDCHAWGSVP IYECTELAGVRPIAP  
GSSKIIFSPRLGLSESIDAKIALGVNNIAHVS WSPGNKNEKIVELRLDQPIEVASQLPGGQFI  
DHGVVSHISLVYTPPKVGT

>4400\_t gene=4400\_g

MAHSIFSSSLLLWGVAAATLFTVPSSPPSNSSKQLS AAPVGVSLFFAFPAYMDSVTATT  
TCLENLKDLTGTWPPLRIGGTTQDRATYDPSLTQAVSYTVASATDAPTS LTYGPSFISLA  
ASYGGEIILGNRRLNNISNTIAAAELAQSQATKLYAIELGNPNFYSSSDPIAGGASWTA  
AADYASEVQWQDEVCGNLSVTDRISAGVFFGTSPMSIAGLTAVEGTANNYVKTYCSHN  
YPQSASTANLATLMGHSNIKSQISGFSSEITAAANVGKPHIFGETNSATQGGGGISPTFGA  
ALWILDYIMQTVILGTQALYFHQGTIGNCQYCWWGRYDMGAPYYGAYFATLALAGAD  
QIAPLDSQTTAYAAAYAIYSSGSPVKALLYNSDYTTGTRSSQTFVLSGLSGSTVTAKRLT  
APYATSRVDQGGNPTVAGQTFANGTCVIQGTQTVETATVSSAKATFTVSASEALLVYL

>4413\_t gene=4413\_g

MSPFPSPNFIIQLLAGALPLFGGLTNQQTNGNLNASSWQNLPEFLPGSPLHHGYPWGNL  
K YQPDVTNEPIPETNVTRYHYHFDVAPGTLAPDGYQRQMLLINGQYPGLIEANWGDWIEV  
TVSNSLQDLDEGTSIHWHGLRQYGTQYADGVPLTQCPIAPGSNFTYRFRADHVGSSWY  
HSHYSAQLTSGLVGPMVFYGPKSAPYDIDLGPVLLSDMYHPYERLVEKVNGNGSDVH

FAFSNNSVINGKMFVDCSSVTDGTPCVSNAGVSKFQFQPGKDHLRLVNVGSSGLQFFTI  
DEHDLTVIANDYIPVKPYTTNSVTLGVGQRADVIVRGKSGADAERNYWMRANLSVLCT  
LPEQPYGLAAIYYDEKDYEDGKTPSTPQLIDADMPCSNAPLNTTSPVTRIPAPPADLTL  
TIHINNTKNETGHPVYLLNNQTRVNYNEPILDLAEGIFYYPSPDEWNVYSTGNSSVVRI  
VWENQKVDPSDPNFYNLTFTHPMHLHGHDYQVLSYGFGEWDGTIINAENPIRRDTLLP  
ASGHLVVQFTTDNPGVWPFHCHVAWHVSTGFLINILERPDDVKGQPRIQKTIDQTCAAW  
DAWSHRNIVDQIDSGL

>4435\_t gene=4435\_g

MKTKMLVSSLIRIVLWLTALVSHVQGQSSCVVDYSQYVNAFMGSEGPTPGDGFGGGDIF  
VGGARPFVVKFGLDSTAVNWTAVLNGGWTPKGNVTAFTMMHESGTGGAPKYGVIP  
QMPLTSIEAPVNLDDNQTYAQRVGSDIASVGYFKTTLQNGVVVELSASRHAGIIHYSYP  
SGEKYILIDISHYLPSPGDSGSQFYVVGGEIEINPNGKSYQGYGTYYGGWNNGAPYTIYF  
YGEFSQAAQSAQIFSGENTDPMRYQNLANGGIPETLYGNSSTTKATSGPMNARVGALF  
GWNNTTTTQNITSRIGISFISIDAANSYIGLEIPTWSLNDTVADAVNEWNTDVFISKIRVST  
DSSANITNLRLLYSSLYFMHLMPSDRTGENPLWVSDEPFWDDFYTLWDIFRCTVSLYHV  
LQPSYYESMIRGLIDIYKHQGYLPDGRSGNWNGLVQGGSNVDNLADAYVKGLRGSIN  
WTEGYAAMVKDAEVPYNTFDPTDFTASTKEGRGALDDWKELGYVSVVDHNTRCISRT  
VEYSLNDFALSQVA AEIQPADKAIYLNRSAGWQLIWNQEVTSLNFTGFLAPRFANGSYQ  
SDYDPLYCGGCEWSSITYEGVPWEYTF SIPHDVETLIDFMGGPATFESRLDKMFEPGVSK  
QNLGANGAGITLMNIGNEPDFGTPYLYHYINKQAKSVQQRNLSNTYFKDAA YGIPGN  
SDAGAMNSWLLWQLLGLYPIVTQPNYLIGSPWFPEINMTVNGNKT LHITATGLDYKEGS  
YYVQSVRVNGQEWARNWLTHEDIFVDGGSVDFVLGKNMTLWETGDVPPSPGHVTL

>4479\_t gene=4479\_g

MLREDSLAI DCIYSHAKSDNSQP VNFQ TGVIVDGMRF TLHGKNVSYGFHVGSNGDLIST  
HFGGRIDAVIPNDLLPIVNGWWSGMPDCVRREFPDHGRGDFRSPAIRICHGNTHPIALTYK  
SYEVIKGPALPGLPSTFGSEKDVTTLVIHMYDDNSDIAVDLSYSVFLDFDAIVRSVSITN  
KGTAPITVEEMASFSVDLPYDNYDMVGLRGDWARETHRQRRRIDCGTQGYVDAVAHD  
RKSLKFIRGFL

>4489\_t gene=4489\_g

MTSLRWWSVALCAGLGRAVGTGGSTSGDVTCTDITVSTNLLSNPSWEDGLSPWSYYY  
PRTVTTAQASDGSQSLTSGVYPFQYIYQTVSGLVPGTTYQASTDFKIVITNAAIQESCSV  
DLYHDSATTANLINQKTAIYNMATSSQWLTLSGPFTATAESHVFGIYITCSPYRVSQVAIY  
VDNAKFLETPQVCTTMTPTSTPSSTPPASTPSTQPSSPVSSIASSSPVAQSSSAISIPTSTP  
TLQSSSAVLPSSVPSQTPSASTPVPKPSSSAPIIAPSSPILQSSSAILIPTSTPTLRSSSAVLPSS  
VPSQIASASTPVPKPSSAASSIASSSPIARSSSTPTSIPVASHTSASSRSRQCIKHPSTSATPSA  
PPSVSSGSTSLAATTSTKTSTELQSTSTVASFSTTVISTELNQQPSATGPVEPHLTPSPIDLPP  
PTSSGQITPTNVALTTSTIYSTRTSTITACPSSVINCPARSQTTYVTETIYVSTTVCPVAEN  
EPTAQVTELASPTTVYVVTEKVTSLPTGIPFNSVSVSPIFSTRATFTSCPPNVVGC SANP  
AAPQVVTE TLLVRE TYTLSETAVATYTHPQIGSTASSRLLSSVPVSYTTLSVSSTLPHSS  
TSTSPSDVPAFNSAESLGR TSLAQIIVSVSIAGLALLWL

>4490\_t gene=4490\_g

MSTKYDAIIVGGGVAGLVAAARLSEDIKKILVIESGKDRRSDPYIDTPGLLISTWGNPVY  
DWCFWTTPQDALGGRQLPQPRGRVLGGSSAINATAMLYPCPRDFENWGKLG NWGWG  
YSDLLPYRKRSTKFFPPSTETS NLLGLNTYYQPELYGKQGPIAQSFAEDFGPFDTA FIEAL

DSTGHSKKSDPILGNQHGPFTPTSSVDPTNHRRSYAAEAYYSGMTEGRDNVEVLFEHV  
DKLILRESQMKNISIVDAEGVVTVDSDGNTTQIYGDTVILAAGSIQTPLVLSRSGIGRRDVL  
EQHGIDVVIDSPGVGENLQDHVYTSISIEVADGLTTKDAVRDPAVVAALVKEYNENQSG  
PLASVPLNYAVLPPVDESGNVSTRKLEELVKEYGEWNEARTFALGIRAQLAELTPMLLD  
KQICALYLGALAAQSVINPDGKTSMAEAHSPQHPENFLTISIGLNHPMSRGSVHIGGKVV  
ETDVKHGPPIINPSYLSHPLDQELLARGLQFVQRLTQSDALKKVLKPGGVLLPPTAADIS  
DLZIAKRVSRRERAWSNYHPVGT CAMMPQELHGVVSDRLV VYGT SNIRVIDASIFPMIPM  
GNIQATVYAVA EAKACDLFKEDWAARSS

>4494\_t gene=4494\_g

MLITNIVRAFLAFSRVVTTSRVCETTACATHNNFAPEDILEGKDGLEPHPLQPFYRYPV  
YPVTKENGLEMNETHLNYWEGKYFMYSATWGC GGSIFVYANPPDNDYPPSPVYQPG  
DYGADGNCGIKTYSSSDLTNWRENFYQPLSSIANVTKPVVRYSSSTGKYVMFMGGAG  
LRGIYYTTSFSPSPGWSSPELLQGQYLSHDFDFVETPDGTHYIVTDPFTGRITNPDQAVP  
TWDI WVQQLKPDLTATVNTADTMALIRASQLIAQNL SLEAAGAFYKNGHYLLTFGMT  
CQNCAGYIYYYYSTSP LGPYQDGGFLSLDGC GGQNKGANVLP TPNNGT VVVASVLGYR  
TSQTNYVFHQGPEGYIWHGDNQQAASSTFLYPIEFNDNYTIKPF TCAARVRIPLMTDTGS  
LSSPPPYQLDCRIRNWQNEISYAQAKESSILEFPVWQR TDNLGPTS NAGPALDGP LEIVL  
TYVNLNDIFTWPSSNISWAPAKIYMDTSYNQIYKITLKT NATNGCYGTIVKPKTDPLSS  
YGARVLGVLSEQKRAELYVYQWQRN

>4504\_t gene=4504\_g

MAEWLLFLTAAWSILRSASGLPTWSPVDELEDIMFLNTGYQARAFSAAITPCSFSPQGP  
TRISSAEWLRTAFHDMAPGNVFTGVGGLDASLQYELGGDGENIGTAFNTLLSFTPFSS  
SRASLADIIAMGVYASVRVCGGPTIPIRTGRV DATAAGPIGVPLPQNSQYTFIQQFSRMGF  
NVSEMIALTACGHTIGGVHAGNFPEVLQSGTVPNDYQHFDSTTIFDEKIASEYIGGNTSDP  
LAGPLAVKNTYDS DIAVFTADNNATISLMADPTYFQSRCQV MLQRMIEVVP PGVLLTDPI  
TPYEVKPSNLQLTIQPGGTELQFTGEIRVRTDLNGTISNVQLVYVDRNGASTCGSCVIST  
QYAGTANGFDDSF AFYFSSTLSATTSISAFTVQVTTSGKTVTYNNNGDGYPVQDNILFQ  
SPQSCIANSSDSNGNYKMTITAGVRNTTASQSATLSVEVKTPRSCCVVPLSTINVTMEN  
TATIGAYSLYIGTYDLTPNQITTSKFGVSVGAYSDFSFKNTAL TGSCAALSGSDPEAYSIV  
GCYTDNVNSR TLSASTKSDNNMTLLECSKFCSGYQYFGTEYTTQCFCGTTLGSSETQAA  
ETDCDMSCGGDSTETCGGPNRLSVYTNNNYITPGGATIPGYKYLGCYNDTAAARSLSGT  
YTYNNNMTVEACA AFCNGANYFGVEYYDECYCGNTLAVDSINQPVTDCSYPCSGNNS  
FCGGSNRLDLYQLGSDIVTTTSSPISSTQPVSTASLSTSVTILTTSTTVLTSSVASSVSTA  
SITSSATTISVSPVTSSTSSIDPPSSSTTVPVTLNNTSSTSLSTSATTTAPFIGWVTLGCYSDS  
VGARVLQNEGIVQGGPSNMTVENCEAACLAAGYILAGVEYSGECYCDSTIRNGGATAT  
DGYAQCTMTCNGNATEKCGGPNRLNLYQYTSPTSTTAASIVTSTTAVVSTTTNGTLGT  
TVTSTTTTSATTSATGLPSGWAYRGCYEDNIGGLRSMLVQENDNSTMTVESCIGQCLSL  
GYTVAGMEYSQCFDDYVRNNASLSSDSQCAMTCAGNVNEICGGPNLLSVYSNATI  
TVLPPPSVQTTNLPGSWVYKGLQDNVNNTRTFPYMTTYTTNNSATTCLSRCQEYGFQA  
AGMEYGEQCFGDTFDIGADVQIVPDSQCDLLCTGDTIHYCGAGNLLSYVWEGETPLY  
EWTYATGNNA GLYQFLIGGVVPLMTTVNINGKVTFLEKWTGPPNTTGAYELDFYE  
NDFNSAWRPMHVKT DIFCSAGLVLPDKAGRQLTVGGWSGVSTEGIRLYWPDGSPGNTS  
VNDWQENQAELS LQNGRWYPSGMIMANGSILIVGGETGSNGPPVPTLEILPTVGPTLYM  
DWLERTDPNNLYPFMGVMPSK TILAAYYNEARLLDETTFTQIRTLNIPGAVNNDLGGR

TYPELEGTMVFFPQYAPYTDPVRLICGGSTPYGGDAIDNCVSI EPDVPQNW TIERMPSK  
RVMTCISPLPDGTFLLNGAHQGVAGFLATDPNLNAVLYDPTKPVNQRMTVMANTTIA  
RLYHSEAILLPDGRVLVSGSDPEDATHPEEYRVEVFIPPYLLSGATRPA YTITETDWAYG  
GTYTITVTAGNVANLKISLIGLISSTHGNSFGHRTFFPAFTCKGSQCTITAPPDQWTSPPG  
WFQLFILDGPTPSNSSFVRIGGDPGELGNWPNFPDFTVPGV

>4506\_t gene=4506\_g

MDARNPFSDSAAPSVVASVGSSAAHGAQDSIDELPIRDSTYSRPPVKRRFKSYLLTG DYE  
RPWVNDKRLKRIRINNYI IWGFLIAGLAVSGYINYHATTQVSKHSYCLILDDDFSTFNPN I  
WNREVQIGGFGTGEFEWTTTDDRNVFVDQEGLHIVPTLTDTTPITAAEITNGYTLNL TQ  
AGGDGSCGTGTNEACSVRSNSTLGTVINPVRSARLNTNGSKSITYGRVEVVAKLPAGDW  
LWPAIWMPTNDVYGGWPASGEIDLSESRGNDISYANGGRDVMSSSIHWGPSSGLDAF  
WLSTRGKALRRDFTKGFHTFGLEWTE DHIFTWVDNPLQQVMYWAFPKNTNMFQRGQ  
FAGRTANNSLVTPNWSYTG RPNSPFDQSFYLILNVAVGGTNGW FQDGIGNKPWTDAGH  
GAADFYSMDQWYPTWGN GSSRGMTVKSVMWQQGACP

>4514\_t gene=4514\_g

MRSTATVLASAMLVATSVQAQQTGYGQCGGENWTGATTCVSGWTCTYLNDWYSQCL  
PASSTLTTTTSSKTSTTTTTSKSTTSKTTTSSSTSSPTSTGK LKWFGVDESCAEFGTAMPGT  
WGVDFTFANTATIGEFISQGFNFRI PFAMERMAQQSIDGALDTAYLTNYSVAVNYITSN  
GAYAVIDPHNYGRYKGSINDTTAFQTFWSNLATAFKSNSKVIFDTNNEYHDMDETLVF  
NLNQAANGIRGAGATTQYIFAE GNSWTGAWTWNTTNDSLKSLSDPKNLLVYEMHQYL  
DSDGSGTNAACVSS TIGVERVEGATAWLRANGKLGVLGEYAGGPNSVCQQA VTGMLD  
HLVANNDVWL GASWWAAGPWWPSSTWSSIEPPSGQAYVYYDEILQAYTP

>4517\_t gene=4517\_g

MGSIEPISSPLASQPRLKTIDWGSNGVMISLDQQGTILQLGFYHPTHG VVLVSPFEQFNGD  
KFYDPSYVRRYRARM TDWIKDGKNGYGLRVGDKKSAPEIYPEISRHRDHLTLTYQHTH  
GIQVQTIFTVDRHHVQQTLLSTKSTTAISTAVALDLGMSLNRASYGQLTEGGPILPES  
LNVFTTTSVNNTFSLNPNLGVAINGNFWTNRWDIQALKFEDTMKVMYGE PVKFQRNA  
DTLLLSADCPAILNFSMELPAFARQSCIPSLQIPTSRVWHIRESAAV TIEGNLEYILGNC  
MIPVSENSTCIITDHVALPLGWN RDNYWQVRFLLDAYDKLESV TDSFTSQIYKQKCYSSV  
KTHLNWAFRVSQRPHRFWHR SYIASGVPKDGPIFQLDQQCYPIIELCDFFDYTSGDVETK  
QFVEDILLKEDAISEIIGVLLARRDTTTLNLFPTDETPGDDPVEYPYH FSSHVLLWYTFTRL  
AKLVGMLGDRKGLETSWLKHLANETRAATIKHFVGFNPVTEKKMFAYLTDGACKHAF  
YHDANDIPTLFAQE WGFVDDVSDTETIETGTSLWRET MNFGLSPGNKGGYYDEGPFGGL  
GSVHTRGPWPLGYFQELVFAEMTGDLVARQKAWQKIKGVMFFDGLFSEAVDNHTGEC  
TSKAWFAWPGSMIGSALLRDRSGIVMDGRFKG

>4521\_t gene=4521\_g

MSESAKIVFQPIHDSIRKKLDPEYVKLHDKLLQYCAPSESETWSPDIRSRASLVAFASPKL  
VEVGNIADFNVGDYQVRVFTPKTETPSGGWPCFVYYHGGGWVIGGMNSENGFLTHICE  
YLN CVVVSIN YRHAPEHRYPVAIDDSFAGLKWVFTPDTATMLSINTKKIAIGGLSAGGGL  
AATVSMKAALDPEMVDKIVCQILICPVIDNTATVDRVWATSKHSPWLTPLRMTWYRNM  
YFRSEEETRNWDASPCFAPEEVLQDSPSTFLAIAECDLLAPEAFQYSKALQNLGVNV DAR  
IYAGATHSVLILAGLHEVGQKLIHDACSFLAKIFNVGYDRETALIFPQCAEE

>4537\_t gene=4537\_g

MAARLSTCLLAALAHNQSAVVTPNSTNYNSSLTIYNLNIPILPAAVTYPSTTKEVSGIVKC



AAEGNYKVQAKGGGHSYGNYGWGGESGEVINLANLNGYSYDNSTGYATVGAGSQL  
GSVTTALYNSGGRAVAHGSCPDVGIGGHATIGGVGPTSRQWGATIDHVVSATVVLADG  
RIVTVSETENPDLLWALKGAGGSFFVVFTEFVRTEAAPAGGVSYTYAFEGLNATAQAQV  
FKDFQTFISNSSLSWELYIMMVG LPTVIEVTGAFFGSLEDFNAIGLEQAFSITPIANVTVIPN  
WLDMVAIWATESENAEKPAYFYAKSLDVLDPALLSDDTIDSMFEYLTTTPDDALTYELE  
VQLVSGAMAEIASNATAFPHRDVLYWIFAHAATHGTVSNTTIDFLDGFNDVIYSAFPNET  
FYAYAGYVDPLLSNGPELYWADNLPRLKIKKEYDEHDVFHNPQSVPVGEGSGDCDW  
>4552\_t gene=4552\_g

MGESQCPAHQRVLRANVAGAGTSVRDWWPDRLKLNLRQHNPASNPLGEEFDYAAAF  
NSLDYYALKKDIQDLMTDSQDWWPADFGHYGGLFIRMAWHSAGTYRVFDGRGGGGQ  
GQQRFAPLNSWPDNVSLDKARRLLWPIKQKYGNKISWADLLLLTGNVALESMGFKTFG  
FAGGRADTWEVDEAANWGGETTWLGNVRYSGGKEGVDGKGVVSGDKHGSKDIHNR  
ELEKPLAAAHMGLIYVNPEGPDGNPDVAAARDIRVTFGRMAMNDEETVALIAGGHSF  
GKTHGAGPSDKVGPPEAADISQQGLGWSNSHSGSGKGPDTTTSGIEVTWTKPTKWSN  
NYFEYLFYEWELTKSPAGANQWVAKDAEAIIPDAFDPSKKHKPQMLTTDLRLYDPV  
YEKISRRFLEHPDEFADAFARAWFKLLHRDLGPRALYLGPEVPAEVLTWQDPVPAVDHP  
LINDDVAALKQHIIATGVKPSLISTAWASASTFRGSDKRGANGARIRLSPQREWAVN  
KQPWLSETLSVLETVQKQFNDSQSGGKVSIA DLIVLGGVAAVEKAAHDAGFAITVPFT  
PGRTDASQEQTDVQSFSDMEPIADGFRNFGSSTSRVRAEELVDKAQLLTLTAPELTVL  
VGGLRALNANYDGSAGVFTHRPGQLTNDFFVNLLDTNTAWKSAGSVDLYEGTDRKT  
GTKKWTATRNDLVFGSNAELRAVAEVYGS S DSKEKFKDFVAAWDKVMNLDRFDLK  
QKQFAPGHRL

>4554\_t gene=4554\_g

MSTGNQIPQEV DIVVVG GGTGIVVASRLAKADPTLSILILEHGP DVRDNPQIVNPALFIT  
NILPGSKTATFYTAESP YLNGRQVVVPIGGCLGGGSSINFLVYVRPQEIDFSWKTEGW  
SGKEMIKFFKKFENFQNA DPQVDTSIHGYGGELSVSEGSNAQDEFQRDFKACEAIGIEQ  
VADVQDFKTSNAVGK WNSWVDKNDGLRQNVPHGFLYPILDANNTGLQVATEVKVGRI  
IFEKESNRAYGVEYFTGEGSEPV I HARKQVILAAGALGSPQILERSGVGSSSLSQLNIPL  
VSDLPVGVSGYQDHNLVLCTYKSAATEEQ TIDGLLSGRLSLENAFKQKLTPERYILGW  
NGLDCFGKLRPSEEQIKSFAPSFKEL YDRDFKDHPERPMMLLATIAGYLGDHSTVEKQQ  
YFTCIPYTA YPYSRGSIHKSTSPFDAPEFDPGYLSDPADVEQMLYGYKLQREIARRLSHY  
RGPLESTHPKFSSASKASYEYVDNLSVEKGFPVPIEYTPEDDDIIRDYIRQSIETTWHSMST  
CAMKTRENGGVVDERLNIYGVKGLKIVDLSICPENVGANTYSTALAVGEKAATLIAEEL  
GITL

>4591\_t gene=4591\_g

MHSQYSFSAFALGLVLASSVRADAPCDIYAAGGTPCYAAHSTVRALYDSYTDALYQVI  
RGSDGVTNDIKPLSNGVADSSNQESFCSGTTCLISIIYDQSGRGNHLKQAPPGGAAQGPD  
SGGKDFLASAIGAPV FVSGSKAYGVFISPYTGYRNN DINGSITGDA AEGMYAVFDGTHY  
NDKCCFDYGNAETNSQDTGN GHMEAIYFGNGGYKGSNGPWIQADLENGLFSGGDRN  
VNDDNKSMQARFV TAILK GKAGQWALRGGDATSGSLSTMYSGRPSGDYNPMHKEGA  
IVLGVGGDNSDRAQGT FYEGVMTTGYP SDDTENKVQANIVA AKYGTAGLVSPNFNAK  
GSTISLRATTACCTTRYIAHTGSTVNTQVVSSSSTDLREQASWV VHTGLNSDCYSFES  
KDTPGSYIRHSNYQLSLDANDNSKLFSEDA TFCPQTGINGNDHFSIRSWSYPTRYWRHYN  
AILYIASNGGPHDFDATYSFNDDVSFAIT TGLA

>4603\_t gene=4603\_g

MAIGVALVGGGIWAKEEHLPAILASKDLELKAIYSRSIKSAKDVAEEVTEKIDLYSEDTS  
QGYEDILKRDDIQALIVSLPIANQVPFIRSALSAGKHVLSEKPAENVADAVELIKWYHE  
NKTVNKNVTWGVVAENFRYLESFKYARQQIEKLGKIIGFRVRIYANIKEDWKFFQTSWRK  
NPTHQGGFLLDGGVHYTAGLRGLLPGVHFTRLAAFTLLKEHLLPLDTMDAILKTNNG  
IQGTFQISVATTLTGPEWTIACEKGTVTVAKTEVTVRPLDGEEVTETIPDERTGVPPEIRA  
WGEALAAGKQNPEQTPEEALADLELIELMLRSGEQEGQPQCQYQIPGQN

>4617\_t gene=4617\_g

MYVMNAFLATVMATAAVAKPHNLHAGFHKRATSATSTSKIGAAAYNDVSLVSLVSGAS  
WAYNWNLESGSLPPGVDYCPMLWGPKMYSDWSSAVSTALSSGGSSCVLGFNEPDMV  
SQSNLSPAQAAADYQTYITPLAGQATLVTPAVSNGAGTNIGLDWMTNWLAAACNGACKP  
NVMAVHYANADISYFKDFINNATALAAANGMDSVWVTEFQNTGSTDDQVTFLEAIP  
WLNANTAVGRYAYFYAADGYLLTDSMLSTIGQAYVSS

>4618\_t gene=4618\_g

MFTSIRQVWLRITSARIHARKKVAEQTANAALTALRDSNWQDLRQQFFPLLRYFITEKLL  
IKAWKLVERNFGPLEHIGSPTCSVGWFTLTATVPVHFKKTRLNAVLSMTLSGHLFGIVM  
APVSWNPPPYADINSMRTINTSFGNWTSKTGGTLTLPAPTGGDSKYPCILLGGSGPTDR  
DSTVGALKPLKDIALGLAKNNIAVCRIDKIGFIYRCWYRVFGFNKQKYTLTQEYGYALD  
AINRLKHHPAIQAERIFILGHSLGGLMAAHLAATNDLVAGCILMATPTESIYRCLIRQVRY  
LASIGEDPNLGGVPSLEDFEKQADLADSPESLSTPATQLPFGLSPGYWLECRANFPVQ  
IMKDIQKPVLLIQGGRDYQVTVDNYNELQASLRNKANAKFHLYETLNHCFVTGKGP  
AEYTDPGNVEYEVVQDISQWVNGGGMTIPI

>4665\_t gene=4665\_g

MPAPGYKAIEDYGIIGDMHTAALVSKEGSMDFLCWPVFDSPSVFCRLLDKDKGGHFSIH  
ANVPHDGMPLSKQRYLPYTNILETRWIHEQGVLSLTDFFPVSNHKSPQSDRHLSGYCAC  
TEPGGNRWKTGAKHSGIIRRVCSRGTMGVKMELFPAFNYAQDGHTIRCNLQPEEAGK  
HAQTVYFESPQERLQLDVWVDNKREGECPPKAVYRLENRPGHLGQGLVVDTEIQEGQS  
MIFVLHSPEKALPGPTQLASYLSRLESETQFWDWSHKCTFRGHYRETVERSLLILKLLT  
YKPTGAVIAAPTFSLPENIGGTRNWDYRYSWVRDTSFTLYAFLKNGYDEEAEAYITFIFD  
RVFPPLTQKEYTKESHPRPLPIMFTIRGDSEIPEFELNHMDGYRGSKPVRIGNAAAFHTQL  
DIYGELMDSIYMYNNHAKPIQYDQWLGIRRMINYVIQVRDEPDMSIWEVRGKQPFLYS  
KMLLWVALDRGVRLADKHSTLPCPKQWIRVRDDLYDEIMEKGFNKEKGFQCSYE  
NTEVVDAALMIAPLVLFVEPNDRRFLSTLVKVPPEKSGLTASMVFRYDHEKAQDGV  
GGREGAFIMITFWAIESMFRASKYTDLPNGDDIRRKAIASFDNVLSFANHLGIFSEEVAIS  
GEAMGNVPQAFSHLSCISAAMNLPDIRR

>4679\_t gene=4679\_g

MRLSILFRDALNIQSSLSLIIARDGLTARRAFVTRFSRPLFVRRTFASIAPPLVEDVVEV  
PVGAGSITLTVLRPLTDNARANPKVVLYLPRGPIFQDESVVGVGYQRTLDYFALDDDH  
HGTTFSSSLSHGLSTPQELIAAITEANVVTVNYRLGYTNAEARISESGNSRTRPFYRYPTP  
VHDTLAGFDWVLETLRPEQLFVFGSNIGGLATMLSLTESQHIHAVAHAHEPVCDWTGLD  
DYCTIDSDMFTGSGSTIETQSELVPEGEESQSSRPVQTKQPPKHKRKKPAPFDLVPLLN  
TRKHLFETPSKYFDSFASPMLFLRSAGKDVPKIMPEYLTGPEYPPVVKTPVTEELIDLW  
DIQMHIEDGSKVTELKTTEDAPPVEERSSRRRKALSRWPPYGLDAGNDGRSRFAKPTRL  
QITLPWVRFYARLGFSEESSDAAATSIDDSNTPKAKANSRKSLESSALATQAKDMVSV

MRRACFWGEEAGNGEKRVTLRNVTATATSDPRQLTDPNYLETVHESANWFKEVMSNS  
R

>4681\_t gene=4681\_g

MGGGNNWPPSHLPPSPPPSSPNQTLHSGNPIFPGWYADPDAHIFSSQYWIFPSLSLSYS  
QQTYFDCFSSPDLVHWTKHPRILDFADVSWSTNRAAWAPTVAHKNGNYFMYFSAGDG  
AGIGVAKSKTGRPEGPYEDVLGKPLVADVLFGGQPIDPAVVDNGRAYLLWGGWSHG  
LGAELSEDMVSKSEPVETPPNYVEAPYVIKRGVYYYYMYSVGGWGDNSYGYEYVTS  
TTSPLGPFTKTSKHILSPDPVAQGTGSNGVINVPGTDEWYIVYHRRPLGDYDANHRYV  
CIDRMEFDDEGGIKPVKITKEGVKANPL

>4710\_t gene=4710\_g

MTINFSWIVTALLAPLVATVFWTLSSTSSGFNSFPTLHNKRICLLIAHPDDEAMFFAPT  
VLAATKPELGNHVKILCLSTGNADGLDIRRELQSAVHLGLRDESDVFVIDDPSRFPDSM  
TTTWTSTKDVSSLLASAFAPELASGRAGREDAVPAKATIDVILTFDEYGVSNHPNHRSLYHG  
AVAFLKALMDGKSGYSSPVTLTYLTTTINIVRKYSGILDSFLTMVVGAFNTLGDSTLAG  
KKGAAKDNGCASRLLYISSFQDWVQARTAMTDGHKSQMLWFRWGWITIGRYMFVND  
LKREKI

>4725\_t gene=4725\_g

MRFSLSAATAAWILSLQVAAQTYTDCNPREQTGCPADPALGGSASFDFTKGAQKNWT  
TSGTIVTYSSSTGAGFTVASAGDAPLITSDFYIMWGHLEVVMQSAPGTGIVSSIVMQSDL  
DEIDLEFLGGEDTSVQTNFYFGHGDTSYENREQTIAMSNNQNSFHKYTIDWTANMIVWQI  
DGTTVRSMAPADADSGQYPQTPMMIKIGIWAGGDPSNPSGTISWAGGTTDYSGKPFM  
YCKSVSVIDYSTGSEYVYTSSEGTSDSISAVGGSVDGNMAATASVATDASAATITSSGGE  
APLPWSGTHRETSSTWTPDVWPVATATASLTNSNPSSGHTTSGGDRSAPLTVQTYFP  
MYFIFASLAFGLLPLWR

>4773\_t gene=4773\_g

MVILLPILFLASAGWAVAATTSGRDRSSLNAGWKFSRFTSNPDSLSYSTLSPWMLPLAND  
FIVNGAKHQVPSGTPPGSNVQYVQASFNDAWQNIPLDWDIAIAGPFNAPGISGGMGR  
LPTNGVGVYRRNLVATADDVDGKTSIFLDVDGAMSAAVWLNGLLGGWPYGYASWR  
LELTPYLQAGNNTLAVRLDNAVDNSRWYPGAGIYRNLWLKMDKTHVAQWGTYYITP  
SVSSSSATVNLIVQVENNNVTRQVDVTTNVYIDQSTGTAGTAVVASFQTTTISVNAG  
ATQSVNGSVTITNPLWGPAPAQTPNLVAVTTLSASGTVIDTYETKFGIRSLTYDPNTGL  
LVNGQHVVYVQGTGNHHDQGSIGTAINTRALQRQLQTLQEMGSNALRTSHNPPAPELDDL  
ADSMGFMVLDEAFDCWSQGKTSNDYHLIYSDWHEPDLRAFVRRDRNHPSVIAWSIGNE  
IPEQSTSQGGSEGQELHDIVKSEDPTRQSTSAMNSAGPTAPLANVIDIEGLNYQGEYGAY  
GSFHSTFPNKMIWGTETASCISSRGTYLFPVTSSNGQTYSSSGSDSSNMWISAYELENPG  
WGGSPDQVFAAQDSFPVAGEFTWTGFDYIGEPTPYGGNPGARSSYFGIVDLAGFKKDR  
FYIYQARWRPDFAMVHILPHWTWPERVGQTPVHVVFSSADQVELFVNGVSAGRQNRPG  
KSIYRFRWDNVTYSPGDLWAVAYKNGNQWAVDTRKTAGNAAALNITLDRASIASDGV  
DLAYVSVAVVDSAGTVVPRANLVTFSVSGPGTLVSTDNGDPTDTSFSPASRNAFSGL  
VLAIVKANAGATGQITVSATANGITGGQVVITASGSTTTTSTSASASTTTTSTTSSSTTTST  
TSTTTTTPSTGNCSAKWGQCAGQGWNPTCCVSGSACTYQNPYYSQCL

>4775\_t gene=4775\_g

MTIISKFGIGVLIADVSKTTAQQTWVGQCGGIGWNGPLTCVSGSYCAPENPYYSQCLPGS  
GPSTTTAITTTTITTTTTSSSITTSVSTTATATGKVKFAGVNIAGDFGMVTSQTDLTQV

VDESVDGVTQIRHFVND DTFNIFRLPAGWQYLVN NNLGGQLDATNFGEYDKLVQGCLS  
AGAHCIVDIHNYARWNGAIIGGGPSDAQFVDLWTQLATKYKAQSNIIFGVMNEPHDLN  
ITTWAATVQKVVT AIRNAGATSQLILLPGTDYTSANFIENGSGAALVGVVNP DGSTHN  
LIFDVHKYLDSDNSGTHAECVTNNIDAFTSLATWLR SVGRQALLSETGGGNVQSCATYM  
CQQLDFLNANS DVYLGWTSWSAGGFQPSWNYVLTEVPNGSTDQYLVQQCFVPKWKS

>4790\_t gene=4790\_g

MPTTGSWRSRSLILSLLLAPVTQAITIDTSNRQSVIDAASEAAYGMMTWYAGNETGQIPG  
KLVDTWWE GGMFMALIQYWHFTGDTTYNDEVTVGMEFQAGNGDYMP SNYSNYIVR  
LTFGLFHSRTL AFLGILGFLAVDQGNDDQMFWGLAAMTAAELGYPEASSGYSWLSLA  
QGVFNTQVARWDTTACGGGMRWQIWNWEAGYTMKNSISNGGLFQLAARLARYTYNE  
TYAEWAEKIWNW TIASPLIDTATWEVGD SVMSDNCTTV DSTRWSYNYGYL SGAAFM  
YNYTNGSSEWLTAVNGLLTATWDTFASDTYGNILTEFECETTEICNRNEVLFKGLTAGW  
MAFTALIVPSTYSTIVPKLQTSSAAAAASCSGDNNNTCGVKWYTKSWDQGIGLEEQMSA  
LNIFWSNLIMTTNASSYAPVTSRTGGNSTSDPTAGTTDSTDKTSTLKAITTADKAGAGILT  
ALFAVAIIGVVYWTVAGSE

>4796\_t gene=4796\_g

MYRFFALTYLLATHIVSCTASPPSKAIEKRAVCTPSSYDSTSEDDTPAIAAAIASCGKGGTI  
VIPSGTYSIRSLEFTGCSGCELQLEGTLKVSDDYEYWSVHKAILLISDITGATITSKTGAG  
VIDGNGQDAYDAFAANSSLSRPTLMYITGSSDITMSGFNVKNPPNVFFSNTGSSSNVEYA  
SLTMTASSKSTNAPKNTDGFVDGTSTYTTIRDVYVSNQDDCIAFKPGANYATVDTLTCA  
GTNHGVSIGSLGESGDSTVKNIYVTNLSMSGCSKAVGIKLYASGPDYGTATVSNVTYQG  
VAVDNCDYGLQIQSCYNGNTTYCAAYPSTASLTDIHFNDFSGTTS GKYGSVVANLDCSA  
DMTCDVYVEDFTVKPPSGTAEFLCANFDVSPGVTCTSGASG

>4801\_t gene=4801\_g

MVYTAQFLAMAAAMLPSAVLAQNNQTYANYSSQSQPDLYPQTLATLNLSPDCVNGPL  
KDNIVCDTSANYVDRAEGLIALFTLEELINNTQNSGPGVPRGLPPYQVWSEGLHGLDR  
ANFAKSGDEWTWATSFMPILSMAALNRTLINQIAGIIGTQARAFNNVGRYGLDAYAPNI  
NGFRSPLWGRGQETPGEDANFLSSSYAYEYITGLQGGVDPEHLKIAATAKH FAGYDLEN  
WGGNSRLGFDASITQQDLAEYYTPQFLAASRYAKAR SFMCSYNSVNGVPSCSSSFLLOT  
LLRENWDFPEYGYVSSDCDAVYNVFNPHGYASNQSAAAADSLRAGTDIDCGQTY PWH  
LNQSFIEGSVTRGEIERSIIRLYSNLVKLG YFDGDKSEYRQLGWKDVTTDAWNISYEAA  
VEGIVLLKNDGVLPLGKNVK SIALIGPWANATEQLQGNYYGKAPYLITPLQGAGDAGYK  
VNYALGTNITGNTTEGFADAISAAKSDIVVYLG GIDNTIEAEGTDRLNVTWPGNQLDLI  
QQLGQTGKPLVVLQMG GQVDSSSIKSNSKVNALVWGGYPGQSGGKAIFDILSGKRAP  
AGRLVTTQYPAEYATQFPATDMNLRPDGASNPGQTYK WYTGTPVYDFGYGLFYTTFKE  
TAKKLGSSSFDISEIISPRSPSYEYSELVPFVNVTATIKNTGKTASPYTAMLFANTTNAGP  
APYPNKWLVGYDRLASIEPGKSADLVIPVPIGAIARVDENGRIVYPGDYQLALNVDRSV  
VWDIKLTGDAVTIENWPLDEQEIKPDSE

>4810\_t gene=4810\_g

MDGKKTAKFGWLPTTRRSKLLWIIVGSIILAVALGVGLGVGLKGHHNPSASRRNPAAF  
CSNAAGSYKVDNITAPSKFNAGSNTNINIVPSWSTNANITAWNLTVDDSESGYKQVVTG  
FGATVTDATVSSLSLQSNETQKAILQQLVTGDGANFTLIRHTIGSSDLSSEAYTYDDNNG  
ATSDSLSNFALGDQGTAMAQLLAQMKQLNGNITILGSPWSPPGWMKLNGLMGNTTD  
NNLDDGYDTSKGLGSTGHTRAFAYFVKYIQAYADLGVNVDAITIQNEPLNSQAGYPT

MYVEADESGKLINGYVGPALQKANLSTTVWALDDNTDDADYASTVIGYAGQYVDAVA  
WHCYASTLNWTVLTEFHNQYPNISQYMTECWTPTNLSWTHVVNFTMGPLQNWANGVT  
AWTLGTNDNAGPHLASGGCSTCDGIVSVNNTVSADSTSSNATDYTFNLSYYIMSQFSKFI  
PPGARILQTDGSAVDDNGDGIQAIASLNPDGSRVVIENFANDVNVTVYLESGVGWVG  
NVPNSSVTTWVLP

>4847\_t gene=4847\_g

MVSQPGDYAAVRKDIAAQLEKPGYDDGSAGPVFLRLAWHSAGTYDAETDTGGSNGAG  
MRYEAEGGDPANAGLQIARAFLEPVKERNPWITYADLWTLAGVVALKEMGGPDVKWL  
PGRTDYVDDSKLPPRGRLPDAAQGSDHLRHIFYRMGFNDQEIVALAGAHNLGRGHIDRS  
GFEGPWVHNPTFRSNQFFKLLLNLWKPRTLSTNGVKQFSYSDPDASEDEKEEPLMMLPT  
DMALISDAEFLPWVKKYAEDRDLFSQHFAADVFAKLELGIKRDEKGNVTNTDNLGGYI  
SAPKKSSAPTGPLKSEEQRREIVAKARL

>4849\_t gene=4849\_g

MRVRLDHEASSRLPLRPASTTQRSNTLDKCLRVLKASLLIPGRGEPINRNGALVIDGQKIA  
WVGEQSAIPNKYQDVEFDEVPVLMPLGLWDCHTHFSGMDVDDDNIQNLFGSAAALQGAR  
AAKELETTLLAGFTTIREVGGIAGEIWPAAIKKGTLVGPNVYSSIGVLGITGGHSDIHNPL  
DVVTARRSTGPFVCDGVSDCVKSVRLMVRRGATLIKICATGGVGSLLDDPEDAQFSPE  
EIKAMVDEAARTKRIVAAHCHGKEGILNALNNGVRTIEHGSYLDEEVAALMKEKNAIFV  
STRLIVEEGLKNPSIFPPTGYQKLLKISEAHRKAYALAIKSGVKVVLGTDWTAGENGKEL  
AYAVEAGMSPLEAIEASTARCPETLGSHPAPLSGQLKAGYDADVIAVASNPLDDIRILGE  
PEKITHVWKGKLYKGS

>4850\_t gene=4850\_g

MASHNSKRQPWKEAVVYQIYAASFKDTNRDVGWDIPGIISKIDYKSVGADTIWLSPIYA  
SPQHDMGYDVSDYRSIHAPYGTLEDVDRLIAELRDRGMKLWMDLVVNHTSDEHAWFK  
ESRRSIDSPKRDWYFWRDSKYDEKGLKPPNNWKGFMFGGSAWTFDEATGQYYLSLFLP  
SQPDLNWTNSELRQAVQDDIRFWLDRGVDGFRIDSMNLMSKHPDLPDGETTCPDEEYQ  
SGDKWFASGPRMHEYLQELRTKIFDTYNAVTVGELGFTKDEESVSKYVARSRHEINMLF  
TGDIIDMDFGPNKYTSGGGFHPRQLRMLTDKWQTAMPRFDGWNTLYLDNHDSGRSV  
SRYGSDDPRYRDYAAKMLSTYLTTLSGTLFLLAGQEIGMANLPKDMGVEQYIDVEGRN  
YYNKILDSRGGDHSKMADVMEYLQLKARDHGRLPMQWSAKPNAGFTVQEARPWMTV  
NPDHTLGWNVEAQQDDPNSVLSFWRESLNRKNFADVFTYGSFEMLLESATHERVIAY  
KRKDYGSDKEALVLLNFSEQNSTITIPWLTGWTTLRGNYSTPPSPSEVIMRPYEAIVYCL  
GFPL

>4851\_t gene=4851\_g

MSLTSLTSTQEQLEVVHLRNTLFIHKNCNDEHKIPVPSTWRPKFHVTAPSGWLNPCGL  
GYDPSTKKYHLAFQWNPKGNDWGNVSWG NATSSDMVSWNRS AEPMLSPTTEYDHSG  
VFTGLRATVDVGSSGALTCIYTSVSHLPIHYTLPPYVRCETLSLAISHDSGKSWRRLQC  
NPILPGPPQDFEVTGWRDPFVGPWRRSESDQQLYGFISGGIVGQTPTIFAYTVNLKDLRE  
WMFIGCLVDVGLNFRPSRWSGDFGVNWEVANVFDLVSQEEVVSRTFMVVGTEGCLL  
VKDDDRVMARTARTQRQQLWMALKAKPAIVCEDNNDSSSTNTQALATYSFAGIFDHG  
CYAAANSFYDPVTAQHIVYGWITEEDLPDNLRHAQGWGLISLPRMVHLQVLHNIVRAR  
NSALQCITSMETEIDSRGTYTVRTLGI RPDDR LRKLRDKARRAHTMQNLSLRSSHSSQSII  
PLRTSKWEVEAEFAVHKQCTRVGIQISHSADLKSQTVLSWDPRTEFTIERPHPTYPGINH  
GIESAPHTLFTFRNDQGSEVEEPLRIHAIFDTSVLEVFVNERTAISTRIYLDEDRCFLAFF

AEGESYHETCVSEAHTVLLRAQAWDDLEA

>4855\_t gene=4855\_g

MPLNTACV GASVAPT V LSTWFAHYIDRKTRHQKPTAHISYDEGLNIVRAFLKHA AHHTV  
EDLQAFTAQKIPSPTWVKVQEQVIPNEHLTEAADHVNAQLGERGIKRVGGKTWWQWR  
GPQGD LKCEWIEMKSDYRARKQANAHSAYRLSPQFPFPCGLHDCLAAYLYLLTLQDPT  
EIILAGDSAGGGMVLSMLVILRDQGIPLPAGAILVSPWVDLTHSFPSVARASKFDYIPEHG  
FLQRPSRSWPPPNSDDLAYMYQNTNQKNPGKIGSGVQTDGIGKVNGYDQQTAVQGF TV  
REENTAGANHTYPGLHNGINRVGTADVGT AHADNII VPMADNTIVEIKDQIQMYAPNQ  
MLSHPLVSPVLQPTLGG L P L L I L T G G G E L L R D E Q V Y L A H K A A D P L S Y L P A D I F L D E H D P  
DRILIHKYGPTNVQLQVWDDLCHVAP T L S W T R P A K Y M Y R S I A Q F G A W A L A H A Q H E E I D  
IPDDDASSISSESSSTS D N E E P I A S V G K A G D P L P S F R K H M I R Q R V D R H G I V Y H L D P P Q S L P A  
LQHPRNKIGALNPDIVKKW MGAKKAWDEKFAKEKLAVQRRRIKEFEMGYFRFDGELPP  
ACAMASRRMEKDLAKAKIRKSYGMMMW SLLASKHDKDIVAREARED T I P H I T N K P L D G  
QEGQGD T D I I A Q K T R S G R E E S I S A P D R R K L F P V P V E E R S H S R S R S R I V S D A G Q V S E Y G V  
DQSEQHSTSASTPIVLIPGVD T N T D T Q S T V K T P D N V S T M A V L N A D G V L T T T D A S T V K S D D  
SIILRPSSLS D Q N G G V A P T P S D S A P H T P S I T T D S A T E L G V D G S N A S T M A V R H V P Y I L K E H E E  
EKQKRPSKVDEVSPHAERDAVVSNGAETPKANGQDRDTFPFHVEKERPEMPDRNEFVT  
AEEIQA

>4871\_t gene=4871\_g

MKFSNVSLVW GALASVALGLTAAEWRSQSIYFLLTDRFALTSNSTTASCDVADGLYCG  
GSWQGVINHLDYIQMGFTA I W I T P V T E N F E G D T S D G E A Y H G Y W Q N A Y A T N S H Y G S S  
SDLLKLSKALHARGMYLMVDIVVNNMAYDGAGTSVDYSIFNPFPSesyHsyCLINYST  
YNATNWNDCWEGDTIVSLPDIDTTQTYVKETWGTWVESFVANYSIDGLRIDSAGHIQQD  
FFTAFEDSSGVY C I G E V D Y G D P A V V C P Y Q N Y L S G V L N Y P M Y Y Q L L Y A F E S S S G S I S N L Y N  
MINTVKS CADT S L L G N F I E N H D N P R F A Y Y T S D Y S E A K N V I S F I F L T D G I P I L Y Y G Q E Q H Y  
NGGNIPLNREALWTSDYSTTAQLYTHTKTSNAIRSLAITKDSAYLTYKNTPIYQDSNTIAI  
RKGT T G L Q L V T V L S N L G A S G S S Y T L S L S G S G Y T S G T V V T E L Y T C T N V T V S S S G T I A V P M A  
SGSPRAFLPWSVSGSSLCSGSGSSCTAASTVA V T F E E V V T T T Y G Q E V Y I S G S I S Q L G D W S  
TSSAVLLSASQYTSSDPVWVTIDLPAGESFQYKFII V N T S G S V T W E S D P N R S Y T V P T G C Q  
GLTATVDDTWR

>4876\_t gene=4876\_g

MYTLRNIPRAIALSAFAFSTLSSADICSTVQTETNAVQEPLSVAYESELQDYWSEAC SALR  
PTCIVFPTSAEEVSEIIATLQGTDDL F Q I K S G G H M P N N G F S S I Q G G L L I A T K N L N N G V A Y D  
AETQTAKVGPGLTWSETQNLAGTGR TVVGGRLGGVGVGGYILGGGLSFLSSQYGWA  
ANNVVD FEVVL ANGTITHANNSTNTDLFAALKGGGNNFGIITQYTLQTHPISDQVWGGV  
LTF SYDKSPQLLQAIRDFTEYYPDDKAAI IPTCEHTSLFTEWFVVFYDGP T P P D G I F N N F T  
DIGADLN TAQTWDSY Y D L L Q D N D N Y D L H G Q R Y A I A T E T T P L P N A T V G L E V M T T F F E T F  
YNITSEVLLDTGVIGTIAFQPMPTITSKAIALGGD L L S F P D T N D Y I I F E L D I S H S L A S D D D T  
TEAAIQQLYTALDNNVQNLI AKGLLPDVYRPLFMNDAHGTQDYWGRISTANKARTVRE  
KYDPELFWQKRTSGGFRLG

>4879\_t gene=4879\_g

MNMLVSTLAVSASLVGLAKATVQGF DISSYQPSVDFSAAYDSGARFV I I K A T E G T D Y I D S  
TFSSHYTGATNAGFIRGGYHFAHPDSSSGATQAKYFIAHGGGWSGDGITLPGMLDIEYNP  
SGATCYGLSASAMVSWISDFVNTYHASEGVYPLIYTTNDWWTTCTGDSTAFSSTCPLVL

ARYGSSPGTTPGNWGYQTFWQNADSYTYGGDSDFNGGLSQLKAIASG

>4999\_t gene=4999\_g

MEQITVIGALLQESFDLIVGGGTAGLVLAARLSEQDQVRVGVIEAGSSKIGDPKVDLPSG  
VGMMIKNPEYDWFQSVQKNAKDRAFHLPRGKMLGGSSAINFMAYGRPCAEDIDDW  
SSKLGISGWSWEDLLPYFKRSESLTSDLKSNLEDSPLNSNYHGVDGSIITSLAPWQLPFEK  
TLLPTLDEVSGIARPADPNNGCHQGFFRSIFTIDRATKPTRSYAGSGYLAPNIGRPNLKV  
ANTVAKRLILQQSTDGFYQIGGVEVQHEGELYTLKAKKEILSAGTLQSPQLELSGIGDP  
SVLQEANIPCLVPNSNVGNLQEHTMSAVVYELAPGLISLDSLKDPKVFQEQQRLYNEH  
NSGALSGIINLFGYIPFRSQVSSEIFAETLQRITEASSRSNPGPRPQITEFORKQQAIVARM  
QNPKAADIQVVGSPAFFNIAKGYNHVVKLMTGPPPDHNACYSLVLSNMYPLSRGVS  
SANVSDAPLIDPGFLSHPADVNVLAAGIQFAERVFKSNRLKDSVIKRVDPPLSVNLDNVE  
EARAFVRERIVSYHHALGTCAMGQVVD SRLRVKGVHGLRVVDASVMPMQLSTAI  
VATVYAVA EKAADMIKEDYGLLTKSTFK

>5023\_t gene=5023\_g

MPGALLPPRSQRHHAQMERTSAAEPDLYLISSEDTIYEQDLLRDPGSIKPWLSYIEYKRQ  
NGTLYEQSFIMERACKQLPRSYKLWKMYLEFRINHLRGRNPAIHRAEYQKVNTL  
FERALVLLNKMPRIWEMFLSFLKQPLVTYTRHSFDRALRALPITQHSRIWKLYKAFANSV  
SGLTAVQIWRRYMQVRPENAEYIELLVELGYTSAIKKYMEILDNSSFQSKKGSQFQ  
LWSEMVPELLVNKAKHIDTTGNGGIDVDSIIRSGISRFSDQRGRLWVGLATY  
WITKGNFEKARDVFEEGITSVMTVRDFTMIFDSYVEFEESIIGTMSQAESRSK  
KGVDEDEDADFDLRLMLRFEQLMDRRPFLVNDVLLRQNPNNVVEWEKRV  
ALWGNNVSEVVSTYTAIAAINPKKAH GKFH  
ELWVNYAKFYENGGNIDTARIIFDKAVKVPFKTVAELAETWCEWAEMELRSE  
NF DKAVAIMAKATQAPKRSTVDYFDETLSPQQRVHKS  
WKLWSFYVDLVESVSTLDETRKIYDRIFELRIATPQTVVNYANLLEENKYFEESYK  
VYERGLDLFSYPVAFELWNLYLTKAVDRKVSVERLRDLFEQALDGCPPKFAK  
VLVLYMYGNLEEERGLARHAMRIYERATRAVSD EDRLEMFNFYITKSASNF  
GLTSTRPIYERIAAALPDHEAKDMCLKFAEMERRLGEIDRARAIYGHASQFC  
DPRTNAGFWQKWEAFEVQHGNEDTFKEMLRKRSVQAQYNTDVNFIASQAIARS  
QQQRAQNGEADKDEEEDQERADAMAALERQARAPVGFVAASSGPEGGNRPSA  
AATTAPPANVNPDAIDLADMED

>5030\_t gene=5030\_g

MAITNTIVSILTKPQHSLWIAPLFLADAVLSALIIKKVPYTEIDWTTYMQQIALYQAGER  
DYTAIKGDTGPLVYPAGHVYIYSFLYELTNKGQDIALGQYIFAGIYIATLIVVLSCYIKAG  
APPYLLPLLVL SKRLHSIYMLRFLNDGIATLAMWLAIFFFQRRQLTIATTIWSLGVGK  
M SLLLAPAVAIHIALSGGIWA AVPLALNAILTQVLLGIPFLQENAIGYVSRAFELTRQFLYE  
WTVNWRFMDEEVFDSPVFAINLLVLHVLVIAFLATR WIRPSGEEIDTFTQKFIGERSRK  
VSLSSKYVTTTILSSMAIGMLCARSLHYQFYAYLAWITPFLWQAKLHPVLIYSVWAVQ  
EWGWNVFPSTTASSAAVVVCLGFQVVMLLASDNFSQGPAD EAKKATAERKTK

>5047\_t gene=5047\_g

MNIVRRIVKRLPSAPALASLEDVSREKGSRLSPLAFLRRRIRLRGNSSVSIPLGVVLIFPCVI  
IVLIVTIFARHPSSSVLVPAGSPSIRRRISEEHDKVFATGCLDIDEKAIAAAPRANA  
AFVV LARNKELEGVIQSVKSIERHFNRWWHYPYVFLNDGDFDNEFKDTIQNYTSAPVEFG  
KID DSMWGYPDWVDHEVAKEGIRKQGDAAIMYGGMESYHHMCRFYSGFFYKHPLLLKYE  
WYWRLEPEIKYFCDITYDPFLKMAEANKTYGFTIAVKELRETVPNIFRYASAYKRVNGL  
ESKGLWEMFVEKPPQDEEKDDKKKEPIPEELDDIKPPEIDKETMEGEKYNMCHFW  
SNFEI

ARLDFFRSKEYEDFFEMMDRSGGFWMERWGDAPHSIAAGALLAPRDIHYFRDFGYRH  
TTIQHCPANAPARQLPRIPFLEKTTEDEKKRIEEDDYWATPDPVKENGVGCRRCRCDTIV  
DVEGKQGSCLAEWVDVAGGWASP

>5057\_t gene=5057\_g

MGKKRVLVGYGVDIDAVAGWLGSYGGEDSVSDISRGLWAGHIGTTRLLRFLDKYNIKA  
SWFIPGHSLETFPEECAQVRDAGHEIGLHGYSHENPASMTKEQQKDILDKTYKMIRDFCG  
KPPRGVVAPWWESSAEMVELLLAYGIEYDHSMSHEDCQMYWLRTGDSWTKINYNEKA  
ETWMKPLVRGETTGLVEIPGSWYIDDLPPMMFIKNSANSHGWVNPRIEDIWKDHFDFY  
YREYDEFVFPMTIHPDVSGRPHVLLMHERIEYINKHEGVEWVTFEQMCDEFKKNQPP  
EGAKLPVVNPII

>5082\_t gene=5082\_g

MARALTLLSLGSLGCAISASNSSFDYDVLQYVDPLIGTANGGDVFPGATLPHGMAKAV  
ADTNSDSSQGGFTLDGANITGFSSLHDSGTGGSPSLGNFPLFPYASCANDSIDGCKYPPK  
ERPVSFDTASVNATPGYFAVTLDSGIKVDMTTAQHTSLFRFQFPKGGSSASPLILLDLTDL  
SDSRQDNATVDVDNSTGRMTGSGRFLPSFGSGTYVAYFCADFQSASGIRDNGIFVNSRA  
TADAKSLKISRSINGYPLPGGAWTRFNAGTESVLARVGLSFISEDQACSNAEKEIPDFDFD  
STHSAAVSAWTDKLSPIRVSQRQVNETLLTNFYSGVYRTMTQPQDYTGENPLWESSEPY  
FDSFYCIWDLFRSQMPFLTLDIPETVTKIVRSLVDTQQHLGWLPCRMSLCKGYTQGGG  
NADNVIADAYIKGLTDGIDWDAAYA AVQKDAEEEPYDWSNEGRGGLQSWKSLNYIPV  
QDLDYVGFMTTRSISRLEYAYNDFAIHQIARGMNKTSDAEKYEKTSAYWQNLFKAD  
QTSYFNGTNTGFTGFFQPKYLNQTWGFQDPLMCSNIDNSGSICSLQNNAETFESSIWEY  
QFFVPHDMATLITLLGGPSSFVKRLDYMHDNQITYIGNEP AFLTVFYHYAGRPGKSASR  
AHYYIPEYFGTSPGGLPGNDDSGTMGAFVAMSMGLFPNPAQNVYFIIPPFDSVQYTSP  
LTNKTSTIKTINFDTKYKNIYIQSATLNGQPYTKNWDHSFFTDGMELVLTGRNESSWG  
THAADLPPSLSTQGSSSLEQRSGLVHPYMQ

>5091\_t gene=5091\_g

MALVFDKILFGDSITQLAYNQEFGFCFGPAMQDVYNRKLDVIQRGFGGYTSSHAAIMID  
RLIEQESAGASKIKLLVFFGTNDSIVPESASNNSVPVEKFQDNLRKIVSAADKVS AKVVL  
IGPGPFNHQQFDDALGHQFEVDRTTHRAREYCNATVDVGKELGIPTVPMWDLVMEEVG  
WKEGDPIHGLPELPAVNPLNDYLS DGLHFS GPAYKVLFTNVLKTIKASYPELDPENIPEH  
LPTWDQLTTS HDALRKAIE

>5092\_t gene=5092\_g

MADFDIEETLSRLSLSEKVDLLAGIDMWHTKALPEYKIPSLRFS DGPNGIRGTFKFFNGVPS  
ACFPCGTALGATFNTVLL EAGRLMAREAIKKNVHVALGPTVNIQRSPLGGRGFESLSED  
PLVSGLGAAALIRGLQSEG VQATIKHFVCNDQEHKRNNQSIVRERALREIYAMPFQIAV  
RDSQPAAFMTGYNGVNGAFCS EDPKLLDELLRKEWGW DGLVMSDWYGTYSTTPAVV  
AGLDLEMPGPPLFRGPPLRVNAASGKIPEHVLNERARKVLELVKCTSTTHFQENGPEAT  
VDPETAALLRKIGNESIVLLKNDGNILPLKRNLS TLVLGPNAKMATICGGGSAALTSYY  
SVNPLRAINQKLSSPATY TIGAYTHKLLPILGPQVYSPNGIPGMRWRV LNDPPGTADRRW  
IEELFFQNT EILLMDY YNDRVASLWYADLEGSFVAEEDGLYELGLVVRGTAKLFDV GEL  
VVDNATKQFP GDTFFGKSTREERGRVTVRK GQTYNIKVEFASAPSFTLKV DGN TSGHGA  
IRIGGCPVIDDQAEIKKAVALAKEHDQV IICAGLNADWETEGVDRESMILPGCLNQLISEV  
AAANPRCVVSMQTGTPEEMPWLDQVPAVIQAWYGGNETGNSIADV LFGDYNPSGKLSL  
SFPKRLQDVPSFLNFGDESGCVIY GEGIYVGYRFYEIAQRKVNFPFGHGLSYTSFAFSNPT



VSGHDGRLSASMKVRNVGSRGAEVVQMYVHPPKETRIRRPikelKGYAKIELDPDEEK  
EVTIQVQEKYAVSYFDEEQKKWFAQAGTYEILTDCSAAPEGKTVRGSYTVKESYWWS  
GI

>5094\_t gene=5094\_g

MSVQEIPKLRWGIVGCGWISSWFVADLCLTRRNATTLHVIQAVGSSSHEKAKSFVYEH  
PSQSPTLYPSYHDVYNDPDVDIVYIGTPHAVHYQNALDAIEAGKHVLCEKPITLNATLAR  
TMMDAAKKKGVFLMEAVWTRFFPIVNKLQSLLEEKLIGEIAHVMADFSLYMPIAQND  
PNARTASLALGAGALLDIGVYSLTWASLVLDTSNPNRNTSIEPGLTASMIFHNETDPDKRID  
EEVAVILKYPDLKAQAICTASLRSKTGQEFahiYGSEGSIAIGGGGASAPSFLVIRLNGQE  
EQRLDFSVEGRGFHFEADAVAQDIREGRLESSIHSHTLTIMNRMDTARAICKLRYPQD  
NLELQG

>5095\_t gene=5095\_g

MDSSQKVLNVGLIGCGEVAQVIHIPTLLHMSKWFRIVYLCDILTGALAHCKVMVTNHAT  
KTPDPKALCASSDQDVVHANSDEYHAPHAILALQNNKHVLVEKPLALTKRDILAIHAAE  
RTSRGRVMVGYMRRYAAPLEDALREIGGMDKIIYARVRDIIGPNSLFISQSGTFPERFMD  
FSATDTIDKETRAREMTSQALEIESDHIPVNKDTVSMWRILCGLGSHDLMLMREVLGMPE  
TVIGASLGLPFWNVLFKYSGFSLSYESGLDNNARFDAHIEVYSNTKSVRLQYDTPYVKG  
LPVTMHITENENGLKTKIISYEDAYVLEMKELYQVVVEGKPKTTAEDALQDLELF  
SMIMRAGYSS

>5135\_t gene=5135\_g

MRIHVLAFNLNLPsAVLGYVNEGTTCEIYPEALTHNGKPVDDAPSIHQAFDLCGINGTV  
IFTNHTFNVNSVLNTTNLINCdVSLRGELRFSTNIPYWKSHVFSVIYQNSTAWLFGGTN  
VTLRGEggWINGNGQTWYTENKNEANQPGRPISITFFNSTNLLADGLTILQPQFWATFV  
WQSTNVSLTNFFVNATSDDQWGLNTDGYDSWRSSNLLVENATITNGDDCIAAKGNTT  
NLLVRNVTCYGSTGMTIGSIGQYPAWPDYVENITFDSVRCVNCTEGAYVKTWQGTPI  
DLNGDSGGGGGLVKNVTFNFEMINHLPIQISQCIYSESSGACNTSKLQIEDVSVWNIT  
GTSTYNIVASMYCSDLVPCPGIKFDNVTfQSVNQLGLPMWNTTLQDEVYQCANIINQN  
SSGIPCNRVAPDNFGQGVSSNVQ

>5149\_t gene=5149\_g

MIQVRVTNSKFCANAVTDQIGSIKSAKAVATEMMSYYTGYRPGDNPGNLPDPYFVWE  
AGAMFGALVDYWAYTGDSTWNNMTTQALLWQASPGANFMPKNQTMTEGNDDQAFW  
GMAAMSAAERNFPNPPADQPQWLALAQAVFNSQAVRWDPTTCGGGLRWQIFTWNKG  
YGYKNTISNGGFFNIASRLAKYTGnkTYADWADKTWQWTADVGYLTPEYRFWDGAD  
DATDCKNYNLIEWTYNSGVYLLGAANMYNFTNGSDIWRDRTLQILNATSVFFSTEPENV  
MYERACEPVGTCQVDQKSFKAYFARWMAATTQMAPFTYDIIMPRLRASAIAAAKCTCG  
GPNGTSCGLKWTQKWDGSRGLGEQMSALEVLQSNLIHEVAPPVTDANGGTSIGNPAA  
GSGPNAGSVSQGRLGDMRTMEISVADRAGAGVLTTFVFLAGLVGCTSWLIYER

>5173\_t gene=5173\_g

MKFLFLAAVAVVVRAQEVYITTTGYTARPQCTEPPATPSFRFQFSYASLNDTVRYAIS  
VPSTTTHTYGPAYSDAVARLSTRLSTTKWGSWLPSQTVISATDTADKYQAAWSSQW  
LHASLANyTNVGLYTTTVSPTPLPSELVLPDRDYFGPTDCYNFPEGFTFGVAGSAAQIEG  
AIGLEGRAPSILEKLLPDTEPQDYVTNENYYLYKQDIQRLASIGVKYYSFSISWSRILPFTV  
PGSPINEQGLKHYNLIDYVLEVGMVPIVTMLHFDTPLYFVNASAGYVVPDIDYQNGGY  
WNSDFVDSFVNYGKILFTHFADRVPFVWTINEPLLYAFNFTGLDNVVAHAELYHFYHD

TLNGTGKVGKLKLNDFGVPKNPENQTEIDAANRFNDMQLGVFAYPICLGQQYPKSILDT  
LPGAKPLSKKELKYISHTTDFIGIDAYTATVISVPAEGIESCSKQNMNTANSLYPYCVTQET  
VNAYGWDIGYRSQSYVYITPTYLRAFLSYLWNTYKTPLILSEFGFPVYAESTRDLDVQLY  
DSPRSQYYLSFMSEVLKSIWEDGVDVIGAIAWSFMDNWEFGDYAQQFGMQVVRRTTQE  
RWFKKSFFDIVDFVGARNGLY

>5178\_t gene=5178\_g

MAQFRLPPACIPGKTFVYKTIGDLKLEVDLIPENLPSKDAATAVLFIHGGSWVFGNRT  
EYCRPLFKEFLARNYVVASADYRLLPESDFVSGQLEDIRDLEKWMREGLSDHLSQEGFR  
CTIGDVIVAGASAGALLALLTPKLWNKNPTAILSISGPTDLHQIPPSKMDHLNSITVPELTS  
KLISSVIDVESPIASAPIGSPKSLEEFFGDPRRQIGMQVFHRGLVAEFLLRGLIRCLDDGT  
VEWRFPDNGAVPESEIDAMSPLHLAKQIAYPPTYQILGSIDNLFVSHAHKLGECLNSRGI  
AHKEHIVNGQPHGFDFNFTDMRDDVHLSVICPAVDWIAGIVDGLVKI

>5204\_t gene=5204\_g

MPSEPKNRLIVVSNRPLSIKRGEDGSYLTSMSSGGLVTSLSGLTKTTEFRWFGWPGMSP  
KEPEEQEEVRRSLASHNAIPVFLDEELAQKHYNQILWPILHYQSGVTYDDDESWEA  
YKKVNEIFADYIADAAQEEDLIWVHDYHMLLPKLLRERMAKKRQACIGFSLHTPFPP  
SESLKVLPAKDILEGMLSSTLIGFHTDDYRKNFTESCEYLLNARSQDGAIYKDRRVKT  
GRFTVGIDPEKFNELKQDEVQARIKDLKRYRDIKVVGVDRLDYIKGLTHKLHGFEQF  
LTDYPKWQGKVVLIQVAVPSREDVKEYQDLETEISCQVGKINGKFSKPEYTPHIYMHSRIP  
FTELTALYSIADMCLLTSSRDGMNLVAFEYIACQEQRNGVLALSEFAGASVFMADGVVQ  
FHPANIKEMAQSIDKGLSMSKEERKERYDRLAKFVHTNTSAKWGQSFVTELSKSHV

>5234\_t gene=5234\_g

MHTELVWMAFASTAAAGILPLLPEPELTFATDNGWLDLPPKPVSAALGAALLPFLFPQSNP  
PAVPHTQAAPAPVPPSATSSSSSSSTTPAEVASTSPAGSINQGTAAASSTLAASSTAATSSL  
TGTSSSSSAEDVNYCAGSQSNQQPSQYWLQAQDHTSEARGYAPYVQGNPQYPVYRDVI  
EYGAKNDGSGNQTDALQNAINTDGVGGSREGKGSTNMPAEVFLPGGVYTGSTLRL  
GTIIVGDPLNRPIIKASPDFVGTSLVNGQDPASGHPETVFMVAMRNVILDTTAIDGSNTFT  
ALQWGIAQGCSLSNVDINMPQGSSGHIGHLNGGSTIAVTDVTINGGGIGIQNSNQVNF  
KNIHFNGCRTGFAATGGFTVILQAASFLNCGLGIDMTKNSLGSMVLDSTSTNTETLIK  
HDSSNDPGRKNSQIVIENYNSEGQYPLAVTSDGRTVLNAQSHVDTWIYGNIPGSFMAG  
ETHTSRPGALLDNSGRYFIRKQPDYANYPADRIVNVKKVAGITVKGDGVTDDTSLNA  
ILRENAAKCRVTFYFPYGVYLLRDTLFIPPGSRIVGEGWAVLSGAGGLFTDPYNPRAVVKI  
GYPGDVGIVEIQNMRFTVAEVLPGAKLLEINVAGSSPGDVGLWNTLTTVGGTADTTVST  
SCVNQDSRYCMAAYMHVHLSSESSAYIENHWGWTADHNLDGGPSAIISSGRGILVEST  
RATWLVGTSFEHNWLYQYNLHNARNLFAGMMQTETPYMQGQAIETVPAPWILSNDY  
HDPDYSWCDASDQHCRSALATNIDGGSNLMLYGSAAWTFEGPWNGLYNTPCASGVC  
QSNMMRVTNSPRNLAWYSINTKSSDVMILDGLSNPREFNPPGGWSGVIQAYRQFG

>5247\_t gene=5247\_g

MLKYLFGIVVVSFYATQILDLSRYRQKLDHAFHWEFWLGYTEGLKSSSLPNTHDWS  
WILETNEFVPNKYQRTPYVANGYIGQRLPAEGVGYWIDINEDGEYMNNSWPLDQPRAT  
FGTVSGFWNLQARTKHVLLPDNLKRGGESVISGIPDWTGLLITTSQGQIYAPGVKDAV  
TEFYQSLSIRNGLVHTNVTWSPTNSLQFQLNFTVLAHRTRPNVGVRLDLSTNRKANCSII  
DVLGAGAVRARFNDKAFETTDNAIWTSVKPIGIDYKTAHVYSTVEYESADAELLDHID  
QTRKDATRSPVSRNSSTIAQSWDLFLDNEKSVTLYKYVGIASDDAFPRATYETAMRSA

LEAKAMGWNSLLEEHELAWDNMWESADIIIFGDIKLQTSVRASLFHILSSLRSSDEAGSGI  
SDSSIAVGGGLSSDSYAGLVFWDADTWVYPSILALHPSHASTINNYRSRLLPQAIQNAKFY  
NYSGALYPWTSGRFGNCTGTGVCKDYQYHLNTDIALAHWQYFQSTRDFS WLREKGWPI  
IKNVADMFAAYVVLNETTKEYETILLGEPDEFAYFKNNGAYTNAGIKKLLGQIGPAAAN  
AVDQAIQHNWSTIAENIRIPIDHKNNITLGFDMQGDWVKVQASVALMNYPLEYQISEE  
HTRNDMAYYSSVNTADGPAMTWSIFAISEAQLQESGCAAYTYLVRSGEPLYFRPPFYQFS  
ETAVDNYENSDDFNPAFPFLYPAFPFLTGAGGYLQVFTHGLTGMRPHLDYLLFFDPTLPP  
QIPDGVTIKGIKWQGASFEISIQLEYTTITRQELSVPADKVPANIRIGKQNSSHGDKLLGG  
DKLRISTRPRDRNNTTYNGDSNLALCRPVDVNTAFSELQEQRWVFGHYPASIVDGSNAT  
VWQPLSPKRASVTISFGRKVNVTEMIVNWGSTPARGFTIHGHEDNGIQTTLTLLYETNQV  
EISAPFNASDINEVKIREGNTTIVQLPEAVEATAVSLTIEGTQGDEQRLGATVAELIIL

>5248\_t gene=5248\_g

MKSILAIGLWACAVAACNPHNPTVVVYSHFPTTVRASQITLTYSPSSYVFGSKTTPINV  
PTQAATECIVTPLGWGQDDSGQIMAAVEKCGTDGVVTL P APYVYTITQRLYMKLVRAR  
LNIFGTLSEPHLGYWIDNSHRVEFQNSTAWIVEGSDSIISGGGWQQGGINGNGQSWYG  
RAAGQSNQYGRPISLTIWQGNITVENFSIRQPQFWSFYIQDSQDVKLTNIYINGTNTDPA  
GNSSNYETNVDGFDSVRINGLETSNWL FHGGDDCHAPKGNSTNMVFHNLCVGGGIAF  
GSIGQYATMPDYISNVTATNISVAQQISPQYGGANVNGAAYFKSWVGVAEGSPQGGG  
GGTGRVWNISFSNLETHNTTQALYINKCYYKVADQANYCDTSTLKFENMTFTNIKGV  
NSKYGVSLNCSAKAPCQNMKFMDDLMLLANGTEAGDYCDHVVNSTGITC

>5249\_t gene=5249\_g

MLSTILAAALAGHVALTGGHAIHKRVTTTPAAYASNSDGSYALTSIAAPVQGAGSPGSEST  
WQLTIDDTSYGKQTITGFAAVTDATVTSFNTLSSTELSQLNLVMTSAGADFSLMRHT  
IGSSDLSGDPAYTYDDNGGAVDTSLSGFNLGDRGTAMAEMLAKMKSLQSDLVKLGSSW  
SPPAWMKLNNVIDGSTTNNNLNDGYLGTGVGSAGYSSAFAQYFVKYIQA YEALGANIN  
AITIQNEPLNSQTGYPTMYMFDYEQGDLIQSYVGPALASAGLNTAVWAYDHNTDVPSFP  
QNVLNTASQYVDTVAWHCYASSLDWSVLTDFKNSNPDVTQYMTECWTPASGDWYQA  
SSFTIGPLQNWASGVMAWTLGTSSDGPLHSSGGCDTCQGLVTINSDGTYTLELAYYM  
MAQYSKFIPTGAILNGSGSYTSGSGGIESVASLNPDGTRTVVIQNTFSNDVYVTVSTSS  
GQEWSGNVPTESVVTWVLPVAV

>5266\_t gene=5266\_g

MDIANGCCRQLALMKFFIPTFLATAAIFISAAACSTDEDCSLNGICQRGSCLCDPGWMAS  
DCGQLDLRPATRYTGYNRTSEGISSWGAKIVHDPFDSKTFHLFMAEFVHGCGLSYWTPY  
SRVIRSTSSTGPEGPYQFDGEVVGTFAHNPTVVYSEADRLYILIHIGCPITVPDGCSSPGPF  
TCGPGQTNNGESGISAWSSPDLRNWTFHGQVMPGNANGTWDSDTTNP GPPLWSANDH  
TNQMLMAYRGCVWNCGDGLEQIGVAVAQDFTGPYIRAHKHPIFPDNTEDPFVWRDKR  
GNFHMLVHSLEAGGGFGSGPKVGRHAYARNWDGEWYNNETLAYSTYVTFDTGTATN  
YSRRERPQLFFSEDGYLTPLFLTNGVQEAHSSQSYTIVQPIGDGANNYVKSLSK

>5277\_t gene=5277\_g

MHSATLLPALCLLPLVAGLPFSERVDQVLRSDPTSRNLNSRGPKSSKHGGTYQTQFTGVT  
WDQRNWRLQSTVLDQGHYESRGSIANGYIGLNVAGAGPFFELDTAVDGDVINGWPLFS  
RRQTFAGLAGFYDLQPTTNGSNFPWLDQYGD SAISGVPHWGGLILDGNGEYLDATV  
DNSTISDYTTTTYDYKAGVLSWDYK WTPKNANGSFGIEYKIFANKLDVNQAVVQLSITPS  
ANGSASVVNVIDGYSAVRTDFVSSGNESDAIYTAIKPVGVSNTAWIYAALDGDDAFDF

SSATLVKDKPYVHQNDSSIAQSVNVNFTAGTTITINKFVGAASTDAFPDPQSTAREAAALK  
ARRQGFDDLFRSHISEWAQVMPDDSVDDFTLANGTLPNDTFIIESAVMAVVNPYYLLQN  
TVGPNALLRVNAPVNDWSIPVGGTSDSYAGQIFWDADVWMQPLVAAFPEAKRIT  
NYRAAIYSQALENVKTAYTSSQNQTSFSSDAAIYSWTSGRYGNCTATGPCWDYEYHING  
DIGISLVNQWVVSVDNDTFKNEHFPIYNSIATLYGDLLKKNGSYYTLTNMTDPDEYANN  
VDAGGYTMTLISQTLNANAFRKQFGMDENTTWTEMADNVLLIRENDVTLEYTTMNS  
VAVKQADVILSTYPLDYTKNYTTSAALNDLDYYALKQSPDGPGMTYAIFSVIVANDVSPS  
GCSAYTYAQYSYDPYIRGPFQFSEQLDDYANGGTHPAFPFLTGHGGANQVVLYGYL  
GLRLLPDDILHIDPNLPPQIPSVKYRTFYWRGWPIQAASNYHTTIQRATSVAPLSTADHT  
YANRSISVQVGQNTVNSTTYSLPANGSAIVVSNRQIGTINTVAGNIAQCKSVLSTDAYQP  
GQYPISAVDGAASKWQPEFAANISLTVDLTSSNASTVSGFYFDWAQAPPTNITVLLHN  
SSSASLTSSTSKGGKSTVSLNVTISNPYNASTYNANVIALSSSNTTNYTFPVPVSKPRYAT  
LFVQGNQALDETDLKAGNGTGATVAEWAVALS

>7279\_t gene=7279\_g

MSTLNNPVALLKAMLARIPLIKTLVYHGLQVTPASKKQDLRTEMTVAIIRSFLDMSISA  
GTQQRSMNDPGIKGPMWVSKVTLPAPEDAVADAVLHAVKTLSEGDAYQLLQLPPVK  
AVEAEWTGYRSGVDRNAPLDIPEQEKEYEALTAEAKSDLVIFYIHGGALYLMDPCTHRV  
PVAHICKLTGARALNVRYRLAPQNPFAALVDLLTAYLTLIYPPEGSYHDPVPANKIVFA  
GDSAGGNLSLALLQTLTLKRTSKTVQFHGREVSIDLPAGLSLISPWCIDITRSMPSVHDF  
VYDYLTPPPHEPSETMYHPTAETPDSIWPSPNPPRSDMYCSARLVDHPLVSPLACSKELWE  
GAPPVYITTEGEEALDDELLTARKIYHAGVPVIVEQYEGMPHVFGFIMITTPAGKLFQ  
WSQFLRDVLGAPLQSSRGDLGKVIYHQAGWHSTKVVSLLDKVHKFSDAEVEKVLDRSRD  
HRVEWEKKLNEEWQAKARL

>7294\_t gene=7294\_g

MSFSLMRWASLIMLGMQASQVSAISQISAVGSKFFNSSGHQFYIKGVAYQLTDNDPLAD  
TAQCLLDAALMSELGANTIRVYHVDPNADHDGCMSAFEDAGIYLFVDLETFNSAIDQSA  
PHWNSTMLNAYTKVLDAFHGYDNLGAVFVGVNEVLTMTNGSWAAPYVKAARDVKA  
YRDSKGYRKIPVGYAAADIADLRPMLQDYLAACSTNSSEDLDFSLNAYEWCNDTFTGS  
GYSELQKNATGYSIPIFFSETGCNTSPPRTFEDQSAIFGDDMADTWSGAIYEWIEEANNY  
GLISYGPSVAATATGTNIVGGYTRGGTPTPVPDFSNLKS VWATLNPTGIALSAYSASAS  
KITPLACPAETSGIWDVNPTAALPTIGQTADASGTGSSGTTTGGSTGTASGASSTATSSKG  
AAPAGIVTPGSAGATS AVVIYGALVGFTGLMAWWL

>7337\_t gene=7337\_g

MRSYQKWAVLATLSVVIPVVSFAREGTDKFPTVDVNLNGTYHGVHSQHVDQDVLGVPYT  
QQPVDDVLLQIPHSLNTSWTKPRNATEYSPSCLGYGQSEGASESCLTLNVVRPGGTKLE  
DKLPVAVWLYGGGFTSGSSTDQRYNLSFIVEQSVKMGTPMIAISLNHRLHCWGLMW

>7362\_t gene=7362\_g

MVGS GFVHSSQNDRSQGLDWRAPTARSSGNLGGYGFASKNSNGNGNGGGSGGGAG  
LGKMNSFFGGKKNRDLPVYKDKPYFKPRRTGPNRTASRVVYGVVACFMMMLLYVFW  
GGWGPVAVGVPVGEIGENLWKWTQTLDAEEEAASSKNVDWEERRERVKDVFTISWDS  
YEKYGWGYDEYKPVSKKGRNMVEGGMGWTIVDALDTMILMNLTSRVQHARHWIHNS  
LRYDQNHVDVNTFETTIRMLGGLLSAHYLSHNHPNLAPITDDDPGAPGEDLYIEKAADLA  
DRLLGAFESPSGVPYASINLNTSLGIPSHADGGASSTAEATTVQLEFKYLAKLTGEAEYW  
EIVEHVMEVVDNQAEDEGLLPFIYADKGQFRGRNIRLGSRGDSYIEYLIKQYLQTSERGE

PIYKEMWDEALTGISKHLITYTKNGKLAFLAERPDGLDHALLPKMDHLVCFMPGTIALG  
ATHGQLLSKARQSSWSRRQDEEILLARELMKTCWATYLATATGLAPEITYFKTENPPL  
MLSDVYPNSALLPPRSSKDDSYTPGELDLISASLEDKDVWKSDEIHAQDTHNLQRPET  
VESLLYMYRITGDEQYREWGWMFKSFVKHTAVVEKVSPSDHEGDNNSQGIIDSSHDA  
DDQSHTSYRLVGFTSLSNANIDPPMRDNMESFWMAETLKYFYLLFSDRDFIPLEDVVF  
NTEAHIFPRFKVGGDLKTGWSRKPRE

>7365\_t gene=7365\_g

MLWVASLLLLTPAVTAQASLYGQCGGQGTGATTCVSGSCTYSNAWYSQCLPCSGG  
SGTTTSSLTSTTTKPTSTSTSSSTSTCTLPSTYKWTSSGLANPASGYLSLKDFSHVPYN  
GQHLVYASDVNTGGSYGSMNFALFSNWSQMASATKTQMSQGAVAPDLLYFAPKEIWW  
LGYEWCEWAFCYLTSTNPTNANGWSSPQPLYEGTSGTGPIDPAIADSENVYLLFFAGDN  
GNIYRASMPIGNFPASFGSSAQITLTDSTYNLFEAVEVYSVQGQNL YLMIVECIGSNGRYF  
RSFTATSLGGTWTQAQASTESNPFAGYANSGATWTKDISSGDLIRSSADQTKPVDPCNLQL  
LYQGRSPSSDGDSYNDLPYLPGLLTLSK

>7366\_t gene=7366\_g

MNSAALAVALNGIVALGQVTINPSTTYQTIDGFGFSEAFGFGAPIASASASIQTQVTNYLF  
STTTGAGLTILRNRIAAGSGSIEPNAPSGPNASPTYTWDGNDAGQVWWSKQARANGVE  
YIYADAWSAPAFMKTNDNVANGGYLCGTTGETCSSGDWRQAYANYLVQYIKDYESEG  
ITIDFVGWLNEDYSPDYDSMLITSGTQAASFIPTLYNTIKSAGLSTGIACDPFGWSDAV  
TWTACLASAGATQYLARITSHWYASQGTSPISTSLRVWETEYADLDDAFTTAWYSSGA  
ANEGLHWANLIWQGLVEADLSAFLYWIGAQSNSNAAALVTLNGSTVEASGSLWAFAM  
FSRFIRPNAVRVSTSGSPSNVNGAFKNTDGSFVVVAIINNANSQTISLSGITASKVSAYY  
MDSSVSSPSTFSATLGGTVGGSLPGRSAVTFVITGSAGSTTTTSTKTSSSTTSTSTSTTST  
SSGAAEYGQCGGQGTGPTTCVSPYVCTYSNPYYSQCLPA

>7367\_t gene=7367\_g

MFFFRFLATVLLLLNSKFVAAQTSNTSSPVHWDKYSLSINGERLFFVAFGEFHYIRLPVPEL  
WLDVFQKLKANGFNAVSVYFYWNHHSASEGVYDFETGGHNVQRLFDYAKEAGVYIIA  
RPGPYANGELSAGGFALWAANGRLGKERTSDTQYYDLWSPWMTEIGKIIAANQITEGGP  
VILVQHENELQETTHSANNTLVLYMEQITQVLDDAGIVVPSTHNEKGMIRSTSWSTDYED  
VGGAVNIYGLDSYPGGLSCTNPDAGFDLIRTYQWFQNYSYTQPEFLPEFEGGYFTAWG  
GVFYDDCSSILQPEYVDVYKKNIGSRVTLQSLYMTYGGTNWGHIAAPVVYTSYDYDA  
PLREIREIRDKLKQTKLLGLFTRVSTDLLQTEMLGNGTGYTTGADIFTWALRNPETNAGF  
YVVAQDDSSSTTDVVFDELEVETSAGAVNL TNIGLDGRQSKIITTDYKVGNTILLYCSADI  
LTYATLDVDVLALYLNQGTGTFALANASSHLNYTVYGNSTVTTSSNSQGTVYTYTQG  
QGISAIFSNGLIYLLDKYTAWDFAPPLQLSDPIVKPDEHIFVIGPYLVREANIKGHTLE  
LTGDNQNTTSIEIYHGNSISSISWNSKHLSTKRATYGSLTATIPGTESISVSLPKLTSWRSH  
DTIPEIDPNYNSNWWVCNKTTTFNSIAPLSPLVLYSGDYGYHAGPKVYRGRFGSTNATG  
VNITAQNGYAAGWSAWLNGVYVGGVTGNASIEATSAVLA FNSSILKQNGTDNVLTVLV  
DYTGHDENDVKPAGAQNPRGLLGAVFVGSTTTNFTSWKIQGNAGGEKNIDALRGMNE  
GGFYAERLGWHLPGFDPSSSRGGGGGKGDWTKSPSEG VAGGQHRFYLTFSFLDLGANS  
HSLDIPIGIKLNASSTSGPAVVYVWLNKYKFAHYLPHIGPQTVFPFQPGVLNIQGNMGHK  
RTNTLAISLWALTDEPAALEVVELVAYGTYTSSFDGFRDWSYLQPEWVDRSEYA

>7380\_t gene=7380\_g

MQILNLISSLAIATAVAAPAARCDSSPSTSGIESLLQRRLPQHTDSFDFSIVNATSLGE

NDVYAVSTGENGKIKVEGSSLSALATGLHRYLADVAHVDIYWFIGSRLDQINGRLPQVD  
ETLTGSSVVPYRYHFNTVTTSYTAAFWSWEDWELQLDWMALRGVNLPLAWIGVEKIFI  
EVFQELGLTDAEIAFLSGPAFLAWNHFGNIQGSWGGSLPYSWVDSQFDLQKKIVQRMV  
ELGMTPILPAPGFVPRAITRVLPDANVINGSAWFAFPTLYTNDTFMEPTDPHFTEIQKFSI  
SKQTAAYGNITTFYTLQFNENNPSSGDLSYLKNVSSGTWQALKAAAPNATWVMQGW  
LFSSNSAFWTNDRVEAYLGGVTVDSDLLLIDLASESLPQWQRTNSYFGKPWIWCQIHDY  
GGNMGFYQVMNITINPIAALNNATSTLVGFGLSMEGQEGNEIVYDLLLLDQAWSAAPID  
TATYFHDWVTARYAGSKSIPTDVYNSWDLRRTTVYNNTNLASNAVPKAIFELIPSATGL  
VNRTGHHPTTLNYHPADMVKAWSLFYESAVKEPSLWLNPAYEFDLVDMSRQVLTNAFI  
PVYQDLIAAWNTSNPSITKIQTIGAEILIGILTAVDTILSTNENFKLSTWISAARTSAGQQL  
EDFLEYDAINQITLWGPAGQISDYASKSWAGLVSSYYVPRWEKFIEYLVDRPAQYNQT  
AFNAELLKWELQWQNETIAAATKNGAENKVAGDVEVVLEGLVGAWKDFST

>7414\_t gene=7414\_g

MSYRAPFVPAIKKHTATVIMAHGLGDSGAGWVGLAQNWRRRSKFDEVTFFPNAPMI  
PITVNMGMTMPGWYDIAHLGQDMDFEEAQRNQDEPGILKSRDYLNLSLIKQEIDKGIEPS  
RILGGFSQGGAMSLFTGITSPHKLGGIFGLSCYLLSTKIKEFSPPGGELPNAKTPFFIAHG  
YDDPVVKYKFGDMTQKRLKELGFDVEFHSYHGLAHSADPQEIQDLEDFIAKALPPTSEE  
SAGL

>7431\_t gene=7431\_g

MNHRTVISY TALVVFVASVVIWLRNYHSLPAISISEPAHLPMYWFAFGDSWSATGFNISS  
TQPSASNPMGNATPHPGTQSGGNNWVGYLTTQYNTTLTLTYS LAIAGATIDNSLATWGF  
GDMNSQIDAFQLYYASRPAYAPWTAGNTVASFWIGINDVYYGFAHDDDPSRFVSALMD  
RYRPLIEQIYSSGIRKFLFLNCPSTRSPQVHEENDLPEQFQRHAEMVTAYNNGLNMF  
QFSDKHKDATVVFYDAFQYMTRVLDNPAQYGYHDATCMNTDGSNCVWWNLHPGW  
RYHQLQAENMLPILPLGW

>7442\_t gene=7442\_g

MATKFIQSELIRVPYKEVDGTEIPTDVHIPLGKATSDHELAPVLMCHGGGFILGWSRMN  
NADTIDDCLERGWIVLSIEYRLCPGVDLLQGPI TDARDVLRWVQTGGLATALEKASISIRP  
DPSRVMAMGASAGGHLALSMAWGVEKPLAILDFYGPTNFDDPFWLHPVEEVRSLPS  
MLPNSAFEHLYQEKT VFLGGISLEGQQDIDGDRSVPMQPNLNDKRQLFAMQAI AQGKV  
LGSIWPAFPNDLDIVDPARNVHRNWPTAIVHGTADAMVPMYLSQAFESLLKEQGVETE  
FIEVEGEPHTFLGKMVKGSKTWETQRRGFNFLERILKLSYA

>7447\_t gene=7447\_g

MKLIPTLQLLLAATTALAAPSLDEISSISRNNRVGPKCPFPLPETGKRHKVCNVKSHGN  
GRDDSKHILAALKSCNNGGKV VFDKNY TIGTALDIQWLKNIDLITGTIQTNDTNYWIN  
NAFQIVFQNSTTFFKLGGEDVNIYGGGTIDGNGQVWYDLFAQNATLQRPILMGHGLEGG  
SIGPLKLRHSPSWYHVVANSSNVVFDGLDISGYSTSAHVAKNTDGWD TYRSDNIIQNSV  
INNGDDCVSFKPNSTNILVQNLHCNGSHGISVGS LGQYPGEVDIVENVLVYNISMFNASD  
GARIKVWPGINSELEASLQGGGSGSVKNV TYDTMSVTNVDWAIELTQCYGQSNLTL  
NEFPSNLTITDVYFKNFKGV TSTKEGKD IATLVCS SPHVCSDIYATDINVVSPSGYNQAIC  
TNVDDSLALNCTA

>7468\_t gene=7468\_g

MRVFHLSALVAMYGVLSATLAGSQIVVPTIHGFQPTLADWKAARAKADAFVGKLTLD  
KIAMVRGNATAGVCSGTIAAIERLDFAGICMEDGPNGVNYNDKVHVFP SGVTVAATWD

TELMYQRGLALGAEFRDKGINVMLGPVAGPLGRSPHDGRTWEGFSPDPYLTGLAMQAT  
IQGVQENGVQTTAKHFIGNEQETQRTNTTLANGTQVAAISSNIGDRALHELKYLWPFADA  
VKAGTSGVMCSYNRLNGTYACEDSDALITILKTELGFDDGYVISDWSATHSAARSANGGL  
ELEMPTYGTSAVSTWFIPYLPQAIANGSISIDRLDDMVGRIMTPYLLNQDTPDEPDES  
MIYMLLMATIGLPEVKQFPPSIGGGPWQNIARDVVRGNHSAIRKIGAEATVLLKNEDNIL  
PLGSYSEIGVFGSSAADFVDGLAYWAMGFVDFGPEFGPIAVGGGSGSVRFTTISAPLDAIK  
AKASKEGARVQYLNTNNTAIAANEITFYVPDICIVFISQFTAEATDRDSSLASDNSTAVVE  
NIAALCNNTVVVINAPGPLVLPWAQNPVVKAILAAHYPGDQIGNSIVDVLWGKTEPSGR  
LPYTIPANSSDPNIINVSEPGPGGWESTFTEDLFIDYRAYDANGAEPAYEFGFGLGYTTF  
NLTGELEASITAFNHTATPAKLATAPGGNPSLWDEIVSVKATVNLVGVKVTGKAVPQLYL  
EFPESSPEGTPVRVLRGFAKLQLDPGKDGVVQFSLRRRDLSDYWDTHKQEWVIPTGAFTIN  
VGFSSRDLRASTQVTVLK

>7511\_t gene=7511\_g

MIDHVLGRPSTQFRKIQVLAVVSWFSLYLFRGNNHGPPGLRNISTNLRNRLTPWQTMVIT  
LLWLYVARNFSKIMGFESPEPLANLYSRSYFRATWITTALDAGFWTAMKVRPKWLKDI  
ASMVFTAAYLIAAEQADEKVRVRATLTVEHLRVSWNKATTPYLKFFNGLVRPRYTKY  
APRQIRIARPKESSYREPVNAWLYFDGTLAELREQTQLVLDVPPGGYVAMDPRTADDKL  
LAWAGKTGVPILSLDYKKAPEFPYPYALNECFDVYRAIVASRGRCAGLGGHSRPHIIVTG  
DSAGGNLATGMTIMILQSGRTENRKWLGEVPLPPDGLVLIYPSLDMNIGSWMTEEQMS  
LIQDRGMRKTNERVLRKSESDYSLTPKSSHSLSSDHDQASPVKDYFSKRPQNKDSEK  
SATKMDPIAQNQPTQIKTRIAVSSMISYFGDRILTPEMMRAMIILYIGPHHRPDFKTDLFLS  
PILAPDAILATFPKTYFITGERDPLVDDTVIFAGRIRQAKLHRFRERQDLALEKSRVEFNEK  
DHVEVNLIPIGISHGFVNFPGIFPDGWKHIHKCARWITELLELAQRDLRASSSSIASTAEK  
SLRASESKDFKQVQKQPDSSRRGSLAESSADEDHPLEMSVTRFTPIKQSVVEGKEANGNEP  
SRSDAQNKSATDRSMRKDSFPSTKQPRAHRPSLSTSNPKPLSFPLHLPLKTAKSSKNNT  
DTNGFQIASLDDDDDGTKSIVSENGKTFTRLPSEEDLIGRRMDGLAGGLMGLGEGARTP

>7525\_t gene=7525\_g

MVVVNDVEYLCDEERRLKEDRERKRYWKKWGPYVAERQWATVREDYSENGDAWSH  
FSHEHSRSRAYRWGEDGIAGVCDTHGQLNIAFSFWNEKDDFLKERLFGLSNPQGNHGES  
IKECHFHLDNTPSHSYMKYLYKYPQKKFPYQDLIDENARRGRQDREYQLLDTGVFNESK  
YWDIFIETGKEEDDEEIEISFRVIAYNRGPEPAPLHIVPQVWYRNTWTWGWEDKSKKPIIK  
QESPLKVKTSHHALGDRYVTLSPSPSFGSEEDIQPRMLFTENDTNNEALYGTKNDQPY  
VKDAFHRYIVDEEKDAVNPNEGTFKFAAWYAFDEGDGVPPGECVAVRFRFSRKNEEYY  
NEEELDNVIEQRRSEADDFYYRINPLPMAEDLRNIQRQALSGMLWTKQYYHFIWDQWA  
NGDPAMIPPPPGRKNVRNQWRHMYLDDILSMPDSWEYPFFAAWDTAFHCIPLAMVDP  
EFAKKQLDLLTREWYMHPNGQLPAYEWNFGDVNPPVHAWAVFRFTFKIERKMYGRQDL  
DFLERVFQKLLNFTWVWNRKDADGKNVFEGGFLGLDNIGLFRSEPLPTGGVLEQAD  
STGWMFYCLSMNLIALELAKHRRTYEDIAASKFFEHFILISDAMSFRNQDGETSLWNDED  
SFYYDSISYGGPWSQQLPVRSLVGLIPLYAASLEPEIINMFPSFKRRLNWFIEKNNDVAE  
RNIASMSHRGKDDRLLLALVSKDRLEKILKRMLDETEFLSDHGIRSLSKYHEKNPFSMDV  
NGQKFTVGYVPGSDSGLFGGNSNWRGPIVICVNFLLIESLLRFYMFYGDVSKVECTGS  
GDYMHVGHVAEEVQHRLQHLVYRDYDGRRAINNGNDLLDFDEHWRDYLWFYEFFDA  
DTGRGLGASHQCGWTGLLAKVIHDTGLNCRLPQTPRTPPTAAAHYFDDVFSRPGRQAK  
GRRRSRLLRRSSTSRSIGNRSDFTASVNGAEDEENEDATSTNGGDNHMEENFTTYIADQ

LSRVRSSATLGAYEDEF TTGVDRNGTNGTNGH

>7530\_t gene=7530\_g

MILFQVVQFFAATALAAAATADLSRRQSSSTTAVVDLSTNRGGTKHLAAGFIYGIPDSET  
QIPDHWYTNMGFEYNRGGGAQMDAPNRGWVWGLNEYKGRFQSTLSNYQVTRKFGGT  
FIILPHDIWGTDHTNSSTHWP GDNGD WTSYDAFLDQLLSDIKANNMVEG SVFDIWN EPDI  
SIFWVRSSTQWVELYVRTHQRIRSDSALNAMQISGPTLAYRPSSSNSWWT SWLQAIKSN  
NTIPDQYAYHLEGATTAVDNDLQTSNQTLGALLSQYGLPQRQVNINEYANTGEQVPAG  
AAWWISRFERYDTIGLRGNWRGGCVLHDLFADLLTKTSNPNSCGATDYAPAPEYPVYE  
YYNLNMTGHRVATQGS GDRQIDVYATVGS DGVVRVLSGVRINTGTWYIT IENLSSVGLP  
TSGTLNIQTWGFPGGSSVFSTASGLQNKGVASHSYSGNSVTFPVYQTD TSTAWAFEFKA  
GSGTSSTTTVGSSTTSTTTSPAATQTHYGQCGGQGWGPTQCAPPYTCETENAYYSQ  
CL

>7531\_t gene=7531\_g

MKYLTIAILASTAAALNGLAVTPQMGWDDWNAFGCSLSQSLILSTASVIVKTGLRDLG  
YHYVILDDCWSSGRGSNNQIIPDSSKFPNGMAWLGDQLHAQGLGFGMYSSAGTKTCAG  
YPGSLGYETVDADTFASWGV DYLKYDNCNNGEAGTQAASSARYEAMEKALAAASGRN  
ILYAICNWGQDSPWIWGPSVGN SWRITGDITDSFNTENSVCVPVSYGGYGCSVTQILSKQ  
ATISSYSAKGGWNDLDMLEVGN GMSDSEYVAHFSLWAAAKSPLIMGNDMTKLIASD  
YSILANPAVIAVNQDPLGVAATYRWTQNNVQLWSGPLVSTSGSSVNDQVVALYNNGGS  
NVTISASISDIFGSSSVPSAQFEIRDLWGSRLSDSQAQTILSNGAAANPSWLYNATAKSYA  
SGLAQGDSKLLGTSIGSVTAPGGSISVSVPGDGCRILRLRAVTSSSTSTSPPTS VSTTASTT  
TTTTSPSQPLQTHWGQCGGQGYSGPTQCQSPYTCQVQNTYYSQCL

>7532\_t gene=7532\_g

MEGLKIASLLRRYAYFLPLALFSVGVV KADNPFVQTIYTADPAPIVYNDRVYVFM DHDN  
TGATYYNMTDWHLFSTADMANWQDHGIPMSLANFTWANANAWAPQVISRNGQFYFY  
APVRHNDGSMAGVGVSSITGPHYDALGKPLVENNEIDPTVFIDDDGQAYLWGNPDL  
WYVKLNQDMISYSGSPTQIPLTTAGFGTRTGN AERPTTFEEAPWVYKRNGIYYIYAADC  
CSEDIRYSTGTSATGPWYKGVIMPTQGS SFTNHEGIIDFQNNSYFFYHNGALPGGGGYQ  
RSVCVEQFTYNSDGTIPTIEMTTAGPAQIGTLNPFVRQEAETA AWSSGVSTEVCS EGGID  
VGYINNGDYIKVKGVAFGSGAHSFSARVASAASGGTIAIHLGSTTGTLVGT CNIPGTGGW  
QTWTTVTCVSGASGTQDLYFVFGGSGTG YLNFNDYWQFA

>7534\_t gene=7534\_g

MKASSAVLLGATIFTHHAAAAVFAHYMVGGITQDHANTDVQDAIKVGFDAFALNLM  
STEDWSTEAVASLFTAASGTDKLF FSFDMGHFSDPSQFLPILEQYASHDNYYLYDSKPF  
VSTFDGGKLTFGSSNPNTGWQNSFKDAASSAGVDVFFVPDFDDASGYPNGFFDTFSVVD  
GAFSWESA WPYEDAGFANVSDTV DSSMIEAAHNAGKIYMMPLSTFQFKHLDTSDNWY  
RRGESNLYVRMGQILDLPDLVEVITWNDPGE GHYIGNFWNESLGD TNIYEYAGGFDHT  
GWQKVISPFITAYKNGVSAISDITASSNIGTMWYR TLLTTASCSDDP IGLPRSHENAQDAI  
NYAHLADSGSDYTINIYSNNNLIGTAEGVTGLN GGSVLGLAAGSADTQRVEVVETGSDG  
ATTTILAAATGTKNVVAETS GICNYYEVVAMTG DASAAGSSEAASTVAAVVSTSSSSAT  
STTSTPSASSPATLSPTPTLETAGASSAL TTSSTSTSI STLPTTSPETATTTSTTTASSP  
SGKSGCRWDPSGARC GSGNFQGRSHGFNRHVHGGGY

>7582\_t gene=7582\_g

MGSVDEFDYVIVGGGTAGLTVADRLTEDENVKVLVVEAGEDRSKDPLVLPGLVAGM



YGNPDYDWNFNSVPQPGLNNRKNQPRGKQLGGSSALNFLMLVYPNRGSIDSWKALGN  
EGWGYDDLAPYFRKFATVHAPPQAAKDVVGLTYHNESLIGDGPVQVSFSEGYGPTNSA  
WMETFAKFGLEMTADMRSGDALGAFQQPGSIDPATKTRSYAATAHYTPAIASRPNLTL  
TGTVVKKIIFDTTGPEPVATGILAQSKDGSEKTLNAREVILSAGSLMSPQILELSGVGSKSL  
LEKHGIPVVIDNPFVGENLQDHAITCQSFEVNPDIASSDVLDPVAVLNALLGMYQASREG  
PMGQSNISVAYAPLTDASGISSAETKKSFLAIHDQHTQTLDGQIIRSLEKEGGPTAQYLL  
FPGQANTYLAEPSSMMDYLAPSQPGNFITIMSLLNHPFSRGSVHINSADVHQLPTWDPKF  
NSNPLDLEISALHAMFVEKFAHTAPFSNLLKPDGARIPK GKADSVEAAKEVVRETQVSDF  
HPSGSCSMRPKDKGGVVDTRLRVHGARGLRVVDASIFPFVPLGNIQSVVYAVA EKAAD  
LIKEDQLNKA

>7594\_t gene=7594\_g

MAHPQPSPPGGVPPHHGPLAAHPQLNGHIPVQSAGQKGPPLTTAQKIAALNEQVWLQIG  
SLTELMGDLGAMAAAYEQALRHNQWSIPAMTAISQIMRTREQFPAIEYLQQLKLDPO  
SGETWGS LGHCHLMMDNLQEAYTSYQQALYHLRDPKEPKLWYGIGLYDRYGSLDHA  
EEAFSQVMRMAPDFEKANEIYFRLGIIYKQQQKFNQSLECFKYIVNDPPRPLTEEDIYFQI  
GHVHEQQKDFDAAQAAYRRVLDKDPNHAKVLQQLGWLYHQSTSYASQEKAIEYLEK  
SVSADNNDAAQSWYLLGRCYMSQQKYPKAYEAYQQA VYRDGRNPTFWCSIGVLYYQIN  
QYRDALDAYSRAIRLNPYISEVWYDLGLTYESCNNQTADALDAYGRAADLDPTNVHIK  
ARLQLLQGAQGTQGTGPAPVPQDIHPQAYQGGVGGAPPAPQWGAPAPTGGPPPQAP  
APPRQIADWNRGINDIQNAPQHPPQPSAGYEPREGLRGPAPGQHPSRQDLRSAPPEPRG  
PAPRSPAPNAYPQSHTLPQLSAPAPGPHDRPPNGAGFRGGPLGPNGAPAPGAAPPPGYPA  
RPFSPTEIRPLREISDRPSSPGPTYPHQQFHGPSIQGGAGIAGGAPPASAMTAADAAAR  
DRIDDRPSSAMKRGRDWDVSEVGNPKKIANEESRLRQDEIGRRATPPHELHRRSSSEARRE  
EQRRANENYHPSEAAHHPPTLPSIQHMQQPAGPSTIPPMSEGTQPSSNPPSAGPDNQPSV  
KEEAGRKETAPLHEPAARKMDVDEDYDDDGDGDDDKRAGAGLKDSRPNNGAGGSTNGNF  
GNGSSSAKSEAA

>7602\_t gene=7602\_g

MAEDMKHTLTNLSTRSTPHIRLNSGRHEPFVDMEDDGRERLKHTLSARSMRRSPVPAIIR  
HSAAPTTTTTESTPAGETGGGEALSEGGLISPPLISPTESSELLFPPPRKVRRSRGSQDRSKSP  
SVISYRRTSWDDSHSDLSRDSRGYPDFADSRAPSHASSDDENVNTQTVSEKYNIMPT  
GLLLFPEDVEKDDYLHNPDPADRERDCICNTRGLVNVGGLALLVMGIVALFIIYPVTF  
VDGVIQGARDPCTLDPMCISMTRPLLKNIRTGLIDPTTPKSAMTKKAADGTEWQLVFS  
EFNTPGRFTYEGDDPFFQGVDLWYGVTDLEWYDPAITTS DGVLQIQFDSYDNHNVSF  
RSGMLQSWNQMCFSGGRLEASISLPGRGDTSGFWPGFWAMGNLGRAGYAATTDGMW  
PYSYDDVCDVGITANQSSTDGLSFLPGMRLPACTCPGTDHPSPGRSRGAPEIDVIEASVT  
LDEMQRIGVVSQSLQLAPYDIWYLPDYDFTA VYNPSVTAINTYRGGPFQVQVASGLTNL  
NNNWDGKEYQIYAFEYAPGSKGNVTWVFGSEKTWTIDAQAVRPNGNIGQRVIPMEPM  
YPILNFGMSPSFAMLNWTGLQELWPATMRVDYIRIYQDPKEISITCDPEGYETTEYIKQH  
EDAYHNPNTLWSETGYDWPKNSFVDGC

>7626\_t gene=7626\_g

MALEVPAFSTKPAHFATLYDDATTKQNFDLIRIRTTDRLLHDPLAQTLNITKDSEEARL  
KGEISYTDILVDRVRKRVSESAGKKHELLS QLLHVGF AALFYFLQSNVTGPPLDFDSATV  
VFGETIAGNREILNSMRRRMLRDL SMDGEAVYQLTPNIELFCVAKAILVDAGVLIAGDAP  
LVAWTGRMRVNFHLHQKMLTEISGTLQKSIYDDLKISTTVLGEISSGKLTAFLLERA

AIHTHHGFDAKARSDLKAAVASGFYALTGKLGKRTKFQDRDITQLVVLAVSSETESV  
SDTAVSKQVSETSAPKALDLNDDTLLETIAFAKEGAQPEKSTTIQDESSLPPALAAIDPSN  
QPKLNPLDSAILLGIASAITNNSPEHGLTREETLPYAVRVIESGSTNWQIYTQALLVRSRCE  
AFKSRTVERGVLQMQUALVDQVIADTATSNAAVVTTNTVTNDQQEQPTTFLPRPQESESA  
PAERLEYLWILDFQTRWNLEAELAQKWVSLGGLRTALDIYERLEMWAEVALCYAATE  
REEKAKAIVRRQLYEPTNAGAVDDDNERYEGPELAQLPTDAPRLFCILGDIDSPTMYER  
AWEVSGQRYARAQRSLARLYLKAQPPAYEKAEEAYKKSLKINPQNHGAWFALGCVQL  
NREQWLEAVESFTRTVQIEQDDAEAWSNLAAALLNIPSNKNKTSVEANAETTVSEENGD  
IENTDGEKLLKEEDPYKHTRDAL TALQHAARKQTDPRIWDNIITVGASLPPQLIPYKDIVF  
AQRKVIELRSPKKGEKAIDL TILDMLVEHLINNYDDLLINVDGTDQKIVRSQTVAGQI  
MTLVDDVVVPLITHSAPLWLLVAKIELWRHRPSKAF AAHEKAWRATVSTCTQGAFQMG  
DEKRWNQIVKATERLVRDGYAKIGGMTKERADGSIPEGEGVGEEELVAKDWRFKSRSA  
IRGILSKGKDWEGETEGYAQLKELLREVDG

>5780\_t gene=5780\_g

MAIELDRFRNFTRTDYVYKEIDHIPLYATVLLPKQVPSGPRPVMIHFHGGGLVMGDRMY  
PDWFALWQLQFALAQGAIITPDYRLLPESTGVDIIDDLEDFSKWVHNVLQPKISELSSNIT  
LDVDNIMAVGESAGGYLALQSALLFSQSRSIAVICQYGVLDVDNPSFDQVPPQDLLSQQP  
SRLDEYLKSLKPGEIRLSSPFPEKWDVVEAIGREGRHRELIGNDDKLRLRKSLESASNVA  
IWLHGGQEDMIVGDSIPSILFTKLTMPRLKISVACTKDFASHLKQNRPETPLVYSILPGNH  
GFDGLVTMDVSWVQEGLEFVKEYWGNRRAK

>5781\_t gene=5781\_g

MWSALLLLGLYSGSALAHPPRLNDLAVKAGKLWFGTAADIPGTAETTDAAYLKLLKEN  
FGEVTPANAMKFMYTEPQQGVFNFTEGDHLVELAHNHQQIRCHNLVWVSELSDFVLS  
TNWTRDALIEVMREHIFRTVQHFGSNCYSDVNEALNGDGTFSVWYNTIGEDYFFL  
AFKFAQDALDEIGAQHVKLYYNDYGIENPGSKVDAVINLVDELRSRNIRIDGIGLESHFV  
VGGTPSLADQVATKSAYIQAGLEVAITELDIRFSQGPFTADAERQQASDYTSVASCVE  
VGQGCIGVVWDFDDAYSWVPGTFAGQGGADLFNATLEVKPAYYAVADALKSVPCSV  
C

>5783\_t gene=5783\_g

MASRQPGNSLTLLGKVDAVLGICSMGGGFAMDGKSHINLCLQLRSLKQNGIELAWF  
YSTYTLIPHATYPTQFCEAVETLNYIIHDLGRHPSEVILTGDSAGANLCLAILSHMTHPAK  
GVPRVTVQEPLKAIALISPWISFDHNWPSVRRNKHKDIEATDATALWSRIYLNMNPTNY  
YIEAMRAPEEWEEAKVQHTLVLAGEDEILVDPIKAWVSNFQV

>5798\_t gene=5798\_g

MPLGGGGLGVNVWVENNEILLYVAKEGTFDDNNSLVKLGRIRLALDPNPFQSQFQQL  
NLNDGYITITGQDKTALDLWVDVNAALHIELSSPVKEVKVKAAYESWRWTDRLMAY  
DEWEQSDWNQVEYIKPTPLTRADNISFVEHGVRFHQNPNTLDVVAEQHFEMYNE  
TMFNPLAYNTYGLYMYSPQLFPGPITSGHYMNTTFKAWNLSQSEATSNLSLTVFTFRKQT  
PDMQEFNATFEENIVNATQEIHENVKSWWHDYWDRSWIINEKKGEHDPGFTVGKNYQI  
FRYMQGCNWGAEWPMKWNGGLFTYDPYVVDPTNPWTPDYRSWTGGVHTAQNRLL  
YWPMLKSGDLDMKPQFEFYRRLTPVAMQRGRTYFNINASLFTEQLENYGLPSYLDYD  
TDIYFYNMSRPTSFPGLIEWNDWLEWLQDTANEFADMILQAAMFFDLDPYMLFIESQ  
LQWFDIFYQQYHSRIDTYSTAQIGGSSKLVIPYSGAETYKVAAYNPASTVSGLKKVLADL  
LQINPDYVMGNTTYQNFTDRVPETPLRYQQGYECISPALAYVRIQNSEVPQLYPVFPW

GEYGLGLPNLTRAINTYFYDTETQSFHGNTGWKQDVIWMARMGLTKEATNLTESRWA  
DSTVSRFPVFKGPNYDWAPDMNHFGSASIALQEMLLQTFVNNNTQIRLLGAWPNEWDV  
DFKLYAPFETVVKGFVERGQFENLTLIPSSREADVYGN

>5799\_t gene=5799\_g

MKIAATFAGLLATALAVPVANSDLVERSTPINYVQNYNGNLGAFSYNEGAGTYSMYWE  
DGVNGDFVVGLGWSTGSPRSITYSANYNAASSGSYLSVYGWINSPOAEYYIVENYGDY  
NPCSGATSLGTLSSDGGTYQVCTDTRYNQPSITGTSTFTQFFSVRQSKRSSGTVTTSNHFN  
FWAQHGFGNSYNFQVFAVEAFSGAGSATVTVSGS

>5802\_t gene=5802\_g

MAAISTKEKMEIWRDSADAATYEDARVGRVFNHRRPQRFPIAVVKATSQDEIKAAVKL  
AIERNCRVAVRSGGHSWAASVRDQSILIDLGNKGFVVDQENRLVRATPSVTGKELN  
GRLISEYGLMFPGGHCPDVLGGFLLQGGMGWNCRNWGWACERVRAVDVVTASGEL  
VRCTPVENPDLYWAARGAGPGFPGIVTMFHLELLPYAGGFRSSGYLYPSHMYRKAFD  
WVISITPGFDEDEIVLVSKYAEDSDELCLVLFVTMKNCPKEAENALISAQKTRPGGCIE  
EWFCQVDSLNDQYIAQGKANPEHRYCCDNAYIENNADVPAVLQDAFLTLPHRKAFAI  
WYAMNPCSRRKLPDMALSMQSDHYFALYTVWEDEADDERCQKWVHEIMRTVKSHSV  
GAYLGDSDFQVRQTRYWADDNAKRLMKIRKRWDPHGLICGYLDAGDVSGVNGLTNAI  
DQ

>5806\_t gene=5806\_g

MGLHNILKLFFLPLGLLPVFTPIVAAYANPGSCSGACNVHDPGLIRRVS DGKYSASLREIK  
YPMLLHHQSKGHGQLLGQFYRMAHQSISSRAMMIYGYVWVMTIHC GSKSYSDKLLKA  
PDASLVDGTYVYYSVSTFGSQESAIGLATSPSMNLDTWTDHGRIGVDSYTGSAYNAID  
GNLYLDGNTYYMQFGSFWGDLYQVEMNSAATLTAGTASKNLAYDPSGEHAEEGSYLY  
KYGNYYYLFYSAGICCGYNTSMPASGQEYKIKVCRSTSATSGFVDASGTCTAGGGTIV  
LESHGTVYGPGGQGVFTDPSLGPVLYHYVNTTVGYADDQKLFGWNAIDFSSGWPLV

>5813\_t gene=5813\_g

MHTYRKDTSLQAVAAVTVSGWMISRCVASIENPGLLPTPPMGFNDWSRFQCDINETI  
FTQTADSMVSTGLHAAGYNRINLDDCWMA DSRTEHKLTWNTTTFPHGLPWLGQYLK  
ERGFYFGIYEDAGNVTCGGGPGSYNYEAIDAETFASWGIDYLVKVDGCNVSPATEAEYQK  
RYSTWHEVFTNMSAPLIFSQSAPAYFSKWITGSDNLTWYTTMDYMPYNGELARHSSDI  
IVYALNATSWDGVTS PWGSIMQNYNYEILLARYQVPGYYNDPDFLIADHPGLSLDEKKS  
QFALWSSFSAPLIISAWIPELPELVLSYLNADLIAVDQDKLAQQATLVSRDGTDFDVFTKS  
LDNGDRLLTVLNLGNDTASTAISVPRGLVEEVLGIKVEYTA KDLWTGKTFVFRDSLEIK  
DLATHATAVYRISLSTVLADLVPTGLIFNDASSNCLTAKSSNGKTGQIAFN TCSGTDEQ  
VWQIRPLVGTISPLSDTSLCLTASGKQAEKPCALIPVDLAQQWDYSVHGYLTNRLNKQ  
CVTESTQSTLSACQYEIDSQVWALPVGKVNW

>5815\_t gene=5815\_g

MADSMDEQIGSLLSMGFEGTTITPHVRS LIEDYRVGAICLQAKNLKSAPQAI EADIFNGK  
KLIDSLQKVAYDAGYPELLISLDHENGGVNSIFDPDYIHQFPSAMGLAACRSRELTRSV  
CRAAAKELACIGVNWL VGPVFDVHSDTKPQPMGVRFCGEYPEIVAEQALESMLGYQEG  
GLLTCIKHFPGFNLDFV GSPADIPNVSGTFDQLLSTSLVPFQTAIDNGADSILVGACGMP  
DVNDAQIPYSCLSHAVVTGLRRRMGFGGVILSDCLEIEALYEGVGV SQAAAMAINAGC  
DVIMLCQSHSNQIEAIQGIKTAIGSGLLSKGHVQAAAGRVR RMKQKLSWDNVWNLGG  
LSALDMMKPAHKLLSRSAYDASITLVRDLGHCIP LAKNSAPTDVLLLLTPLVEPFAKSEE

ESQQASSTSPTSPSKLVNIARHLNHRQKGYLEGESTFQELGVALAKRWRGKVVHTSYTA  
SGISPLHERLVSEASAVVLLTADGVRNVYQYGFTKYIVSLCQGSQNSPAASSTIGSPDKP  
CIVVAVSSPYDFMNDRQVTTYLCTYDLTSPPLKTLVRVLFGLKATGLPPTARQTTPRSK  
VQRQLWLVEKFDERDAFSLQEMFDQVRMAVSNTFSDPEAQPSYCFETSHYQNNYQP  
LFEAEHFIVRNSSTQKVYGFCAITYNQHLRGIIAAIVVSTSHRGKGIGFSLHQYAMHSLE  
QRRGIEVVQFGSEIPVIFPGIPNRLSTHQLGLRSWVRNRGWDVGNWNHHEFYAIHLVND  
WHPISTPEKIAIDNGFLYDTVQTDHEELNQHLLIQTCFGAGNSLLRHPVVLSELYRCAQ  
ADTQGCKILLARAKNVGNSRSSGKGIISIVLYHASSQMSKYFPVEDRKTGGLVGVVS  
SRGAQAVSIVEGLILKSLILIDMGFNSVQTFIVGDPVYPQLVNLGFQKVSEFLSISKKAIQ  
QASRHLSTGRE

>5851\_t gene=5851\_g

MVASTMTPAIVAAIALSVLPGADAAALQHKSALTRRDCPDYTDYSQSPHAPYSDGPLHL  
PFQRPTTEECRTFVSESVKINDVTSRLVDPDLAMLFTNALPNTLDTTVAWHVNASSDS  
VQKRASNATWPGAQSFITGDIDAEWLRDSVNQVMNYQTLAKSDAALYQLILGAINQTS  
EFIINYPFCGAFQPPSPGLAPTNTEIDTVTPDYDRTFVYECKYELDSLAAFLSLGNQFY  
NATGSTEYLSDRWYTALNTVLQTLDEEAQPTFDSKGFVTNVYTWQRQTTLGTETLSL  
NGEGNPLNRNIGLIRSAFRPSDDATIFGYFVPANAMMSVQLGRTADTLEAVGGNKTLIQ  
DLRTRSTNLRKAVLDQGVFEHPTYGKVFVFEVDGYGGRNVMDANIPSLALPYLGFV  
DVDDQTYQNTRKMVLSADGNPYLSSGSAFHGIGGPHAGLTTAWPMSLLVQAQTTDND  
TEIMECINLVVNSSLGLIHESINVNITDYTRPWFAWANSLFSQTILKLAEEKPHLIFNDS  
IPYIVPT

>5858\_t gene=5858\_g

MPDFYPSLAQTALVAAAFKVLFPAYKSTDFEVHRNWLATTHSLPVQDWYYEKTSEWT  
LDYPPFFAAFEWSLSQIAKYADPAMLVNNLNYSWQTIYFQRATVIVTELVLAFALNQ  
YVKSVPSSSKHLAHIASLSILLSPGLLIIDHIHFQYNGFLYGILILSMVWARKQSTMLYSAI  
AFAALLCLKHIYLYLSLAWFVYLLRVYCLEPKSVLPPRFGNIIKLGIAIIAVFGLALGPFAY  
WDQLFQLKDRFLPFSRGLTHAYWAPNIWALYAFADRLLIPLAPRLGLPVDYEAVRSVTR  
GLVGDTSFAVLPEVTKEQTFALTFIFQLLCLVKLWLRPTWDTFVGAVTLCGYASFLFGW  
HVHEKAVLLIIIPFSLIALKDRRYLGAFRPLAVAGHVSLFPLLFTATEFPIKTAYTIFWLILF  
LFVFDREVAPVPERPRVFLFDRFSFLYITVSIPLILYCSLFHQIVFGLNRYEFVPLMFMSAYS  
AVGIVGSWLGFMVVYFVS

>5867\_t gene=5867\_g

MATKSSPVVDQPLSETVIEQSLFQQAQSAAAAQRRTRQEEAPLAKIDLVPDPAEDEIPPP  
AYGDIYGEINNEENGLGTSARVTDDGRVNIRINQVNRRLSQIFTPALRQQVESVQDSHPP  
SSPYIPSSLGGRKGVPPPALNIVIQVVGSRGDVQPFVALGKVLKNTYGHRVRLATHPNF  
KDFVQENGLEFFSIGGDPARLMAFMAKNPSLLPGFRSLVSGDINQRRKDVAEYIQGCWR  
SCYKAGDGMTFRATDDDLARSFPVADCIANPPSFAHVHCAEKLGIPLHIMFTMPYSPTQ  
AFPHPLANIQSSNADPQLTNYISYVMIEVLQWQGLGDIINRFRAKCLGLDPVSLIWGPGM  
LHRLKVPHTYCWSPALIPKPKDWGPHISVSGYYSLELASDYNPPRDLQAFLDAGPLPIYI  
GYGSIVLEDPNAMMELILEAVRKTGQRAVLSKGWGGMDTDRDSIPDGIFILGNVPHDWL  
FKHVSCVVHHGGAGTTAAGIAAGRPTVIVPFFGDQLFWGAMVARAGAGPHPIPYKQLT  
VDKLVDAISFCLKPESLERAKELSSEIAMEQGNMGAAQLLHQYLEADRLRCMLAPSRPA  
TWRIKRTQVRLSFAACTLANAKILNFHDLKLFQYETDEGPWDPISGGAAACFRAFS  
GMAMGVAEFPSETLKPLRIPAGSRRQSSESVPPIARRSKTSLVNERSTLAGQSSSLIAQES

LSRVGSLPSLSSSTSNVESSYISDVLDGQSNLKQDDDGRRRVRSRNESEDFGKERDMLRQT  
GVHTSKGLGRIVKSAKIPMEISVGLTKGFHNFPKLWGDDTVRPQEKVSDFKSGVMAV  
GKEFGYGWYDGVLTGLVTQPWKGAQKEGPGGFLKGIGKGLGGFVTKPTAGFAGVLGHT  
MKGVHKEMQKVFGSNVQGYIVASRVAQGYEEWLQSSDTEKQDVIDRWKIVQKYLKER  
NPDESMLDVLRAQQQENTENAGVTSVGMTAPNLDPESVVSHLDELRESAGDSEIVEMSI  
QGTSLRDTGEGTGTEWGNKEDESQRRRQDAADDEAELESLRQAIAASETEAQQQASEA  
LEFERQLERVMAESLREQRQRHSSSSSSVWESDTSSDEDDDDENERESAEMAEMAAGSL  
SQPPSYDPGHSQSGFEGQRGEKTAQERTEEEIVLEYVKKQSLLEAHHQSKGKGRATAE  
EDEDDEDLQRALKLSMQDVNSRRT

>5876\_t gene=5876\_g

MTTILTNHFFTGKGTELADEASFAECLVIQDDTIVHVGSSSTDEVVSQAQQNGAVIEDLK  
KRYILPGFIDGHMHLGQALQKLDLDGCKDLSEIRERISVYAKQNPQVPRILCKGWM  
QSMTDNEALASMLDDLDPRPIFIDAKDLHSTWCNTAALQELKVDDEMADPEGGTIHRDES  
GRPSGLLSEAVVFAVIWPHLARAASMEEKLDALKGAISVYTASGYTGLVDMAMMENT  
WEALLVLRQQQPNGKLNLRIAAHWLIVPSADSEADLKQVDRATELHAKYNLESSPDFRI  
AGIKVICDGVVDGCTAALLEPYTLNGVSCDPLWPQERLAPVVSRAVKAGLQCALHAIGD  
KTVHMLNVLEAHGTRDGRHRIEHLEMTTAEDAARLGKLGVTASVQPVHSDPDILRAW  
PSLIGHDRCRRAFAAYRDFVDGGAPIAFGSDSPTAPFEPLPNVYTATRRSARLPESEETVN  
PHFALPLVTAFTAATTGAAACFADKITGKLEKGLKADFVIVDMEWSKDKLLQATVDE  
TWFGGEKVFSVQR

>5905\_t gene=5905\_g

MSKTSIATAATTATSIPGARQRKPSIPVIAVSTEESTSTKKPFNESDVLIVGAGVAGCALA  
VALGKQGRKVTLLERSLKEPDRIVGELLQPGGVQALEQLGLLDCLEGIDAIVDGYDVIF  
HGTEVEIPYPADKTTGVIPQGRSFHHGRFIMKLREAARTTPNVTIVEATATNLIKSHSDVI  
GVEGTVDGNSDHFIAPLTIVADGYASKFRKDYHTHTPEVKSFKCGLELIDAEPLMPLHGH  
VFIGNGPPVLMYQIGTHESTRALIDIPDNLPSASVENGGVKGHMKNVVLPSLPKAVQPSFL  
AAVEQGRIRSMPSNPLSTTNKTRGLIIGDASNMRHPLTGGGMTVALNDVVLRDLLSP  
EKVPTFKDTPVTKMKTFFHWQRKKTASTINILAQALYSLFAANDPYLRILQRGCFRYFE  
MGMIEAPCGMLAGLIKQPTVLIRHFFAVALLSIWINFTETPFYLPYAFYQGC AVLWTA  
CEVIMPYVFAELKR

>5964\_t gene=5964\_g

MTSKHSFERAGILALGLVATSSFVAAGPCDIYSSGGTGPCVAAHSTTRALYDAYSGPLYQV  
TRSSDSSKTDISPLAAGGVANSAAQDSFCSGTTCLISIIYDQSGKGNHLTQAPKGGWSGP  
GPNGSDNLATATSAPIYLNQKAYGVFIAPGDGYRNDKTTGIATGDEAEGIYAIFDGTHY  
NGCCCFDYGNAETSGTDTGAGHMEAIYFGDCNVWGTGSGSGPWIMADLENGLFSGYN  
AKQNTNDASISWRFVTA VVKGEPNNWAIRGGNAQSGSLSTYYSGIRPSGYNPMHKEGAI  
ILGTGGDNSNGAQGTFYEGVITSGYPSDSTENSVQANIVAAGYSTSPGSHTTSTLTTTT  
ITSVSGAGQTHWGQCGSGSGPTSCVAPYACTTANPYAACL

>5966\_t gene=5966\_g

MASLSTIAMITLLVPLVTFFLIPTAVGYILKLALRSLGWSLKNKTNARRELILSQVRIIEEH  
YLETAKLAASSAGPEDDDWEKVDGTVPGVAGNGKPIGEDWEGHIGFFHPCNAGGGGE  
RVLWAAVKATQERWPKAVCAIYTG DHEVTKAAMLERVETRFNIK LHAPT VVLLYLSTR  
KYVQSSMYPHFTLLGQSLGSLVVAFDANLLVPDIFIDTIGYAF TIALSKYLFPSVPTGAY  
VHYPTISTDMLTSLDDNTGIKGLNSGAGTGWKGM AKKQYWR LFARLYGWVGSKVDV

VMTNSSWTSAHINSLWGPARRNKKLAYKDASVVPPTAVSDIKSAIDVNDSTEASREPSI  
LYIAQFRPEKNHALILRAFARFIQNRKSPSSATEPKLILIGSVRHSSPDETHIYHLRLLAHE  
LQIRDQTTFCIDASWPTILSHLRTSSIGTNAMWNEHFHIGVVEYQAAGLISVVHDSGGPRE  
DIVINLDGKGETGFRASTEFAAGFEDALSLPAAEKVRMRLRARESAMRFTEEFARK  
WIAEVGKLVDLRRRK

>6003\_t gene=6003\_g

MPQREFVPKKYELSKDGNKSTLALRSVGGKQSFDFTEAVRPNLFRVRFTSDAHPLPPYP  
SVPEPTKDDSLSSFTTNDASAATEIGGVTATVEWKSTPVVSLFSFGSKQPLHRDLPGRSY  
VADSSGVSHYSVLDREALHVGLGEKPAPMDLTNRNFILSASDTFGYDVYRTDPLYKHIP  
LLIKASSEGVVAIFSSYSRGTWSVGSSELDGLYGAYKVYRQDYGGLEEFIVGKTLKDV  
VRTYAELAGFLLPPRWAYGYISGGYKYTMLNNQALLDFAAKLKHHDIPCS AHQMSSG  
YSFSDSEPSLRTVFTWHPGRFPDPKKWTSQMHAAGLRLLSNIKPFVLSHPDFPKLKAAN  
ALFTDPDTQLPGYMDVWSAGGGEGAEGCHIDFSSHDFKWWFEGVQKLANAGIDGIW  
NDNNEYTLPNDDWTLKLDNKDVKIGHRADAPNSVGLWGRNMHTELMGKASHDALVN  
LRPNTRPFVLR SATAGTLRYAASSWSGDDVTSWENLKGANALSLNAGFSLHHCYGHDI  
GGFEGPQPPELLLRVWQIGIYSPRFAINCFKTPADNLLGDVIEPWMYPEITPLIRDITKR  
RYEILPYIYSLAESHLYASPPQRWIGWGYESDPEVWTSKKLKEGEEQFWFGDSLLVGG  
VYEPGVTS AKVYLPRKSDGRFDYGYVNLNAPYEY LASGWTTIASEWQNSIPLLARIGG  
AVPVGKSVVTRTPGEENSDDAAAGISELDDYRGIEIFPPQASSHGIFSTTWLEDDGYTQ  
NAGVSSFTVNYSSSTVEKVTVAFERGDGNKYVPAWKS LDVVLPVGD ERHVVSSQSGQPL  
EYVGV DARGRRVYRLSDI

>6004\_t gene=6004\_g

MASRFLAIGQVSLDVA AFQVATLNIAGDMMTVLDHIHLLRQTL SHGSDILDNPQDSEFQ  
ELLARWTDIDRKEPAAIILPSENDCLKAVQWALQSSIPFVARSGGHSEWSTIGKDGVIID  
LSRFSGV EVDAAEAKTAVLRGSILSKQVAVSLAEAGFFTALGNGNTVGAIPYMLGGGVAI  
TTSTTFGFS DQILAARIITANGELLTVDENNHDPDLLYAIRGAGQFFGLVTELTIKALPLSLL  
GNDAGVIWVGGFVFPINRAEEVATVMKGLMDDRYATAGLMMIMAPPPDQRPSLVIAA  
RYEGNPDDAEKAYAPLYKLNPIIANGGPVPIQNTSDSRAAIGAKGDFKRFVGLHGFN  
VSSFLETVELYKELIAECPDAINTAFNFQWWSTPPRKPDEFESAMSLHDIRYWQNNLIWHT  
DARNRAKVDEYNDRCIAIMRGNPTEL VNYQNGTRDGPICYRYRGIERLTRLRQLKKH  
WDPSGVFTRQLLD

>6054\_t gene=6054\_g

MDFSRYGTASEEWLEFVSRNPQASQDGYNDNDLQLASQLRESANKAREATSQRLLSQH  
DLHKKVDITLSVPSRGSISPLRRYSPPSYNQNGENLARCLVYFHGGGFLFGSETTDDY  
LCATMADSLKIVIISVIYRHTPDWPHSQNQDAEDAMLYIENSATNLGIDITSGVGLGIS  
AGAGLAAAMAIRDRNHLRLISSVTL SIPWLIHVDNYPFEAFLSPEKSSKIQRDAPVIPWA  
RLKMFSDLVDGGKNSV NKDSSLNAALRADEELRDWPKTAILVAGMDPLRDDGLLLA  
TRLKALK

>6128\_t gene=6128\_g

MLLPKGGVNWKSARSRLPPWRAVLILLTRTRFLVSI AVTGLVLLWRGISSAAEMQSF  
YCYGPSKSPMHMTINEMNEWNAHLQTPVNFNHHPEYDVNSTSINFVNLNPIKSTPKAAA  
NGERV LILTPLRDAAPYLPKYFDLLSILTYPHELIDLAFVGDSTDDTLAVLSSELDRIQSQ  
VEQKVAFRSATIIQKDFGSDIDMNVKEKHSFEAQGPRRKS IARARNFLLYSALKPDHSWV  
YWRDVIDVDSPEKILEDMAHDKDILVPNIWFHRYENGH DIEGKFDYNSWIESDKGRRL

ADSLPKDTILAEGYKQYDTGRTYLVKLGDRNNKDEEVELDGVGGVNILVKADVHRA  
GINFPSYAFENQAETEGFAKMAKRAGYQVVGLPNYIVWHIDTEEKPGNLGGRKAY

>6133\_t gene=6133\_g

MFPRIKPERTSLFALGLIASSSLVAATGPCDIYSSGGTPCVAHSTTRALYASYSGALYQI  
KRGSDNTTTTISPLSAGGVANAAAQDTFCADTTCLITIIYDQSGRGNHLTQAPPGGFDGP  
DVNGYDNLAAAVGAPVTLNGKKA YGVFISPGTYRNNAAASGTATGDAAEGMYAVLD  
GTHYNGACCFDYGNAETSSTDTGNHMEAIYYGDATYWGSGSGSGPWIMADLENGLF  
SGESTGENSADPSLSYRFVTA VVKGEPNFWAIRGGNAASGSLSTYYSGVRPNVSGYYP  
HKEGAIILGIGGDN SNGAQGTFYEGVMTSGYPTDATENSVQANIVAAGYATTSLSGTA  
LTVGSAISLHVTTAGYTTRYIAHTDTTNTQVSSSSSTTLKEQASWTVRTGLGNSACFS  
FESVDTPGSYIRHYNFELLNANDGTKQFYEDATFCPESGLSGTGTSLRSWSYPTRYFRH  
YNNVLYAASNGGVQTFDATASFNADVTFLEVETAFA

>6260\_t gene=6260\_g

MSRSKEGFLWPTQETEGLLSDAVQQGSRSIQDFYDVVVIGAGFTGLIAARDLTQKHGL  
RVLLVDARDRIGGRTWTAKVQGEEIEMGGTWVHWNQPHLYAELHRYGLHRNLKTSAG  
TSAAEMQYFRPASGQLEAVPTEKYVA VLENVAQRFFSIDGLESKSLMPYPHDLRQSP  
WQAYDHLSVKNRLDQLHDIPHWEKDLFEANINTFGSAPGKDIFVEALRWFTLGGHSM  
VGVFELASIFKLGNGMASFARAIWNEFN GDSLFPINGIRQGAGGVEINTS QSQTIRAK  
LVISTIPLNCLNDIQFSPPLSPIRQAAIAEGHINRGAKIHFKLRETLPGWFWTSNGYNGSNF  
VFAFSDHNGTQPSGPGTWCIGFGYNGCLTDK KDSRSILKAFKQDINPNHNVEVYATHD  
WMNDPYAKGVWACWGPNSTSKYLKALQEPHGRIVFASADWAAGWRGFIDGAIEQ GK  
VAVHHIHELLKNDLSAASAKL

>6326\_t gene=6326\_g

MPQNDTATTLNIALQNQTSSNVNAYITGQAIDNNNALFLLQSDGKTAYYPTSPSSTSA  
LGANCAIPLGAPGNTVTVTIPHLAGARLWFVQDDTLTFYLNPGPALVEPSSSNTADVNY  
NKYWDFCEFTYNSTQLYVNISYVDFVSLPISLTLTNTSNQTQHVS GMASNGLDTICSGLN  
AQQSKDSAGWNQLIIQKNGANLRANSPNTGISLNNSLFSGYYQPYVDQVWSQYTNSTLT  
INTQIAAGNVTGQVSNDFNFGNGAATYTKPAAADIFSCSSGPFAPTGNQEKDDITARLT  
AAFNRSTLLIDGNTPESDDPTEYYQNAITNHYARIVHAANLDGRGYTFPYDDVAPTNGA  
DQSGSIHDPNPQLLTVAVGGGNASTSAAINNPSTATPQTGKNNQQSANGKKNRSGGNS  
KQNVFLGLIQLPCF

>6328\_t gene=6328\_g

MAPSSSYISSQLRQLIYYHLDNNLVKNALFLAGRLHAYESRSSEASYLLALCHLLSGQSK  
AAWEYSKVAGSRGTHLGCSYVHAQA CLDLGKYREGISALDRSRYLWGAKSNWNKHSE  
TRRQHTPDAAAVLCLQGKLWQAQKDLKQAVECYAEALKLNPFMWDAFLGLCETGVNI  
QVPNIYRLSPELVAILQAAPQDLSALSDITMSANGPLQTQSNSTSNSDPFASTSKGDPVS  
STGSSALWEKLN GSSVSVASVGTTHIHEIPEYENETEDTRNARGDWD PPLAPNRRNRHIIQQ  
VEYGDPPP KMRATALKSRI RSRAESEDQNVMPMDEVSTSVAPAGERKRTVSGQVAHPP  
QAAEPGAPQRRSTRLLNHIRPTSSRLATATLGREGREVRKVRATGTRGRAPPATNVGRV  
VSGNRKVLGNGSDPDGKDSRTSATSSNGGSSHQSKSAVADRSKEMEALSWLMDLFSKL  
ATAHYNLTRYKCQEA VQAFNLLSQAQRETPWVLSQLGRAYYEQALYADA EKYFVRVK  
ALAPARLEDMEIYSTVLWHLKNDVELAYLAHELVEVDRLSPEAWCAVGNSFSHQ RDHD  
QALKCFKRATQLDPRFAYAYALQGHEHVANEEFDKALDAFRKGISVDSRHYNSWYGLG  
QVYEKMGKLEFAEQHYRNAVQINPNNAV LICCMGLVVEKLNPNQSALFHYSRATSIAPK

SVLARFRKARVLLKLNEYKLSLAELKVLKDMAPDEANVHYLLGKVYKQLRDKANAIAIK  
HFTTALNLDPKAAQYIKDAMETLDDDEDDDDADMA

>6354\_t gene=6354\_g

MSTDPSAIMSSYPSQDGRIKYDQFFIFGDSITQLSYDQRLGFGFGAALES DYARRLDVV  
NRGFSGYTTANAKVLFPKIFPTLQEGRVRLMTIFFGANDAVLPPYAQQVSLDQYKENLK  
FLIHHSIKEHGTKIIVLTPPPINEHQLKFFDAEKGFETPSRTAANTKRYADACRDVAQSL  
GVPVADIWTAIHKSTGWEDGQPLTGSKDVPANEQLASMLTDGLHFTGKGYKLMYDEV  
MTIRATWPEEAPENLREVFPPWDIAPK

>6407\_t gene=6407\_g

MAGVTQPPYPLHPSIASRIHPEYAAFYNEYIINQQQVHLQPVAASRTSGVLIPGGGPVLPV  
GKTEDITIKRVETEGPDVLRVFTPETPAPEGGYGITLYMHGGGWVLGNINTENTVCTNI  
CKRAGVVVVSVDYRFVLPPI SAFSTIYSNAKMLTRLAPENPFPAAVHDCWEALLWLHTP  
STISHLNINTTSKLSVGGSSAGGNLAAVLTHKALLERPGQINIVAQALSVPVTDNTATPQN  
NWA WKEFEFTAALPALKMMWYRKHYLPDEKEWSNPEASPLYGNEDGHWAKLPPAV  
VVVGELDVL RGEGEAYAKKLQENGVRAEVHVMKGMPPHFLAMDAVLEAGREAITLLV  
EAVKSSL

>6426\_t gene=6426\_g

MSKFLSWSVLLQGVSYTLAAPQQGKCLPAVNVGYAANITFVGCYTDNSTRILQGGSTVP  
PNGNDPQSCADSCGASGFTYAGVEYGSQCYCGSTILSGAQQQADSACTMTCSGNSSEIC  
GGTWLVDIYQISNPSSTPVPLSGAVKPNCTADPLCSNPVCNAALDPLTRAKGLVDALTFD  
EKIQTQNGSPGSARLGLPGYQWWSEALHGVASSPGVTFQTGNFSYATSFPQPILMSAA  
FDDALIQQVGT VVSIEGRAFSNYGNAGLDFWTPNINPFRDPRWGRGQETPGEDPFHIARY  
VYNLVDGLQNGIGPTNPRVVATCKHFAGYDIEDWEGNARYGFNAIISTQDLSEYYLPPF  
KSCARDAKVDAIMCSYNAVNGIPTCADSYLLDITLRDHWNWNQTGRWVTSDCDAIGNI  
FTDHHYTSTAAAAAADALNAGTNLDCGTTMSNNLAAASAQDLFQ NATLDTALTYLYSS  
LVRLGW FDEETSPYRSLDWSDVGTPASQQLAIRAAVEGIVLLKNDKTKVLP LSSHRQTIA  
LIGPYANATTQLQGN YAGVAEYIRTLVWGAEQAGYNVEYALGTDINSTDTSGFSAAVA  
AANASDIIYAGGIDNSIEAEAMDRDTISWPGNQLQLVDELSQVGKPLIVLQFGGQLDD  
SALLENEKVNAILWAGYPSQAGGQAVFDILTGKSAPAGRLPITQYPANYTNEIPMTDMA  
LRPNGTNPGR TYRWYDDAVIPFGYGLHYTSFDVSWASKKLG PYNTASLGHVSKSQYPD  
TAAFDTFHIDVKNTGKVTSDYVALLFASTKNAGPAPYPIKTLVGYARAPSIKPGETRSVS  
LDVTLGAIARTAENGDLVLYPGTYTLEVDVGQHYPTAEFQVNGPDKVLD SFPQPPSS

>6427\_t gene=6427\_g

MRTNMIAQFWALF SCLQLSHATTFQNPVIFNDLADIDVFRVNDTFYYSASSMHFSPGAPI  
LTSKDLVNWEYVGH SVPSLDFNSPAYNLEDGLRAYARGVWASTLRYRSSRNQWYWIG  
CVDFNATYIYTSSAATGPWDKASVLDNCLYDCGLLIDDDSLYVTHGSTQLSVTQLSS  
DGLSAAKTQVVYNASEYVEGSRMYKRNGIYYIICTQPDIGEYVLKSSNGPWGPYDFGVI  
LNSTSSPSAL TGGDTPHQGGIVDTPDGDWYLLAFVDVKGDSTGRVPV LSSLSWNNNDNW  
PVLTLDSGNVWPQSLSYPVESGLQTPNTDASLTGVDSFQSGTLGPQWEWNHNPDL SHVS  
VSQNGVQLSTATVTKLDDIYQARNTLRRILGPASQATIHLDVSKMQDGD RAGLALFRD  
SSAWIGIQQTGSTRNLVMRDNMILNQTNSWATESYGTNVASINFNQNP SNLYLRVYGDF  
SASGSGQA HFSYSFDGKNFTTFGSTFTLATDWEFFQAYRFAIFNYATKALGGSVLLKSFD  
LESVVL

>6429\_t gene=6429\_g



MKNTFSTLCALGALHVSSVTATTIYLAGDSTMAPGGGGSGTDGWGQYIASYLTLNVSN  
QAVAGRSARSYTREGRFNITASELKSGDFVVEFGHNDGGSLTPTDNGRTDCPNGTETC  
STVYDQVAETVLTFFPAYLEKAATTFKAKGAHVIIASQTPDNPWETGAFVYSPNRFWGYA  
ELAAEVSGVNYVDHGGYVASIFKTLGETTVDSYYPIDHTHTSVAGAKVVAQAFKGVV  
CNNLDLKSYLTTTSFEGVCL

>6468\_t gene=6468\_g

MANEQGAPDNIPPNPVVIIGPGLSALGEEAYLEASAATPAVVSAATAANNADGAVNP  
REPQDESAASYFAEVPGTATALKDAYAKSPMSPADAASGATSGPELLRRLSLIGGAHL  
TPATPVTDPRADHPGLQLTGRIISASLCIPYKVAHQAGQDWELSPRAGTSALFDSFAHLA  
SDQSPWNHTLVAWTGEVDEIVTKRAPLQPVSAANGVNAVTTAPPPVNKASAPIVDLSTS  
QAQTSLEGILVSTADRERLERQLKSSKYGKILPIWATAESDEPSDDILLQDQSRWRYAE  
RELYPLLHYKQNGPSDGRSERKWWTDYMRLNRLFADRIAKTYQAGDIVWIHDYHLFLL  
PNLLRQRIPNIFIGFLLHSPFSPSEYMRCLAKRKEVLTGVLGANMIGFQTYSYSRHFSSCCT  
RVLGFESNSAGVDAYGAHVAVDVVFATGIDAENVQKAAFGSSDIERVVANIKKLYAGKKI  
IVGRDRLDSVRGVAQKLQAFEAFLEKYPHWRDQVVLIVQVTSPTSMEEQKEDPENKIGSQ  
VSSLVSTINGRFGSLSFQVYYPQYISQLEYFSLLRVADVGLITSVRDGMNTTSLEYVLC  
QQGNHGPLILSEFSGTAAML TSAIHINPWDTTGVAAAIDQALSMSKDEKLQRHEVAYKH  
VTSNTVSMWSQHYNRLTLNLSSFDQSIATPALDRALVLKQYRKAKKRLFMFDYDGTLT  
PIVKDPQAAIPSDRVLNRNIKSLAADPRNAVWIISGRDQAFLEWGMGHIPELGLSGEHGCFI  
RKPKSDDWENLAAQFDMAWQKDVMDVDFQHYTERTQGSFIERKRVALTWHYRRADPE  
YGLFQSKECRKHLENTVMKKYDVEVMAGKANLEVRPTFVNKGFIIVTRLLNEYGRGPGE  
APEFIFCSGDDFTDEDMFRSLRHSIDLPEHIFSVTVGASSKQTLASWHLLEPADVIATIGM  
LNGTSLGAEYS

>6498\_t gene=6498\_g

MRLPTKEFAVLLACAGVGSLLQAEIPADLPVASLISSAKSHLATGSPRDALAYFDAAVAR  
DPTNYLTIFQRGATYLSLGKDTQAADDFNRVLELKPFDGALLQRSRIKRSADWAGAK  
EDLVKAGKSSPEYVELDEAQAQSAEKAAEQAEKGDWETCVSQSSVAIMKASVALNLR  
LRSHCRFEKGDIEALGDLAHILQISPGSVEPHLQISSTLFYALGDHERAIAQIRKCLHSDP  
DSKSCSRLFRKEKQYVKALNQLQEFKEKRKFTNAINLLVGTKDESGMIDDVKEDVKEAR  
ESGYIHRNAPDELYTSLIETTCEVYRAMNSKKAKTYCADILKLPKPHSLHGLLHQAQTFID  
EDEFDRAINTLTIAKEHHQSSREVQELLQKAQVLLKRSKQKDYKVLGVSRDADDRTIK  
RAYRQLTKLHHPDKAMSQGVTKEDAEEKMASINEAYEVLSDPELRRARFDNGDDPNDPE  
SGRGGPFQGHFAGGRGGGGGQQFFFQGGGGGGAQKFNFGFPGGGGPF

>6543\_t gene=6543\_g

MAPIRVGLIGLSSSKPDSMTIGAWAHLAHLPYLLSSPDYEIVALANSSQEAAEKAVKVYN  
LPATTKAYGSPEEIASDPDVLIVISVMVMKHYQLAKPALLAKKNVFEVWPLGASLAES  
EELAALAKENGVRTIVGLQARADPLVDKLELLESGQIGEIMSSSVLGPMSGLPTDSWFD  
GGEYYLDMKNGGNHFMIFFGHFFDSFTQVLGEFVEPHSILKAARTKIAIRGSDGSIKIPEY  
PKNTPDHILVQGVLKDSGAVASICSRDLMHTVDGIGLRWLITGTKGEIEVTAPEGQWQM  
SDPGRKRLKIGKNEAVEVPYANNADKSYLERLSINVTGLYEAFKDDQSHYATFDSAL  
RTHVLLDEILKRSFAA

>6560\_t gene=6560\_g

MRYFVNLAGLAFFSSAALAAPAPASLENRAASCTFSGSNGAALASKSKTSCSTIVLSSVA  
VPAGTTLDLTGLNTGTHVIFEGITTFGYEQWTGPLISISGTDITVEGASGAVLDGSGKQW

WDGKGSNISNGGKIKPKFFFAHNLKSSSISNLKIVNSPVQVFSIDSSDTLTDHITIDNSAG  
DTEGAHNTGAFDVGDSNGITISNAIVYNQDDCLAVNSGTNIIFTGGTCSGGHGLSIGSVG  
GRSNDVNTVHIEDSIIQNSQNGVRIKTVSKAQGSVAGVIYKNITLSGITDYGIIIEQDYEN  
GHPTGIPTNGVPITGLTIDGVQGSVSSSADEVYILCGDGSNSNWTWEGVDITGGKKTNSC  
KNVPTGASC

>6562\_t gene=6562\_g

MPSVETVSHHEGGIRNEGLQESTDSGRKLPHSVTHGMAPASSSWLPLGMKETIHQWWH  
KAPAAVAEHKVLSTIPYLQEAPTQRQTGNTASAPNSPSATDSLQALDPSQIGDETVNSNN  
DPYGPRRWRSRMVELSGKNRALNEFSVERVGEETHNLVMLHGYGAGLGGFFYRNFEP  
SRAKGWHLIALDMLGMGRSTRPPFKIKASDRQEATEAENWFIDALEEWRVKSKIERFT  
LMGHSMGGYIAAAYALKYPGRNLKILVSPVGIPEDPYAVNEAMPTDSTETNTNGKAPP  
RLPRLITYLWDANVSPFSLIRWSGPFPGPLVSRWTSRRFSLPYAEASALHDYTYISIFRLR  
GSGEYALTYLLAPGAFARSPLIRRIQIGRQVIRPDSAPAALTSASDPSAVAATASQPQKEN  
GIPVVFMYGDHDMVAGGFAAKEKIEEEKRRILKDATPEEREADNGSAKVYIVKNAG  
HHLYLEGDEEFNEILKEMEDVRRREAKRQS

>6581\_t gene=6581\_g

MSSNQVPPTPTLSEKHSGPSRLYEKAQYAKSLILDIAATKEQNDRKRGVAIPAGVEINTYM  
KAIDELSEQLGKENVELNDQPLKDGWYMEHPNTHDAMHVLDEEEFVASAVVYPGSTE  
VQKIVLWANKYKIPIFISIGRNLGYGGAAPRVRGSVVIDLGRRMNKILDINPVDHTCLVE  
PGVTFYALYEEIQKRGYKHLWIDCPDLGGGSVLGNTVDRGIGYTVYGDHWACHSGLEV  
VLPTGELIRTGMGAMANSSSWQIFPYGYGPMADGLFSQSNYGIVTKLGMTLMPNPGGY  
ESYLTYFPNESDLAPLVDIIRPLRIGNILENVAQLRHVVQAIAYSKGPRSSYFQEGQMTD  
ELAREIARKELNYGDFTWLYYGMSYGPKEIRQYKLDIIHKEFSKIPGARRIDPATLPKTDY  
FWSRDRIAAGIPDLEELRWVNWYPNGGHIAFSPVSPVRGPDATELWRIARSAAEFGHDI  
FPAFCVGLREMHVIVECVFNRDDPDSRKKALACMRAMIDEAASKGYGEYRTHLVLMQD  
IAKTYDFNDHALMKFNERIKDTLDPNGILAPGKSGVWPARYRGRGWEMSGLSDRSEGD  
GVARDAATRLADIIVKVEHPERGDDTRAWGPPFAEYKDGKGPGESAYYLSVNRNKKSL  
GLSFAHPEGVEILHELAKNCDVLVENYLPGLSKKYNMDYESIRKLNPRLIYASITGYGQT  
GPYSNRPGFDVMVEAEFGLMHLTGSRDGPVVKVGVAVTDLTTGLYACNSIMAALLARA  
NTGEGQHLDVCLSDVQTATLANMAESVLISGRRDSGRWGTAHPSVVPYQGFKTADGDI  
FLGGANDRLFILCGKLGKSEWSKDPKYVTNNERVRNRKELEDLIEAETAKRTTQEWLN  
ILEGSGLPYAAVNDVLGTLNHEHTKARGMVQEIHPSCGPIKVLSPVVKYSNADPSIRSPP  
PLLGEHTDEVLESVVGLSREKIQSLKSKGVVA

>6592\_t gene=6592\_g

MSRYLLAISNTILIWTLNFQGIHCLPQLPSRTAYSLPQTSRSVIQSPASLVTYYPPTARLL  
NIQTQGTYSQLETEGHPSLQFPYPSISIDPIEELGDFPDSRPFTPFATASAAVTVTVTVT  
STVYQSSTSRHSSSGIHRSSIAKATASLSSMEGQNIFETVSLDAVPTNIPVKEVHPVVKGI  
VNTTTPIGTNKIFYANFFLGTQATSSFTQPYSLVWSKGGGNAQSWGLAISHTDLQLVYG  
NQSNDLPGNPVEYYLNPGLQSITLSASELGPSTVLNTDRLTGFSADVLRPSDQSSNSIVF  
PVLQGMGFVTGIYTGQLPLVQSCITFRDLVCGAIGQGTYKYRVTLADGKSWLFYVTPD  
NDTGYYPAFNFDDSSSTTIQGPSGFYGTIQVAKNPAGDSGEVVYDASAGVYARSASISGA  
VSDYTGTYGLTWEKAGQNATNKPVLMFALPHHVESFDAQTRIAVQPLQLRSTTKGNMT  
AVAADQWTMVESDLPIDMEFAPWSPSLGVSGLSSDVQQTIYSASESELTTDVDSQSNL  
NSMYYSKVLKSKFATLVYTVHELANNPDLAASTLDGLKKAFTRFVNNEQQFPLVYDNT

WKGVVSSAAYATNDLGQDFGNSGYNDHHFHYGYFIHAAAIIIGALDPSWLNANKAWV  
NMLIRDAGNSVSDDPSFPFSRAFDWFHGHWSAKGLFESADGKDQESTSEDAMFAYAVK  
MWGKTIGDKSMEARGNMMLALLRRSLKNYFLMEDDNLNHPNSFIGNKVTGIVSSRTL  
EVGEANESTQLFENKAHHTTYFGTNLEFIQGIHMLPLLPSSAYTRSKTFVKQEWDMFA  
EEACTPASSVSSGGWKGVLVYANQAIIDPAKAYDFFNQPNFNMTWIDGGATRTRWYLAYA  
AGLKGGN

>6633\_t gene=6633\_g

MQLIPKEIDKLVISQLGLLAQRRLARGVRLNHAETALISSNLQELIRDGNHTVADLMSI  
GKTMLGRRHVLPVIFSLVELQVEGTFPTGTYLVTVHHPISTDDGDLEKALYGSFLPVPP  
KEAFPDPDPADYEPENQPGAVITVKNRITLSEGRKRIKLRVKSKGDRPIQIGSHYHFIETN  
PQLHFDREKAYGYRLDIAAGTSIRFEPGDTKTVTLVEIGGNKIISGGNFLASGKVDTSRVE  
EILTRLQQAGFAHEPEPTADASLIAPFSMEREAYVRMFGPTTGDLVRLGATNLWIKVEKD  
LTHYGDECTFGGGKSLREGMGQSSGKTTKECVDTVVTNALIIDWSGIYKADIGIKDGIIV  
GIGKAGNPDVMDGVHPNLVVGSSDVIAAEGKIVTAGGFDSHIIHFICPQQINEAISAGITT  
MLGGGTGPSTGSNATTCTPGPTHMRQMIQACDSLPIFNGITGKGNDSGKESIREQAIAGA  
AGMKLHEDWGSTPAADTCLVCEDEFDIQCMVHTDTLNEGSGFVEQTIQSFKNRTIHTYH  
TEGAGGGHAPDIISVVEHPNVLPSSNTPRPTLNTLDEHLDMLMVCHHLSKNIPEDVAF  
AESRIRGETIAAEDVLHDLGAISMMSSDSQAMGRGCEVILRTWNTAHKNKEQRGVLPED  
EGTGADNFRVKRYISKYTNPAIAQGMShLIGSVEVGKLADLVLTWTPDNFGTKPKLVVK  
GGMIAVAQMGDPNASIPTVEPVIMRPQFGTFVPSTSIMFVSQASISQGVVQSYNLRKRIEP  
VRNCRNVGKKDMKFNDVMPKMKVDPERYTVADGKLCTAEPATKPLTQQYFVY

>6669\_t gene=6669\_g

MPSLTQVSLFSLTISGLVQAAPAPAPTSPPNISERASSCTFSGSEGASSASKSKTSCSTIVL  
SDVAVPSGTTLDLTDLKDGTSVIFEGTTSFGYEEWDGPLISVSGTDITVTGAKGHVIDGD  
GSRWWDGKGSNGGTTKPKFFYAHDLTSSINGLSIKNSPVQTFSIDGSTDLTSDMTIDD  
SDGDDGSAANTDAFDVGESTGIIISGATVYNQDDCLAINSGTNITFTGGYCSGGHLSIGS  
VGGRDDNTVSDVTIESSTIIDSANGVRIKTVYDATGSVTGVTYKDITLSGITDYGIVIEQD  
YENGSPGTPTTGPITDLTIDNVKGTVESDATDIYILCGDGCSDWTWTDVSVTGGKSS  
DACKNIPDDISC

>6702\_t gene=6702\_g

MSLVLQAYTFAQQYVASVLHPTPSKSPMGLKLGVISTAQINSAIIHPAETHPDVILHGIA  
SRNLESARQAAQKYHFKKAYGSYQELLDDSDIDIVYISTPNGLHFEWASKALRAGKHVL  
CEKPFTSNAEEARKLIELAKEKGLVCEEAFHWQFHAAHLFREILDGQYGRVLRNAV  
MTASPGVPHGDISFELSGGSLMDMTYALSFRFAVQGAKLKEIQSAVARPYSKDQRVDE  
AMHSLILFEDSRDGHLIQSRVYTDMARQWAIKIVPRVWELPSIEVETDKAIIFFYNAMM  
PHLYHYISITDKSTGKTQYKKQYKGGPCWGESWTTGGKGGKSYWSTYRYQLEAFTEKV  
RGKHVPFWIPGEESVLQMETIDAIYKAAGLPARPSVSKPKV

>6719\_t gene=6719\_g

MITRDSIPLKCEVIIPSPETPVRFLDRWSDVGLNLPALVVVPDTEQDIIDTHIYAKDTGLEL  
IPGGGGHGFVFSITEKTLYLDLKRFDKVVLDTSQEQTKISFGGGTLTRQIIDACTSKGFYT  
TWTNSYGVGMVGSVLGGGSQPLNGLHGMIMDQIISIRLITAAGEVLELDSSEGEELALF  
HALCGAGHGLGVVTSMNLKAFPLAALRMKNDEVWCRRVTFPADAIDLAAEKYKQLLP  
PKPAQYVLLMFAREPVTSSAPGAPIIILSSLYYGPEEEGEQASKPLFDDAIVNNITIHETVS  
TPLSQMNEAWASFSAHGEYKDISSAWLRTPVETMKASFQQYVQFTDQYKDATRSTIV

HATHNPRTHMAISETAEGQAKYFESRDRGTCMLVMPWTNNPETVEPMRAFAKRIKALY  
RKAQPDSVPRTFPNMQSDTQLEELHTVDRIKELKRIKKLWDESNVFWSPYRDKRKQ

>6722\_t gene=6722\_g

MSSLPMNTVKLLIISIRDAIDLTFVSVFVQLFAGDIFSPRLLRMVLELMLAGLLLIAPAIDT  
VQYLSSSNRTRSYPVHAPENSQEGQKYPVIMFHGGGGIGSDADGLAMQLDLRMSLPL  
IQTAYSADKYFIYPNGVGGVWAGPTYAKVPVEEDLQFVSDMIDDLKSKYSIDSNRIYGA  
GMSNGGGFVDTIACSELSSQFAAFASVAGSFYTSVGGRDCLLARSPIPFLEIHGGGLDKGV  
HYAGGMGYGGPLPIPVLWLENWAKRNKCTSNSTAHSIDGNVHHTSWTCGGQSGILQH  
WKVDANGHDWPSKSRNINMLVAGMGPQPIEANELIIEFFNQYSLN

>6727\_t gene=6727\_g

MTITSFTLWFLALATFVVSGIAQTVDPSTCASGVHLLLLRGEGTGDDLNVLDSIQSVVLE  
QIPGSTSLGLPYQHGDSDKQFAAYNGSLLLQYIAEYASSCPSSKIAILGYSLGAVATMD  
AICGVSSLLVYYYVSALDPHYAQNVIADVAYGDETYVFPQPNVGNCTIGAGIYPRLDP  
AAACEPFASSLQSYCDYGDEQCCSVFPLDDNAAHHTYFTKYNQDVVTFIQSRL

>6728\_t gene=6728\_g

MPASRPVRTAVIGLSSSAVTSWAANAHLVPLINARNRDLFQITALCNSSVDAAKSAIAQY  
QLDPSTVKAYGSPADLAADPDVELVLCNTRVDKHYETILPSIQAGKSVYIEWPIAGNLAH  
IEELVAAYRARRNQDQVAAVGLQGRFAPPVVKIKEVLQSGKVGKLVSTEVRFGGTKD  
RQNLISGLKIFTQREIGGNAITIGFGHVIDYVQSVVGDVPGTDHVHLGLQHPEVGLRDP  
QTGNIETVRSVDPDLLNLHGTLPESDYTSRKASLVAYFARGQYPGEPSTWILNCEKG  
AIRLVSPGIALHANAYESPVTISVHQYQTDKVEQIEWSWSEAQLDVPILSRVQTCLVSV  
AEKNQKGYVDLEDAAVRARQISRWLDSFSADI

>6729\_t gene=6729\_g

MFDSAFCVVLDGTVVTAADVGRYDIAIKDGKIALAPARSLSKVKATRVIDAQGAYIM  
PGGVDAHVHLSEPLFGKGRPADDFTSGRSIAIAGGTTTIIAFAPQDRSDPSILNALDEAQ  
QKARDAAYCDYSLHLLISNPTEQALEEFAVLRERGVSSIKIYMTYEVLQLRDNQILDVLL  
QARKDLITMIHAENGDMLTWMTEQLERRLLAPKYHATSRPQILESEATNRAIALSQL  
VETPILIVHVSSPLAANNIRTAQTSGLPVFAETCPQYMFLTRKALDQPGFEGAKCVCSPPP  
RDGEADLESIWKLENGTFTLSSDHCPFIFDDNVDGKKSASEDAPLGRFRYIPNGCPGV  
ETRLALVLSADRLSPQKFVEVTSTNPAKLYGLYPQKALIPGLSDADLTIWYPSALEPFP  
VTNSALHHNVDTYPYEGQIVSNWPRYTLVRGEVVWDRDNGGVVGRKGYGQFVKRGPS  
AFCREQPEWDVEKF

>6743\_t gene=6743\_g

MTLGVATTAVLTVGLLASLVSSAASQSYTWNNVKTGGGGGFTPGIVFNPSAKGVAYAR  
TDIGGPYRLNADDTWTPLLDVNNNSNWHNWGIDALATDPVDTERLYLAVGMYTNEWD  
PNPGSILRSTDMGTTWQETVLPFKVGGNMPGRGVGERLAVDPNDNSIIFGARSGLW  
KSTDYGVTSNVTAFTWTGTTFQNSSSSYTSDPVGIWVTFDSTSGTKGSPTPRIFVGVV  
DTGKSVFKSEDGGVTWAWVSGEPQYGFLPHKGILSPQEKTLIYSYNGAGPYDGTNGTV  
HKYNISTGVWTDISPTPMASYGYGGLAVDLQVPGTVMVAALNCWWPELIWRSLDS  
GATWSPIWAWNGYPNIDYYYSYDISNAPWLQDNTSTAEPVVRVGMVVEALAIIDPFDN  
HWLYGTGETIYGGHDLLKWDSSHNITLKS LAVGIEEMAVLGLIAPSGGPLLSAVGDDG  
GFYHVDLNTAPSQYFHDPTYSSSTNGIDYAGNKPSYIVRAGSSSTLPTVSLSTDYGLTWSA  
DYAASSSTVPGAVALSADGDTVLLVPTSGSPLISKYTSFSTVSGLPPSAVIASDKSNNTV  
FYGGYAGSFYTSDDGGNTFTKGPSLGSSSAVNIRAHPHPTIAGDVWASTDTGLWHSTNSG

SSFTQIGSGCTAGWSFGLGKAASTTSYPVIFGFFTVDGVTALFKTEDKGVNWQIISDAAH  
GFGASSANVVNGDMSNYGRVFGTNGRGIWYGEPSGSLPTSTASGTTTSSSTLSSSKSTST  
ILTTSSSTSVSSSSKSTSTVRTTSSSTTSASSTSRRTTSVATTTSSGASATASPYGQCQGGSGYT  
GPTVCPSGWTCTIQNAYYSQCKFYQSSAF

>6745\_t gene=6745\_g

MFCSARIVWFVALGVAQVAATALPAFNINPDSVSVSGLSSGGFMAAQLGVAYSIDIFNVG  
FGVFAGGPYDCARNQYYTFCMYNGYPSITPTANMKSWSGKQIASVANLQKQKIYLWT  
GSSDTTVGPVNMNQLKTQLTNFDNSANVSYVTTIGAVHTFPTDFNSGGDNDCGFSTSPYI  
SDCNYDGAGAALEWIYGS LNARNTGTLG SILSFDQSASYGAPGMDITGYLYVPQSCMS  
GATVCSLHVALHGCLQSYSSIGSQFIQNTGYNKWADTNNMIILYPQAIPDYTIHTIWNNG  
VLSNPNCGWDWVGWYGNNADQIGGVQMAAIVSQVEQIVSGFHG

>6751\_t gene=6751\_g

MSWILQAVALLTSLISSLQDLTNGLSSYGTLECCQLPLYLGSTPSPWGNTDPASTNVPN  
TGAVRSYTFVSRAIKAPDGYQKSVILINGQFPGLIEANWGD TIEVTVYNDIEDTAEGVT  
LHWHGQPQRLSPGEDGVPVGSQCPIPPGSSLT YRFRAEYFGTGWYHSHVSGQYTDGLYG  
PMVIYGPTQVPYDIDLGPVMLS DYSHTSYYDILKSAYLFPVPFPTIDNNLINGKGIFDCSL  
ANETICTPWAGLSKFAFQTGKVHRLRLINTGGEGSQKFSIDGHV LKVIANDYVPVEPYET  
DVVTLGIGQRTDVLVTASGAANGAYWMRS DIDEDECLNLT VNSHALAAVYYPWSSTN  
AVPKTTATTWSSNNCQNDPLNQTIPIYYPTTPPSQPATTAYVNITVGQ NATGEFIFFVNGT  
SFEVDYNAPLLPIAQSGNISQVPTVRNLYDFGTNTSVRIVLENYWPTVHPIHLHGHNFWV  
LASGFGSWDGTIVNSNPQRDTHLMMPSAPDGTPSYLVVEFNTDNPGVWPLHCHTSIH  
ASAGLLFNVLERSDLLQSQVSPSSIQENCVAWAAWTSKDFVDQIDSGL

>6756\_t gene=6756\_g

MKVYQNVQFRTL DGIYLRGRLYAAAQKGP AVILCPGYNSVVD SFPAAVPEEFQKAGITA  
LLYDPRNTGKSGGFPRNDIDPFKQVEDYSDAFCYLTTLPIVDTKAIVFWGISLSAGIALSA  
ASLDKRIVAVIAVAPVFKFLPVTEKDARRLKT KMIKDRESQLLRGNPPYVLP IAESLAEIP  
FNSHVNANRGDDEEQRKRAEEEQIRQQQERWK EEA VEANQEFDDKLIHNPYGTTIQSYH  
RMFLFESIPLSMVKGVWPTPVMFLTPEKDQISPPQH QIDVFESLRDPKRQVFAPGKEHVY  
VMEGTDVPLLVKLQVEFVWQAVRGR LKAAT

>6764\_t gene=6764\_g

MTIFTSVLQFALLLAALPFGLAVIQVRHDDSFQPDYILRISSDNMTLACRTRPSTVVNGTV  
PGPALYLKENQTTWVRVYNDLLEANTTMHWHGLSSIAPYSDGSPQASQWPIKAQHFFD  
YEIRPQIGDAGSYYYHSHVGLQATTAAGPLIVEEVDGIRPYEYDEERLMFFSELYNHTDK  
ETMEGLTAPLATYLVAGDAEALLVNGNSFPALPWNATDSPLPAANA AVSDANATCHPD  
IIHVEPNRTYRFRAFGASSLGAYVFAFEDHNNLTVISADASYTQSFDTDKILFTTGQRYDF  
LLHTKTEEELKILGKTEFWIQFELRNRPVNATYYAVLSY TSTNASTIPTTPPDQKPVQGIP  
ADLRSYMEYTLPELLPNRFPSSDQVTRQVYITQQQLTVTAGQFLALNNHTWTETNQHER  
DTPFNSTLSVYDVPYLVDIYNRGEQAIPNYENALRHGGWDPELNVYPAKLGEVIDIIIQY  
DAIGAHASNDAHPFHLHGTHYWDLGSGPGSYNATANEAKLRGYNPVL RDTTTL YRFDD  
PNNSTIQGWRAWRLKATGPGVWMLHCHILQH MVLMQAVWFAGNAVEIAHGTA PGL  
VAGYLYGGDAYGNATHDPLVTHFYE

>6771\_t gene=6771\_g

MVITNSNKQNYLTLADTLSITVESNSLITVVPGLTRLAPSQSAVVQVGVQNKPGVTPGN  
TCQATVVATYGTQYGAITNETISGPCGFGSYSASASSVDYHWNPDWFNEVKFGIFIH

WGLYSAPAYGSVAPNEDYAEWYWRRQHEPTYKTKTYQYHLQTYGENFNFDQFMSNF  
TDTNFDPAWVDLIAAAGAKYFVPVTKHHDGFALFNSTSSISQRSSIHYGPNRDLIGDLL  
AAAKQYHPEIRRGTYFSLPEWYNPAYEKYAFGDFGLPNQNPYTNAIPYTGVEVEDFV  
ADIQVPQMEQLAYTYDTEIMWCDIGGANDMVNFASAWLNWATKQGRQVTFNRCIGI  
GDFDTPEYTTNSGTVSRKWESNRGMDPFSFGYNYQTPLSSYL TGN DIIQSLVDITSKNGN  
FLLDIGPMHDGTIPQIMQTGLRNAGSWLQTHGEGYSTRYWSVTPGLNNFRYTTTQNAF  
YIFYLQAPPSQLVIPDPVPWLPGDTVTVLGGSQNGTVLSASKNTSGNLVLNLSSAIIISGDQ  
YVWGFKIAYTSTW

>6773\_t gene=6773\_g

MKPTVFIVHGGWHVPESYERLISALRADGYEVHCPRLPTTNQSRPPNADLYTDSDFVRS  
YVSSLVQAGREVVAILHSYGGQVGS DALIGL GKAIREREGLSGGVTHLIYMAAFVAEAG  
VGMMDKVREFGHMNLVPIAFDFAEDDTCLNNDPRNLLVGPSDLAEEEEVDKYLATLVR  
WNGKAMYLP IRHAAWRDIPVAYIHCTADMTVPLDYQKSFVADMEKAGRPVRI FELATG  
HSPNLTATAGVVD AINQVVNS

>6779\_t gene=6779\_g

MSQTTTIETGRSKDMDQVSD DALLHRVQQTLLLSVGH SKEQMHPDGHWC GELRTNVT  
VAEHVFLYQAL AIDLSRDKEAFISWFRYTQ GIDGGWGIIPDHASDISVTVEAYLALKILGV  
SVNDEAMCKARSFAISAGGA AKVRMFTRIYLA MFGLFPWNAVP EMPAELILLPARLPISI  
YHWSAWARATVIPLL VLLHHRPVYALPSEK MPCNEYLDELWCNPREKNIPYTRDLSTM  
LRSDPVAFTFTLADLILRYLNG LRSFN PVRRFALQNCVKWILEQQEDVGDIGDIMPPLHG  
AMFALNLQGYPLYADPMRRGLEA IERFAWQDEY GKRIQTTVSAFWDTSLMLLGLADAG  
IKSDNSWL TGSLSWLR SRQILNNSGDWKVNNPGLRPGGFSFGYFN TSYPTDDTASAILA  
MIRQGARLIHSPSVRHAINWLLGMQNKDGGWGAFDRDNHNL YLDKIPFSDMGGLCDPS  
SPDVNGHILEAFGVFLAVSLQ QKS WNTAKVLISNVVSSSQRAIYYLSAAQQPSGA WYGR  
WGCNYIYG TSAALCGLAYFKGSK KSENCYERDDSIADDVSRAISWLASVQNN DGGWGE  
TIASYADPSRAGCGPSTASRTAWALMGLIPYMPASTESIRRGVEYLLRTQIKSGIDRVTW  
RETSYTGTFPNHLYIGYSFYPHYFPMALGRYVHARQGLGFDWDIGLFT

>6780\_t gene=6780\_g

MPQHADSFQFSLLDTVNNQPDHANQIKDQYV VSSLQNGTILIEGNSLSALS YGLHRYLA  
DVAHVDMW WFIGNRLDVAPEELPAIQPLTGSSV VQWRYHFNTVTFDYMAAFWSWSD  
WEFQLDWMALRGINLSLAWVGYEKILLEVFREIGL TDEEISTFFTGS AFQAWNRLGNIQN  
FWRGALPDVWVESQFKLQKRILARMVELGITPILPSFTGFVPRAITRVLPNASVVTGSQW  
NGFSFDYTFDTFLEPCDDNFAQLQKS IISKQQA YYG NISHIYALDQY NENHPYSSDPDYL  
RNISRKTSQSLKDADPEAVWLMQSWLFLDTTFWNNETIQAYLSGVENNSDMLILD LFAE  
SQPVWQLTDSYYGKPWIWCQVHDYGGNMGLY GQIMNITENATLALTSSETLVGFGHT  
MESQEGNEIVYD LLLDQAWSEIPINTTQYFEDWVIVRYAGTQNV PQQLFNAWEILRWSV  
YNNNTL TSSSVPKSILELEPSKCGLLNRGGHHPPTTINYDPGVVVQAWELTYEAALSEKSL  
WDNPAFN YDMIFLTRQVLANAFIPQYELLISL YNNENYSIPAIMSAGQQLIDMLLSLDTV  
LGTSECFQLAQWVNQAVSWAHGNSTLAVYYEYNARNQITLWGPNGEISDYASKQWAG  
LISSYYVPRWQIFVDYLQSTY PDAYDSAILHQ RMLTFESDWQQTLEGQRNVTAVADLRH  
VLLDVQRQWPQIWRGSTRYPDAHTSAEYPL YHGDFQSPIGPTQSF

>6784\_t gene=6784\_g

MFSIHSHLALITSLVLCGAALIVTPKASLTASAPAAAFTYNSNNFLLHGKPYTIIGGQMDP  
QRIPAVYWRDLAKVRAMGLNTVFSYIFWNDLEPEEGRWLSHEPENDIATYLRTAQEEG

LNVVLRPGPYICGEHEWGGFPAWLSQVPGMEVRSYNGPFLDYTRRYIERLANISGLADL  
QVSRGGPILMVQVENEYGSYADNHRYTAAMRDILRASFEVPLYTNDGGVDWTLEGGAI  
PHVLAEVDGGSWALAARDKYVTEPSELGPLLDGEYYTLAPDQWGSYNPHNTTVGKPD  
VAGILSDIGYHLGNASASISFYMVHGGTNFGFKNGALWQNRTTAFTTSYDYGAPLDESG  
RTTDLYHQMRSHIAKYVNETIPEPPSNLPRAYIPSFPLCPTVSLFESLGKKTVSNTPLT  
MEE LGQSYGFTLYEHTATESVTGDLQPGDRPRDRILVYVNGYIQGIMDSQYQHPLNVS  
VSLQ PGDQLQLLVENLGRVDYYSRGNLYQNYVIDPYKGVKGNVTIGGQTTYGWD  
MYPLQLD TLPFGPCLYPQQSRASSDSPMFYKGSFMGPKVMNNSTMTLDTFLTIPNGI  
KGNVWVNGF HLGRYWLVGPPQSLYLPGSVVNPEMKNEVVILELEPWHINATILEAYG  
VSERFWGNNPD PDCMKCV

>6785\_t gene=6785\_g

MHSLWLFAILGLGRVVAADDGLTGIPTVPFTKSARETIFKLQDVEAILVDPEYAFTTDMR  
GMTLIPPTLLDFATKFTEDLNSYLQKNQGNINVSVHTSEIPEKGYIYLTGSPEDFLDAAS  
RETSEGYTLSITQTGITITGASPLGVWGTTRTVLQQAALNNGELFLGTGTDAPGWGIRG  
AMLVDVGRYYYYPPSFLIEMCSYLSFFKQNTFHLHLSDNLYNNVDIYSYERQMDLYSSFRL  
LSEDPVAVAGLNKRANESYTWQDFDNIQRECAARGVTIVPELEAPGHALVITQWKPELGM  
SSDMSLLNISNSNTTPTMEEIWKVFLPWVHFSKTVHIGADEYVDASLTKDALAGEYNTFV  
NAMNSLMGASANKSIRIWGTFPPSSNYSNNIATNVS IQHWEFFEDNPYYDYIANKYEVL  
NSDDAFYVVKYSGSYPQAINLTRVFY GAPNGEPYAPNIFDTSNATNPPRDNPLVLGH  
VAALWNDYGP NATVYSEAYYAWREGLPALADKQWGGTLEDEYNSIFATLHAAVPGQ  
NLDRSIASESSTILSYSFQDQPHLPVIDSSGNKYDGITDCQIVDDALALTPHCSLSTPLSSK  
GRNFTLSFSIYPASHTPGAIFSGADSTLLAGYESISNITLLASGNLYTLNYSPLNTWTNVS  
LIGEGNATYFVVEEGNEKDVKQMEFLTKMGINGEFFVWREIAVEAPLATIGGAGFEGLL  
KDVVLF

>6789\_t gene=6789\_g

MNPESAAPS VTLRQGTVLGVQLNSEFPNVVNAFLGV PYPALPPVDDLRFRLPVKVATSTK  
IIDASKCGPAAPGKDLLIGGLKIEKNEDCLTANIFQPVANHKKLPVALYVHGGAFNRGSA  
SMHDTASMAVWSEEPFIAVSFGYRLGALGFLPSALS KKEGILNLGLHDQILLFQWVQENI  
EAFGGDPGNVTLIGLSAGAHSIGHLLNYAEHRKPLFHRVIESGSPTSRAVRPYDAKVH  
EQQFQDFLREVKCPENL TESEIFPFLRSLPSSVITDAQALVFDKWNPSLRWAFQPVIDGDI  
SRKPLDAWKSRLW NKVPIMTG FNTNEGTM YVDKTMCRPEQFRGFWQTLLPELSAADL  
DTIEKLYPEPSADPKSPYVETRLEHGLGTQYKRIEAA YGHYAYVAPVRQTAHFASSQGV  
PVYLYHWALARTVVGRANHADNMY YETYSNIITLSSESQKELSGTLHAYITSFITHGDPN  
AISGRYAQRPKWKVYVPDKPRVLILGQGNEELIGGDVAPAAKFQADTWNREQTDFWW  
SKVEISQMS

>6855\_t gene=6855\_g

MARSTIYPHFRETVTGKQLIVNGRPFLILGGELQNSSLTSADYMDTVWQKMKDTNYNTL  
LGCVCWENIEPVEGKFKFDEL DKVILGARKHGLHLILLWFGSFKNGISTYTPTWVKTDV  
KRFPRAKLRKAGGILETSEALSIFHDEAPKADAKAFAALMRHLREFDGEHSTVIMVQVE  
NETGLLGDSRDGSKAAEKRAEPVPQDLIGFLASDWN LHADFKTNLEVFKTTQNSSTK  
EGSWEEVFGKDAHTDELFMAYHYAHLERVAEAGKKEYPIPLYTNVWQNYVGD DRDE  
SFPVVVGGGGHPGDYPSGGGTSNVLDIWQRFAPSLDLIAPDVYLNEYTSSCKKYRHRNQ  
PLFIPEQRNDYGARRIWA AFGSYQALGTSPFGVDTLEPEACAFTKH YRLLDSVSVQIVLE  
AQRTSLTASVGGFFDEL PATGEDPARPIVVSHWPGEITIEPCFVFGKRSPAAGMVIHRGG

AKFLLIGWGFQVRARSLSASSTFTGILRFEEKYVVDKETGQLATLRALNGDETRSGRFA  
MMPSEDPDYGGFPICVTIPARTMIAEVEFYDVADDC

>6866\_t gene=6866\_g

MPYSASTVGGVLVILLASSFFDVAKCSNTLLPLVFEPLPLGSVSAEGWLQDQLQLMSDGL  
AGHEHDFYLFVSNSSWLGGSEYSDLNEGFPYWFNGLVPLAYTLNDRERLKSQVLDSVN  
YVLSHQDDGWLGPETDVNTRNLWGRFPLFLGLTQLAEAENGTDVATSVLDGMHKFV  
ELMNSMLEDNFLGYVASATSPIDDQWGRSRAADMILGLQWLVEHDPRNDTDIIFNSMN  
LLFEKSNNWADWYVDGVYIKQDLDTVSVDITNAEYAFEHGVNVGQGYKFGAVIRRFN  
GNDSLGDSSRTAVNWTLTYHGQPSGVMIADERLSGLSPVRGVELCAVVEIYSLNYLYQ  
ALGDAFFADNAEMAAYNALPVMLTPDWWAHQYVSQTNQPISHTFDVSPFYNVDTTEGQ  
HYGLAPNYPCCTVNHPQGYPKYVSNYSYVQYGDNGIAHALLGPTSVNTTTNSGTSVSVSV  
DTLYPFVYELTYTVEASDDDFYVRVPTWATGGSFFSINSGSHEDLLADSSTAMHHLPLR  
KGRRTIFYSLAGDIRVADRANDTVAIYHGPILYTIAPGENYTSYSSGYAGAPSQALEYDIY  
PTTEWALAI DPSTLSYNAPQGASLPNIWTLNAPPGSISATVCEINWSLTEGYAPNPPLL  
ADRNCTGDPFQVNLVPYGSARLHIAEIPTISLS

>6919\_t gene=6919\_g

MLSKHEYDIRELPDDRILYSLKYRKALYFTSQAAIWAFLHYFLVRLLLVLTAPQQTWQI  
WLMLFVEYIFARSPRNDQVLTVSASNSGQSRPRDRLRLGNDNLPRVNVLPCCGEPTDV  
ILDTVHAACSM DYPTQFRVLLDDGASNALRDAISSLRKWP HLSYHTRGQQSGRVFA  
KAGNLNYALFELRNEVQPEFCAVL DADCMPKPDFLRATLPHLLRDPQAALLTTRQYYY  
NLPDGDPLQQSRTHFYTCHNSELD RMASAI DAGSGAVFRRQAIVDVGGYPTFSFSEDWQ  
LSMLQGLGYRTLQVLEPLQFGLVPTSLDGHIAQRNRWQLGHSQQPSVLFSDNDQAI PR  
YKWSITSNGVFIVLGLLGYMLGFAAVPVLFASGNLIPTT SPLIVQIQAILAVLFVALTWI  
HGLIQA AHTGFRIAPFAHLENSWLASTHILAI FRFHCISKKPKGSFVTGSSANSWNRMMK  
LPKYEKL RKDLLDNGLLYSLLLFLATLGTFLISFHGAFINTSTAAQPLLVRLLATLAWPP  
MLHIAYL TSNLWIPIAYLLRRPEHPERRSKMTAHANGIFLPRDDVQKKLLEHSVSPLGY  
LNHYILVSVVLVAVLIMAVAL

>6926\_t gene=6926\_g

MFGQTS LIAGLLLLPLQTLAQLHTSSRWILDANNHRVKLR CINWAGHIDVRIPEGLNKQP  
IDTITSWIADNGFNCVRLTYSIDMALDPTQSVSDSFTAAGTAWNVESELTDAYNAAVTH  
NPFLADASTLDVFANVIDSLDSKGVMTILDNHVSRSASWCCNLT DGNGWWDATATGYIAS  
NSRYFNTSEWLSGLGAMATFALDHPGVVGM SLRNELRPFPIQLDLTHTDWYNYVTQGA  
LAVHNANPDV LVIIGGSQSATDLSFIKVSNLDFSQWAGKHVWEFHAYSFTVTFPGNTDC  
TVADA EYGFDFGFLLTQNESY TAPLILSEFGVGTGGPNFGLSDKDYNLQCLVSYMES  
NDAEWI WVAVQGSYYIRDGNVDYDESWG LLNHDWSDWRNSNFSGLLGQMWNVTQGP

>6941\_t gene=6941\_g

MPPRSRDEFKVAIICALPLEADAVEALFDEHYDDLGHVY GKHVGDANSYITGRVHNHD  
VVLAYMPGRGNRRSASVARSLLVSFPEIKLALLVGICGGVSYVSDGTEIILGDIIIIGDSVIE  
YDYGRQYPHGFERRSDVNEILGSPNQEIQSFLSRLRTRRMKTHVQRHTAQYLQILQGM D  
GNEWNYPGVSHDILFEASYRHKHYQQQSTIECV CVGCHSAFDPRNRLNVDRPSSLIHIGT  
IASASSVMKSGQHRDQLAEQEGVIGFEMEGAGVWEVLPCVIIKGVC DYADSHKNKAWQ  
NYAAATAASCAKGLAYWEGVFQRALTGREKELGAKNLDTLASISNLGLVLQSQGKYR  
EAEAMHRRALTGREKALGAEHPD TLRSVNFLGLVLQIQRKYEAEAMHRRVLTGYEKA  
LGAHPD TLTSISLGLVLQSQGKYEEAEAMHRQALTGRDKVLGVEHPD TLTSVNYLGL



V LISQGYREAEAMHRQVLAGEKVLGAKHLDTLIVVDNLSFVLKIQGGKREEAEAIHQ  
ALAGRKKV

>6965\_t gene=6965\_g

MGVFATFRRRWQRLAVASVVFVCMVAFSVLSHRGEQFFTPQQYSEARPEFSSDTPLIWKH  
INSSTVKGGAFWIPPEWLSPTPKPTTMIEAARLVSQNLINISNTTHLIENTEIPLVAHQWTK  
NTHVDTWPD LIRDSVERWMENVIETPMAYFLWNDEGIMEFLEEYEP AIIHFSA LPRMV  
EKSDIFRIMVCKYIGGVYGDVDTRPLRSPATWIEKTDLVPWRDNETDILYNSTKPVRAIF  
GIEADCPPD TD TYWRMGYTNPVQLTQWALASAPGHPALTWFIQKIYGIVDEVASHHDG  
NLTAPEAYEELDYLEPLLFTGPD AITVSMRSWLED RIGLRWNAL TGLHDNGRSKL VDDI  
LILPITGFSPGRGVYGNMGSKPVT DHDARLQHLAQGSWKGF DLRL EFGKMCRTFFGMC  
RDWPRS

>6968\_t gene=6968\_g

MSSSMLELINSRRNAEQERTRYVESQRPINIAPSICHLYLRLATLTFTKAVALSIEEANTQ  
QTKTMHLHIGFYLLWSSFVLGCVSAANDVSVLINEVGKANNQSLLWGPYKPNLYFGVR  
PRIPKSLTAGLMWAKLDNYATAQANFRHTCEQNEGMRGYGWDEYDVRKGGRRQSIHDV  
GNSIDL TIDFVKVPGGLHGGSWAARVKGTPREDAPE DLITSLVFYASLEGLGSLHVDNA  
VEQQIGLKGDKLKGMTPELGDFKISVTTGPD SNKHPEFDHPSSEKSLDRPLVASVETS  
QENLWQAKALMFTAMKPEVDNMLAKYGT DTPPPAQLFTVPDHPGTGNIHFVQHVFE  
GAFEDILFESGSTSEPV TSETLSEKIDELSSSFSSRYENVFAPQAPFDKPEYSEFSKSMF  
SNLVGGIGYFYGSLVDRSEAPEYEEENEGFWEEAAEARLRVKPTEEDPHELFTSIPSRP  
FFPRGFLWDEGFHLIPVVDWDLDLTLDIVKSWFNLMDEDGWIAREQILGMEARSKVPPE  
FTVQYPHYANPPTLFLVLEAFVDKLQANKSIIENFELNGADIADSLRSAHLESKELADSY  
LHAIYPLRRQYFWFKKTQWGDVKS YDREAYSSKEAYRWRGRTVRHILTSGLDDYPR  
AQQPHPGELHTDLISWMGLMSRSLRKIAAAIGEAEDAEEFAIYEYAITRNIDDLHWDE  
DAQTWCDATIDEYEE SVHVCHKGYISIFPFLTGMVGPDSPHLKATLDLIRNSNELWSDY  
GIRSLSKSDEFYGTDENYWRSPVWINMNYMIVKNLYEIATSQSPHKAQAIDIYNELR  
KNLVENVFRQWKDTGFAWEQYNPETGKGQRTQHFTGWTSLVVKIMNMPYLSSSGR  
GHDEL

>6986\_t gene=6986\_g

MQCQHCPKRFFDRNEFDLHSQSHNERQQKIQDPNSEIGAFLQANAPEGPRRSVLQGSILL  
SHWHVTGAKNYDQASADIKHFQDVLRFPPRPNKDLYTTELEDFSCADCDAIFSSSAEL  
DNHRFSKFCPGA AIVVHVMMRDNLINKGYRIERLLIPEGYPLRVPCNKCKDVFP  
SDEAKEAHENLHQTHELTCVQCGQKCDTPYELRLHYDFHDDMEFRQTRKEVSSSK  
SSHRRASSHPQINNHHGGSITIP SPTENAIRRIHKRSQRLLDAWSLKKAGKGEDGEIV  
AMSFSLPEDMERVHAINGKLQDVEARAVVNF PITQFTTWLDMRDNDENCLDSPTCSEK  
DSLSEKGRLSLDEDKGAVASRRMSLLKSVLGLRLPKRLSRSDTSASQPRKLMKKENS  
VRFVSKPNKSGETTRSESRTSNKVPEPSEKTM DLGSPREDETTGGSDSPFIHVRI  
SADGAIVEDKSGRRRVLQMEQIAHVYSVVSADTSLVSIKSRITSLQARAETDLESEN  
PRDAILAYKEILD SLNKYPALDTNFRIRSGIYHRLG SVYSSVGAAGESEYFLKALAIY  
RRIYGRDQSVIYALLNDIAKLCEKDG YATEASALYERVLGRLRVLGHNDPETLNSM  
QYLA SIKMSLGDVESALQLLEDAVP AFETVLGLQNESTLVAISHLSILYQKLGLKEQ  
SLAASRKIIPHCKNVVGYDSILTRNTVIRYLEESESDFPADVKVILDHYRRSRSAE  
SFRVLQTLGRAYMDSGLNRDACEVFLSLLDET TGAKELDSLEFFDAL SALCVALEH  
LGHFDEAIKNYGQLLSAHKMPSDHPSRSRIDYARS RVTDLIHRREVLTAERRA  
WEMFEDGPCTYCQSKTKSLCNTCHIVRFCSAACHDKGRIKHKLSCIPSVTLRESRS  
VAIAPRCPPAVQNDALSMILPAERGNTPPSITASHTVYLDPRNFTNF

RMKLSSNVNTLLVFSPEADIRYTIIGNLSESGPDQVSIPTASVSTASAGKKPSNRTPTSTLTG  
HEWLTPAQQESVSITPMEQSAIYLIVAPGEQMMKSLVEKRVRRARSGGGEKEYFEALDIP  
DSKLIEFAQGLMMNGYMGAEFLYIVGWM

>7038\_t gene=7038\_g

MSVHQALGFDRHESVFQHDQVKSHLVRCDWSGPTIDTLYAGIAGTFADGKSQIGIALRN  
ETYLLDFLEQDFKGSSETVICDFILTELQNYNSNIHAEKILGAALSKSFHQQCPSLCRRLW  
LELDIVPILLNEEPTERTVVTEAVTHPKGKEIDEQAESVSRKCIRFFGPNKLPFLHVDFLG  
AVEVDSGFHINIADLESFRTVRPKTWSGVQHYVKDLRSRKVKIAFFSATPQGGGVALM  
RHALVRLSHLLGIDVKWYVPKPRPGVFRITKTNHNILQGVAEIPHERLGPHQQRVLADWI  
EDNAHRYWTRKGGPLTRPSEGGADVIIIDDPQMPALPIAKQADPNRPVIYRSHIQMRSDL  
ISTPGSPQSEVWDFLWSYIKLADIFISHPVASFVPHSVPLTKLGYMPACTDWIDGLNKDM  
RDWDYAYYGRIFNHACRNAGMPPINYPDDQYIVQIARFDPSKGIIDVLKSYKEFRLLTQ  
HSSNLRVPKLLICGHGSVDDPDGSLVYDDVLKWKQNASALSSDITVMRLGPSDQVLDL  
LLSNSRIVLQLSEREGFEVKVSEAIHKGKPIIATRAGGIPLQVEDQVNGFLVEVGDVQSV  
NHLRLWTDSNLYDRISSSDSPYRVSEVSTVGQALNWFYLCSSLSQNMSLEPKGRWIH  
DLARESLGQDYTKADGKLRVDETVLSV

>7059\_t gene=7059\_g

MADSKYQPVPRHDTLDSLSQSNSTLQHQQTQHNLDPADVSDLSSHDTDDENDMMDLDEE  
GGGDETVMAPLNRRASRSSGSSKKRQKLSRRSLTNSKFRGWLSLLTKSIVRHRLALVA  
AAGLIFIFLPIAYQRSIRNFFWADQVYESPPWYPSPRGGTSETWAHSYQKAKTMVQNM  
TLLEKVNVTGTVGWSMGLCVGNTGPAMDAGFPSLCLQDGPLGIRFADHITAFPAGLTTA  
ATWNRSLIEARGYLLGTEARGKGVNVLLGPSMGPLGIAPAGGRNWEGFSPDPVLSAIAA  
ADTIRGIQRTGVMATAKHFMNEQEHRQGREWILPDAMSSNIDRALHEVFIWPF AESI  
RANVASVMCSYQMVNNSYACGNSKLLNGILKDELGFQGFVQSDWLAQRSGVISALAGL  
DMSMPGDGATWADGKSFWGKQLTIAALNGTMPMERLNDMVTRIVAAWYHLGQNEPG  
DNPTSPNFSSWTNEENGHLFEGSGDPATGKVNHFIDVQGSGENAHSITARRVAAEGTVIV  
KNEDDTLPLSPQGPSSFGKPYRVGVFGEDAGPGKGNFCVDRSCNQGTLASGWGSGAV  
EFPYLVTPIDALKQSFDETEVEFQGYPSDKYEDKDLDNHDLICIVFANSDSGEGYLRWDD  
VSADRNNLFLQKQGDGHIQRVANNCGGEDGVTIVVIHAVGPVVVEAWIEHPRIKAVVL  
AHLPGEESSNALADVLFGRVDGGRLPYTIGKSLEDYGPSAQILYFPNALVPQVNYTDGL  
FIDYRNFDKHNITPRYEFYGLSFTTFEYSDLVITPVREKSPLSPRPKAPVSPPEYSQTP  
DARSALFPPGFRALNKYIYPYLSDLSEIKQRHFDFPKGYKEYTLSPAGGGEGGNPSLYE  
TFVVVTVNITNTGTRTGQEVVQLYVSFPNDVKDEDVTFSDYIEFPVRVLRGFDKVELAP  
GETTKVELALTRKDLSYWSTRRQNWMPVTGEFTIALGNSSRTMILEGRY

>7068\_t gene=7068\_g

MSSSDNFRLRRKVGQLFAVGFHGYTPSSEIKTLIRDYGLGAILFRRNIQDAAQLQALALA  
LQQEAKDAGHEHPLFIGIDQENGLVTRITPPIAAQQPGQMTLGATQSTANAYDVGKCTG  
EMLSFFGINMNYAPDCDINSEPLNPVIGVRSPGDDPNFVARIASATARGLRESGVVPTVK  
HFPGHGDTAVDSHHGLPVIKKSRSELERCELIPFRAVAEGIEAVMTAHIALPKITSGQKS  
EDLPATLSSEALGILRNDMKYDGIITDCLEMDGIRKTYGTVEGALMSLKAGSDSVMICH  
TYDVQVKSIERVVEAVQSGELPESRINESLRRTSLKEKYLWEHALRSADESSLDDLQA  
MNQRHQQAERVYSQSTTVVRNSLGVLPITKAVSNVLLLTPGGKIPAGGAVDDGGPKHR  
TYIDVIREVIGNTTSSIAQVDYDPTEELLDEHWRMIETDGNIVILVTRNAKEAEGQRSSAL  
EVAKRRKDVVVIATGSPYDFLDDEKSIQTYVATYEATVEAFKSAIGVIFGRAPARGMLPV

ASTSNKQRDPNYKILSLSSESQKVPMEIGILKVWSAALPKYVLPALNLRIVIDQPHGHHFIA  
QDAQTATIIGFCLSYTSQNGQTSAEIAVIAVDPTKQHIGIGTELLSATREYL YENHGCKN  
ASLRSYFPRFWPGLPADLAPEIEQFFVHRGFRLRRGGDADLYQDIREFASPQQYINKALA  
ADVITYKAIETTEEFEDCLVGQKRNFSNYTGWVETYISLPPSRHPSSIMAAFDKHTGTQIA  
WTLMLSPDDNFVAQNWAFPPLASDSLKGTGIIGCVGVDELHRSRGVGLALLCHAIEDM  
KKRGVEAVFIDSTDKVDWYGKVGFGFRWKEYIHAEI

>7102\_t gene=7102\_g

MVQVVKVVCEHHEPNTIGIGESRPRISWTTAGEERDWQTSYEIEVTHLDGSLRDSVKV  
DSSDSRLVPWPGKALTSREQVNLRVRVSGVGADAAGIVSSNRSEGSAPIRVEAGLLQPE  
DWKCSLIEPNESTEILPEKRHRPITFRRHIQCPIDVAIARARLYITAHGIYEARINDSRVGDH  
ILAPGWTSYQSRLTYQTYDITSNLASGQDNEIQVDVAEGWFCGSLAFTRRHNIYGSRLGL  
IAMVVVELENKETICIGSDDRWCWAHGPIIEAGLLDGEAYDARKMLHSQTVWKNVQTN  
LEFPSSRRLTAPDGPPIRKTQEFEVREIIKSPSGKTILDFGQNFAGWIKVKQVDGAAGTTI  
KFQFAEVLEKGEIGTRPLRSKCLDTLILDGNGPITWEPKFTFHGFYVEVTGWPEESTTP  
LTPQRFVGVVIHTDMQVTGSFRCSNPLLNLHSNIVWSMRGNFVGIPTDCPQRDERLW  
TGDINVFGDAAAYLFDVSGMLTSLWLKDMMIEQKEAGGAVPLVIPYILGDFGPGKSAEAV  
WGDVAVMLPWKLYTTTGDISLLVRHYESMKDWLNAI PRSETTGLWKQDGYKLADWL  
DPSAPPDDPVNAMTDMYMVCD SFLIYVTALMVKIAATLNKSREEQKFYQDEATKLRQM  
FADEYITPSGRLACDTQTAYALAI EFDLFSSPQQQTHAAERLSMLIRQRNKFKIATGFAGT  
PYLGHALTKVGKSNV FYRMLLHRECPSWLYPVTMGATTVWERWNSMLPDGSINPGDM  
TSFNHYALG SVASWMHQTICGLKPIDAGWKT FKVEPIPGGNLQWAEAEYHSVYGHCRV  
RWEIKNNPDKNQPVLWLEV VVPLNTQCHVHLPGSKDSFTV GSGMREWEVDYHPEEWP  
VRALLPPFKPADDELPADEV LQHNW

>7104\_t gene=7104\_g

MDAGGVSLAPAAEELKFESNISINEIDDSTKDDIPGSESLEGLGEAQDRAHHEEQPTNKSL  
LNELTLEEKVTLLSGTDFVSSSIPRLNIPSLKVVDSVNGVKGSEIHHGTPTAVFPSS TLYG  
ATWNNSLMEELGKSLAHQAKL KSAQVILGPTINIHRDPRGGRNFECFSEDPLLSGQLAAA  
VVRGIQSQGLAACPKHFACNESEFKRRQYNVAESHNSRTVREIYLGAFQELLRKSEPHGL  
MVSYNKLN GVHTTENVFLKEVLRDEWAYNGCLISDWFATKSSVAAIKAGLDLEMPGPA  
VFRGQRLVEDVRKGLVDEKAIDECVTRVLELIDATKQCHSQAPERGEIDPETSALALKIA  
SEGIVLLKNKNALPLDMRQAPKIAVIGVHAVEPVISGGGSASAPPQYLQRPLDCLKEAH  
PVPSLVEYARGVNTNRIIPQAPLDR TTSKSGKPGFDISYFNQDCDTPVHSEHQHVPVAM  
VRNLKPG LKEPGFSYEISTTITPTSTGLHTLAARVTGAFSLFVEDKCVLSSSTQSEVSMED  
FLFEPARLERRVSPMLAGKSYFV RLLTQARIPKENDYEPNPHGAVLCYEEYVNDRTSIS  
EAVQIAASSDVSIVFAGRNHEYESEGF DLDTIILPERQIKLIKAVAAVSEKTVLVLNCGNPI  
DVSPHIDDVDAVLNAHFPGQEGGQALANILTGKANPSGRLATTWPKKFDEKYIPTFH NFP  
ATLDEDEGEYTLKYAEGIQIGYRHPDVTKTAQWEFGFLSYTTFEHSDLLIDNTSESDIKISI  
QVKNMGIFPGHEVVQVYVLP PNSENAWRPARELKGYEKVWVLPGRSETVKIYLDKKHT  
FSYWDEEIKQWRLEPGAYRLIAGSLETCFEVEEGLTWSGR

>7118\_t gene=7118\_g

MGFFRPLPDPLPGA KTYIYKTVGALNLEVDVFTPT EATYQDPAMVALFIHGGAWVGG S  
KTEYCRPLFNEFLSRGCLVASAEYRLLPESSFVSGQLEDIRDLEPWLRQQLPRLLEKDGST  
TIQVKDVIVIGASAG AHLALLTPKLWRQTPAAILSIYGPTNLHQIPPVTTGPAVMCETSFKI  
SSDAIDMEQPISSTPHPA SESEFFDPRRQLGMQVFRWGLVPEFLLCGLIRHALDDGTFEW

RLPEKGMVTTSDIDSISPLHLSAHTVYPPTYQILGSQDDLSTTHATSLAESLERQQISHEE  
HIVDGANHAFDLWSEMGDQIHLEVMRPAVDWIKKSIGP

>7123\_t gene=7123\_g

MRHSILSLFGVLSVGNAINVSQNGGNQTSPLQYGLMFEDINHGGDGGGLYAELVRNRA  
FQGSTVYPANLDGYDTVNGAILTLQNLTNPLSPSPSSLNVAKGSANGRIGFANEGWW  
GIEVKPQKYEGSFYVQGDYDQKFEVSLQSKLTGEVFTAEIKSSGNHKDWWQYKYELLP  
KKSASNTNNTLAITFDSKGLKNGSLNFNLSLFPPTYNNRPNGLRIDLVEAMAELEGKFLR  
FPGGSDVEGVQAPYWKWNETVGDLDKDRYSRPSAWTYEESNGIGLIEYMNWCDDLGL  
EPILAVWDGHYLSDEVISESDLQPYIDDTLNQLEFLTGSPDTPYGSWRASLGYPKPWQIN  
YVEIGNEDNLYGGLDYIAYRFQAYYDAITAKYPHITVMESLTGMPGAAAASDYHQYS  
TPDGFVSQFDYFDQMPASNRTLNGEVATVYPNNPSNSVAWGSFPFLYPWWIGSVGEAV  
FLIGEERNSPKIIGASYAPMFRNIDNWQWSPTLIAFDADSSHTSRSTSWHVIKLLSTNKITH  
NLPTTWNGDIGPLYWVAGRNDNTGSNIFKAAVYNSTSDVPVTVHFAGSHAKVANLTI  
LSSDDPNASNFPGGPEVVKTQVSVTANAQGAFFESLPNLSVAVLKT

>7128\_t gene=7128\_g

MRVSLVTVGCLASAVAGVAVNPLPAPRSITWGTSGPISVPQNLDVQLPNAIISNAWERA  
WTSIKQLKWVPQATEAPISSYEPFPTAAPTSTPSTPLPSSSAVALNSQKRGHSQTTLRT  
VKVTVADLNADLQAEVDESYTLVLDSGSSTLAITANTTWGALHAITTLQQLVIFQNNGLI  
IEQPVSIEDSPLYPWRGVMVDTGRNFITTNKIKEQIDGMALSKLNILHWHLDDSQSWPVH  
MNTYPMQTKDAYSPSQTYSHDDIKDIEYARARGVRVVPEVDMPGHSAAGWQQVDPSI  
VACAHSWWSNDNWPYHTAVEPTPGQLDPLNNKTYGVVEKVKELSGIFDDFFHVGG  
DELQTCYNFSTYVSDYLAADPSRTYNDVTQYWVDHAFPIFKSIKRNKLVIVWEDLVINSP  
HAPNVSTEGILVQSWNNGITNINNLTELGYDVLVSSSDFMYLDCGYGGFVTNDPRYDV  
MVNPDAVDGLANFNWGGNGGSSWCAPYKTWQRIYDYDFTTGLTTAQAHHVKGAVAPL  
WSEQVDDTVISGKMWPRAAALAEVWVSGNKDPKTGDKRRTTYMTQRILNFREYLVANG  
VQAAPLVPKYCLQHPHSCDLYYDQTAVV

>7129\_t gene=7129\_g

MSFLGGAECSTAGNPLTQFTKHVQDDKSLQRDRMLMGRTPGMQESMRSRGMAGPGDQM  
MDEFMQQPGLPHQAPVQPFAMEQMRREIESMQHAPQRTGSPGWAAEFDGEQARMEA  
AFQGPNAAPAALDSRGGPGFSAAEFQRFQQRHTASPITQSTQSPMMSGYQRPMMGGY  
MGAMGGMGAMGMMGPSYMPMQQQQQQPAAQQQDGKGGKGRMVELDDENWEAQF  
AEMDAAGQEAFFDDQANQAMEAELNDLDRSVHTTFFQSLGQDEGFDQFERVWQSAQAE  
NTASRQLAEDDFEEVANLHLGDTSGWEGFDSLNTFRDPQLGDYLFEEEDNMFRAVGNP  
FEEGMKIMQEGGNLSLAALAFEAAVQKDPQHVQAWTMLGSAQAQNEKENPALRALEQ  
ALKLDPNNLDALMGLAVSYTNEGVDSTAYRTLRLWLSVKYPQVISPNLSTDTDVGFT  
DRQLLHDKVTDLFIQAAQLSPSGEHMDPDVQVGLGVLFYCAEEYDKAVDCFSAALAST  
ESGTSNQEQVHLLWNRLGATLANSGRSEEAEIAYEKALTINPNFVRARYNLGVSCINIG  
CYPEAAQHLLGALAMHKVVEQQGREKAREIVEGVDGIDDAELERMIHISQNQSTNL YDT  
LRRVFTSMGRRDLADMVVSVMVDVFRREFEF

>7168\_t gene=7168\_g

MKAAFLTAAAALMGSAMAHEHRHHHEHAALHRRGAEAEESCGCYTSVVTYWGAPTL  
VSVSPVSTPAPTTTSTSTTTLLSTSYSTVTVKASSSTPAVPLPTNSVTVFPTPGTYTIPGTTV  
TVSSSTVVPEVTSTVLPSTHTIGGVTTVVETSTTVVCPYATVSPVGSFTSVIETTTTYVCP  
SSGTYTIAPITTTVPASTVVVYPTPATVTPGTYTQPEQTVTVVETSITYVCPFATSSTPAP

APAAPTTTAAAPAVATTSLAPAPVASTSTSAPAASSTSTSSTGCGLGQHPDYAVTYTGYT  
HDTGACMSAEDVLAELKNIQANGFYAIRMYSTDCNQLETVASQAIGLGLKVLGVYIDG  
SGVSSGSSQVSDIVSWGKSNWNGIEFISLDNEALSDGFCSASDLAGFVSSAKATIKGAG  
YSGQFTVTEPLNIWQASGSLCGVVDFAANLQAFFNGDVAEDAGDFVASEVELLKI  
CNNDQVFGESGWPTAGNSNGKAIPGASQKAAIDSIRNSIGHIAAQFSYKNDHWKSPG  
DFGVEQYWGISDMLSSAE

>7176\_t gene=7176\_g

MPPVRNPILPGFNPDP SILRVGDDYYIATSTFEWYPGVQIHHSKDLANWDLIVRPLTRKS  
QLDMRGNPDSCGIWAPCLSHDGDKFWLVYTDVKKKDGSKDAHNYIVTAPKIEGPWSD  
PIYVNSSGFDP SLFHDDDGKKWVFNMLWDHRRRPR LFAGIALQEFDPVQGKLVGKRENI  
FKGTELDLVEGPLHYKRNGWYHLLTAEGGTAYDHACTWARSRSISGPYEVHPQKHVVT  
SKDAPFVALQRSGHGSIVDTPDGKTYLVHLTGRPVGQNRRCVLGRETAIQEGYWKDDW  
FYVKNGPVPSLYTDVPGVRDESDYWA EKNYQFNDTTL PKDFQWLRTPEPDRIFSVANG  
KLSLIGRESIGCWFEQALVARRQTHFSYDAETVVD FSPDDERQFAGLVAYYSAYNFFYL  
TVTADSDGEREISVLSSEASWPDGDLTFPGLKPIRIPKTGKVKLALSIRGGQTLQFSYALE  
GQESQTIDTVFDASLLSDECGGHQA HGSFTGAFVGVACSDLNGTAKRADFEYFVYRPVK  
DGADRYEI

>7178\_t gene=7178\_g

MLPDENGIDGWLRYAPLPSALISQFEQYGR IIALSKDDTSPVFTA AKEVQKGLKGILNQE  
VEIGHSLASYGQDEDKAAIIIGIIHEFSQADGDVARIPPLKEDGFWLDNQENKNVQILGQN  
ARGALYGAFEFMLLAQ GKPCPSGHSSNPSAPIR WVNQWDNLDGSIERGYGGPSIFFKD  
MVVQEDLTRVSQYARLMASVGLNGHIVNNVNSHHDLLSPKNLEGLGRIADIMRPWGVRI  
GVALFFDTPKTLAGLPTSDPLDPDVIAFWDRIT AQLHQHVPDLIGYLIKANSEGQPGPLTY  
GRTLAEGANLFADALKRYGDGVVVYRAFVYNHHLDESNWKNDRANA AVEFFKMDMT  
LFADNVLVQIKYGPIDFQVREPTSPLFAHLRKTPTIIEFQVAQEYLGQQSHVCYLPPLWKT  
ILDFDLRIDGKSSPVHKIVSGERFDWKRSGYAA VVNVGSDSTWLGSHLAMSPLYAYGR  
YAWDPLSDAEGVIRDWTRLTFA TNPTVVDTVTSISMESWPTYENYSGNLGIQTLCEITKT  
CHYGPRPDSMDGNGWGQWTRADAHGIGMDRTVATGTGYAGQYPAEIAQLYEKIETTP  
DELLWFHHVPYTQRLKSGKTVIQHFYDAHYEGAANAQTFAPRWEALRGLIDDARFKH  
ILFRLKYQAGHSLVWRDSVNNFYMDKCGIAD EQGRVGHYPWRIEAESMELTG YTVIPV  
TPFEAASGGKAIVTTSNDKPGTAKCTVPFETGVY NVAVNYDHLGGTSHYKLSLGGQVI  
GEWAGDLSTVLLHDFSDLRDGHSATRIVFESVNVNKG DVLEILGMPDGT ELAPIDYVSFL  
PPGIVD

>8622\_t gene=8622\_g

MIPLIALLLVSGLGQLVAAKDVYLEWNITWVNAAPDGYERP VIGINNEWPCPQVDVNV  
GDRLIVDVTNFLGNQSTAIHWHGLHQYTTGTMDGDAFVTQCPVPPGSTIRYDFTLDQSG  
TYWYHSHNMGQYPDGLRGPLIVHDPSPPFHWDDEFTVTLTDWYHQEMPPELLNQYQSTE  
NAQNNAGNEPLPEVALINDSTQSHFKVLPKTYLVRFCVGNWPGHAFLDDHEMTVVE  
IDGTWVEPYVPGQKNIRVAPGQRMSVLIKT KDDASKNYAFWDTIDINMMFINENRPIPD  
GYNPNATAWL VYDESLPLPPP VINEFD FIDDV SFVPYDRTPILDPVDHQIILNTGHTTING  
VSRFAVNGQTYMPQKVPTLYTALTVGPDY YNDPDVYGDVNPLILKHNEVVEIVINNFHN  
NLHPWHLHG HQFQVIQRSDVNGGFFNGYFANISSTPVIRDTIMVQNNGHAVIRFRADNP  
GVWLLHCHIEWHVEAGFLATVIEAPEQLQDL YRPADHLRICDAYGAPSNGNAAGKEGT  
DLRGANNIYEGDIG

>8623\_t gene=8623\_g

MTNWILGEKFNNAVYPHKNSIKGLWESKWKAACIKAVYPFHDGAYEDFEPIFEKLI AENI  
NDAYTDEYTN SFLPTAKALELKALEAAENGFRDKAAEY YRRAAVVYRISRFPYVSPTTK  
GKT VTSPLKRAAFDRQKEVYLKAASTWSPPIEDVVITHKYRAGNDGENISLLVRVPQLA  
DITNQVPVILLMTGLDGYRCDNSQRTHELVGRGWAVVICEIPGTADCPADPTDPESVDR  
LWNSVLEYMASRPEFNLKKIVAWGLSAGGYAVRAASTHRNQFLGCVAHGPGTHHFL  
HESWLERIDDHEYPFILSKAMA EKFQSVEDLKKDGQKKFSLLDNGHIIKQPSCRLLLN  
GVDDGVVPIEDSLLL FNHGTPKEGRFVEKLAHMGYPDTLVTAYEWFENLLTKGENPGL  
KN

>8627\_t gene=8627\_g

MVHSIRVLP SLALLANLVQGARVHFDLDTWKVGAPNGQERQMIFVNGQFP GPPMVLD  
QGDDVTVSVTNHLPFN TSIHFHGIEQRNTAWSDGVPGLTQWAIEPENTFTYQWHAYEYG  
TYWYHSHDMATLQDGLYG AIRIRPSQQTEDPLSMITNATELSAMRHAVQNAELIVSD  
WSQYTSFEYMDAMVQTGYDIFCSDSILIQGKGSVYCPPQEELISLMPSSVQHV LQANVTD  
KGCLPFVTGTQGLWEHHPEKLP AHLNDGCIASEGSRATVQVDPSHG WASLNFIGAAGEK  
SLVVSVD EHPMWIYEV DGRYIEPQYAETFEFYNGERYAALIKLDKEPANYNITITDTGGN  
QIIAGYANLQYLGAENSTRKSTPYLNYGGQPTSSDVVALNVS VLPFPFPIHPAEKADDF  
LLDL SRINSSWEWSLDGTSFLPADLGSMEPVLYNKESPLDNLKIITRNNTWVDIVYQL  
RIGDPSVTPVQPPHPIHKHSNMFLIGSAQGT FNWSSIEGVAASPQSFFLNKPLYRDTFV  
TSPRGEAWIAIRYFVQNP GPFL LHCHMETHLWSGMGMVLLDGYDVWDQIRSDYWEESC

>8638\_t gene=8638\_g

MAGYRPLRQQLTLFLSFIILANFVSPVVSVKHENFKTCSQSGFCKRN RAYADEAITSGSN  
WKTPYELDPSTIELKDG YLQGVVLKTTESGEKVR LPLTVSFLESGAARVVLDEEKRIKGD  
IELRHDRNIRKERYNEAEKWAIVGGLAPNKA AAFSPETETGYTKVQYGPENGYQM VIRH  
APLEINFQRDGETHIKLNDRGLLNLEHWRPKVEVPEGETAPDDESTW WDESFGGNTDSK  
PRGPESVALDITFPGYEHVYGIPEHADSM SLRETRGGSGNHEEPYRLYNSDVFEYELNSP  
MTLYGAIPFMQAHRKNSSVGVFWLNA AETWIDIVKAKSTSNPLSLGLT SKKTTQTHWFS  
ESGQLDIFVFLGPNPQSLSKTYGELTG YTQLPQQFAIAYHQCRWNYVTDEDVKEVD RKF  
DRYQIPYDVIWLDIEYTDGKKYFTWDPMTFPDPKGMHEQLDESERKLVAIIDPHLKNEQ  
GYPVIDELKSKDLGIKNKDGNIYDGWCWPGSSHWVDCFNPA AISWVKGLYSYDKFKGT  
FPNTFIWNDMNEPSVFNGPETTMPKDNIHYGNWEHRDVHNINGMTVVNATYQGLVERK  
KGQLQRPFVLTRSFYAGTQRMGAMWTGDNQAEWGH LAMSMPMVLNQGIAGFPFAGA  
DVG GFFGNPDKDLLVRWYQTGIWY PFFRAHAHIDTRRREP YLTGEPYMQIISQAIRLRYQ  
LLPAWYTA FHEASVNGMPIVRPQYYVHPEDEQGFAMDDQFYLASTGILVKPVVVKDQD  
SVDIYLS DTEKYFDYFDYTIYQGS GKWHKVPAPLDTIPVLMQGGHVIPRRDRPRRSSGL  
MKWDPYTLVVVLDENG SADGTLYVDDGEGYDY EKGGYIHRQFTFIDSTFVSEDIGAKG  
PKTDEYLKSMAGVRVEKIVVVGAPAEWEQKDTVT VIEDGAKGAAKASLQFTRSENGKA  
AFAVIKNPNVAIGKSWKIEF

>8674\_t gene=8674\_g

MVQLDIEKTLSEL DLLEKIALTAGNDFWHTVPVERLNIPSVRTSDGPN GVRGTRFFNGVP  
SACLPCSTALGSTWDVELLEQIGELLGDEAREKGVHVLLGPTINIQR SPLGGRGFESFSED  
GLLSGILAGYYCKGVQSKGVGATLKH FVANDQEHERMAVDTIITSRALREIYLLPFQQA  
LRICQTACFMTAYNKINGTHVSENASIIDDILRKEWKW NGLIMSDWFGTYSTSGAINAGL  
DLEMPGPTRWRGNSNLHHA VNSRKVADHV LDERVRNVLKL VNFQAQKSGIPFGAEKGLN

RPEDQKLLRRAAAESIVLLRNNSVLPFDKNKPIAVIGPNSKVAAYCGGGSASLPPYYTV  
TPFEGISNASKADV KFSQ GAYAHQTL PPLG PLMKTDFDSEKQGFVFKAYLEPPEERTSDSQ  
PVDEIHLVSSFGFLADYKNPRIPTDLFYADMEGTF TPEEDGLYDFGVIVIGTGKLFVDGEL  
VVDNATTQRQGIAMFGSATVEETGAKELRAGQTYKILFQYGSRPTSKLENRSIIDFGLGG  
FSFGAGKRLSPEESIQQAVDLASKTDQVVLVAGLNGEWETEGHDRENMDLPPGTDELIS  
RVLDANPNAAIIVIQSGTPVTMPWADKANVLAQAWFGGNELGNGLADVLYGDVNPAGK  
LSLTIPVRLQDNPSYINFGSERGRVLYGEDVYVGYRYFEKTGVKPLFPFGHGLSYTTFVR  
SDLKLHVDAEKPVLEDGETITASLTVTNTGSIAGAEIVQLWIQPPKLENIKRPVRELKGT  
KVYLQSGEKKTVSITVEKKIATSFWDEIRRSWASEKGDYTVLITGTGDESLSDKFTVEKS  
RYWLGL

>8691\_t gene=8691\_g

MSAKYILSGAVAMASFIGAQAALNLNSSGNIALYWGQNSYQGASGDLEQQNLAYYCQN  
TDVDVFLAFVTVINGP GGVP EINFANIGNNCTTFDGTALLECPVADDIKTCQAAGKTI  
LLSIGGATYSEGGFTSTTAATAGAQLIWETFPGDSSSALRPF GDAVVDGDFDFEATVS  
NMFATFGNELRSLMDADTSKKYYLTAAPQCVYPDAADNEMLNGAVSFD AIWVQFYNNY  
CGVNNYVAGASTQNYNFETWDTWAKNTSANPNVKVFGVPGNTGAAGSGYLSASAL  
QPVLEYSANFSSFGGVMWDASQAYANSGFISGVASDLGSSSSGTISRIMRRLVDRSYW

>8741\_t gene=8741\_g

MASLSTAVTYAGLTSVATYYGQ GAYQ PRLSTFCAETSLDIINIGFVNYFPDVGLAGWPQ  
TNFGNQCDGTVYTHNGETTGLLKNCHQIVEDIPIQCANGKKIFLSLGGATPEVGQYVAT  
KESAVAFSEWLWGAFGNDSPYATIDVPRPFDDVVVDGDFDIEWGVDFGYGYMANRF  
KELYNEYNEQKSTARKWFLSAAPQCAIPDAHLANAIHYAPFDYIWWQFYNDNHCSAAN  
YVNNVGGFNFDWVDVIGASPNPQAKLYVGLPAE ESEVNAGFYVSASSVEPLIDEYMK  
KYPATFGGVMLEWATGSLNNTTPDGNTYADNIKKVLGNCATSIAPSPPTSTPPPTSAA  
TSATSAATTAATFSSSSSSSSSTVVTPPTPTPTPSGSSSSSSSSSSSSSSSSSSSSSSSSSS  
SSSSSSAAISSAPTSTPTPTPSPAASSAVVIPSSAAVSSASGSTASSSSAIASSSSSAVI  
QSSSPAVSGSSSGVPAASSAVVPATTPSPSSRAVVSTPSSSPVRSTK PCTKKTPTPSSTAV  
VSTHSGSSSTKKPCTKSSSHVVPSSAVVRSTRTRSCSSKSSSTAVPPNGGSTSTGSTTAST  
SGSGSPSGTGATTVGTSTG SVGGSTGISSTGSATETTPASVGPTGTASGSVTS GVSAPATT  
GPVTGTSTAVATSTGTESWTTTVVTTSYVYVCPTGLATSTITITESYCPCTATAGAPTALP  
TGWTTTTAVCTVCGPQPTTVTLTLPPSVSATSTALPGANPGSLPGSGSSKPNGSGNGPSP  
NTGSETGPAPGSGSSPAGSSGKPGSGSAPNGAQPSSTTTVVPGAGAIGNSGPSASSSIAT  
TITVRPSSSFPKPSGTQTGVSPAFTGAAGRASISPIVGGVILVASL FALL

>8747\_t gene=8747\_g

MTKPQLPRRRVYKPKVQTGVRMKCPEQR PACARCQRLGLDCCYLPPKSIQASRNGRNQ  
KRASMRQILPAPASRIDMLPSSSILSRCNLQPGGGIYLECFRAQLALMDQDLDMTDFWLH  
TVLRASHSDDSVAYAVIAIGALARTRMHSNRPIFRNPDLPNQDEM KYNTAVMYNKA  
ISTFRGYIASSKPD DAGVRRRTILITVLFVVEIFHGNNRAADALTSTGILLLRDKMLHTVT  
TSGSASKSSLAGSIDDQGIIEAELFLARCAAICAKAFYLPYAHADGAKAML MIPSTILNV  
PPPPDGNASIKTFSFQFLNLLAAILIWHTRARAH RQMGISVDSHPPELLQQQKQLLIQLRG  
WVESYEVQLRMGHASNILHYFERQLLLTKLAHVIVLCEIDYTG NLWDVMAPDCAELTA  
KFRTHIDAELDGQLNQDGLISLENTFSWGIFLTAATNLSASCRDRSVRLAWIEMAQMAT  
NLSFLKHLRGNVIATALFIRAEEEGRDETGVLPSSRYDLDTATWNEDSGQVYLR LVAK  
EADHDGRRKTKEVRVIKVTASQMPPLPRAGLPSQQRRIVLYHQTIVPRERGYV PMLPLV

ENFTGATHIILAAFHINGRPGNITLNDPPDSSIYSPLWEEVPQIQRTGIKVMGMLGGAAQ  
GSFQRDLGLQEEFEAYYAPLLAIVRRYGLDGLDLVVEEAMSLRGIVRLIDRLKADLGDA  
FIITLAPVAAAALVDLGNLSGFNYWELERSRGSKISWYNAQFYNGWGQAEPRIYATIISR  
GWPPSKVLLGLLTNPNGSQGYVASENIGPVIAFLTLQFPDFGGVMGWEYFNALPGGLE  
EPWQWAAEMSLSMGMAQVLSTAQMVGAMGALREGLMGFLSNIQNQRQQ

>8759\_t gene=8759\_g

MIAIPLSSSAVFQRAAAGSSTIDTRWLLESVGVIAFAWYLLVVFVCTLGYLQIWRLYSNA  
PPRSKSASSSDAPHVTTIRPVKGIPEYLYECLASTLRQDYPRDKLTTCICVSTRADPAFPIL  
EKLVEDFSGQCDVRIYVEEEDPLLQEESTYPMGPNPKIRNMSRAYREAKGDVIWIIDCNV  
WVGRGVCGRMVDKLCGYGGKRYKFVHHLPIAVNVDPEDAEMKPLLAAHGHGVHKVVG  
ADRTDSVLKEGGGRLEELFLSSSHAKMYTAINTVSIAPCIVGKSNMFRKSHLSDLTESPG  
TAPVQGPARNPGIDWVSDQLCEDHIIGDWLWRNKVREEKESRKSLSGKHGMVFGDYAFQ  
PVANMSVKAYIARRVRWLRVRKYTVLAATLVEPGTESIVCSLYGAFGMSTVVAKYLES  
RGYTDLSTYLQQWPTFFLLWATSIFIWC MIDWTLYLKLSHGATVEIDQNTPPFARPLKTS  
SKNKTSRRPFLQWLAAWTVRESLAFPIWFWAVYGGSTVTWRNRSFQVSLWDTKAREV  
NHSVQQPGILRNVDSSYSNGSSLDVGRSSSSSSSSSFFIAERNKIRND

>8782\_t gene=8782\_g

MEKEGKIQFIANWRTRAHGHHTKDAAGDDKTDYARWRLHDNDGRLTWRYLENDEEN  
EKWPQTFYDKYNLGLPTGAPKLPKASTPRESAANGLEFFSKLQMPTGHWACEYGGPLFL  
LPGFVITWYVTNTPIPPEYAVEIKRYLFARQNPVDGGWGLHIEGHSSAFGTMNYVILRI  
LGASEEDPRMIKARGLAHLKLGALYTPHWAKVWLSTLGVMDWSCVNPVPELWLLPD  
WVPIAPWRWWIHRMVFLPMSFLWSKKWVFPQNELTRQLRNEIYTQPYESINFASHRNSI  
AKEDNYYPKTMILNVINSLLVNLWTPVLRFSALVKKAEWVWEMIEMEDKNTDYAGL  
APVSNPLNLVCCYIHDGEGSESVRKHRETLHEYLWMKNEGMLCNGTNGVQVWDFAFV  
TQAVSVAGFAENPKWRPMLTKALEFLDNHQLRENVPNQDKCYRQHRKGAWPFSNKDQ  
GYTVSDCTAEGRLSVLQLQEMYGYPKLVSADRLKDSVDCLLMQNDTGGFSEYESRRG  
SPHLELLNAAEVFGGIMISYDHVECTTASITALSLFSRFPDYRVDEIKAAKHKA VEYIKR  
IQKPDGSWYGNWGICFTYAAMFALESLSIGETYNKSEYSRRGCEFLSKQKEDGGWGE  
SYLSSELHVYTDHEMSQVVQTAWACLALMEAEYDPPEPIRRGMKLLMSRQQANGEWL  
QEAIEGVFNMSCMISYPNYKIFYWPIRALGLFSQKFGNEALI

>8793\_t gene=8793\_g

MNIYTLFVFTLIDHVTAAMPKFVFAHFIVGNAASLTQEQWESEIKLAKHSLIDGFALNIA  
QQDTNTDDILQKAYAAAGKVGKFSFLSFDYLSGGPWPVERVIDTINKYKELPAQFFYD  
DKPLVSTFEVGVANIDDWPTIRSKSDCFVMPDWTSLSQRFAEVRQNVNGFFSWDAWPV  
GTGDKTIDSDRIWRNATHGRPYMMPVSPWFYTNLPQWNKNWLWKGALWYRWEQI  
YRFQPDFVQIISWNDYGESHYIGPVHVDGIPQGAARYVENNSHDAWRELLPYFIASYKL  
GDRSRIHISRDTLVYWRPNPNHSGSNGGTTGNCPPQQQAMDPASLAEDKIYI AVLIKE  
PSWIGVRIGSNNNITSFYAQQAGLSTFEVFPNGQTGDTTFWIIRNKTEVAYTKGPAITTDC  
VDGMVNWNAVVGSS

>8801\_t gene=8801\_g

MKFSTLAVAGAFLASTALASVDEIVIKGSKFFYKTNGTQFYIRGVAYQEPTTSTTSFIDPL  
ANLSSCARDIPYLTAIRTNAIRVYGVDPNTDHSACVNAFADADIYMIIDLGSPTDSINRAD  
PTWELPLYQRYTAVIDAFANYTNVIGFFAGNEVTNNDSTYQASAFVKA AVRDSKAYIKQ  
KGYNKGVGATADAADIRTQVADYFNCNSADESVDFYGDNVYEWCGNSSFTESGYDQ



IVKNFTSYSVPYFFAEYGCNTVKPRTFTNIDTMYGPD MENMLNGGFVYEFDEANDYG  
LVSLV GSSISTKSDYSAFSTEIVSATPTGINSASYVTNTALQACPTVDSLWKASSTLPPTP  
DEDLNCNMAKSLTCVVSSSVSSSDYGNLFDLLYGFVSDYVSGISTNATSGVYGAYSMC  
EPKDQLSWALNAYYSAQAAKNGANACDFSSSATTQSATTSGSACSTKLA AVGTAGTG  
TASGSTATGTGSSSSSSGAAPGASPSAVFVGSWQLSAYILTA VLSSGGAMLFL

>8808\_t gene=8808\_g

MSEYISQVCVECAQILSTVPPSVFLISLAAGIIGLVALVYTFLFAVAFRPRAPFPPEEKTYRT  
LSE DGTPTGPQQLPCWQNSWELERQNTNKGAVFDIEKPELFMSVVVPAYNEEERLIGML  
EETVDYLEHAYGTLADQATNEQVKDKTKNDSVRQRKTGNGHVADNDSSKGWEILLVS  
DGSTDRTEEVAFEFARDHQLTLHPRAHTGPWTS DKREGVHIPPGSIRIVTLTQNRGKGGGA  
VTHGMRHVRGKYVVFADADGASKFSDLGKLV TAAQKVEDSEGRAVVVGSRAH MVGS  
EAVVKRSKLRNFLMHSFHLILWLLTPPATAKVKDTQCGFKLFSRASLPYIIPYMHSEGWI  
FDVEMMLAEFANIPVAEVAVGWREVKGSKLNVVWDSIGMAWGLFILRASWGMGVY  
RRT

>8836\_t gene=8836\_g

MRRSTVLTLSSSLALTQAKPLPLEQRNTVLNEFLSDLLEYLPAIDTTIEDAASIITDLDI  
LLADIIGAKTTENQLTSGGSCAEYTLIFARGTSEPGNMGVLVGPPLVWALQAVVGTSGLT  
IQGVNDYSASVDGYLEGGDPSGSSN MASLISEAYSSCPNTKLI AAGYSQGCQVTHNAIAK  
LDAKTASWIDKVLLFGDPDDGQAIPNVHASNVYTVCHSGDDICLNGLILVPHLTYAEN  
VAAAAAWATA

>8848\_t gene=8848\_g

MPFADLTIGAKICLLFKIIGIVIPAAATYNVIRAMLRAWLQHLPMGAAVINATARSFISYIPA  
HYLQTL PSTIDTYIRWTSSASNEPRIQILDDEKTHLLWLGPIGADK VILFFHGGGYVMPLS  
EGHLDWMNHTLQKCN EFLNISVAILEYDLVPRQRYPRQMIQAISALKAVLACGYSPGD  
ILIGGDSAGGHLALSLLSHLHHPRELDLSISLETHLRGCFVVSPLLSLNSLTTRS YRQRFS  
VDLSYKTIREWGDY LIDYSTWREETRKSLGWGMALDVPESWWQDLRIVDHILVTGGH  
EELFRDHIIQFVDVLR RKSSANLTAYIAIDEAHDGPLMDFRAHRQPGTSANKVTEWIISTL  
SSKLDQ

>8857\_t gene=8857\_g

MAQTLSGTAQVYLVNVTGPT EYLASGILLGLPLNDTQIPDSLLSEFGFNKIRTGGSQLPAP  
SRGWTHGELTGRYESLKADWDTLQRHGGGT FQIMIHD MWGTDSWPSLDATPMPGDNG  
SYVDFDNFLDTL FALIIEDDIVDNVYWDMWNEVDNVGFVDRGLDRWLEYWGHATHKI  
WNEFPNAKVTGPSYGHLPNFAGSAIDWFTEWAQFIQQNQSIPDIMS LHFLYPNGDLELSI  
TTWQGILSAAGVDYQGTWNVQEYGNPDQLYPSGAAWNIAQLERMNAPGLRANWMDG  
FPLHDY AANLLSKPLSGDNYVENATGYYPAREFPVYSYRQKMQGTRVQTVMTNNTLS  
DAYAVVCESDRTLRVL SGTRPANGTWEIQINSLSSLGLPTSGSVQTRVIQFNSASTVFDSV  
DSPIDEGLATWYYGDDYIVWTIFQDDPELTWAFEISY

>8873\_t gene=8873\_g

MSLGLFSTTHDDL SLETVRYDYDLSDVQGTAMGW HREERVLMCTPLRDAQAHLPMFFSH  
LRNLTYPHHLIDL AFLVSDSKDNTLSLSSLLTELQND EDPKMPFGEISVIEKDFGQQVNQ  
DVESRHGF AAQASRRK LMAQARNWLLSATLRPTH SWVYWRDADVETAPFTILEDLMR  
HNKDVIVPNVWRPLPDWLGGEQPYDLNSWQESETALALADSLDEDAVIVEGYAEYAT  
WRPHLAYLRDPYGD PDMELEIDGVGGVSILAKAKVFRSGVHFPAFSFEKHAETEAFGKM  
AKRMQYSVVGLPHYTIWHL YEPSVDDL RHMEEME QERKQREAKEKEEKAE AERQQL

KDRFKDSTDEWEKDGAAVKKKIDKLEHTQQDEKVGKAQPKAAAIEEAESDLEKERRPA  
VPAKGEKEAGAGTGSKDSKSNTOKEKTQQDSSSNPKEKLQ

>8886\_t gene=8886\_g

MAIQEGATNARRDEFPAALKGKRILLATESLGPVNGVSRTTGMLIEYLRANGVDLAVVA  
PRYEVKDQPQSKPTKTPSHARSGSEVRLHGYPLPYNPDLTVVYPFRFDRVCSRTFQPD  
VYLASPASVGYQFLWQIRQLQKPPVLLNYQTDLAAYSSILLPGAMGRFGTWLVNRVQ  
GFLFNHPSVETIFYPCSDVRSYLEEAGAPSNRLVQLGRGVDTVTFNPRHRDEAYRRQLAP  
KGEIILAYTCRLAPEKGFELANAAIRLEKEGLAYKLLIVGGNRNPAVEADVRLKLFEPVR  
DRVIFTGFLGGENLARAYAAADLFLHCSITETFGLVVLESMASGVPVIARNQGGPSDIVK  
HGKTGYLVAPDDLDEFVRLTLKVSQSDLRQNLAVNARAFADETTWEKINRRVAWHIL  
EGLNHSRRIEQKRAQRPIRNWISTQYSEFETHIWWPLIEQLRVNAAIAFVFFMWMIAVIP  
LILHGSRMFHFVQTIPLMFQQAQSNRLLR

>8891\_t gene=8891\_g

MSANSGRDADKAQGYIAALDNARSEDKWSVPELIRKVTKHAPHRKCLIQTAHAEIQV  
VAHITKTRPATAKGTTPNHVSNLSELIPELIAAIEAADGTPQDVFQAQVCLGWIHWLTS  
EPGLAVVRLPKELDDTTIASLSEGGKGLTKWTEVCIVKAGYIKSAAQALISTPDAALETA  
STVLPRLAIPNPSLASCPQALYWSEIFLSKLAMLASEKVISNDAGNYDFEIJETALRAFRLW  
SGHPYIKGRDIAASQRGIQSGSSHHTDSQSSIWMAYYRLLSLILQYGLSYFPLSPGSPRRQ  
LATEIRRVETVCESVLLRETKFPLASDSNPQVEAWTEDVISNWEVLCGPSWRDDDLGEG  
GQDAISRNVDILYRASTKYHSHSILRRLFHVHASLAEFDLAMKALNTYVEIVVSAKDR  
AEKAAEIGHLESDEILLQTVSEGVLLCCFGSEEEARKAKELITILEKYIEKDIADDLNSTN  
GQGEEASRVPSHVIALAYRAIGLGNWSRWTPTTEVRNDIRAEAIENLERSIAPEFESEY  
DLSSRYALALLLAESRDLGAIHVKTALTPRDGSTLSGPGPMPELHHLGERDKISLWH  
LLALLLSAKQEFDIAGRTCEAAFDQLPSSVTIPGHTNRHINRDSNRNQGLSAKNKDFIRHL  
QGREKERIETRMTOQLALLEITDGPEVAVNHSDNLLGLFAALFEDLELEVSKEEVSQLOQ  
QHLGPPKSSAGTIKFRGSIFGRKKGSKVPDRSLNVSDTIPSLPNEASSVGADAPTIMVTP  
TAIKTQNSQIEKQNGTIDSIDAPQTEKGDIDAEIAIGIAISDPGILPTSPKGPRESAKHSLPA  
VAHNLNPKHEPCVGHIDQPPEQDVRLRTPHRFSSPTKALTKFPVLQAQKHAISVLVKV  
WLLISGMYRRASLYDDALEACEEASKQVEAFEALVAAEESFARAFVNPVWGVAKSAEA  
LWADVHAKEGALSEAQSLTHEAMQYEEAISCFPDHPKATIALSNLLDAAWEEKIPLEP  
VEPRIDSDIVGPLTSGSETSPEATQANGVIKTLRTPNGVSNTPSKAPSNTNEPEYISRLAAR  
DRAYGLVSMMLTKTGSSWDNSEAWFTLSRAYEAGSQIQKAKEILWWCIELEDKPIRHW  
WNLGAGGYVL

>8901\_t gene=8901\_g

MASSVPEAANALKVKGNATAFAKHDWPTAIDFYTQAIEQYDKEPSFFSNRAQAYIKMESY  
GYAIADATKALELDPTNVKAYWRRALANTAILNPRAALKDFKSVIKREPNNQTAKLRLT  
ECEKLVRMDFEKAIEVAEPPSAFEDLDIDAITVEDAYDGVRLDKEMTQEFIDDMIERFK  
NGKKIHRKYAFQIVKNVLDIVKAEPTMVEVGVVEEGTKLTICGDTHGQYFDLLEIFRLNGF  
PSDTHAYLFNGDFVDRGSWSTEIALLLYAYKWLRPNKFFLNRRGNHETDDMNKVYGFEG  
ECKAKYNEHVFKVSEFSALPLATLVGSKYFVLHGGLFSDDNTLDDIRKLNHRNQRRQ  
PGQSGLMMEMLWTDPPQTPGRGPKRGVGLQFGPDVTKRFCERNGLEAVIRSHVVRMG  
GYEVEHDGRCITVFSAPKYCDTTENKAYINVGPELKLEYHVFEAVPHPDIKPMAYAQN  
SLMSMM

>8925\_t gene=8925\_g

MESIFRSIRSQIADMRLNAVTFALLASHATARCPYSERAAAPAAGCPYAKQAAKRDVM  
HAPARRQAIADKKGIFYMNRIGPSGSTLYIANADGSDAKELMPNQTNPFDYHASWSPDN  
QWIVFTSERRALGQSDLYRIKPDGTLNLQTLVQTDSDVEDAGALSPDSTLVAYVSTAGNYT  
ANIWVTNLKTGVATNLDTALTRSSNIYPSGHFRPSFSPDGHWIAFSSDRNTDWTGHSNG  
TGWEHTQSLGIYLIRPDGTDLRLLVNQTYSLGSPVWSSDGSIAAYTNISTEDTYAHGV  
SEEQAAVSSQVYSIDVASGKNIVAETSGDYLVKVSQHYIGQTKNIGYVLKGGIPAEGIAYT  
APDSKHKAFNLTSLRNPSWSPDGTKVVVEVPNFTQIPGETELFSFDADWEYRYMDVFPT  
FNNVSNLMAVTEKVLGGANGSVVTSSPQYTDLVDALDSYDIYSLDNSTEVLWLLEGQA  
GAFQPSFNPEGTELLVGFGAWFLTRTEAGATIYRFDANGSSFTNLTSEDNTQNAGFPSWS  
PDGSAMVYRLWDMESGAPKGLQIFNFTTGETTALTTGWDNTPGWSPDGKRIVFTRNGN  
WTVEYGARWYADRFDVYTIRTDGTELTVQTDSLANDAHAHVWSADGRILWSTGMWGF  
KDESHLSDNTFQPYGQMMIMDYDGSNKQLLTDTIWEDSMPLYMPNEYLG

>8940\_t gene=8940\_g

MWRRTYLLLLLIRIYFALSPPSYVHPDEHFQSLEVFAGRIYSYPSQLTWEFTSDNPIRSVFPL  
WPAYGLPMNLVKWFYNETGLGSSPPPELIYYILRGGMFILSFVLEDWAVYELVPTPRYR  
VPTVVFVASSYVTWYQTHTFNSLETLLVTWGLVLIQRIVENRKRSAFFSPAFLSLVVV  
LGVFNRTFPAFLIPGLQLVPHFIQKPFSAVLGCGSFFAAIAILDTIFYRSSSFIESIRHP  
VITPLNLIYNSNSLNLADHGLHPFYHHFLVNLPLQIGPALVVLVLSLFMKPTIRSSTFYN  
RRAIAAISGTMILSAIPHQEPRFLLPCVPLLLTCIRPLKTRPFLVSWIAFNAILGFLMGVYH  
QGGVVPTQLAMPSSISSVMAQHTQTDNMNVTVFWWKTYSPLWLLGDNSELQADIQTH  
DLMGMRGPDVIKQIDNLVPGCPSLLSSSQKNSNLVFLVAPRSATFLDTYTFASAPDITLH  
MTEQWYTYTNHLNLDMDDFGDDGFISTIKRVVGRRLTVWSVERIGCV

>8994\_t gene=8994\_g

MQRRPSKRQONAPESDPKTPQIEIQKQKQKPKLISYTLVFLAVVCILPFLAT  
LVLFVRFYYESNNDGNVGRLESSEHEHEHVSTLTLGFDNRIYENGQLRPNHVYRETTT  
QTLNWSITAGQRRPDGVDKRVYLVNGLFPGPLIEARSGDTLNILVNDLEDEQLSLHWH  
GLNMRDANTMDGAIGVTQCGIYPGQSFWYNFTISETQSGTFWYHAHSTVQRADGLYGG  
LIVHRPVIARPPSPNVRGLLIKHRELKGEEDDESSVPDSLKYTYDKEIFLMVGDWYHR  
TAKDVASWYLLWWSRGYEPVPSLLVNGAGRFDCSRAVPARPVNCIGEASERPPILLDG  
ESSYRIRAVNTGSLTGITLGFAPGTSIEVITLDGGNPVEVNPIDDGKSSVGILFPGQRVDFV  
LRPVTDNSTFMVTKLDESDFKIGNPALVTHQSFLLQTPSSQTSLSSTIQDNPNINTE  
MIDINKLPSTPTLLFHLPPKASQTHIVYAKVEKLSRLNNIPYGFFNRRTTWSVQSEPPYPL  
GLPRNQWQDKNQLAVSTGQEGGWVLLVNNLDEGAHPFHFGHNFYVAVYESPAGSS  
RWGSYNPWTANNSGGNEDPYDLTKAVLRDVTQIPRRGYAVLRFKADNPGVWLFHCHV  
MWHLAGGMAMLIDSGSGSDIAHEPWLGAKGMECRV

>8996\_t gene=8996\_g

MNPSTPSRGQVNGQYVEPYDELPPAYYGDEGSTISSPFQNDAGASATMRLPTGYDNE  
DIDGSSDLGTNAARFRMGQTSSTRRTYVDDSEDPNDKRIKLNISIPPLVPHHKEPSPEAV  
ACAVSQDPCRCKPVAALPHTPTSKKNTPSIRKVAQTYGSKKSIIPPLFAKIPKSRLPDET  
KPKAETLDLSMIEHRANMVLNSANPSPTRSTPNRVPVFRPRQNSVASSIGHTPSIPPAAS  
VVDSPQYSSRPGSPTRPWTPSRASRRGANSSISGVSYEPADLNGSPRPGTPSSAYGGS  
RPLPPAPLFSGPSASSGETSIDIGDARSAEDPFGGDGQTDIPRRSYDSFRSESTMTDEKEN  
MVKIDLDEVHDEGDDTEMLVDSNIHYGPAPEGKQSRRGVRSQAQMSKKEVQLINGELV  
LECKIPTILHSFLPRRDEREFTHMRYTAVTCDPDEFKERGYKLRQINIGSTMRETELFCVT

MYNENEVLFTRTMHGIMRNISHFCSRAKSRTWGKDGWQKIVVCIISDGRAKVHKRTLD  
ALAAMGVYQGGIAKNVNVNQKEVTAHVYEYTTQVSLSDLKFKGAEKGIVPCQVIFCLK  
EKNQKLNHRWFFNAFGRMLDPNVCILLDVGTQPAPTALYHLWKAFDQDSNVAGAA  
GEIAGKGKHYLGLLNPLVASQNFYKMSNILDKPLESVFGYITVLPGALSAYRYALQN  
NEDGHGPLSQYFKGETLQGKDADVFTANMYLAEDRILCWELVAKRGERWVLKFKVSA  
VGETDVPDSLPEFISQRRRWLNGAFFAAVFLANMRQIWETDHTLTRKILLHIEFVYQFF  
QLVFTYFGLANFYLAFYFIAGSLSNPDIDPFGHNMGKYIFDVLRYACVLLMALQFILSMG  
NRPQGARKMFLFGMIVYSIIMLYTSFATIYLIVDKLKGDLGSLSGNDLSNIIVSLMSTLGL  
YIFTSLMYLDPWHLITSSGAYFLLLPSYICTLQVYAFCNTHDVSWGTKGDNVHHMDLGA  
AKGLGGSKVVMEMPTEQLDIDSGYDEALRNLDRIEEPEPPVSEGQLQEDDYRAVRTY  
MVISWMVANALLAMIVSEAYGTESGANNIYLAILWSVAALAAAFRAIGSTTFAILNLVHK  
IAEGRMKFQAGSLGQKLRKAGGGGSVAGSSRYGGSASIRDLISESGWNIKRKARKLMF  
WRK

>8998\_t gene=8998\_g

MVLKVGIIIGAGEVAQVIHLPTLTLLSHLYQIISICDISLPVAQHCASKFHIPSATSDPHEIITD  
PAVDVVFILTSDEFHAEYTIAALAAGKNVMVEKPLTSLPAAQRHHAERESKGRVFGY  
MRRYAPSFTGAFLREVASIPKVLARVRDMSGPNAFFVNQSGTFQVRPDRDIPASAGQ  
ERDRLLAELYREAFPGTDNVTDEMCKYCRFLGSLGSHDLISMREALGGVVDSEIEGVSVN  
DPFYSAIFTFPSTSAAGGKFSVTYESGIDTIPDFDAHLSIYGSNKRVSIQYDSPYVKGLPIK  
VRVEEVNEYGEKQVREILSSYEDAYTAELTEMYECFVDGREIKTSAADAVEDLKLYDA  
MYRKAGFITR

>9036\_t gene=9036\_g

MSPSTENAIQHFTINDFKFQDGTILPQVQLAYREVNPTKTKIALIPTCFRGRINSTLNAD  
GALRGYRVIVVALFGNGESSSPNTPNFPQTLDYRDCVRAQHKLKEHLQLTQIDVMVG  
FSMGGQCAHWATMHPNMILNAVIICSSAKTSLHNYQFLEGPKAALQSSVDYVDGKFR  
TNRDSPPLHGLHAFGRAYSAWLTSAEWFEQRLFQKQYKSLDDWAAA VAGTNYNDW  
YPDDL VMLGMWQRSDIGVTAGSRTDENVISVSEALGRLSARCLL MPCQTDQYFTWQV  
SEREAKQIKRAEVAVIPSIWGHVAGGGANQEDSDWMDRRIALFLSQED

>7647\_t gene=7647\_g

MPSLLNLVTLALVASPAVATSSYNLLYKFDETNFFQNFYSYSDSDPTGGYVQYLDYDA  
AKTAGLAKIQSNGNVYLGVDHTNTYTTGGRPSTRVTSDIQFDQGLLIADIAHMPGNACG  
VWPAFWTTGSNWPADGEIDIIIEGINKQKNTQVALHTLNSCDISTTASELTGDLTATACST  
SVGAGGCTVQGTGDSYGDDFNDLNGGVYAVELTSDAIKVVFFSRANIPACIASGHPTDS  
SFGTPMAVFQGSDFEKDFTAQQIIFNTDFCGDWAGYSYASSCPLTDGLSAISSCEAYVG  
SNPSAFTEAYWEIVSVALYQKGSAAVSSVAPTTAATSTAATSTAATSTAATSTAPATVPT  
SAPSSVPTTAPSSAPTAPTSTGSALSTSSPARLSPSGPSSRPVAPSASAGTSGSGSGSGS  
GSGSGSGSGSGSGTGTGSGSGIVGSSARVSPAKTSCSSKSTITVTSKVAPTSSAPVVPTTSP  
CSSKSTMTVTSFTSPTPSVQAVSPDSSKLT TTTTIVIVTSYVDVCPTGYTTKTTITQVTYCPA  
DVTSSSIAPAF TTTT KLCTSGCAPSPTTVVVVVPVETSTTPAKPIGTALVSGGSPASGSGTT  
ILPALAVSAPGTSPSQTSVSTAVSPVRTGIYSTGGLVPVAPSSTSGPASAKPSSSLPGNGSV  
TTTGVSPAFTGAGSRITPSAVGFLAAVAGFVLF

>7662\_t gene=7662\_g

MAIRSTLSNYIGLAVIFAYGVRADAPGPTACTNLTSILGSSIVNSNTLSSAYIESRTDYWN  
TLQDVYEPSCVVYPSSAQDVSRTLQAVRAAGSRFAVKAGGHNPNTFFSSVDAGVLIDL

SMTGMSYDPDPTTLATYEPGSLFGDLYDYVYVQYNRTVVGARLAGVGTGLALGGGLSYLS  
PQYGMACDSFRELEIVLPSGEIVIASNTSEYSDLFFASRGGGGNAYGVVTKYTVQSRPIGE  
LYAGNIIYLFQVDAVASAIQNFQYNEDPKASIIIGTFEILGTPDLGLDLQAVIMFLVYD  
GTDPGDAFANFTSIPYLLNLMGNKTYPEVANMPIMSTELSRGENIFRVGVHRIGDGGYE  
AALNTWRTWAEDNKGSYILTSLDFQPIPLSLTEASRSQGGNAMQMPDGPWFVWNYLISS  
NPLLTRSEYDAVQASFRDMVASVSNAEGLPLFINDANKDQIPLTTFSTYSTLQKQKQYD  
PDDFFSNYTGGSFSD

>7679\_t gene=7679\_g

MLLVLLFLVYVYVYPPFWIIQHCQRRWPDVLWHVSTSEKVIALTIDDGPSIYTAIEILEILK  
ANDATATFFIIGSHVSNMAHEGHEILQELIRGGNELGNHAMYDEPAYKLPDDELVSQINK  
VDEINRKAYEAVNGASTFVADGTAFPYRPGSGWYTTRMRNIVNRLRYKLVIGDVYP  
HDPQIPFAKVNAAHILRMARPGGIIICHDGRAWTLPLMAVLPELKRRGYRVVTVTELL  
QCANS

>7680\_t gene=7680\_g

MRLFRRQYLGLVPVAALVFIFGTIYSTHSWTSTQQLNKDRWSQRPGDQETQQLHDGQN  
YDDPGCADFPRDLRDVQIVLRIGSTQPFQISSHINNITNCISNLIVISDRVEEISNGFWSH  
DIIADLPKVYWEGIDQDDDDTDQTAGLKAYADINKGDSSWKQGHASDRLTHRQGWL  
LDRFKFLPMVEYAYNVNPQAKWFYFIEADTYVVDLFRLLDRYDFKREWYMGSPSP  
GRELDGEKTWFAYGGNGFILSRTAIQRLVSKDLVKSTDESSNANRTELSLTERWVDLVK  
SDCCGDSVLGFALAKKGVFLSGLYPIFNPHSLHGIPFGPSGKPYWCQPVLSLHKTWPGDV  
PGLTHFVKDHSGRPLIYADLFNYLGLEQVAQRDDWQNSDWNGFEEAPESPVHENIEAC  
AAGCHAHGECFQWTYWTETSWKYKSIPKKKCTFVRSIRLGTHKDREDLWTTTAVWTS  
GWDIEKISKWAKDNVCGEPEWVEPSLQRIY

>7689\_t gene=7689\_g

MSATKPTAAAVHSAIRLLIENLVNIKDDTGKFLLYLDDGRVIDTKSWAGWEWTHIGLY  
GVWKYYEITGHESLLKIIEDWFAARFAEGGTTKNINTMAVFLTLAYVYEKTGNVAYLP  
WLDSWAEWAMYELPRTKYGGMQHITYNSINSEQLWDDTLMMTVLPLAKIGKLLGRPE  
YVAEAKKQFLLHIKYLFDPRGTGLFFHGWFEKGENGGHNFAQALWARGNSWLTIWIPEIL  
ELLDLFDINDPIRLHLIHTLDAQCGALKQFQHPSGYWRTLIDQADEGSYVEASATAGFAYG  
MLKGQRKRYIGSEYRETAEKAIQAVLGAIDSNLQNTSFGTAMGHNLDFYREIPITSMY  
YQQAMAIMALVEYLRTYI

>7774\_t gene=7774\_g

MSQGRNEIIFWYVLLSVILPNKMKWFNVVSAGLMVWTVVSATPTPGKPHEGEGSGPYP  
AYYFSEPTLENHTIYMPKNPPDDISLPVLVWAEGGCDNNGTQFANFLTNIASYGFVVA  
NGPINGSGFDVENPQYLQDSVLWISAKAGTCGKYKNVDASKIAAAGQSCGGLEAYTMR  
NDSRVSYLGFNSGFLSVVPAGALPSNIVVEPPSTIHQVHKPVFYFLGGPTDIAYPQGEAD  
YHNLTVGPKWIGNYPVGHTGTYSEVNGGAFGVA AVNWLTWIFKDNTTAAKFFTEGGA  
DRAGWNATESFDLQDLLKY

>7778\_t gene=7778\_g

MYSSRLSTCFAFIATLAQIAKSQTVTITNGTINGINDPVNNVQRFLGIPYAQPPVGNLRLH  
QSIPLLESSFGTLNATAFGPACYGKNNPDPSDELTLNIWRPSNASSRAKDTLLPVLVWLY  
GGGLSSGYTADPRFEGTNLVRISTEINKPVIFVSVNYRLGPLGFLNGKQMYDLGLLNLM  
LDQRLALHWIQENIKAFGGDPRKVTLAGESAGAVSIYSHMMAYGGRDDGLFRGAIMES  
GGAFPLTGPDPAPFQETFDLSLNTTCVSVANASAVIQLDCIRGLPISVFLGSGVGSSTGQSI

DGSFTQTSIQFALSAGKYVKVATIVGSNTDEGTTSAPTAINTTEQLWGPLSQEYFRPKTLP  
NSTVETLLNLYPTDPRLGCPYNTGDVKLTSGLDKQACSIFGDIVQVGPARIAREIAKH  
NGNVPVYRFRDQLPHNTSSLAKGITGLEQNYVFSNLVADFPWDQALAREITSVWVSF  
AYSLDAPNPGQDSMLPYWLEYMHGGQSIVFNAYGSIHETDDYRREGIDYIIKNVLPYGAQ  
>7790\_t gene=7790\_g

MLLFNLLSFTLLVSLVASTTFSPFFSLHKRCTNSADDRSCWGDYDISTNYYDESPDTGVV  
REYWWEIVNTTAAPDGIERILSVNGSVPGPTIADWGDTVAVHVTNKLVNNGTGIHFHG  
IRQNYTNQNDGVPSKATQYGSSWYHSHYYVQAWDGVAGGILINGPATADYDEDLGVL  
FLSDWMHETADQEVIASAEENGPPTLNGLINGTNQYNDTTTGTVTGSRFETTFVADTRY  
RIRLVNGAADSHFRFSIDNHTLEVISADFPVIVPYATEYVDISMGRYDVIVTANATDN  
YWMRATIVQACSENDSPDNVLGIVRYDNTSTADPTSAAWSDALAADATCADEDVSNLV  
PYVALDAAEDPTNTTDFTVLYQSGGIGLWEMGAKSFVNQWDYPSLMQIDQGNNTWG  
TSQNVYTYPEANEWAYMVIQTSNQQPHPMHMHGHDFVVGQGDGTFDATTADLSYTN  
PPRRDVMMLPADGYVVIAFYTDNPGVWLMHCHIAWHTTEGLAIQILERESEITVSSILPR  
>7791\_t gene=7791\_g

MRTGPLATNGIDAGVKIRPTENELAQMCSWPTPDFKRGWDSYFKHKSQPMHYFVIA  
GDSLSFPGHEQYGTQGRKLSFKYGVVDERLNVHGVGLKVVDSLICPDNVGCENFTTAL  
LIGEQAAMTAEDLGYSGSVMDMKVPTYHAPGGL  
>7804\_t gene=7804\_g

MNPIIPGFAPDPSAVRVGDYFLVNSSFHIFGLPIYASRDLSVSKHIGNAINRQSQLSLAL  
TRTKINLEEGGSFMCAGGLYAPTIRHYAGRFYVICTNVIHAGEQEGTHQNFIIVSTADIW  
GDQWSDPVFFDFDGIDTSILWDDDGRSYMHGSAAPGPMTTINLFEIDVDTGKKSDEKII  
WRGTGGIWPEGPHIYKDDGWYYLVISEGGTFEDHMITVARSKSVWGPYEANPHNPILT  
ARGTDEYVQHTGHSDFQDSQSNWWAVCLGVRKDRSKRYVMGRETFLTSIEWPTGSWP  
RVNQVKIGLPSDLTTTLPGTVSSLSATPNVDWCYIRDADLSKHKIVENGREIVLTADEND  
LSQASPENRVTFVQKRQRQLEGHSQVAVQNVSPGTQVNAGLCVYKDEYRFARIYLEFG  
TPAIVLEFVNKAKSIDKSKKIAVDLKDAAATTWFRTEYLESYKFSYRLQQDSPWIDFGDL  
DTLELTGHDFVGPVIGIFASTKPMNGRTDIKFEMLEIE

>7805\_t gene=7805\_g  
MPSFLRYLYLKVLTFSRVLIKLLGPPLKPRPDDVIQIASRDKRRTIKAHVYKPHTTNTGS  
SNAAPILINLYGSLAIPLHGMDDDFCRFVADATGYVVLDVNYCLAPEYPPAALNDVE  
DAVKYVIDHPKEHDASKISICGFSSGGTLALAAASTTLPRGTFQSLIAFYPATNLFQDPSL  
RRAPVPGGTDRSPFWTRIFRESYLRGMDPRDPRISPAFADTSNLPANMLVVTGELDQSAV  
EAEELAERAKNEGHAATGREVIIRRMKGCGHAFDKKLAGEFVAACKDESYQLAVEMLKK  
ARK

>7845\_t gene=7845\_g  
MISTYTNPIIPGFNPDPICRVGSDYFLVTSTFEYFPGLPIYHSDLLNWTLIGHVLTRRSQ  
DMRTTEPSGGIWAPTIRYHKGTIFYVSTGCTQFRPKEDIVIPRGFYVTTTDIWTADSW  
DPIYFDVPGIDQDLFFDDDGKVYFSAVNQITDPSIPKHALGLATFTAIDIKTGHCLSSLK  
WNCLSNFGIGIAEGPHIFKHGGYLYLSTAEGGTDEGHQQWIRRSKFGPYGPWEEGPQEA  
NPVIYNGDDPQVRNTGHLDFIEREDGSWFAVFLGVRPQGEDSSLLSSIGRETFLAPVQW  
DGWPIVNSRRRIGLQMPMDGLQTEQKLVRSWRDDFQSAQLELGWYHLRTPKKEYSLK  
DNPASLSLYGGAYRIFDSECPMSLLRKQAHFSVDWRVGLRFSPENINEEAGTAIWWWSQF  
AYASIGIRRGESGLEIAFRGYDEHADAFQENKSTILSSIEIKLLIRARPTKYELLFSPSSST

VG TGNEYTKLGEITTSALTVRRSGKESPNTGSHFAIYAQGGFGKPKLPAVFTFAEWK  
VE

>7852\_t gene=7852\_g

MWPKSILSLAVVLGGVPLAFSNNPPGVNIWCGKAYEASNDSFNPGGCFEEPSKSSIPL  
NLKVRPRMNIYLEDSDSQSLLIDAAISYLTGEPLPSVATLSQNSERFSLFLVITSGGASHISH  
HQSVAVGSSDNEIPITFDKLPQMTPYNISVVGTLSHGNKTTFSATTELYRLPQRTDGGG  
VTRLDHLYGGLSVIKGSQTEWKPLFPYTYVQWSLYWYANISTLDEFAAKGYNVIHIVP  
TGDLGDTFPWFDEFEPYLQRADELGLFFQYDVRWDYSNLTTMIDQVTRLRSHPSILLWY  
TGDEPDGKSNPLNSTAIAYETIRELDLYHPVSLALNCYDFYYQNYASGADIILSDVYPIST  
NTSWSTVYNTPCNETYGCCGDDCNGRFEDISDRLDNFAYYDEIIGWPKTHWGAPQAF  
GNETFWTRYPTAAEEVMTMISINHAAGIVMWFPTSPDILGVTDALAAVLTTEEVAG  
FLIGSPIAQNLTGGERVDAAAWIQNKLLLSILNLNYEELTGEISVSLPGEISAKSITST  
LWGDSAWKISGDKLTSSGLAGLAVSILVIELR

>7853\_t gene=7853\_g

MRLDTQTSLVFGLALATAVQGALDLVSQSTPVSLESYFNNKAFGSYPGYAAFDALNESY  
PDPSIHINGTYTSKSTGIVYDFPGLQPASAPDNVICEGQTIAVPSSEYFSASILVSSDVELST  
VSGNITYIYSDNSTLISELRSLPWWAFLTINRGEIIFPYRYTANSTNFNTTHIFEYTAALDPS  
KTLTSITLPDNTTATTGRLHVFALS L WNAASSA QVQFVRPTQKWTTEGNQVIEVTINNS  
GLDCISGEGLMVSIVMPGVQTLPEGHKRLCPGDQKRVDVGVNGTATGPAEIVLNHDRF  
SVQQHVANVSI GLTEWTS DL SNLAQHESPQWYDDAKFGIFIHWPYSVPGWGNSTPYES  
YAEWFWWYSTHTAADKSDFYDYRLRTFGPDWNYDDGFANFTAANWDPKAWVDLIYA  
SGAKYFVLTTKHH DGLALFN TSDTTDRNTLHYGPKRDLVQDLFDAAKTHQPTLKRGTY  
FSLPEWFNPDFGPYGF AQLPGNSSTTWP GIIARNPYTGLNEPYTGRLPIDDFITDLMVPQM  
EILAYNYSTDILWDCGAANGTAPFAASWWNQARAEDRQVTINSRCGLAEVADFDTPE  
YATFSTAQRKRWESNEGMDPYSYGYNRATASSAYMNATTIIQDLVDMVSKNGNFLLDI  
GPRADGTIVEAEADNLRMAGEWIHSHAE AIFNTTYWFVMPEIADQNVRFQTNDAFYIL  
FLEPTTSSIIYIDAPLPLKGDVVS VVGQNHSHSHIRWEEGQGNAGSIPDSRFTFHVPES  
AWRGEMYCWVLKIEYAA

>7863\_t gene=7863\_g

MKAFYLSLWALAGSASAYLATTTRYDQGEGACGCGSSSSGLDSWQLDVSTGVYTAA  
GSQALFDTDGSSWCGGGCGKCYNLTSTGT SACNGCGEGGVAGESIIVMVTNLCPYNGN  
EVWCPSVGAKNNYGYSYHFDIMAESEVFGDNVVNFEPVACPGAASDWETCICHGQT  
DSDTTPAGMTTAAGSAGTVATSSASSSTSSTSTSTLLAVSTSPVKEVASSTTSSTSTV  
KPVSTVVAETSPTPVVEPTSITVSTTSTAVSTTPQGAATTTTTTAVTQYTTVTEVSTIW  
ATPSATTGSSGAVQTLYGQCGGINWTGATTCASGSTCKVQNPYYYQCVSSS

>7867\_t gene=7867\_g

MATAEEQRRLVKSVCQQIRQMPWEPLAEKQRNSARDIPARGNIWLSRVKFPAPASSMR  
DALYRVINHLKSDYHKITPADETPILDVGVFEFIGERTGVPSDAPEPDISEEDKLQALEKEFS  
SDMTILYIHGGGLYFSSPAEFRAASVRLAKMTKARVASIRYRLAPKNSFPAPILDTLVAY  
ANLIHPPPGAAWSAVPADRIAITGNSSGANLGLGLIKFLEWQKLSG

>7872\_t gene=7872\_g

MSAPRAPDGTKVWTTLITNTAYLSGLLTLEYS LRKVGSKYPLVALYTDTFPEEGHAALD  
ARGILKKHVPYLLPSIPKDYTNDRFYDCWSKLT PFSLVEYDRVVQLDSMLVLKNMDE  
LMDLELDAPELAGTGNKVFAASHACV CNPLKKPHYPKDWIPENCYTSQHENPDIAQTE

GASPAFGLGIPNGGLQVVNPSKGTYDKIVAQLGSAATSDYEFADQSLLSDVFYGRWIAL  
PYYINALKTLRRKGVHDAIWRDDSVKNVHYILSPKPWDDVDEKDPSPKPGYDASHEWW  
RALNTERLEDEKQQRGVNDQF

>7880\_t gene=7880\_g

MARFSFLVAAIGSQLGLTSATPYSEYILAPSDRTLSPVSVYNINGTVDNAIALTTSGSGE  
ATFSPGSNITYDYGKNIAGIASFVSDVNASAVEEFIGVGFSESSLWISSYGSDATNNAGI  
DEIIFAITGPGNYTVDFAHNRGGFRYLNLYHNSTGTVSLSSLTTYFNAAPSLQNYTGYF  
HADNDEKLNRVWYASAYTDQLCTIPSNQGNLADLDASDPNGTTYWFSNSTLTNASTA  
LVDGAKRDKLIWPGDFGISVPAVFLSTNEVDTIKVSIIQLFAEQNATTGAMPYAASPIED  
PPNPAVSGITSVFSFTYHLHSLGLLYYYYKYTGDAFVAEQWNRKFAINYSLSYVDES  
LAYIPVNNPDWLRNDMGYHNIEANSILVYTLKAGLSLADVMADTSITANWTSTITGIETA  
ANQLLWNSTQGLYKDNENATIYPQDGNAWSIISGVANSTTAVTISNSLRSRWGTYGAPA  
PEAGDTISPFISGYELQAHFLAGQPQNAIDLIRYMWADFMLDDPRMTNSTFIEGYDVS  
GA LHYPAYSDDARVSHAHGWSTGPLLALSSYVAGLQVLNSTDWIAYPRPGNLSAFEAGFEL  
SYGSYASSIKVDSDCCTYSLYTPPGTSGSIILDVPAFDANITVTGANNDFFWTKEVDAWT  
GGASPRGISFWGPQDSTNGTVEVDGVPGGDYIVRIRQV

>7882\_t gene=7882\_g

MLLSLCQVVVPALAFASIGQAAILCDSPEFLPVSYALSTTPVDSGLAAAYSTRRKYVLSK  
HSPVLTLDYGV DVAGFPYVDIVSGTGQIELKYTEDFDGLNQIYGDGPWTFVVGARWE  
TITLLTDDTIVVSNPGFEPSEVVCPTDTLPGSFSASVQNYTEIWGLGARAVQLACFDKNSQ  
PSSWKITANGAYIQGQPANSPLGYGMSEYTLFMTKIVRGGTGWRVLSAVSSGPYMI  
LTSSYPDHSTFVNVTLLPPNTLIVGNGPSIVNQTSLTGANLYYPISTKILED TWYNITI  
ATGTAGIDVYINDTLSVTVPLVSTGTWGFPGFMDQIAYVKDVQVTASNGTVIYQNNMK  
SDQTLAEYGVQSN TVAVCVDDGGKRDRVIWVGDVHTARVLPATTYRVEFIRGVIESSFS  
WQLPAGAEGSGLVATRASLGDDNTYKDHFYVTNYGITDYQIFFLLVVG DY YTLTNDLA  
FLTPYWSQVQALVSRMEEYLDPN SGLLGDSYDNYFTAGPVPNATAPAALFAYVLKKL  
VPLAEAIGDTASASAYSSTAQSIANAINNLLWNPTTGTYGVLYRTL IESTLATALPKLFY  
MTGYKSSSISSLTTQSLNTQGFLLEALLISLKNSSSTTTSAALTAISNLLNVYWPQML  
STSRYYTGASWEYVLPDGSPGLELFTSLAHPWGSAPTYLLTEYVLGVGPKTAGYEQWSF  
EPIPALLRGGLDRLDWAEGVVPTPNGGAIKASWKVDRSTGQVKITAQGPAHTTG VITST  
VLIGTWSINGLRATLNGSYTVTGGKQVVLVGTI

>7883\_t gene=7883\_g

MKSFSTLLLALCSLGQVQAFRHTNLSVLAGVHVYVSYSGTTPPAELTTLIEDGLVGGVIL  
FGNNVNSSLPAIVESWQTAYANSPAYIGSPLLIMTDQEGGKVRRLPGGPTESEKVI GESSD  
PEQAASQAGSDAAAALGAYNMNTNLAPVLDVFRTPGDFDDQYQRSYSDNATLAGICGA  
AFTAAQQGAGYIATAKHFPGLGSASTNENTDEVPVTLNVTIEEIRA VDELPYHNAIAAGI  
DMVMPSWALYPDFDDEYPSGLSKKWLKQELRGRLGFRGVTISDAIEAGALTAFGSDSD  
RAVLASGAGMDIILAAAQ NITQGQTIVQALVDALNSRTLDRAEFDEGTRRILALRNKISA

>7894\_t gene=7894\_g

MHSFVSLASLGLASSVLAGPISLPKRKTSTGQNVVYWGQNGGGIVENTDLTTYCSSTSG  
IDIIVLAFLYEFNGVTVPGGGIGQTCSILATSGTSQSCDAVASAITTCQKNGVKVFLSLG  
GGSGGYSLTSQAEAESIGQYLWEAYGNPSTSTVTRPFGNAIVNGWDFDIENPSGSQYYPY  
LISKLRNFASDSANKYYISGAPQCPIPEPNMGTMIQNSEFDMLFVQFYNNNNYTPCAL  
GINGDAAFNFPQWQNFISTNSSSAEIFIGVPAAPLAANGADAGSVYYATPNQLNTIVKA



TEGNSSFGGVMLWAAGYSDSNVNGCTYAQEVETILYDGEVCSGSYVVTPSLTPVAPTP  
SFSGSTGTSTSTATATGTPVPEWGQV

>7907\_t gene=7907\_g

MSIGVALLGAGVFAKKEHLPAIKSSPLLSLKAVYSRSQTSAEAFVAAAGEDSEAYFDSPS  
APSKSLDDLLRRDDIAAVIVCVAIDVPELIKALRAGKHVLESEKPIAPDLKTARSLIDFY  
QKEIKDVLWGVAENFRFWKSVHEAAKIKGLNANLVTFSSINSYSFVNADNPFYHSDWRQ  
KPAFQGGYLLDGGVHFVAVLRTLAAALDRNIEAVSAYTTSIQKTLPPVDTVHAILKTDN  
GRVGSYISSVGIESKLEMNFEIVTDKGSVRYSPFQMQUIIKLKNQEGKWEEQSQTAPLW  
GVKEEVAFAEGISTGRLDKLSIPEALEDLKVVEAMLTSGDAQGLPTIISKDAA

>7911\_t gene=7911\_g

MFRVFFFVFLHVGCLLAASAPQQYTRLLGTFENPSVQTRPRFRYWLPDAGVDKEIVATNI  
KDNIGLGAGGVEFLPFYNYGGGETTSKAPQADWVTNGFGTPAFRDVFRAALQAHKDAGL  
LMDFALGPNQGGVPAEIDDEGLQWDLVPYNIIEVPRNGIFNAQIPGWGVGELVAVVSA  
LVLSETNMTMSAANSPYIQSKTGYISLIVDHKSLSDITKQVTSAGHLSATFPQPTSGIGYRI  
FAYYQKRTLKNSSFENNQTATIWDNGSYIVDHYSAGAQTVIKFWEEYILIDGLKEML  
MEVGHYGWEDSIEITSNTSWTPTIPGRFQRKLYRLEPYLPVINFGVLPDNNVNIQAFEP  
GPVQVILNTEDSGAGYINDFREILADGYRVYLQVLSDWTRNYLGLAFSSQVSYNLPMDT  
ATNVPMDVPECESLQFADNIDGYRQFSGAAYLAGKAIISNEMGAILNEMGEITGAYNY  
PLPRLFSVARAIIGGVNQFVLHGQSYTGDYYGTTWPGYTAFSFSVSELYSNKQPSWDH  
GLSEVLNYLARIQFVQRQGIPTDVAIYNKVSATDSSFPSIYQSDDLLKDGWSWAYPTPV  
NFALPQATVRDNVLGPEGPRYKALVITKDSNMTLYGVERIAEFTAKGLPIIFSGGLPSIYP  
SASGNNRRLKEPSIFSECIQYYQWSCCKHSAEPGIVPQEDPSTGVDYAFIFCDSKSASAEI  
QFSGDARTKIPYYLDAWTGIQKPVFTYITISDSGLSIPISLEGNQTTIIAFSQSPLTSETPSV  
HSTETPASVIGSFYESADKGWTAQVANNNLQDLGKTRLSNNKTIELPNSSQIAEPFNLSN  
WQLVAEHWEAPSDLFDAETIAQKHNTTHELTSLLSWTEIPALQNVSGIGYYSTTFQWPP  
VTGGSVDGAYIQFPSILHAIQVSVNGQKLPSLDYTNANADIGPYLRHGNNEVLAVVPTT  
MWNYLRSIFSQKLDQGSPPGLLKYSSVLPISPNGLIGEVSVTPYVNVNIK

>7922\_t gene=7922\_g

MAIGVAILGAGLFGKDEYFPAVKTNRYNLKAVYSRSQQSATKFGEEASVDAYFDSPET  
ADKSLRLLERSDIDAVFIALPITAQPDIIRAAWKAGKHVLESEKPVAKDSTVAKQLIADYE  
PYKAKGLIWGVAENFRLLPIAYGTEQLKRLGGEVTGFHVSVDIVKDGPNYYGTEWR  
KNPDYQGGFILDAGVHFVAGLREFLSALNDSIEKAVSFSAQMQSHLPPVDTVNGAYLLK  
SGRSGIISLSEFIEYKNDFLIEVTSTNGSVAMTPAGVKVVEKNGSNGDRKEALKEFPSDTG  
VGLVEAFGRAIENKTPDARQSAEQALLDLVLEKLLSSGEQGGAVLTI

>7928\_t gene=7928\_g

MKSFLQIIPFVPLITGSVLPWDNCGLPWYGLQKDGVAVGWLPNSNGNETEGVSSPRYTMA  
EINDRLGAISSTYGMYSHTSQNYDGYELLEELYDIIESKAIFVASVMPVLQAGFNAITPD  
VASQIAAVMREFTRDGVIVWLRYGHEMNWYVDPAAEPRYYGTSAEFVASFERVAEAV  
ADNPMVLMFWSPNNLGGGPASSLDEWYPGDDVADLVGIDCYPQSFNETFEWCYRNFY  
DHFSAAKNKPFAGETGASGDLKEHWLTELVGQSREQYPKYISTAWFEYNKSTDFQLVM  
GDKSVLDETRILGLN

>7929\_t gene=7929\_g

MAIFKGI AFILSLTGVASAFNASLFAGKANYKRESNSLAEQYGIKSDSMISYDGVYFGYA  
PNWNPVVTMEYLNNGTGQKATYNVYSQITSDNVNSGSYDGNNGYQNPDIISGAVLI

ASLMPYVDWTDITPGLCDSVANFFESTFTSQGTTVWLRFAHEMNYYSVGVYPPGGKNY  
GAFLTAWTTMYNAISGNDKIHMYWSPNDDTSSEPVAPWWPGTEYVDIVGMDYYPNAD  
DGLPSFETAYGNFYNTYAAANKIPFAIGETGTQLSGGGSASIAQREQWLRNVINPSSGFG  
SYSEYYISCTWFEYGPPTNDATYYVVYNQGSVIDETISNTENG

>7931\_t gene=7931\_g

MTQITLDQGWFEKQSSNLNDSALSFLPVTQFPTVAHIDLLGHNLIIDPFIDSNEIKSLWVN  
EADWIYRTSEIPKVQLSNENKA VLVFEGLDTVVDVYLNHGHILFSNNMHIGHRVDVTH  
LLKHADGKSVLELKFNRNAPAYAREEKDRIGYKCKNPSDVHFGGPERLFLRKAQYHWG  
WDWGPSINTAGPWKPVYQLIYQQRISSEFIIRQQVSEDLTTADMVVVGVSVESSEKEPEATV  
EVFSPTGELLQQNAVELVNGNFMNTIAIDKPLLWPHLYGDQPLYKVTVSLGNGHSSKSQ  
HIGLRRLKLVQNPLKNSKGRSFVFEINNVRIFAGGSCWIPGDCMLPRMDRHRYSKWLKL  
AKSGNQTMIRVWGGGIVESDDFYDLCDREGLLVWQDFLACGNYPASPDFLRNVEVEA  
ETQLKRVGHASLVWAGNNEDYLLAERFGWDLMSDEKGPWNETNFPAREIYERLLP  
RLVESLGGDVPYWPSSPYGGSFSDTTVGDTHIWDVWHGKLSPYQDYQNYTSRIFSEFG  
FESCPSLRTLCAITVPSERHAQSRLFDNHDKGPGHTRRYPMYMGENFRFRMNPLRDFV  
YCTQLQAEAMSYAYNCWRREFRQFDQEY CAGALVWQMNDIWP GASWALVDVDLNP  
KPAFYVTKRALAKVVLGMSRIITKQPPYIVTGYLPEKHSVDIWA VNGTLERLDVTLNIRA  
YDIESGKRQPLPTEIESQRDLPSNQALEITNISIPNAENTVIVGSLHSVFTGERLARVWSW  
PEPLKYIQLSPELIVSAHVADSGDKILLSSNAPVKGVMLAVPISESGEDAIFEDNFVDLVE  
EVVEVEVQGLGGRKVETRFLYDWEKQEGFEL

>7948\_t gene=7948\_g

MIRQWHLTSPLLLLLLLLAIGSLTGAVAKKSDGPKIALKELDIAPADPFYFKNSDTVMFLSP  
VTGEVYQSFDDGGLEWKVVGNGDVGEGGVTGDMTNAAVLILPHPHDNQKAYILGRHG  
IHWVTTDQGRTWRAFEVPAAPSAFINEPLRFHGEDSRRVIFQGERCSPFACMETAFVTLT  
DFETVAPMRNTARGCFWAVGKPAFAESTSDHADEIGDRVFCIVHGLKNPFPAAAYRLVYS  
DSFFQDNDDGIEAKINEGRPVAGIIDAARTKYIMVA AKSQGTDELAMFVTDDAIVWHR  
AEFGNHKIEEAAYTVLEGTNHSIQVDVMNTDRSENMGVFFSSNSNGTYFTRHIEHTNRN  
PSGYVDFEDIVGIQIVLVNVVENWEEIESDFEAEEKVISQISFDDGRTFQPLKVKDKNLH  
LHSVTEFENLGTVFSTPAPGIVLGVGNTGSHLKS YTKDGDLYVSDDAGVTWRLALEKPH  
KYEIGNKGAVMVAIKDDGKPTKIKIYSINHGKDWDTAELKNEIKPYFLTTTPDSTSLKFL  
LVGFSDDDKQWYIYAIDFEGHERECKDSDFEEWPARLDENGEPDCLMGHKQFYRRRK  
SDADCFITETMFKTPAPEFKPCKCTVEDFECDYNFVRSEDRKECVATILKAPEGTCCKNE  
DDTFKGPSGWRLIPGNACLR DGGEELDKEIDR PCKDALKAPSGDAKAISSTVNYIEADSF  
KEYFYLERAGSSRGEDETVVMLTYDGKLYVTHDHGKTWTHELKDVKVKEIARHTYLN  
DRAFFLTSGNKQYYTINRAESFDSFIGPAELNNAETTILGFHQKYKDWMIWTGFNDCSR  
GECPRSSYITKHRGDSWEILLRTVERCDFMAREDRADSDDLIFCDQHEGEDVHGKRTLVT  
SNDFFDTSNTPLTDIIFATAEEFIIVATPNPENKNSMKFDASVDGVTFADAEPYNDLVPE  
QLGYTVLQSTTHSVFLHVTLNHVDQAYGLLIKSNSNGTSYVLSLSDVNRNNGYVDFE  
KLQGLEGVVIANVVSNTADV DKGSEKLLKSMITHNDGAQWTLIPPAKDSEGKAYSCG  
SDKCSLHLHG YTERRDPRNTY GSGSAIGLVFGVGNVGETL GSKADASTFFSRDGAITWK  
EVKKGNYLWFGDQGSVLVLVNADQPTREILFSTDEGDTWETYQFSDKEVSVLDLSTVP  
SDTSKNFLIWTGTETGSNKLVTVNLD FSGLRDRTCNLDENTGESEDYLLWEPKHPLQEGN  
CLFGHVEQYHRKNPKSHCWNDWSEAHVHSISHNCTCTMEDYECDYNERQSDGSCTL  
VPGLAKPNAVEYCKENPDAIEYWEPTGFRRIPLTTCVGGKNLDRWESRPCPGHQEYER

KHGTSGVVIFFAVIVPIVIAIavgYwvyThWdGkfgQIqlGEGGAQSFITSRGDSPFITIPV  
AIIAATVAavkVlPllVMSLWRSASgyVRLPGSRGPRPYATRAAFASRRGDYTNVDD  
EDELlGDDEFEEDEEGEEERS

>7981\_t gene=7981\_g

MIPLAPALLLQVVSGLALPTDEAAQNTTEARAGCSLPSSYSWTSTGPLANPASGFLALK  
DFTHVPYNGQHLVYASDVNNGGNYGSLNFALFSDWNSMGsvAQHTMSTGAVAPQLFY  
FTPKNiWVLAYEWGASPFsYRTSSDPTNANGWSSPQALYTGSTGSSTGPIDPSLIGDSQN  
MYLFFAGDNGKIYRASMPIGNFPGNFGSSAQVVLSDSTVNLFEAVQVYSVQGQNYLMI  
VEARDPSENRYFRSFTASSLSGSWTPQATSVsAPFAGKANSgASWTNDISSGDLIRASAD  
QTMPIDACNLQLLYQGRATNSGGSYNDLPYRPGLLTHK

>7987\_t gene=7987\_g

MSSSGSENETSSQFMTPSDCSYEDFTSSRLVAATPRNMSSKLEIYSENVLAKLLRVAK  
EALENNNPPIAYPEFVPQRGENIGKYFLREKYFWTCGFFPGLLYTLERAVRYPGVFPFH  
GHEQATQLFDNAFLRQQLATLCDFWKEPIYEMATRDTHDLGFIQPSLRKDWELTGNE  
KSLQFLLTGARSLASRYETNVGAIRSWDILNQKDVtINSMTDDFLVIIDSMCNLDLLYYA  
SKHLGDPNLAEIATTHARTLIKSHLRPEHITGYVEHRPEPLYSTCHVVNFDPRTGSIKDRR  
TAQGYRVDSTWARGQAWAILGYAQTYNWTkDEQFLVVASGLAEYFIWRLESAPVCVE  
IPYAGTNRQENVGRYVPLWDFDAPIEDHANPLRDSSAGTIAANGMLSLSQSMALGNM  
VLAERYRSTAIKIVTDtLECCLSIEKARIVQRENGVHVKNVEEGLRFDSILKNATANHNA  
HDLDRYSDHGLVYADYLLLEFGNQLLRMGFM

>7990\_t gene=7990\_g

MTGEPslPHGGRPGQVTNLNFALNADLPLTVYKISLAQKVLLGSNKTATDVLVSAAGFF  
GTSTIYFTSTARKEVILSAGAFQSPQILLVSGIGPCAELAAFEITCISNLtGVGQNMQDHPiF  
GIAHRVNVITASAGLNNTPLLALGVQFYINNTGPLLIFGQGIYGWEKLPESYRSQLSNW  
SRSILDSTFPDSEIEWLPVAAyNGYSLNKQTADPRDGHNYATLNTAVAPLLRGRVKL  
QNSMNDLPIINPGLMTRPISTWRFSHskDSVSYGVFWLT

>7994\_t gene=7994\_g

MRTSVLAQCLMVTSSLAGRVLKRDSVtAVVNFgnNTGAPQHLASGLLYGVPDTLNQIP  
STFYSDIGYNYERAGGAQTPAPGRGWIWGLAEYEkRFASALSnyKTAQEHGANFIFLIH  
DLWGADGTQNSSAPYPGDNGDWTsWDDYLAQLFSDIKANSMTKSLIIDIWNEPDGSGF  
WNRAQSQYLEMWRtYyKfRAEFGTEVLLSGPASAGEPLASNTWWEAWASyVASNDs  
IPDQYAWHMEGGGDLLSAQAGLQHWLSTYGMPSKPININEYGVFSEQVPAGSAWWIA  
QLERINAHGLRGNWLSGYELHDFMASLLSKPDATSDYSATATGYFPNGDYQVYKYYYQ  
NMTGYRVGTTPSTDLKLEAYATVGTdGYARVLVGVRIEEGTWELRLNDLTALGLPSSG  
TLNVHTWGFPVNSTNAHYGEINAPTDLGWYGHAYSGGTVTFPVYQVDTTTAYAFEFAl

>8006\_t gene=8006\_g

MKYLGVAGFLAAQAAALRHVMYVDHLPSSDLVSSVTHAIMAFAPSENFNSGSTFTPFEP  
IDTFRARFPSTTKIMVAIGGWGDNAgFSTAaVSETSRSTYAQNVAAMLASTGLDGVDID  
WEYPGGNGADYKtVPNSQRADEVNTFPLLVQAIRAAIGDDKILSIATPGLQRDMIGYTA  
DNGPTVFDTVDMVNIMSyDLMNRRDNITKHHTSIKGSLEAVNNYLNIGMNAAKGNLGI  
AFYSKYFTTDPASDCATNPIGCATVQLEDANGQDTGKSGAVTFETNPEVSSSITSSWSK  
AKANGLTDEDAGGQYYWDSDAQLFWTWDTPLITKKFTEIIAATGLGGVMAWSLGED  
SLDWSELKAINSGVAAAQ

>8011\_t gene=8011\_g

MNLEPTGTDAYFNLGSYYRPITTKSADAQTWFDRGLIWTFAFNHEEAVNCFKNAIKDDP  
GCAIAYWGLAYAIGPNYNKPWDVFDGRDLHISLREAHRAAEHAKDQAVGSTTQAERAL  
IEAIQYRYPSGTIEDVGNANEQIFATWNLNYAESMGVAYQNHPDDLIAALYADALMN  
LTPWKLWNLRTGQPNPGSRTLEAKRVLDAQISSNRGLQHPGILHL YIHLMEMSTTPEKA  
LRVADHLRDLVPDAGHLNHMPSHLDVLCGDYRQAIRSNTRAIQADEKYFATAGSLRFY  
TLYRAHNYHFRLYAAMFAGQARVALDVEELERSIPEELLRVESPPMADWLEGFMGMR  
VHALIRFGRWEDILALKLPHDQTLYSVTTTMLHYAKGVASAALGRIEGAENERESFKEA  
LLHVQPSRTIFNNSCLHILQIADAMLNGEIEYRKNNVDQAFIHLRQAIKLDQELPYDEPW  
GWMQPPRHAYGALLLEQGRLEEALVYSTDLGLNDVLPAMQHPNNVWSLHGLSECLI  
TLKRFDEVKLLKKQLDLAVATADVPIKSSFCRLDERTSTDC

>8018\_t gene=8018\_g

MAARPLAFAAIAALLHQAASQQAPTPDNLAPLPTWKCTTSGGCVQQSTS VVVDWVYH  
WIHTVNGSTSTSSGLNSTLCGTEEECYTNCEISPATYDSLGIKTSGLNLTNQYVTS  
TTSSASPRVYLLDPASKNYEMLQLLQGEISFDVDSNLPCGENGALYLSEMDATGGRSQ  
YNPAGASYGSGYCDACGSSSWFNCSINSGSLGCCNEMDLWEANSEATALTPHPCSV  
DGPYGCSSGACSTGVCDKDGCGFNYPALGDQSYYPGLTVDTSKPFTVTTQFVTSNT  
KTGTLTEIRRSYTONGKVIANAVASSSSGFGASSITESFCTAMDSEASTLGLPTMGEAL  
GRGMVLIFSINWDAAGGYMNWLDSSGSPSSTAGIPSNIQSSDPGTSVTFSTNIKWDIGST  
GPGTGVSSTSSSSSSVSSTTSSTTTKSTTSATTTTSSAGPTQTHYGQCGMYTGTICASP  
YTCVQVQNPYYSQCL

>8029\_t gene=8029\_g

MKTTTVAACCPVLLGTGAAAYTLQWDVNSSNFLDYFVFDTETDPTAGFVKYVDQST  
ASSDGLYSTNSQIYLGVDSTTVLDSSTGRNSVRVYSQDTFSSGILITDFAHLPVSVCGI  
WPAYWTINNQANPYGEIDIMEAYDDVAGAYVSLHTGNTCTLSTTDFGTDIRTDCLSN  
GGGCGVQSTSSQFAGFNSAGGGVWVLSLENSLQLWVFPREIPADITNGSPDPSGWT  
PLFEFDSNNGCDVASNFIDQTVIFNLDFCGANGAGGQEWSDWTDCAATTTGQSTCNAYV  
AANPSAYSETYFSINSIKLYQ

>8052\_t gene=8052\_g

MGLLPARKAVALQISAGQAIKIINTHGKQVVDFWAFNPDAHDYLSMVHTRTVLRKVA  
VRLGDSLSTRRKPMLEEDTTKGVHDIWSACDAERYRMQGVQGYHDNCSENMHTA  
LKTEFPNWTGIPDDWVPDPFNIFMVAIDHHGGLDIREPMSEKQYVILRSNVDLILVMS  
SCPQDIEAVNGGMPTDCEYEIFEKEVAGETEVTLLSPVKALSTRPQRRVKVALSDFDA  
VSHWLTGCHPDNNMADYSSGIFAGQVGAIRLLNMLKKFDIADKVTWFIPGHTMETFP  
DTVQVQVNSGAEIGLHGYAHEGIYQMNVDQERDVLEKCIEVATKLCGKPPKGYRAPMY  
TIRETTVEMLRKHKFLYDTSMLMHDSQPYWTPSDPPIEHIDFTKDASSWLHPSPIAAQTKP  
AEGKHALVEPCGWYNEDMMPLQYLPHLANSNGYVSTRVVEEMWKDKFLWLWENAK  
GEEGTSTTDFVFPILMHPDTSMAHIIIGMSERIIKWLKSWGDSVEFYKHEDIAREWLADQ  
K

>8054\_t gene=8054\_g

MTATEPVSETYDVVIVGGGPVGLLTAYQIARFGLSVCVLEKYDKQTQDAFGRAIALFPR  
TLEQLDQLDIEPMLQKGFACRNSVTYKDGVQQKARIPGRVWTFMENIKDTAFDFVLV  
RQMHTTEILRDKLRSVGAVYRESTECTGFEIEDGVASSDAYPVKSFFTSTKTQEKIVLRSK  
YIVGADGGRSFRRHAGIPFEGDTSKDIRIDGIVETDMPKRAYGAIESKTHGNVLA  
PLDHGATRIGYAFTEPIAAKYPGGVTEEVAVKEAIESMQPFNVKFTVHWWTLYTIGQRI

AKEFSTKDRIFLCGDAAHTHSSGAAQGLNTGIHDSVNLAWKLANQIHGFTRPEVLQTYA  
TERRAAVEKLINYDKDISLLMTHKWPSWYTGDPADPYLVLGQIFEQAASFNTGLGINY  
PANVLNQFPAATSLKIEPGNRAIDVDLTVPGINRKRVRFEIARNLGRFVWVIFAGKIDLTI  
SSLQALRKYLVERNELYSHPATKWL TISR DAGCSPYETLGMAPFGDTYYDIDGLAHEKY  
GIDPSVGGIMIIRPDGLIGTGGAIEGALVQHYLETVLIL

>8064\_t gene=8064\_g

MKLSATVAIAAAGTLAAAQGHHAHHHAHKRDTVATSTVDEVVTVYQLDGTVPVYAD  
VCQGIKNGDYKWAEGAPAGACATSTSTSVKAAEFIQTTVSISSSTSSSTSVITTSAP  
TTSATPTTSSTSTPTTSSTPAATTTASSSSSSNGATGVDA SFPDGELDCSTFPSEYGAVSL  
DYHGIGGWSGIQYPTYNALETLVENIVTAVTGESCTEGAFCSYQCPAGYLKSQWPSTQG  
ATGQSVGGIKCSGGKLVRTNTDYETLCIAGVSGVTVKNTLSSVSVCR TDYPGTESETLP  
TVVEAGASSPLANPDGSTYYQWEGKSTSAQYYINPAGKDETVACTWGSSSSNVGNWAP  
MNMGLGFKDGLTYISIFNP TTTATLDY NVKIEGASGPCYWDASAQTY YQGTTASSTG  
CTVSIPEGGSAEVV FY

>8075\_t gene=8075\_g

MPYTSPLQMSPAAPLPPHLAQTVPVSTSELSHMHTHSPSSETSSASSSHSSHSTHSVT  
HSHQPRTLPRSSFSQSYLRHRRSPSYSKASLSSLGEANSTDRTSLSVAVDPHASLRQS  
PPRNNAVIPSGAVISPPESAGNSSDEDASPTDLRHVDLIDAAIRTLNAQKKNEGQEEKKE  
ISALTSVVPALTPEARKISHRSSTEGSLITDSIETSES DRDEDEEGPKPPMVRKKS GELV  
RPALRSRRRPSSMPGTPTFSKNVHFDSQLEHIRHFLQLDKPLAVSANTSPVETYSEEHEYP  
FNKPQPSAEWEIKLPNFPSPAMRKQQPVR LERVFLSSDHKNLVGVVSVANLAFHKHVV  
ARFTVDYWKTVSEVTAEYNHDIRKKQAHDGFDRFDFSIKLSDITDLGAKTLQVCIRYTV  
AGQEYWDNNDNMNYQIQFVKSEKAQPAQEQA PSRDRARALPRSRHNPSTAARPRSMPP  
ASFDDFGPSFDGSDRHDDSLGFRLTTLDSHDLFEAPKPREKQGRQAFGNRYDFGLSLSAA  
RSSGATEDRTTLSAKAKSQSSRGESLTNVHAHPRDAFQSSAIGKPHLESPTYKELVDKYC  
FFGSPKVEGSLNSSKSSSGSVSPDTMPRVDSGVAMNLVPENESSKVG MNSFNGSPIIFNPV  
YRGHISRSGFESQPAAILS

>8090\_t gene=8090\_g

MKPHSHNDYSIAWICALPLEMAAAKAMLDETHPALQSSNDHNVYTLGSGHAAVVFSC  
LPYGVYGT TSAATVLAEMRATFPRLQFALMVGIGGGVPSSTADVRLGDVVVSKPTAAF  
GGVVQYDYGKATSSARFERAGTLNKPPVILLNAMAQIESDHLEGETITNIVADVLEGKE  
EMRKKCSRPEHDWLFQPNYLHETFDGTNTECLACNRNQLVKRNPRPNDDVRTHYGLIA  
SGNGVMKDANKRDLIAQELDILCFEMEAAGLMDQLPCLVIRGICDYCD SHKHKEWQGY  
ASLTAAAYAKHLLSVVPTGSRPVPVESENQSWMVPFQRNPKFTGRGEVIKKLEDFVSRV  
DGPKKFAVVGLGGMGKTQVALELAYRVRDKDPDCSVFWISAVSDSSIEQAYMSIAQEL  
DLKDVPANVKSRRVSHLARREMGKWLIIYDNADDPDMWLS EDDTPTTELKDLIPDSQ  
GRVLFTRNRQLALRLAPSNVFSITEMDEATATEVFRKSLIQKDLLDDIDVT TLLKQLTF  
LPLAITQAATYINNTGIQLSDYLALLQE QEQDVVELLSENFE EERRYLETQNPVALTWLIS  
FHHIQRRDPLAIEYLSFMACINPRNIPRSLLLPASSLKRQTDALGLLSAYSFIT TQKDRSFSL  
HRLVHLATRNLWRQHDLRLPWLKKAHRLDEVFPNSQYTNRPLWRLYMPHALYLIKE  
GEGMATRKTYASLLQRIGRCLHKDGRYNEAEGLLRTVVEIQEAKYGPADV LTVAMGH  
LASTYRKQGRWKKAEKLELKILETSMKELGPEHRNTLDSMHHLTLIYSKQRRWKEAEE  
LEMEVVEISTRVLGEEHPDTLNSLFNLASLYWEQGRLEEAELEARLLELSRKVIGVDHP  
DTLMNMHNLAFTWYDMGRHEEAFKMMEDCVQLRIDTLGPEHADTESAVQALNGWRE

KEKEPSSHRKTRRTHESKSSITSKLESTSTTKSETTPSLRKTRTHKSVDSKTSSQSSQSTR  
QRKLEGVKRLFRNF

>8101\_t gene=8101\_g

MSTTPSLRKRGGAKKDVAEPAPSEAAFRQTNPVSAKVAAKPPSEWDYWVAMFVMTVL  
AFATRFWMINYPDEVVFEVHFGKFASYYLQRTYFFDVHPPFAKLLFAFVGWLVGYDG  
SFTFENIGDSYITNKVPYLAAYRALPATLGLSLTIPVVFDMWESGYSLPACVLASGLMVFD  
NAHIGEDRLILLDAVLVSVAVSILCYVKFYKQRYNEFGRKWWKWLTTGISLSCVISTK  
YVGMFTFVTIGSAVLVDLWNLDDIKRPRGEISLFRFGQHFAARGFALLVVPFFFYLFWFQ  
VHFAVLTRSGPGDDFMTPEFQATLSDNPLTANAIDLEYDNIIVIRHKDTKVYLHSHYDQ  
YPLRYDDGRISSQGQQTGYPHNDTNNQWQILPSVPPFAENDLTGHKIKNGDIVQLRHLF  
TNTILLTHDVASPLMPTNQEFFTPQELADGERHQDTLFEIKIENGKPGQNFQSLSGFLKL  
IHPTRVAMWTHHTPLPEWGYKQAEINGNKNSLQSSNIWYVEEVPSIPAESPREEKKERQ  
VAQLGFVRKWAELQRAMFFHNNALTSEHPYASEPFQWPFLLRGVSFWTNAETKGQIYF  
LGNPLGWWFASLLAVFVGVIGADQLSLRRGIDAIEIWWGPGARSRLYNSTGFLFCWA  
AHYFPFWLMGRQRFLHHYLPASCLVAAALVEFIFTDPIAPSKTDYKVDPTGRGRL  
TLGRFRITAKERLGRQSLYACWAVTVVLSAVIYSFVYFAPLTYGFGLVNDEVNARKWL  
AYDLHFAK

>8112\_t gene=8112\_g

MASTAVDPFLKGNTGRNTRGLLRIVILCTIAAAAIASRLFSVIRFESIIHEFDPWFNFRATK  
HLVEHGFYSFWDWFDRTWHPLGRVTGGTLYPGLMVTSGVIYHFLRFLTIPVDIRNICV  
LLAPAFSGLTALATYLLTNEMTTSPSAGLLAAAFMGITPGYISRSVAGSYDNEAIAIFLLV  
FTFFLWIKAVKNGSIMWGALTALFYGYMVSAWGGYVFITNLIPLHIFVLICMGRYSSRLY  
ISYTTWYALGTLASMQIPFVGFPIRSSDHMAALGIFGLIQVAVFVDFIRGQVPGKQFQTL  
LTSLVLLIFGVSFIGLVALTLSGTIAPWSGRFYSLWDTGYAKIHIPIIASVSEHQPTAWPAF  
FFDLNFIWLFAGVYMCFRELRDEHVFVVIYSVLASYFAGVMVRLMLTLTPVVCVAAA  
IALSYVLDTYLLLKSPAPATDAAAAKSDGLRSEGTNHGIQSTFSKVFTAASVSAYLLLF  
VAHCTWVTSNAYSSPSVVLASRMPDGSQFIIDDYREAYYWLQNTTEKNAKIMSWWDY  
GYQIGMADRPTLVDNNTWNNTHIATVVKAMSSREEVSYPIRQHDVDYVLLVFGGLL  
GYSGDDINKFLWMVRIAEGIWPDQVKERDFFTARGEYRVDDDEATPTMRNSLMYKMSY  
YNFNNLFPAGMAQDRVRGVRLPAEGPQLSTVEEAFTSENWIIRIYKVKPLDNVGRDHQS  
AVAFEKGHKKKKSTKRKGAPVLRVE

>8149\_t gene=8149\_g

MVVLAILAIALGFLSALAAKNSRSEHDNIVQLDYASYRGYKQDGGVSYWKGMRVYAA  
PPTGSLRFAGPQDPVQSDVQDATQHGDLCISTGVHPISNQSEDCLYVDVYAPTATNS  
TTLPVFVWIQGGYNALTNANYDGTGLIEASDFNIVVVFNYRVGPYGLASQELEHSG  
CLNSGLKDMIKLLQWVQKYIVQFGDPNHVTIGGDSAGAGAITLLLSAYDGSNQLDSL  
HAAIAESQSFQPQLTVSESQFQFDNLERTGCADSTHPLQCLRNLDTLQENIEIPYPSG  
VLPPLYPYGPTIDNDLVSNYTFTLFGADKFTKLPPIFGDDTNEGTVFTPHNTSSVARADEF  
LSDNFPFLNETELSTINSMYMSSPDDPVYPHAGVYWQGVSKAYGEMRYICPGIYLTDAY  
TNASSATRNTTWNHYHAYLDNTANTTGYGTQHTIEVNAIWGPDYVSANSAPRSYSMTT  
NEGIVPLMQGYWTSFIRSYDPNTYRAPGAPEWKVWAEGERLFIRTNETHMESVPSEQVS  
RCKTLAGMAVWNHQ

>8220\_t gene=8220\_g

MKSIGGVVALATMAAAQNLSYGADNFYRSDLVTLQPISFKNQYGMTIAANLFTPKNITA







IQLQFLFGSSDQLYLKYCRNNRIEPNFISNEHGLKAFWIGSPKAKYIVINFHGGGFAMDAT  
EPHLHFVQSVASKLSDENITGWLHVYTYLTPHATYPTQICEAVEALRYVIKDLGRSPRD  
VILVGDSAGANLCLVLLSHLSHSFPDAPKLEITEPLKAAVLLSPWLSFRHDWPSVTYNAH  
KDIDSVEVTTRWSQEYLKGRSSNYVEAVEAPESWWEGTQVEHTLVLAGSDEVLLDPIE  
TWVKKFSKRNPNTLLIVGQKEFHIAPLIWLMAESQETQQGLALKNSLHLGMLGGR

>8408\_t gene=8408\_g

MLTEQARTPTSGRPVFRRTTGRLYTKNKVQPHRSPSRNSKELPMKAYGGTNRGNLGYEG  
EYTSYDFGAAITETRELGAKRISN

>8414\_t gene=8414\_g

MSESPPPPQWNISTMAGNAMQFLRLPMLASSGLAVIASSLLYFKQNEIIPRTVPVDSRT  
NVPKASSFGISDYEDLQIPTDGESLNALFIRPSNKDTARDVTILMFHGNAGNIGHRIPIAK  
VLTKALKCNVFMLEYRGLSTGTPDEKGLNIDSQTALDYIRNRAETRDTKIVVYGQSL  
GGAVAINLVARNLEKDVISGLILENTFLCIRKLIPSVFPARYLARLCHQYWSSDEVLPKIE  
NIPILFLSGLKDEMIPPSHMSQLFEVCKAETKVWRELPNGGHNDSVAEPNYFDYIRAFVV  
DYVID

>8416\_t gene=8416\_g

MIVKTLIGLMAVGMATAHIEMSWPYPLRSKFDPTTSPDYSMTDPLKTDGSNFPCKGYQ  
TNPWRSVVITYTAGQTYNISLAGSAVHGGGSCQLSLSYDNGTSFHVIESMEGGCPLVST  
YDFTLPSDAANGDALFAWTWVFNFEGRNREMYMNCADVTTITGGKGSVDGFESAYPKIFVA  
NVGNGCKTVEEQETVFAQPGNQIHYGGSVSSSSAPFPTCS

>8423\_t gene=8423\_g

MAKPVADVNGMNTGGFATDGSVGTGFSAMHDSGTGGNPSLGNFPILPQICPDDVIDNC  
NFLIGSRAVDYDNSSVKASPGYFGLELANGIAAEMTATQHAALYRFNFQNAFANSTGTK  
PFVLLDLTDLWQSRQNAVSVDETTGRIRANGTFLPSFGAGYYESFVCVDFAGGSVNET  
GIWVNNRAGTVVKDLFVTRGFNLFYLEAGGFVTFDSLNNNTLYARVGVSLVSTEKACQ  
NAETEIPEPTSNFADIQSAEEAWREKLSVSVNARGVSEDLQKLFWSGIYRTMLSPQNY  
TGENPLWRSNEPYFDSYCIWDAFRVQYPLLTIIDPSAQSQMVRSLVDIYKHEGWLPDC  
RMSLCKGWTQGGSNADVVLADAYVKNLTGIDWDLAYDALVNDANEPLEWSVQGRG  
GLQSWKRVNYIPYLDYDFYLGFGTNSRSISRTVEYAYNDYCVGVVGGKGLKGTNAATYLS  
RSTNWQNIFKADQTSFINGTDTGFGVGFQPKYLNGTWGFQDPIACSPLTDFCSLTSNPSET  
FESSVWEYQFYVPHDMSSLISTLGGADQFISRLDYYESGIADISNEPVFLSVYAYHYAG  
RPGLSTKRAHSYIPFFNATESGLPGNDDSGAMASFSIFSQGMFPVAGQNVYLISPPFFES  
VNITHPETKKTARIRVTNFDPTYTDIYILNATLNGETYTKNWISEFFLQGGQTLTLELVGSN  
ETASTWGKSADDLPPSLSIATHRFL

>8426\_t gene=8426\_g

MYALRPLFMAFGLVIGVVSYEHSPTNATHPWSERIDFPLIPVAVSMIPKNGNLLVWSAY  
KNETFGVDASGVTQTAIYNLTDGTVSRYSIDHTEHDMFCPGISLDFKGNIIVSGDTEEK  
SIYDQSWKAAADMQIPRGYQASTTTTDGRVFTIGGSFSGGIGGKNGEIYDPEVDKWTM  
LPGCSAEPILTNDAGGLYRSDNHAWFAWSNGSVLQAGPSPKMHWFDRGDGSTTFAG  
FRANDSDAMTGTAIMYDAGKKGKILTLGGAPSYNDSLATSNAHLITVRKPGPEVKVETLD  
NMHSARAFANSVILPDGKVFVVGQSHPIVFTDGNSSMIPEMWDPKTKKFTLPTPR  
NYHSTALLLPNATVFGGGGLCPWKCDINHLDIAHIYTPPYFFESDGVTPATRPVITHIPNP  
ILKVGQTLNVTLSKPVESYQKLTFSMIRMASATHTVNTDQRRVNVSPAATSTLFTLGLP  
RDPGVLLPGYWHLFAMLNGVPSVAETILVEPLA

>8432\_t gene=8432\_g

MSCPDCFRGSDERTDATPTGEVITLHGLPTYAA YPSAGKDPKGIVVIIIPDAFGWEFVNNRL  
LVDEYARKGDFTVLMPDFMNGNACPLWVIEPLDTAMRTESFMGFLRNWYDVIRVVYG  
FVPHLIKNRMSVTMPRVIDFLTKLRQAEANLPVGVAGFCWGG LHTIHLAAEAPGNSKD  
LVDVFFTAHPSSVSFPKDIEGIKKPISIAVGDKDPLMTPKQAEETEAILRKNKVEQEIVIFE  
GAGHGFSVRIDRTNPKQTEQAIQAEVQAIRWFTKHFEMVRS GGGGTV

>8433\_t gene=8433\_g

MSVTSNLSVTHPSSSGRVLQAKFIRPAQMSLFARLTCY PPLGEVTCVKRSLQPGSVAD  
DKIQFTVILSSSTSFPERDWEVEIWHNILQSQDWTSLPL TRSKSYNPTFIGNTDDVQNYHH  
YLYSAELKLPS CAGGGSFTVRYRTGPDTDWQWANQRRYVKDGEVVFGEKNLAILSNTN  
TAPESGAGHSPRDEIGEYIQLPTQLEVHAKKSETPNVLL WSITGTAPPAEGETSGRAEIS  
LGTPKSFLRYFTLVRVWSPWLAPRHGEKTFRLTEDAMLCS FLRS DGLNLVFLAVSGVND  
ILTLFGSGTEGDIVIKARNENTEAAARFQILASVAETFE ECICSLIYEARKVVRDSSTVELP  
VVSDLPPQPSSPISDDIVIVGDDARTQWLADWYEGLSYCT WNALGQNLTEDKILEALDA  
LKSHGIQVVNLIIDDNWQSLDNEGKEQWHRAWKSFEANKK GFPSGLRHTTSVIRQRHPN  
IGHIAVWHALMGYWGGISPEGELAQKYKLKEVDRKDTVAG GKMLAIDPDDINQFYNDP  
YSFLTSAGIDAVKTD AQFYIDLLVSAEDRKRFISSYQDAW TIASLRHFSTRAISCMSMTPQ  
LIFHSHLPTNKP SILVRNSDDFFPDIADSHPWVFCNAHVSLF SAHLNIIPDWD MFQTSHP  
YASFHAAARA VSGGPIYITDKPGEHDIELINQITAPTTRG TTVILRPSVVGR TLDVYHNYN  
EGNILRIGTYS GWARTGSGILGLFNISPADVSTIVPLNIF PGVSTTGANSSSSFP SNEHSDGS  
SSYIIRSHSTG VISDIMTPTGAHSLVSVSLTARGWEILTAY PLRTFTLEGSRGCSSTSSSMTS  
LLTHVAVLGLIGKMTGVA AVVTSGIAVVD SGRLKFDVNLKALGVLGIFHSSLESKDIDK  
HIMVMISGLAVPRETVWKDRDNVIAVDVLRAWKALKLDAG WSNEVRVQ

>8447\_t gene=8447\_g

MGNTTSAVARQCLLD AVGNDA SLVAFPTALLYESVDVNPYNLD YPVTAAVTFPETAD  
QVAAIVRCAVDADAKVQAKSGGHSYANYGLGGEDGAIVVDM RHFQQFSYDPTTQYAT  
IGAGTLLGDIDTKLHDAGNRAMTHGTSPQVIGGGHATIGGLG PTARQYGMALDHIESAQ  
VVLANSSIVNASTTEYPDIFYAIRGAGASFGVVTEFTVRTEA EPGIAVQYQITFNIEDTSSR  
ANTFKAWQNFISDPTLPREFSCQLVLAEGLLIEGFFGPLADFEAL QLESKF PANQGYN  
VTVFNDWLALVAAWGIQLGEDLSGGIPAHFYSKSLPFTNTTLIPDNLVDDFFEYIDTADK  
DTLLWFIIFDLEGG AISDVPVHATS YGHRDALFWLQSYAINLLGPVSATTKTFLNQANNV  
FLSGMPNATFGAYPGYVDRELVDGPEQYWGPNLETLIAIKSAIDPQDIFHNPQSVPLK

>8453\_t gene=8453\_g

MSSYNRLDPYADNGGHSPVMNPHYPDNRTSPSPGRPLQPYQHETEFRPLQMPSTDHLLDQ  
PTYSVEGINNSYGHNERFEEHYTQNYPN EYTLRPEDHHDAYYNQPYEPTGIPHDDYDLS  
NYPHQEPTPYQEDRPILQADNPYGPNPYEPPEYTHGDDYIANEAAGQPDHDPTPPAVTP  
SPAPIRRWKT VKEVQLFRGNLVLDCPVPPKLLNQVPHAQPPERDEFTHMRYSAATCDPA  
EFYNDRFTLRQSLFAKPRHTELFIVITMYNEDEFLFARTLIGVFKNIEYMCSRTNSKTW GK  
DAWKKIVVCVISDGRAKINPRTRAVLAALGVYQDGIKQVNGKDVTAHIYEYTTQLA  
LGLKGTQVSIKGRSATPVQMIFCLKEKNQKKNINSHRFFFQAFGRVLDPNICVLLDAGTKP  
GKDSIYHLWRAFDLEPMC GGACGEIKVMLDKGNLINPLVAAQNFEYKMSNILDKPLES  
AFGFISVLPGAFSAYRYVALQNDKTGQGPLEKYFAGEKMHGANAGIFTANMYLAEDRIL  
CFEIVTKRNCRWVLSYVKSSTGETDVPDRMAEFILQRRRWLNGSFFAAVY AIAHFYQIG  
RSSHSFMRQFMLGF E FIFQTINMLFAWFAIGNFFLVFHILTQYLGSSDLLGTPGAILGVVF

EWIYLSTLVACFILSLGNRPQGSNKFYMTMVYFWVVVMIYLTFAAIFVTVKSIQEQTEN  
GFTFSDLFTNQHFHTIIVSLASTYVMWFVASLIFDPWHMFTCFIQYLLLTPTYTNVNLVY  
AFCNTHDVTWGTGDDKAELPSATVKPGGKVDVSIPQDGGDLNAQYDIELSAFATKP  
PKEVRVISDAEKQEDYYKGFRRSGVVLVWIFCNFALGAVVLSTAGLENLNSSSSTSDTDA  
KRADIYMSVVLWSVAALSLIKFIGAMWFLVVRMFRGV

>8474\_t gene=8474\_g

MRFRSLIASSILLACTGAEQFEIPQVQSAVSSALSHFSDYVHYNEPTGTAAAAVASATAK  
VHAFAEAAVSDPSYWLADIAHQGHAPYAESGYVFRNVKDYGAAGDGVTDATAAINS  
AISGGGRFGPSSGETSSTTPAIVYFPAGTYIVSSIIDYYFTQLIGNPNPAILKATAGFTGL  
GLIDGDQYQSSGNQGWSTSNVYRQIRNLVLDLTAIPASGGSTGIHWPTAQATSLQNVEI  
KLNADSGTQAQGIFIENGSGGFLTDVTITGGLYGLNVGNQQFTMRNVAISNAVTAISQIW  
NWGWYTSGLTIDSCTTAFDFSIGGSSAIGAGSVTHIDSTITNTNTFLKTAWTTSSSPTGAGN  
LIIENVALNNVPTAIQGPNGVYLAGGTTTISGFGQGHQYTPTPGPSVLNGAFNAASRPSGL  
LASGSSKYFTKSKPQYESYGTGSVSVRSGAKGDGSTDATAAIQSALNSAAASGSIAFF  
DYGIYRVTDTIYIPGSRVVGESYPTILGSGSKFSNIELPYPVVRVKGAGDSGSIEASDIIVS  
TQGAAGAVLIEYNLNGNQSGSLWDVHTRIGGFTGSNLQVANCPKTAAVSAAACEAGFT  
SLHITSSAKNVYLENNWFWTADHDIDDASNTQISVYTRGALIEGSNIILYGTAVEHHS  
YQYSFSGASNVVAGFIQTETPYYPSPDAKSGPYAYNATLNDPNYSTCLSGNCDALGLY  
VTNSKSVYIYGAGLYSFFNDYSTTCSNAGNGEACQSEIFRVAGSTSGLRVYTLNTVGV  
NMIEVDGTSEAKYSDNISVYPDGLVLFYTN

>8476\_t gene=8476\_g

MAYRDGSGISSRFSNFVILQTYKTVAGQLIRADFLIPKALTIERNQLQHPVIIQFHSGALT  
VTELLSALSTPIQLDLDRVITGSSAGGFLSIYLSMTYPDEVRACCTAYPMLKQDNPISSV  
TSAHVISTSIPDRHRADNIVSSDTSNERSALTLQLIEDGTLVQYFARNSAASPALQERLY  
QLQLRKKPETRLPRGGLVIVHGLQDTLMPAQLSEHFVNVARRELKGRQGADRIVLSLQQ  
GGHGFDTDLELETSWL

>8478\_t gene=8478\_g

MKYITPTYLTITAAIIGQYLLPAIQSVLFSSNA AFLFLFAFRYLRLIVHIISYWILYRPTLSPQ  
KPRFHPHDVTVIVPTVDPENENFVDCISSIVSQHPKLLIVVPSKGMVKLTKKILTSQLRS  
KKVPISVLRVAVKANKRVQVACAIPQVRTAITIADHDVFWRSPNFLSTILAPFEDPKVGAV  
GTNKRALRTEKGFSTAGFWNMLGAVYLERQNFVDRATNALDGGVFNVSGRSAHRTSI  
LQSPEFLKGYLNERFFFGLFGPLNCDDDNYITRYEVRHGWDIKIQCADGLMETS LGTYP  
KFLSQCLRWSRTTWRSNSASLFTDLTVWSRQPWCVYAVYLTSFVNFALFYDFALVYCF  
LHTTWASTSATVCLVWVIFASKLVKLIPHLCNHPKDLMFLPGYYAFGYFHSVIKLYALL  
TFWDVTWSGRQLDRIDTDDGK

>8487\_t gene=8487\_g

MLFSRPVLERFSSVLALS LYVTGSLAGPCDIYSSGGTPCVAAHSTTRALYDSFTGALYQV  
SRGSDGATTDISPLSAGGVANAAAQDTFCASTTCLITHIYDQSGNGNHLTQAPPGAASG  
PDANGYDYLSAIGAPVTLNGSKAYGVFISPFYGRNNAAVGTATGDNPEGMYAVLDG  
THYNTGCCFDYGNAETSSDDTGNGHMEAIYFGTGDGSGRGTGSGAGPWIMADLENGLF  
SGYDPINNDADPTITSRFVTAIHKGEPNQWAIRGGDATTGSLSTYYSGIRPANGYYPMSKE  
GAILGTGGDNSDRAQGT FYEGVMTTGYPSSDDTESQVQANIVAAGYATTS LISGPGLTVG  
ENISLRATTSCCTTRYIAHTGSTVNTQVVTSSDDL TTRQTATWTVRTGLGNSGCYSFESV  
DTPGSFIRHSNYELMLNANDGSKIFSEDA TFCPQSGLNSQNSFRSWSYPTRYWRHYNAI

GYIASNGGPFDFDSATSFNDDVSFVVSFGFA

>8494\_t gene=8494\_g

MSGDTRITDIYLMQHLGITLYDQRKYGEAETMFNQTVQSRERILGKEHKDTLYSKHWL  
ATTLVYVQQRHEEA VEMFYQVVQGRERTLGKDHEDTLVSRHGLARTLFVQKYEAE  
MFIQITQDRERILGKDHGDTLISRHALARTLYFQQRYEAEKLFSTVQSRERTVQKDH  
DTLQSKYLLGLTLYHQQRYEAEKLFSTVQGRERTLGEDHRDTLQSKNWLALILYAQK  
KYEEAEKIAEQAVQGRERTIGNHPDTLQSKRLLQKIRDGRPTTVPHRLMHRPT

>8502\_t gene=8502\_g

MSTKSVIIVGAGAGGIATATKLAKAGFDVTVVEKHDFVGGRCSLIRHDGYRFDQGPSLF  
LMPELFEEAFKDIGTMSAEGVQLLKCEPNYRVWFPDNDCELFSTDIVKMKIEAHEG  
KDFGHRFLAFMQESGKHYELSVKHVLRKNFSSYVSILRPDFFATIFDMHPFESYGRITRY  
FKSDKMRRVFTFASMYLGMNPYEAPATYSLLQYTEIAHGIAYPAGGFQTVLQALADVG  
KRMGVKYLFNPNVSVILSKDQKTVEGVKLENGKELRADLVMMNADLVYAYNNLLPPS  
KYARSLKTRAASSISFFWSFDSIIDELDVHNIFLADQYSESFDAIFKKHSLPEDPSFYINV  
PSRIDKTAAPAGKDAVVVLVPIGHLENQSDVKDWDALVANTRNLIFDTIETRTGVRNL  
RQRLVHEDVNTPTVWREKFNDRGAILGLSHSFFNVLCWRPKTKHDSIKGLYFVGASTH  
PGTGVPVCLAGGKIVSEIINDWMPERRVRTALSTQLLGPLVLLVSLLLVWYNLQSGS  
HSQRRFLTASS

>8505\_t gene=8505\_g

MSWWKNATVYQIYPASFKDSNGDGIGDIPGIHAQLDYIESLGVDAIWLCMPYDSPQHD  
MGYDISNYEAVYPPYGTVKDVEALIEACHERGMRIILLDLVINHTSHEHAWFKESRSSKN  
NHKRDWYIWRPAKYDADGTRQPPNNWRSCFGGSVWEWDEETQEYYLHLFAPQQPDLN  
WENPATRAAIYESAMEFWLRKGIDGFRVDTVNMYSKPSDFDAPVTDASQKWQSAHHL  
FCNGPRIHEYIREMGQVLLKYNAMTVGELPNCPEVEDVLRYSVAKEKQLSMVFQFEIVD  
LGAGQNLRDYDTVPRNWTLPLRQRTLVTQRLMDGTTDGWSTAFLENHDQARSVSRWG  
DDTTPELWARAKMLSMFVASLSGTYLYQGQEIGMVNAPSSWPISEYKDVSTNFYRF  
VREITNDPIALAKTKVALQHLARDHARLPMQWDGTVNAGFTTPEATPWMRVHDNYQ  
SLNVKRQNLQDQSVLAFWRQMLRLRRNYPDFACGVFQDTPQGESVFLFEKVGESNR  
KLVVALNFTSKTQKVDLVNRLGRDYKLLIQNGDGESLENLQAYEGRVYLVTLGMNQD  
KAYRG

>8507\_t gene=8507\_g

MAPRFDLVIVNGTVVTASDISACCIGIKDGKIKALAYAFDQDELEGAEIIDAEGAYIMPGG  
VDAHVHLCQDLKTGPYGLGECADDFDTGSRSAVAGGTTTTITFATQTRAEEDRSLKLV  
VEAYNARAESTGSYVDYGFHIIIIVRNDADILENELPILMKDWGISSCKLFLTYETQRLTDS  
QLLDVMFAARKHSITMIHAENGMIGWLTDKLEAKGMVAPYYHALSRPIAEGEATN  
RAISLATLIQNPILVHVGSALGAANVRRAQIMGLPVYAETCPQYFNLTWDDLKRFHSPT  
CFENSKMICSPPPPDNDHEDLFVSLQNGTFTIYSSDHCPFRYDHPHGKPSGVLEHAPSM  
EGENHDCHGEELQDLLLRKSGAFRHPNGIPGVETRLSLLYTALQTGRITPQKFVELTS  
TNPAKLYGLYPRKGALMPGSDADIVIWHPEKSFKPFNLNLSMLHHNVDTYTPYEGKQFTN  
WPRYTILRGKVMWANGTLKGLRDGQYVVRGPNQLKKDSPRMGKDPRRVATWLYE

>8510\_t gene=8510\_g

MPPISAYFGHLVDSLKVVSYTRDVIDQTSFKTLAGVAGIISSTATSTSPSAIADLSRCP  
GYELKHVAQTTSSITADLQLAGPCNVYGPDIKDLRLLVEYQNDGRLHVKIYDAAEDVY  
QIPPEVLSFPQGSNDTADPLLKFSYTKSPFSFTVQRSDTNETLFDTSADPLIFEPQFVHLRT

WMPTDPYIYGLGEDVDSFRRQTNNYKRTIYNVGD AFLPKNANLYSSHPIYLEMRDGQA  
HGVYIASSNGMDIFISKTDKGGQYLEYNLIGGVLDYFFAGPSPFDVGRQYAEVVGAPAE  
QAYWTYGFHQCKYGYQDVMVAEMVYNYSEANIPVETVWSDIDYMNLRRTWTLDPE  
RFPIHKVRELVDYLHDNNQHYIVMVDPPISVDDQDSYDKLMESEAYFRNNDGVSFLAG  
MWSGATAFVDWFHPNAQDYWSSLISFFDEKTGVDVDAIWIDMNEPANFCYPCEDAI  
AWSKAAGIPSPPLRDSWRELPGFPDALQPPSAKSISKRSASGERSGLPGRDLLNPPYPL  
GTVDGHYGGTIFTDRYQYGGYAFYDTKNLFASSMMQATRNAMLERRPNKRPLIISRSSF  
AGDGKRSGHWTGDNISWDHYRISIRQNIIEFAAIFQMPTIGADVCGFNFETWETLCTRW  
AVLGAWYPFYRNHADITAPFQEFYRWPQVADAARDAIRTRYQLLDYFYTEFHYQTVDG  
TPSTILPLFYLFPHDPVTLDIELQFFYGSALLISPVTDDDESTSVTFYLPKGIWYDFWTGEKL  
TIGSSSSSTTSPTQKKEEGEWITQHNIPSSIPVHIRSGSIPLRTNGANTTTQLRKLDFELIV  
APDEDGNAVGRWLDDGESVDTGSNTSEILFEYDGKTKKLRVGGFRFGYEAGVKISKVT  
VLGEGSSGAIPGGQGLQSPLSAKEGYGRTVGVDRGLNKGFSVYIG

>8511\_t gene=8511\_g

MSRKAESFDFMFPTERRRRRLPPNCRWPLSIALVAVTLAVIFFAYHNPSLSDSNILSGYSL  
EEIKPSSDARHGGDLNRLVAQLYKPFHPIDAEVFIGENEVEYKIAQNPPRFTKSLGRKVL  
LLDVDTRALNGEGGMMNEQIDYHALSSHTAGMLSHLYAMIHGYDYKFIQAPSYTDRH  
QTWVKVPMIREALKTYDYVVFMDADAVFHYHHLPLEWLFNHNWITDQTMLAMALDP  
EAEFNRDERGNVNLNTGFIIAQASERTTQMFNVWEDCVTDEKYANCSKWRYEWSHEQ  
AAFSNYLRYEYEQPNEVISLPCAEANGYPSQAELGCTGEFVRHYWLDKGATVGALKDA  
VTQYAALRLHDQFHRHMDHTLVNATGTTLPLQDGETVAV

>8517\_t gene=8517\_g

MPFLKLRDGAELFYKDWGNPNPPIVTFSHGWPLSSDNWENQMAFLADHG YRVIAHDR  
RGHGRSTQTDWGNMDSFVDDVEELFAFLKVKNAVVMVGHSHGGGEVAHYLAKYGTG  
RFKKAVLVGAVAPLMVKTSYNTEGTDKSVFDSFRQALLQDRAQFFLDVASGPFQFNRP  
GAKKSEGQIRSWWQQGMNTSFKSAYDSIKDFSETDFTEDLKKINIPVLVLHGDDDQIVPI  
EAAGLKSALLPQGLKIYKGGSHGIHNLNVDEVNKDLLEFIKS

>8540\_t gene=8540\_g

MALSNASTGLICRQLATALPSNVFFANSSAYRAMQDSFWSLQESSLPACIVVPTSAENV  
STAISILCSGSQGHHPFAIKGGGHSPNAGFANIENGVTIDMSSMDSISYDPGTSVASVGA  
GARWFSVYWYLSDYGMAVAGGDNGAVGVGGLLIGGGMSHFSPRVGWACDNVNFVFEV  
VLVSGEIANANETSNDLWRALKGGTSNFGIVTRYDLAAFEQGGIWAGNIGNHISLDQV  
LEAFANIAGAAEYDEYASIEAIEFTGSEWTIINEVAYTKEVNNTPAVFQPLVAIEPQTLN  
TLKNTNLSTLANETTTISTTNILLQATYGVLDLQLLSIFDINNATVEKLAPEVKGLFKWII  
AFEPLPAIWMQYGDKKGGNSLGTNPSDGNFVVFIEAQWNDTSASDRIQFATSQVFQQI  
NLMAESKGLKHDLIYLYANADQDPLASYGEDSLNHLKSVAQKYDPKGIFQTQVPGGF  
KVSKSGY

>8547\_t gene=8547\_g

MKTTLITFAALSGLAFAWMPGVHKDIVSLSGENLFNKTD PITKRWLPSSGKIRGVNLGSL  
FVFEPWLAESSWNSIGCSGKNSEFDCVKALGQDTANTNFQDHWGWSWIVEDDIANMSSY  
GLNAIRIPVGYWVREDIVHSHSEHFPQGALSYLAQICDWAADYGFYIIIDLHGAPGAQVA  
HNPDTGRFAPTPRFYVDYQFERALEFLEWMTTQIHSNSSFRNVGMLEIVNEPVRNSSSVG  
TMRSTYYPDAFSRIRAAESALNITANNELHIQMSSSLWGS GPDTEYLT DNYFAAYDDHR  
YIKWDTSVTVSQESYISTSCNDDLSGNTSPISVSEWSLSVPDDVQDTADWD PNSTNQDFYA

KWFAAQVIAYEKQDGWLFWSWKSELGDYRWSYRDAVTAGVIPTDLDSVYDLGVC

>8607\_t gene=8607\_g

MKLFIAATFLPAFAAAATSVSISAGKINGGRCESAKDTVFFKGIPFAEPPVGD LRFESPKPY  
NGKFPEEGLNATTS AISCIQFTHDYTP ELPTSEDCLYLDIWVPKNVTKHSRLPVK VWFIFGG  
SNTEGSISDSLYDGCNSPDGDSILVTINYRVGPLGFMALSSAGIQGNQGIQDLVLGLEWV  
QSNIAAFGGDPNQVLLFGQSAGAENAYVIASLPQAPSLFKSVISESGGGRGLINNATTQMI  
GASYAQALNCSVTDKACLKLTADELTTAYNDDDFLSQGVGNWGF LGILGPITHAFYP  
YADGKIVPEDPYTSGVKVPAVFGSTKNDGHIYSIDWANSSGNVPSLAAYEEFLREDFGQA  
ASLVEQQYPLSLFESTIGNSPLLGELSAALGLNKTEAAVIVAMATVITDSTYKCPAYYGA  
AQATRNNIPVWTYEFTHNSTCTWIDTIPQEYVYLYSATHTAEIPFVFGNMNFDLPNGDC  
TFTQSEKYL SQMRS LWTSM AKHADPSTASLPWPRFHTTEKNLTPGMIFGESAVAGTV  
DYTGCDLWPKVHAILAGSNSTTTLSSRTIF

>9671\_t gene=9671\_g

MTMPSLRVRILIVLCAVLVLSQRWWAPLGNTLFNLVSLSSRWRNASVESWISKDRDDFD  
VTFASYPVNQTTAGHLYQDVVPPILHHIHLGPNAPRAEWLGAREECIKYHHNWTALIWD  
DAAAEKLVNEEFPHLSDMWHNYRYPVERVDALRYMVLQTYGGVVLDFDLACKRSLGP  
LRRDFVAPAAHPTGFSIGFMMASKGNAFVKDLVNNLAPYNHVVWFYLPYVAVMFSTGC  
HYASTIFTLQEDRASLRILGGITGSPRLHMLNGFVDTPLFRHLGSSSWHNFDAA LINWIGH  
LRRSSILVLSFIVSLVLT VYYLTSLRRRRCAARRNRSMADKFDSESGMSCLKDA

>9672\_t gene=9672\_g

MAKSRLAVATHLGRRAYRHKLSVISFIVVFFVFPVFLYTLLGTILANDPRLVPHAIRNA  
RSVLLIT AHPDDESLFFSPSILHNSEKPHVNRHLLVLSG NFNGLGEHRRRTETKASCAALG  
IRDDNCVILDNKDLQDNPRQWWDD SIVENILEEYIKKWKIDLIITFDHYGVSGHVNHRSV  
SKGVKKFCDEHDMPPVYANQSKFLLRKYSSLFDLIPTSV PFTWRILEALIRPIPGYETS  
VSVTEKPVPPPEGGDKYGDKALLVTDWGLYMQGRQAFKQHASQYSWDRVLYLIVSRY  
MWFNDLKRL

>9683\_t gene=9683\_g

MTTITVLADDNSHQPTITLNP SHTIAKIDPLIYGGFTEHMGRCIYGGLYEPDNKHGLVNA  
KGFRTDVIDCFKELNVPVVRYPGGNFVASYRWQDGIGPKDKRPSRPELAWNGIETNQFG  
TDEFMDWCKEVTGPYLC LNMGTGTLEDALAWLEYCNGSKD TTYANLRRENGHAEPY  
NVRYWALGNEMWGPWQVEQHTKEDYAKKAIQWAKALKLLDPSIQLISCGQDGCSDW  
DRYVIQQCHSWVDMHSIHFY SAGENHYRNISPYAAERAIQVTSALIDLARCEIDYSPWP  
DTARIYKGRSRKRKICFDEWNIWDAERAPGDKGAEEQYTLSDALAMGIWLNIFIRNC  
KELGMATIAQSVNVISPLMTSPNGLFKQATYWPLLLFSKFMRGQAIAVHVQCAA YEGET  
TPEWIQSTSTIPKLDVSAATDGEWVNLA VVNVDENSNFETELTPGLQSEVEVFLVGGES  
HQLTDFNSKGKEVVKIQESVWRPEGSKKFTFQKHSFTLLRWKI

>9692\_t gene=9692\_g

MADSNSILFH SATILTLNATRQIIRNGYIHILADRIASIGKNYPVFHLP EGTRVVDCKHKIII  
PGLINTHAHLVQSLLRGLAEDLPLHNWLCDAVWPLEAAYDSDDGADAARLTIAEMLKT  
GTTCLDPLMLTHRAGFERVCEVVGDMGVRGCLGKLVKFTETNRQLSITDPRDKDLVAM  
SIPALVEAHVAFHGSYNDR LHVWAAAGTPRGAPKSAFRELGDACDEHGISITMHCAEAP  
RDLDIYRESYGCSPEFVQETRLCPLPARSVEAGRKS RQLVLAH MVNLDLGKDIPLLAST  
NTTVAHNPSNLKLASGIAPV DMLAHSEYINVS LGTDGAPCANHYDMFQEMHLAAILH  
KGVNRNDASLIPAETALEMATLNGARALGLEDEIGSLEVGKKADLVVLDPYGRGNMGVA

PWDDCDEKGEVSPVTTVVHGCTGRDVIDITVVDGRIVVMDGLLVDGGRVKELDIIGKA  
QRAARGILQRSNADRGEDQKIGGRLRKDWSYI

>9700\_t gene=9700\_g

MCDFSKYGIPSDEWLQLASTLPSTPDLSEELKKATNEARAAAAEKLKQDLASKVAM  
QDHPIPARDFQIQARTYRPLCSSIQSDEKFPVYMHFHGGGFLYGSLESEDPLCSIVALKL  
NILVLHINYRHTPEYTYPTAWNDTEDAMVWLCENAPYICADLDRIVIGGSSAGGQLTAS  
LTRIVTSQPSSLQLSPRPTILGQVLMIPSLVFADCYESQMRQIKEPGLCSYNQCAEANLLD  
SKTRKMFNDALKVENPDPDDKRLNPGNLTAEARRIPPTTFGIAGYDALRDEGLLYAKF  
LTEQGVPTDIHVFKGLPHGFRMMGNKLSASADWDEILLGGIQWALSRPAGAVEFVIKEH

>9701\_t gene=9701\_g

MQISTALISLGLMASAVVAAPHRLKTRGPGGEVVVYWGQNAAAAASENNDLSTYCTSNS  
GIDIVVLAFLYEYNGGITIPSGVIGEDCSISTSGETNCGSLASQISTCQANGVKVILSLGG  
AVGAYSLTSQSEAETIGQNLWDAYGNTSGGSPRPFVSVYVNGWDFDIEANSNGNQYYQ  
YLISKLRNFASDSAHTYYITGAPQCPPEPNMGEIITAAKFDYLWVQFYNNGYCSYPNTL  
NYDDWISYVAGTPSADAKLVIGVPASELGTGTSSGAVYYQSPSVLASTVASFDTTSNW  
GGIMMWDAAFSDANVVNGCNYAQAASILKTGSPCGGTGTTTTPTPTTTSTTTTATS  
TATATATGTPVAQWGQC GGEGYTGSTVCASPYKCVESIYWSSCQ

>9710\_t gene=9710\_g

MNLLYLLEVLAVWASRTPEQNSLGSYNVDPDSSSISGFSSGGFMTVQLGVAYSDFVNV  
GFGILAGGPYDCARNQSAFDKCMFNEIPSIDIPIANVKAWSGNEIADITNLMYRKVYLQIG  
SADAVTGSNVMGQLREQLQSFTDPDNVIYVTTNGATHTFPADFDGQGDNPCTSESPYL  
SNCGYDGAGAVLHWLYGALKPRNTGSLSGRVIPFSQTGPYGAPGMDDIAYLYLPASCQ  
NSSTVCKLHAVLHGCTQGYGMIGDKFVSNTGYKLWAGMEWSPEVLKVYTPNSHLIDTN  
DIIILFPQAVADNTIHKTDWGTTPRNNSLGCWDWIGQYGNNTDQIGGELSPNCDCSLSPRN

>9720\_t gene=9720\_g

MLMNRPKIGKNCITYGTFDLFHDGHRLLQRARSLGSHLTVAVTSDTFDLTRGKLNVRQ  
SLAERLQAILASGLADKVIVEEYEGQKIQDIVKYEIDVFLGSDWTGDFDYLRKYCEVV  
YLDRTPGISSTIQRGLRILGVVCGGRIARRFVSVGVVIEAVYSRSLESATSFADKA  
NISKVCASFDALLESVQAVYIASPHSTHFAYAKSALEAGRHLVCEKPLTFLEEEATRLDS  
LATEKSLVFIEAIKTAFMPGFQRMIALAQAQSGAIGHVCSVTATCTMIRTVKEREYDPNQDG  
GSLTELASYPFLAVAKIFGTDEKPHITSESVNHVQTGVDILSRISMRLKNAMVSCTVGIGV  
KSEGV LIVAGTKGYLYVPAPWWLTSSFELRFEDSVARQSFTVPMKGDGLRYELAEFIKLI  
NDGGHHDSCNLSARESIFIAGCFERARKGNVSIQVVSVDNE

>9723\_t gene=9723\_g

MRNFTTFCLALAAIAHARSALAGSFTYNATTFLLNDEPFQIIGGQMDPQRVPWQDWRTR  
LAMGRAMGLNTIFSYYWNNIENQPGQYVTNENNNIYAFVQDAQEAGLQVVLRVGPYI  
CGEHEWGGFPAWLNNIENMTVRSNPNQFLDRTQTWLDWFAEWVKPLAIANGGPIIMVQ  
IENEYGFYSDDHSYTNALAAQFKSSFSGSGVVFYTNDSGSSQEALQAGAIPNVLAIEDGTT  
PLSSFQSRTSYLGSSQGNLDGEFYITWIDHWDPAAHESDVNNTAITYAQSTLQSVVS  
NGDSFSIYMFGGTNFGFQSGSDFGNGTQPVTTSYDYGAPLDESGRPNDIYYALRETLGP  
FSTDLPDVPSIAPMIAIPSIDVKPAFYLFDFGLSPHSMESPRNMEALGQWYGFTLYRTIVK  
GSYSGTLQPGVAAKDRIIVYVNGERKGVFDSMYPNGYQQVITLNLKPGDVLDLLNENM  
GRVNFDPDIPYQTKGVFGDVTVGGSTLTGWL VYTLPLDNGMAPPQARVPTDISASSPI  
FYTGTFDLPTISDTWLELPEWIKGVVWINGNNLGRFWTIGPQQSLYMPGAWMQAKGNM

IQILNLEPTGREGTVSGVSTRSWFNPPDPDAPQTK

>9725\_t gene=9725\_g

MRGYQYTGNTNFFNQAKAGYDMAFARGWDTAHNGGGIWELQPEDDSSPAKCCVLSN  
NSLGRVACLIIYQSTHDTTYLDQCTEIIDWVWHNLFVSSTGEVYGCIEQDGTIDYGDDPY  
NQGAMADMANMLWLNNDLFLNDAKIAISYAFDKVTANGIFSSPSNTVGWTDLTLTRG  
MGRTVWNNRLWSIYPSMVDNANAIVQNKRADLGITWNGWDTPTPEVDLTTNQVAD  
AAAWLQWVPANQPNDIAGLHIITNVETGLAIDSMGTFGSGQTVNQWGVNDGQNQRWL  
LSQNSDTSWNIISTSTWQALDCPGGSNAENLTMIQWQPTRNNNQRWWIDEQSDGTYKI  
WNQASQMALDGASATDNGAPLIQWGWNGGAQQRWNLE

>9767\_t gene=9767\_g

MGEQAQVATGWAAWSSKKKTHITAMVSSIVALGVGLGAGLVGLHHNHAATASTST  
ATATVSAAAAATATSTTISTANGTYWQPTAGTTWQIELLYKLNDSIDVQVYDIDLFD  
TEADQISSLQAAGRKVICYFSAGSWENWRPDADQFNSTDLGGDLNGWPGEKWLNISST  
NVRNIMVNLHMAQQKGCDDVDPDNDGYSNEENALGLTQQMSIDYVNFLEAAHNL  
NMSIGLKNAGQIIDSVIDNMQWSVNEQCQVYGECDTFSAFDANKPIFHIEYPKGDDTN  
NNNDVTSAQKKTACVFEGSDKFSTVIKNMDLDNWWVEFCS

>9782\_t gene=9782\_g

MESLFLATAPPLDLEWLAYESSAGLNNRPEKPSSTSPDRQHVVYAGDCRARTIAALSAAP  
YSRLANAVRSRYFTVPSSVDGFQIPVIEYSPFVSDRSSDATSGVVVFYIHGGGLCVGEADS  
EELSCRRIAADAHATVFSVGYRLMPTYSARTCLSDCIEAFQRVVTEYTTTQEKILLVGSSS  
GGELAALVAQQLPSVIQGVVLRCPVTSDAFSGVDKFPKLNQHLHTSATDPSFWNSLLG  
PMLREVPRDGLERMPLEAPLDVMKRHPRTWIQLCTNDSLFSGLCYAKALEDAGVEIK  
ADIIRGWPHTFWLKAPLLPRALEAEKNMLEGLVWVAGQSS

>9800\_t gene=9800\_g

MASPSLESSIEPWMASSHTCPESLRGICNLIKPLIHPVTAESFTSRTGQVYELPSKSPRFTYS  
LGRKILILDVENRILNDSGGLDKEKPSTDELHGLTFGRNLNHYIYAMLHGYYQLVQTPV  
SPLYLGGWNKVPAMRQAIKTYDWVVFMDGDAIFTHLHLPLEWLMNRWDISPDKTSL  
ALDPDTSPIFHNGKGDVNLNSGVIIAHQTPRSEEFFDAWMTCPDEKRYEGCAKWRTHA  
HDQSVLNEYLRDYDPELKFPLPCTEANRYPGSGDCEGEFISHFWPFKEMIPGGAKEVIAQ  
YFFPPLQAFSHDGDQLVLPAGTVALV

>9803\_t gene=9803\_g

MSGYHNGHYGGPTSPYANGNNGNANPNAYYGNNNYGYGEEMVEFDVLNHGHGHGQ  
DAAYMNTVNMNDSYDPNERHMGRSPPKVRPGLQPTTEEFVSPVGTPLGSPGAHQGW  
LPSRRGHDRHIDSFHSVSTPAGRSATPAFYQNNQSFQSHQSLAALVDQPPSPLYAKDW  
VQQGSIARVADRDDADIWKGWRRYVYMLVPFLTFGNTAIYVFYLVLRITCVILAQNAA  
HQTYAGAWVFIALELATAIPSMHNAWTMWALKGRQRPKLRLTGDDCPNVDVFITCC  
GEEDEVVIDTVHAAADQDYPIDKFRVIVLDDAKSSSLEASVRQLALTYPNVHYMARTKI  
PGVPHHFKAAGNLNYGLEQTRLMPGGAGQFMAALDADMIPEQQWLRATLPHLLIDPKM  
ALVCPPLFYNCPPADPLAQSLDFVHVIEPIKDALGVAWCTGSGYVVRREALDDIGQFP  
LGSLAEDVATSTLMLGKGWKTAYIHEALQFGTVPEDYGGHLKQRTRWAIGTVDTAFKL  
KFCLWGDIAIKQMSFAQRFSGLYATLSLYTILLTASLFAIPIILWGRPLVAYATTEQLKY  
LIWACFASTMSNRLCEFALFIPAGYHTGQRGSRYGMWMSPYLALCIHSFFLPKWLGGQ  
TQAFKPTGSLGSALEERDPKRRKGMVRRLWTLVNYMAMFHFAFVYMTIVAVCLSSYR  
CFYQNDPNNFKNIFLCLITHAFWPPVTFLFVITSLWTPIAAIDPPSPMPDREDLLQRDPKT



GVAHPTQSKKIAFAGQEAWFEFEYTFATLFTIFVFVYSFFYI

>9804\_t gene=9804\_g

MAFRWIVNAGLIAIPIGSTLGVLFIDASRQASGQRPLFSGGDSNSGTGGSGGGGGGGGG  
SGGSGSSGSSWSDSTGAYTLGSHYNDTELGVTLRSYCDLSLILPPAKGGLNYSLNPNQ  
WGVAAVGGTNADSQMCNMVTTFLNETYPTKLSAPQWSVTWQYTPFPSTQPVHGYPNIE  
VSDGLPLTSLDLTSLNVDLAWTYALGNTPKDTSDTPEFDSVALNTNVAIDMFFDSAREN  
ATNSSIAKYEIMVWFAHYGDAAQTIGNASGIVDTKIVNTTTFDLYYGNHTASDDVLQHV  
YTWVASEDTASFTGDIAPLIAALTSKTGTSYPTTSDYMGVFGFGSEAYSANQNVTFYVP  
KLQVDIQT

>9834\_t gene=9834\_g

MSPPVNRAWWKESSVYQIWPASYKDSNNDGIGDIPGIISKLDYIKGLGVDIWLSPSYKSP  
QVDMGYDISDYYSIHPPYGTVEDVDKLSGCHERGMKLLMDLVVNHTSDQHEWFQKSR  
SSKNNEFRDWYIWKPKFDEQGNRHPPNNVWSHFQGSWKYDDLTAEYLLHLYAEQ  
PDLNWEHPPVRKAVHDIIRFWDKGCDFRMDVINFISKNQEFDPGPVTNPDPWQWG  
YSHYANGPRLHEYLQEIGKILQEYDAFSVGEMPFATTLEDVLKAVRFDRKEINMIFDFEH  
VDVDHGLDKDFGSGSWKLTDLKRILNKWQTFMYENEGWNALYWENHDQPRSIDRYTG  
ASAEHSVIAGKMLATCLALMAGTPFVYQGQELGMRNVPVEWPIEEYQDIDCLNHWKG  
HLETEHDNIEALTSYRKEYQKSRDNARTPVQWTAGPNAGFSDVKPWMSVNPNYTQIN  
AENQVSDPTSLYNYWRSVLSLRKKYLDIFVYGDFVLVDRDNENLFVYTRQFEDQKALV  
ACNFTDRTVEWDSAEDLVGEAKEVLLNNYGTGEKFKGELRPYEAVVLLVA

>9835\_t gene=9835\_g

MAIRIGIRVILLVLASLPLTQAQTVHDGSQIVAANATTVAPEAVKVSPDSADSGVAYFSFE  
ATQLTPEVIANLTALNLTGIEFFNFGDASASSTAKRGSSAACKALPGDSAWPTDTIWGV  
LNLLLGDNALMKSVPVAAPCYSDWDQYNPKCADIASQWNSPEFQSSQPTGIDWPLFE  
GVTCLPPTLGPNASCTLGGMPSYIVNVTNVAQIQLAVNFARNSNLRLSIKNQGHDFNA  
KNVGAGSLSVWTKHLNDIEYLGPEFSLGFSFGPALKIGAGVQMLQVYEYADSIGLDVVG  
GIARTIGLGGGYIAAGGHSPLMSMYGMAADQVLALVLPDGRFVSVSETSYPDFLWAL  
RGGGGSTFGVVTSLVIRAYPKLPVTILTFTFGTNDNVTNETFWQGMDLVWATFPAYADA  
GHYSYWSVSCASEASCSTAAHWANNYTTVELQEFVAPLFANLTALGMPPQNVVYAE  
YDGVLSAFTTTTPADTEVVGTTWTSVHGSRLPRHNWQNETSLVAQSSALRNAIDAGL  
MLGYNFKAAANPSINQDNAVNPWARDTLSTMLGAVWSQSATANEIAAANKLLTQRL  
QTRDVTGSGAYMNEADVNEPGFQSFYGVNYPRLYALKQRYDPWGVLYATTAVGS  
EDWYVQGGQIPYYQTQNGRLCRVTS

>9836\_t gene=9836\_g

MLPLRRKSRRWITIVAPLIGFVLLQFLRGPQWFFVASRTPSQISPRGASPDQQQQPLQQ  
NINKVAAPTKQAQREQQPLVGSPKQKPKKPKTKFACPSLPGIEDVLVVLKGTGVTEAL  
DKVPIHARTTFRCPVNYVVFSDYTEQIEGVQLFDVLQNVQNDVRLTIEDFDLYNRLRVS  
GRAGLQKADSTEEENGVFMPNPGWKLDKWKFLPMIDEALKAKPDAKWFVMEAD  
THIVWANLVAWLARLDPEPLYLGTETQIGDVLFAHGGSGFILSQRAMRMVSRQYAKN  
TTEYNAYTNEEWAGDMVLGKVLKDAGVDLTFTWPLLQARLGEIEPLTNQFYRQPWC  
FPVVGFHHLSPEDVEEMWKFDQEFVVKNNKYLLHSDVFRERILPQMRPGIQDWDNL  
SGDLVEDILVENVDECRRVCEEDGLCRQYSFRWSEDPDSEGEWRPECRTFESPRLGVAR  
EGTQSGWMMTRIEVTTGARGECESEWE

>9864\_t gene=9864\_g

MEPLTVLVYYILFIIISSTHAMMPLRKHRRGFVIDDFCRSSVNNLGAWHGPGENLSIEYDQ  
DDDDDCSVRLFPSNPDHNYHTQFSYSCFDLSKYRKMFLHVKYSGSDAFTISLYQHNGAC  
NPWRAPFPPTFDSVEASRYVTDDGGDIYIPLSHFYIDLKRASSVAFHGFYTTQETILHKVE  
IVKHVPDDVDVPRKLPVTGMVLNCKRPNSFAFGIDDGDPALAQEVMEILEERIKVTFV  
VGQGLRDPFTNFTKLYSEMLEKGHQVALHSDTHPKMEGLQTIDEIDDEITGGQHALKDI  
LGVKSRYPFRPPYGTVGARMRQLAAHIDNPYIVNWSVDVEDWLWANTDEPWRLRAF  
QRDVERGGDLVVMHYLTWSTVKYFRDFIDVARRKKGKQIMRIDQCMMDPSAPKLSSLKS  
WQDDGEQPKMLRTQHPNQFKAEEVELIDEMGE

>9866\_t gene=9866\_g

MRLPIIHIVFLLSYADALTPSRFLLPNHAVQPMSDETQTNDAEHMANHGHPPSAEDAKQ  
HFPQSFSSPFQVVGQSGVPAMAAALMPNGNVVFDKVENYTLVLDNGQYAYSAEYN  
LTTNTAYGLSLNTNPFCSGGAFLADGRLVSIGNGPLAEIDPTVGDGFQIRYLERGVYH  
EDWYEPGHSLSLTPRWYASVQMLQDKRLFVASGSLNGMDPMQSENNNPTFEILGADGMP  
GNSTNLPILSRNQPYMYPFLLHLLKNGQLFIFVARSAEIYDPDSQGTILQLPNLPGTYRT  
YPNTGGSVLLPLSKENEWEPEIVICGGGAYADIASPADRTCGRIPLSESPWYMEEMPE  
PRVMVEGILLPDGKVLWLNARRGAQGFQTAQEPFCGALIYDPEQPSGNRWSHEGTSNI  
PRLYHSVALLLLDGTIMIAGSNPVEQPLLEPDYSSPETSIVTEFRVEVYTPPYLSGANASK  
RPQDIRLSQTNLTSDDDEPNISFTSNTNSTDLKIALYHGGFITHSLHMGQRLLFLDHEGF  
TPGVVEQVVKVYMPASSSIAPAGPYVIYVVLGDGVPGLGQFVVVS

>9871\_t gene=9871\_g

MTRSIAYYESWASHRVCNKYMPSDINSTTYTHINFAFALIDKDGKVMLSLQNDTILFDQL  
KDVRDKSLNKDIELWIAVGGYAVGSAPFAKLATTQQRKTFIDSACGFMDKYGFKGMD  
LDWEYPAATDTGGTTADTNMVSLLVKEYREQCKNKGLSVTLPGGTFYMKGFDLKGLE  
PYVDWLVNVMAYDLHGSWEKPTIAEPHTNLSDIQQSLQLVWNAGVSPGKVLGLADYGK  
TYTLSSGCTTPGCAATGPGLAGPCSNEAGSLHNAEIDAILKKHADIKPQDKKAAVKYF  
SWDKTQWVSYDDKETRQLKKQYAADKCLAGTLDWAVDMNVISSNTKVDL

>9887\_t gene=9887\_g

MPLNILCFGNSLTAGFRSYGIKPNHPYALTLKEQLLSAELDASILGGDGLVDIDVEGQPG  
DLVNCPPGRFLERLKRRCYGSFSADQIYTGLKTTWSLALSSSPMTKVLALTVPECAKSE  
KLDNRNDALNKSILGHEEERFYFDLKSAPYHDMDEQRREEIWDDGLHFTDKGYDLMG  
EVISERLLELLTKPSST

>9895\_t gene=9895\_g

MLRTTLLLIAATTVSALELGCFSDTSETLSNFVSNNGSYIFQSTGYCQVCGTIGHSYYALK  
GDDCWCGDAIPPISDMVDDSNPCAGYARQNCGGTNAFEVYLSGDTTAIESIASAYSA  
AATASATVAASDSVTILSTAAAASSDSSSVSSAASTTSAAVIPAATTTKASSGVVTPSA  
TSTSTSVHTGAAAAVNVQIGFGLMAGLMALTSSL

>9909\_t gene=9909\_g

MSHGILPYASFLALVGGIAEPFLALNSDFPDPPLIETSSGYYAFGTSGNGVNAQVASSPD  
FNTWTLLSGTDALPGPFPSWVASSPSIWAPDVLVKADGTYVYFSATAASDTSKHCVG  
AATATSPEGPYTPVDSAVACPLDQGGADADGFDSDGTIYVYKIDGNSLDGDGTTST  
PIMLQQMEADGTTPTGSPQLIDRSDLGPLEAPSLVLSNGIYYLSFSSNYNTNYDTS  
YAYASSITGPWTKQSAPYAPLLVTGTETSNDGALSAPGGADFSVDGKILFHANLNGQDI  
SGGRALFASSISTASDVVTLQ

>9926\_t gene=9926\_g

MYSKFWPKGGLPGILHHYTETLVTFEYTSSAVQQPHSILFVGGLGDGLATTSYTSDLVRA  
LQPTQWSLFTLNLTSYQSWGLGHLDRDTDEIAQCIQYINEYKIHKFGHDNGKIVLMGHS  
TGSQCVMHYLYRPNPHTTTPVFDSGLEHIKRRALDGAIMQAPVSDREAILWVLTEGIGG  
KTPSEMREIFGELEKIAKEADRRNKETQTPFDTMLPLSLTSQIYPANTPLSARRFLSLVSPE  
SPQSPREDDLFSDDIGEEQLAKTFGMKQQGLLKDRLLVLYSGADQSVDPDWVDEKELLS  
KWRDAADHNGRFQVWDREHSGIIPGASHALSNDQAEPRKDLVRRVMGYLQRLEKS

>9942\_t gene=9942\_g

MRASLPLRSFSAFCRGQVRPTLTKSLRTRNTQTAHSTRRLNSSNTSSGNSSWTTTRALAL  
AAVVGAGAYVAASSRSTSLVTVAATAPAKDPIYGDITLFEKAI AELRAELGEDAISTDDD  
DLHEHGYSEWSTVNAERLPVAIAYPRSTEEVSKIAKVCSKYRMPMPVYSGSSLEANFS  
APYGGMTIDFAFMDKILEVHADDLDVVVQPSIPWMLNSDLAHTGLFFPVDPGPSAKIG  
GMVGTNCSGTNAVRYGTMKDWVINLTVVLADGRVIKTRRRPRKTSAGYNLTGMFVGS  
EGLTGIVTEITLKLAPIDELRVGIVTFPTVRDAAMQVIRKSIPVQAMEIMDEVQMN  
VINRAGGTGRTWREEPTLFFKFSGTTAQVADSIQNTKNIAQNNKSTSFEFKDDQEAHAL  
WSARKESLWSNLAMRPEGGEVWSTDVAVPLSRLPDIIEKSKEQLNDLNLFASILGHIGDG  
NFHSSILYSRKNREETERVEKVVHDMVDLAIEMDGSGCTGEHGVGLGKESLIKELGNDDI  
DIMRSVKRALDPHWLMNPGKIFEYSRDSKPADTTDIESARLVGAEKKNST

>9975\_t gene=9975\_g

MAAKVVPGSNYGSKFANFNILQANYKVVDGHEIRADLIIPKSLPAGKAPVIARFHGGGL  
VRGESLYEDWFPVWVLELAETYNVIVSANYRFLPEVTGLDILDDVDDFWTWLHSQDL  
ATLLQTQKEVAVELDLRIITAGDSAGGLLSIYLILSHPDEIRAGTAA YPAIGWDNPPLLP  
TKRSALVPEVPATFIDEYVSNIPGQVSSSDPDLQRLQIGAAISANQAGFKFYIRGSENSPT  
RDRLYQLARLEKPDARLPRGGLVILHGVDVIVLAKASERFVEKAKDALRGRQGGDNIV  
LVLRPGPHGFEDASIKKEWLNEALKTAVKRWLE

>10014\_t gene=10014\_g

MSARLYLIGLGLHSATVNGEPVSNVAVLAPGYTAYSETLLYSTYDVGDLLKAGINTLGVE  
LGKGIYDPEPSLGGRYMKFTGSPRQLMLKAQLEYTCLDSETRVIIPSNTTWLSNLDGPLL  
ESCWWGGEEDARQQIPGWPTTISDLAWQAVSVTPPPATSLIGQPYTDLEVVEQIPCV  
SVSQNAEGWTFDFGINFAGWFALNIDVPAGTRVVMWPAELLD SNGWAAQTTTGSPIFD  
AYTSNGTPGTYTPKFMYHGFYLSVQNLTSVPTTRSIMGLSIRQSVEAIGNVSTSNLLN  
NIHEIIDRSIQSNISMFDTDCPHREKLGWLEQDHLVIDPVLWSYDMEAATRMVIKNVDS  
QSTSRSMGNQAAHSGFIPEIAPEYVAFGYPPFRDDPNWGGVVVRLPLKHYKTYGDIRVLS  
DNYAAMQSYLGYLSSLTSNYTLNYGLGDWETLDTSPILGYSSDAATYTQLEKNIISAFNN  
ATYNSTGHYGCQSQAQALALDIGAPTSPEIFAQVLSFLNESLWETDSWTTGEISLPSLFR  
VLHAAGQDEPLYSLMVNTNYPYSGHELLNGATSLWETWDAVTSHSSLNHFHMGYGDV  
WLRQLSGLQEDNSIGWGNITFRPILLSNLTSASASTITPRGLASASWTTEQGFLNYTIVV  
PFGATGTVSLPFQNTITESGTVNSNTSGIVSVERVNSTTILVVGSGTYTFTTS

>10015\_t gene=10015\_g

MTAYTDSRFSSKAATFLRLGLALAGIYWLFSFLHYPNFSGQRADGSQPKVGVKVTM VY  
GNRSIYDRAVNTNIVHSQRLGYPDFILRSPILEGVWSKPAILLSVLLKELEKPPERLEWL  
FWYDADTVLMNPNLPVETFLPPPDRDLVHLLLT KDWNMNGNFPFIRVHPWSVELLSA  
VISYPVMNPDVELFWSDQSALSNIENKYFSKAVVYCPLRWFNAYMGLPNGEGLNPES  
PEHLQVHRGDLLVHFPGTGDKLDETMGPYLDIAEAHRGEWERSLEDTDYVQETESFW  
RRH

>10022\_t gene=10022\_g

MVHSLISLLAIAAAGVSAASISSTSSSTLSARNTALIPGCENGPTSRQCWKGKYDINTNYYD  
EIFYTNHTVEYWLSLEEIDCAPDGYLRKCMANGTMPGPAITANWGDEIVVHVHTNMMK  
TNGSAIHWHGVRQLNNNVNDGTPGVTCPIAPGTSMTYKFHAEQYGTSWYHSHFSFQL  
SNGLYGPLIINGPATADYDEDLGAVFITDWDHVTADQIWATIANFNVTFDGSSTGLINGM  
NTGNTALNTDADPNCLSDGKKFELHFEQGGKYRLRLFNVAMEDWVQFSIDNHTMTV  
IAMDFVPIVPYETRIFIDMGQRYDVIVEANEAPADYWLRSGFELCIPNGAGANNITAIV  
RYDNTSTADPTSSVDGAIIGWDLVCVDEQPTNLEPWVVDLDMAKVVEGVQTEIVTGFY  
DDNTYLRWSVNGGFSFMWVNWVSNPALKDVIAGDLSGIPISDNIFEVGSNSSAKSTLRNET  
EWWVLVIEDTTPITGISHPIHLHGDFLVLSTGYERWTGRTYGWQLTNPPRRDTATMPA  
NGYLAIAWPLDNPVWALHCHIAWHSSQGFATVLESADMMPQLGGDWSQEIDPVC  
KAWNEYAPTAPYQQVDSGI

>10028\_t gene=10028\_g

MPSKSKDLSVRPVSRRGNNRSRSPNPKSKKSALKKAKDYSSEGVTNDIFNL  
PASDYIWLAGLTLGAAVRLFRIFYQSSVVFDEVHFGGFATKYIKGRFFMDVHPPLAKLL  
ITLAAWLAGFQGFDFDKDIGMDYLEPGVPYVAMRLLPAILGVLTVPMLFLTATGCR  
STSVMGAVLVTFDNALTTQSRFILLDSPLIFFTALTALSFTCFNQHQQPSKAFKGA  
WWFWLAFSGLSLGATLSVKWVGLFTTAVWVGLTILQLWVLLGDSNTVTPRLWFKHFFARF  
CLVVIPLSFYVAMFGIHLCLVNPGEEDGFMSSSEFQATLNSKGMQDVPADVYVGSRVSL  
RHNVTQGGYLHSHAHMYPTGSQQQVTLYPHKDENNVFLENQTQPLGVDGVEIEGP  
MAWDNGTAEYIDGAVIRLYHLMTHRHSHDERPPMTDADWQNEVSAYGYEGFPGD  
ANDLFRVEIVKSSSDGEEAKKRLRTIQTKFRLVHVMTGCALFSHKVKLPDWAQDQEV  
TCAKQGTLPNSLWYIESNAHPALTEESEKVNYPNGFLGKFLQLQVMWTTNAGLTESH  
AWDSRPPSWPTLLRGINFWGKDRQVYLLGNPLIWWSSSTAAIALYVAFKGFVLRWQR  
SFNDYKVNFKRFDYEVGTTVLGWAFHYFPFLMARQLFLHHYLPALYFAIMALSQT  
FDFILNRVQLPVIKKSIVGSLITIFLALSAGVFIYSPLTYANPWTRDTCQSVKLLDS  
WDFDCPIFHTNLNDYITPYSNVNEPVKSQAPAVPIQNQQQPVGDSAEGNKQFVTPQ  
PAGSNRIIGREERVEYRDEAGNLLDPKEVARLQAEGKVSLSLQTKYSTQTRIIDASG  
NESVKIPEHAPPHPDVEGQNPETNRNGDESVAPRNEPASAAGSEKSVYDDQVASAPK  
PASEAQGATA

>10068\_t gene=10068\_g

MLHRLASPLIAALVLSQSVLSFPLTRRLDNGSPLRNVQYVQFTDPNGNWFNLTDLATQ  
GTGITHLILASLHLDNPTEIHLNDNDIESAYWDPLWPMVSSLQAAGVKVMLMMGGAAQ  
GSYANLQNDFDYYPILSILKNHNLGDFMDVEENVSESVLLRLAQQLDADMGTDFILT  
AAPVALAMNSGNLNDVSWSDLHDVATSSTRPNGKLFNWNQYNTQFYDYGWGSAASTSSY  
DTVISAGWDPSRIVLGVLTAAASAGYPWEPTTVLSNTIASLKAKYANFGGVFGWEYGLAG  
QSDGQTPVDWVGAIGSYLAA

>10070\_t gene=10070\_g

MLLKQFVQLAAVLAIPAICNASALAINSRQSTASKYVFAHFMVGVENYTLYDWKSD  
MTIAMDIGIDAFALNCASVDSYTPQLALAYQAAEEVGFKVFISDFAYWTNGDTANIT  
QYMQTYAGHAAQMNYNDAAVVSTFVGDSDWTPVKAGTNHSIWALPNLQDPAEWSS  
DAQRSVDGAFSWYAWPTDGGNSIIPGPMTTIWDRIYSDLGATYMAPVSPWFFTHFNT  
KNWVFICEDLPTRRWDEILTMQPDLEIITWNDYGESHYIGPFSSGHKDDGSSEWASGFP  
HDAWRDIYKPIYQAYKSSATTPTVDTEEIVYWRPTPKGITCTNDLTPAPNGINLLSDSIF  
VATMLKEAATLVTSSGGNAAISVDVPAGIVTSNVTMGVGGQSFVVSRRGETILNGTGGL

NIVDTCETYNYNVYVGSVTA

>10071\_t gene=10071\_g

MEQRRGSEFRTGDNDGVRYFQDRPNL GARITDDGRV AIHIDEHTP RLLLQRLGRPSGRE  
VEQTDGAERPLPKVKCSLKLNIQVIGSRGDIQPFVALGKELKAHGHRVRLATHMAFRE  
FVLDGGLEFFNIGGDP AELMAFMVKNPGLLPGIKSIRSGAIQRRRREMR EIFNGCWKSCF  
ETGDGTHLHQIKEDPWSKARDYRRRPFVADAIANPPSLAHIHCAQRLGIPLHIMFTMPW  
SPTQSFPHPLATLHTQNTKRTVANFVSYGIVDMMVWEGLGDILNTRKNTLALQPLDSL  
TAPSLHLRHLVPHPTYLWSPALLPKPPDWSKDIDVCGFSFLPSETSYKPPVEIDTFIKAGPRP  
IYVGFSGSIVVDDPVTLTKNIFKAVQKTGQALISKGWGGLGADEVDPDNILIIGNCPHD  
WLFQRQVSCVVHGGAGTTAAGLALGRPTIIPFFGDQQFWGDIVARAGAGPAPIPHKRLN  
VQNLSDAIEKALEASTLERAQAIAKNMQEESGVQHGVYSFYRHLDLQSLRCSIFPNRPA  
WHLKHTKINLSAYAATVLVKSARKISPDMLVLRPKEYDTRDPRGPLSASAQLLVGSIA  
GLMTGLVDTPKFELDLISAHAHVSHPREHLDHHAAYRAAIACPRPSPEDSVSEERQF  
ENDEEDDGV PNEESTQGDFADEDESETYVSSSTRSSA IERKRTLQEKAKPSSSMTSSKS  
QKLNVL YEAASHGNKMSKKFLRLVILLPTDVSLMARGFHNAPKLYHDTTVKDIPQVISI  
RSGFRAAGKELQDGFYLGITGLVTHPRHGFKDNGGMGLLKGLGKAVGGVFLKPTAGL  
WGLAGYPLSGMLREVNDL GKHQKCMVVMGRISQGLEEMEESTA QEGA EVFRRWSAI  
EEDMKRSNKRHIVRQNHHLHLQEPACVV

>9093\_t gene=9093\_g

MPLSYAKDVGGALEMMKAFSAKMGGRAPDFRRDPTAGLSVPENIEVKDFTATAPDGFE  
VPLRWISLKKVEDEKQKPGPVVYHVHGGGMILGSVALSTPSMIAQVSATAVPVLMVDY  
RLAPENPHPIPVNDVYAGLVWLQEHA AELSVDPARIGILGESSGGGLAAGAVLMARDKK  
LSPPIAKQILWQMLDDRNTVADEHIAPFVFNWYDDNKTGWGALLGDRAGIDDVDYYG  
SPARATDLSGLPDTYLEVGQLDVFLYDTIDYARNLSKGGVNIELHVYPGCCHAFDMVSR  
DGQKTKRALDNRYTYL KSI

>9098\_t gene=9098\_g

MYA QASLATVTWLALNLVAATADTQCEASTSKLLKVETTNGLIEGHLADDAPCVVEYL  
GIPYAKPPVGLRFTSPQPYEGHQIYEAKSFGYDCPHSTFPYIDYPGFFDDANRIIDYFAAS  
ANTTQSEDCLTLNIWSKATSRSNIAQKPVLVFFYGGNFTFGNTNTPFFYGVNFANAEDLV  
VVTVNYRTNIFGFPGADGLDTNLGMRDQRLAVEWVRDNIAAFGGDPSKIAISGQSAGGV  
SDVYWTYAYRDDPIISAATHSGNVYSFPLPDPSTQQKNWENVVDYVGCNATDTFRC  
MRNVTWEDIKAGAATVKS GSSSPLRTPVGFYPKADNTLVFTDYLERTNQKFAHVPI  
YGNNNNEAGFYAVTVYSSGVVPTQEQDDAFNLESFTCAVAKQVKSRRRY GIPAWAFCY  
MGDWNNTRLYPTSGAYHGSDMHMVFGNSAAVSGIPTSEPQKELTTLIQRAWFAFLDNP  
STGLSEFGWPMFDPNKKTLIRLGNDNKPEYELLYPFSYDAPCSNITLGLSLG

>9100\_t gene=9100\_g

MYPRLSVVFVAASSVLQITVATTVPVSCSVNQQLFTNPSFEESLAGWTITSNSANAAV  
LDAASSNSPFSTAADGQYYIDTYDSAPRGGAA LFMSQTLNGLDISTIYTITYSIAGQP HGS  
NSQNCNVYFFKDSQTNANLLVENIHVMGANGLPWTQYSLDFTPTASSHLIIFALECYSTD  
YYAGIDNIQFLAPATTVCSTSYSTVAASTPTPTSPSSSSSSSQAVATLSSSAVVSTAAAS  
TPTPSLASSAAVSSSAIPSSAAVTS AASSVASPSTTPTPSSSTIISSEPVPTTTSIPEPDDGED  
DGCPSE

>9125\_t gene=9125\_g

MSLKQEIETWVQALAHYDNNEFDES LRVDNIADTSKILFNCGVIHATLGEHEKAVECY

QRAIALDNYLAVAYFQQGVSNFLLGDFEELANFNNDTLLYLRGNTSIDYEQLGLKFRFLS  
CEVLFNRGLSYIYLQQIEPGLQDLQFASKEKVTPDHDVIDEAIREQAEGYTVFSIPVGVVY  
RPNEAKVKNLKTCDYLKARLVAASDRNNAFIGFQGSSELRKAMAIETAAKDDRPAETIS  
YAATNLVQKNLTSRSRQQSEPLGRNTFPPTPPPESDKGSSGSGTGGLTQRAASVRSGA  
GGRPPRELEDRPGGAGTNGRTGGNMPSMEKSRIGTSRTASEPRGPPSRQYSNSSRARDG  
RPRLYRETTGNRRGDGGFEFVPEEEYNDEVFDMYISPRNTNGFAPKTRQQQQQPRYI  
EEEPEYSSEYEDEFPEDEFEMVNEQPPPRKQRTRYSNPQSQSSGQRRAPSRRTMPEIR  
KFRVKVHALEDTRYIMIEANIGYGEFEGRIREKFGFRGLLRMRDDNDMITMGDQEDL  
DMLLSAARDEARRENQDMGKIEIWVEERI

>9129\_t gene=9129\_g

MRTGLCIGAGLAAIAHVHALAPRTQVADEYDFVVVGGGQAGLVLGARLSEIANYTVLV  
LEAGTNGDEYRERIDTPAYSYYESLWTPMNWAYYTVPQSNADNREVEWPRGKGLGG  
SSAINGLYLTRPGKDEINAWKDLLGDMDGADNWSWDSFYAAMKKSETFTPPSDAIAE  
GNITWDLSTRGTQGIHASYPGYTFPQVGEWIESLEAMGIAQSNEMYGGDVYGGEVSTS  
TINPTNWTRSYSRTGYLDPLADNGNYDVVADAFVMRILFDSSSPSNLTANGVQYTLDS  
GKTNCTVKVNKEVILAAGTIGSPAVLLHSGVGPKDVLSDAGVDLVSELPGVGQHLQDH  
LSATIKWNTSVVTSGSIFYQNLSEKNDTLYLSYIDSAIAYANSTLMYGDTLGSLQKNITTQ  
INSYKLNNTYDAGVIAGYKAIANMTATTILESSIGQIELLFMNSDSNGDIGITAALQHPYS  
HGRVYINSSNPLDYPVIDPNYMAFSADYEILRDGLKLARQLGNTEPLSSCLTVETSPGSSV  
TSDDEWLDWIRSAASSEFHPSSSCAMLSQNQGGVVDANLRVYGLANVRVADASVPIA  
LSTHLMASTYGVAEQAGNIIRAYYTNTTTTGTSDLGSTTSATGTALGAHASTGAVTTQT  
ALSGGIQTVSVSAWAVAFTAIAIAIFISF

>9141\_t gene=9141\_g

MASISTDGNCGSNSDTNSTCLGSTYGDCSTKGFSGSAYCGAGCQSAFGNCTSDNSQ  
TISTSGSCGSTGSNYTCLGSTFGDCCSSLGYCGGNSSYCGDGCQSGFGSCDSASSSIITTT  
AAATTTTSTTKTSTTASASPSTTTGTTSIDGNCGNNSDVLATCLGSQWGNCCSSHGFCGG  
NISYCSTGCQSNYGNCGLDAMTTNTTTTPGSPGLSKGAIAGISVGAVIGGLAIVGLLVW  
LAFFKTKKKKMOVSHQSEELKLFPPSKPLVSLQELNALGNAKHELDGQGNAKHEAEG  
KGFARQELDARVISELPAQHD

>9148\_t gene=9148\_g

MSQHDAIVVGAGMSGIYQAYRLLQMGLSVKVKLEKAGGPGGTWFWNRYPGAQSDTRS  
FLYRYSWDKEDLRTPWTENYLDAPDILAYLNHIVDRHNLRQHMLFNTEVVSMRWND  
QDHTWTLKTSSGDFARYVVTAVGFLSEPWPFPGLDNFKGSLYHTARWPEQYDLSD  
KKIAIIGNSTGIQLITKLAPMVGSLCLQRHPQYTPAGRRPVTQNERDRINETYDEIWA  
RARLTRNGGEFFATRKTSDVSPEERERIFQELWDKGGGAEFMLGSFSDLITDETANM  
ACDFLKRKIAQAVRDPEKRRKLTPKQLYARRPICDTGYEYQFNRENVDIVDILENPIAEV  
KSNGVLLTDGTFHQLDVLICATGFNAFDGAYRRLHIAGRGMTLNDRWKDGPVTNMG  
VAVSGFNLFMIFGPKSPLANVPPVVEAHVDFITSAIDRVQGQKELVGAAIESTKQGEED  
WGALCDIAKYLLFSKVDSYFNNGSNVEGKKRSTLIFYGGLAMFSQKLQECVDRGFPSFE  
LIHSH

>9155\_t gene=9155\_g

MTIRATKFTPEVLLSAPRRSAAVPNATGKLAVYTTQTTYSFESHSKTNEIRTIDLESGETSV  
VTNDAGASNPQWLDDGDLLVWLKGDNGNTSFVIGNARDPGRFYTAGTVPGPVSDLK  
VTKLDSGKTGFVVSGBKANPDGSLYNPKDAKKPLSSGRYYTSTWVRHWDEYIEPQKNSL

WYGVLQSSPSAASDKERRYASSGLTNLLAVSGLTDVEAPIPPFGGTDDFDISPNAVVFVA  
KDPAVNKATHTACVCYYCPMPSWTDLSTREAKIYQMKGLEGAMSSPVLSDGSAIVFL  
AQEKDGHEADKNRIIFVNPWWSGQLLEVFKSKDGKGAWPLSPGSVSWARDNKSLLITVE  
EKGRGILYQLPIEDILNATPKLKKLTSSGFVNNVAPLSADTELLLVSSSNLISSVYITVD  
PNAIEDAKVLLSSISRGGSSIGLSRSQVDEIWKGENDQPIHAFVVKPSNFPNDEKYPLAFL  
VHGGPESAWNDSWSTRWNPAVFAEQGYVVVTPNPTGSTGYGQDFDAIIGNWGGPLPYL  
DLERGFYDISKNLKYVDIDRAVALGASYGGYMMNWIQQPLGRKFKALVTHDGVFSM  
TSQLASEEQYFPLADLKGPLWKVPEEWQKWDPSRFTANWETPHLIIHNELDYRLTIAEG  
LAAFNVLQMKGIESAFLTFDENHWVLQPENSLVWHYAVINWINKHVGLPEISTTHHDG  
IFETDKNSRKVTNVPLR

>9159\_t gene=9159\_g

MHFSTVVS GASLLALATASSLSSRQD TSAETVVYWGQNSNENADLSAYCSSTAGIDV IIL  
AFLYEFNGIDIPSGVIGEECYISTTGEPQLCDDVASAIATCQAAGVKVLLSLGGATSSYS  
LQSQAEEAESIGQYLWESYGNNGNTTVPRPFGNVFVNGWDFDIEVNDGSSQYYQYMISAL  
RSNFASDPKNTYYITGAPQCPLPEPNMSIIIGNSTFDKLWVQWYNNNNGLDNIPYESC  
LGFNGNAPFNYLEWVDFLATTPSANAKLYIGAPASTLASNGNSAGAIYYITPEMATLVSE  
TEGNSTFGGVMLWSAGYSDSNVVGCTYAQEVHSILKKGTV

>9189\_t gene=9189\_g

MATTVSRFEHPGLHPAKVEKHGKSSIARSIRIAVYDPRDHEAPAILHEPRQYTVDNAK  
ASAVILISGAGGGVSGPAGIYPSLADKLAMLLSIPCIRLDYREPAQTKYCSADVIAAIDYL  
AGEFSSKHVFLVGWSFGGSPCFTVAAKDPNRVAGVATVASQTAQTDGVEMLSRPLLL  
LHGTGDTCLSSRCSQSLFEAYGQSGKKELKLFDDHGLSRNAMQVEKMIFQFVARTL  
GFNEMLGDPYIDIQAGQDLAGSRQERIREMREGHDFEGERL

>9212\_t gene=9212\_g

MPINMQLINALAVAMSISPAAAAIAIKGFNYGSTFNDNSVKVQSDFESEFKTAAGLVGAED  
FTSARLYTMIQGGTTNTPISAIPAAIATNTLLLGLWASGDTFDNEVAALKTAISQYGSEF  
ASLVVGVISVGSSEDLRNSPTGIAAKAGIGKNPEDIVNDIKTVRSTISGTGLADVPIGHVDT  
WTAWYNSSNAVIEAVDWLGLDAYPYFQNTQSN DITSGKSLFQDAINKVNSASGNKAL  
WVTEGWVPSGD TENLAVASTDNAKTYWDDVGCGLLFDKVNTYWYILQDAAKSTPSP  
SFGLVGSSELTTPLYNLTCPAVVSSSTSATSSATSTGSSTGSATGSATSSPTSVPASNATGT  
ASGSATGSATGSATGSATGVASGTATGSATGTATGFSTGAASTGTATHSGTPGASGTSTP  
TGTPGSATTPTGASGTHASGTSSSTSPAFTGAANTVSASVTGIVAAIFA AVVAF

>9231\_t gene=9231\_g

MRTRCQCPNIPGLSSSLRWGLLLLALWL VQVQAMKDYEIRDLRLQTEQMFYHGYDNY  
IKYAFPEDEL RPLTCGPLTRDRDHPEKIELNDVLGNYSLTLIDSLSTLAILASSNDTGSRA  
WSHFENG VQEIVRLYGDGSQGSEGQGERARGFDLDSKVQVFETVIRGLGGLLSAHLFAV  
GDLPIRGYKPSAEASEYAKAWDKSALSPSRYSK GIVWSNGFIYNGQLRLARDLADRL  
PAFYTP TGLPYPRVNLRYGVTFYENSPLSKDY PGQKTDDQRKYTRYQSRPEVTETCSA  
GAGSLVLEFTTSLRSLTG DGRYEDLAKRAFWAVWLRSEIDLIGAGIDAETGNWVAPFTG  
IGAGIDSF FEYAFKAYVLLSTGEPDFDTSSPWSVMDNYFLPLEEAHHSPEFYFQVWQDA  
QDAIKHHL YRHHGYQHPHYVQADLQTGATRAF WIDSLSAFYPGVLTLAGRIEEATEIHL  
LATALWTRFSALPERWNVATGEIDNGLGWWGRPEFIESTYYLHRATKDPWYLHVGE  
MVL RDIKRRCWTRCGWAGLQDVRTGELQDRMESFFLGETAKYMFLFDTDHPLNMD  
APFVFTTEGHPLIIPKSVPKPSFSTPKSNSEEVVAEVCEIAPVSPPFSSATAARPDIFHASSL

ARLHLLPGRNEAGGALFDFAHHDHPSVTVSDLFSPSNYTFYPWTLPELVYPYAMSSPMSI  
RPTLDISFPKLPGMIIGSGSMERVRDGVLLKSSIGMRLGMVQDMPLGVDHGSSAFYTDLF  
RIQVINNVPLGRDEKVYLSREIVFDVLSNDPHFSRVRDSIMLDIVIDVEPESTRVKNKNH  
TKSSRHQSYKQDAAIIRQESATISDAGTPLKGRISPASSVRTALSALMDHISTMLSDENSG  
GLDDDNESGYGGVQSSLFKKKTSSNVPTTRLILPAINSIGAGSAPLPDVVDAAFSHNGK  
PSTTRLTWSKIYLTDELCDHRLPANVPREYQVLVVKRGGCSFAEKLKNIPGYPNSSGSSNN  
NNRLQLVVVSYPEHDADSVSSLYQDVEGLQASAEQNFYEERYQRPFSTNPNQMQA  
RAALASESMLVRPHLDEIQMTSSGLPRREPISMTMVGGEETYEFLRNSTGLGIRRRYV  
KSQDVPIGNLYII

>9258\_t gene=9258\_g

MAFPFMRSFILLFLYRYVRLVVNLWSFYTFKPIPIPENPKLTAEDVTVIVPSLEGCGDELV  
ETIRTILDTKPELLLVITIEANRKDAEKMLKAMPAYLHDIRLFTITHPNKRRQMTRAIPE  
VRTSITIFADDDVSWPITALPWILAPFDTDERYGGVVTCQRLRRAVNATFSEKIWNFLGA  
LYLERRNFDCAATTHIDGGVPCLSGRTVAYRTKILQDEVFTNDFNEEWVFGKYQLNA  
DDDNFTRWMVSHGWETYIQYHPEVEVKTTLENNPKFLKQCARWSRSNWRNLTSMF  
ERHIWYRQPWSTYAVHLTTLSPALLGDCLLIYLCHKATETLDGDVHWWAMRALGIW  
MFISKFIKLLGHYRRYPADFLLLPVSILFGYFHGAIKIYAAVTLNVTAWGSREGADANDA  
ERMKRSDIEREKHARRLASIYPLNKVWPSSGYAPIA

>9270\_t gene=9270\_g

MRRAVLRAHPVARCLRQPLLTEHAASSALQFRRQLSSTRQLQEEPRPSFKGQLYESTQQ  
RLKRERAEQERFSQYQTQTPGSRYAALMFVLVFFTTGGYYLGLSLRPSTPSTSIPLSETQ  
PVKHNTTPANLQAAWADFVNILGKENVSTDDFDLESHSGSEFSTYSQKSNEKPFIVVYPE  
TTEEVSRIKVCYERVIPVTPYSGGTSLEGHYAPTRGGVCVDFRRMNKILSFHKEDLDV  
VVQPAVWGEDLNEEIAKEGLFFPPDPGPGAMIGGMVGTGCSGTNAYRYGTMREWVVS  
LTVVLADGTVIKTRQRPKSSAGYDLTKLFIGSEGLGLVTEATLKLTVKPKSESVAVAS  
FPSVQHAADCARRVVEEIQVAGLEILDDVQMOCINASKTTRREWTEAPTLFFRFSGTPS  
GVKEQIGIVQKLSKSTGGKTFEFARDDAEMKELWSARKAALWSVIAMKKDPSDHVWTT  
DVAVPISRLPDIVERTKKDLTQSGLLAGICGHVGDGNFHAILFSDKQKALAEVVRHMV  
VNAVEMEGTVTGEHGVGLIKRDYLPHELGETTVDMRKLKFDLPLCLLNCDKTVRVE  
PPAAGEIKPW

>9279\_t gene=9279\_g

MPSRQPSSSPRITKFTNCRILKSNHLIEQDLWIDSLTGKILKDQEFYELHLSPDQVIDLKG  
RILAPGFIDVQLNGAQGFQDYSVPQATKEEYDAKFIESNRGLIKGTVTSFLPTTVSTTAENY  
KQVLPSLAPTGKRNPEDGAESLGAHVEGPFINPSRNGIHKPEVLLASTQGFQDIINCYGLE  
NIPDIAKNTEDIADAEDAVTPTPATPIAKSLQKIRANGLVNGHRHHNVSTATSRPAIKMI  
TAAPEVGTMIQHLPDLVSRGIIYSIGHSDATYEQAMSAVGQGAMMITHLFNAMRPFYHR  
NPGVFGLLGQSDLPKPYFGVIADGIHLHPTSIIKIAYNHSEGLLVTAMRLCGLPDGVY  
DWTNGDRIKKGVRLTLEGSDKIAGSSATLIECVNNFRRWTNATTAELNAVTFTPAKM  
LGLEKVKGTLDHGADADLVVLGETLDSYSGPSLTVDQVWKFVGIKVFDSKEL

>9280\_t gene=9280\_g

MATTVLIPPSELDYDYVIVGGGTAGCVIASRLAEYLPNKRILLIEAGPSDYMDRVLNL  
KEWLSLLGGELDYDYPTTEQPMGNSHIRHSRAKVLGGCSSHNTLISFRPFYDLRLWQES  
GCTGWSFDMFTRVLDNLRNTVQPVHARHRNQLCKDWVQSCSTALNIPVIEDFNKEIRSK  
GQLEQGVGFFSVSYNPDDGRRSSASVAYIHPILRGEKRPNLTILTNAWVSRVNVEGDTV



TGVDVTLESgkkySIHPKIETVICAGAVDTPRLLLLSGLGPKDQLSSLGIPVVKDIPGVGE  
NLLDHPETIIHWELNQPVPPNQTMDSDAGIFLRREAPNAAGSDGTAADLMMHCYQIPFC  
LNTTRLGYDEPVDAFCMTPNIPRPRSRGRLYLTSDDPNVKPALDFRYFTDPEGYDAATIV  
AGFKAAREVAKQAPFKDWIKREVAPGPGIDTDEALSEYGRVAHTVYHPAGTTKMGNI  
ERDPLAVVDPQLRVRGLKKIRIADAGVFPHMPTINPMLTVLGIGERAAELIAEEAGWKR  
NQPRL

>9283\_t gene=9283\_g

MAPKDGALPPIWDDLDWQMGQLFMMGFDGTTIDGQIRSLIENYHVGSIIILTAKNLKSAE  
ETTKLILELQTIARDAGHPVPLMIALDQENGGVNSLYDEIFIRQFPSAMGIAATGSKRLAH  
EVASATAQELRAVGVNWILGPVLDVLTNRSQPIGVRTSGDDPQEVSYQVETMKGYYQ  
EAGLVTCGKHFPYGNIEFVGSQTDVPVITESLEQLSLSALVPFRNAIANGLDAVMVGGV  
AMSSAGVNMHACLSEQVVDGLLRKDLKFDGVVVSECLEMEALTHNIGVGGGTVMA  
MKAGCDLILLCRSYPFQLEALNGLKLGVENGMISRSRIRQSLQRVLAMKARCTTWEQAL  
NPGGINSLTKMQPSHTSLSTRAYDSSITLVRDNDLLPLPQILEPDEELLLLTPLVKPLPAS  
AVSRSMMLDMMTTSPDPSASSEKSSITSGESVFREFGRSLARQRSGRVLHTSYTSTGVRPI  
HESLIDRASAVVILTADSNRNLYQHGFTHVSMICKSQYSQTGERREKPVIVVAVSSPYD  
FAIDPSISTYICTYDFTETALQALVKVLYGELSPTGSLPGTISRQKIHQSRQHWLVETWN  
EERDSEALDALLDSVRESGSHAELTHVSSHFLLRNDDIDEAHFVVRNSTTQALYGFCST  
YFFRSTGTGVIGSIIVDPTRRKL SIGHSLHNRAIRSLLRKGVKRFQLGSRLPSIYLGIPAAN  
LVERKRLRQWFAQLGWNTALSRPVCVLLRPLSSWTAPEGLAKSLHTNDVDYDLVHG  
WEYAESIFDHIKTNSRQGVMEIYKMALNGAPHSQVIRAKRPEDGAILGSVVIYNSQSAIA  
EYIPALHKKDKKEKEKVNNGSNSSANGSSNGVTAGGGGVSSPVISPSVGEYATLMQGLILLG  
IKQVRKSGADAVMLDCVDGDGNFDSL TAMGFTVLHTFEEVTCDATTWKL MQPS

>9303\_t gene=9303\_g

MSQLENGHTNGFGDSTFSTETVPSATRFSDIPSAIDIPASTFDSEVEVSLEELPDDPTELCT  
LLENEKAAKNFWVIIISLAYAKQNQLDHAIEILQKGLASVAHGATKEKLGLLNWLCWLL  
MIKSRQAPRVAPDGDNSDVKTKDYLLQOATSTLNEASRLNPAYTPLFLARGVLSLLRAS  
LYPPRPVRTGIPDTSERVESLRQALKCFEEASKASGGRNVMAHLSLARAQYSLGNADA  
LVVYQTVL TRMPGLTDPDPRIGICCLWQLGFKERAKDAWERALS LNPKSKVASILVGT  
YYLYSSSQRPSTDPQFGELYRTSMHTTQSSLKLDKDYPMACARFAGYKLIRKDYKAVEV  
LARKAIEQTDVVSIASEGWYLLGRKAHYEGDTAKASEYFNRSQARGGGDGGFLPAKF  
GVVQMQVKS KDLGAKFRLEKIIQTKNPECMALLGALLAEDVFSQAQASGSKDDKTAD  
TTKAISLLENVRS LWKDPK NIPADESVLIYLSRL YESTSPDKSMQCLTQLEEI QMDQIPD  
QDKPDGTLQNGELKTALREYLPPQLLNNIGCFLYQSGKVAQARELFQAALTACDKSVEL  
EGEKATDALFTTVRYNFARSLEALDLPDEAKKVYESLLQRHSDYTEASARMYIALRQS  
PTDEGPKEMAKL YESDSTNLEVRALFGWYLSKSKKRVANLAEDHEQRHYKHTLQHFDK  
HDRYAL TGMGNVHLLTARDMRRET DADKEKRRKMYERAVEFFDKALQLDPKNAYAA  
QGIAIALVDDRKDFTGAVQIFSKIRDTIKDASVYLN LGHAY AELKQFSRSIECYEMALSK  
DRARDAQILACLGRVWWLRGKHEKNLTAMKTALDYANRALEVAPEQAHLEFNVAFVQ  
NQIALLVNSLPEAQRTVQDLQEAEEGLEKAIETFTRIAQVKAPPYPRESLEQRANMGRNT  
ISKQLERSIQNQKEYEKNALKLQQARAARDAELKRREEEVQKARELELEKKRQLAEQR  
QRIIEETQRLAAKRAEEQRAREAVEFSTDSETGERQKRKKKAPSGGRRRKRREDDG VV  
SDGRSISVVRSDDDGTPAPKRRRRLERRGGAKEKPGKYKSELVVDSDDELDEDAAPP  
AAADEDLFGDNDNEAAEEEA TPAAGGRGGRSRRGKRVLDDSDDEDDEPAAVSREVEDEE

MQDADDE

>9333\_t gene=9333\_g

MSNFRHLVASSRRADTNGKSLPINLQGIWNNPTSPWGYNVTAPSLSPENTFIVPDDLT  
DAGSNVAINIASAMDGQFILEVFNNLIEAGEILGLADDVVSA AEGFLPTIKPQQIGSLGQT  
LECRIEYQESAIEQRHLCPLWALMPGRQFSPLLNSTLGTAAEVLLDRRVSHGSGSMGWS  
RTQLINQYARVFRGDDAWNQLTEWFAVYVPDPLQSLQYQRELSGTVSLS

>9348\_t gene=9348\_g

MSRNVTSSELLDLELPTGVKLSPDGQLVVYSAKSNWTQGDAISSIWIGKINSPKSAYKLID  
GTYNDEPRWAPDGQSI AFLSDRGARGKSCAIYTHYLNSSQEPKALTAATNTQTIKFEF  
SPDGNFIAFLVPSEEEQNTFVDVWENWNHHTLKLDDVRSQDIKLISANWLHVDFSW  
EDGNQIAYATHRSPDIESEWLHGTSIWTTNIVDTDVSREVCHIPREVF DLNWLNSLYF  
RSYSTLTNDNSSLIIYIDLQDKDGR LIKAAHGDDCAAGLRRVGNKLLVYVQKGMED  
QLRLDSDILYKTKCILAFDAIMDTAGNIWVAFVQGSVNR PQEVFEIIPAGEVIQLSHHG  
SAWTFEFCRTRFIKCPTLDGSEKIEGMFISPIAKAGQKVATIVLIHG GPYFRVTD SFDFLNH  
FFMPRLLEFGGILLPNYRGSSGRGDRFARYTTAGLGIYDAPDIAMTQHAINLGLADPSR  
LLVAGKSQGGYLSYLLSVRNGVNDFGWHFQA AIAAAGVTDWDAMAISSDIGYIEAGMA  
GEAPWRLRKSDVKNRSASALWEFRDAADKQRIPPILLIHGKDDIRVPVSQAIGFRRAL EE  
AGLEFQCAIYRGEHFFQKRASAEDLMERIVRFTKKYL

>9355\_t gene=9355\_g

MRWSAVVCSFVLSVPAKAVAASSASSSSTCRCPGDRCWPSAATWANFNQSV DGLIA  
TVPLGTPCHAPSYNATECNVLRNGWLLPEEHYESSSIMAPWFTNETCDPFHPVSQPCT  
GNYVVYSVNVYKPEHVSKTLFAKQNNIRVVVRNTGHDYNGKSTGAGAIWIWTHNLKT  
REVIDYNSTYYQKAVKLGAGVQGIEAYELADAHGLQVVGECPTVGIAGGYSQGGGH  
SALSSRYGLGADQVVEVIDGTGEFRVANREQNSDLYWALSGGGGSTYGVVWSMTS  
KAHASTPVSGLNLTFTNEGISQDTYYKAVSIYHANLASIVDAGAMSVWYFTNTSFAISPIT  
GPNIP LAKLISLVKPFDTALTELGIKYTTYSQQFD TYLDEYNGMQGAIEVGIAQYGGWLIP  
RSVVETNNDNLTDVYRYITEDGAQFIGVGVNVSKAVVGNDIYNAVLP AWRDLIDTVIT  
TPWNFTAPKSAMVAEQLKMTNDYIPRLKALAPNSGAYMNEADFRQPDFQKAFFGANY  
QKLQSVKAKYDPNDLFYAITAVNSDQWTELEDGRLCRT

>9359\_t gene=9359\_g

MQLFSLIVAAALQVCVGARILGQRDASTDNSSFNVLDYVDPLIGTANGGHV FAGASLPF  
GMAKAVADSSVDNQQGFASDSISGFSMHDSGTGGASLGNPFI PNPNGCPDDDLNQ  
CVYRYQDRSVGFSNATLIAQAGYFSIDLDSGIKGEITVTNHTALYRFTFPSDTT TAPMIFA  
DLIDL PQRSNGTASVNDKTGRITGSGTFNPSFGIGSYDLHFCADFSGADIFDTGVFVNDR  
AGNEPKTVQTLSDGVNDDSYSAGAFTRFKAGTTSVIARVGVSFISVDQACSNGEKEISG  
FDFDGTKQAAQNIWKEKLGVISVDATGVSTDLQTVFWSGAYRALLSPQDYTGENPLWD  
STEPYYDSYYCIWDSYRAIHQLITLVDPLSQSRMIRSLIDTYRHEGYLPDCRMSLCKGYT  
QGGSNADILIAEAYLKNITDIDWATAYEAVIQDAEVEPLN WAVEGRGGLTSWKNLGYIP  
TDDFDPYGQGPLTRISRTVEYAYDDYCIASLAKALGKTDDY EKYIKRATNWHNMFDA  
NTTSLGYTGFLQVKYSNGTWGYQDPQFCTPLMNFTSCYLNPDGHETYEGSTWLYTFYV  
PQDMASLISALGGRDTFIDRLTYFHNSGLLYVGDEQAFLTVYLFHYGGRPALSTKQIHAY  
IPSQFN TISISGIPGNDDSGAMGSFSTLSMIGLWPVHGQDVY LINPPFFKEVNITHGITGNVA  
TIRNVNFDASYANIYIQNVTRDGEVWTKNWIQHDFFEKGGVLEIT TGASESDWGTRADD  
LPPSMDSYSF

>9384\_t gene=9384\_g

MEVNRHFSWRSLVTTTALCFFHIAAGETTLGQTPQMGWNSWNTFKAIINESVIHETVQL  
FGTLGLQKAGYNYIVIDDGWANYSRADGYLQANATGFPSGIKALADQVHAQGLKLG  
YSDSGLLTCAFRPGSLGYEERDAQTFASWGVDYLYKHNCGGFEGMTAAPQVRFAMK  
NALEVFGQDIFYSVCEWGFQFPWHWGAIGHYSYRIAGDITTSFTNETGCACKSAYCLNT  
GYAGCSVLTIINKMREISQYGVQAHWLDMDMLEIGVANMTLYQQQTHFAFWAALKSPL  
IIGADLTKISNESLAVLTNKEIALNQDPLGESVKYLENFSADGLWQVWAGKIQGGYVVL  
LLNEKSYPQTISLQFSDLDLGTTPRKIVELWSEETLKTAAFNGTVQPYQTLVFKIDAA

>9395\_t gene=9395\_g

MSDSSRPNFLIRGATVLTVDPASGTRENCILIKDDRIVAIGQSLPEPTEGGGTVIDAQQ  
CIVTPGFVDGHHHMWQQFLRGVATDWSLCDYTVNMRSLYGSLYTAEDVYLSTYVAAL  
SLINNGVTSVLEHCHIMNSPDHADA AVRALQDAGIRGTF CYGFFPNPIANSGEPTSESV  
PFTHV MRIADAARIKEKYFGSNPDKQRVTFGVAPDEPEAQSVEETIRIQQARNLGARI  
TMHVAMGPFDRARRRVVQIADAGFLGSDIVFSHGASL TESEFTA IKTSGAGIVGTPDTE  
LQMGMGFPIVFPAAADKGCRACLGIDITSNQGNDFLAQMRLALQVRR AQENETDFPLKIA  
RKTS DILRMGTLGGAEMRLENLVGSIAVGKKADLVIFHCDDIENSPVADPVGAVVFHS  
SVKHIDTVIIDGHIRKRHGNLDAEWKCLRDEVVRRSERIKEAASNIDMTATRAKWIRVFE  
TGSPD

>9396\_t gene=9396\_g

MRSALVLSFLLPLALGCNNPANHPCA AVYTASRSSASEFCATFTASTVTATTGLPTWAS  
ACGNEVKQLSSACNCLDSTWTTTTGLVAASTSVAATTTTPVVVYTSTPVAETTS LAVAVV  
SSIKAATSTTSVRATTLATSTKTTATLTS AVNTAGACVVTDYAGISSAVK SCTNIVLSNIS  
APPSSTIDLQSLQTGATVTFAGTTSFGTTLDSDFDPIVISGTDYITGAEGHVIDGNGANY  
WDGEGSNGGQAKPDHFIVVKKSYNAQITNLNIQNWPTHCFYINGVQGLTVSGLTLDNSA  
GNEPNSLSGSDPAAHNTDGFDISSDVT LQNIKVYNQDDCVAVTSGSNIIVSDLYCSGG  
HGLSIGSIGGKSNNTVAGVTFENSQV VDSQNGCRIKSNSGTTGSISNVIIYQNITLSSISKY  
IDVQQDYLNNGGPTGDPTNGVTIAGVS FIDVTGTSTDDGKNYIILCGDGSCSDFTFSGVSIT  
GGGSSII SDRFQVNIPGIFTGTLKSSSPYAPSGLILSSPALRKL VASCAGRMEMDLDSL  
KFGLPWQYSRPQNPHVISHKSNRNAELPSRSTMERYARAWFSSIHFLVFPVISLDFERTL  
DLVYGSQDVKEYTGSVSAKAALYAFLSINTIVGCTKEDSSHGPSSEFYA AKAQSYLVDIV  
QESTMDGLQAL TSLILATSFGDYKKAAMFVAMASRIAYALDGHRNPFESRSSAYDISLP  
ECHIRNLFWLCYTFDKELALRTGQPPSISDDNCDLTLPPGYVELQDSNICCPDVVIDNTTV  
PLYPLDPRLSVIKSRTYKLLYSESALRKS KSEILQHIRELDDTLEQWRLSLSREFRPTLTF  
EDMLFPSALATQPVMLRLAYHHCVIIIHGASNR CRDPSGDLDIQEIGVTSSLGLSVEASRS  
SLLYLQAALPNVAGECFWLILFYVSSIVTILGHMISNPNDPKSISDFELLQVSDMVQSF  
PITELSA AELIQMQLVKDFSRELVSITGMAPIDRTHTV

>9411\_t gene=9411\_g

MADALKSEGNKAFSAKDYATAIDKFTQAIAIEPQNHVLYSNRS AVYAATSEYQKALDD  
ANKATEIKPDWAKGWSRKGAAARGLGDLLLAHDAYEEATKLEPNNDQFKASFNSVKR  
AIDAEAQADGFQGD TGGLGGMFSDPNLIQKLANNPKTASLLADHEFMTKLQKLENPN  
SIGAELGDPRFLQVMSVLLGIDMQFGAPPEAAGGPSRATEAEEDVPMPDVRPTPAEPKK  
APEPEPEPEDEESLAKKKAQEAGDAEKKIGNDYYKKKQFAEAIHYQKAWELNKDVTY  
LNNIGAAKFESGDYQGAIEVCQEA VQEGREL RADFKIIAKSFARIGSAYEKLGD LAQAE  
YYNRSLTEHRTADVLTKLRAAEKAKIKA EKDAYISPEEA EKARELGQKQFQEA DWPA

VDAFTEMTKRAPEDPRGFSNRAAALIKLMAFPQAVTDCDEAIKRDPGFIRAYIRKAQAL  
QAMKEYNKALDSLTEASAHDTAGKNAREIEQQNKILESQYSARAGETEEQTAERIQKD  
PEIMSILQDPVMSILQQAKSDPALQEHMKNAQVRSQIQKLVAAGVIRLGR

>9460\_t gene=9460\_g

MATIKAEIERGLQLSNPAAALQLSQQASALLKKPFSSSILPFATSENPEQWIEYEQLFLVC  
LRTGDDKAAHLCLDRLTERFGPANERIMGLRGLYQEATAKDASALEAILKEYQKILSGN  
AVNVPILKRRIALLRSMNKYDEAVSALVDYLEAFPTDAEAWCELADLYQSNALSAQAIF  
SLEEALLVTPNSWNLHARLGEVLYISTTSADRGISTTQTLRSVKHFLRSLELCDDYVRG  
LYGLIIVRYPTATELIKHIQSRPEQSTDLEVPVTTLEDLKTMAIQKAEKLIQSQQSTTHQP  
DGLQSLREL VQK

>9464\_t gene=9464\_g

MAFPVVTVAGNGFLKSSVRFQIKGVAYIGDSSGSSVIDTLADPNANQCAIDAPLIKELGA  
NTISVHYIDPNQGHGKCMQSFQDNEIYVIANMATQRDYSVDMSGLDPSSNLGNSTWQ  
TSVFNQYAAVLDSMASYENLLGLIVGNEVVDQSTQVDLAPFLKAAVRDMKAYAVARQ  
YRTIPIGYFTSDDDNWAQQMAEYLVCGGNKSEAIDFLGFNDYSWCGELSINTTDYEQLT  
SDLGDIGVPLFFSEEDGCTAVQPRTFEDQAAIFGSNMSDVWSGAIIYEWKQSGSESEYGI  
VSYTTSAPSTPTLLSDYSALSSQWASVTTADNAPSTIPTPSCPASTGSFWPVPNAALPTI  
AGLNFANIKPASASSTATTTSAGTSTSTNTGSPNLATSNPGLSTGAKAGIGVGVACGVILV  
LSVLFVWSYGRRRQNSKLESAPSAPVSAGVPPELPATKTWRHPPSELPAGEEGKAQELDS  
VAIHEFGNEADKPKEEEVKRSSSRNKTVYK

>9468\_t gene=9468\_g

MPPLSDFNGAIAGRNVIVGSHFETGATMNNYFGGHPIMDDGSSRKRVPFSTVPFAPDRDF  
VDRPEILEWIHDKCVGPGARAALVGLGGVQKSQLAIRYSHDVRDASPQTFVFWVHAST  
RARFEEAYRDIADRLKLPGRNDPKVDVLQVLRNWLCDENQWMMIVDNADDIEVFY  
LKQTRTMDESSPAPTPLATYLPQSRNGSILITRSKDAARLAGGYRNIKEVCAMDEIQ  
ALDLFRNKLECASDEEGAILLRALDYIPLAITQAAAFINRRGRMTASGYLDEFQRNDKK  
RESLLNWDSDGLRRDESASNSVVLTWQMSFEHIHEQRHSAADLLSLMSFFNPQGIPEWIL  
RKHSKSVAKAGDEDESDNAFDEDLDTLQSYSLITATADRDVYEMHALVQFCTRVWISSF  
SDAEKWKQKFLGLMAREFPKADFKNWAQCQLLPHVVWLYESEVSSDKAVEEWALV  
LNNAAWYMRTGLGNYDEAEKLNRRALEGCEKELGEKHLTYLTSVNNLALVLQYQGKY  
DEAEKQNRRALEVREKELGEQHPATLTSVNNLA AVLQYQGKYNEAEKLNRRALEVREK  
ELGEQHPATLTSVNNLAVVLQYQGKYDEAEKLNRRALEGCEKELGEKHLTYLTSVNNL  
ALVLQYQGKYDEAEKLNRRALEGSEKELGVQHPDTRLIVSNLASVLQYQGNYDEAEKLN  
RRALEGCEKELGEKHLTYLTSVNNLALVLQYQGKYDEAEKQNRRALEVREKELGEQH  
PATLTSVNNLAAVLQYQGKYNEAEKLNRRALEVREKELGEQHPATLTSVNNLAVVLQY  
QGKYDEAEKLNRRALEGSEKELGVQHPDTRLIVSNLALVLQYQGKYSEAEKLNWRAL  
GCEKELGEQHLTYLTSVNNLAVVLQYQGKYNEAEKLNRRALEGREKELGEQHLDLTSI  
YRLAYLLHKQKRYTQASELYQRACDGYKQKLSSQHPTAIKCFNDFTAMQQEAGEEGLR  
RNRIFKNNPKAALGETPTCGVTSLSHKATTEPASSQKSKQGSFYTRLRARMRRKRL

>9473\_t gene=9473\_g

MTALQQSAPRSLSLWGWLCLLAKVGRIVAGLIFKAVRYPLLSEKSKTKRSFHHYIAYEG  
MIDFQSGLSAVEKHAVLPSTSWQCANFAHGNNVPYERLTLQDGTAFLLNGSASSTRHA  
LGLNPFTRGSKKAAALTEEMILAKQKANKAIVYFHGGGYVAPILPQHLHLIYSFEDKPRY  
KDGVVVYVLAISLVDEHANHYPTQLRQAISLLDHIINTENITPSNITLMGNSAGANL

VLLHLSHPNPAVPPLHMKDDEHFTAAVAISPCWCMMDTSAESMTTNADRDVLAASALDY  
WGGNFLGGRPLDPWNSPLQAPAEWWTDLKV GELLMYGEDEIMKDDTEVLCKRIQSAH  
PQTTVYGLQRESHEQMAMNKLLHLPWISDSEKIYTAWMKERFY

>9486\_t gene=9486\_g

MDTLLGCFSASFSTQKQKDWKQIEEKANDIENQTSWTSPHENTCMLEAFEWYTPPDGRH  
YQRLHSALS DLKEIGIDNLLLPPGCKAMQPTGNGYDIYDLYDLGEFDQKGSVATKWGSK  
QDLIALAQAAEELGMGMYWDAVLN HKAGADRKEKCLAVTVDPKDRNIDLTKPQEIEA  
WVGDFDFASRGDAYSKLKYGWQHFN GTDYNDLDSTKTAIYKIFAPGKWARDVCTSEN  
GNYDFLMFANLDHSNPEVRS DIMRWA EWIGGQLPLKGMRLDAVKHYSAEFQKNLVDH  
VRQSGKEWFFVSEYWSGNVLEIQDY LKTM DYK VHAFDAPLCQRFSAVSQTREADLRLV  
FEKTLVKFEPEHAVTFVMNHDTQPHQALEAPISPAFKPLAYALILLRKDGYP CIFYGDLY  
GICSHTANETGTPKKKKFRHPHPKELQRSLPAMILARKLYAYGEQQEYLP SRNCIGFVR  
YGNARHPWGMACVMNGLTPVKLRM FVGKRHAGERWSDVLD FDFQALDESSDLKGKS  
ARTKRGGKMKTKRIVRISAKGYAEFPVASMGVGVVWNEGA EGRERFGFCL

>9489\_t gene=9489\_g

MTQGNTALETNGCIGYVSGNDTLGIPSICMGDGP EGVGNLNNVTTFPAPVLITATWDE  
DLNKKFGEALAQEHR SKGRNVIFAPTINIVRSPLWG RAAESMS EDPFLTSRMTVA VVQGI  
QSQQMVACPKHFAAYNQETNRFLAPEFDAIDAIV DERTLHEVYLP AFKAAVQEGNAG  
SVMCSYNKLNHIHSCENPWL YERLKDDWGFSGFV VTDY YFAQR TTVSAALAGL DNSQP  
GGSWVDYYGLP DFFGELLVEAVDNGSVPFSRIEDMVARLWRP MFENGVIDRPVLGDEN  
SVARTPAHLNLAQKLVEEGAVLLKNDNKTLP LPTGNKYKSVAVFGADATNQSQVTELHG  
GFVLDTTMVVQSSVEYIKNRGQQENISTPYSEV YPGTGIFPTVPSEMFGTAGLNVSYWTT  
RDFS GTINRTLQVANITGSTYPSDLGAVWPEVFSARYEGTFYPNTTGLYHFSIYNGGAT  
LYLNNDVVANLNGSNFGMVVQGIVNLSADTPVSIRLDYSMATSVDPGIYGVSLGVNVA  
DTNRY SRAIELAEAADVSIVFVNDEHTEGLDSNFLFELPGDQNALISLIAAHSKKT VVVL  
NTNSAILMPWLDEVD AVIEAFYPGQQVGSAMAALLYGDVNFSGKLPVTFPRQYADVPT  
ALKERFPGVDLKATYSEGLLVGYRWFDEHEIEPLFPFGHGLSYTDFEFSDLKLNLT HAKK  
ANFSLNATFKVQNVGEVVGKEVAQLYVTFPERANEPKVLKGFQK TDSLEPNAE LELNF  
SLAEEDLKVWDEKSKDWR FIPGLYTVSIGKSSRD LPLTETILLA

>9501\_t gene=9501\_g

MAGGILSFLGLFLLAHCASASTQRSNHKQNTENQKRDSLPTNYTTPDY YPTPNGGWDS  
NWSAAYAKAQKVVS NMTLAEKVNITSGTG YLMGPCV GQTGSALRF GIPRICLQDGPLGI  
RNTDNNSAFPAGVTAGATWDKDLMYARGVAIGEEARGKGINVQMGPVVGPIGRKPRS  
GRIWEGFGADPSLQGLAAAQTIQGMQSTGV IATLKHFILNEQEMYRMTSVLQVGYSSDI  
DDRTLHEIYLWPF AEGVRAGVGSIMAAYNHVNGSLCTQNSQILNGLLKDELGFQGFVVS  
DWY AQFGGVSSALAGLDMAMPGDGAVPLLGDSFWNYELSTAILNGTVPLERLNDMVT  
RIVATWFQLGQDDDYEPNFSTNTEDATGPLYPGALFSPSGVVNQFVNVQGNHSIAREV  
ARDAITLLKNVNQTLPLSTNASLSVFGTDAGANS GGLNSCSDMGCDNGILTMGWGSGT  
ARLPYVITPQQAILNKSGNAQFHISDSFPSVTPAADDIAIVFINADSGENYITVESNPGDRT  
TAGLNAWHGGDDL VVDAAAKYSTVIVVIHTVGPILMEEWIDLPSVKAVLV AHLPGQEA  
GDSLTDVLF GDYSPSGHLPYTIPHNESEYPASVGLIDQLFGQIQDQF TERIYIDYRHFLQA  
NITPRFPFGYGLSYTTFNFS DATLTTGTSLTEYPPARPAKSPTPTYATTIPPASEVAWPTGF  
NSIWRYLYPYLDN PAAATSTAPYPYPTGYTTTTQPAPRAGGAQGGNPALWDTVFTVDL  
KVTNTGTRSGRAVAQLYVELPEDTLGVDLPPRQLRQFEKTSILAPGDSETLSLPVTRKDL

SVWDVVVQDWKAPVNGEGVKFWIGESVSLEDMQIVCTVGQGCESA

>9504\_t gene=9504\_g

MELVVNHSSDQLESFKNAQSGGNKKEWYVWREKNPEGKEPNNWGSIFGGSCWEWKE  
KLQQYYLHVFDVVSQTDLNWENSEVREAVCDAMRVSLDKGFDGFRMDVINCISKTPGFP  
DAPVTYPKSAFQYGLIHRFNGPKSQSICMKCIIRFSSSTILVHSLSEKPYE

>9507\_t gene=9507\_g

MPSGLSLLHRAEFVPGDPPGDGASPIVDIVA VHGLNEDMIEAWTHSGTGILWLRDLLPET  
IPVARVLTFGYDSSPSSFCGPGCADTIQKHAQTFVASLQADRSIEGCDYRPIIFICHGLGGV  
LVKKALAYSSSSTSSVQHLTYTIFVSTYAILFFGTPHDRVNSGSWLALDTAPGLESVAK  
SRSSNESRRAFLEDDSTTLQAITEQFAPLMKKFRVYFFWEELPTKCGDRTRFLVEEESAA  
PTMDNTERCGIDATHSDMVKFSRSDSSSYRTVIAALGRYCNDAPVVITRRWKKELETLA  
RIRSIDASELAGPEFEVHLDRLFSQGRPNVGVPRNKHFYPPQETSLGFVGRQEVLTMLQK  
TLFSIGSDSLARKQRRFVIHGMGGCGKTELCSKFAEDNKERYWAIFTIHAKTITAKESFA  
TIGKLGLEATESAGKYWLSQLTEPWLLIIDNADNPDLDIKSFPRCDRGHVLTTRNPD  
FRIHGNAGSIELKGLKEGEAIHLLLDCAKIPRPWDATTEYCSLEISKALGYLALALVQAGT  
AVFRKICDLKDYLNFNHNLWYSKRQARSRSTTEVEEKGDDEDVLYSAFDFSFAYLQAKNTT  
MSQDAVDLLNIVGFYHFEHIRVDIFTRAIENRRKSVSISAAKSTRTRLLNAFITRFHPPTLL  
PHFLKGDPELLHPYRVREALHELIALSLINYDGKNASFLHPLVHLWARDRLGYREKTV  
WAQIALNTLTESVMLPPEDIGDTHAEYRRDLLPHLDECLAACPV EIGYFDSKLGRIQLAS  
AKFIQQTAFIVRDQAMNAAKCGYIYAERGRFSEAAFYLSMVKDTLVQTMGYEHEKTM  
ITMLGLAAVCWGLGRLEEAIALQKR VVKARSKVLGPEHHDTLIAMDQLGRSFWLYGQY  
QEALQLQEVTTTRMKATLGDEHPDTLAALDNLGVTLGSHRFQESKDIHEQILRIREKK  
FGRTDPETLTTLNMLAMALLDLCQLSEAKVMMQEVVEQRQWKLKKEHPWTLWAICNL  
AKVNIELGYLDEAEQMLIDGIAAGKRSLDEHLGVLGCGQLARVYARQGRLEEAEKL  
TLDVISRVEKSRGEEHPDCVYGTFLAQLYELQGNIEAIDTCETALRRASTRLTNQHPL  
YKKIDAYSHTLRRSFSPKLNQSELDSDRKTLPPHYSKNTQRTQTW

>9513\_t gene=9513\_g

MDNVQSMYPTTAAEYREWVKQLSYLSPRETLFTGNCKRLAKVLHDAEASGTDQEGN  
GFARQFLLSSRTDENGQMVNGDTSLDRGNRIIYLSGYPSAHTLTEIGAKYQISPEFFDKHL  
SFVTEGSTNCKIHPSHYILPSEQQLVLQISIPSIGGVHGVWLHEDMHKTHQIHAEMNIYM  
HGLRMGKGWPRFHSIVRSSEIHDSSRFSIEQVVTIHIARNQPIAIWSDAGADLSYSPAVPW  
LDPTKNPHFRPVILQGRGPEVISAKETVFPSPGISGGLPQSLSLLRSAYGASLDPVEMCQN  
PIYALDELFRFYSASETQYLDMIASVLETNTVEDYRTNPEGLSNTRTILLHSHRMLQRRQS  
HIAEMLNFLRFP AIADLKDASPRAKSAIRSLCMDLEYLQQSNRELMSSRCRHELDIITNEA  
MFKDARRGIVLSRNSQKFAAFYVPFSTCSVFGMNFVQVDSIGKGLLARDLSRHVF  
ALDLRNHGDSPPHPIHNYMQMAHDVEAFIKTHGLKNVSLIGHSMGAKTALTL SLHAPD  
LISNVVAVDNCPIQLPIPADFQKYIDALAEVVKARIRTHSEGEQILAQYEESGAVRLWLLS  
NFVKDRQHAPYLKRLPLDTLRHALDALGDFPYPTQTSSESGSESKAVKFPKPALFLRSYQ  
SHYIPDDALPLTRSFPPQSRVVD FDCGHWIVQDRPEEFRRVVVDFLRDGR

>9516\_t gene=9516\_g

MLLGGILLAAGFPLLTSAQHVIDLSGDNWTVKNAQGNVSAPASLPSQVHLDLFAAGAIP  
DPYAGTNEIDLRWIAWSNWTYTSHPVKGLLGNASSSWLVFNGLDTFATIELCNKVVGT  
ANNQFRQWQFDISDALKSCKGDPVISINFGSAPEIANAIATETGQETWPVGVQGLFEFDN  
RWFIRKEQSDCGWDWGP AFSPGTPWQPAYLVQFKPDDGVYVNLNTDIDIHREGQLNWL P

PDQSKPWVNASIDYLGTLPGASLTVEIKDSQNRTTIASGSLKNVTTAGNSISGVTTVG  
ANVPKLWWPTNMGDQNLYYITVNVVDSNKKTLASVTKRTGFRITVLNQTNITDAQIAL  
GIAPGANWHFEINGHEFYAKGSNFIPDAFWPRVTEDRMKRLFDSIVKGNQNMLRVWA  
SGAYLPDFIYDIADEMGVLLWSEFEFS DAL YPVDQAFLDNVAAEVNYNVRRVNHHP SL  
ALWAGGNELESLELLLVEIDPIEYPRYAGEYEKLFISLILPLVYDNSHSISYTPSTGNGY  
TKINFSLPVMVERYENV TAGEYYGDSDYNNYSLEAFDMSQYPVDRFANEFGFHSMPS  
LQTWQQAVTDENLQFNSSVILHRNHYPGGLSTDTIRSAEGMGEMTIAVELYYPIPSKS  
DPIANFAAWCLATQRFQADMYKSEIQFYRRGSGRPERQLGSLYWQLEDIWQAPTWAGI  
EYDGRWKVLHYVAKNIYEPVIVAPYWNL LTGQLNVTVVSDLWESVSGSVNL TWYDLS  
GKPLEKNAGIPSSVAFEVGPLNITDILTNIIDLSIPNINNAVLVLSL SATGRLPNSNTTTHF  
SHENFFTPVFTNEAKLVDPGLKLSYDNSTDKFTVEATKGVSLYTWLDYPAGIVGHFEN  
SFVLVPGQPKEIVFTVQGS LTEDVVKNVTVQSIWDQAERT

>9522\_t gene=9522\_g

MLLSKSLTVLALTTFPAVNGWPWKRHSKNRFNVDLVDHLIAFGDSYTFVQGTNGYPTF  
SFIGDYLPGQFDVTPSELWSDRIVQNFTGTAEGGPNWVEYLTGCGLKPGLTDRSCKTQL  
WDFAFAGADVSEEF TALHHNWTVPLVNQTQQFLTWIEPEFRRLKITRQNTLVAIWIGIN  
DIGDTSKRNVSPPEL YNSIISTIFTESVRPLYEAGFQNFLVNLPLDRTP LNMVKAEP LPN  
KTMIGWDDTLQKSDAFATQNE DTVFFYDANTFLNHILDNPLDYGIRNSTGYCPGFL  
DADEVTDPAKYGCIPIDAYFWFNTGHMTSHVHSFLGPDVEKFLREQSSK

>9531\_t gene=9531\_g

MMNSVLYASALLAAFKGVQAGINLSAQNIAVYWGQNSINLVEASGGQERLSYYCENG  
PQVDTLILSFVTRFN GEGGYPETNFANAGDNCTTFA GTQLLDCPQIANDIVTCQGLGKTI  
LLSTGGGTYNEG GFSTEAEIAAANLMWEVFGPVSSNSSVLRPFGTAVIDGDFDFENLG  
MSNMPAYANQLRSLYSQDKSKTY YMTAAPQCVYPDYADGPMLAGAVYFDAIFIQYYN  
NGCGVNSYVPGATTQWNFNFNVDNWAKTVSLNPNVRCYIGVPGNTGAGSGYEP PAT  
IGEVIDFVSSGWT SFGGIMVWDASQVWANS GFLSGVYSYLP SGTTTTPTTTTTSTTSKVT  
STTKSSTSTTTLITTTT SKTSTTTT KSSTTT STAPSTTCPVSGGSCSTNGAYACTGSSFGIC  
DNGAWVIESCASGQVCVQAGSGVYCGATGSADPVC

>9557\_t gene=9557\_g

MTLVKSILLALAA GHVAQAQLNTAAKAAGLLYFGTAVDNPDLSDSQYIANLETADFGQI  
TPANAMKWQPTEPSQGSYTF TQGDQIASLAKSNNDYLRCHNLVWYNQLPSYITSGSWT  
NATLIAALKEHINGVVTHYKGCYAWDVVNEALNEDGTYRQNVFYQYIGEAYIPIAFA  
AAAAADPNAKLYYNDY NIEYAGAKATGAQGIVKLVQAAGGRIDGVGLQSHFIVGSTPS  
LATQKANMASFTALGVDVAITELDIRM TL PETTALETQQSTDYQTTTTACVQTKGCVGI  
TIWDYTDKYSWVPGTFSGQGDACPWDSNYNKKPAYYGILAGLQSGTTSSSSTFSTLITTT  
TPTTTSSTATTTTTTTTSGTSAAHWGQCGGIGWSGP TTCASPYTCQVLNPPYYSQCL

>9564\_t gene=9564\_g

MALKFETISLNVQGANLKIATY TQNLHAKTPIFFLHGFGSCKEDLADIVLHQDFENYSFF  
AYDAPGCGDSRTDDISFTGIPFQIATAEAVFNHFNITKFHLIGHSMGGLTALLAQRHPQR  
VLSFVDIKGNLAPEDCFLSRQIFDFPAEDPVVFFDDFINRTRSAMSFGNPLYASTLRARVR  
AGAVRPIFESMVQISDKEDLLSTILGLPFPKMF MFGDENRGLSYLKRLEKGGVELAQIAE  
SGHFPMYSNPVLMYRRIFGFLQQINQSIRCNGSIGTDLS

>9584\_t gene=9584\_g

MRITRCGIHGFHETLGIDVDEL RFFWSIECDRPGTRQVAYRVEVTTDKEALERNENQVSD

YVWDSGRVESDNQRNVLCKPTNGFQSTCSHYWRVTWDDAGLAYYSAVNYFFTAYPR  
SSRLLPPYSMNQTYMPHSSLIFRTWFEDEPNRWKAVWIGNGGDRPIYLKPIQLVDQPVR  
AILFASGLGHFNMTVNGKSPASNHRLDPGWTNYHRRVQYTAYDITQSLGLGENVLGVHL  
GNGFYAGEKGGEGRFFWPMYEDNTYVRYGNELCFFGELHLFYADDRHEIISDPSWQVR  
DSATTLANIYASEDHDRRQYPVGWDMSGFDASSWVPAKPVTGPRGHIYYQTQPPVVLH  
ETFEPKTHSPKPGIVCYDLGQNSSIMVKITLQGTAGSEVIVRYAESVKEDGTVLMPLDF  
KEFENGVYSRIHLAGGGLEVWEPDFSFTSARYIQIEGVSTPDSIQGELPVVHVSVGRHIS  
AARRLGMTRTDKEDVNSLLNALYWTFQSNLFSYHTDCPQIEKFGWLEVTHLLAPATQYI  
RDMESLYSKILDDILDAQEPNGLVPTMAPEMRYMCGPLHDTITWGGAIKLLPDILLRYY  
DSTHVIPKVYPAAVRYMEYMKMKERKGGGLIEHGLGDWGRDIAFGNHQANIETAIYYRC  
LQCVAIMATELGKVNAAHFTEWADRIAKVYNKHLVTDPPSRPYAYYTSLDNYPQRD  
ATAVNQALALQYGLVPEEYRDDVMRAFLDDTKDGRIRAGEIGLRYLNTLGDARPD  
VLQMARQEEHPSYMRFLRRGETTLSEFWQDACRSKCHDMLGTINEWFYASVGLLRPVG  
NAYRNFIIIEPTYESEFNIEGEVDSPLYGLITVKNRNVKSGDSKGTTLRVITIPFGTTATI  
KLPLSADEVADRMVFGDEKIGKKVGGQTIELSHGIYTVVISSICRKM

>9590\_t gene=9590\_g

MAKVLSELLASAVLASHKRENTLGVKYGINADSMISYDGVYFGYAPNYNPQVTMA  
HLNAATGQKGATYNVYSQLRSSNVDSGSYNGNDQYNVEDIISGAVLIASLMTSIDWTD  
VSTGLCESVASYFENTFTSKGVTVWLRFAHEMNYADSGTYPGGKNYNEFMTAWRNM  
YNAISSNDKIYMYWSPNDDITSEPAAPWWPGKEYVDIVGMDYYPNADQGIPDFATAYG  
AFYDITYAAANGLPFAIGETGIQTSSGGSASTAQKEKWLKNIINPDGGFGNYSKYMSCT  
WFEYGPPTNSIDYVVYGGQSTVVDETIANTESGSA

>9603\_t gene=9603\_g

MLSHDTQKNRLVYQYDFEKVFIEPWGPNALRVRATHQPSLPSNQDWALNSSPDLTSIKA  
TIKIESDSVGGTITNGKITANISPRGKIIKNTETGQLLLEEMRNRNDQLDPKCSALLVEA  
REFKPHAGRDDFHLTMRLSIDRNEKIYGMGQYQPYLDLKGDLLELAQRNSQASVPFA  
VSSLYGFLWNNPGVGRAVLGKNVMSFEAYSTRVLDYWIVAGDSPKEIVEAYADATGK  
VPMPEYGLGFWQCKLRYQTQEELLSVAREYRRRKLPIDLIVIDFFHWPLQGEWKFDPV  
YWPDPDAMIKELNDLKIELMVISIWPTVDIRSENYEEMLEKGYLIRTDGRTAMNFQGET  
VHFDATNPDSRKYVWEKARKNYYSKGIKVFWLDEAEPEYSAYDFDNRYHLGSNVTIG  
NIYPREYARAFYEQTEAGQENIVNLLRCAWAGSQKYGALVWSGDIASSWESLRCQLA  
AGLNMGMAGIPWWTDDIGGFHGGDPTKDSFRELLVRWFQWGAFCPVMRLHGDREPQK  
PQHGTGGATCLSGAENEVWSYGEDVYAICEKYSIREQLRDYTRGLMKEAHEKGTPVI  
RPLFIEFPEDKNAWAVEDQYLYGPKYLCAPILYSGQKKRSVYLPKGNWTFKDGSIKGD  
HGEHFSGQQTVEVDCPIEVMVVFVRD

>9605\_t gene=9605\_g

MKRYLTILTLAGAVAAQVSAWQC GGIDYTGTTTCASGYLCVFNVDWYSQCQPGSGT  
ASSSVSTSTSTSTSTSTGTPASIRYLGRVNPAQELTWPGTGLSFVFNNSAIIIEFAEVNGT  
NSVDLIIDGGEPTAISNVNGTSISTPGGLAQGSHTVELRKRSEALFGSLFVGNVTTDGTSS  
VESIPARKIEFIGDSITVGYGLDGTYPCTNTAALEDNPKTYAALAANALGADYSVVAWS  
GIGLTRNYVSTTVDTSPIPERYTRYGANDANSYTFPSDWIPNAVVINLGTNDFGYLAY  
NASGQAYDARPPLNITTYTNAMVSFVQSIQKHYKDAQFFLMTSPMLSDSFPTAEDAQHT  
TMSKGLQDAISQIGANAHLVDWPTQGS AVGCDYHPNAATHAAEATVLSAISTVLGW

>9622\_t gene=9622\_g



MASFRFFSVFLWSIASLVMAAPVAVETDYDVIVIGGGPAGLSATSGLSRVQRRTLMLDS  
GIYRNDPTRHMHVIGNDGTVPAVFRALARDQISRYNASTTMRNATVTSLESINNGSYY  
RATDSDGEEYTARRIVLGTGMKDILPITPGVAEGWGWKGIYWCPWCDGYEHRGQSFILG  
NLSVDMGSVIEVWTLNQDIIAFVNGTNTPEQQAALDAKYPNWEAQLQAYNVTINNETIV  
SIDRLRDGSTNNDPAQDLEFDLFRVNLTDGSSIERAAFITNFPDDQOSTLPRALNLTMDGT  
KIKVGTNMKSSDNGIYAIGDANNDGATNVPHAMFSGKRAAVYIHVELGRVDSLAAIGK  
RGLSARELEEEANQLIGDGLEHLWKRAEESV

>9648\_t gene=9648\_g

MAGSFILALAALPLFHGALASPSGLEARVTGTLDSWIAEESSFALEGILANIGSSGALASG  
AASGIVIASPSTSNPDYFYTWTRDSALTIKQLVELFIAGDTLLQTHIEEYISAQAYLQTVSN  
PSGGLSTGGLGEPKFNADMTAYTGAWGRPQRDGPALRATALIAYGQWLVDNGYSSWA  
LSNVWPVVENDLAYVTQYWNQTYDLWEEVNGSSFFTIAVQHRALVEGANFATSLGK  
TCTNCASQAPEVLCYLQSFWTGSFILANFDSSRSGKDANSLLGTIHTFDPEAACDDTTFQ  
PCSSRALANHKVVTDAFRSIYTINSIAEGKGAIGRYPEDSYVGGNPWFLCTFAAAEVL  
YDALYQWNRIGSITIDSTSLAFFEDVYSSAAVGTYSSTAYSSIVSAVKTYADGYLSIAQ  
TYAPSNLTLSEQYDKSTGVSISAANLTWSYAAFLSAVNRSDAVPAAWGETSASSVPAT  
CVATSATGTYSTATATTWPATLTGGSTATTTTTATGTTSKTTSSSTTSSTTKTTTTST  
ACSTPTAVSVTFDLIATTTYGENIYISGSSSQLGDWDTSDAVALSAADYTSSDNLWVFTIS  
LPAGQSFYKFKIRKESDGTIEWEDAISNRDYTVPAAACGTTTATVSDTWDTD

>10538\_t gene=10538\_g

MAGYESSHGRVGDYPVSSNQEVQPPIDPAIDPRLFDSSYLTLDPGSEDVGFDDFGQYAPL  
DTTSMISIGQRLLQEQVDLSGSNDESEDDVDDYDDDVDRLWNEGKEYVDEYSA  
MRAAPEDPDYQASTDPESEDDGYDANDASPRPRKRRRRGHGPFSGRYGARGGKGIKR  
GPRRPLEPSPEFKMLHSQATEAFIDGDYERATELVQQAILVNPEMFAAHSLLSEIFLARGE  
KDKAVTALFSGAHRPRDPTVWHKVARLLQERAGEDRQKTLNDMIYCYSRHIEIDGKAY  
NARFQRATAYRELGYNRAASEYERILKELPHNIRALRHLAETYIDMQDVQKALDYLL  
ASIDYYMTLDNDENMEFSWSDVNICAELYAYVGDPRKGLQLLSSVSRWLLGRKDDTM  
WDAYIDDDREWDAADSPRIKTDGFIPNTYPLDSYGLGLPMELRIKLTFRLLKLGDRYFE  
EALAHFEWLNPENDSETSTVFDYADLYREAADALKDAGLFREALRFYRPLQLTEDYAD  
VSFFLAMGECFAFACSDLSLAESCYLVAENDPTNLQSRVNLAKLYETMGERDQALFYV  
NQAVLLGREARGNRNRRDRRIAQLAKEFQGDTHISTRIVPRHLANEVARHEILQSDA  
NRPQQVQYLYSKMNDLRPKMRAGDSAATEDWLDIADALLYDFRSNRAFYPQLKHMIFL  
GYSREEQKGGKKKTVMDEVQEVADRLQEWLGQTNPEITPTSIPNDYYGISFDEWFEIFL  
EYAFVVSGQGDKDEAYDILGAAVDASVWYHYKDKVRQIHICWFTCALRAYDEETLVSE  
ARWFTKEYQFVTDYRFLSILSRICGDPNRSLFHASPSMKFMLRQVKAMDSTLSGDHHS  
TRASTSKSLTTRQSTAKASRSSKNPPSHVSLTSRQDNGDVITAENMDVALLVLYGHILYS  
GNSFYPALNYYFRAYALDPENPGILLPIALCYIHHALKRQAENRHYLILQGLSFMSLYRK  
VRCQKQKFDQAAATDANEETQNEASSLSECQEVFNVGRVYHSLGLLHQAIQYERVLEL  
GERIRIAQSRNAGTNRDQGAQDNAKDNTKDNLAEDFTPEAAIALQNIYALDGNVAG  
AREITEKYLVI

>10573\_t gene=10573\_g

MRTSTIVQLAALAGLSSASSYSLYDDYPTGLDFFSKFTFFTDSDPTDGYVDYVDESTAES  
AGLIYASGNATYIGVDSSNVASGSGRNSVRLTSTASYTHGLFVLDLAHMPGSVCGSWPA  
FWTVGNSNWPNGEIDIIEGVNQQSNNAMTLHTSEGCTINDSGFTGTLSTSNCWTPAQPGQ

SNNAGCGIDATSSATYGDGFNSAGGGIYAMEWTSNYIQVFETHESAPYDLTSGSPDPST  
WGEPAA YFAGDCDIDSHFSAHQIVFDITFCGDWAGSVWSTSSCSSLASTCDDYVQNNPS  
AFTDTYWLINSLKVYSS

>10581\_t gene=10581\_g

MFSRALTLSALVGGVLSIPVEKRACPNIHVFGARETTASPGYGSSITVVDDVLNTYSGST  
AEAISYPACGGQSSCGDISYSSSVAQGIAAVASAVNSFNSQCPSTEIILVGYSQGAEMDV  
ALCGGGDPNQGYTNTAVQLSASAVSMVKA AIFMGDPLFRAGLSYEVGTCAAGGFDERP  
AGFSCPSASLIQSYCDASDPYCCNGNNAATHQGYGA EYGNQALTFIKGKLSGTTSTGNT  
TTGTGGGTVAEWGQCGGQGTGATA CKYERQVSGAGTQSEALEAAIAAAESYMRALK  
LADTPREKQLLDSKCKDWISRAEKIKL DKS WRPTTPRVENNRWLKEPVSKRKLSTREEII  
LLDSAKLNGFLFPPWKNPNPQEFELIGNERQFEDKTLRLSVPQKEVFNGWKRPAELIEE  
LGRGSVTPDALKLPKTKVMDLVQDITD C SVIASICAAVARFERGHGCLFHS AIFPFDY  
NKNIPRNSRSGKYIFRLYFNGCYRKVVIDDR LPSKTSRSLFAFDRNSPESFWPALIEKAY  
LKL RGGYDFPGNSGTDLWVLTGW IPEQIFLHHEDVAPDQLWRRISGAFQYGDVVLTLG  
TGELNSREEHLQGLIGRHDYAVLDL TESGGYRRLLIKNPWADSNRTPQRSRAPEQNEL  
DASSP L L P G S F W M D Y D Q I F Q N F D N M Y L N W N P G L F T T R Q D I H F T W D L S K A H F I S T C F A N  
SPQFSISTVAGGPVWLLSKHFLT TNSTKSNKSGFIS IYVSKKGGHRIFISDDAFYRGSFV  
DSPNTLAKIDMEANSTYTVVVAEQSLPLVPQNFTLSAFSRNEVVLKPAEDKYSETYQLES  
EWPSTAGGNTESPRYSPNPQHVLQVSETADVL LILETSEPDMAVHAKLFWSDGKRISTV  
KKRDIITDSGHYRPGCVVAETEK LHPGSYTLV CSTFLPDQIAKFNIWVFSTKCKNVKALP  
SEAAGRLAVLSDV GILPPGVDRILAPLTVLRLTRLKLIARSRNSTIGTRHVTSSPMLLTVEL  
GQGPYKEVLASSENGEYSDAVSGIRVPDFDARPEYAEKGGIWIVIERIGGPVGQVTDCVD  
VEALGEERVEIGEWIAS

>10582\_t gene=10582\_g

MVAFSALLAAFAAVVPSIAAPASGIPVERDVALSKRGP HDFVLGAENRLDRRTAINYIEN  
YTTGGTVDFSHSSTGFSVIWSDADDFVVG VGWQTGTNIPITYGGSFSVSSGTGLLSVYG  
WTTNPLIEYYVIEDYTNLPGYWG TIRGNFTSDGATYTIWENTRVNQPSIVGIESTFRQYVS  
IRNSPRASGTVTIQNHFSEWASLGM S LGTMNLQVVAVECWSGSGFASQSVSNTGSTSTS  
GATGAGVPTVAE

>10591\_t gene=10591\_g

MRWQIFSRAAATASSLLTNALPQNVTNGQSVLGTLDAPLLSKYLPGLSQGYPWGNRTV  
WNTDPTDFPNTGVTRYK WELSVGTVAPDGVPMNNTLLINGAYPGPVIEANWGDWIEV  
ELTNNLCCEGTSLHWHGLLQQETPWF DGVPVGTQCPIAPNSTFTYRFRADQYGTSSWH  
SHYSAQYVAAAQGPLIIHGPTNVDYDIDLGPIMLSDFHEDYWWLVNVTMLPNGFGSA  
GFFAADSILINGKMNYNCSLTTL PCTDNAGVSKFQFESGKKHRLRLINSGSEPIMKFSIDG  
HKLTVIAIDFVPTVPYTTNVVTLAVGQR TDIIVEGTGSAGDSYWMRADTSPDCSDVGST  
NLTGLAAVYYEHTPTDKTPTTNS SVTNDQLTTCDNDDISLVPEYAMAVDPDSL TIEIHC  
VLWNGTHNVWYMNNVTFRADYNDPDLLEAKLGNTTFPVSENVYDFGTNSSVRMIVY  
NHMALASHPMHIHGHNL YILQTGVGQWYDNMTLINPSNPQRRDTPNVRKAVATNTTA  
ASSDYQGDPSYVVVQFDMNPGVWPFHCHIAWHVSDGFVMNILERPDDIVNNVNIPGI  
MAQTCRDWAAWTGGHVVDQIDSGL

>10604\_t gene=10604\_g

MAFVADGNAFDFIVVGGGTAGNAVAGRLAENPHVRVLIVEAGIPNPDQIEEITTPSKAFT  
LRGSKYDWAYKTTMIKRDDYERIEKPNTRGKTLGGSSCANYFTWIPGSKPTFDDWEQFG

GSDWTWDSCEYLRKCATYHDDEKLYSSDLKKIGTGGPVNISHADLVPKMPFRDALT  
QAWLDKGGVLTEDIYSGEMRGLTHCVDTIYKGERQGSFLYLKKNPNVTILYGVNSKKLI  
IDPITKICSGVTVISEAHGTEISVYASREVIVSQGVFETPKLLLLSGIGPASELSKHSIEPVIV  
SPHVGQHLLDHPIVFFVLQLKDG YGLDDHILRPGPLNDAAVSTYKDKDTGPASSGFLEL  
VGFPRIDERLNKYAEYREAKVANGGLDPFGPAGQPHFELDFVSLWSSAFQWHYPMPEK  
GSYMTVIVDLLRPLSEGQVTLNSTNAVTPQPNVNLNFFGNDLDILAMREGVRWYDVLV  
KGAGFKDIVVSEYPWK MPLDSDDDMKRAVLDRSQTGFHPCGTARLSKNIQGVVDPKL  
RVHGKLNRIADASIIPVIPDCRIQNSVYMIGEKAADIKAHEKDL YASKNVS NFVATSKL  
>10606\_t\_gene=10606\_g

MALPSQFHPHHHMDRRLGYDSGRPYDLHQGSFLRDLDRSAASVPRSRNQYPHPIQRPV  
SLNLDIPDATKVTKTAEHTLRKTPNGTLAAGYDGTGPDRAIQPPAAKHIVSSLDSRQQ  
HPSSHPTPSVDSYTWQSMPEQVSSLNYQNFPPAFQQDLGQNHSSGINSLSIEQYQSGAA  
TGPSWVRSLNLQPGVDSVLHQTPPIQLPAYYLNHGPSVPTVLPASLQSF LGPTAPVGTG  
PYGPYWPDGAYIPYRPA AQRDSRFGAGSAFSPDGSSARLFDLQNP TLNQNSYSVSNIPDS  
GFSWNQLPSSASNNDALLQQNKFP RSHHPSLNNIKDQHRNLPYHVRAASGLN NAPA  
RPLLHSNYSAPPSLSDPQARVQTAEFKEKVL SWAHGVYVDLLASLHHARKNSISNSSAD  
GKSQRNLKPAIFPKPPRQGLDFSTHIDMPRHNSYPSSRFDLSPYGSNRQPFNRQLERPMS  
GLMFNQRTHHTPQLNDGFHTIRKSSGASLAQLTGSVPSGSTTMAASA ALELLSHLCGES  
NWEWIDGMLLGGCLAYGLGDYQKATR WYSRIIARDARHVEAISNLAATFLALDQKEEA  
LQHWLRAVKLRPSHF EAVEHLINLLCTSHRGREAVNVIK FVENSLRVPQNGDYFRSDEH  
ASETESDAESTNSYDRMAFDYDNDLDQALAMKINL NDSISTGFASSGFAIPGSDNGRILA  
LVHAKGNMLYALGDNVGA AAFEE SILIAAGRRCRGIKGLIKQIVDAFSRNGYGRIGED  
DMTKNPLLLPPDRATQTATLVFPYGYPPGLE YVAEGLARKAAISTTSNLSLAKIYQD  
GMSTISTSGISKAATNGVRDILALYYLSLSLQSPSTANNV GILLASIQHNGPGKVRPR SIS  
GKNSIPQIPGVAPDSGIALALSYSYGLTDPKHAHLYTNL GSLWKDIGQLHAAIRMYEL  
AVQYDGNFDIALANLANAVK DAGRINDAIVYYKRAVKVNP DFAEAVCGLANALNSVC  
NWTGRGGVNLNGFGFIDQVHVDEKGLPRD VDSIQAGFGWMKR VVDIVEKQLRDGETWG  
RGILTSAAVEQLCAQVSSMSQYNGNARKLV SLLQSWAGQK WEGSRIVRLVERIIRSITW  
QWYQDLHVHGKEYPLSR YRRPQLPPGLLAPNAPT VLPFHFTFCPLSAKQIRHISQRNGLR  
ISSATLRS AWLPQTVYPPPKPPQPYLKVGYVSSDFNNHPLAHLMQSVFGFHNPNKVKAY  
CYATTASDKSTHRQQIERESPQFYDASGWPVDRLVDQIVRDGIHILVNLNGYTRGARNE  
VFAARPAIQMSFMGFAGTLGA EWCDYILADELSIPRDTLSPGRRDYRIEDRIFEEDHGEE  
LENWMYGERIVYTRATFFCCDHRQSAPDS DAPHIGWDREQERRWKMRKELF PSLPDDA  
IILGNFNQLYKIEPTTFRTWLRILSDIPKAVL WLLRFPELGEQNLKDCAVKWANEEIASRII  
FTDVAPKQAHARAQVVDLFLDTPECNAHTTAADIL WSGTPMLTFPRYKYKMCSR MAS  
SILSSALPDSEAGLQARKELVATSD EYRAKAI RLCRDLRYHPSQSDQRDGNCTGRLVEL  
RRMLFTHR WQSRLFDTRRWVNDLENAYEKVWSA WVKGEEGDIWL

>10609\_t\_gene=10609\_g  
MLISVSITSILSLALGLSSLVA ANHPEDKNKTCTVKPGGNASIDDAPAIYDAFNKCGQNG  
RVVFANTTYNINSVMNTSDFLNCEIDIYGTLLWGTNLTYWLNNSLPVGYQNQSTAWILG  
GTNIKVDGHGYGTNLNGGDSWYAA YGSVSNKAGRPLALTIAN TTNLEFRGVQFIRSQM  
WSMAIIRTHYAVFDSIYVNTSTAGKRHGNSDGADTIYSSHITFNNWTV DNGDDSSISLKA  
NSTDISITNCNFYHGLGIAIGSIGQYKGVFETIQRAHAKNNYFHKTT HAA YFKTWTGEQA  
GYPPNGGGGGLGFASDLVFENMTLNSLNTPTISQCTTFSGTAGNCSSEFQIKDIVWAS

TTGTTSSADVASFQCSAVKPCIDLTIEDIPQKKLEMASYRPHEGKLGIVTGGSRGIGEAVV  
RRLAAKGCN LIVYTSNSSKELTEKISSELSTTHKIHISVQADLTDPAVATPKIVDAAKEF  
YRSYVSGSKDELQVDILINNAGVGSNQLNDATKGPIDVTEYNRVYNVNLAPLLLTQA  
LAPFLPTDRSGRIVNVSSVSSSIGYEGQSVYAGTKAALEAMTRCWSRELYDKATVNAV  
PGPAWGDMYAQAGEKFWKINQPYVDAAPLAAYHGEEDVLQAAGDDAERFDKTVREG  
MGRRPFTSEIAGTIVMLCTEESGWTGTSVVCANGGMKMSIA

>10613\_t gene=10613\_g

MRLASALGGLVVCLVGQTYASSLEGTFNSPANISARARVQKPPRCPSSES YDTSQWY  
VYPSTSRVAMCNETMLLDFMVYNPVNTSDGRNSIRSCVTNGSGMPEDALATTSCYSVG  
LWNAAGSTGSSSSSSHASDMLLEDVSSYMAGNCRKTSIFAFSESGNIAVGMVVGSIHHS  
QNIDSAVQEVVKALESTDTFESMVLQHCNTANSTLGIAVDFTANLAAVQQLVRTWND  
GDCVSGFSTFSNVSTLSSTQFSILSDTVTSNSTLSKRNSQLHTSSAGLHKRSTCSYVQVV  
SGDSCGLVTECGITSDEFYEYNPASDLCSALAVGEYVCCSPGDLPLTPSPYANGTCYT  
YDVESGDTCAAIAAEYTLTVDDINSFNSQTWGWYGCDDLQAGASICLSNGTAPLPLPLA  
NAVCGPQVPGTDFGTGDNAGEWAALNPCPINACCDIWGQCGNTPEYCNDTLAASGAPG  
TAPPGSNGCIWNCGTIINNAVTPASYSSVGYFEATNDRPCLNMNAYTINPAKYTHVLF  
AFGNITSDFTVSVDGAESQFTLFTLEKVKRIISFGGWDFSTGADTYMIFREGVTAANRG  
TLVENIANFVTENDLDGVDVDFWEYPGEPDIPGIPPGSDEDGSNYLEFLTAMRAALPEKSIS  
ITAPGSYWYLKAFPIAEIANVVDFITFMTYDLHGIWDLSEAYSQSGCVAGDCLFSHVNMT  
ETMWALSMISKAPVATNMIMVGVSSYGRSFEMTTAGCWTSSCTWDAAGAEGPCTQTA  
GYISNAEINQILAQNSNAQLLYSSADETNILYNTQWVGYMSSANKANRTDYRGNF  
AGTGEWAIDLESFEPYLSSTPGEFDEYVDPGGEKLGVNEDIPCYSVSTSANTSAEIEQV  
VILGATTIDTFLTERADNQTDWYYWMVSGNSASSCSDFPSTADNACTALLEAFCSGNIT  
DGEFWASFLTSTLYANWVQWYNAFNEATFLTTLNISDIATTFPSQTESILTFSQFLNGFS  
TALSIGTSVLPDPGGALKDVSSGVGTLQSILTYLTADGTGVTLPPTEDIEDVMYFMLGNL  
VNSTYSAIFDLAIAIFQYPNETLVCDGGAHPQYCGPFNYAVSNYFYNVKPVSIIDTNDFS  
NLITGFKSTIQKFLVGVALATGDYYVVKTAATEPDCSDDAEFYINGACYKLAYPGLSSC  
QADLGFQASANKTTIAKIEQFGVDITEMILISEACQNETLTYYGVDVNDVDSGTLPL  
LCFYNLVPVFGLLSFDPDGEELTPTGDYFSPCWVTVYQNTTGTPIVGQTYLPDNLKSAYDR  
SVCCLIPGSCTGGPAIGVTNGTIYGILAVC

>10614\_t gene=10614\_g

MSGYGAFGITLRTQNFSKDMGETSIIPWLERGGLVVKAAIRGGGDRGPAWHEAARREK  
RQKSYDDFIAVAEDLIERGLTAAGHIGVFGQSNGLLSSVMGTQRPDLFGAVVSDAPLT  
DMLRFPNMGMGAAWIHEYGDPKDEKMANVLRSPFHNVDRDGVKYPFLVTISTKDD  
RVGAGHARKLVAKLKDSGSKNAFLLEEKDGGHNMSDPFRKSRLMSQRISFFGEHLF

>10632\_t gene=10632\_g

MGNLVSAYCGLGRWQEAIDLGNKTTTARKRVLGNEHPQTLTSSINLASAYRGIGRWRD  
AELLQLELVRRTRIRYGRKHPSTLSSIGNLAATYDSMGRYKEAQSLEEELVAQGRIVLGE  
THGSTLTWKSNLASTYREQRLNDAEKLESEVLETRKSHLGGTHPLTTSMTNLATIYR  
EQDRFEQAAKLEEKVLDRFRSVLGEKHPNTLMTSNLASTYWSQGRLLDAAASLETRAA  
SAMRAVLGETHPVTLTSKARLAMIYHSQGRYAEAETLTLQVLQTMQGSFGETHPHTITV  
MANLGSIHQSQGRWDDAERVFELVAQRRKEILGESHPETVASIENMKGIHRMRARR

>10636\_t gene=10636\_g

MIPSYAKVIAAACGLASTAAAVNPVVVQKDFVDVTVTGNRFQIVGVVDYQPGGSSAFKG

TADPLSDSAACLRDAAILQYLGVNSIRVYNLAPSANHDECASIFNAAGIYMILDVNSPLD  
NGSLNRGAPWESYNPIYMAQVFGVIEAFKNYPNTAGFFSGNEVINEDSVELVPNYIRAV  
QRDMHDYISKNSERDIPVGYSAADVRPLLVD SAYYLTCNLTNSTASRSDFFGLNSYSWC  
GDATYTSSGYNVLTEDFTNITVPVFFSETGCNNVKPRVFNEIEAIYGPDMSQALSGALVY  
EYSQEANDYGLVNINDNGTISLLIDFENLRSQYNKLDGFSITAHNSSQTAITAPVCDPKEIT  
SNITKSFAVPDRVDGIDDMIKNGVTTNVSVGALVSVTSTKINQTVYDNNGNVVTGLKLN  
VLSNGTVNTPSNSTTVSSSGSGTSSGTSSSASASSTKGA AVSVRASALTGLGALTAMAFL  
AL

>10683\_t gene=10683\_g

MKLSYLAILPALRYDYGQEGACGCGTSSGIDSWQLGISSGVYTAAGSQALYDTAGATW  
CGAGCGKCYNLTSTGSSPCNGCGLGGVAGESIIVMVTNLCPYNGNQWCWPQVGGTNQY  
GYSYHFDIMAQSEIFGDNVVNFEPVACPGQATSDWETCVCYGETATDVTPVGLTSGG  
GSSSSSTSPHTSTSTSTSTSTSTSTAGATQTVYQGCGGSGWTGATVCAAGSTCQAENQW  
YSQSPQLGRTAAPLQTTIPLGPDETPITSHHTPPSDRLTPRNVSSQAVAGIHSRDSSVSG  
PRGRPLDTSGRGLTTLQPQSRSRGQSQSKSPESNAGRSDSVIERKPSLSSYGHHRKTSIVH  
GIQHSRSPSYTPSAGPLSPEIIASAGTGS MAGISLGSEHIFANRAEDSEPILKFPANGNGP  
APPASGLSTIQDDDEHLTLGQTVTRSSSVHKKMPSNSKLRREHSHSRAHSKNHQEAKT  
VGEYALHHLFNSFVAYADNKINQSIVKVGEVETPVVEEVCGEGADPVFDQLISALGHIARN  
KPKPLIDTIMLWRAKGEAATS AKNPQKLQSTEIGHLLRRNTEPIQPATSESDLGSENAPP  
ASIQKDG VQLLERRATVSVYLVCRVLIEIFNQSTVEAIGTEMTERLEDIVFGQLKAVDPEQ  
IAASPLRMANWRIYQLLGKMSEINFSTVTTRFLNELERYQKDAAMRGQTRELDAKAEL  
LILGMRHFSIKTYPEEA WARSCEYM RSLARLFVNAHGQRVKQAYCYIIEKVLISIAANPA  
CDVGHPLWKDFLEIISPRILQMIAPRHWMTAFPLQTILLCVSSKDAFANQWLSIALNLP  
ARLRDRPTRGLALQALCRLWTYLFRYPDSPNITLKRVDIVRVALPPGRRTYLTTEASV  
ADPLIQLIRMIGFKLPDLCFRNIIIFPLINSDLFLSGRELKIEQMEPEKMVVGIRSFLSIMCDL  
EMGDQLYPPFAGPISTHFVDIPNFLPPRPQLLADPKLRAVVSDPSNLACPVDSKLN  
VAKDYVYVQFCEILGKITILCDNTFGGQAALDEKFGSGSTPKTPISEAFSFGRRDDHASLIEQ  
RQSFYDLLHVA VQVLPRLSDHIPNSLINLLCTGTAHVQPNARSSAESLKSIAQRMHAQ  
QVTIGFARFIFNFDARYSTMSDEGMLGPGHIESTLTLYVELLHIWIEEQKTKDIATDQA  
ENSASSGTRALQLDLSSVLAYVEEIEAHGIFFLCSQSRVRRAISVLRVTEFDSALGKE  
NTRIIRILEADSHQIMDLNDEHLTIAERSRLQKGKRRSTSQNTLIELCSSDVSYDSSLWVK  
VFPNIIRVSFDTCPVA VTLAREIVCARLVQMHRNITALAESQRLQYATFDMAQGRSLGR  
ARSPAEIMIEQWKLYLLMACTTLSNVGAQSQSQLANA E HARRTSKGTQTAQDKIGSARA  
LFAFVIPLLSASLDSIREAIVASLGSINKALYRTLLESLQYAVTTCNEEAKLRIGTHNRTPS  
SPRRSRKTDRLRTEVTHVYKITSTFLREAEIFNDDWIVNMMVTYSKDLRLFLSDAEVQND  
WEFQRLRFHYCGLMEELFEGINRTKEPSRWMPFESRKSASFSLMEGWCGYSPSQAQIAQR  
EDSMRRFAIAQHNDPSDLRNPAAALIEIEKKNLQSAALSAMSSLCAGPISTTTEGGSILQFD  
VGRMLVWIGSIFETVSDKLHAIGRRALKNLITHNKEYPFLLERMIDLCYGVDRDRRLGD  
KALESYFEVVNQVLIEETDYAVAFWRIVAVV MYMLGNEKRDIRMKAVKLIRILEERQQ  
KNSRLQDFDISLSDKTTAVYKLAQFEISKRLASQYSDIGFLIFSEFSRHFTQTMSTDDQRN  
VVTAILPWVQAMELQVDPNQPTPRSYMLLVNMLEITVIRCKLLPNEVQALWQSLATG  
LHGGNVQVILDFIISLCLERKEQNFVEYAKQIVVFLSSTPAGSKVIEFLLHVAPKYMIQE  
RKDEVESTPDCRGLPYVANLNEILPIGNKQAGLSMGQLSMIFLVDLIVGPVTLAVQDVIK  
LLHVVLILWDHYTFTVQEQAAREMLVHLIHEL VSSKLLDEVSTEARQAIEHFVDSIRKSDA

SVIWEYEDNHGKDEDDGTRVPPAMTFVTRQVVQFLNLVHEDISDHWSKEALNWATSCP  
VRHLACRSFQLFRCSKSLDSKMLADMLARLSNTIADEETDYQTFSMELTTLKVIKSLA  
PADLMQYPQLFWTTCACLNTIHEVEFMESIGMLEKLLDKLDVGDPNVAVATLSGAQPPR  
WEGAFTGIQDLVYKGLKSSEFNETLSLLHRLTPLPDNVLVGDSNRLLFTILANIPHFLHQ  
FDAGLNDPKIMERANLLGQVADRQGERLAACLVGAFANAQWKKEQDFLQHIISEICSYY  
FPAQEVQSLVFVMGCLTNATRWFVRKTLSSILSVLIPMDMRRTTEITSHGPDLSPLRLQ  
TELCPQALEVMDHIMTVSGNPMKHHLRMSMASSSSSRAIRKQYERIQSLYGIPEPTGWS  
IPIAAQSATTRHNVHAVFYTCAEADRMEAQRVATPDVEFSTEDYSESFYSSMRTDTM  
KSIDTQTDGNMGEIVQRDLSLDDFFDEDDFGFQTPSMSSFSEMRGYPGSFADTSASLYDQ  
QTAPILRKSLARTPSSSSFHNGLAETSRPPTRLDGVFQITSPALGPGPTSAPGGALRPMHS  
RSVTPANHLVNHTPSLSATSLSPHPIMESTLLSDSEVEESFSDIDERAGLHPSTSRSTQAT  
SLARKGSEGTSSLESMIRSGMRRLTGGTASSREKERQRDLLRAHQRAVAQTANSRVPK  
VPAEYLTGSVSSPTSPGQAGAPGGA

>10691\_t\_gene=10691\_g

MKLCHLAEAAALLLSHGSLAALPSNTTSWQQYVYAPSERRLPVAVLSTTGNVTNAE  
ALVSGSGVAYFSRAPKQTSFSPWPAGTTAQGSSEAGSNTVNGAVRTYYASNAIDGNLTT  
FWNDATPGVYPTLTITAPSAVTLDGVTVESFSDGVPVDYTIETWDGSNWNTAGSVTGN  
SALRSRVTFNSQISTTQVRMTVTKDQSVSAGEYSRVAELWPLVADDAVAEAVDFDQ  
NVVGFLSIDTVGASTNAPGIELAFSESELYLTERSDFTRSDNGNQITQGTDHATPAAPYN  
WTDTLGCTYNGVQVCSDDLHGFRYLKISIDTLPTDDEFSTPAGWVDIASVSLNFTAYLGT  
PDSYSGWFESSDTALNEYWYAGTYTNEMTIDTFLDVTVDVRNTGNQTLVGQTVLFDGA  
KRDRDPYIGDIAVSGKTAYLHQDTAGAVYNVLADLGNHQSSNGWIPPASLFNYGVQLF  
DYSFYWVIFWDYIYLTGDDQVQPYYSNLQNLNWNWVPTVADSTTGLLTKSESQGWG  
DYGFLSRYGIVTYYNALYVLALQDAKIANVNETDDAEKWLQANTISQAINDLWD  
ANVGAYVDEMGGTRHAQDGNIAVIAGIANSSQAASALGYLAENTAKFWGNFMDDD  
SLGSGTSDRVYAFISYFDLDARFLIGDADSALDEIHRLYGTMRSDPGITFWEGVGTNGSA  
YEGAFTSLCHGWSTGVVPLTHYVLGLKPTGPGYETFSIQPAFPTNLTWARGQEATPYG  
DIYLEWTVDDDNRTHIFSSPASTLANVTVPMANLVSLDGEVLWSSSGQTTDAVAVEGN  
FVTLINVASGNHTVVVSQ

>10695\_t\_gene=10695\_g

MTGVKIVDFTKSSGGYYAPATLAPTNTTEVLVYVSGQPGSTREGIVPIDYESQIHLSLNNLR  
KIMIIGGVTVKDILKLTLLIVNYDPKQRRHARPLEKFLAGHRPAITLIPVAQFAIPSWLFEIE  
AVIASPPLSSSIPRQLSLEPAEKTVDVIIIAGLAGLAAATELQRAGLSFIILEARDRVGGKT  
WSQPLPDGEQGVVDVGAAWINSTNQIKMYALAKKYGAEILEQNTTGKCVLQDADGKC  
STFEYGDLPNFDAAVVKDVARIRDIVEADCQTLDPQPNADWDSVTFEAYLRSRDASI  
EALATATVWTRAMLGQDPKDISALYFLAYCRSGGGLQMRSDRLGGGQHLRVRQGTQ  
LFSGLAKDLPEETICLSTPVSSVTQNGTFSIDIEVTTTNQKKHFARKVITVPSPLNTIRF  
TPDLPFSSKLLWSESAVYGYTKAMMTFRTPFWVEKGYCGLTQSFTGPASVIRDTSSLPD  
QRHVLTFCMAGDPGRAWAALSTEEREKALIKQIGQLFSSEVEASGDFVNMVITYEWILDP  
YSGWGPCASLAPGVMDTLGGSGLREPFNGVHFAGTETAVNWRGYMEGAVESGERAA  
AEVIQGLNAGALARL

>10707\_t\_gene=10707\_g

MKLKQVSFFVNLQRLLLVTSSLAGKVLLVSLVLYGIAFEYCRLRYWRDPHSAFFDDTH  
VYDLKYSLYREHEALQHISAYNARIQPPSTYASSNPRMCLAFVTVKRHDVNYFDASIGS

LLSGLDDTERRVISVNVLFANTNPEIHPSWENFQRLQALEENHNWYKKGVDYDYTYVLD  
QCYVTGAPYIGIFEDDIIFADGWLAKTLRTLNDIDHRLKAKNWLYLRLFYTETSLSWSSD  
DFAYRYMGVIFLVAMIAACSALLLIRRTLPNTRRHLDIATIAVICTITVPAFTGLVFMIGK  
YNITPLRGVEMNKHGCCTQALIFPRDQVPSLVNFLRDRNEGQTDSLIEEYADRQILRRF  
ALAPPQVQHV GIRSSRDNLEINTRSTWAFWFEENDPVALRREHEHFETGDITLSDAR

>10710\_t gene=10710\_g

MGASRSMRSRVLVLDLPVQLILFILSFSIVSTAQNCSVSNPCSTGCCSKYGYCGTGSSFCG  
ADVCVGTCDYATNQCDATNLCAIGCCSKFGICGLGPDYCSKENCVSTCDAKSECDPDN  
WGLDYDTANFYLLQNDINGIKGRIFRNNAIRDDDEMGRNIGDFLELTGAWAEFFPNMLK  
FQATRFTFNWVNEKLQELEAVWNQQPNTNTEKAQVLTNIWKLKDSALRSIRGEVHGLSL  
VDPEGPEDCSDVEVPGHGYTDGYSADCQRLKDTCNNLYAALMRSQCAKTCGYC

>10732\_t gene=10732\_g

MAVTTKATIASFGGKLLKLSHNAKTTNCEMSFNLYLPPQAASQKVPLLIYLSGLTCTAD  
NCSEKGGFFQHGASKKGI AVL YPDTSPRGLNIQGEDDAYDFGSGAGFYVDATLPPYDKGY  
NMYSYTEELPATVFEAFKDQIDSSRV SITGHSMGGHGALTLFLRNPGKYKSVSAFAPISN  
PINCPWGQKAFTGYFGSDAQEKWKQHDATELVKTKWGPLNVLIDVGTGDDFYKQGQL  
LPENFSKAAEEAGVKGVEIRYQPDYDHSYYTMATFSDDHVEHAAKYL

>10750\_t gene=10750\_g

MRYSTITIFAAVAACGVP AHLV GREIPSKTAIANVHVWDGAGFLAPSTVVIIDSIITNAN  
AADAEIVDGNNGGYLMPGYIDTHCHVTSCSYLTAMRANGITTALDMGTFPVS AVTACR  
AEGVTDIYGTGAAGTVNGTAISKIPGFPQDSFLVSPEAARTFVANRIQEGASWIKVFLDPL  
GPDEETLSAVVAAAHAAGIKVVTHAPTYADYSEAQTAGSDIPCHVPLDNPLDAASIRNL  
TSAHRHVPTLIMMQSVVNNTRAPYTAYTAAEGSVTAMNAAGVSI AVGTDANTSPYV  
PANPPFGTSFHEELALLVAAGLTPTQALQGATSVAAHAFGLYDRGSIIPLRADLVLLSA  
DPTLNIA NSKSIEYVWLAGVQFRPEA

>10755\_t gene=10755\_g

MTFTFIAAAVAALGLVFPVLSTQTFANTGTLTGWSSQNIHEGSIDQVTNVVYNGTTAL  
KFTQVYDSSYTGRYHSEKIETQVYKLG DQGFYGF AFR LQEAWQASPAQSYNIAQFIADF  
TDTGCDDWMPSSMVWVIGDQLATRVKFGTICAQQIQEWKGLATVTPGVWHTIVIQASW  
QSDDSGYYKMWYDGGKVVEEYNLPTMINDARPFDFHVG IYANGWHDQGENLGTQGT  
REIWIDSVGMGTTFS DANPALIEG

>10767\_t gene=10767\_g

MKGVNERERGNALYKRGHLTEAIKAYQEAARLAEPDDYLPWSNLSAAYYEVGSFHDSI  
QCAQRALAIQRHGNENGIPSTTELKLI PRIFRGYLHTHQYDAARQWLHRLADIQNPSS  
ADDLRQYEEALDHAESVWQAF PDEGAYSLRLLAELPRSQSALIQINGNPESTKNVNLDH  
VTALVDFAVHSNVDRDFS VFLGGIGDARHFYAQLAILGVTERMVMHSTSPLKRKYRFSL  
NDRNHEAIARNLVLLVLLDELACLTEISQAERTEIYTTIYYL FAGVIIIPRYASDRFIHTVDSI  
VGRLRNNEPILPWLQIHSDNLHLISALQSWLDIESNNRLSMSNVLDRTVQSLCNTNMPH  
KSGCDVDSIPKAPPGCQKEFETYFNLPLLQAPRSVMREYEP ELLQLIETNAPLESIRTYVA  
GNWCVNPTLVVTEETSGSSPFDVCRALYNIVSMQERGGPKKTKLFDYASSFFQM VVVA  
LRKIRGRLSVEYVLGDAFVAIDGIRCNLGQNRNIATPASYDLIHLFGSCDVPAVISASKIL  
NESQAARLMISVPNSDFDLGERDSFAKIDSVTLHKVTQM QTIPKKSQYGS SHPLLNEYLL  
EMRRERLAPFPYEHLLSRAELSRFLFSEFYSLAWPFRGNSTSASAGLTYFFDLIHLHSIG  
YPAHWIADALAKILGDGINASPSPPRTPDETTPRNQLCTNTAIRGALGSIAPFLAETSTLAS

MFQRLLPFNPIVTLPLPLNTIYQYSIGFKSDNAYLPQKSMALMIYNPHAYIPTTCLSLPEEGC  
IIISIFTYASDNFARVNFWRREDIINQLQSSNETWHCNLLCTTDPSSYNSDDEIWKPCS  
EQSVSIENIIKGEKWISEPPFGTHEGGFDAEAMELDA

>10769\_t gene=10769\_g

MPGSPEDEASPYSFTKDSSASNLQPSETSHTQSPDDPQHGTMTTHRQHSRSWLTQARI  
WRFLMSIGMFFHTVGVWSHGPPRPSFVRRIPFGTRGRKVDLYFYCPSSYWQYRNKSRRLA  
SQRPFVNVNFHGGGFTLGSATDDSYWAKCVLKETDAVFVSVQYRLAPEHPFAAVDD  
GVEALLYLAAHAGELGIDASRIALTFSSGGNLAITVPLRLQERLKNDAASDILNISPFDS  
TQNLVTENQGNLQIVATFAWYPLDFVASRAHRRAMSVIPGKTMPSSFHTLFDSEYLPN  
HTERSSPFASPERATDEMLAAGLPHDIFLYTCEWDMLLQEGQRFVRRLEDMGKVRAM  
MVEKVPHAWDKSPNPRDQGKINVFYKAACGEMKAIFDHS

>10775\_t gene=10775\_g

MVEYITVNGASLAYEITGPASAPLMITLHGGRGMGMHYPSPPLFSDGSSDNSKETTQ  
TTYKIDDSPLFSACPLTTAAMDKAPAQSPIRSSNSSTISKVIICGGSFGGFLAQQYAIKYA  
SKVSHLILRGTAASHHHEEGAIRTLERLHKAPNFSSQMLRNKVFGAYEDDDEFKLIYFA  
MMPLYTEVFDPAALKACRGMVFAESHNDLYSEEEKYFDYTSQLGKTKTLVVVGE  
KDWICPPENSRIIANGIPGAELLVDPANHSVHIEKPEIVLERIKEFLHL

>10776\_t gene=10776\_g

MAQAHEHFIQSLCDLQVPKTLQLSPDRSSVLYSTELSWGHRKKGKHSVSTIWLASTGHAD  
SSRQLTQGLFRDYAPAWSPDGNVAFVSDRADAGSKWAIYLLPLQEGCEAYPITPETSTS  
PIEAFASPDPGSRIAFLSADEDTQSASAGDPPDVRPWGESWRFRRLRVVDLRTKQVRS  
KLDHRHVKSVCWSPDGTRIGFSSCLSPDIEPHITGTTVSAIDADLSSVENVCHFPKMVIDL  
SWAADGSLYFCGGVPPDKTFAGYGVYRANPATESHHYEWVGFVEDDSIGLIQRGSGTI  
FVKVQHRLESRVCLLDGTVLYCRKEELEAFDSAMESDGKFLAVATSNINQPAEVFTTL  
SSGSGAMTRLSNHGQEFAGHRFGTCSFLTCTSadGEVELDALYLSPASSSDGANRRPLAT  
LVLIHGGPNTRLTNAFNYYMLSPYLLSLGYGILLPNYRGSSGRGQHFASYSIGGLGVY  
DYSDVIALTQCAIDQGYADKERLLVGGWSQGGFLTNLCCVRNDLHNTDWRFRAAISGA  
SICDIDAMALTSDLGCAFEPELSRDGVAWNMDFDDTRNRAPSALWAFKDAQRASLQN  
APVVPMLILHGEADARCPVSQAWGLRRALRSYGLPFEMVTYPKQGHFFEDQKYWVD  
MALRIGRWCQKYIGDALV

>10782\_t gene=10782\_g

MGVSRLKYYAAWILASAALTNASLQLVPGATWTSPNTHAHIQAHGAGVIEVDGTYILI  
GEDKTNNGTYFQHVNCYSSNLVQWNYVGPLLTVTTSGDLGPERIVERPKVIYNASTKKY  
VLYMHIDNSSYGEAKVGVATSDSVCGTYEYLGWQPLGYQSRDIGLFQDDDGSA YLLS  
EDRANGLRIDSLTNDYLNVSAAVHLFSDMEAPAMVKLNGYYFMFASHLSGWAANDNE  
YSYATSLSGPWSSWQTFATVGSPTYESQTNVLSFPGNNTVMYMGDRWVSTDLVAST  
YVWLPLTFSGTTVTMADYTSWVPSVSSDSWSTAPSANSYYGVNATLSNGAVIVSCSGC  
YDNEAAGYIGGPPSHGTATFTGITTTSAALSTVQIVYRNGDSTARYANVTVNGVTQLIEFL  
PSSSPGTSVINCNLKAGSGNEIVITTTDGTYPDIGTLIVPQK

>10791\_t gene=10791\_g

MATDSFDYIIIGGGTAGSVIASRLKEGSPSLDILIEAGPDVSSRTDVLDTQWATLLRGEL  
DWGDMTVPQSHVDGRVLPNFSGKALGGWTRGEKENYDLWAQLVNDRRWSYDGLLPY  
FRKCETYWDPKGDPAVHGFDGPIKMEPAVDRQYPLREKVKDAWAAVGVSYKRDMDND  
GNPIGLGELIENRVNGVRHIASSVYGLKDVEVL TETLVKRVIVTEKDLLKVATAVELASN



QGDASHRIITARREIIVSAGTYRSPQILMLSGLGPQKDLQEHGIETVVDVDPDVGRHFQDHC  
CVNQWWKIREPEKGLAVGSPAFDNPIFFKGLPLDFIATQSVPEEGLLKALIADNITTPELH  
AVASQHGHEIYVMYLAFNEGDPFLIPDGTHLTTSTMCMLPTSRGSIRLKDANPESLPLID  
PNYLATETDRYVLREGLRKIHKVLREREIGRRLIVSEAVEEGGRQVSSDSTDEELNELIRQ  
RSVSMGKVVDSELRVKGVDRLRVVDASVIPVPIAGHIQNCVYALAEQAVDMILASREA  
>10800\_t gene=10800\_g

MMRSMTLVVQLCWLIALLMKCTDAQLQERVVSSNGMTNIPNLKYGLFVHLPGLTVN  
HTGVVDDANILANSFDADQFANDLAVADVQYVVFTSWHSMVALWPSEKMLEWEL  
PDHRVDRDLIGDMIAAVGNKGVRIYLYTHPRDGFETDADREKTGWGIDPPSNGETYNP  
GADFNRTKWNAFIEDIYGELMQRYGQEIDGLFMDEGSPQGDSETVVNYQQLRTIHKDINP  
NAELIQNDYGNLYGLDMGMKEYGGWGEFAQPNESSLWPSYAEPVAAIFTEQWWAAQTT  
STIRYSAGSMLRYTAFQAATNSEGAGIAWAAGPYADGGWEPGVMATLQQIGSWMSGIQ  
ESIFDTRPSTSYPTKPGTIIADVSWGSATKSADDSTEYIHVLPKPPAGLTLTLPAPRDGKIFS  
NASRLPDSTPVVLSQNIENGLTLTITGSWNANLTVIRLTVLSRSGVPVLYRCTNSIHHIDTTD  
SGCEAASYLDGLLGYVFAIQLSGTVPLYRCYSASRGDHMDTTDSSCETSSYVLDGILG  
YIYNAQIQNTVPLYRCYSANREDHMDTTDASCESSSYMDGILGYVVV

>10806\_t gene=10806\_g

MRIGRQFALGGLLYASIGLANLFPSYEPLTYTQSDGSSLPADNGTVFKLSSDGTTPSILVL  
DYERNVEGYATFQVIRSSGNTSVFEMSYSETRALLDNYMADGPLPLAAAMDTYRIDRY  
NITNQAYTNHLIQGALRYQKLNLSAGELELSFLGFIPVTDNLPLSDLPGSFNCSDPVLN  
RIWGVGARTVQLNEFPANSLPDFWVITDEGALVDSLAPQPFADFATALTTYELDFSVK  
PMSNGFGFTVLSDTLNGIYIFVDVAHSSISAHSGSTELDTLPLVSAILPSTVSLNKWHTV  
HSTVNNTDITVDIDGLSLLNFSQSSSFGSFLGASLGHSAIFTNVSLTAFGTKMYSSPLTN  
SSALQDFLLGTNPLPVSDGSRDRRIAYAGDLDTTGTAFASYGHDIYINGSMNLLGSFQ  
LLPGFFVPSVKVQPPRTEDIQANITGLIGYSFSLASAMAQYYEQTGDTGFLTYWAPKAA  
RLFDWAHSQTLGSGLLNISNPAFGGDWNYDPPLSGVVAKFNLVYAYALNRWLPFMA  
DGGLNTTLYTSRLESQNAINANLWSDTLQAYYLSSEYTDFFSQEANALAILSNTASGNH  
TANTILDSLSRELYVRAGALAFSNASSASGWAQKISPYASGYHLKAAFHANDSTNAKKL  
LHSVWGPMSDPSHTNYTGCTWETLDADGTPGLGAPTSLCHAWGAGPTADLSRYVLGIQ  
PLVPGFKQWQIVPQTLGLQWARGSHVPRGTIDVSWSFNNSGLEMVVIAPPGTDGTVY  
LPSPLQTSKGYQVSGCTVVNNSTFLVKGQVFTFRQTK

>10810\_t gene=10810\_g

MPLALSNA TSASIFCIRKVHPLLEVGVMTLVSHDESPPSYDVAMSNGYVQAFTASRDDG  
RVDVTIQAKQQGLADLLRAGIQEDKQETLEAYPVDVVALNIVIQIVGSRGDVQPFIAGT  
QLQREGHRVRLATHENFNEFVRQAGLEFYSIGGNPEELMSFMVNNPGIIPKTSTIVSGEIG  
RKRQMI EEMLHGCWRSCVEPDLITNTPFVADVIIANPPSFAHVHCAQALGVPLHIMFTMP  
WSPTREFPHPLANIRSSSMDPSVNNYLSYSMVELLTWSGLADIINKFRLETNLNLEELSTRT  
AIRLMETLKIPHTYCWSPALIKKPSDWPLHIDVCGFFFREEPSYEPKIDILQFLSNGPAPVY  
IGFGSIVMDDPVAMTSHAETCSRLGIRAIVSKGWSKLGHNCHAPNILFIDDCPHEWLFKR  
VAAVVHGGAGTTACGLLNGCPTTIVPFFGDQPFWATMVAAAGAGPLPLDHLKRLTATA  
LADAISYCLTPQANQAASKISAMMKAEDGVTNAVTSFHRHLPWKDLRCDPLPSEVAVW  
SFGRKGKISHKAMLILTGQGLDIQGVKPYRSNKLHIEKPLTDPLSSTSGVLINTTARFTK  
GLGNLAIDPVKGTQMTSSLVNGALVETPIALAEGLRNVPRLYGDAPEKSVPIEDWKEG  
VTQAGKQLGCDKLDALLTRHVLMGTGQGLYTGADGLSGFITKPYREAKKDGAAGFA

KGFAKGSIELFVKPGAAMFGLMAYPAMGIYKSLKNRNLNPTEAKILESKIALGNYLFQRS  
PPNPEEVKMLSTFDRLS

>10826\_t gene=10826\_g

MDDL YPHRGFMLDTGRKFFPVEAIVNLLKLLHQYNFNIFHWHIYDAESFLLWPADGEL  
TKVSEKYSHSLEYYSPEDIGYIVKYARNLGRVYPETDMPGHCDIWGLWKKDLVVGTPD  
LKHPNAQLDITKAITHDYIRDLVSTVDRYFGSDLHHFGGDEVAMVWHTDNRKHLATF  
FEWLR TIPRCQHKTLLILWDDPVTTELGNVDDISTDWVIQTW HNGVTQSVLEKGYKVIV  
SESETFYIGNADCEKINNFMPAHRNVLGFEVWFTSERDDPSNLEQSWIVEPLRAAAQI  
RRRPN

>10827\_t gene=10827\_g

MAPTGNAAEILHEPQAYSKAIDSSEDVKKYPVVLTRAIDLEDGTQSPGLPQPVSEKRTL  
QKFWSRKTTAKEAAAHKHESKNRTHKRIRPGRYRKFVWVLARCLTFYIPSWFLKKVYQ  
MDDYRLRLAFRQKVLFCLLVAVIYIVVSYFLIIPVFCVMKVPLGMFSSHGNFCIIVRHII  
WIYMGVCGAFMLLAAYCAVKTRYTPTSYYEHDTLIVMHVPCYNETEYVLRKTIDSCVA  
STYAKKRKLLFVADGKVASAQNCKPTYQILLYDIFNHKTDLESGIDVETKRYPSYDEN  
GTSDNFAFCCTGYREVYPVVIVKVGRTDEQTNAPGNRGRKRSQLLVYNFLHYVNYH  
QRGGGVSAAPL FETIDFQMRMLGIDARYAMYMLVADSDTEIEPTGISYL VHQLERDQK  
LIGVCGYTGVSNPVDSV VACSQVFYWLTHILKALESVCSVDL VLSGCFTIYRLKWAY  
NNEPAILHPAILDDYAGNYEKT LHEHNLLSIGEDRYLSTLSIRYFASECRQRYFSAAVCTT  
TAPTTL SVLIDQRRRWTNSLIHCHFSHLNILPFDASVWAQVMLV FVIGCELFMV LILPLAL  
PAGIVLAALNLF SPLAWPILLGFCMIPVALCVLCNDWRYIPFYLPFFPMIIVYSIIPLFSL  
WKQDTVKGKTRDVD

>10837\_t gene=10837\_g

MTPSFSAPNNVWSAPALNNPSSTTPPSALASSSSTALDIPIYANAAYYPNWRIYKKQAPSS  
LRLGFVSHVYFAFAWVKEDGTVYLSDEWADSQMPVDGTEGCLRAFIQLKQYYPQLKVI  
LSIGSGKGSENFAKVATSPA AVANFAYSARALVDQFGLDGIDVDWEHPSDIHQGEGFV  
YLLSQLRNALPSPRYT VTCALPAGEWALKYINLTV AQQYVDLFMIMCYDFSGPWV DRA  
GHQSQLYTPSNPYSAAA AISCQSAVTYILSQSVQSNKILMGIPVYGRSFGADNVNEPYS  
GTDGDDGVFDYCDLPRPGA KEVYDESIGAA YCTGGSDGGFVSYDTPQTVEQKAKFVTK  
SRLGGLFYWHITADKRGVNSLLETGYNTLHDL

>10839\_t gene=10839\_g

MAKVAIVFYSMYGHVAKLAEAEKKGVEAAGGKADIYQIAETLPQEVLT KMYAPPKGD  
YPIAEPDTLLEYDAVLF GIPTRYGNFPAQWKAFWDKSGGIWSSGGYWGKSAGLFISTAS  
LGGGQESTAI AAMSTLAHHGFSFVPLGYKPAFGQLTNLSEVHGGSPWGAGTFAGPDGSR  
QPSALELEIAEIQGKSFYERVSK

>10859\_t gene=10859\_g

MARSYADPNAIPNDWRSRQP GFTIWILIAIPRILLTLFYALYFIPKSLRQHPQW TYRQAF  
VSWVIRFAFHIVTELGYSPNLKPGNLGDKWV VIEPIKSADDEYYGPF RDVSVKPDRI  
GTWYPEAPSKTADDDSLV VLSFHSGSFLWITGRPIDSGVTADLVNRKLGPNTHSLWIQY  
RLAGGRTP TTPYPGAMQDAITAYSYLINELKVSRRIVLAGDSSGATMAVALLRYLAIINH  
GHNESVQKH FSTATPPRACL LFSIDYTI EGDAQAMNQHRNASTDLCEGKMAAWG TSA  
FADKVRLDSPYLSPKLHPFATPVPIFIQAGGA EVMVDSIRGFADVMQQAGSRVEYLETPD  
VPHDIYGGGHVAGWKTEQEEVVEAASV FVRNNDPTMALSSVV

>10882\_t gene=10882\_g

MHSIQLLLAIFWINVVF AEHEFYSTWMVDSMIAIGITPTRYTTQATFYRGVESVYNKTQD  
TRYSSFLTSQLDAVLTSNGSFVDWDYTSHQLDNIRVGETLLFLYGATGDVKYKNAADFL  
RHQINQQKRTVSGGFVHKDPNYPNQMWLDGLFMAEPFYAQYTSMFEPDNATAWDDIV  
HQFDLIEFHCPNQQTGLRYHGYDESFAAVWANNVTGASPHVWDRAVGWYFMALVDV  
LDWLPESHPGHSRLLKYFTKLAMGLKRNWDSQGGWWLVMDAPYPGMAGNYIESSGT  
AMFIYGFLKGIREGYLDKNSYDEIAKRAYDAMVEKFFVGRNKTTAMLTWEGTVNVGSL  
GNASYEYYISQPVVENHLNGAGPFVYASVEFEALQES

>10883\_t gene=10883\_g

MWLSAALATIIFYLASAQNAPFGAVGFGAIATGGNSGTTVYVTNLNDSGTGSFRDAVSE  
PNRNIEFQVSGYIKLSSAISLSSDITINGQTAPGSGIGIMGGEVSASGKTNIIRNLRMRQGT  
LSDSDGKSAFNMGDASNILDHCSVEYGQWDSVDAVAVNITVSNIIALPIGQQFGAHV  
ETGPATFYGNLWVSAHNRQPLAKSNTQYINNVYNYQAAAYTVADTSGDFYHDIINNYFI  
VGPSTTSSHNAFFQINSQTVYAIGNYLDTNKDGVLNGASYNTVGSATVASTPFADTSL  
MASLTATQAYTFVLENAGATPRDEVDTYVVSLVQSLGTEGKIITNQDDTGLSNGGYGTL

>10885\_t gene=10885\_g

MLKYLIVAAAAILTRVEAQQSVWGQCGGNWWSGATSCAAGSTCSTLNPYYAQCIPAT  
ATSTTLVTTTSSSSVKTTSPPTTTTAKATTTATTSPATPTTTAAASGNPFSGYQLYANPY  
SSEVYTLAIPSLTGSLAAAATKAAEIPSFVWLDTAAKVPTMGTYLANIQAANKAGASPI  
AGIFVYDLPDRDCAAAASNGEYTVADNGVANYKAYIDSIVAQLKAYPDVHTILIEPDS  
LANMVTNLSTPKCSEAQSAYYECVNYALINLNLANVAMYIDAGHAGWLGWSPANLSPA  
AQLFATVYKNASAPASLRGLATNVANYNAWSISSPPSYTSGDANYDEQLYVNALSPLLT  
SNGWPNAHFIMDTSRNGVQPTKQQA WGDWCNVIGTGFGVPFTTNTGDPLEDAFVWVK  
PGGEADGTSNSSAPRYDYHCGYSDALQPAPQAGSWFQAYFVQLLTNANPSLV

>10890\_t gene=10890\_g

MRSFLAAPVLFQQLSTLPFATAITVDANDPNLSKSAASTAAASAVNYNNRESKLIPGK  
FDGTWWEWGGAFFTLINYPHWGTGDDQYNDLVTEGLSWQGGEQNDFFPSNYSSYLGN  
DQEFWALAAALTAIEQKFPDNPGHASWLELAQGFNDFVARWEVDKSSCGGLRWQLY  
PTLAGYDSKNAISNGAFFQIAARLARYTNNDTYATWAETVWDWSSTVPLFDNSTWKIY  
DMTRISQNCKDQDIMQWSYNYGSYATGAA YMYNYTNGGAKWKEGVDGLLNTTWNEF  
FPSDYGGNILSEAACDPILTCNRDQVCFKGLMANWLSTIALIVPYTYPTILPKLQGS  
AVGAGKQCSGPDSACGMQWFNATYDGTSAIEQEMSAMSIFANTLVAFSASGSTSGSSSYTAP  
DTPAPVTANTGGNSTSNPTGGQSNTGYQPPKQMNITGGDRAGAAITLVFASAWIGMM  
VWLVLGGAN

>10894\_t gene=10894\_g

MAMKDLLLYIFFLIGHMVLGAATNQRCSGNTANDRSKWCNYDINTDYNNVVPDTGVT  
REYWFDIRIEILAPDGVPRYVQVINGSIPGPTIHANWGDEVVHVVRNDLSSSNNGTSIHW  
HGIRQNYTNQNDGVVSVTECPTAPGNTITYKWRATQYGTWYHSHFSLQAWEGVVGAI  
VIDGPASANYDEDLGAIVLTDWSHETADELFFYDKKNGPPYLENGLINGMNTYNDGHR  
QVGQRFTHFQSGSSYRLRLVNTALDTHFSFSIDNHTMTVIAADLVVVKPFTTDVLP  
IGIAQRYDVIVKADQAHLANKFWMRAVPQTDCCSNNSTDNIRGIVYYGNAQGPSTTGY  
NTTTGCTDQSGSLTPVVSKSVSQDFAYYENETVSLGTD SAGLFIWKVNDVSMLIDWQNP  
TLLQVYNNVHNWSSTEGVVEVDEPNKWWFVLVQSSLGIPHIHLHGHDVSLAQTGT  
YDPSTAVSKFNNPARRDTAMLLAGGYLLAFQTDNPGAWLMHCHIGFHTVGG  
LAIQFVERYSEIRGLIDYNTLSHTCNSWDHWQNSEHLVDIDSGV

>10895\_t gene=10895\_g

MPFLTYPAALELQKELRGTDAEVITLADDDYVESLDRWSATSEKEAVCVSSPHQSIHSLL  
ASIQEHRLTNADTTMLIKGAIKVTTAEDVSTVVEFAAKRYIPFAVLSGGHSTKGASSTY  
GGIVIDLGRMNHVDVHTSSNRVSAEGGAKWADVDSAAAQHDLAVVGPTVNELGVGGT  
TLGGGIGWLTGKYGLVVDNLIEAQIVLADGSITTAASENPDLFWAIRGAGQDFGVITRF  
TFKAHPQKNDVFAGALYLNPKLPQLVDYVNDLDSKLEDEDQGLFFGFTNSRGKTTIVVI  
LFYNGPQAQAELMFEPLLSLSTGQEEIGMMPYYKTNQLFNKAAASGGRKRLSGTSVTFP  
LDPDFQSVYQNFSQLNDYSEDAEALLFFEMLPYTKVVEVPNDATAYANRGPYYNVCS  
IFNWQDQKADSRIRSLQQGLMSQIRDEHIKKGPGVGTYSNYTGFDANARDLFGENLPR  
LKELKKHYDPRNVFRKWHDLQLQTGASV

>10899\_t gene=10899\_g

MKTSILSVACLASLGAATDILLPLYIYPLTGAWDAVYNAAAAYPDVTFRLLIVDPDSGPGA  
GPAAAWTEYPDSTYIAALAKFKSYSNVQTIGYVHTSYTKQDISTVETNVSTYAGWKDYT  
ASNIAVDGIFDEAPNADDSTYTEYMSNVASYARGLGLDYIVFNPGLTTAAAYYAAAD  
LIVNEEIIYSSYSESSTVDTIPSEYRGQSAILHDTTPSSADISSVVSTIVSAGIAAFYATEDCC  
YNAITASLLDSISSSLESA

>10900\_t gene=10900\_g

MEFHSGVTLCFILIYTLGTAIAQDSLPTVNLGYSIHQATFNGTANLYNFSNIYFASAPLFSE  
PRPVNTVNHTVNTGQIAGICAQSTPWWLIASAQLADNSSDAALQQVNKTYGSMEPLYSS  
GNTSLESQAQYDFPRTLQECLTLDVVVPKGIWDRRTPVIVWIYGGYVSGDKNSAGNP  
STLVSQSIENDDCSGDIIFVSINYRLGMFGWLSGSPFQSQGGAPNLGLLDQRAGLDWVRK  
NIHLFGGDPNRITVMGQSAGAASIMHHLTAWGGSGKAPFAQAIQSPAFAPYIGQDIQDR  
NFQLILK WASILNGSDVTTLHQLRNIPFDVLLKVNQLSTTPAFWGTMTWAPAVDGVVYP  
MPAGLMLKQGLFDHSVRIITGHNSNEGAIFGSPIIDSEDEYLAYLEQLIPDAANSTIEYVN  
KVLYPPIFNGTQQYRTQGAREVHTITDSAFICNTRYIDLAYEHLGAKGYFYDVAAGNHA  
QDLDYTFNDGGIISGAYEVNVSQAQQMQRFTNFKNKNGSPDGESVPTLPLYGKNSILWS  
IQGTPTVDDAATEQCKWWQEAHYLPWR

>10901\_t gene=10901\_g

MGFRTSTLSTLLLLAARVSAQTANAEALATLQEWYNPTTGLWNTAGWWNGANAM  
TVIAELAAVDASIVQEATAIFETTFNVAPSANPSNGVEKSVTANGLIQTSTYPAGWPNETV  
SKRATQDPTDPTAWLDGANDDAEWWGLAWIAAYDVTGNETYLTLAGIFNEIAAGWG  
TNCNGGIYWETTNYVNAIASSELFISLAAHLANRVPANAATYIAWAEAAWNWFASTG  
MINANGTINDGLTTDCVNNGQAVWSYNQGVILGGLTELNRISPNEYSIESANSIAQAAIA  
ALADSNHVIHDYACEPSCEPDATQFKGIFMRNLLLLQRASPNDLYSQVIEACAASIWAND  
RDSTTGELGVDWAGPFDTPADASTQSSAMGALVAAISVELGIGLTNTLCQPSSIGEISVRI  
GESVRGDDVYILQSTAPGSVNDGLMELNLIHACRTASARSITALIPNYPYARQDKKDKS  
RAPISARLVANMLQSAGATHVITMDLHASQIQGFFNVPVDNLFAEPCVLDWVKGNLDP  
NNCVIVSPDAGGAKRVASLADRLGVGFALIHKERPRPNVGRMILVGDVSNRTAILIDD  
MADTCGTLAKAASTLEEHGARDVYAIVTHGVLSGPAIETINNSCLSGLVVNTNSASDASQP  
TTFRAS

>10902\_t gene=10902\_g

MLNEVTLDSSPGPLMYIPESKLDLRSNEIATELKSYYKVTSSDKNVWAFWHTGFDA  
MHPWTQRNVINWVRRLGPSWTVRVLDKVPGSSVHVSNFIPAEQLPEPFNADTMTGPNV  
GPHSGDMVRLPLL YLYGGVWMDVGMMLFRHLDDTCWNAIEDSSNSYEMAGMSIEINP

GATNMLNGFIAAKRGNFIKRWHDIYMEIWRDGRTEQTGLHKHPLLTHLPILYAPT NHL  
NLPGALKIGPEDFTDYLGHFQCFERLRKLVDPVDGFDGPKYHRENIFMLPAMTETWK FQ  
LLTAWNGKKQFELLSTKKNIKHSDKTELYEEANGFVLDLLANTSTMKLSHGPPGALDS  
FLADIWDHKDNHDKDIEPGTFAEFLRYGVSVHFQTRLLHPAPVPLSTEKTFNISVLQPYT  
E

>10906\_t gene=10906\_g

MISIFVAEYNRWANEKRRLKHETPPSTPTGDVEKALMVMQNGAPGEITRCMAAIVGYR  
EDPDFYRALESYKATEGLDFTLVGVDGDQAADMDMVRVFMVYYPKNSAVIHLDEPL  
GEIAMRTYSKLVDPDMCSPEDIDYCNELTIAHCCQLAREILREHDIQLDKTQPGGGITKLC  
IYEPHMHKKAIMFTSFIFSIVISEVLDIEFMWSSDSDTIVLPDSLQKTIATVAGDENAGGAS  
SGLIVHNEHDTLWTKLGSVYWCELYLTRSTSASSGTSDCQSGPSTVFRISALPGVLYSW  
YTQKVMGKRMIVNEDRHLTTNLLLRGWTVTYVSDTLTATDTPTLSRWLLQQVRWGR  
ATHIETFQQPKVYLLNHPVFFWAAMKREVGPLIVFFSILYYLITGHPFVYFCWWDLVFRA  
GYTHIYNWLRNPDGRPTNGFAWIVPALLFYNLPLPAIQVWSMATVLEGGWGTTMRSNSE  
MSKQNSQLWKRWHDLGGSRFDSLSYARRIPESFSLQIPGLNSDLEIQGINFISLPSEPGH  
DEPVSVCFIWHLHVYSSRAAVRRTPVKRSRQMDNGTSATDIITYIGVPLAVLGVLPILYSF  
IRAIVVQRSIRRTLYRHGLDSSITRGLMEGIVEVELPRCTITPLDRDEDPEYWKLN SHQ  
VFLKGGWSVFNWNTLV TGRQLVRCQYKDELRIPEADIDFEDLIAFLDRGAVPDPKGW  
RLLK SIGLWTPTGTALLPPRGKPGTVLKVATPDNADGLLSLQVNWKQEWDRGSFSLP  
PFWVRLKQPGCGKLLADGKETMDEPESFQTKDDLSESQETHEPPAQDISRDSTLV TETET  
TSEMSASQPLVKMIEEGKLQITARPND SFRFKLDGDRVQKVLFEDEE IPTGEIREMASAG  
DTVNLWFISAASSLSQSLECELWNFTIPNQITSFVKRKSVP CGVMVLLGILNDDDVP PWS  
SPPPSLHETVHEMSERMKDMYERRLESAMPPAQAAEASRVRMMRSANEFHNQH MAR  
QKAFQEYEDRRLVEAIQSSRLENGTVAQATLAYLIAKKVVP EYTTKDLAVAVLYLMV  
VDNAKAKLIGDILERWALWSQFGGMQKVQLELLIKNKIAFCYAAALVAVVYHAESGDS  
NPSTDMLECLKSWKRVR LG

>10907\_t gene=10907\_g

MLPRKFYKDNRKIPLGFMLLTTTLFFYYLSLHKETASNFDIPSEQQVSR TDDSSATYQLL  
QVSQEQRKIQIEEYQTKSERVPEVSSHLP SQTPPSLYTPPTPDYASQGALKTSEV ALLLKT  
GASLVWKRLPIHLLTSLAPERIAPENTIIYSDVPDVIGSHQLVDVLANTTSRAVLESPDFQP  
YLLQEDFDEKQG WIEGDIAGPIGGWKL DKYKFLPLINHAGHSQ PDAKWYIYMEDDAFIF  
LPNLLHHLATFDWKDAWYIGSLAVKHGEIFAHGGAGFALS RGAWEKTFGAHPDIIEKYE  
NFTEAHGCGDHVLGHV LKDYGVTFGETHEAEQFTFGFN PESYWSM WYGQANWCKPIF  
SMHHMHLKDISRSYNMEKAWNFAKNGLMRYRDVYDTFVAPVIRRRIDWWDNRSSSYA  
ITSSEAKAGEDMWMPDSVKSRLSWLKSWEVDNCEAA CLSWPECVQWSFYEDLCKMS  
DRVVLGTGYTATDPRRLTALKTTSGWVSKRIEQWSCER

>10910\_t gene=10910\_g

MYIKSILALSCASVALAQLADTTDYPIGPLTSSSAK WAKKVCNITNYGAVADGKTDSGP  
AILAAFEACASGGVNIPLGTFAMATWVTL SGGTAWAINLEGIIVRTGTAGGNMIYIEHS  
TDFEYSSRGVGAIQGYGYQFHEQGEYGP RLLRLYDVTNFAIHDIALVDSPA FHLTLDT C  
NQGEVYNLIVRGGNEGGLDGIDLWGFDIWVHDVEVTNKDECVTIKNPSNHIQVENIYCN  
WSGGCSMGS LGNNTNISKILYNNIYTVNSNQMF MFKSNGGSGEVTEVTLQNFIGHENAY  
SFYINAYWSDLANQGGNGVLYNSITVNNWKGTCANGATR PPLYALCPSTNPCTNIIIENF  
DMWTESGST EYKCADAWGSGYCLHGGTQHTEYGTVTSTVTSAPSGYSATTMPGQLT

AGLGITTSIAIPTVPNSFYPGATPATARVYGS

>10921\_t\_gene=10921\_g

MVAHGFLARLTAAALCLIAIPTSAAPEVEKRTGVVPALSGAEVVGAGTYPRANYLSDGS  
IISAYTAFANGDSIITIAHSTDKGVSWEIGTVAQGPTATTDIDNPYPYQLPSGRILVAFRN  
HDRSDGVYTFFRITICYSDDNATWTYLSTPASDPGPTNGNWEFPLRMAEDGTTLQLYY  
SRENSAADQDSL MRTSTDGGATWTSATVISGADTTDARDGMLGVTQVSGNNLIAVFES  
ETNGGKFSVHSITSSDDGTTWGNRQTVYAPSGYNAQAPQVTNVGGTLVASFQTDDEGG  
SGEAIKILTSSDGGVTWGNKLTTFPASSNWAGLLALDDDV SFLSLADHSGAKAQKVTLS

>10131\_t\_gene=10131\_g

MTPRRSYLVLLCSVVSTFGAPDSRNLQERASCVFSGDTGAESAIAANKNSCSTITLDNVF  
VPAGTTLDLTNLNAGTKVIFEGNTTFGFQQWAGPLISVSGQNIQVSGASGHVLDGQGHR  
WWDGKGSNGGTTKPKFFFAHGLTGSSQITGLNILNTPEQCFSSISGSSGLTISGATIDGRAG  
DAGSLGHNTDAFDIGDSHDITITGATVYNQDDCVAINSGTNIIFSNGYCSGGHLSVGSV  
GGRSNNVVDTVQFSNSHVNSQNGVRIKAVAGATGSIKGVTYDGITLSNISSAGITIRQD  
YTNKGYTNNPTTGPVITGLTLNNVHGTVDGSATDIVIECGSTSSCSSWTWTLVNVSSGK  
ADVCHNAPANTC

>10133\_t\_gene=10133\_g

MSPTTILAIIEPLRISKLSLVWRIPLLGIRCMSYFASECLSHYEISALNWRQKLAIAIYLKAF  
GKTFTEKQQAARSRVPLTGPRIRDYCRNRDLHREVRDAASFDNGHDFPTPVLHFVTA  
ASAQPDGPTIFYSHGGGYHNPIQAEHVFPVALCAEACKAKQVVFLEYSLSPEQQYPCQ  
LVQAVAGLRFLNNEHIPANYIILGGDSAGGHLTASLLTHVIFPSPYAPPIDLCGSQFRAVF  
LVSPWLTMLEKEQGVAPPQAQHDYLTERRIVRFTNMFQPVLEDEVWANPSEAPDAAA  
WKRLFPEDHGHAIKRAKILVVGTSITLKSVCVAFGRHMIGCGELLVNAKTDLDLIKEKDF  
VLAVISGEAHVQPALDCALRYYGGLSLKTLTFLASS

>10143\_t\_gene=10143\_g

MSKFDANRLDLEYGTVQNHLEVTILTPKTLPSHNPTKCPLL VYWHGGGFIAGDRMYE  
PWWSTWLIELALSQDAMIVTPDYRLMPEASGADVLDDVETFWTWLHHDLPQLAENWR  
GRPDLDAILCCGQSCGGLLAVHSPLIPEALIKAVISISAPLFGKVPYFTVPKPKPIMGMTL  
LPPRQAEARIRAYIRSMPPGAVRTQGDAMWELITCVVQQGWLPKLITRRSDDRDL  
REIERKKQLPAFWGIHQDQSIPSAACSELFVEKLVVAPDVALQVSLERGEHGFDAEVHL  
SETWVRSRCDWLSQHWPAPAPS

>10286\_t\_gene=10286\_g

MSFKTPVSTSQTHIEGLGKLGFEYSNGVRQYCGIPYASLAKRWTRSTLKT SWNDGFHD  
GTVLGPSCPHPQSEGDDSDLVVPPAAHFPLQPEVDELNGLVMNIVVPAASDAIITKLP  
VMVYVHGGSLLYGGANLPIFDVNLVSQSLELSMPILCVNFNYRVGLGGFLASQSIKRE  
LEQDGFTGCGNFGFTDQVAFQWVQKYIHHFGGDATQVTAVGESAGGISISHQMCAAS  
PPVFHRAVCMSGLSVSIPAWSMDQHEELFIATCRHFGIDPADQCALEKLRDVPQKLD  
ATPIIQGVLSGTGNAACLDWVYAKNPLEIHPSPSWVQEFMLGDTYHEGVIFHLNIADDSY  
EFIKHTMLQHIHDEEAVTQILT DYGITPGLSQDELVQRIEHMCGDAVFKIPNYATAKLCFE  
EKPDSTFCYHFDQLSRIKNQFEGTAYHAHELLYLFRNLENEFSAEVAMAKDFAAFWIR  
FVCGKDPWAIKKTGSTVKSQWVWGPSCQQLKCEIEDEEVRNYLRMERILAMGDGK  
TWTKWLMAVDALVNKRMRMGKNV

>10294\_t\_gene=10294\_g

MRS LAVLVTALAIACANAASADDWAKRSIYQVITDRYARSVDSPPDCNITQYCGGTW

SGLVDKLDYIQGMGFTAVQISPIQENLPEDTIYGEAFHGYWPQNLYGINAHFGTADDLK  
QLVSELHKRDMYLMVDVVA NEVAYSIGETNMTATNSTLIDYSVFAPFNQSSDFTPYCP  
MDWSNQTEYTHCWLGYEGVATPRIKTADPAIAATLDQWIADLVSTYSIDGIRIDGAKQIE  
SAFFPNFTKSAGVYAMGEVYDGD AEFMCGYQNLTSGLENYALYGKIIDAFTAGKMADL  
VSMVGAI RQACHSPQYLSNFIENQDNPRFASLTQDIALAKNALAFTILSDGIPKMYYGQE  
QHLSGNYSPYNRQALWPTKYDSSTELYNLTATLNKLR AHAISIDDHYITNWSSVLYTDG  
STYATRKGPNDAQIVAILSNOGLRGGNYTLQVPGVADPGTNL TEVILCKTVVAGENG TIT  
VPMGQGQPRVYYPTS NLNGSGLCGSNNSSTLS SSSKGSYGSSNSTSSGAPAA TSSLPHG  
TGMTVHASGWLILSALVSSALYML

>10301\_t gene=10301\_g

MTVISGATSKPIVVISCPPYPGHTNPLLIQAANLIKKGYEVHFIAGPESESSIRKTGATFY  
PVQTTWTDEK LKQLLSLPDGPEQFVFGFKGHFIDLTPNAMKALKGVLENLRERYGTTQDIVI  
LQETVAMGSLPFFLGAPLPKGYTEFPKIISLRTVPLAISSIDTAPFGQGLPPDSSKEGRTRN  
AAMY EAGKPLWADVAEYANNICGQLGATKKVEGPIMDFLFTIENVVLQPCSPSLEYPRS  
DLPKNIRFIGAPPREEINPETTQLPEWWDELLAAKKEGKR VVFSQGTFLLDYNMLLKPT  
TEALADREDFVVGVLGQQGATLDGVDLPSNTRIADYLLYDVILPYADVFSNAGYGG  
FLHSVMHGVPMVLAGRGQDKAEVSMRGEWAGIALNMRTDSPSVDALRDGINKVLGDS  
SLKERCLQIQHENEELDNL TQVEKAILEFARA

>10304\_t gene=10304\_g

MLKPQATATRELVS LDGLWNFALGSHDDEIDTSCTQFLTPKLQVPVPASYNDIFVDSKIR  
NHVGWVYYQRAVRIPRGWKGEKYFIRVDAATHHGRV FVNSHFVA AHSGGYTPFEADIS  
HLVPAGEEFRLTIAVSNVLTNESIPPGKVETLANGELKQYQHDFYNYAGLARSVWLYC  
VPQVYIQDVTVVTDISNTSPTTGIVDYQVIASTTQSEAQFRLSLIDEEGNLVAQSSGSQNR  
LLVESAHLWQPGAAYLYQLQVELLGTGDGSKVIDTYTVSTGIRSVKISGMQFLNGKPF  
YFTGFGKHEDSAIRGKGYDPAYMVHDFELMKWLGANSFRTSHYPYAEVLDYADRHGI  
VVIDETA AVGLNLAIVAGIHGTKAPPTFSPETINDKTQEAHKKALQELLARDKNHPCVV  
MWMIANEPASGESGAIEYFEPLVKLTRQLDPSRPCFANMAFNPVHRDLVSDMFDVLC  
NRYFGWYKHTGELDMAEEALHEELSAWQDKYGKPIITEY GADSLAGLHAVMDVPWSE  
EYQARMLEMCHR VHDRVEAVAGEHVWNFA DFQTT SQIFRVDGNKKGIFTRDRRPKAA  
ARVLRERW NKVR

>10305\_t gene=10305\_g

MNQGKAGTTHPSTLSSIASLATTYRNQGRWNKA EKLDVQVMETR KIVLGAEHPFTLASI  
ANLALTYWNQGR LNEAEELYVQVIETSKTVLGAEHPDTLTSISNLATTYRNQGR LNEAE  
KLDAQVIETMNTVLGAKHPSTLMSMASLASTYRDQGR LNEAEELYVQVIETSKTVLGAE  
HPDTLISISNLATAYRNQGR LNEAEKLYVQVLETKKKV LGAEHPSTLSSIANLATTLDWQ  
GRYDEAEKLDVQVIETCQTVLGAEHPSTLTS MANLATTYRNQGRWNEAEKLDVQVME  
TRKIVLGAEHPSTLNSLENLAYTWKSQGLQDALN LIESCSHLRSKVLGSPHPDSRSASR  
TFNDWRDEYNAITNQ TPLTGNSCPQLSVSSAALTAQSTFGAHVNLPLPYAQTQSITRSF  
LGNHPLIASKATSSEADIQDSQDVD

>10307\_t gene=10307\_g

MSRPRLLPAAYTVAVWSALPLESAAAAEMLDEKLC DPRNHGSNTDQYVFGRVGNHNV  
VMARLPSGQMGNNAANVAGRLT TAFPSIKFALMVGIGGGVPSRTGFINAPPKVLLNAI  
AKLREDHYRCLNDVSVHLSAFDRLVQFRNTTGP DVLVFAAYKHRGGDHCESCNKEMI  
IERPRRELEEVIHYGTIASGNQVMKDGVTDRISAELGGVLCFEMEGAGLAGAFPSVVI

RGICDYADLHKNKSWQPHAAATEAAFAKELLRVVPAEEIAKTNISGRISDAEKYRVLFSL  
KGIPRGRFAERPEEMRRLERVLTLYNQAQSEDIRQQVVVLHGLGGIGKTQLAAEFARRH  
QAAFTSAVFQKDRFPRQVEDTRLARLGLKAVIGDFMEWLSNTENKHWLIIFDNVDRD  
YQGETDVNAYNVSNYIPEVDHGLIMITRLANLQQLDPNDSDELLRLDGLPLALAQAA  
AYMNETGVSFSTYTRYKEQWRDLMENDNTAPLRSYGNRSINTTWTVSYNAIRAKNEA  
AANLLLLWAHLDHKTLPFWILQVGAHSSSGLAKDLSAWLRDAATDEVKFLEVVRLLRS  
YCLIGSLRGGSSIRGPHPVVHQWAFHIQDTHQRAELSKLAIIVIGYAVPDEHATEFHQKQR  
QLLPHAESCLERMERATADTMAEVNEAVSYALHKMGILLSDRGNLGKAEKMFQRALE  
GKEKACGPDHTSTLNTVNNLGNLYADQGKLVDAEKMFQRALEGKEKAWGPDHTSTLD  
TISNLGNLYFQQRKLADAEMFQRALEGYENALGPDSILSYVPALNNAYSYGTLLEDQG  
HLREAKLMYTRALRGYKLVFGADYRWYQAAKERLENLETAEDSPSNSPTDM

>10313\_t gene=10313\_g

MSNRSNIPGEVDVVIAGGGTTGVLVATRLAKADPNLSILILEHGPSTRDNPLVVNPAFYL  
TNIAPDSPRASFYKSRPSKDLGRESIVPTGRCLGGGSAINFMVYSRPQAIDFNAWNVPG  
WSGKDMIPMFKKYENFQDTPAIDASVHGVDGEFSVSSGKNAQPAFQKDFKACSSVGI  
STTADVQSFHSANAVGKFNMWIDRETGLRQDVAHCLLFPLLDQGNTGLQVATDVSVNR  
ILFDANKKATGVEYTISGTPAVVKARRLVVLASGALGSPQVLSRSGVGDKNLLSKLGI  
QVISDLPGVGSNYQDHNIFYPYKSSAGVEETIDGVVSGRLTLEEALKQKQANPTRNVIG  
WNGLCDVGLRPAEVAASLHPTLQRAWEEDFKPQPEKPLMLIATIAGYVGDHSAIDVGQ  
YFSCGPYTPYPYSRGSIHITGQSVADEPDFDCGFLSNPVDLEKLVWGYKLRQREITRMTY  
YCGPLTDGHPFIPVGSKANYEVVDRLSKAQGKFVPIEYSAEDDDAIRKFIRERVHTTWS  
LGTICAMKPREEGGVVDHDLNVHGVEGLKIIDLICPLNVSANTYATALAVGEKAATIIA  
KDLNIPYSMRSNPGVPVETFAQATDLNARL

>10314\_t gene=10314\_g

MNRHEVTFTAAYDGVKLAGTVYTAGERRPTIIMTQGFSGLRHQFLPNFAERFVAAGFTTF  
VYDNRWGDSEGLPRNNVDPVLQTRDYDAFNFKSLPDVDPEKIIYWGSSMSGGNAL  
FAAAVNKSVKAVIAQVPFVTGEVVSAPAALFCELLLQDRVNMASGKEPVMAPVLPETE  
EEALSGNSHAILKDPGVRFEELDKRGYAREKMATLQSLFHSVGHEPRAVIKRIAPRIL  
FVVAENDTTIPSNMQLQVYSEALEPKRLHIIKGASHFDPYYPGAPFEENIKVQLGFLKEIFP

>10339\_t gene=10339\_g

MTGSLNLIVLIHGSGRNPYTLRREFSSFAEQHGCALLAPLFPVGLIDPQDTVNYKYIKYK  
DVRVDRVLLAMINEAAARFGRIDTSRFLYGFSGGGQFVHRFAYLHPRRVAALACGAP  
GTQTFLDWEEKFPDGVEDWEDVFDVPIDLQAVRNIPTMFVAGDRDITDIFYAIARGRIRE  
DQRGNEEVMAKFKDGRYGATGRLCENWQEVGVKECMMVSVGAGHEERPMLLESVKA  
FFERFINTKKEEATREYECT

>10410\_t gene=10410\_g

MFNSVQIWLILSALAGALQSPEHDPQDHIGTFQNPALRRPRYRYWLPDASVDPGLLTD  
DIVQLGARGAGGIEFLNYFNYYGGVEGPAATNWTIYGYATPDYRQVLKAALQAHKDH  
MFMDYSMGPQSGQGVPAEPDNPGLAWELVSFNASIGENETYIGQVPGWGYGDLVSAVT  
FAIVNTNLSIPGIAIPGESSYYTVIENTISYASLDEVTELISPNGTIQVTVSSVSGAESYYLY  
ASYARRSYARACIASSDHPQNILQNGSFAVDHFSITGAKVTTSFLEDYVFIDGIDELLKEA  
GHYIWEDSVEIPTVYVWTPDLPTVFEERYGYSVTKYLPLLSGNEGELSDNGGPIRFLTDA  
PDQGYGFVSDFRSTMTYLLTTLGYLNEWSLRRGLQFSQQVGYNLPVDMMLAAIPSVSA  
PETETLSFRNIIDGFRQFAGPADLAGKSVISIELGADFGQAYYQWTWQLLMEAKHSFVAG



VNQVVIHGATYSHEYANTTWPGFSTFEYLFAGQHSRHQPAWDVGYKQAGDYLCRQH  
VLQAGIPKVDLVFWDKQTAQAAYPTSLYESTDLENGVYTYQYLSPENFDLPAAYVEGG  
VFAPGQQEFRAFILRGNLTPGGVEKLAQYAREGLPVIISGGISTTWASDEDAIHQAQ  
NSLSSILQLENVHQVPYTGLASFIQAIGITPRAEISSNGTWYTRWKEDAEGETYVFIYNDG  
NFSTGYISFETVGVYLLNAWTGEKTPIVEYAEQDGRVTIQFALQKTETRIVMFSASSKC  
GNEAEHVSSSDSVLGYTSTGSAIWAKVAAGNSTASVTLSSNETQLLHANPQPSFTLTN  
WTIVIQWLPPVNLVDVESLANKVNATFSVPGALLSSWSDLGLPNASGVGYTSSFFVWP  
EGEANNTGAYLVIPPAQGLTVTINGRELPPVDITNPTTDVSEYVVGKNTVLLTTASTL  
WNSLIPIWENLLTGGTGPFTSEALGYGPQSYGILGEVQVIPYQLEQIK

>10414\_t gene=10414\_g

MSSPRIAIVFYSMYGHILKLAEAEKAGIEAAGGKADIFQIAETLSEEVLAQMHPKSNYP  
VATVDTLKDYSAVLFGIPTRYGNFPAQWKAFWDRTGGIWASGGYWGKYAGLFVSTGT  
LGGGQESTCLAAMSTLAHHGIIYVPLGYKTVFPLLSNLNEVHGGSAWGAGTFAGVDGS  
RSPTALELEIATSQGKAFYETVSKVAIGGN

>10429\_t gene=10429\_g

MADNLVTFQPEGKISFSLAEGCILLDRDDFPGVHIAASFLSKDFEMVTGSPLSLTTYEGS  
LTEAEDKNCHVGSIDSSRLIQLIHNGKLVNDEIQGCWESFVMTVIDNPMSNVKKSIVIA  
GSDKRGTIYGVYTLSEQIGVSPWYWWADVPTKHPDIFIQSGRVRCGPPSVKYRGIFIND  
EAPSLTGWVLEKFGPKYNVEFYKKVFELLLRLKANFMWPAMWPGYPNPGNSFFADDSL  
NQKTANEWGIVVSTSHHEPMQRAMAWEFAENAEGSWSWIKSREKIQEYFKDGAKRAH  
DYESYITLGMRGDGRAMAVDDPPTVLRILEFQRSVINDVYGAPDKPNQLLALYKEVQ  
EYFENGLVVPDDVTLLFADDNFGSIRRLPVRTEENRSGRAGIYFHLEYVGEPRSYKWINS  
NSCGKIWQQLRLAHCRCADQIWFVNVGDIKPLELPITFAMQMAWNIESIPMENFQSFQ  
FSRLNFPTSISCKSAQLLYHIDRLLALRKHEHIEQDTSILNYNEAENILDAWEILAKQAE  
LYNGLEDQERAAFFELVLHPIRASSIYTKLRVSQAKNRLFGLQRRNATNQVAQKVLDLF  
DADFDLSDEYHSLGGKWNHMLRQPHYGYRETWHAPSRDMIDGICYVQTRQDSNPIVG  
HMGVAVEGKRGTRPGLTNEESDRTHPSRGDLIPGLTLPPLETFGQKTRYFEIFRRGTAPFT  
WKVCLPHDWIKAKPSSGTLNNTNDARVYITVDWNCAPPQFDEIVQIAISSVGDYEHV  
HLPVIRRKIPVESFTGFVESDGCITIPGTRFLRPVECSRHYHIPFLGRTEYGAVERSNVENS  
TAGLHFLEYDFYVFSNWTQFPKLVLYFTTTLDTDTTDLRYEVMVDKTSYGELRLMEEA  
PKIGDLPPGWNQAVQDCVWTRTLDLHQLQSGRHVVKIRLCNQNLLEKIVVDFGGLR  
ESYLGPPPSTFVKNGRVHS

>10430\_t gene=10430\_g

MPVAGPLGSYPLRAAAPIGKRIPRLDKNRITNFYAPGQWEKVNLLSLLNEAVYSGAPHV  
KLSVWDAPGLSRPSFREASDSSNSFRDAKVGDKFGPSWSTHWFKVFLTIPREVCCKDNIE  
LHWDCENEATVWTTNGLPLQGLTGRGERVEWIIPDSFKDGEEHLIYIEMACNGMFGNG  
PGRPIFKNNAGGDSIQPPDPDKYFELSKAEIVVDFQARMLHMDIVAICDAATEFPEDSW  
QQHKALAVATRIMNTFQAHNRDSIHECRRIAQEFGLPNINSAELFPQDGSEEIDVFAIGHC  
HIDTCWLWPWAETKRKIARSWLNQCMLMERYPELRFACSAQKQFKWLKEEYPHAWDR  
VKAKVADGKGFHPIGGCWVEHDTNLPSESLVRQFLYGRFFESNFGARSTTLWLPDFTG  
FAAQLPQLSRQAGMNRFLTQKICFNINNEFPHTTFNWWALDGSQVISHMPPVRTYTAEG  
TVADVKKSVSKHLSMDQDHTSLMAFGKGDGGGGPTWQHIERLRRRCRGVADTVGLLPR  
VHLGKSVDEFFDGLKADSLVTWHGELYFELHRGVYTTQSKSKLNNRKSEFLLRDIEL  
LATIASVSDPTYIYPKKELDMMWTSVLLCQFHDCLPGTSIKMCYDDSEKVVYDKVFATGN

TLLNEAYEVLGLEALKESSYEANSVIALNTLPWSRNEVIRLPDSELAVASGNKNILSVKK  
YALADV KPLVTILETSKNVFLQNDQLSATVENGCITSLYDRQADREIIPSGAKANQFVIF  
DDKPIYWQAWDVEVYHLETRQLPCGNTRIAENSSHRVSVVTEIRINDSSSIKSTVSLSA  
AFAGQNSYVECSADVDWHESMKFLKVEFPVDIRNTEAAYETQYGIKRPTHYNTSWDM  
AKFEVCCHKFADLSELNYGVSIIINDSKYGFATVGNTMRLSLLRSPKAPDDTADMGWHHI  
RWAIMPHRGGLSADTVRTAYAFNNPLKLLVAKSEVGPLTNGFPFLKGGDSLVDTIKR  
GEDDEDIISDELPATKGRSVIIRIYEALGGRSRGFVVTKLPVSKVYKTNLLEDNEEEVAFN  
NGQFKIDLAPFQVATYRLCLV

>10456\_t gene=10456\_g

MIFSSVFTTFSFIFARIALAGRPQNVVYWGQSTNVTRLSTYCNTVAGVDIVLSFLSTFGN  
GQTIASGNIGPSCYISSLGEPYGCEQLALDIQTCQHNGIPVILSLGGGRGPYSLNSEPEAELI  
GQNLWEAYGNTNGTGGVPRPFGTTFVNGWDFDIENAIGRQFYPSLISMLRSYFEEDPSNT  
YYITGAPQCVIPEPNMQEIIQKSVFDYLWIQFYNNPECSRPNLYDSWVELIKDTPSAAAK  
LFLGLPASPLAANGLQTGSQYYWEPAALPSAIKKYQNSSAWGGVMLWDAGHSSHIND  
NCSYAQQVQKILKSGTPCIDSNVNKTQSALMRPREKRLLAGQPDRV

>10515\_t gene=10515\_g

MTNLFVVVLVFQLIFASTTLAGRGQNAVYWGQSTNETRLSTYCTPIAGVDMVILSFLSTF  
GNGQTIASGNLGPSCYISSTGEPHGCEQLTLDIQTCQNNGIPILISLGGGSGSYSLQSEQEA  
ELIGQNLWEAYGNTNGTGGVPRPFGTTFVNGWDFDIENAIGRQFYPPPLISMLRSYFKADP  
NNTYYITGAPQCVIPEPNMQEIIQGSIFDYLWVQFYNNPECSRPTLNYNFVVEFLKDTPS  
AGAKVFLGLPASPLAANGLRTGSQYYWEPTALTPVIRMYQNSSAWGGVMLWDAGHSS  
TNMNNHCTYAQQVQSILKSGAPCLGWATVNTKRDEPMRAPGRKLFAGKPIRV

>10520\_t gene=10520\_g

MTTVTHNDYTVAWICALPLETAAARSMLDRTHSPLPMPSTDSNAYQLGELNGHYIVIVS  
LPNGIYGKVSAAA V GTRMRLTFPQLQYGLMVGIGGGVPGKSHDIRLGDVVVSKPSGKH  
SGVIQYDYGKAIQDQGFEVTGALNKPPQVLLTHMGQLEAKQMTEGQDALSHIVNGILIK  
NPNMQVRFSPDRYTDLFLHSSYHHIAGEGTCEHCDKEKLYKRQPRKTRTPQIHYGLIAS  
GDQVIKDETRDRLAQQYGILCFEMEAAGLMDELPTLVIRGICDYCDSHKQKQWQGYA  
ALTAAYAKLLLLAIPVSRPDANLLNNKMIRHWIVPLARNPKFVGRQDEITKLEELITMQ  
DGPRKIAITGLGGVGKTQVALELAHRIRDRDKECSVFWIPCTSHAIEQMFMQIAQTLGL  
RDGNLAEVKEQVKRYLSSKRAGKWL VFDNADDAEMSFAANHTAPPLEDFIPESKDGS  
LFTTRNRKLA M K L A P F N I V S I P D V D K E T A V R I L D K T L A H E G L L R D T T T T A T L L E Q L A F L P L  
AITQASAYIIENGTDLATYL TLLQE QEQYAVELLED FRDLGRYKDIQNSVMTTWLISFK  
DIQQDQLAADYLSFMACIEPRNITQSLLPQPASKKQKVDALGLLNAYSFTNKQGMDIN  
MHLRVHIATRNLWRKNA L F S H W I K R V A D H M Q N V F P D N H H T K R E L W R Q Y L P H A L A V L R  
DNEIVVQENDYLSLTRKVADCLFSDGRYQEAEIFYEKIMTITQEKS GAKHPDTLTSMADL  
ASTYRNQGRWNEAEKLFMQILEIIQIVLGAEHPVTLNSIANLASTYRNQSRWNEAEKLEV  
QVIEIRKTVLGAEHPNTLTSIANLASTYRNQGRWIEAEKLEVQVMEISKAELGAEHPNTL  
NSMGNLASTYQNQGRWNEAEKLEVQVMEIFKTVL GIEHPDTLTSMGNLASTYRNQGR  
WIEAEKLEVQVMETSRTVLGAMHPDTLISMGNLALTYQNQGRWNEAEKLEVQVMETS  
RTVLGVEHPDTLISMVNLASTYRNQGR L N E A E K L E L Q V M E C R

>10527\_t gene=10527\_g

MRSQIPKTA VRSPSIASSLADFLNTHPNLHLGGENG FV RERKHHLEILGFHALPDNQKAPI  
GEVEFEGVRGPHGTIPIRLFYLR TIVEDPKERSGKKMAALVYMHGGGYTVGVSDEFENG

LRLIAEAAGVITIGVDYRLAPEHQFPVQLDEHSA AIDWAQGP EGLRRGIHSDYVFGGGDS  
AGGNMTAALARRQDQGIKNMAGQILLYPEARIPFDTPAGEENNTGGS LYLVCNGIFSF  
ADHYLPKLPYDKTYPPSHRYISPGMQRVDDLQKNLPPVALFTSGWDPLRDVGVVEYGSK  
LQEAGVRVEWHHYDDLTHGFLQFAPWSKECMNAAMNVGSVLRK LASGSQES

>11165\_t gene=11165\_g

MVPDFFPRSLLLLNILTSASAAVLGKRTYVETDNV PKGAPSVTLKNGSYYGVHNSYYDQ  
DFFLGIPYSQPPLGELRLQVPQSLNETWTGTRNATQYSPECIGY GSDQWVLGNDISEDCL  
TINVVRPSNIAADAKLPVLFWIHG GGFTEGGSRDPRYNQSFLVQRSVEIGKPIIGVSVNYR  
LAGWGFLWGEEVAAAGVTNLGIRDQRLALHWVQENIAAFGGDPSKVTIQGESAGGASV  
GTHFIAYEGRDDGLFRAGIAESGGPTALTN YLNASAWEPNYQKIVELAGCSSASDTLACL  
RTLPTQLSTVFNTTGTSSAFVVIDGDILKESATLTKNGKFVRVPLLIGTNFDEGTAFGI  
PGINTTDEFKESLLYEAPSLPETAIEKIAELYPDDPDLGIPSTLKGRPPPGSPFGTQWKRSA  
AYGGDLTMHTGRRISTEAWARYGVPVYSYHFDVLVNGVSEYIGSTHFQEVAFVFDNTA  
GQGYGNVSVDPFANEPATFDELASIMSTAWISFVHDLDPNSNAF SNKKGINKEGLQWP  
VYGQKNPSNIAFNVNVTGLAYVEPDTFRADAIA YMADNFESYWGR

>11187\_t gene=11187\_g

MITLAGLMLYASIPAVILLHLLASPYTKVEESFHIQATHDILTYGIPSPLHLNRTAIAEKFQ  
ADYDHFSPGAVPRTFIGALALASASWPVIWFQENVDRQVLIRAILGLYNAVSLTVFARG  
IQKSFGNVTAYWYLIFQISQFHVAYYASRTLSNMFAFGMTLALRLLL PQCVRNDVKGV  
KSTGTKENATKAAKGKKEATTVSPDYSRYRLALILFTVAGIVFRSELALLLATNTLYYFL  
TRRIRIWEDIIPAGIIGLLVGLAATVTVDSYFWQEFPLWPEFSAFKFNVSQGASAWGIDP  
WYFYFTSALPRLLL NPLTWLVCIPASLLLCKTRQSSLSFIVPSLAFVAVYSFQPHKEWRFII  
YIIPALTA AAAQGAANIWTNRGKSIFYRLLSFSLVVSTLGSFLFSTFILLPISSANYPGAQAI  
QRAHFHGQGSQPRITLYMGNLACQTGVTRFLQQRNSTSVSGSEEEASIATKWEYDKTE  
DSVLKSTPEFWSTIDYALVEDQEFELQSYSSDPDSWEIIDTIVGFGGFKLIKPEPRQHDD  
GSSIEIEAIRKIAGDTGINLYKTMRDEITRRLTRGYWVEMSLVPRIRVVRHSRAI

>11249\_t gene=11249\_g

MLAFSGIENTPIVNTDTERAAANNMNGGFTEEEGSLVLPDGTSLYTKSWKPEGTPRAIL  
AFYHGYS DHCNSFFDFPNLASSGFVRS LDQRGWGRSVINNRKLRGNFGSTTTVMADL  
HFFLQSLIPFTKEGSIPLFLMGHSMGMNVLYYVLNPESPYHHQQDSTPTTKVKVAGILS  
VAPLVA VHPSTQPLKIVEYAGRIARHIVPKMTMVQKIEPKWVSKNTAVEVDIVNDKGVL  
FHSTGTLEGMAGMLDRGAWLNECYK KATVHKRDVPPLWVGHTDDKVTWF EATKKL  
VEGLDWHGDKTFREYEGAYHKL MNPEPDGVEQMTKDVAEWMEARLAKDDA

>11277\_t gene=11277\_g

MTTDDIKPLTVVVIGLGQMGHSHALAYHHNPGFQIIGLVDRRPPGKTFPNQLKDYPILSSF  
EESLSLKP DVVSVNTH TATHADYAVAAMESGAHV FVEKPLAVTVSDAERVVSTAQRTS  
RKL VIGYILRHHP SWIEFIHQARQLGPPFVMRMNLNQRSSGDAWAIHKRILEDVKNPIIDC  
GVHYVDVMLQITDSEPVQVRGMGLRLSDELPPDQGQVNYGHLQILFADGSVGVYEVG  
WGPMISETAYFVKDIIGPRGSVSIVMDESKKAAADGEDGCGSADINSHTRTSNVRVSTTV  
DGKARDKMLSMEGEPDHYELCAREQQFL LDAIREDRDL SKHMQDAVKS LGIALAADRS  
MRENRAIDLE

>11298\_t gene=11298\_g

MHSHYALFLPVLASLASAWAPPSYSGYTLLWSDSFSGAGGAS PSSSNWNIITGNLGVNG  
ELETYTSSSANVQLSGGSTIQLVPWADSSVSGGWTSGRVESKYTFTPAAGVITLAEADIR

FGTNAIANKQGIWPAFWILGDSL RHGTGWPECGELDILETVDGLLTGYGTAHCDVNP GG  
ICNEPNRGGNIVIPDQSWHTWRMTWDRTPSSWESETITWYMDGKQFFQISGSTIGDSG  
VWATLCHDPLYFILNVAVGGNWP GYPNSATLGGYGSMMMEVAVVAVYQS

>11320\_t gene=11320\_g

MHHALPPRKSSKAPPFAPRTSNLSLQRRRQIKGLGIIAFLISVLFVLSRFFSFSVSEQIAAV  
VPSGTASVVLVTLFDKQVLSERYTQWIQTNR EYASRHGYATFFANTSDYLYTLDEKTP  
RSWVQVPAVRHAMAENPFSTYFFFLDAHAFIMDPTLPLTSHVLEPKRLESLMIKDHPVVP  
PDSVIKTFSHLTPKDVELIISQDGEDLVPGSFIKQGPWARFFLDVWYDPLYRSYNFARAE  
KHALDHIVQWHATILAKIALIPQRVFN S YSKD SPDVAADGTYHDGDFVIHLNDCDAEGR  
SCEEELQPYYSMWQRKTSSSKSS

>11325\_t gene=11325\_g

MRYLTRLSMLGSLAFISILVALFLLYASGSFYAAGDELSLKGTGQIAEEDLVNNVLT TTTIP  
PDSNHRLVVFGD A WSAIGSRLAAQ GQAWPQWVCSMWPCRLEYA QREHVCKSSVCGS  
VVDGTELHTIVSDAARSLEPLDLRSQVDQWLAAELNATH TDPSGGGLKARTNNTIFAL  
SFLIWDIWKFN GVSVDDEKSMKRSLDTIFQQLDRLEKYTDSDDLHILLMLSIDPTFLPAF  
DPTQGQKDMIDIVTDWNDKLTEKANDWGN GSVLIFNTNEFLNDQIRSRQFYLAGMLDG  
HGLGNQNLWNDVENPCVSSNTWLSFLDNQDQRCENPERFLFW DGLHLGPTANQMLA  
TEIFHEIENLWTTDSNSTEST

>11348\_t gene=11348\_g

MHKTLSTSDVPSQFLQATYLTGHTPLKALDSDPRVSYALYIPPKKYDTTSDPIQLPLVILV  
HGTRRKITALYAEDVVSFANSTPCAILAPLFP SGLDGPNDLDSYKTLRSKSLSSDLAIVSM  
VEEVAARWPGVRTDKFSMMGFSGGGQFTQRFLYLYPEKLLAVSVGSPGRTTMLHLKPK  
WPEGVADVETLFD RPPRKELIQVPIQLAVGSADDQVHGSEEFWNWLELEQMKRKKDK  
DGQNEELQMRMQRLQTIRDLKEAWEREGISCQLTIVDGV SHEGEKMRPHMLRFLRPF  
QARFHKLPLENEGVN

>11381\_t gene=11381\_g

MSTTTSTSNPVVDGSTRKAIDQSTDPY YLRHPIRTLTLLFLAWKAILDPVIATSPGLGYDT  
STNLLAVSSPLIAFDTDGAATWFDSLLSRANSPSLGLWNFVRWDVIYFVRVAERGYLFE  
QEWAWGYGWTGLLRFLGSTFADTNGGVPLSAIAFSGIVISHVSHFLSALVLHALTKSLFG  
HETQSQKAFCLISAALHIISPAGAFLSAPYGESLFSLLNFTGFYLYSSALLAENARHQARR  
DILFVLGILFATA T TIRNGHIISGLFAYDAVQGA WQFLNSGLSIDLIRRTAFVVLGGSIV  
ALGSIIPQYIAYTEYCVATTRPWCGRLLPSVYSWVQVHYWNNGFLRYWTVSNLPLFILA  
APVLTAMLYSSFRALTGRLGPYHIDHVSVSQMNTSQTVALRLAIAQGILAVTTLTSLHIQI  
INRIASGYPVWYWYLAASAWGASKPFGSLNFATAVQGMVMYALIQA VLYGSFLPPA

>11406\_t gene=11406\_g

MQLTLLGLASAAYAQSLCSQYSSYTS GQYTVNNNLWGESSGSGSQCTYVNSISSSGVS  
WSTTWNWENNNSQVKS YANSQLSGLTKKYVSNLNSIPTSVQWSYSNTNIVADVSYDLF  
TAADINHVTYSGDYELMIWLAKYGG A QPLGSQIGTANVAGTNWQLWYGVNGSQKTYS  
FVASSPQTSWSGDILQFFHYLEQNEGF PASSQYLIDLQFGTEPFTGSQTTL SVNHWSAAV  
N

>11448\_t gene=11448\_g

MASPSDIRDVTLTSTFWTSMQTRSRDITIPAIHAQKSLQH WYCLTWKEGHEIKPHPFWD  
SDIYKVTEAACYFLLKNDDPSLRQEVEQA VDMIRSAQHEDGYLNSY YTVRDISKRWTN  
VRDMHEL YCLGHLVEACVAYETLTQSGRLLPEVMKALRHVDSVFGPEQGKLGHPGHP

EIELGLLRLYDLTHDPLPLKLAKYFILERGQKDENGEIFYDHEARARGGDPYDHMSAELP  
NPYHHPRYYEYQQAHAPIVEQDEIKGHSVRAMYFVTAATELVRLTGDAEVKAALDRLW  
RSTVDKKIYITGGIGTLRQSEFGFPEYFLSDTEESHACYAETCATFALIVWCSKLLRQELR  
GEYADVMEVALYNGFLGAVGLDGKSFYYQNPLRRTLGRKKERSTWFEVACPPNVAK  
LLAQLETLIYSYQQDLVAIHLWIASDFTIPQSECTTVSQTDLPWSGDIELKISGPKAVKL  
ALRIPDWAASNYTCSLSGGELKDGYLYLPAVTNTTINLTFPLQPRKVY AHPKTGKDEICI  
MRGPLVYCVEDVDNSGVDIDHIALIDGPVADAPAATIADVENVVTVKSPGKELVNTNW  
SSLYSSEGWKYGESTQELTFVPYFLRMNRGGNGGMRVWVKRISS

>11468\_t\_gene=11468\_g

MPQQLGSKDSSLFRQVVRHYENKQYKKGIKTADQILRKNPNHGDTQAMKALIMSNLGO  
LEEAFVLAKTALKNDMKSHVCWHVFGLLYRAEKNYEEAIKAYRFALRLEPESQPIQRDL  
ALLQMQRDYQGYIQRNTMLQARPSFRQNWTALAIHHLGGNLAEAVNLNTYEET  
LKTPTPRDMEHSEAVLYKNTIIAESGDLERALEHLDTAGKRCSVDLAVMEMRADYLLR  
LDRKSEAETAYAALLDRNPENSHYYDGLIKAKGLADTDHQALKAVYDELVEKFRGDA  
PRRIPLDFLEGEDFKKAADSYLQRMLRKGVPSTFANIKVLYDRPAKRDTVQELVEGYAA  
GKIEPQTNGSSESQKPEDKITFEASTFYFLAQHYNHLSRDLQKAMDYVEKAIGLVPNSV  
DYHMTKARIYKHHGALPKAAEVMEEARKLDEKDRYINTKAAKYRLRNDENDKGL EDM  
SKFTRNENVGGPLGDLHEMQCVWYLTEDGESYLRQKGLALKRFAVYNIFDVWQE  
DQDFHFSFLRKG MIRAYVDMVRWEDHLRDHPFYTRMALSIAIKTYVLLHDQPDLAHGP  
TFADMNGVDEEERKKAIKKAKKEQORLEKAEADKQELKKASAANAKGADGEVKKEDT  
DPFGNKLAQTTEPLKDALKFLTPLLEFSPGDIRAQTAGFEVYIRRQKYALALKCLLAHA  
VDSSDPTLHVQLARFRLTLNNLKEPLPEKISDVVLEEFMAILPKSTNLNEWNTYLTSHKE  
NVDHVRAALSARLLITPNEKAACEKEFVDTIDLASATLEKAISGLETLDDEWRADAATKK  
AYKEKAHNKWREASAFVSK

>11483\_t\_gene=11483\_g

MADNGTELLEKATILLQTGQAEALPLAQRVIEISDENSSNNRLLAINLVAEIYVELGEID  
AARESFLHAVQFDPEGIIPESQGGGAEKFLWLAQLSEQGGADSVAWYEKGVSA LRHHIQS  
LEQNGDADTALVLEEKRKKLAVALCGVVELYMTDLSWEDDAETRCETLITEALLVAPD  
QPDCLQTLASVRISQTRIDDARAALSRSLELWQDLPPEDPKIPDFPSRISLRLLMEVQME  
VEALQVLERLILEDDESIEAWYLGWCLYLLAEKEKESSEEKYHESMVASRGWLKQSL  
KLYQKLEYEDERLRDHALELVQELNKELGDDMDDSDDDGVPVGAEGEDEEWDGEIE  
AESDDDDDEDHEMEDS

>11502\_t\_gene=11502\_g

MASVDTSSFADLRQQYDYIIVGGGTSGLVVASRLTEDPAVSVLVLEAGSNRVSDPRIAIP  
GLAASYFDPEFDWCVTSVPQAGLNGRSLAEPRGRTLGGCSAINLGMVIYPSRTDIDAW  
EELGNEGWNWKSISHYLKKSQTLTPPSDEIKQELSLQYIDPAVQGGSGPIQVSFGDGPFA  
FNGAWPKIFENLGHKLTGDPMSGVAKGAFCGPGSIDPTTRARSHAGVAYYNEEVAKRP  
NLRVVTEILVEKILLEKDGKDAIATGVLYCAKDG VQKT VSAKREVILAAGSIKTPHLL E  
LSGIGNSTLLKSHGITTIENS NVGENLQEHGFV PFSWEAAEGQATAEALRNPEIAAAAM  
AAWQQSGAGPLGLCPLTSAFMPLSESQSGELSSLFDTYLREEVIPLLKTQYKVLRRMLE  
DREPTGQYTMAPFQILPEKGPSPKGIFGMTEPENFVSIVSVLNRPF SRGSVHLASADTKA  
LPIFDPAFFSHPLDLELHARHVRWLET LAWTEPLASLLKADGRRLQKSSPDMSLETAKDL  
ARERIICHYHVVGTAAMPLPHEQGGVVD SHLRVYGTQNL RVVDASIIPRGNTQATVFA  
VAEKAADLIRDS

>10925\_t gene=10925\_g

MRKAFASFLLLATVNPVACQTVTIKNGTLVGIRNPTYNQDFFLGVVYASPPVVRPAATKT  
CATRKLGCQNVTGPMSEDCLYLNIVRPNANVSPTAKLPVMAWIHGGGFLAGSANDLRYN  
GSFLVDNSVKMGTPVIFASFNYRLGAFGMLSGSVAEKAGVANIFLYDQRQALSWIQENI  
AEFGGDPSRVTVFGESAGAVSIGLQLLAYGGRDDGLFSAAIMESGNPYSPSLITSEAEKE  
YYFQRLLSVTNCTQALDSLACLRSAAPALSLEAASWPISVDGEILLESEASAMAEGHFLK  
KRTTKACGNITETDYQSLWEFYRIAANESGDGGLGTVLANYSGDYGAATLMIGDAFFI  
AGRRTGNQRYAAQGLPTYSYFFDAQTANLDAQEYGVAFHFQEIPFVFGNWQGVGWDVN  
PLPAGDEETRYHKLAEATMSRMWISFAVNHSPNYHKLPHYIDVEWPMYNEENPTNMAFTL  
SGVYQQADTWRQQGLEVLLGLEP

>10952\_t gene=10952\_g

MKCSFTILSLALVPYATAAPVEEVKRAATPTVTIAAPAATIVGAKSGTVDTFNGIPFAEPP  
TSSLRLKPPVALTTGLGKVTATGTARSCPQMFFSDNWSSLTGILGSLIDTPLLQTISDAGE  
DCLTINVVRPTGAGPTSCLPVLFWIFGGGFELGGTSTYDGTIVENAISNGTPIVFAVNY  
RVGGFGFLAGKEILADGSSNLGLLDQRLGLQWVADNIAQFGGDPTKVTIWGESAGSISV  
LDQMLLYDGDYTYKQPLFRGAIMDSGSIVPTNWVDGYAAQKVYDSVVSAAAGCSSAT  
DTLECLRGLDYTTYLNAANSVPGILSYNSVALSYLPRPDGTVLTDSPPELVKDKGYAPV  
PMIIGDQEDEGTLFALFQSNLSTTQEVIDYLQSVFFSYDGNETHIEGLVNAYPDDITFGSPF  
RTGIFNNWYPQYKRLAAILGDAVFTLTRRAFLNLANAANPHVPSWSYLSSYDYGTPILG  
TGHGTDILQVFYGIWPDYASSAIWSYYSFVYDLNPNANTTYPNWPQWSAGNKL VNFN  
ANSLTTIADNFRQTQYEYLYQYISDIRV

>10978\_t gene=10978\_g

MLSRSLNLLLFPVVNAGLFSPIATDNPANGIAGGTVECSAPPVSSFFADIGPPYVTNGW  
WAPYAATPGNATAAGFPFYESALYNDGVIFGLSTDRQWDGFSIKQPTQTDWCVTSEHE  
GNFANHKAFAFDTSQSVTVQYLQGSKMTFYAVPGSPYVTFEYNQATPLLTSLNNGIKSF  
NGEALTSGSNVTATGIEFNVTDSAGSTYLIYGLSSLTLTAYHDASIIASSQYTGIVRLAM  
LNQTSKALLDKHSQVYPTSVGLDYSDTDTTGLIFTWGTVGNDDLLMLTWP HHRKS  
LQSPNYPATTALSYLTTKGWMPVVLGNEWKLLYNLSNIIWNPPRPLDASCESA VIQGLE  
YEVGLLDPANAPIPGDFYYWGGALNAVAVLAVISDNLGRSDLTNLVIDYLKTSFDHWFN  
TSATTLAAYETGWGGIVDKAGAINVFIDFGNGFYNDHFFHYGYFLAIAATI AKYDSTWL  
TDHKDYINWDIINSPNDPYFPITRCRDWFAGHSWASGIANGAGSRDQESTGEANGY YG  
ALLWASVALSQDYVNYANLLMMTEIQGAQTYWHLYPSYSETDPFNPYPEADV RALITM  
GNVEDWQSGGWLFWGMKSEIAAIQQLPVQPISELLYDTEWVENVWSYALDELLDPTIS  
DDWKCVLIDAYSANANPQVAEWSNMTTWGGGQTYTNELYFIGTRENPVSTPICNSLA  
QNPLGTFRLQEYTSYNWVAASSTNTNLATLSSNADAAIFNSTFIPNSSKLQLTSTGQYV  
TADGSGDYALSATRTTASAWEQFIIRQKSGAPGGVYSILAVSNSLYVTISSEGWLINNGE  
VEADSAGFYFVKS

>10990\_t gene=10990\_g

MLWRSILLFPLLGAATAASIDDCPGYTL SNVAESDSQITGDLILAGSACNIYGEDLTNLK  
LLVEYQTNRLHVKIYDANEQVYQIPKSILDPPSGQQDSSSQSDLVFEYTNPNPFSFAIQR  
SSSGETIFNTSGTNLIFESQYVRLRTSLPSNPNIYGLGEDSDSFKRETTGYTRTLWNTGQAF  
LPTHSNLYGSHPIYIEMRDGQAHG VFLSNSNGMDIKINQTTEDVQYLEYNTIGGVLDYF  
LSGPAPADVARQYAGVVGSPAQQSYWYGFHQCKYGYRDMWVAEVVYNYNSQANIP  
LETMWTIDIDYMDLRRTWLDPDRFPLHKMQELVAYLHNHDQHYIMMVDPPVSLNDSA

SYDAAVSSDVLIQNDSGTTTFVATMWPGAVSYVDWFHPNAQSFWTGQIASFFNDQSGVG  
VDGMWIDMNEPANFCGYPCSDPVQAAIDGNDPPAPPPVRTTWDPLPGFSPDFQPPGTSS  
RRIKRTSSANMTGLSGRNLDNPGYTIANGVGPLTGGTIWPDLPQYGGYVQYDTHNLY  
ASYMIEASRQGLLARRPAERPFIIISRSTFAGDGTRGGHWTGDNASIWAHYLLSIIQNMEF  
ASIFQIPMVGADVCGFNDNTTETLCARWAMLGAWYPFYRNHADISANYQEFYRWPLVT  
AAAQKAITARFQLLDYFYTAFYQQTVDGSPTTIPLFFQYPNDPTTLNISYQFFYGPSILVS  
PVTVEGSESVSLYLPPQDIFYDFWTGERVTPDGTNLSLDNVTYTDIPVHIRGGSILPLRA  
NAGAANTTTQLRTHDFELLVAPDVDGKASGSLYLDDGKSVKPAQTYYLQFTYDNGHLS  
VNGSFDYDPGVGFKGVTVLSSSGSSTLNSAGGSNSTSKDSYGRVGIVRQIDEGFSGSWTV  
NV

>10997\_t gene=10997\_g

MHSLQTLLYAGALASTTLAYPTIHQRDSTNKLAVYWGAEDDTTTLSDVCSDDSYQIVNL  
AFVSYFNGNGGYPTLSLSTLDGPSQAQQDAGATSLQDGSSLVDTIQACQSSGKLVIMSLG  
GAVGDADVTLSGDDQANNVADMLWSLFGGGTDESITPLRPFQDVKLDGFDIDNESGDP  
TGYSAFVSRLRSNFAQDSSKTYLTAAPQCPYPDQSVPLDVCQQLDYVWVQFYNNGDC  
DVAQSGFIDAVQNWSDGIGDAKLFIGAVASDADGDEGYVDSGTLVSSLKQVEGLGLSNF  
GGAMLWEAQLAVNNDNYQQTIAAAL

>11002\_t gene=11002\_g

MAFIRSTVVAVLVTATLVTAATTGTGKRGLAYNNNNVYGNASYANEFFAHSSQVTWG  
YDWGYPSWNLSSVFEFVPMWGLPSGDDPDWTAHVHTAGTLNILGFNEPDLTYSGSSNI  
LPANAAQGYLYMQPFADIVRIGAPNVLWNNYDSTSSGGDYSSRVWTSYFMGNCTGCH  
FDFACIHWYQDCEPENGQSGADWFTSNVTDAYNTLHLPWITEFQCYGSDDQQASFLES  
VIPWLDSDQDYVERYAYFGVFPGYLLDAAGDALSASGQAYLSS

>11005\_t gene=11005\_g

MAPHLDLLEKTSQNNGTAPHQCTLLRVSGTNIIDAYGHPVILKGAGLAGHLNMENFITG  
FSGHEHQFRHALIEVLGQELATYYFERMIHYWFTDEDAKFFASLGLNCIRVPFNRYRHFID  
DKRPRILKQEGFRRLDRVVEICRKYNLVILDLHSPGGQNQDWHCDSGLARALFWEFE  
LFQEQVINLWAAIAEHYCNPIIAGYNPLNEPADPSHVGLLDWYDRVEQAIRAVDPNHIL  
FVDGNTYAMDFSHFDRVLPNTVYSCHDYSRMGFPIPGQPLYRGTDSERAQLKTQFERKV  
QFMRDWQVPIWNGEFGPVYPDLKDSQAGTTTQARLDMLQEQLRIYADSNISWSIWLYK  
DIGYQGMVYVNPETPYMKLIESFVAKKQHLGLDFWGTCKEVRDVYRPFIRQLKDMI  
PQNLHKKKYPTWTFRQVERTVRESLLSEYLVWEFAELFQGKSREELEELAKSFAFEN  
CVKREKLNALLIRDAVARG

>11009\_t gene=11009\_g

MKYSWVLAASLAVLAAASDESCPTGECRCMPTDSCWPSASSWAAFNSTVGGRLIATVPIG  
SPCHDPTYDATAACAALQAAWNLPQTHIASSSIMQTYFANDSCDPFSLESSPCLLGNVVD  
YSVNVSSANDVIAAINFAKRNNIRFVIRNTGHDYFARSTGAGSLVWVHNFNSIQYKDW  
SDSHYTGPFAFKVGAGVLGYQILEASHAKGLVTVGGECPTVGLAGGYIQGGGHSALSTAF  
GLAADNALEFQVVTASGQLLTANRFVNTDLFWAISGGGAGNYGVVIYATVKAHPDATI  
GGAGLQFLSSGTTTDFNYEAIQSFLPAMIDTGATVIYEIASSFFALNPVTAYNKTSAD  
VEALLTPFLNVLNLTAVSYTQYDSYDHYDKYMGPLPYGNLGVGEYQYGGRLIP  
RTALDSNPTGIAAAIRNITENGVIAGVALDVSNDVHNAIFPAFRNAAVTMQIGTPWS  
ETAPWADMVADQYRITDEFVPQLEAVTPGSGCYQNEANFRQPNWQETFFGSNYDALLT  
VKQKYDPDYFFYALKAVGSDYWTVDETGRCMA

>11029\_t gene=11029\_g

MAFKEYAYKEVGGGESLLASVWYNPGASETAKPIVLYFHGGSWVLGHKDMSPDYVK  
ELLDLGFSAVVSPNYRLAPTISAQEGPVQDAKDSYTSQTKLPQLLAQDANVHVNGNKI  
VTFGHSAGGTLALLMASMPQKPLAILDVFLKYNFNDISYSTPNPAWSKLPDFDQTLLDKI  
KDEVPPPSSAPAPGGPNGPDTNHRIAWLFTSLKKGTWLKSVAPNGDIDSIDPGKLFSSSS  
PFPPTYIIHGSADTLVDVKLSERAFEVLKKEGVDELVIEKEAPHGFDAGAKPGDHKYEL  
VAKGFKFLASYTV

>11055\_t gene=11055\_g

MFKRLVLTAVSKSALGALLYQRSDESCGTYTATTNYTHCGTDFCTWWHNSGEINTQT  
PVQPGNVRQSHKYSVQVSLAGANTYYDSFVYESIPRNGNGRIYAPTDPPNSNTLDSSIED  
GISIEPSIGLSMAWSQFEYDQDVDIKILTTDGSSLGSPDIVIRPVISYQISQPRDGLIVIRV  
PADANGRKFSVEFKNDLYTFRSDGNEYVTSGGSVVVGIEPTNALVIFASPFLPSGMIPNMT  
PDNTQTMTPGPINNGDWGSKSILYFPPGVYWMNQDQSGNSGKPGSNHMRLNSNTYVW  
YFAPGAYVKGAVEYFTKQNFYATGHGVLSGENYVYQANAGDNYVAVKSDSAGLRMW  
WHNNLGGGQTWYCVGPTVNAPPFNTMDFNGNSGISSQISDYKQVGAFFFTDGPFIYPN  
SIVHDFVFWHVNDDAIKTYYSGASISRATIWKCHNDPIIQMGWTSRSISGVTIDTLNVIHTR  
YIKSETAVPSAIIIGASPFYASGMSDPNQYISMTISNVVCEGLCPSLFRITPLQSYKNFVVK  
NVAFPDRLQTNISIGTGESLIPAASGLTMGLAISDWTVGGQKVNMQNFQSDSLGQLDIDG  
SYWGQWSIS

>11057\_t gene=11057\_g

MGNVLSAYHVSECEVQMPCGSGSIRGVEFDKVRRFANIPYAMPPIGQRRWRKPQLPK  
HFSYTTSHGEAFDGTKFGVCPQPDYSDAVKKKHSQHTYGEDCLRLNIWAPSVDASSES  
SPRWPVIVWFHGGWFQMGEPNQEQTDPTELVKKINVVFAVGYRLNVFGFLAGDALL  
EESSAHGVGNYGLWDQRLVMEWVHENITAFGGDPENITLSGRSAGAYSVAQVYDFR  
GSIADISRNRFRHRLVMISNAIPTQPKKIHDCQAQFDELCMHFSISLDAPGHVKLHLLRKIP  
GGNLTAAIMKLLKHTFRPVTGDGFDLDFYFRSGSFAKEFKRRGLRLFIGEVL DENTL  
YGATNGPDANQESLRLQLLNYYSPAATSRLQYYSFPPKPNVRHDWETLFGRIVADGQV  
RAPIRFLVNNLTQHGIEIHNWRYTIAYRLSFITEKVAPRSFGVSHLMDKPFWNYSILHGP  
TVLERRLMDDWIRNLEAFVWNETSYVYGTESFVETKVITPVGNIIEQEDNFWAELLTAM  
EYFCGSA

>11059\_t gene=11059\_g

MSAWWKESTVYQIYPASFKDSGDGVDLRLGIISKLDYIQALGVDIVWLNPIFSSPQVD  
MGYDISDYDIHPPYGTMEDVDVLAESLQERGMKLVMDLVVNHTSDQHPWFQEAISSIS  
NPRRDWYIWKPIIGKDGKPPNNWSSYFGGSAWEYDDRSGEYLLHLFAKEQPDLNW  
ENVEVRKAVHNIIRFWLDKGVHGFMRDVFINFISKDPSLPDATIVRDSKWQNGSAHYACG  
PRLHKYLQEIGAILKEYNAFSVGEMPEVNDCEIKA VGFQRGELNMIFHFEIVSLDHGEG  
GKFTAKNWNMQELKS VVLKWKQFMYENSGWNALYLENHDQPRIVSRLGSDQPEYREL  
SAKMLAAFLGFQSGTLFIYQGGQELGMPNVPRHWEIDQYRDIETLNHWNEVVCEGLADP  
NVSLGEYRLKSRDNARTPMQWDGSENAFGSTSSPWISVHDDYMFVNAASQIADQHSVY  
HFWRTILALRKVYDPVLIYGSFDLISSEHPDMFGYMRVSDSGRMAVVFVANFRPRVVTTWT  
PPRSSKIKSGGIIITNYPSSRLKYISEESLNLEPLEAFLWLEDMEESSRL

>11723\_t gene=11723\_g

MTVFIASLFLPYTVNFHLDKSAKTSNSSPKSKSPKSPKRNGLSAAASLFQKPQDEIikka  
MTPGATTDHEQIFTNPRTKLEPLSEYFPPTAPNGQVNILSQSEAHSPA WGSTHTFNQPRP



MNVTLPSPSILKHQERLSVAVPQVIENPKQPTMGIESQKAQQQIMRSVPSHFSFDADWTIE  
SAEQGNPGLRNAVRSFSDPGLDDTVVVGTLGMPTDALDTHVKSEIAETLEDKYSSLAV  
YVSDADFDGHYSHFCKTILWPVFHYQIPDNPKSKAYEDHSWVYYVKLNEAFAQRIAKN  
WRRGDTIWVHDYHLLLVPAMLRKLLPDAQIGFFLHVAFPSSEVFRCLAPRKELLEGVLG  
ADLIGFQIDEYCRHFLQTCRILCVEARKDGVQLEDRFVNVGKFPIDGIDPTSWDERRRSH  
DVEHWIKVISEKYEGKRLIVSRDKLDSIRGVRQKLLSYELFLNTYPEFRDQVVLIQVASST  
NEQAELDTLVSDIAMRINSTHSTLAHQPLVFLKQDLSFAQYLALITVADALMVTSLREG  
MNLTSHEFVYQCQDGKYGPKSHGPLLSEFTGSASIFDGHALLVNPWDYRQCAEAIHTALT  
LTDSEREVMWRKLDHDAVLQNSTTNWVKSFRREALSKVWDEHSSRETIAVPRLSVPRLED  
TYRNSERRLLILDYEGTLASWGSPTSILTTTPQRALATLTDLLEDPKNIVYVMSARRPEEM  
ERLFRQVSGGLIAENGCFIREPSKDSWIKLNEEHHTKEWKAGTRGILNYFRERTENSWI  
EELHCSFIFHYGDAEDKLAARQASECADHINDACASQGVHVIPVDGALIIQSSRTNKAS  
AAELVWRYSIQRGKEGGYTGQPDFLVAGDSREDEVVFRWANKLAESKAVKNCMTVT  
LGSRSTEAKATLTQGVTVLSCLQLRAASTQSEPTFSR

>11774\_t\_gene=11774\_g

MKFTDGMWCLREGITIDWMSNVERSSVEQDVVRLLLNKYQRHRGDTLNSPTISAEVTSP  
LEGIIGVKLVHWAGEVDNGPHYQIASATGHSKIDQTNDAVRIQSGPASKINTAPNDLGF  
VWQGDAGQTLTGHSFRSIGYVKDRTTNKTRWSDGLYIEHEGYMLAELNLGVNEKLYGL  
GERFGPFVKNQQRVDIWNEDGGTSSSELAYKNIPFYLSSKGYGVFVRHAGKVSLELQSER  
TTRVNISVPGQELEFYFIIFGGTPKEVLRRTTLTGQPSLVPAWSYNLWLTSFTTSYDEKT  
VTGFLDGSRRDRDPLGVFHDAFWMKSQWCDLQFDEDFPNAIAYLKRLKERGLKISV  
WLNSYVGHASPLFNEGKEKGYFIRRADGSVWQWDMWQAGMAIVDFTNPEASKWYTG  
HLMRLMDMGVDSFKTDFAERIPFQNVKFDGSDPVRMHNYSILYNKAVYEAMIGRV  
GKAKSLLFARSTAPGGQAYPVHWGGDCSTFEAMAESLRGGLSLMLSGYIFWASDIGGF  
EGTPQPALYKRWWQFGLLSSHSRLHGSGSYRVPWIYGEDCSDVLRVCKRISLTPYLL  
QEALHGHQSGVPLMRAMFLEFPDDLTTAIDTQYMLGSNLLVAPVFTEDGTVTFYVPR  
NAQDDSKGWASWFDLTKTYEPGQWYTEKHDFSSLPIRPGTVTAINSKLKTPEDDAL  
DGLEFIVNGMLESQDGKIDIVNPKDAHEVLKSIDVQKVIGNGANVVKIYSWDQI

>11804\_t\_gene=11804\_g

MRLFSISRLPSAEGDGTNSAKSKTAVIKITEVFGKSENSERGSQTD CERQQGPPRYPK  
GGKFGARFTITESVTMLFCIGVIAVLIYAGKVTGQPSGITNGDDKQYDDSKNPNDYTQY  
VNIWLTGQGGNNNPAVSRPFGMVKLGPDLYASGKDAYSGYLSNGVFSGFSMMHEQG  
TGGAPKYGVVSQLPLVGDVAAQPLSNLTVGRHSRMADGGSIGYYKAVTSEDVVVELAA  
TSRAGMYQYTFPRNIKNGNVLVDVSHVLPFRRQGLSQGYAGGKIEVAEDGHYEGYG  
VYNNGWNRSPDWTIYFCGYFNSTPISNKTYLATDADGSIAQSSGTATSNSSDVRVGSFLT  
FNTSTNNVVTSRVGISWLSTSQACTNLHNEIPANTPFSRVINDTKTLWNSEVLSKIKSSAT  
NETTLELLYTSLYMHLLPTNQTGENPGWVSGEPYQDIFTFWKDLFRCSTSLMQILQPT  
AYEEQIRSLIDIYRHEGYMPDARSSNYNGRTQGGSNADNILADAYVKGIRGKVNWTDG  
YAAMLKDAEVPPANTIPADPMAPDSSTKEGRGALPDWKTYGFITPSYARAVSRAVEYA  
YNDFSLYQVASGLNRSEDAAKYLNRSRNWRNHWNPAATSLGYKGFVPRDAEKGFQSI  
DILSSGYWHDACYEASAWAYSFMDVHDAAHMIELMGGEESFEARLNTTFEEGADGSSG  
SFIFDPTNEPMFTVPYLYNYINRPELSVLHARNIAKTYNTGVTGLPGNSDAGAMQTWL  
LWNMIGLYPITGQTTFLIHSPWFEKLSIDLGGGKLLVTATGGDNNGDEDYFVQVQVKN  
GQVWDKGLAWGDVFAQGGTIEFKLGSQDPVQWARGNVPPSPAS

>11806\_t gene=11806\_g

MAALTEQPDGTGVLKLDPWLEPFQDALKTRFAYAQDWIKKINDTEGGLEKFSRGEYEF  
GFNVKENGDIVYREWAPSAIEAYLIGDFNWDRAHPMKKNDFGVWEITLPAKDGVPV  
IPHESKIKITMVTPAGEVIDRIPAWIKRVTQDLDVSPVYDAVFWNPPADKKYSFKHDRPK  
KPASLRIYEAHVGISSPETKVTTYKNFTTNMLPRIKYLGYNAIQLMAIMEHAYYASFGYQ  
VNNFFAASSRYGPPEDLKEIDTAHSMGIVVLLDVVHSHASKNVLDGLNMFDSHLYF  
HAGPKGQHELWDSRLFNYGSHEVLRFLSNLRFWMEEYKFDGFRFDGVTSMLYTHHGI  
GTGFSGGYHEYFGPAVDSDSVMYLQVANEMLHELYPEITVAEDVSGMPALCLPLSLG  
GVGFDYRLAMAVPDMYIKWLKEKQDDEWDMGSLVHTLTNRRHGKTIAYAESHQA  
LVGDKTMMWLCDEMYTNMSVLSLTPVIDRGMSLHKMIRLVTHGLGGEGWLNFEQ  
NEFGHPEWLDFFPRAGNNNSFWYARRQLNLTEDHLLRYRFLNDFDRAMQVTEEKYQWL  
HAPQAYVSLKNQSDKVIVFERAGLLWVFNFNPTQSFADYRVGVEQEGTYRIILSDDDPD  
FGGHGRNQKETRFFTTDLPWNNRKNFLQVYIPSRTALVFALESTL

>11819\_t gene=11819\_g

MPFTKVAALSAVLALASTVAGHGYVQNIVIDGKSYSGYIVTQFPYESNPPAVIGWATTA  
TDLGFVDPTEYTNADIICHKNATPGAISATVAAGGTVELQWTTWPDSHHGPVISYLANC  
NGNCSSVDKTTLDFVKIDEGGLIDDTTTPGTWASDQLAANNSWTVTIPDTIAPGNYVLR  
HEIIALHSAGNTDGAQNYPQCINLEITGSGTASPSGTAGEKLYTPTDPGILVNIYQSLSTYV  
IPGPTLWSGAANNAVATGSATAVATTAASATATPTTLVTSVAAATGSPSTVAPASSTT  
ATSVATSVPAPVTSFVDVVTVDVVVTVTITTTVF

>11826\_t gene=11826\_g

MAESADSAPPRPDQWSVADVYITLVAPLILAAFAEWFLWLGAFGLVNVYRKAHEHW  
TTRVIAVFIMILFSMLRSVFLPVMVVTLPNNITRHFVSWALVNVLQWFAYMFVLLLV  
PWALCLYRLITSEIGRSKRMKDVLDHTVAPKVVVMPVYNEEPGILIKAIRSVVGSYDPS  
SCLHVFLSFDGEPDQLWDSIAMQLGIPLGVSKRAQSIDAIYHSVRVTVSRFPHGGRHC  
QKRTFKLIDRIYADYIARHDDLFIIDSDCILDKVCIQNFMYDMELKPGSGHDMIAMTGI  
ITSTTKTMSLITILQDMEYIHGQLFERSVESTCGSVTCLPGALTMLRFSAFRKMAYYFED  
QIDKVDDFFDYIKCHLGEDRWLTHLFMVSTVKNRIQLCTGAFCKTQAVQTMSSLIKQR  
RRWFLGFISNEVCMLTDVRIWRRYPLLCIIRFMQDITRTALLFFIMILSVSTSTSLASLPL  
GFIAISLGLNYALMLYFGYILHRFKAWLYPLMFLNPFNWLYLVYGCCTAGKRTWGGP  
RTNAPKADVHTTPREAAEQAEAQGDLDNDVSTFREYGNATIGVPLHPTESVTNRLATD  
PNYDGSDFNLESELMDYDREESAIPKIPLHPRASFDSTTTDSYSVSLPLPVESLVEEER  
KLQDIRGFDKQTLDSDRGVQLRTPPRKPNRRDLSLFPGRQDFSPQSSPTLSTVSRLDSP  
GEMNMDPVRQLVPLHLTPSPLGQSCMQNMVPEDNDHEPTVRAPLFGGIGRKSIIKGRRL  
LTLGRKSGSQ

>11862\_t gene=11862\_g

MSSKPLARERKPSIGVPVAELQAVGPGFSRPHKRTFTGFGPAEIKAVEASIPHLRETWR  
KYSATSFENKEEFERDFVRHVYTTLARSLYNCDDLAAYSQTALAFREKLIIDWNKTQQR  
QTLADQKRVYYLSLEFLMGRALDNAMLNVGKKEIAKEGLEDLGFRIEDVINQEHAAL  
GNGGLGRLAACFLDSMATLNYPAWGYGLRYRYGIFKQEIVDGYQVEIPDYWDFNPWE  
LPRHDITVDIQFYQSIRHENEKGKVNYNWQGGIVKAVAYDVPIPGYGTNTNLRWL  
SSKASSGEFDFQKFNSGEYESAVSDQQRATISAVLYPNDNLDGKELRLKQYFWCAA  
SLYDIVRRFKTKRAWFEFPDQVAIQLNDHTPLAIVELQRILIDLEGLEWDEAWKIVVG  
TFGYTNHTVLPALAEKWSVPLMEHLLPRHLQIYDINLFFLQDVEKKFPNDRDLLARVSH

EESRPKMVRMAYLAIIGSHKVNVAELHSDLIKTTIFKDFVNIYGPKFTNVTNGITPRR  
WLHQANPRLSKLIASKLGSYDFL TDL TLLDGIERFVDDKEFRKEWAEIKTENKKRLAKHI  
KDTTGYTVDPALFDVQVKRIHEYKRQQLNIFGVHRYLKIKSMTPEARKKLVPRVSIFG  
GKAAPGYWMAKTHIHLINKVGQVNVNDSVDGDLKVFIEDYNVSKAEIIVPASDISEHIS  
TAGTEASGTSNMKFVLNGLIIGTCDGANIEITREITESNIFLFGNLAEDVENLRETHRYK  
GFTLDEDLAKVFESIRSGTFGDAKAFESLIASADHGDYLVSDDFKSYIQTQELVDEDFR  
KQDDWIAKSIRSVARMGFFSTDRVIDEYAESIWNVEPLVVE

>11897\_t gene=11897\_g

MQALMRLVTAALAVAIPLAAAQTYTSCDPLNGTCPADPGLANYTFYTDFTAGDSAFEF  
WNTTAGTVNSTSQGAAFIISEEGDSPTIQTAFYFFFHVDVVKMIANGTGISSIVFLSDDL  
DEIDWEGIGTYNYEIETNYFGKDNTTSYDRATYPNVTTPSDEFHTYSVDWTPEQIQWSV  
DGD LKRTLAYDDALNGANFPQ TLMVLKLG IWAGGSSSEGE GTIEWAGGETDFSDAPFT  
MYVESVNITNYYPAKYYTYGDTTGDYTSIILSNSSSSSSNSSVTTTTTKNGTSTTTLVSN  
SSNTSSSSASASSAVISTAGAAVTELVVNPVVIVTAVVLYLFV

>11916\_t gene=11916\_g

MGFFWKLRLTIIVFFRLIHRRTQKRQPANPDFVLQIPSRDAGRSIKAHVYCPANLQTPSP  
VLLNFHSGFIMPLHGSDDFYCRRVSKETPFTVLDIQYRLSPQNSFPAPLHDIEDVVKYIK  
TSPADANVGITYDPSRICIGGFSAGGNLSLAASSMILLPNTFRSVIAFYPPADLATPPDAKS  
PPEPTDKQIPPWMAKVFDGSYFLDRDARDPRISPFYAPAENFPDNVLIVTAGQDYLADEA  
TGLAERIKKEARDKYVVSRLRVEGCGHAWDKNIGDEDIHRAKKRDEAYTAAVEMLNRSI  
S

>11926\_t gene=11926\_g

MANTTRGEDYSTQRLRQRYFHDPNMDLFLVGALGWGPAGGLSIGEAYHVASQITDGD  
AGSWSQSFENQGIAQSKQADEWKKRGLVRAAGEMRLKAFVCYRMAWQFVAPGERFIA  
LYCTHEKLFQAMTELGLPVTRFAVNYGGNLPGHFFQAADPTTPTVLVLGGADTCHE  
DRFLSQGRYLLERGSVALVDLPGQGVQEQGLHWEPAAEKPIAAVIDELISSFGVDPR  
KLVLLGMSLGGYFACRAAAHEPRLAAVIATPLTCPLELFLSVEKRAAEATISQAEKN  
MEVIMWKAGISGLSELIQRWEGMIAEPGKVQVPFLSILGEQEQVWKEQARAWHEAIPS  
SKKSFVILDAQSGADIHCQGSNPLRLTQEVDAWLREVL

>11939\_t gene=11939\_g

MHSPASYSPLDSRNSRYARPPISPTPSEQELLQPYESRDHGVSLDDPISPTESMRRYTLND  
PGAATFAAPPYQESDSASIHDRQGAQTPLSRNGSRTDALRRYGTRKIKLVQGSVLSVDYP  
VPSAIQNAIQAKYRDVEESHDEFKFMRYTAATCDPDEFTRNGYNLRPAIYNRHTELLIA  
ITYYNEDKVL TARTLHGVMQNIRDIVNLKRSEFWNKGGPAWQKIVVCLIFDGFPCDN  
TLDILATIGIYQDGLMKKDVGRETVAHIFEYTTQLSVTATQQLIRPHGDDATNLPPVQM  
MFCLKQKNSKINSHRWLFNAFSRILNPEVVILLDAGTKPGPKSLLALWQAFYNDKNLG  
GACGEIHAMLGPRWRKVLNPLVAAQNFYKISNILDKPLESSFGYVSVLPGAFSAYRYR  
AIMGRPLEQYFHGDHTLSKRLGKKGIEGMNIFKKNMFLAEDRILCFELVAKAGFKWHL  
YVKASKGETDVPESAAEFISQRRRWLNGSFAAGLYAMMHFGRIYSGHNIIRLFFLHLQ  
MIYNFCQLIMTWALGSYWLTTSVIMDLVGTPTSTHNKEVGWPFNGTATPVVNNFLKYG  
YIFFILLQFALALGNRPKATRIPTYLSFLYFSIVQLYILVLSFYLVVNAFTGGNLDNFNDNG  
IGAFKSFSSSGSIIILALVSTYGIYIIASVLYMDPWHILTSSWSYFLGMTTSINILMIYAF  
CNWHDVSWGTKGSDKADALPSAQTKKDDDSKKVFIEIDKPQADIDSQFEVTVKRALEP  
WVEPKEDDQMSVDDSYRNFRTTLVLLWVFSNLLLVLITSTGLDRLCLTNTSTTRTSWY

FEVILWATAGLSIFRFIGAMWFLVRSGLCCVSRR

>11962\_t gene=11962\_g

MSSSEDEHSDSDSHSSHSDSGRKRAPSPFYLPNVAFYAFLTSNAVAAAAYAPIQDCDEIFN  
YWEPAHYLEHGYGLQWWEYSPEYSIRSWLYVGLHAAVGIITRIWSSNKKTQFYVIRAVL  
AFVCAACETRLYSAISRSLSKRIGLLFLIIAFSPGFFHASTAFLPSTFTMYTSMGLTAFLD  
RRGRNKIAEGIMWFGTGAIIGWPFSGALILPLLAEEVLTSIFSGHWGNTLGQVVNGGMRC  
IVILGLEIGVDSLFFQRFVFPWNIVAYNVFGGEGRGNIFGTEPWTFYIRNLLLNFNVWF  
ILAASIAPLLILQAWFGGRTSSSQTLRSLAFVSPFYLWQAIFTVQPHKEERFMPAYPFL  
ALNAALALHLILAYVGTNKPGLMGLIPGKVKFIAVTAFMLLSINAGLLRSVGMVTAYG  
APLKVYDALDAFGVAQEGSVLCLGKEWYRFPSSFFLPQSMRAKFKVSEFSGLLPGEFPE  
GNSIQALLAGTSAIPRGMNDRNEEDISKYVDISQCTFLVDSYFSPRPSTDLDPDYIHDQKD  
WEVLTCHQFLDASEPTLGRVLWIPNLPFVPSRFRRQWGDYCLLRKDL

>11981\_t gene=11981\_g

MLQDTLLENILATEAAAAAPSPTQPGLISTCDDYNRVQRGDYCDRIVKKFDRLTLKKFY  
AWNPAVKPDCSELLDGYICVGISDAPSPVAQPTAAYSLMARAEPVPTPTQSGIASDCN  
NYK VITNDTCIGIAYQHAILLQFYSWNPAVGSDCQVLLAGYYVCVGISDTTTTTSSTS  
TTATSQPPPTNVEPTQSGIAPDCTEYEAQPGDTCVSIVQKYEAQGSFTLSTFERWNP  
AVGSDCKSLLAGYYCVATPKMHR

>11993\_t gene=11993\_g

MDFSKYGELVSEWTSYVLAHPINQPWTRPSEESLTEMHIAGNNARAALDQLALKARD  
LEGKFTSQDFMVETRDGSSIPLRIYTPNDALSPSEGRPIIYFHGGGFLHGSIDTERSVCESI  
ATKLNVMVVHICTRHVHEAKHPILHHDALDATKWLEHAIHGGDVSNIIVIGGVSSGAN  
LAAYVVQQFPTLSATVHNGNNAIRLKGQVLMVPWLIQPEAFPYDRFAEKSKTSLVQCA  
EALALSTERLEWLSLLQAEDITDPTINPALADDEILTRVPKTAILVAGGDPLRDDGLLYA  
TRLEKARVKTKVHVFPMPHFGVYQLPHPHVTYELRSATVSQQKMFESIWFNDGD  
EDADKGWIIEGTS

>11999\_t gene=11999\_g

MHFSTLASAGLMATTAMAYPHVLRNRFSAAKRQASGAQNVVYWGQNGGSAVENNDLS  
TYCTADAGIDIIVLAFLYEWGNGVTIPSGTIGQSCYIGTDGTGQNCDDLATAISTCQSNIGI  
KVILSLGGASGAYSLSSQEEATTIGQSLWAAYGSPNATSSASTTVPRPFGKTFVNGDFD  
LEANSNEYQYQYQYQYQYQYQYQYQYQYQYQYQYQYQYQYQYQYQYQYQYQYQYQYQYQYQY  
YNNEGCSTDTGTNFNDWITNIAGTPSSGAKIFLGVPA SEDGSTGTASGAKYYLAPSDLAT  
LVKQYSNNTAFGGIMMWDAGFSDGNVNGCTYAQEAHSILTTGSAC

>12011\_t gene=12011\_g

MHSFLTSSAALLLAAAMPLASAQTYTTCNPLTSTCPSDPGMGATVDTDFTAGASKDWT  
VAAGSISYNSNGAGFTVAKEGDAPTIQTSYDFFFGTVEVTLQAAPGTGIVSSIVLESDDL  
EVDWEALGGDITQIETNYFGKGYTGSYNRATYVGVSTPQTFHTYTVNWQRDSIQWLI  
DGSVVRTLTAAEAGDYFPQTPMRLRIGIWAGGDPSNAPGTIEWAGGQTDYSAGPFTMY  
LKSVKITNANPGSSYTYGDNSGADSIIKIDGASAAVSTTTAAPTSTHTSTSSSSSSSSSSSS  
SSSSSSSSSTLTSTSPASSTGADTSSAPSSTVSSTKSTAPSSTFSSISSNPSAVTNPISGITSS  
NSTLPASNATTPSGSTHPTSPSSTSTIAPKAGAASQTSVTSSVVALYCFLEAIVAYVL

>12013\_t gene=12013\_g

MALPQDSGGNTGTTATEDRDALSRIPTHEDFSVGEGVPKPVYSNVYGRMDLANEGLNT  
QASITADGRVDIDISEPTSRLRSMFKLPTFGPRSRATTTSATIPSSLDRRRDQKPPPLNIVIQ

VVGSRGDVQPFIALGRVLFKFSHGHRVRLATHASFQGFVEENGLEFFCIGGDPMELMAFM  
VKNPGLMPGFDALKNNGDIHRRRVEIAAIIISGCWRSCFEAGDGTGVPVSDRTVDWNNFKA  
GNVPFVADAIANPPSFAHVHCAEKLGIPLHMMFTMPWSPTQAFPHPLATIHCSKADVGI  
TNYVSYAIVEMMTWQGLGDIINRFRRSLGLAPISIMWAPSMVSRKIPQTYCWSPALIP  
KPNWGWSHIDISGFYFLSLASNYTPDDLAFLAAGPPPIYIGFGSIVVDDPNHMTQLIFD  
AVRLTGRRALVSKGWGGLGAEQLSVPEGVFM LGNCPHDWLFHHVSCVHHGGAGTTA  
AGIAAGRSTVIVPFFGDQPFWGAMVAKAGAGPQIPYKELTAEKLADAIKFALEPATSEK  
AASLAAVIEAEHGADDGAISFENHLKVDKMRCSLDPDRVAVFRIKRTHIRLSALAFAML  
NAEGKLGVDDVKLYRSQEYMTEPDPTDPVIGGGAAMLDSIEEFLMGFADLSMDVKRSL  
NSRISRSSRSSTNRKSGSQSRTVSPNAAARAKLLSDDDSSLKPFDTSSISTKDSFSMPLA  
GDTVTSPPATDGA TEDSTPLKAHTVDSTVKEARIRKHARTINDIRDL DIDGILSAGKSAAK  
VVNVGLRAPASFTMAVAKGFHNMP LLYGDDTVREQPKVTGIKSLKAAGKEFGYGFY  
DGLSGLATQPVQGAKKEGAVGAIKGFSKIGGLIFKAAA VWSLTGYTMSGIYQEIQRK  
GESVENYIMASRCAQGLIDL SACTTEKENILTKWSIFEAEVEAKKNARRNRYKLDGDG  
KRIKTRTMSEKSKDAGKTQEEQEAESL KAAERANRRESLRQLFRGRASSSPPPRKTTSES  
VLPDEYEHAIHRSVLATSQGGDTEDEMIERALRASMTENAKVAGEEEDRAYDLAVQ  
ASVREAERVIEEKKREHNERSAVGKDEKSNYYIHQPQAQPPPYSVDETDQNKPRRPPTLP  
PRSPVPIPTDHEIELQNAINESQRSYDDNLRREQREKEEMDIIMEYVKRQSLAEAEQRRRQ  
EQREEA

>12026\_t gene=12026\_g

MRGFAQLAAALAAFMVGQTLASPVARS L PGPVQVTPKKGDVVITPQNFLNGTWKGNET  
TKSDALNAA AISGTLPIEIVNNLAGSASGSINAYIQGQD TTGAI VFVLADGSFYPPGTSS  
GVPVQISENLAIPLGAQGT TTTITIPNYLISGRVYLA VGD LAFYMVSGGLVQPSATNPSDA  
SANINWGFIELTNSPTAGLFTNISYVDFIGLILGMSVTSSDGT VQTALGLTSGAVQDICTK  
LASQTASDGYPWASLCQTD TSGAYLRVLS PNDYISTDGS AFSDYWNSYVSQVYSTYASS  
PLTINTQNTPGDVTCTTGGSAILTCQGS DVTFAEPTARDIFGCNSGPF AVTGN AVDTAIVP  
RLCAAFNRGTLLLSGGNVQPSLSADSYTTSPCNYYSKFVHQNEVDGKGYAFSYDDVN  
PDGENASGELTSTDASLLSITVGGPST

>12031\_t gene=12031\_g

MAPIETKTYDFIVIGGGSGSGSARRASGWY GAKTLIVERGRS GGT CVNVGCVPKKMT  
WNFASINENLHAARHYGYD VDDNIKFDYAHFKSIRDSRIQLNGAYENNWGKEGIDL V  
HGRARFVEPKVIEVTSNDGSESKTRYT AKHILIAVGGHPVVPGIQGAEHGITS DGF FEIEE  
LPKKWAVVGAGYIAVELAGVLA AVGVETHMFIRGDTFLRKFDPMIQUETMTARYEAAGI  
KIHKQHKGFQEIQLLKEGKGAEKVLK LIGVEGDEIEVNELLWAVGRAPEVEDLHLDIPG  
VKQAHSGHII VDEFQNTSAEGIYALGDVTGQAE LTPVAIAAGRKLGSRLFGPPEFKTAKL  
SYENIPTVVFHPEVGTIGL TEPQARQRFGDDKIKVYKTRFTNMFYDFFPDEEKKQNPTQ  
MKIICAGPEEKVVGLHILGLGVGEM LQGFGVAIKMGATKQDFDSCVAIHPTASEELVTM  
R

>11558\_t gene=11558\_g

MVVQTAIGQTDNSQWQSLNASLSGALRSIYPLALPCFGNYNGTAVD TDPTDCATI QANY  
TSAAFRANLPNAWMSNQDEMCS SDPQNQCLLDNTNPTDPLAYGNGAVCNQGIVPPVYL  
EVREPDDVIAAFKHSRRRTGTKLAIKNSGH DYLTRSSGQGRLLLWTRNLQSKSYSNSFVPC  
GCPTTDIYNAITAGAGVNM DQAFSFAEQNNVTFIGAYASTVGVSGGWVQAGGHSVLSP  
VYGLGVDRVLEFKVVTPDGIYRTANACQNQDLFWALRGGGGGTFGVVLETHRVEPLL

SIIVADIAIPASAATFTPWFEMVNNLSLQWSQQGWGGHITPSSLIHVNPLLTQEAKDAMA  
PAVAFAEANNGSVTFEEFSSYYPFYLYVGSNQLNVGNVHIAGSRLIPQALFSYETGRAQ  
LMQYLQQVQAQGLSPYIPVVGPTLYNYTANSTSATPAWREAVWELGAGASWAWNSTL  
AQREAVVTKLNNLTNLVEQITPSGGAYQNEANPFTGDWQEAWWGQENYDSSLAIKHK  
YDPHGLLSCWKCVGWTEANANEGSCLSGFADST

>11602\_t gene=11602\_g

MKFRQNAALFLIAVSLFTSTVCQNDESAAVYISTLRSSSRNLTALSADPTVSQDMYF  
HISGPPSSYSYMGIGTGTVMQDSLIFVIYPNATGDGITLSPRIATGNKEPVLAPSLDVEVLPG  
SNTSNGLMTVNAHCKNCLSWISGALDLDSTAYPWNALGPNTAQYVRIKSNSPSADLE  
MHVEYGLFTLDMTRATGGAGALPTSLTNPIGSNATRPRVLTSNYPTIIHAVLATLPLVFL  
LPTGVIFLRFPPGSRVWHWVSQTLSSVISVLGIAVGIYLSWTFNKSFSFGSGHQIIGYLICA  
GILAQWFLGFWHRLYKRIQRPTNHGFVHRNFGHLVFVFAIVNAGIGLSWSQSASPVIIIG  
YSLAASVVAVVHFSLVAWKRWERRKLHASEPKPEESSPD

>11648\_t gene=11648\_g

MVYNARWGILATGGIAKTFVKDLLKASARNASDISHTVTAVASSSSASRAQDFITELSI  
PGSPKAYGSYEELVNDPNVDVIYVATPHSHHYQNARLALEAGKHVLCFAFTVNAQAQT  
KILVDIAKAKGLFLMEAVWTRYFPLSVQVRDIIQKGEEIGEVRVQADLSIGNPDGFDLA  
SRMVNLDLAGGALLDLGIYSLTWVFQTLYHTLPPSQRKPPSSIQSSMVKYPATGADEDT  
TILLTFPTTTPNDRRTSHAVAMTAFVDSHPKGTSPVRIQGTKEIQIIGPAYRPVKYRV  
VPTDESKQIREVEPEFPAGGHGMYWEADEVARCLRDGKLESEGMPWEESIVIMEVMDE  
VRKQNGLVYPEKIESVEYPVAL

>11655\_t gene=11655\_g

MVAIYLICRPYIMPFIFYLLHFV GASQPIEYHGSRHMTRFLEPRTANVTQAGVGSINFAG  
VSIFPNGSLSNLNTSNCENLLYQKINCDDISIKLWTRGYVGSFGNSTQIALLCETGCEASI  
SELRNAVSTSCGNTVGLLPGLPFIGLVDMLWSNWNQSCFTDPNTNENCNNVIANFPNVT  
DVSDLPTS DLCSYCNVEKLALMQADAYTDAYDDNWETTYKYVAQTCNISVADFNATG  
SAFNVSLPVETPSCVSNMTYTTKPGDTCDSIAISHGVSAATMFYTNPTIANCSSILPGTSLC  
LPLQCSDIYVQSNCTCTSAIANGISTQDLSFNSQLNWNCTNIHSTNPYWGSTLCVSTP  
GGHYTGQPLNTSTSTGPEIASPPAGANVAPGTTKNCGEWVNDPSHNLCAQICLANQIA  
INLLTAANPSLHKATCDDDLIAGDAYCIDPLTGWDWGTNSTSNTTTTTDIVTSTSSTSTSS  
MSMTSTATTGHTTTTTVSPGPTQSGIPANCNLYYVAQAGDTCATPEAKYGITSAQF  
HAWNPSVSSDCSQGFWANEAYCVGVSSSSTISSSTRTGVPVPPGPTQSGIPANCNKYYI  
AKTGDTCATPEAKYGITSAQFHAWNPSVSSDCSQGFWANEAYCVGV

>11656\_t gene=11656\_g

MLKAIAILVALGSLPLATADVPCSETLPCESGCCGTNKICGFGPDYCSPEKCINNCDAKA  
ECNPGDWPPQYTSATTCPLNVCCSPYGFCGIDHLHCGNTTVPRPSCDAESHAIKRVIGYY  
NSAAASRSCGGMTPLYIPQGVYTHLYFAFGSIDPNTFEVIPASPGDEQLYSELVALQSRDL  
GQQLWLSIGGWDFDAGTPTATTFSDLAADASKQNDFKSLTLFMNTYGFTGIDIDWE  
YPAADDRNGRAEDYKNFPSFLANLKKALDNYKFGLSVTLPTS YWYLQHF DLVAIEPSVD  
WFNYMSYDLHGTWDIGSQWTGAYLNAHTNLTEIKD TLDLLWRNNVDPSKVTMGMAF  
YGRSFTLASSSCSEPGCSYLSAGDAGDCSATAGILFNNEIEQIIADNKL TPTLYKDAAVKT  
ITWNGDQWVSFDDEDTWKLKADFAKSECLGGVLVWSIDNDDGKSTYSKGLAKALGNG  
INLDPSTGQTLNYPGSSDSAHLSELQPYCRFINCGETCPNGFTTVVRDDEKSQLMLDSTE  
CPPGSTGTQTLCCPTSTKVPMCRWRGFGNGKCSGGCTDNEAEVGTVSAGCRSGYQSAC

CSITESINPWWQCQWTSSCESDNTTSPSGYPKFLVSSRDGWGGRPSCGSGKNNYCCSG  
SSVPAFTNCDWFGHEVTFPNEKFCSDSCPSGSIRIAEQTITVIMGGDQPANSENCLLNE  
AYCCSGKPDQIVVPRGVGPVLDRTAEFDSLVEFLANPICADTWESNYSSIFYKRALNE  
RSTGLDQKSFSSLVSYLAMLATSLYPRTDLDFIWDQRLAQYGYLGTAPNSTYLRAVYA  
SWDGSYVYDAPSSDPSGLVADMLCNIAHSVNGTESVEFAEEALCEIDDGSSSLTKRTIAA  
MNMNDRSDNGDYPTVVAVIRGVLTSDLSLHYLRWLSAGNTRVGNIVLPQVMLEMAFW  
IGRTPGTAPDASLRAQYADRTHTQATDRWIVMHLHIPLDDRTFQRGLPQWYPGVTMMT  
VYQSQTARPWVTRGLTASYRAEFYAITVNNGDFNHGNLRDYNERTESFRCRGGRW  
WFGTDRSRQLNDLARQLGLPGGYAETINDFGVWLHNQGVFSSSNLDWIFPGIGERNQHD  
TAVPVGRVDASRLYAPRNGAFDSNWLDPGSEVPDSSLSNADP

>11678\_t gene=11678\_g

MFLKTLVYLLLIPPMCSENEAVLETCVSICQTLRGLPGTTLPNDAAYADQQALFFS  
QQQSETRPSCFLPTNASHVSHAVRLIATGSCFFAVKSGGHATFEGASNSASGITRRLTRIN  
SVLLTDNNSIAQIGDGRWHHVFELEKTNVTVPGGRTGSGVDGLTLGGGISFLSGCH  
GFVCNNVSNYEAVLADGLIVDVNATSYPDLYWALRGGGSTFAITRFDMYTHPQQMM  
WGGVRNYTIDQIDPILNAYVEFGLQASTSPSTYQITTLYYTEAEHHLTVDLYNTEPIPDPSI  
FKSLDNSLAYADTTAIKWMSNVSHINAQNQPDGHRGTYWTATYKLDRELTAFAVAEFM  
EETSHLGNLEGLEARCIMQVIMANMFHHMKKNGGNQLGISTREYPLMLLNPFVFRWDSRI  
DDLRLQTAANFMNRVNARAIELGLGEPYIYMNYASQFRDVFHSYGAANLERLQSIACK  
YDAHGIFRTLKSGYFKLKGRVGVLRVSESGDRVK

>11679\_t gene=11679\_g

MKVASHIVLGLTASSIADLEDFCAPIRRLEGGTPAQDPPVNPVIGAPYQDPNQPTWLRVE  
DLLSRMPLREKQAQLMQGELERWVNFDTGEFNVGMDHMFYHPSMLRGNLVSHPLT  
TAEIAFKGGKLLQDWIMNDTSLSLPAIQCEGMLSYSMMVWSICAYKALGLHGLGVPG  
ATIFASPIGLGASWNPVELVEKAAEYIGQEARALGITQIYGPSADLARDPRHGRVEESMSE  
DPFLAGEMVASFVQGLKTSKVASMVKHLVAFGNSEQIDMGPVRRGGERELRTTYLPPF  
KRGIDAGAYTMSSYNAYVDFSPACRFTIKETLNLFRYDGPISLINKHLLTDILRGEWDF  
KYWTTTIDYAPNRLCSVFKMYHENPIDAAITMMMLPAGGDTEGGGSFHDAVSELV  
QNGTLDISIVDET VRRVLRAKFDMLFEDPFPAAVPEDWPCLIHTDEVLQVATRLDRESI  
VLENPEQILPFGENVQRIAVIGPFSDIVSVSFWAS

>11700\_t gene=11700\_g

MSKIAHLPLLALLVGGAYSQSVSHAGVNLFGFANDMSILGSAYSEFEGTNCNASYEVYP  
YADSIDHYEAWRAKGFNMFRLALGWQHVVQTELGGPLNETTLSAVDELVTHITNDGNVA  
ILDHNYARWYCAVIGQPELSFLNPTINVTDDHFIDLWEKLAGRYANNTNVIFQLMNEPH  
DLDIVAWGNTNQKVINAIKITSEQKILVSGTQFARLTNWIASSMPGIGPSLIQDPANNTL  
YDFHQYFDDLGGAYGLCEPWSVFAADFQEVTTVLRANGYRGIITEFGGGPFQCVDLYN  
HFLSFLNRNRDVFVWGWTTWGSYSPGDLYLSLDPNSTFYTLTATLENLIPPKVNSSKV

>12118\_t gene=12118\_g

MMFSKLQSTALAAASFSALAAQAPGVRVVSRLAFNYSQKVRGVNLGGWLVLEPW  
ITPSLFEQAGPEAVDEWCLSEALGSSAQSTLSQHWNSFITADDFYQISAAGLNHVRIIPVG  
YWAVVPQGGEPEYVQGLDVLDAIGWAREAGLKVIVDLHGAPGSQNGFDNSGRRGSI  
NWDKVPISHISITLDAISALSERYATQSDVVTSEALNEPMTVIGDNGVNVWTLQYYYYD  
TWGRIREVNQDTALTMHDFQDISFWNGFMGPNVSGVWVMMMDTHHYEVFDNGLLSL  
DTTGHTQAACAFGSKVAATDKWTIVGEWTGAMTDCAKYLNRRGVGARWDGSFGQGS

SYHGSCDGYSQGEVTSLSDDTRTNIRRFIEAQLDAYEKHTGWVYWTWTTEGAPEWDM  
KRQLAANVFPNPVTSRQFPGQC

>12152\_t gene=12152\_g

MQENSVNHIPEKYLQNL DSEWKEMWIKHGQEVVGAHLVTIEELRECPAKYSFTYPIWD  
GPDVHDVQDYIVFVQDPEGTITCRVYTPSGPGFPVHLNFHGGGWVLGGLKTEAAWCR  
SMCNEAGIVVIDVDYRLAPEFFPVAIYDCWAALQWATSSAKLLNINPKSISIGGLSSGGL  
NTAVLAHFARDASPRIDLKQLMIVPATDMRYIPISPDERVRLTPETCQYPSAIFCSDLPW  
SPLERESWFLKYYIGEDPETRAKILSDWRMTPVLSPLRDLAPAHIVTAEYDVERDEAEH  
YGKMLQAAGNQVSLKRYAGMPHAFAHYNHPTRGLSKSHEFIRDTARLLAHVHAKASK  
PLSAAI

>12161\_t gene=12161\_g

MVRFATLAAAAL TASVASATVTCGSGSKCPDSAPCCSQYGECGTGAYCLGGCDPGNSF  
SLDCTPEPICQSKTFNSWDNTDNLVSNEKYLGNATEYDWVYSGDPVHNGDLILTMGN  
GSVGLTVSYNHYIWYGKVSFTKTSRDAGVVTAFILLSDAKDEIDYEFIGANLTTAQTN  
YYFQGILDYDNEVNATIDSDSFENFHTYEIDWTPDAVTWYLDGKSVRVLNKDQTYNAT  
TKQYMFQTPARLESLWPGGLASNAKGTIDWAGGEINWDSQDMQDPGYYYAIFSNISI  
TCYDPPSGANVAGSNSYIYTNSALTNNTVEIVNNSTVLANFADTGLNMTAGASTSTASA  
ATSSSTVADSIPGQSGGDAAHGAGDSSSSSTTASSSATSTSTGFNQSGSGNTKTGTASV  
NENMFQSSIFAVLVAVVALVAL

>12175\_t gene=12175\_g

MVTIRFAVVVPLLALPLGTSFALPDLRQTLQPSDADQDVTKSATQRQTLKDMIYALDV  
MQDSYFEQWLGTWPD AIDWTA AVVGTHVSGTLSSLTMTSPELLSSPIANSSVLEQTLAY  
ENLINRYFDQVSNFYFGENAFVRMQAFDDMLWVVLGWLESIKFQNLHSELHYETMNS  
TIQAQWHGKQLRVPAHRARVYELASTGWDTELCGGMIWSPYLEPYKNAITNELFIS  
ASIGMYLYFTGDPISAPFIMPSGHN RVHDPSFLAAAVRTYQWLKDSNMTGTGGLYADGF  
HIHGYKGVKNPGTKKCDV LNP MVFTYNQGVVLSGLRGLWLATSYQDYLEDGHELIQR  
VMRATGWPKTNRRNWAGLGRGGVLEEACDSSHSDCSQDGHTFKGIFHHL TEFCHVLRP  
EEVRLALFAEPGESIEEKQDTFNRWHLTQCRKYGDWVAHNAQAALATRNEQGKFGM  
WWGVTFPSAQVDITGDMEKSHIPP GAIDYVNHGEAGPGSEELQGLLRPASGAAYSEDR  
GDSTIPSKMGTPLPLTEEITAGQYENGRWVRD VNRGRGRTVETQSGGLAVLRAWYQW  
QTLSFLQ

>12210\_t gene=12210\_g

MSLKASEQSLASSGTD TSLADSIHRLRRRAKAQATPHNILLFLVAFRILNALTVRTFFQPD  
EFFQSLEPAWQVVFSGSDSGAWITWEWRHEL RSSIHLFFAAVYYVAGSFAWVARLSPLN  
AAELLIVAPKIAQAIIAAGDYITWKL SNKIYGTESYGAWATLALTVLSPWQWFCSTRT  
FSNSAETTLTIVALFLWPWEWFLDNQEADAE EEEEEEEEEDEPDETLESASRSRYRWP  
LDGDIFTIMFLTVALSSLRKCLLFAALACVLRPTNIIWVCMAGFAAYQCPRSTVFILVRE  
SVFCGSAVLA FSVLIDRLFYGVWAFPIFQFLYVNVQAQIAIFYGHNDWHYYLSQGYPLLL  
TTSLPFCLVGLYKSLRPGDATTVSRRGSIKYQLATISLVMPAVLSIAHKEVRFIYPLLPVL  
HIITAEPLVSFFLPAISSPTNGQLPRRLTLLFLVLVNVFIAYYTTLVHAPGPTDVLAYLRVR  
HNAHQEDYGHLLAPRPLFGGSDKPVQAPSKNMTVGFLMPCHSTPWRSHLVFPSIEAWA  
LSCEPPVGLNEAQKKA YLDEADQFYASPTFEFLQHHMIGGLWHIPRRPSYMSTLSPRSPST  
AYYSHQQAHSK EAAFHEWPDYLVFFAQLEPTIRTSLRSSSYGECWRTWNTAWHDDSR  
RKGDIVVWCLDPNEQEQEWK LKHKQQSDHREKQLDRFISRFKQKPSKISTYNPLNFFR



RQTNAATTTNTPGSWFSSLPWPFTSTTPSRFPFPTQRSSLLPPWFKNPLTNQORRAHYLPE  
FMQSYLPAKRSRYDPRSWFSSSSSSWSSWWPWNDKGRKRGSYAFNTNNQRGVHTSNT  
RKGWSGYGHISTFLMGYSIYVPFWVITIDGICLLMLLSWPYQNKKKMASLDDSDKTVR  
LFTTLAVCDIAIAEFVGGSVTARLMEIVRRPGHASDE

>12233\_t gene=12233\_g

MASAARTFTRAIARSNLRPVARSSRFVPAQTLRSAGRRGYSSEANAGKSNGGLFWGIG  
GLVAGGAAYFYSSGDVKAKVTGPFVPTQEDYQKVYNEIARLLVEKDDYDDGSYGPVL  
VRLAWHASGTYDKETGTGGSNGATMRFAPESDHGANAGLKLARDFLEPVHEKFPWISY  
GDLWTLAGVCAIQEMQGPVIPWRPGRQDRDVAACPDGRLPDASKGQDHIRAIIFGRMG  
FDDREIVALCGAHS LGRAHTDRSGYDGPWDFSPVFTNEFFRLLVDEKWAWKKWNGP  
AQYTDSKTKTLMMLPTDLALIKDKEFKKHVDRYAKDSEVFFNEFSEAFVKLLELGVPFK  
SEDRYVFKASE

>12292\_t gene=12292\_g

MWFLGVVLGVLPFLLTCSRAETHTFDWNVTWVTANPDGLADRQVVGINGQWPLPVVN  
VNKGDRIVVNMYNGLGDKSTSIHWHGMYQNGTSEMDGSPMVTQCPVMPGSSMTYNFT  
VNQNGTYWYHCHTDACYPDGYRAALVVHDPDSYFYDAYDEELVFTMSDWYHELTMD  
LKSSFFSLYNPTGAEPIQSFNFESISQSYVPVQAGKTYLIRLINTAAFVGGQYFWIEDHTMR  
IVEIDGIYVDETEADSLYVSVAQRYSVLVTMKNSTDRNYGMVMVADSSLLDTPSDLLL  
NQTNWLEYNASAPHDQVNITVSDSTQIYPFDDIQLVPHDRVPLYENPTKTIEVAVVMEN  
LDNGKPYALLNNISYVAPKVPTLYTVKSAGDLATDATVYGDYTHSVVLDKFDVVEIVLS  
NQDTGTHPFHLHGNDFQMVD RYPSYGENFYNYSDGTD FATYDPSNATFPTYPPRRDTFV  
LPPGGYYVIRFVANNPGVWFFHCHIDWHLMQGLAMTFITEPLEIQQIDIPDNHIDICKA  
GGVAYEGNAAANTEDYLDLKGQNTPPGFIPPGFTARGIVALVFSCISAVLGMVFLSMYG  
VSDLKFTMTESGLDGSEEIAEYRD

>12334\_t gene=12334\_g

MAQLLTKILVYFLLFASPLLANQWPLHNSLNDVVQWDHYSFELNGQRLFVFAGEWHY  
WRIPVPELWIDILEKIKAAAGFTAFAMYVNWAYHAPNNHTVDFSTGAHDITPILEMAKEV  
GLYVLLRPGPYINAETNAGGFPLWVTTGEYGLSRNDDSRYTAAWEPYFTKISEITSKYQI  
SSGGNVITYQIENEFQDQWTGSPSLRVEYEPAAKYMELLEANARQNGVDIPIANEPNIW  
AISWGKDWSNSSANVDVVGLDYPSCWSCDLVCTGTNGKYVAYEVVDYDYFQETQ  
PTMPSFLAEFQGGSYNPWGGPVGGCPGDIGPDFANLFYRW NIGQRVTAINLYMIYGGTN  
WGAIATPVVATS YDYSSPVSENRTIGAKYYETKLLTMFTRAAKDLTVTDLIGNGTQYST  
NSAVQAHV IQNPNTNGTFYVTLHTDSSSSTDETFQLRVQTSFGALSVP RYGN SIRLNHGQ  
SKIIVTD FQFGSHKLLYSTAEVLYAVLDGIPTLALWVPTGESGEFSVLGSKWASVQRCE  
GCSGVGFYPGQDSSNKTASELTVSFTQGGMSVIELDTGVRILLDRESAYYFWAPALN  
TDPSVPEDQSILVQGPHLVRSAEVDGSAIRLKGDSAQASPIEVFASKQVQVIFW NDKELK  
TSKTSYGLQASLPQPPTIELPSLGPWRYNESLPEKAPGYKDTSAAWISADHTNTSNPTVP  
TTYPVLYADEYGFHNSIRIWRGYFSGNATGVILSVQGGDAFGFSVWLNGQFLDSYLGDA  
SVEQSNLTIPFNVSHISTSSENVLIVVHDDTGHDETTGALNPRGILQATLVSDNSSVKFSQ  
WRVAGTAGGEANIDSTRGPYNEGGLYAERVGWHLPGFKDDSWSGTGSQNLNFTGADIKF  
YRTVIPLRIPEGVDVSISFELSACGATNAFRAQLFVNGYQMGRFNPNYIGNQVEFPVPPGIL  
DYTGDN TIGLSLWAQTESGACAEVDWKINYVLESSLDVTFDAEYLRPGWT SERLQYS

>12335\_t gene=12335\_g

MVPIRVGMIGLTTVTPSGEVYTPGSWGLAHLACLANS PHYTIVALCNSTVEKAQKSIEHN

KLDPTTKAYGSAEELAQDPDVLVVSVHVDKHYALVKPVLKNKKSIVYVEFPLTGSYK  
EAEDLAELAKKAGVKTVVGAQARANLALKVKELVKSKAIGDVISTSWTGHLISISTWS  
GLPESLKDFADLEGGPGRINICLGHGLDPLDGLGFEKDVQATLKTHQKTIPLFDATGTV  
VDPAYKVTAPDFIFVQGVLESGAVASINVRNTPASADEAGFRWVISGSEGEIVFTNPAGG  
YVQGHMPNAKVLKWKGEAEVDWKCSEPAHVTGVFDLAINARLYEAFATGDEDG  
YPSLESARKVHHLIDRVKKVATWAP

>12337\_t gene=12337\_g

MFNTQLSGIFIALLSIVDAAPPSASGVPWPPLNPEPYSATNRKSYFEPVSISSGLTSNTNI  
TSSRLTFNAVGDIFTIDYGVAVAGKATFEVLALEDYAQIEVKYSEAYNGLENPQGDGPF  
AFANALAAATFRVETFNITELGNITGYFIQGSQRWQSVKLVKGSGLTLGNPAFLSSIETPL  
AAQDGYFASSNSVYTDI WALGPRTKQMTCFAPGTQTATWDITKNGAYIRGQKPASTAKI  
VNLSNYTLTFEAMIDYGGTGWRVDTEIDAIQATGPIFVLTSEYPDGSFANIDRSLVPPNTL  
VLGRGWSLQNTSLPGYVLDKFLKVNVTSEKVVHKIETASHGDNTYTIYLNHEEIAHFN  
ISSYGIGDPNPYIPGGANKGFAFGPWQDQATYIRNVTVTSNNGEVLYTQPMTSADALIEY  
GVQNTNDYVQSDSGKRDRFSWMDRLISSRATLVSTADGRCVWGPTQQTLRQATSGQ  
IPANTLFSPLDVTGLIRTINVDPLVADYEFVLMITIYNYWFRSGNDTFLRDNWNTMTAT  
LSYAITRTLDDGTQLYGAPNGANGLPLSGEKGQALGPANTVSLILGLEKMAEMA EYLND  
SFAAEKYRAQAQLSRQAIDHLLWNSTGGYYSGLDTSGYDVMEDIAQVLLGEIGTAARR  
KQFLGKLDALKLPAGYSNGTRFAGTPAIVDPYFMSFLLEGLAMANETALAQGLLDDTW  
SPMVRRDVNFTGALWEYVSPDGSYPGLDLFTGQSHYWG GYSTAFLTEYALGVRPSTVG  
YSQFVFAPLPNFKVEWVQGRVPTPHGLIYANWGYGSNGKIIMDITTPQGTQATIVPPFP  
KWTCQGRSGQGGNV TITGNARLFEL

>12341\_t gene=12341\_g

MSNKLWYQQPAKCWNEALPVGNRGLGAMVYGRSTELLALNEDSVWYGGPQNRTPQI  
SAPDLALLRDLIRKEKHAEAEKLACQSFFPLPASQRHYEPLGTVFIDFNHDNEKNISNYQ  
RSLNIEKSICHVEYEW DGIQIRDIIASYPDSTLAIHIQASGPIDFTVRLTRVNEPEYETNEF  
LDDVTAQENSLVMHITPGGKNSNRACCVLSSRCIDSKGSVTAHPNNTLHIRSQNTLLVIA  
AQSEYRCNDIDKATITDCNNALQRSWDELLSRHTQDYSQLYNRMSLRGKIERSNELQK  
IPTDVRIRDVRDLGLISLYLNYSRYLLISSRNGYKALPATLQGIWNPSFTPAWGSKYTINI  
NLQMNYWPVDVCNLSESESLFALLRRMAENGVKTAKSMYNCGGWAAHNTDIWAD  
TDPQDRWIPATLWPLGGAWLCFHIWEHFQYTQDEEFLRDMFPVLRGCVEFLDLFLIESA  
DGKYLVTNPSLSPENTFYSPDRKNQGVFCEGSTIDIQIEAIFTAFLSSVNTLDVKDNALVG  
KVRDAKSRLPPMQIGSFGQLQEWMYDYEEVEPGHRHTSHLWGLHPGSSINPAQTPELAK  
AASVVLRRRAAHGGGHTGWSRAWLINLHARLSEADACEKHINLLLQNSTLPNLLDNHP  
PFQIDGNFGAGAGIEMLVQSHEEGIIRLLPACPKSWSEGAISGVRARGGFELDFEWKNS  
IIGDVIIRSISDRACTICFPNGGLTVEFEGRGEHHRPVQI

>12342\_t gene=12342\_g

MEEAMKDLQGLSRPDDFFHGYATAATQVEGAWNQDGKGLTIWDTFAHTSGRVKDKST  
PDDAVRSYDLKQDVSLMKS YGVNAYRFSLSWARIPLGGKDDPVNEKGIEYYSNLIDE  
LLSNGITPFVTLFHW DIPALEDYGGMLDQEAYTPDFVRYATVCFERFGDRVKHWITY  
NEPGVYALAGYAAGVHAPARSSFRDRNDLGDSSTEPFIVGHTQLVSHGEVARLYRERFK  
PTQNGMLGITLHGNWSEPWDASDPLDQEAERAREFEIAWYADPVHKTGDYPASMRA  
QLGDRLPRTFAESKLVLGSSDFYGMNSYTSFYVRHKTPPDINDHKGNIDQFDENKEG  
VSRGPASDTYWLRTSPWGRKLLNWIWARYHKVIYVTENGTTAKGENDINPASDKSQII



ENQSVAVGAFPIGIDPEKFLEGLKNPKVQNRIASLESKFQGMKLMVSVDRLDYIKGIPQK  
LHALEVFLSNHPEWVGKVVLVQVAVPSRQDVVEEYQNLRAVVNELVGRINGRFGTVDY  
MPIHFMHKSVNFEELLALYAVSDACIVSSTRDGMNLVSFEYIASQQKRQGVLLSEFAGA  
AQSLNGLSVVNPWNTEDLAKAYHQAVSMEPEQRAAKYQKLWKYISKYTSAFWGQSFV  
AELSRCVAHE

>12368\_t gene=12368\_g

MTLYVASLFLPYTIDFEAAGTRHGQDFDGSNPPNEVEGRLAELHQETLPKVLSMTPG  
ATTDHEKIFKPFYALDSTSDEPKGPAPTEVPVESWGSSRFKNQPLSKATNPPNSSILSRPGS  
TGPYVERMVADPDLEEPATPRVLLSDDWVVKSAVQGNGLRNAIDAAAKAGIVDKTV  
WVGTLMPTDSLKEHTRNNIALQLKEEFDSLAIIFVDSEFEGHYFHFRCRNVLYPAFHYQ  
MQESPRHKEYDDHSWKQYVVKLNEIFAATITAQWKP GDRIWIHDYHLMLLPRMLRDKLP  
EAEIGFFMHTAFPSSEIFRCLTARKTLLEGLLGANIIGLQTAEYVYHFLHTCSRILRLEVSA  
EGVHLSDRLLPVKAFPMGIDLNMNTQRLQPEVKEVWVKIRERYQGHKHLIVGRDRLDA  
AGGVKQKLLSYEKFLKRYPEWRDNVVLVQVASSAPDLTDLETQITKIAMRINSKYSTL  
THQPLVLLKQDISFAQFLALMSVSEIFIITSLREGMNL SGHDFVVCQDGTSGIPQKYGSLIL  
SEFTGSASIWNHELLVNPWDYVQCADAINRALLMSAEDKEKNWRFLSDRMAKHTAS  
MWCDTYLKALRQAYEMQSSREVHTIASLSMDSVRGKYDKSNSRVFILEDQAIFPSLRER  
DDFSASP NHK VLSMMATLSSDPKNVVFVTSRTPKQLELLLAESPQIGLIAENGAFLREP  
GQSDWQQLDENDTRDWRRGIQKFMEYFQERTEGTSIEERRFSLTFNYKAAVDKELAV  
RQAAELSDQINGSRGNIPIRAVLTDGAVTVESTNVTKATTAALALQRISATPDFLVAGN  
SRGGETLFRWANRIEREGRVEHVISVTMGTQAITAAA AVLDDNETLINGLAGLAI

>12035\_t gene=12035\_g

MATTMGYMFDKASKPEWQASQYADKVTMLKAAMDIRQSLGEDAVSMDDDDLESH  
GFSEYSTSNVNTRPVAVIKPSC TEDVSIIAKICNKYKVP MIPFGGGSSVEGHFSAPYSGFSI  
DLSQMDKIIAINEEDMDVVVQPGVNWVYLNEKIQPTGLFLPLDPSPTAHIGGMIA TNCSG  
TNALRYGTMKDWVNNLTVVLADG SVKTRRRRPRKTSAGYNLNGLFTGSEGT LGIITEIT  
LKLAILPSHFGVATTAFTITDATKAASAMIRAGVPLAALELMDEVQMSVINKTGGAAG  
RKWLEQPTLFIKFSGSKNVVEDSLVATNSIAVAHGATNFTSTEDPETMTSLWSARKQAL  
WAMLAIKPEGTQIWSTDVAVPISRLAEIVEKSKEDAAQLSLFASVLGHVGDGNFHQSVM  
YYP ERQDQVEKVRQCVDIMIDRALEMDGTVSGEHGIGLGKKSCKLEKELGSVTIDVMRRL  
KRS LDPNWLLNPGKILDF

>12038\_t gene=12038\_g

MESVPVGIKELARPTIILRQGIVLGTVLSTDLNRPIEAFRGIPYALPPTGDRRFRRPVKVRD  
SLNIIDAGHYGLSAYGCKSSTSRTDPPECS EDCLTANVFRQAAQTKQGLLPVMIYFHGGA  
FNRGTASMHTAS FVSWSEK PFLAVSFNYRLSALGFMP SRLSAEEGILNLGLWDQILLLE  
WVQENIAAFGGDKTNVTLLGVSAGAH SIGHHILRHNDTNPGPFHRAILESGAPTSKALLK  
FDAELCENQFRDFLQCVGCPKDVPEALVFQFLRSMPIETIAEAQNAVFEKYNGSLR WAF  
QPVIDGELITRHP IETRLRNKYYHIPMTGHTTNEGSLHVN RQVSTADQFISFFHRLPHLS  
HEDLCIHERLYPDPELSEDKIYKVGEDMLGFGGQYKRLEAAYGQYAYVAPVWQTAHLV  
SMNAKTPVYLYHWAPES SILGSSHGDTMRYETFDEAIVSYSPSQKALCGTFHAYIVSFIC  
KNDDPNALAGWQDRPKWERYRYNCPK KMVFGRGNEELIGGQVGVTAEMVRGSGPT  
EQCQFWWKHVHINGS

>12050\_t gene=12050\_g

MACLLQLVALTAATAAASLSQYDTNGDSA W GILPSPPELKYICDSPLEVRPPWGTSNPA

EDPPNTGVIRYYNFIVTREFKSPDGFNKSUILNNQFPGPLIEANWGDLIHVTVTNNIQSQD  
EGVTLHWHGMSQKKTPWYDGVPGVVSQCPIAPLGGTFAYTFQADQYGTGWYHSHYSSQ  
YGDGLYGPMVIYGPLQPEVDYDYDLGPVMISDYFHMSYKGLEVSFAKPPQALNVSNN  
LINGKGIYDCDANTETDGNCLRGAGLSKFRFRSGKLHRLRLINSGSLANQKFSIDHHEMT  
VIANDYVVPVQPYTTKVVTLGPGQRTDIIVNATGSPTDVVWMRSDIDMVCLQTVATIQT  
LAAIYYESADSSSTPDTTGTWESRNCQNDPLNQTVPYYQLTPPEPETVQAVTITVSFNA  
TGFIVMFMNNSFRADYNDPVLDDANAGQFSFPTERNVYNFGSNSSVRLILKNTYDVT  
PMHLHGHNFWVLAEGLGSWDGTVTNPSNPLRRDTHNLQPGTVEEPSYVVLEWMQDNP  
GIWPFHCHIAIHASAGMFILVMERPDAIQNDIQIPTVMAQDDSAVQYDLIAFGNGVIASA  
DVLVYFEME VAGIMNHLPYLIIGGFCDYAKSHQSNEHQYATVTATYAKDLLYQTIPQRV  
DAAQKARFILNGKA

>12061\_t gene=12061\_g

MAQISYDVLSHPTIGTIRGIRKTNRISQYLGVRVYAMLKDRFSRGEIQKSYSEPVLDATNYG  
PLPLIPENGLLEYKLIQKSLPSPTAFQQSDTECLTLNITGPSSSESGRRDLPVLAFLHGGGF  
TTGSSSFPHYDMSAIVEMSLECGMPIIAVGINYRVGIPGFLHSSVMSEAGYQPNNGLDDQ  
RLALQWIKANIGGFGGDPDRITLVGESAGAASGLYHFQSSEKLFDSLVMMSAPLLFRPR  
LDGAERIFKRVGDILDSRGLSPKDQLNELLSMENGDFFTKFGRRIPVPPVVDGNIVRDIPT  
FKDLRDETKMKELYPAIRHCKRIIVGDCQMDGIIFAMRIAARTDNFPRTLETCLQSTGRR  
DALEKILSPDLFDKLVVAWQKFMDGPQ

>12112\_t gene=12112\_g

MSDEQPLYINAHHLRRRPTDENIKIDKLIDTCEPELPALETIRQQYKVTTREQLARFR  
ERTTGFNKSVLDAYHARYPGSHLEHVEWSFEREGHIIGLTIFRPPDDGTGGGQPCVYYI  
HGGGFISGNRWSGITTIVRLIHDHTICVTVDYRLAPEWNAPTQLEDCYHGLVEVWKQR  
ESLGINDRLLL VGRSAGANLAVGVALRVRDSEDEEKPKICGQILSFPMLDHKSTMASEIF  
SDSPAWPFCNNQFAWSQYLGDEEKNTIYVPGIAAAQDLCDPRTLIEFAEVDCLSTE  
AQRFGQKLEAAGNDVAIIEWKLFHCGDWALLGRQDLYQDELQFRSVWAGRCFRDS
